# Supplementary material for: Study of heavy atom influence on poly-halogenated compounds using DP4/MM-DP4+/DP4+: insights and trends
Source: Royal Society of Chemistry journal article supplement (doi:10.1039/d3ob02077k), 2024-01-01
Supplement: d3ob02077k1.pdf [file d3ob02077k1.pdf]

## Study of Heavy Atom Influence on Poly-halogenated Compounds using DP4/MM-DP4+/DP4+: Insights and Trends

Lucas Passaglia<sup>a,b</sup>, María M. Zanardj<sup>b</sup>, Ariel M. Sarotti<sup>\*a</sup>

sarotti@iquir-conicet.gov.ar

a) Instituto de Química Rosario (IQUIR, CONICET-UNR) and Facultad de Ciencias Bioquímicas y Farmacéuticas, Universidad Nacional de Rosario, Suipacha 531 (S2002LRK), Rosario, República Argentina.

b) Instituto de Investigaciones en Ingeniería Ambiental, Química y Biotecnología Aplicada (INGEBIO), Facultad de Química e Ingeniería del Rosario, Pontificia Universidad Católica Argentina, S2002QEO Rosario, Argentina

### List of contents

|                                                                                                                                                                                                                                       |    |
|---------------------------------------------------------------------------------------------------------------------------------------------------------------------------------------------------------------------------------------|----|
| Computational Details .....                                                                                                                                                                                                           | 7  |
| 1. Isomers of 1 .....                                                                                                                                                                                                                 | 8  |
| <b>Table S1.1.1</b> – Experimental data of <b>1a</b> and calculated isotropic shielding constants of <b>1a-1p</b> at the PCM/mPW1PW91/6-31+G**// B3LYP/6-31G* level of theory.....                                                    | 8  |
| <b>Table S1.1.2</b> – Experimental data of <b>1a</b> and scaled chemical shifts of <b>1a-1p</b> at the PCM/mPW1PW91/6-31+G**// B3LYP/6-31G* level of theory.....                                                                      | 8  |
| <b>Table S1.1.3</b> – Experimental data of <b>1a</b> and scaled chemical shifts of <b>1a-1p</b> at the PCM/mPW1PW91/6-31+G**// B3LYP/6-31G* level of theory, excluding all the signals adjacent to bromine.....                       | 9  |
| <b>Table S1.1.4</b> – Experimental data of <b>1a</b> and scaled chemical shifts of <b>1a-1p</b> at the PCM/mPW1PW91/6-31+G**// B3LYP/6-31G* level of theory, excluding signals from nuclei adjacent to bromine and chlorine....       | 9  |
| <b>Table S1.1.5</b> – Experimental data of <b>1a</b> and scaled chemical shifts of <b>1a-1p</b> at PCM/mPW1PW91/6-31+G**// B3LYP/6-31G* level of theory, after excluding all the carbon signals adjacent to bromine and chlorine..... | 10 |
| <b>Table S1.2.1</b> – Experimental data of <b>1a</b> and calculated isotropic shielding constants of <b>1a-1p</b> at the B3LYP/6-31G**//MMFF level of theory.....                                                                     | 10 |
| <b>Table S1.2.2</b> – Experimental data of <b>1a</b> and scaled chemical shifts of <b>1a-1p</b> at the B3LYP/6-31G**//MMFF level of theory.....                                                                                       | 11 |
| <b>Table S1.2.3</b> – Experimental data of <b>1a</b> and scaled chemical shifts of <b>1a-1p</b> at the B3LYP/6-31G**//MMFF level of theory, excluding all the signals adjacent to bromine.....                                        | 11 |
| <b>Table S1.2.4</b> – Experimental data of <b>1a</b> and scaled chemical shifts of <b>1a-1p</b> at the B3LYP/6-31G**//MMFF level of theory, after excluding all the signals adjacent to bromine and chlorine.....                     | 12 |
| <b>Table S1.2.5</b> – Experimental data of <b>1a</b> and scaled chemical shifts of <b>1a-1p</b> at the B3LYP/6-31G**//MMFF level of theory, after excluding all the carbon signals adjacent to bromine and chlorine.....              | 12 |
| <b>Table S1.3.1</b> – Experimental data of <b>1a</b> and calculated isotropic shielding constants of <b>1a-1p</b> at the SMD/wB97XD/6-31+G**//MMFF level of theory.....                                                               | 13 |
| <b>Table S1.3.2</b> – Experimental data of <b>1a</b> and scaled chemical shifts of <b>1a-1p</b> at the SMD/wB97XD/6-31+G**//MMFF level of theory.....                                                                                 | 13 |
| <b>Table S1.3.3</b> – Experimental data of <b>1a</b> and scaled chemical shifts of <b>1a-1p</b> at the SMD/wB97XD/6-31+G**//MMFF level of theory, after excluding all the signals adjacent to bromine.....                            | 14 |

|                                                                                                                                                                                                                                             |    |
|---------------------------------------------------------------------------------------------------------------------------------------------------------------------------------------------------------------------------------------------|----|
| <b>Table S1.3.4</b> – Experimental data of <b>1a</b> and scaled chemical shifts of <b>1a-1p</b> at the SMD/wB97XD/6-31+G**//MMFF level of theory, after excluding all the signals adjacent to bromine and chlorine. ....                    | 14 |
| <b>Table S1.3.5</b> – Experimental data of <b>1a</b> and scaled chemical shifts of <b>1a-1p</b> at the SMD/wB97XD/6-31+G**//MMFF level of theory, after excluding all the carbon signals adjacent to bromine and chlorine. ...              | 15 |
| <b>Table S1.4.1</b> – Experimental data of <b>1a</b> and calculated isotropic shielding constants of <b>1a-1p</b> at the PCM/mPW1PW91/6-311+G**// B3LYP/6-31G* level of theory .....                                                        | 15 |
| <b>Table S1.4.2</b> – Experimental data of <b>1a</b> and scaled chemical shifts of <b>1a-1p</b> at the PCM/mPW1PW91/6-311+G**// B3LYP/6-31G* level of theory.....                                                                           | 16 |
| <b>2. Isomers of 2</b> .....                                                                                                                                                                                                                | 16 |
| <b>Table S2.1.1</b> – Experimental data of <b>2a-b</b> and calculated isotropic shielding constants of <b>2a-2h</b> at the PCM/mPW1PW91/6-31+G**// B3LYP/6-31G* level of theory.....                                                        | 16 |
| <b>Table S2a.1.2</b> – Experimental data of <b>2a</b> and scaled chemical shifts of <b>2a-2h</b> at the PCM/mPW1PW91/6-31+G**// B3LYP/6-31G* level of theory .....                                                                          | 17 |
| <b>Table S2b.1.2</b> – Experimental data of <b>2b</b> and scaled chemical shifts of <b>2a-2h</b> at the PCM/mPW1PW91/6-31+G**// B3LYP/6-31G* level of theory .....                                                                          | 17 |
| <b>Table S2a.1.3</b> – Experimental data of <b>2a</b> and scaled chemical shifts of <b>2a-2h</b> at the PCM/mPW1PW91/6-31+G**// B3LYP/6-31G* level of theory, after excluding all the signals adjacent to bromine.....                      | 18 |
| <b>Table S2b.1.3</b> – Experimental data of <b>2b</b> and scaled chemical shifts of <b>2a-2h</b> at the PCM/mPW1PW91/6-31+G**// B3LYP/6-31G* level of theory, after excluding all the signals adjacent to bromine.....                      | 18 |
| <b>Table S2a.1.4</b> – Experimental data of <b>2a</b> and scaled chemical shifts of <b>2a-2h</b> at the PCM/mPW1PW91/6-31+G**// B3LYP/6-31G* level of theory, after excluding all the signals adjacent to bromine and chlorine..            | 19 |
| <b>Table S2b.1.4</b> – Experimental data of <b>2b</b> and scaled chemical shifts of <b>2a-2h</b> at the PCM/mPW1PW91/6-31+G**// B3LYP/6-31G* level of theory, after excluding all the signals adjacent to bromine and chlorine..            | 19 |
| <b>Table S2a.1.5</b> – Experimental data of <b>2a</b> and scaled chemical shifts of <b>2a-2h</b> at the PCM/mPW1PW91/6-31+G**// B3LYP/6-31G* level of theory, after excluding all the carbon signals adjacent to bromine and chlorine. .... | 19 |
| <b>Table S2b.1.5</b> – Experimental data of <b>2b</b> and scaled chemical shifts of <b>2a-2h</b> at the PCM/mPW1PW91/6-31+G**// B3LYP/6-31G* level of theory, after excluding all the carbon signals adjacent to bromine and chlorine. .... | 20 |
| <b>Table S2.2.1</b> – Experimental data of <b>2a-b</b> and calculated isotropic shielding constants of <b>2a-2h</b> at the B3LYP/6-31G**//MMFF level of theory. ....                                                                        | 20 |
| <b>Table S2a.2.2</b> – Experimental data of <b>2a</b> and scaled shifts of <b>2a-2h</b> at the B3LYP/6-31G**//MMFF level of theory .....                                                                                                    | 20 |
| <b>Table S2b.2.2</b> – Experimental data of <b>2b</b> and scaled shifts of <b>2a-2h</b> at the B3LYP/6-31G**//MMFF level of theory .....                                                                                                    | 21 |
| <b>Table S2a.2.3</b> – Experimental data of <b>2a</b> and scaled chemical shifts of <b>2a-2h</b> at the B3LYP/6-31G**//MMFF level of theory, after excluding all the signals adjacent to bromine.....                                       | 21 |
| <b>Table S2b.2.3</b> – Experimental data of <b>2b</b> and scaled chemical shifts of <b>2a-2h</b> at the B3LYP/6-31G**//MMFF level of theory, after excluding all the signals adjacent to bromine.....                                       | 22 |
| <b>Table S2a.2.4</b> – Experimental data of <b>2a</b> and scaled chemical shifts of <b>2a-2h</b> at the B3LYP/6-31G**//MMFF level of theory, after excluding all the signals adjacent to bromine and chlorine.....                          | 22 |

|                                                                                                                                                                                                                                 |    |
|---------------------------------------------------------------------------------------------------------------------------------------------------------------------------------------------------------------------------------|----|
| <b>Table S2b.2.4</b> – Experimental data of <b>2b</b> and scaled chemical shifts of <b>2a-2h</b> at the B3LYP/6-31G**//MMFF level of theory, after excluding all the signals adjacent to bromine and chlorine.....              | 22 |
| <b>Table S2a.2.5</b> – Experimental data of <b>2a</b> and scaled chemical shifts of <b>2a-2h</b> at the B3LYP/6-31G**//MMFF level of theory, after excluding all the carbon signals adjacent to bromine and chlorine.....       | 23 |
| <b>Table S2b.2.5</b> – Experimental data of <b>2b</b> and scaled chemical shifts of <b>2a-2h</b> at the B3LYP/6-31G**//MMFF level of theory, after excluding all the carbon signals adjacent to bromine and chlorine.....       | 23 |
| <b>Table S2.3.1</b> – Experimental data of <b>2a-b</b> and calculated isotropic shielding constants of <b>2a-2h</b> at the SMD/wB97XD/6-31+G**//MMFF level of theory.....                                                       | 23 |
| <b>Table S2a.3.2</b> – Experimental data of <b>2a</b> and scaled chemical shifts of <b>2a-2h</b> at the SMD/wB97XD/6-31+G**//MMFF level of theory.....                                                                          | 24 |
| <b>Table S2b.3.2</b> – Experimental data of <b>2b</b> and scaled chemical shifts of <b>2a-2h</b> at the SMD/wB97XD/6-31+G**//MMFF level of theory.....                                                                          | 24 |
| <b>Table S2a.3.3</b> – Experimental data of <b>2a</b> and scaled chemical shifts of <b>2a-2h</b> at the SMD/wB97XD/6-31+G**//MMFF level of theory, after excluding all the signals adjacent to bromine. ....                    | 24 |
| <b>Table S2b.3.3</b> – Experimental data of <b>2b</b> and scaled chemical shifts of <b>2a-2h</b> at the SMD/wB97XD/6-31+G**//MMFF level of theory, after excluding all the signals adjacent to bromine. ....                    | 25 |
| <b>Table S2a.3.4</b> – Experimental data of <b>2a</b> and scaled chemical shifts of <b>2a-2h</b> at the SMD/wB97XD/6-31+G**//MMFF level of theory, after excluding all the signals adjacent to bromine and chlorine. ....       | 25 |
| <b>Table S2b.3.4</b> – Experimental data of <b>2b</b> and scaled chemical shifts of <b>2a-2h</b> at the SMD/wB97XD/6-31+G**//MMFF level of theory, after excluding all the signals adjacent to bromine and chlorine. ....       | 26 |
| <b>Table S2a.3.5</b> – Experimental data of <b>2a</b> and scaled chemical shifts of <b>2a-2h</b> at the SMD/wB97XD/6-31+G**//MMFF level of theory, after excluding all the carbon signals adjacent to bromine and chlorine. ... | 26 |
| <b>Table S2b.3.5</b> – Experimental data of <b>2b</b> and scaled chemical shifts of <b>2a-2h</b> at the SMD/wB97XD/6-31+G**//MMFF level of theory, after excluding all the carbon signals adjacent to bromine and chlorine. ... | 26 |
| <b>Table S2.4.1</b> – Experimental data of <b>2a-b</b> and calculated isotropic shielding constants of <b>2a-2h</b> at the PCM/mPW1PW91/6-311+G**// B3LYP/6-31G* level of theory. ....                                          | 27 |
| <b>Table S2a.4.2</b> – Experimental data of <b>2a</b> and scaled chemical shifts of <b>2a-2h</b> at the PCM/mPW1PW91/6-311+G**// B3LYP/6-31G* level of theory.....                                                              | 27 |
| <b>Table S2b.4.2</b> – Experimental data of <b>2b</b> and scaled chemical shifts of <b>2a-2h</b> at the PCM/mPW1PW91/6-311+G**// B3LYP/6-31G* level of theory.....                                                              | 27 |
| <b>3. Isomers of 3</b> .....                                                                                                                                                                                                    | 28 |
| <b>Table S3.1.1</b> – Experimental data of <b>3a</b> and calculated isotropic shielding constants of <b>3a-3h</b> at the PCM/mPW1PW91/6-31+G**// B3LYP/6-31G* level of theory.....                                              | 28 |
| <b>Table S3.1.2</b> – Experimental data of <b>3a</b> and scaled chemical shifts of <b>3a-3h</b> at the PCM/mPW1PW91/6-31+G**// B3LYP/6-31G* level of theory.....                                                                | 29 |
| <b>Table S3.1.3</b> – Experimental data of <b>3a</b> and scaled chemical of <b>3a-3h</b> at the PCM/mPW1PW91/6-31+G**// B3LYP/6-31G* level of theory, after excluding all the signals adjacent to bromine.....                  | 29 |
| <b>Table S3.1.4</b> – Experimental data of <b>3a</b> and scaled chemical shifts of <b>3a-3h</b> at the PCM/mPW1PW91/6-31+G**// B3LYP/6-31G* level of theory, after excluding all the signals adjacent to bromine and chlorine.. | 30 |

|                                                                                                                                                                                                                                            |    |
|--------------------------------------------------------------------------------------------------------------------------------------------------------------------------------------------------------------------------------------------|----|
| <b>Table S3.1.5</b> – Experimental data of <b>3a</b> and scaled chemical shifts of <b>3a-3h</b> at the PCM/mPW1PW91/6-31+G**// B3LYP/6-31G* level of theory, after excluding all the carbon signals adjacent to bromine and chlorine. .... | 30 |
| <b>Table S3.2.1</b> – Experimental data of <b>3a</b> and calculated isotropic shielding constants of <b>3a-3h</b> at the B3LYP/6-31G**//MMFF level of theory. ....                                                                         | 30 |
| <b>Table S3.2.2</b> – Experimental data of <b>3a</b> and scaled chemical shifts of <b>3a-3h</b> at the B3LYP/6-31G**//MMFF level of theory. ....                                                                                           | 31 |
| <b>Table S3.2.3</b> – Experimental data of <b>3a</b> and scaled chemical shifts of <b>3a-3h</b> at the B3LYP/6-31G**//MMFF level of theory, after excluding all the signals adjacent to bromine. ....                                      | 31 |
| <b>Table S3.2.4</b> – Experimental data of <b>3a</b> and scaled chemical shifts of <b>3a-3h</b> at the B3LYP/6-31G**//MMFF level of theory, after excluding all the signals adjacent to bromine and chlorine. ....                         | 32 |
| <b>Table S3.2.5</b> – Experimental data of <b>3a</b> and scaled chemical shifts of <b>3a-3h</b> at the B3LYP/6-31G**//MMFF level of theory, after excluding all the carbon signals adjacent to bromine and chlorine. ....                  | 32 |
| <b>Table S3.3.1</b> – Experimental data of <b>3a</b> and calculated isotropic shielding constants of <b>3a-3h</b> at the SMD/wB97XD/6-31+G**//MMFF level of theory. ....                                                                   | 33 |
| <b>Table S3.3.2</b> – Experimental data of <b>3a</b> and scaled chemical shifts of <b>3a-3h</b> at the SMD/wB97XD/6-31+G**//MMFF level of theory. ....                                                                                     | 33 |
| <b>Table S3.3.3</b> – Experimental data of <b>3a</b> and scaled chemical shifts of <b>3a-3h</b> at the SMD/wB97XD/6-31+G**//MMFF level of theory, after excluding all the signals adjacent to bromine. ....                                | 34 |
| <b>Table S3.3.4</b> – Experimental data of <b>3a</b> and scaled chemical shifts of <b>3a-3h</b> at the SMD/wB97XD/6-31+G**//MMFF level of theory, after excluding all the signals adjacent to bromine and chlorine. ....                   | 34 |
| <b>Table S3.3.5</b> – Experimental data of <b>3a</b> and scaled chemical shifts of <b>3a-3h</b> at the SMD/wB97XD/6-31+G**//MMFF level of theory, after excluding all the carbon signals adjacent to bromine and chlorine. ...             | 35 |
| <b>Table S3.4.1</b> – Experimental data of <b>3a</b> and calculated isotropic shielding constants of <b>3a-3h</b> at the PCM/mPW1PW91/6-311+G**// B3LYP/6-31G* level of theory. ....                                                       | 35 |
| <b>Table S3.4.2</b> – Experimental data of <b>3a</b> and scaled chemical shifts of <b>3a-3h</b> at the PCM/mPW1PW91/6-311+G**// B3LYP/6-31G* level of theory. ....                                                                         | 36 |
| <b>4. Results:</b> .....                                                                                                                                                                                                                   | 36 |
| <b>Table S4.1.1</b> – DP4+ results calculated for example <b>1a</b> at the PCM/mPW1PW91/6-31+G**// B3LYP/6-31G* level of theory.....                                                                                                       | 36 |
| <b>Table S4.2.1</b> – DP4 results calculated for example <b>1a</b> at the B3LYP/6-31G**//MMFF level of theory .....                                                                                                                        | 37 |
| <b>Table S4.3.1</b> – MM-DP4+ results calculated for example <b>1a</b> at the SMD/wB97XD/6-31+G**//MMFF level of theory .....                                                                                                              | 37 |
| <b>Table S4.4.1</b> – DP4+ results calculated for example <b>1a</b> at the PCM/mPW1PW91/6-311+G**// B3LYP/6-31G* level of theory.....                                                                                                      | 37 |
| <b>Table S4.1.2</b> – DP4+ results calculated for example <b>2a</b> at the PCM/mPW1PW91/6-31+G**// B3LYP/6-31G* level of theory.....                                                                                                       | 37 |
| <b>Table S4.2.2</b> – DP4 results calculated for example <b>2a</b> at the B3LYP/6-31G**//MMFF level of theory .....                                                                                                                        | 38 |
| <b>Table S4.3.2</b> – MM-DP4+ results calculated for example <b>2a</b> at the SMD/wB97XD/6-31+G**//MMFF level of theory .....                                                                                                              | 38 |

|                                                                                                                                                                                                                                                                                                                                                                                                        |    |
|--------------------------------------------------------------------------------------------------------------------------------------------------------------------------------------------------------------------------------------------------------------------------------------------------------------------------------------------------------------------------------------------------------|----|
| <b>Table S4.4.2</b> – DP4+ results calculated for example <b>2a</b> at the PCM/mPW1PW91/6-311+G**// B3LYP/6-31G* level of theory.....                                                                                                                                                                                                                                                                  | 38 |
| <b>Table S4.1.3</b> – DP4+ results calculated for example <b>2b</b> at the PCM/mPW1PW91/6-31+G**// B3LYP/6-31G* level of theory.....                                                                                                                                                                                                                                                                   | 39 |
| <b>Table S4.2.3</b> – DP4 results calculated for example <b>2b</b> at the B3LYP/6-31G**//MMFF level of theory.....                                                                                                                                                                                                                                                                                     | 39 |
| <b>Table S4.3.3</b> – MM-DP4+ results calculated for example <b>2b</b> at the SMD/wB97XD/6-31+G**//MMFF level of theory.....                                                                                                                                                                                                                                                                           | 39 |
| <b>Table S4.4.3</b> – DP4+ results calculated for example <b>2b</b> at the PCM/mPW1PW91/6-311+G**// B3LYP/6-31G* level of theory.....                                                                                                                                                                                                                                                                  | 40 |
| <b>Table S4.1.4</b> – DP4+ results calculated for example <b>3a</b> at the PCM/mPW1PW91/6-31+G**// B3LYP/6-31G* level of theory.....                                                                                                                                                                                                                                                                   | 40 |
| <b>Table S4.2.4</b> – DP4 results calculated for example <b>3a</b> at the B3LYP/6-31G**//MMFF level of theory.....                                                                                                                                                                                                                                                                                     | 40 |
| <b>Table S4.3.4</b> – MM-DP4+ results calculated for example <b>3a</b> at the SMD/wB97XD/6-31+G**//MMFF level of theory.....                                                                                                                                                                                                                                                                           | 40 |
| <b>Table S4.4.4</b> – DP4+ results calculated for example <b>3a</b> at the PCM/mPW1PW91/6-311+G**// B3LYP/6-31G* level of theory.....                                                                                                                                                                                                                                                                  | 41 |
| <b>Table S4.5</b> - MAE and MaxErr obtained for <sup>1</sup> H and <sup>13</sup> C by using the three DP4 methods under analysis...                                                                                                                                                                                                                                                                    | 41 |
| <b>5. Study of the dependence of magnetic isotropic shielding constants calculation and calculated bond distance</b> .....                                                                                                                                                                                                                                                                             | 42 |
| <b>Table 5.1</b> - Carbon-Halogen bond distances (Å) and associated <sup>13</sup> C unscaled errors (UE_C) with B3LYP/6-31G* optimized geometries (OPTB) and Molecular Mechanics (MMFF) Optimized Geometries. NMR calculations at PCM/mPW1PW91/6-31+G** level of theory.....                                                                                                                           | 42 |
| <b>Table S5.2</b> – Impact of solvation on the C-Halogen bond distance for geometries optimized at the B3LYP/6-31G* theory level. Carbon-Halogen bond distances (Å) and associated <sup>13</sup> C unscaled errors (UE_C) with B3LYP/6-31G* optimized geometries in vacuum (OPTB) and PCM/B3LYP/6-31G* Optimized Geometries (OPTB/PCM). NMR calculations at PCM/mPW1PW91/6-31+G** level of theory..... | 42 |
| <b>Table S5.3</b> – <sup>13</sup> C and <sup>1</sup> H unscaled errors (UE) for nuclei adjacent to Br and Cl, with associated Carbon-Halogen bond distances for each geometry. A: NMR Calculations with PCM/mPW1PW91/6-31+G** level. B: NMR Calculations with B3LYP/6-31G* level.....                                                                                                                  | 43 |
| <b>Table S5.4</b> – Impact of the C-Cl bond distance on the unscaled error in <sup>13</sup> C NMR at levels: PCM/mPW1PW91/6-31+G**// B3LYP/6-31G* (OPTB_DP4+), B3LYP/6-31G**//B3LYP/6-31G* (OPTB_DP4), PCM/mPW1PW91/6-31+G**//MMFF (MMFF_DP4+), and B3LYP/6-31G**//MMFF (MMFF_DP4) .....                                                                                                               | 44 |
| <b>Table S5.5</b> — Impact of the C-Br bond distance on the unscaled error in <sup>13</sup> C NMR at levels: PCM/mPW1PW91/6-31+G**// B3LYP/6-31G* (OPTB_DP4+), B3LYP/6-31G**//B3LYP/6-31G* (OPTB_DP4), PCM/mPW1PW91/6-31+G**//MMFF (MMFF_DP4+), and B3LYP/6-31G**//MMFF (MMFF_DP4) .....                                                                                                               | 48 |
| <b>Table S5.6</b> –Results obtained by removing conflicting signals. Strategy A: Removing bromine attached nucleus. Strategy B: Removing bromine and chlorine attached signals. Strategy C: Removing carbon atoms attached to bromine and chlorine.....                                                                                                                                                | 51 |

|                                                                                                                                                                                                                                                                                                                   |           |
|-------------------------------------------------------------------------------------------------------------------------------------------------------------------------------------------------------------------------------------------------------------------------------------------------------------------|-----------|
| <b>Table S5.7</b> – Dependence of diamagnetic ( $\sigma^D$ ), paramagnetic ( $\sigma^P$ ), and spin-orbit ( $\sigma^{SO}$ ) contributions of the isotropic shielding values of the $C\alpha$ with the bond distance, computed for <b>4</b> and <b>5</b> at the ZORA/mPW1PW/TZP//B3LYP/6-31G* level of theory..... | 53        |
| <b>6. Cartesian Coordinates of all significant conformers found at the MMFF and B3LYP/6-31G* level of theory for all compounds under study.....</b>                                                                                                                                                               | <b>53</b> |

## Computational Details

All the DFT calculations were performed using Gaussian 09.<sup>1</sup> For all compounds under study the conformational searches were done in using the MMFFaq force field (implemented in Spartan 14.2).<sup>22</sup> We carried out systematic conformational searches, and all conformers within a 5 kcal/mol window from the global minima were kept for further geometry optimization at DFT level. The choice for the 5 kcal/mol of cutoff was set as a balance between reducing the overall CPU calculation time and minimizing the possibility of losing further contributing conformers. The number of conformations obtained in each case varied significantly with the overall flexibility of the system. The resulting structures were submitted to GIAO NMR calculations at each of the studied levels. The chemical shifts were Boltzmann-averaged and scaled as  $\delta_s = (\delta_u - b)/m$ , where  $m$  and  $b$  are the slope and intercept, respectively, resulting from a linear regression calculation on a plot of  $\delta_u$  against  $\delta_{exp}$ . The process of data and file manipulation, such as probability calculation, was automated using the DP4+ app.<sup>3</sup>

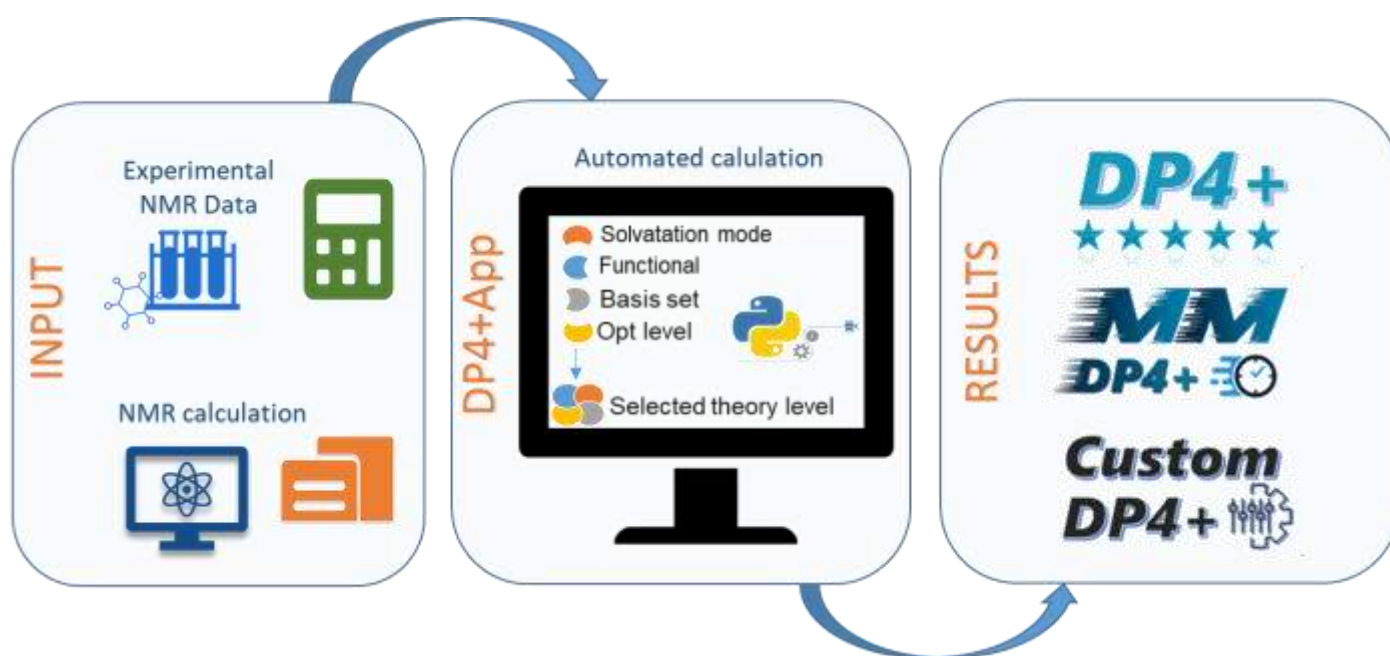

<sup>1</sup> Frisch, M. J.; Trucks, G. W.; Schlegel, H. B.; Scuseria, G. E.; Robb, M. A.; Cheeseman, J. R.; Scalmani, G.; Barone, V.; Mennucci, B.; Petersson, G. A.; Nakatsuji, H.; Caricato, M.; Li, X.; Hratchian, H. P.; Izmaylov, A. F.; Bloino, J.; Zheng, G.; Sonnenberg, J. L.; Hada, M.; Ehara, M.; Toyota, K.; Fukuda, R.; Hasegawa, J.; Ishida, M.; Nakajima, T.; Honda, Y.; Kitao, O.; Nakai, H.; Vreven, T.; Montgomery, J. A., Jr.; Peralta, J. E.; Ogliaro, F.; Bearpark, M.; Heyd, J. J.; Brothers, E.; Kudin, K. N.; Staroverov, V. N.; Kobayashi, R.; Normand, J.; Raghavachari, K.; Rendell, A.; Burant, J. C.; Iyengar, S. S.; Tomasi, J.; Cossi, M.; Rega, N.; Millam, J. M.; Klene, M.; Knox, J. E.; Cross, J. B.; Bakken, V.; Adamo, C.; Jaramillo, J.; Gomperts, R.; Stratmann, R. E.; Yazyev, O.; Austin, A. J.; Cammi, R.; Pomelli, C.; Ochterski, J. W.; Martin, R. L.; Morokuma, K.; Zakrzewski, V. G.; Voth, G. A.; Salvador, P.; Dannenberg, J. J.; Dapprich, S.; Daniels, A. D.; Farkas, O.; Foresman, J. B.; Ortiz, J. V.; Cioslowski, J.; Fox, D. J. *Gaussian 09*, Gaussian, Inc.: Wallingford, CT, **2009**.

<sup>2</sup> Spartan'14; Wavefunction: Irvine, CA

<sup>3</sup> B. A. Franco, E. R. Luciano, A. M. Sarotti, M. M. Zanardi, *J. Nat. Prod.* **2023**

## 1. Isomers of 1

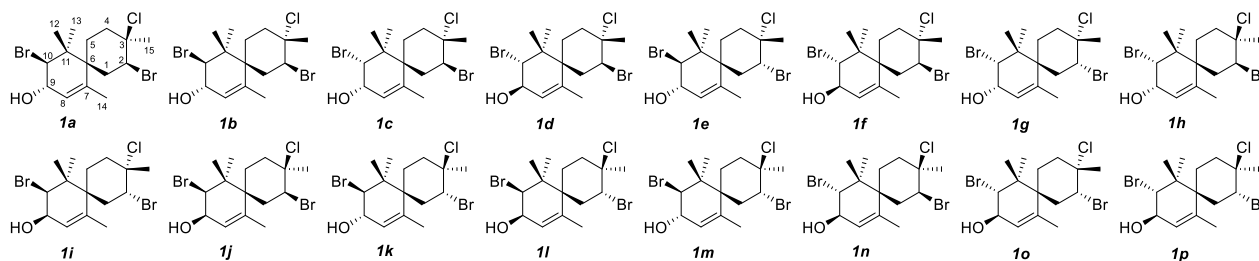

X. Q. Yu, C. S. Jiang, Y. Zhang, P. Sun, T. Kurtán, A. Mándi, X. L. Li, L. G. Yao, A. H. Liu, B. Wang, Y. W. Guo, S. C. Mao, *Phytochemistry* **2017**, 136, 81–93

**Table S1.1.1** – Experimental data of **1a** and calculated isotropic shielding constants of **1a-1p** at the PCM/mPW1PW91/6-31+G\*\*// B3LYP/6-31G\* level of theory.

| DP4+     |       |                               |        |        |        |        |        |        |        |        |        |        |        |        |        |        |        |
|----------|-------|-------------------------------|--------|--------|--------|--------|--------|--------|--------|--------|--------|--------|--------|--------|--------|--------|--------|
| Compound | 1a    | 1b                            | 1c     | 1d     | 1e     | 1f     | 1g     | 1h     | 1i     | 1j     | 1k     | 1l     | 1m     | 1n     | 1o     | 1p     |        |
| Nuclei   | Exp   | Isotropic shielding constants |        |        |        |        |        |        |        |        |        |        |        |        |        |        |        |
| C1       | 38.2  | 35.19                         | 36.82  | 41.38  | 37.11  | 33.94  | 42.05  | 37.20  | 40.27  | 35.69  | 35.22  | 36.12  | 37.54  | 38.53  | 39.94  | 38.42  | 39.45  |
| C2       | 60.7  | 71.63                         | 73.25  | 73.15  | 73.47  | 71.11  | 72.25  | 70.57  | 70.99  | 71.05  | 71.16  | 72.94  | 73.51  | 72.14  | 70.68  | 70.16  | 72.07  |
| C3       | 71.9  | 78.42                         | 78.13  | 79.02  | 78.58  | 79.95  | 78.39  | 80.60  | 78.79  | 81.09  | 78.33  | 78.70  | 79.75  | 79.94  | 78.36  | 79.48  | 79.23  |
| C4       | 38.7  | 37.26                         | 38.46  | 39.11  | 38.41  | 38.01  | 38.85  | 37.71  | 39.02  | 37.66  | 37.88  | 38.61  | 38.75  | 37.80  | 37.59  | 37.68  | 39.19  |
| C5       | 30.1  | 27.96                         | 30.43  | 25.60  | 28.27  | 25.43  | 24.65  | 23.07  | 23.56  | 23.92  | 26.36  | 28.08  | 24.54  | 25.00  | 22.24  | 22.55  | 23.53  |
| C6       | 48.3  | 50.87                         | 52.50  | 52.22  | 53.73  | 52.27  | 51.72  | 51.99  | 50.95  | 49.94  | 53.75  | 52.31  | 51.42  | 50.40  | 52.05  | 53.14  | 51.24  |
| C7       | 143.4 | 138.96                        | 138.09 | 139.24 | 139.78 | 137.29 | 137.84 | 139.78 | 139.96 | 139.51 | 140.34 | 136.97 | 137.00 | 139.25 | 138.10 | 138.15 | 136.77 |
| C8       | 123.8 | 118.49                        | 118.85 | 120.20 | 119.81 | 119.09 | 119.58 | 119.95 | 119.68 | 120.43 | 119.41 | 120.02 | 122.52 | 120.44 | 119.24 | 118.84 | 119.86 |
| C9       | 73.2  | 70.08                         | 70.00  | 64.85  | 65.58  | 70.00  | 70.60  | 64.84  | 64.43  | 64.76  | 65.32  | 69.71  | 64.69  | 65.30  | 70.04  | 69.01  | 69.74  |
| C10      | 71.7  | 83.77                         | 83.70  | 82.36  | 81.42  | 85.63  | 81.61  | 83.43  | 83.66  | 84.64  | 82.81  | 84.82  | 84.96  | 82.96  | 83.31  | 84.95  | 85.00  |
| C11      | 45.8  | 44.60                         | 44.84  | 43.68  | 43.23  | 44.26  | 45.83  | 43.20  | 43.69  | 42.10  | 43.64  | 44.13  | 42.87  | 43.96  | 45.49  | 44.22  | 44.25  |
| C12      | 25.3  | 22.16                         | 22.71  | 22.57  | 23.09  | 26.69  | 23.48  | 25.24  | 21.48  | 25.37  | 22.13  | 27.35  | 26.55  | 24.80  | 22.32  | 25.84  | 24.84  |
| C13      | 18.1  | 16.00                         | 15.44  | 17.95  | 17.05  | 16.32  | 15.41  | 21.76  | 17.28  | 24.33  | 17.32  | 16.35  | 23.03  | 20.53  | 15.12  | 16.73  | 16.54  |
| C14      | 25.6  | 23.98                         | 24.62  | 25.66  | 25.91  | 19.40  | 25.42  | 19.95  | 25.04  | 19.33  | 25.44  | 20.49  | 18.69  | 21.85  | 25.16  | 19.93  | 21.13  |
| C15      | 33.0  | 28.42                         | 19.94  | 20.81  | 22.37  | 28.40  | 20.13  | 28.53  | 29.00  | 28.00  | 28.70  | 21.21  | 21.98  | 24.91  | 28.18  | 28.70  | 24.94  |
| H1a      | 2.43  | 2.23                          | 2.19   | 2.35   | 2.24   | 2.54   | 2.39   | 2.16   | 2.65   | 2.95   | 2.21   | 2.32   | 3.25   | 2.22   | 2.67   | 2.15   | 2.19   |
| H1b      | 2.09  | 2.10                          | 2.08   | 2.01   | 2.06   | 2.16   | 2.18   | 1.92   | 1.87   | 2.20   | 2.11   | 2.25   | 1.98   | 1.89   | 2.06   | 2.06   | 1.95   |
| H2       | 4.57  | 4.67                          | 4.85   | 4.70   | 4.77   | 4.63   | 4.79   | 4.46   | 4.47   | 4.65   | 4.52   | 4.81   | 4.90   | 4.62   | 4.58   | 4.48   | 4.81   |
| H4a      | 2.19  | 2.12                          | 2.31   | 2.43   | 2.23   | 2.04   | 2.42   | 2.01   | 2.12   | 1.94   | 2.02   | 2.36   | 2.17   | 2.21   | 2.15   | 2.11   | 2.26   |
| H4b      | 1.93  | 2.03                          | 2.20   | 2.19   | 2.11   | 2.03   | 2.21   | 2.00   | 2.09   | 1.94   | 1.94   | 2.09   | 1.99   | 2.16   | 2.11   | 1.99   | 2.20   |
| H5a      | 2.51  | 2.42                          | 2.16   | 1.87   | 2.16   | 1.98   | 1.86   | 2.19   | 2.08   | 2.06   | 2.44   | 1.72   | 1.79   | 2.13   | 2.16   | 2.42   | 1.98   |
| H5b      | 1.62  | 1.59                          | 1.61   | 1.69   | 1.58   | 1.63   | 1.59   | 2.14   | 1.71   | 1.55   | 1.48   | 1.69   | 1.57   | 1.80   | 1.44   | 1.68   | 1.81   |
| H8       | 5.41  | 5.54                          | 5.48   | 5.46   | 5.41   | 5.56   | 5.43   | 5.53   | 5.54   | 5.41   | 5.51   | 5.55   | 5.30   | 5.48   | 5.50   | 5.56   | 5.57   |
| H9       | 4.28  | 4.00                          | 3.94   | 3.87   | 3.84   | 4.07   | 4.03   | 4.08   | 3.96   | 4.11   | 3.92   | 4.02   | 4.10   | 3.94   | 4.03   | 4.15   | 4.04   |
| H10      | 4.41  | 4.50                          | 4.46   | 4.78   | 4.79   | 4.55   | 4.52   | 4.85   | 4.80   | 4.57   | 4.83   | 4.48   | 4.47   | 4.84   | 4.57   | 4.63   | 4.45   |
| Me-12    | 1.3   | 1.29                          | 1.17   | 1.17   | 1.22   | 1.28   | 1.15   | 1.35   | 1.30   | 1.40   | 1.34   | 1.31   | 1.42   | 1.28   | 1.30   | 1.30   | 1.38   |
| Me-13    | 0.99  | 1.13                          | 1.08   | 1.15   | 1.19   | 1.26   | 1.11   | 1.17   | 1.18   | 1.13   | 1.25   | 1.20   | 1.14   | 1.23   | 1.11   | 1.27   | 1.16   |
| Me-15    | 1.96  | 2.04                          | 2.12   | 1.99   | 2.05   | 1.95   | 1.99   | 1.86   | 1.95   | 1.83   | 2.07   | 1.81   | 1.66   | 1.89   | 1.94   | 1.89   | 1.84   |
| Me-15    | 1.73  | 1.77                          | 1.77   | 1.77   | 1.77   | 1.75   | 1.75   | 1.69   | 1.71   | 1.67   | 1.78   | 1.81   | 1.67   | 1.75   | 1.79   | 1.74   | 1.78   |

**Table S1.1.2** – Experimental data of **1a** and scaled chemical shifts of **1a-1p** at the PCM/mPW1PW91/6-31+G\*\*// B3LYP/6-31G\* level of theory.

| DP4+     |       |               |        |        |        |        |        |        |        |        |        |        |        |        |        |        |        |
|----------|-------|---------------|--------|--------|--------|--------|--------|--------|--------|--------|--------|--------|--------|--------|--------|--------|--------|
| Compound | 1a    | 1b            | 1c     | 1d     | 1e     | 1f     | 1g     | 1h     | 1i     | 1j     | 1k     | 1l     | 1m     | 1n     | 1o     | 1p     |        |
| Nuclei   | Exp   | Scaled shifts |        |        |        |        |        |        |        |        |        |        |        |        |        |        |        |
| C1       | 38.2  | 35.19         | 36.82  | 41.38  | 37.11  | 33.94  | 42.05  | 37.20  | 40.27  | 35.69  | 35.22  | 36.12  | 37.54  | 38.53  | 39.94  | 38.42  | 39.45  |
| C2       | 60.7  | 71.63         | 73.25  | 73.15  | 73.47  | 71.11  | 72.25  | 70.57  | 70.99  | 71.05  | 71.16  | 72.94  | 73.51  | 72.14  | 70.68  | 70.16  | 72.07  |
| C3       | 71.9  | 78.42         | 78.13  | 79.02  | 78.58  | 79.95  | 78.39  | 80.60  | 78.79  | 81.09  | 78.33  | 78.70  | 79.75  | 79.94  | 78.36  | 79.48  | 79.23  |
| C4       | 38.7  | 37.26         | 38.46  | 39.11  | 38.41  | 38.01  | 38.85  | 37.71  | 39.02  | 37.66  | 37.88  | 38.61  | 38.75  | 37.80  | 37.59  | 37.68  | 39.19  |
| C5       | 30.1  | 27.96         | 30.43  | 25.60  | 28.27  | 25.43  | 24.65  | 23.07  | 23.56  | 23.92  | 26.36  | 28.08  | 24.54  | 25.00  | 22.24  | 22.55  | 23.53  |
| C6       | 48.3  | 50.87         | 52.50  | 52.22  | 53.73  | 52.27  | 51.72  | 51.99  | 50.95  | 49.94  | 53.75  | 52.31  | 51.42  | 50.40  | 52.05  | 53.14  | 51.24  |
| C7       | 143.4 | 138.96        | 138.09 | 139.24 | 139.78 | 137.29 | 137.84 | 139.78 | 139.96 | 139.51 | 140.34 | 136.97 | 137.00 | 139.25 | 138.10 | 138.15 | 136.77 |
| C8       | 123.8 | 118.49        | 118.85 | 120.20 | 119.81 | 119.09 | 119.58 | 119.95 | 119.68 | 120.43 | 119.41 | 120.02 | 122.52 | 120.44 | 119.24 | 118.84 | 119.86 |
| C9       | 71.7  | 70.08         | 70.00  | 64.85  | 65.58  | 70.00  | 70.60  | 64.84  | 64.43  | 64.76  | 65.32  | 69.71  | 64.69  | 65.30  | 70.04  | 69.01  | 69.74  |
| C10      | 73.2  | 83.77         | 83.70  | 82.36  | 81.42  | 85.63  | 81.61  | 83.43  | 83.66  | 84.64  | 82.81  | 84.82  | 84.96  | 82.96  | 83.31  | 84.95  | 85.00  |
| C11      | 45.8  | 44.60         | 44.84  | 43.68  | 43.23  | 44.26  | 45.83  | 43.20  | 43.69  | 42.10  | 43.64  | 44.13  | 42.87  | 43.96  | 45.49  | 44.22  | 44.25  |

















|       |      |       |       |       |       |       |       |       |       |       |       |       |       |       |       |       |       |
|-------|------|-------|-------|-------|-------|-------|-------|-------|-------|-------|-------|-------|-------|-------|-------|-------|-------|
| H5b   | 1.62 | 30.30 | 30.25 | 30.11 | 30.29 | 30.26 | 30.21 | 29.90 | 30.14 | 30.31 | 30.54 | 30.12 | 30.11 | 30.01 | 30.38 | 30.13 | 30.06 |
| H5a   | 2.51 | 29.45 | 29.65 | 30.00 | 29.65 | 29.87 | 30.06 | 29.41 | 29.76 | 30.03 | 29.45 | 30.09 | 30.03 | 29.70 | 29.75 | 29.33 | 29.77 |
| H8    | 5.41 | 25.92 | 25.88 | 25.83 | 25.77 | 25.91 | 25.95 | 25.80 | 25.82 | 25.84 | 25.79 | 25.83 | 25.87 | 25.78 | 25.94 | 25.87 | 25.89 |
| H9    | 4.28 | 27.55 | 27.54 | 27.66 | 27.56 | 27.49 | 27.46 | 27.57 | 27.57 | 27.63 | 27.62 | 27.51 | 27.54 | 27.55 | 27.51 | 27.46 | 27.50 |
| H10   | 4.41 | 27.16 | 27.11 | 26.77 | 26.67 | 27.18 | 27.23 | 26.59 | 26.72 | 26.78 | 26.72 | 27.14 | 26.81 | 26.66 | 27.19 | 27.02 | 27.18 |
| Me-12 | 1.30 | 30.54 | 30.60 | 30.63 | 30.62 | 30.53 | 30.64 | 30.46 | 30.50 | 30.50 | 30.58 | 30.45 | 30.36 | 30.53 | 30.55 | 30.52 | 30.43 |
| Me-13 | 0.99 | 30.75 | 30.75 | 30.64 | 30.63 | 30.61 | 30.66 | 30.58 | 30.70 | 30.60 | 30.70 | 30.63 | 30.44 | 30.54 | 30.72 | 30.61 | 30.71 |
| Me-14 | 1.96 | 29.72 | 29.59 | 29.68 | 29.62 | 29.82 | 29.69 | 29.82 | 29.74 | 29.87 | 29.72 | 29.91 | 29.94 | 29.88 | 29.82 | 29.85 | 29.92 |
| Me-15 | 1.73 | 29.94 | 30.00 | 30.01 | 30.01 | 30.01 | 30.03 | 30.02 | 30.03 | 30.04 | 30.01 | 29.90 | 29.93 | 29.98 | 29.95 | 30.02 | 29.97 |

**Table S1.4.2** – Experimental data of **1a** and scaled chemical shifts of **1a-1p** at the PCM/mPW1PW91/6-311+G\*\*// B3LYP/6-31G\* level of theory.

|          |       | DP4+          |        |        |        |        |        |        |        |        |        |        |        |        |        |        |        |
|----------|-------|---------------|--------|--------|--------|--------|--------|--------|--------|--------|--------|--------|--------|--------|--------|--------|--------|
| Compound |       | 1a            | 1b     | 1c     | 1d     | 1e     | 1f     | 1g     | 1h     | 1i     | 1j     | 1k     | 1l     | 1m     | 1n     | 1o     | 1p     |
| Nuclei   | Exp   | Scaled shifts |        |        |        |        |        |        |        |        |        |        |        |        |        |        |        |
| C1       | 38.2  | 35.53         | 37.42  | 42.64  | 38.74  | 35.67  | 42.86  | 36.61  | 40.75  | 36.16  | 36.66  | 37.19  | 37.81  | 37.61  | 41.08  | 37.58  | 38.27  |
| C2       | 60.7  | 70.17         | 72.23  | 72.33  | 72.87  | 70.44  | 71.53  | 69.72  | 70.69  | 70.68  | 70.91  | 72.86  | 72.74  | 72.03  | 69.58  | 69.17  | 71.79  |
| C3       | 71.9  | 78.29         | 78.13  | 78.02  | 78.53  | 78.89  | 77.59  | 79.76  | 78.71  | 79.46  | 78.48  | 78.35  | 78.78  | 79.10  | 78.21  | 79.42  | 78.78  |
| C4       | 38.7  | 37.93         | 39.25  | 39.70  | 39.63  | 37.88  | 39.47  | 38.66  | 38.26  | 38.38  | 37.93  | 39.29  | 39.57  | 39.90  | 38.20  | 38.94  | 40.23  |
| C5       | 30.1  | 29.28         | 31.37  | 27.37  | 31.58  | 26.60  | 26.44  | 24.79  | 24.75  | 25.31  | 29.62  | 28.51  | 27.74  | 26.30  | 24.11  | 24.13  | 25.43  |
| C6       | 48.3  | 50.59         | 50.46  | 50.90  | 50.88  | 52.32  | 50.60  | 51.86  | 50.94  | 52.12  | 51.10  | 51.99  | 51.14  | 50.90  | 50.77  | 51.88  | 51.04  |
| C7       | 143.4 | 139.43        | 139.19 | 140.60 | 140.57 | 138.89 | 139.09 | 140.37 | 140.39 | 140.71 | 141.02 | 137.45 | 139.64 | 139.17 | 139.42 | 138.01 | 137.18 |
| C8       | 123.8 | 119.24        | 118.87 | 119.93 | 119.77 | 119.50 | 119.02 | 120.25 | 120.37 | 120.04 | 119.75 | 120.68 | 121.48 | 120.93 | 119.02 | 120.27 | 120.95 |
| C9       | 71.7  | 68.18         | 68.54  | 63.11  | 62.77  | 67.27  | 68.30  | 63.34  | 63.17  | 63.02  | 62.96  | 67.52  | 62.88  | 63.39  | 68.25  | 67.53  | 68.00  |
| C10      | 73.2  | 82.93         | 82.66  | 82.23  | 82.73  | 84.46  | 82.98  | 83.71  | 82.29  | 83.16  | 82.90  | 84.33  | 82.71  | 83.96  | 82.78  | 85.09  | 83.46  |
| C11      | 45.8  | 46.16         | 46.15  | 44.53  | 44.48  | 44.25  | 46.05  | 43.25  | 44.18  | 43.54  | 44.24  | 44.39  | 43.57  | 44.02  | 46.03  | 43.78  | 45.06  |
| C12      | 25.3  | 21.73         | 21.20  | 21.65  | 21.28  | 25.39  | 21.40  | 24.60  | 21.68  | 25.04  | 21.59  | 25.81  | 25.26  | 23.56  | 21.86  | 24.80  | 23.79  |
| C13      | 18.1  | 14.90         | 15.29  | 17.65  | 17.33  | 17.12  | 15.98  | 20.80  | 17.03  | 20.91  | 16.72  | 17.22  | 21.51  | 19.79  | 15.53  | 17.42  | 16.51  |
| C14      | 25.6  | 24.30         | 24.58  | 25.14  | 24.66  | 19.74  | 24.25  | 20.40  | 24.85  | 19.93  | 24.35  | 20.05  | 20.32  | 21.08  | 23.30  | 20.21  | 21.00  |
| C15      | 33.0  | 29.15         | 22.46  | 22.00  | 21.98  | 29.38  | 22.25  | 29.67  | 29.72  | 29.35  | 29.58  | 22.17  | 22.66  | 26.07  | 29.65  | 29.57  | 26.30  |
| H1a      | 2.43  | 2.17          | 2.12   | 2.33   | 2.12   | 2.53   | 2.42   | 2.17   | 2.66   | 2.42   | 2.13   | 2.31   | 2.60   | 2.01   | 2.63   | 2.26   | 2.05   |
| H1b      | 2.09  | 2.03          | 1.99   | 1.89   | 1.96   | 2.17   | 2.06   | 1.95   | 1.81   | 2.38   | 2.03   | 2.25   | 2.13   | 1.78   | 1.95   | 2.04   | 1.91   |
| H2       | 4.57  | 4.65          | 4.86   | 4.67   | 4.78   | 4.55   | 4.74   | 4.33   | 4.44   | 4.50   | 4.79   | 4.77   | 4.61   | 4.50   | 4.43   | 4.78   | 4.78   |
| H4a      | 2.19  | 2.06          | 2.25   | 2.25   | 2.19   | 2.03   | 2.28   | 2.00   | 2.16   | 1.99   | 2.02   | 2.15   | 2.09   | 2.22   | 2.12   | 2.01   | 2.25   |
| H4b      | 1.93  | 2.16          | 2.37   | 2.53   | 2.38   | 2.03   | 2.52   | 2.06   | 2.21   | 2.03   | 2.04   | 2.41   | 2.34   | 2.35   | 2.21   | 2.10   | 2.38   |
| H5a      | 2.51  | 1.55          | 1.56   | 1.67   | 1.52   | 1.57   | 1.57   | 1.86   | 1.64   | 1.54   | 1.40   | 1.63   | 1.59   | 1.77   | 1.46   | 1.66   | 1.73   |
| H5b      | 1.62  | 2.32          | 2.10   | 1.77   | 2.08   | 1.94   | 1.71   | 2.30   | 1.99   | 1.80   | 2.37   | 1.66   | 1.67   | 2.05   | 2.40   | 2.00   | 2.00   |
| H8       | 5.41  | 5.58          | 5.50   | 5.55   | 5.46   | 5.64   | 5.54   | 5.62   | 5.58   | 5.61   | 5.58   | 5.60   | 5.51   | 5.57   | 5.62   | 5.62   | 5.59   |
| H9       | 4.28  | 4.07          | 4.01   | 3.89   | 3.91   | 4.16   | 4.14   | 3.99   | 3.98   | 3.99   | 3.97   | 4.05   | 3.96   | 3.97   | 4.15   | 4.14   | 4.10   |
| H10      | 4.41  | 4.44          | 4.39   | 4.70   | 4.68   | 4.45   | 4.35   | 4.90   | 4.75   | 4.76   | 4.76   | 4.39   | 4.64   | 4.77   | 4.45   | 4.55   | 4.39   |
| Me-12    | 1.3   | 1.32          | 1.24   | 1.19   | 1.24   | 1.32   | 1.16   | 1.34   | 1.31   | 1.37   | 1.37   | 1.33   | 1.35   | 1.31   | 1.30   | 1.30   | 1.40   |
| Me-13    | 0.99  | 1.12          | 1.10   | 1.18   | 1.23   | 1.24   | 1.15   | 1.23   | 1.13   | 1.28   | 1.26   | 1.16   | 1.28   | 1.30   | 1.15   | 1.21   | 1.14   |
| Me-14    | 1.96  | 2.08          | 2.15   | 2.05   | 2.11   | 1.98   | 2.05   | 1.93   | 2.01   | 1.95   | 2.12   | 1.83   | 1.74   | 1.89   | 1.98   | 1.92   | 1.87   |
| Me-15    | 1.73  | 1.88          | 1.78   | 1.75   | 1.77   | 1.81   | 1.74   | 1.74   | 1.74   | 1.79   | 1.87   | 1.84   | 1.76   | 1.80   | 1.86   | 1.76   | 1.82   |

## 2. Isomers of 2

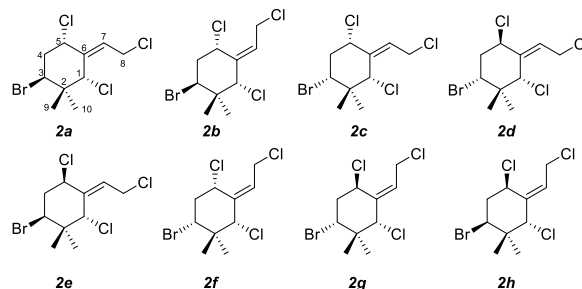

C. R. Kaiser, L. F. Pitombo, A. C. Pinto, *Magn. Reson. Chem.* **2001**, 39, 147–149.

**Table S2.1.1** – Experimental data of **2a-b** and calculated isotropic shielding constants of **2a-2h** at the PCM/mPW1PW91/6-31+G\*\*// B3LYP/6-31G\* level of theory.

|          |        | DP4+   |                               |    |    |    |    |    |    |
|----------|--------|--------|-------------------------------|----|----|----|----|----|----|
| Compound |        | 2a     | 2b                            | 2c | 2d | 2e | 2f | 2g | 2h |
| Nuclei   | Exp 2a | Exp 2b | Isotropic shielding constants |    |    |    |    |    |    |



|       |        |        |        |        |        |        |        |        |        |        |
|-------|--------|--------|--------|--------|--------|--------|--------|--------|--------|--------|
| C8    | 37.73  | 37.62  | 150.42 | 150.57 | 150.37 | 150.46 | 150.75 | 150.66 | 150.87 | 150.32 |
| C7    | 131.67 | 131.89 | 61.62  | 61.94  | 63.85  | 71.16  | 70.27  | 62.75  | 69.53  | 68.98  |
| C6    | 138.22 | 137.83 | 57.00  | 56.82  | 55.80  | 54.49  | 56.75  | 54.92  | 55.84  | 55.09  |
| C5    | 59.58  | 50.44  | 128.08 | 137.47 | 131.53 | 131.21 | 130.65 | 140.49 | 132.38 | 135.22 |
| C4    | 41.8   | 41.32  | 152.57 | 153.13 | 154.87 | 151.24 | 151.25 | 155.62 | 153.12 | 154.64 |
| C3    | 52.72  | 52.7   | 127.30 | 127.30 | 129.04 | 123.87 | 126.74 | 129.25 | 124.61 | 123.51 |
| C2    | 41.03  | 41.36  | 150.61 | 150.47 | 151.79 | 151.09 | 150.05 | 152.10 | 145.77 | 147.84 |
| C1    | 60.65  | 69.98  | 126.79 | 117.13 | 129.53 | 125.90 | 122.58 | 121.66 | 119.56 | 120.14 |
| C9    | 28.6   | 28.53  | 167.88 | 167.58 | 166.48 | 167.33 | 169.35 | 166.81 | 167.89 | 167.64 |
| C10   | 20.63  | 20.47  | 174.89 | 174.62 | 168.51 | 167.79 | 174.33 | 167.06 | 181.11 | 173.81 |
| H8a   | 4.16   | 4.18   | 27.35  | 27.33  | 27.20  | 27.35  | 27.40  | 27.26  | 27.37  | 27.23  |
| H8b   | 4.02   | 4.04   | 27.43  | 27.45  | 27.39  | 27.38  | 27.45  | 27.33  | 27.44  | 27.28  |
| H7    | 6.03   | 5.95   | 25.30  | 25.31  | 25.23  | 25.16  | 25.21  | 25.26  | 25.08  | 25.18  |
| H5    | 4.65   | 4.97   | 26.81  | 26.47  | 26.91  | 26.02  | 26.39  | 26.54  | 26.25  | 26.28  |
| H4a   | 2.65   | 2.68   | 29.01  | 29.02  | 28.85  | 29.03  | 28.98  | 28.85  | 29.08  | 28.87  |
| H4b   | 2.5    | 2.53   | 29.10  | 29.03  | 29.00  | 29.10  | 29.18  | 28.86  | 29.10  | 29.06  |
| H3    | 4.83   | 4.83   | 26.37  | 26.32  | 27.20  | 27.05  | 26.73  | 27.15  | 26.71  | 27.00  |
| H1    | 4.73   | 4.38   | 26.71  | 27.10  | 26.92  | 26.72  | 26.58  | 27.22  | 26.54  | 26.23  |
| Me-9  | 1.33   | 1.28   | 30.28  | 30.32  | 30.15  | 30.20  | 30.32  | 30.13  | 30.19  | 30.29  |
| Me-10 | 1.02   | 1.01   | 30.52  | 30.54  | 30.54  | 30.50  | 30.46  | 30.56  | 30.51  | 30.58  |

**Table S2a.1.2** – Experimental data of **2a** and scaled chemical shifts of **2a-2h** at the PCM/mPW1PW91/6-31+G\*\*// B3LYP/6-31G\* level of theory

| Compound |        | DP4+   |        |        |        |        |        |        |        |
|----------|--------|--------|--------|--------|--------|--------|--------|--------|--------|
| Nuclei   | Exp 2a | 2a     | 2b     | 2c     | 2d     | 2e     | 2f     | 2g     | 2h     |
| C8       | 37.73  | 40.26  | 40.08  | 40.38  | 38.70  | 39.62  | 40.24  | 39.71  | 39.69  |
| C7       | 131.67 | 130.34 | 130.04 | 129.84 | 123.89 | 124.69 | 130.28 | 124.00 | 124.88 |
| C6       | 138.22 | 135.03 | 135.24 | 138.17 | 141.79 | 138.98 | 138.31 | 138.18 | 139.43 |
| C5       | 59.58  | 62.92  | 53.38  | 59.86  | 59.38  | 60.86  | 50.65  | 58.87  | 55.50  |
| C4       | 41.8   | 38.08  | 37.48  | 35.73  | 37.86  | 39.09  | 35.16  | 37.38  | 35.16  |
| C3       | 52.72  | 63.71  | 63.70  | 62.44  | 67.26  | 65.00  | 62.17  | 66.92  | 67.77  |
| C2       | 41.03  | 40.07  | 40.18  | 38.92  | 38.02  | 40.35  | 38.76  | 44.99  | 42.29  |
| C1       | 60.65  | 64.24  | 74.02  | 61.94  | 65.08  | 69.39  | 69.94  | 72.16  | 71.29  |
| C9       | 28.6   | 22.55  | 22.82  | 23.73  | 20.58  | 19.95  | 23.69  | 22.07  | 21.54  |
| C10      | 20.63  | 15.44  | 15.68  | 21.62  | 20.08  | 14.70  | 23.44  | 8.37   | 15.08  |
| H8a      | 4.16   | 4.10   | 4.12   | 4.33   | 4.06   | 4.03   | 4.25   | 4.01   | 4.11   |
| H8b      | 4.02   | 4.02   | 4.00   | 4.14   | 4.03   | 3.99   | 4.19   | 3.95   | 4.07   |
| H7       | 6.03   | 6.02   | 6.01   | 6.31   | 6.11   | 6.07   | 6.27   | 6.11   | 5.99   |
| H5       | 4.65   | 4.60   | 4.93   | 4.63   | 5.30   | 4.97   | 4.98   | 5.04   | 4.98   |
| H4a      | 2.65   | 2.53   | 2.52   | 2.68   | 2.49   | 2.56   | 2.65   | 2.44   | 2.62   |
| H4b      | 2.5    | 2.45   | 2.52   | 2.53   | 2.42   | 2.37   | 2.64   | 2.43   | 2.44   |
| H3       | 4.83   | 5.02   | 5.07   | 4.33   | 4.34   | 4.65   | 4.36   | 4.62   | 4.32   |
| H1       | 4.73   | 4.70   | 4.34   | 4.61   | 4.65   | 4.79   | 4.29   | 4.77   | 5.02   |
| Me-9     | 1.33   | 1.34   | 1.31   | 1.37   | 1.40   | 1.32   | 1.36   | 1.43   | 1.32   |
| Me-10    | 1.02   | 1.12   | 1.10   | 0.98   | 1.11   | 1.19   | 0.93   | 1.14   | 1.05   |

**Table S2b.1.2** – Experimental data of **2b** and scaled chemical shifts of **2a-2h** at the PCM/mPW1PW91/6-31+G\*\*// B3LYP/6-31G\* level of theory

| Compound |        | DP4+   |        |        |        |        |        |        |        |
|----------|--------|--------|--------|--------|--------|--------|--------|--------|--------|
| Nuclei   | Exp 2b | 2a     | 2b     | 2c     | 2d     | 2e     | 2f     | 2g     | 2h     |
| C8       | 37.62  | 40.04  | 40.10  | 38.44  | 39.41  | 40.17  | 39.57  | 39.58  | 40.04  |
| C7       | 131.89 | 129.97 | 130.57 | 124.42 | 125.10 | 130.28 | 124.21 | 125.00 | 129.97 |
| C6       | 137.83 | 135.17 | 138.98 | 142.49 | 139.50 | 138.31 | 138.45 | 139.59 | 135.17 |
| C5       | 50.44  | 53.33  | 59.79  | 59.31  | 60.81  | 50.60  | 58.81  | 55.44  | 53.33  |
| C4       | 41.32  | 37.44  | 35.40  | 37.59  | 38.88  | 35.09  | 37.23  | 35.04  | 37.44  |
| C3       | 52.7   | 63.65  | 62.40  | 67.27  | 64.98  | 62.12  | 66.89  | 67.74  | 63.65  |
| C2       | 41.36  | 40.14  | 38.62  | 37.75  | 40.15  | 38.70  | 44.87  | 42.19  | 40.14  |
| C1       | 69.98  | 73.97  | 61.89  | 65.07  | 69.40  | 69.90  | 72.15  | 71.27  | 73.97  |
| C9       | 28.53  | 22.78  | 23.26  | 20.15  | 19.60  | 23.61  | 21.86  | 21.39  | 22.78  |
| C10      | 20.47  | 15.64  | 21.13  | 19.65  | 14.31  | 23.36  | 8.10   | 14.91  | 15.64  |
| H8a      | 4.18   | 4.11   | 4.33   | 4.05   | 4.02   | 4.24   | 4.00   | 4.11   | 4.11   |
| H8b      | 4.04   | 3.99   | 4.14   | 4.02   | 3.98   | 4.18   | 3.94   | 4.06   | 3.99   |
| H7       | 5.95   | 5.99   | 6.31   | 6.09   | 6.06   | 6.24   | 6.10   | 5.99   | 5.99   |
| H5       | 4.97   | 4.91   | 4.62   | 5.29   | 4.96   | 4.96   | 5.03   | 4.98   | 4.91   |

|       |      |      |      |      |      |      |      |      |      |
|-------|------|------|------|------|------|------|------|------|------|
| H4a   | 2.68 | 2.52 | 2.67 | 2.49 | 2.55 | 2.65 | 2.44 | 2.61 | 2.52 |
| H4b   | 2.53 | 2.52 | 2.52 | 2.42 | 2.36 | 2.64 | 2.42 | 2.43 | 2.52 |
| H3    | 4.83 | 5.05 | 4.33 | 4.33 | 4.64 | 4.35 | 4.61 | 4.32 | 5.05 |
| H1    | 4.38 | 4.32 | 4.61 | 4.63 | 4.78 | 4.28 | 4.76 | 5.02 | 4.32 |
| Me-9  | 1.28 | 1.32 | 1.36 | 1.40 | 1.31 | 1.37 | 1.42 | 1.30 | 1.32 |
| Me-10 | 1.01 | 1.11 | 0.97 | 1.12 | 1.18 | 0.94 | 1.13 | 1.04 | 1.11 |

**Table S2a.1.3** – Experimental data of **2a** and scaled chemical shifts of **2a-2h** at the PCM/mPW1PW91/6-31+G\*\*// B3LYP/6-31G\* level of theory, after excluding all the signals adjacent to bromine.

| Compound |        | DP4+          |        |        |        |        |        |        |        |
|----------|--------|---------------|--------|--------|--------|--------|--------|--------|--------|
| Nuclei   | Exp 2a | 2a            | 2b     | 2c     | 2d     | 2e     | 2f     | 2g     | 2h     |
|          |        | Scaled shifts |        |        |        |        |        |        |        |
| C8       | 37.73  | 41.62         | 41.45  | 41.59  | 40.51  | 41.15  | 41.41  | 41.47  | 41.56  |
| C7       | 131.67 | 131.08        | 130.78 | 130.50 | 124.93 | 125.56 | 130.92 | 125.01 | 125.94 |
| C6       | 138.22 | 135.73        | 135.94 | 138.77 | 142.66 | 139.74 | 138.89 | 139.06 | 140.35 |
| C5       | 59.58  | 64.13         | 54.65  | 60.95  | 61.00  | 62.23  | 51.76  | 60.46  | 57.22  |
| C4       | 41.8   | 39.46         | 38.87  | 36.97  | 39.68  | 40.62  | 36.36  | 39.17  | 37.07  |
| C2       | 41.03  | 41.43         | 41.55  | 40.14  | 39.84  | 41.88  | 39.95  | 46.71  | 44.13  |
| C1       | 60.65  | 65.43         | 75.15  | 63.01  | 66.66  | 70.69  | 70.94  | 73.63  | 72.86  |
| C9       | 28.6   | 24.04         | 24.31  | 25.04  | 22.56  | 21.64  | 24.96  | 23.99  | 23.58  |
| C10      | 20.63  | 16.97         | 17.21  | 22.95  | 22.06  | 16.42  | 24.71  | 10.42  | 17.18  |
| H8a      | 4.16   | 4.13          | 4.16   | 4.25   | 3.99   | 4.00   | 4.18   | 3.98   | 4.04   |
| H8b      | 4.02   | 4.05          | 4.04   | 4.07   | 3.97   | 3.96   | 4.12   | 3.92   | 3.99   |
| H7       | 6.03   | 6.08          | 6.08   | 6.17   | 5.98   | 6.02   | 6.14   | 6.05   | 5.86   |
| H5       | 4.65   | 4.64          | 4.98   | 4.54   | 5.20   | 4.93   | 4.89   | 4.99   | 4.88   |
| H4a      | 2.65   | 2.55          | 2.54   | 2.65   | 2.46   | 2.55   | 2.62   | 2.43   | 2.59   |
| H4b      | 2.5    | 2.46          | 2.53   | 2.50   | 2.40   | 2.36   | 2.62   | 2.42   | 2.41   |
| H1       | 4.73   | 4.74          | 4.37   | 4.53   | 4.56   | 4.75   | 4.22   | 4.73   | 4.92   |
| Me-9     | 1.33   | 1.34          | 1.31   | 1.38   | 1.40   | 1.32   | 1.37   | 1.43   | 1.33   |
| Me-10    | 1.02   | 1.11          | 1.09   | 1.00   | 1.13   | 1.19   | 0.95   | 1.15   | 1.07   |

**Table S2b.1.3** – Experimental data of **2b** and scaled chemical shifts of **2a-2h** at the PCM/mPW1PW91/6-31+G\*\*// B3LYP/6-31G\* level of theory, after excluding all the signals adjacent to bromine.

| Compound |        | DP4+          |        |        |        |        |        |        |        |
|----------|--------|---------------|--------|--------|--------|--------|--------|--------|--------|
| Nuclei   | Exp 2b | 2a            | 2b     | 2c     | 2d     | 2e     | 2f     | 2g     | 2h     |
|          |        | Scaled shifts |        |        |        |        |        |        |        |
| C8       | 37.62  | 41.33         | 41.40  | 41.30  | 40.26  | 40.94  | 41.34  | 41.33  | 41.45  |
| C7       | 131.89 | 131.84        | 130.72 | 131.23 | 125.46 | 125.97 | 130.92 | 125.22 | 126.07 |
| C6       | 137.83 | 136.54        | 135.88 | 139.59 | 143.37 | 140.27 | 138.91 | 139.34 | 140.52 |
| C5       | 50.44  | 64.10         | 54.60  | 60.88  | 60.94  | 62.17  | 51.70  | 60.40  | 57.16  |
| C4       | 41.32  | 39.14         | 38.82  | 36.63  | 39.42  | 40.41  | 36.29  | 39.01  | 36.95  |
| C2       | 41.36  | 41.14         | 41.50  | 39.83  | 39.58  | 41.67  | 39.88  | 46.59  | 44.03  |
| C1       | 69.98  | 65.42         | 75.10  | 62.97  | 66.65  | 70.70  | 70.89  | 73.63  | 72.84  |
| C9       | 28.53  | 23.54         | 24.26  | 24.56  | 22.13  | 21.28  | 24.88  | 23.77  | 23.42  |
| C10      | 20.47  | 16.39         | 17.16  | 22.45  | 21.64  | 16.02  | 24.63  | 10.14  | 17.00  |
| H8a      | 4.18   | 4.13          | 4.14   | 4.25   | 3.98   | 4.00   | 4.17   | 3.97   | 4.03   |
| H8b      | 4.04   | 4.04          | 4.02   | 4.06   | 3.95   | 3.95   | 4.10   | 3.91   | 3.99   |
| H7       | 5.95   | 6.08          | 6.05   | 6.17   | 5.96   | 6.01   | 6.11   | 6.04   | 5.86   |
| H5       | 4.97   | 4.64          | 4.96   | 4.53   | 5.18   | 4.92   | 4.87   | 4.98   | 4.88   |
| H4a      | 2.68   | 2.53          | 2.54   | 2.64   | 2.46   | 2.54   | 2.62   | 2.43   | 2.58   |
| H4b      | 2.53   | 2.45          | 2.53   | 2.49   | 2.40   | 2.36   | 2.61   | 2.41   | 2.40   |
| H1       | 4.38   | 4.74          | 4.36   | 4.52   | 4.55   | 4.75   | 4.20   | 4.72   | 4.92   |
| Me-9     | 1.28   | 1.32          | 1.31   | 1.37   | 1.41   | 1.31   | 1.38   | 1.42   | 1.31   |
| Me-10    | 1.01   | 1.09          | 1.10   | 0.99   | 1.13   | 1.19   | 0.96   | 1.14   | 1.05   |

**Table S2a.1.4**– Experimental data of **2a** and scaled chemical shifts of **2a-2h** at the PCM/mPW1PW91/6-31+G\*\*// B3LYP/6-31G\* level of theory, after excluding all the signals adjacent to bromine and chlorine.

| DP4+     |        |               |        |        |        |        |        |        |        |
|----------|--------|---------------|--------|--------|--------|--------|--------|--------|--------|
| Compound |        | 2a            | 2b     | 2c     | 2d     | 2e     | 2f     | 2g     | 2h     |
| Nuclei   | Exp 2a | Scaled shifts |        |        |        |        |        |        |        |
| C7       | 131.67 | 132.37        | 132.14 | 131.05 | 126.01 | 127.37 | 131.33 | 127.00 | 127.40 |
| C6       | 138.22 | 136.96        | 137.25 | 139.24 | 143.59 | 141.38 | 139.24 | 140.86 | 141.63 |
| C4       | 41.8   | 41.89         | 41.29  | 38.42  | 41.52  | 43.51  | 37.53  | 42.35  | 39.59  |
| C2       | 41.03  | 43.84         | 43.94  | 41.56  | 41.67  | 44.75  | 41.09  | 49.79  | 46.57  |
| C9       | 28.6   | 26.66         | 26.90  | 26.60  | 24.55  | 24.77  | 26.23  | 27.39  | 26.27  |
| C10      | 20.63  | 19.68         | 19.88  | 24.53  | 24.06  | 19.61  | 25.98  | 14.00  | 19.94  |
| H7       | 6.03   | 6.02          | 6.01   | 5.99   | 6.05   | 6.04   | 5.97   | 6.06   | 5.99   |
| H4a      | 2.65   | 2.53          | 2.52   | 2.60   | 2.48   | 2.55   | 2.58   | 2.43   | 2.62   |
| H4b      | 2.5    | 2.45          | 2.52   | 2.46   | 2.41   | 2.36   | 2.57   | 2.41   | 2.45   |
| Me-9     | 1.33   | 1.34          | 1.31   | 1.38   | 1.40   | 1.31   | 1.37   | 1.42   | 1.33   |
| Me-10    | 1.02   | 1.11          | 1.10   | 1.01   | 1.12   | 1.18   | 0.96   | 1.13   | 1.06   |

**Table S2b.1.4**– Experimental data of **2b** and scaled chemical shifts of **2a-2h** at the PCM/mPW1PW91/6-31+G\*\*// B3LYP/6-31G\* level of theory, after excluding all the signals adjacent to bromine and chlorine.

| DP4+     |        |               |        |        |        |        |        |        |        |
|----------|--------|---------------|--------|--------|--------|--------|--------|--------|--------|
| Compound |        | 2a            | 2b     | 2c     | 2d     | 2e     | 2f     | 2g     | 2h     |
| Nuclei   | Exp 2b | Scaled shifts |        |        |        |        |        |        |        |
| C7       | 131.89 | 131.05        | 126.01 | 127.37 | 131.33 | 127.00 | 127.40 | 131.05 | 126.01 |
| C6       | 137.83 | 139.24        | 143.59 | 141.38 | 139.24 | 140.86 | 141.63 | 139.24 | 143.59 |
| C4       | 41.32  | 38.42         | 41.52  | 43.51  | 37.53  | 42.35  | 39.59  | 38.42  | 41.52  |
| C2       | 41.36  | 41.56         | 41.67  | 44.75  | 41.09  | 49.79  | 46.57  | 41.56  | 41.67  |
| C9       | 28.53  | 26.60         | 24.55  | 24.77  | 26.23  | 27.39  | 26.27  | 26.60  | 24.55  |
| C10      | 20.47  | 24.53         | 24.06  | 19.61  | 25.98  | 14.00  | 19.94  | 24.53  | 24.06  |
| H7       | 5.95   | 5.99          | 6.05   | 6.04   | 5.97   | 6.06   | 5.99   | 5.99   | 6.05   |
| H4a      | 2.68   | 2.60          | 2.48   | 2.55   | 2.58   | 2.43   | 2.62   | 2.60   | 2.48   |
| H4b      | 2.53   | 2.46          | 2.41   | 2.36   | 2.57   | 2.41   | 2.45   | 2.46   | 2.41   |
| Me-9     | 1.28   | 1.38          | 1.40   | 1.31   | 1.37   | 1.42   | 1.33   | 1.38   | 1.40   |
| Me-10    | 1.01   | 1.01          | 1.12   | 1.18   | 0.96   | 1.13   | 1.06   | 1.01   | 1.12   |

**Table S2a.1.5** – Experimental data of **2a** and scaled chemical shifts of **2a-2h** at the PCM/mPW1PW91/6-31+G\*\*// B3LYP/6-31G\* level of theory, after excluding all the carbon signals adjacent to bromine and chlorine.

| DP4+     |        |               |        |        |        |        |        |        |        |
|----------|--------|---------------|--------|--------|--------|--------|--------|--------|--------|
| Compound |        | 2a            | 2b     | 2c     | 2d     | 2e     | 2f     | 2g     | 2h     |
| Nuclei   | Exp 2a | Scaled shifts |        |        |        |        |        |        |        |
| C7       | 131.67 | 132.14        | 131.05 | 126.01 | 127.37 | 131.33 | 127.00 | 127.40 | 132.14 |
| C6       | 138.22 | 137.25        | 139.24 | 143.59 | 141.38 | 139.24 | 140.86 | 141.63 | 137.25 |
| C4       | 41.8   | 41.29         | 38.42  | 41.52  | 43.51  | 37.53  | 42.35  | 39.59  | 41.29  |
| C2       | 41.03  | 43.94         | 41.56  | 41.67  | 44.75  | 41.09  | 49.79  | 46.57  | 43.94  |
| C9       | 28.6   | 26.90         | 26.60  | 24.55  | 24.77  | 26.23  | 27.39  | 26.27  | 26.90  |
| C10      | 20.63  | 19.88         | 24.53  | 24.06  | 19.61  | 25.98  | 14.00  | 19.94  | 19.88  |
| H8a      | 4.16   | 4.11          | 4.33   | 4.05   | 4.02   | 4.24   | 4.00   | 4.11   | 4.11   |
| H8b      | 4.02   | 3.99          | 4.14   | 4.02   | 3.98   | 4.18   | 3.94   | 4.06   | 3.99   |
| H7       | 6.03   | 5.99          | 6.31   | 6.09   | 6.06   | 6.24   | 6.10   | 5.99   | 5.99   |
| H5       | 4.65   | 4.91          | 4.62   | 5.29   | 4.96   | 4.96   | 5.03   | 4.98   | 4.91   |
| H4a      | 2.65   | 2.52          | 2.67   | 2.49   | 2.55   | 2.65   | 2.44   | 2.61   | 2.52   |
| H4b      | 2.5    | 2.52          | 2.52   | 2.42   | 2.36   | 2.64   | 2.42   | 2.43   | 2.52   |
| H3       | 4.83   | 5.05          | 4.33   | 4.33   | 4.64   | 4.35   | 4.61   | 4.32   | 5.05   |
| H1       | 4.73   | 4.32          | 4.61   | 4.63   | 4.78   | 4.28   | 4.76   | 5.02   | 4.32   |
| Me-9     | 1.33   | 1.32          | 1.36   | 1.40   | 1.31   | 1.37   | 1.42   | 1.30   | 1.32   |
| Me-10    | 1.02   | 1.11          | 0.97   | 1.12   | 1.18   | 0.94   | 1.13   | 1.04   | 1.11   |

**Table S2b.1.5** – Experimental data of **2b** and scaled chemical shifts of **2a-2h** at the PCM/mPW1PW91/6-31+G\*\*// B3LYP/6-31G\* level of theory, after excluding all the carbon signals adjacent to bromine and chlorine.

| DP4+     |        |               |        |        |        |        |        |        |        |
|----------|--------|---------------|--------|--------|--------|--------|--------|--------|--------|
| Compound |        | 2a            | 2b     | 2c     | 2d     | 2e     | 2f     | 2g     | 2h     |
| Nuclei   | Exp 2b | Scaled shifts |        |        |        |        |        |        |        |
| C7       | 131.89 | 132.37        | 132.14 | 131.05 | 126.01 | 127.37 | 131.33 | 127.00 | 127.40 |
| C6       | 137.83 | 136.96        | 137.25 | 139.24 | 143.59 | 141.38 | 139.24 | 140.86 | 141.63 |
| C4       | 41.32  | 41.89         | 41.29  | 38.42  | 41.52  | 43.51  | 37.53  | 42.35  | 39.59  |
| C2       | 41.36  | 43.84         | 43.94  | 41.56  | 41.67  | 44.75  | 41.09  | 49.79  | 46.57  |
| C9       | 28.53  | 26.66         | 26.90  | 26.60  | 24.55  | 24.77  | 26.23  | 27.39  | 26.27  |
| C10      | 20.47  | 19.68         | 19.88  | 24.53  | 24.06  | 19.61  | 25.98  | 14.00  | 19.94  |
| H8a      | 4.18   | 4.10          | 4.11   | 4.33   | 4.05   | 4.02   | 4.24   | 4.00   | 4.11   |
| H8b      | 4.04   | 4.02          | 3.99   | 4.14   | 4.02   | 3.98   | 4.18   | 3.94   | 4.06   |
| H7       | 5.95   | 6.03          | 5.99   | 6.31   | 6.09   | 6.06   | 6.24   | 6.10   | 5.99   |
| H5       | 4.97   | 4.60          | 4.91   | 4.62   | 5.29   | 4.96   | 4.96   | 5.03   | 4.98   |
| H4a      | 2.68   | 2.52          | 2.52   | 2.67   | 2.49   | 2.55   | 2.65   | 2.44   | 2.61   |
| H4b      | 2.53   | 2.44          | 2.52   | 2.52   | 2.42   | 2.36   | 2.64   | 2.42   | 2.43   |
| H3       | 4.83   | 5.02          | 5.05   | 4.33   | 4.33   | 4.64   | 4.35   | 4.61   | 4.32   |
| H1       | 4.38   | 4.70          | 4.32   | 4.61   | 4.63   | 4.78   | 4.28   | 4.76   | 5.02   |
| Me-9     | 1.28   | 1.32          | 1.32   | 1.36   | 1.40   | 1.31   | 1.37   | 1.42   | 1.30   |
| Me-10    | 1.01   | 1.10          | 1.11   | 0.97   | 1.12   | 1.18   | 0.94   | 1.13   | 1.04   |

**Table S2.2.1** – Experimental data of **2a-b** and calculated isotropic shielding constants of **2a-2h** at the B3LYP/6-31G\*\*//MMFF level of theory.

| DP4      |        |        |                               |        |        |        |        |        |        |        |
|----------|--------|--------|-------------------------------|--------|--------|--------|--------|--------|--------|--------|
| Compound |        |        | 2a                            | 2b     | 2c     | 2d     | 2e     | 2f     | 2g     | 2h     |
| Nuclei   | Exp 2a | Exp 2b | Isotropic shielding constants |        |        |        |        |        |        |        |
| C8       | 37.73  | 37.62  | 153.06                        | 153.03 | 147.59 | 151.76 | 153.74 | 147.94 | 153.53 | 149.69 |
| C7       | 131.67 | 131.89 | 63.08                         | 63.08  | 62.71  | 65.82  | 68.15  | 61.93  | 67.25  | 61.73  |
| C6       | 138.22 | 137.83 | 52.51                         | 52.70  | 56.88  | 51.87  | 50.80  | 57.63  | 50.75  | 54.81  |
| C5       | 59.58  | 50.44  | 131.74                        | 140.74 | 129.11 | 130.44 | 131.02 | 131.91 | 135.92 | 134.56 |
| C4       | 41.8   | 41.32  | 147.02                        | 147.37 | 143.25 | 145.46 | 144.85 | 144.37 | 147.54 | 145.88 |
| C3       | 52.72  | 52.7   | 129.25                        | 129.29 | 124.86 | 126.73 | 127.55 | 125.22 | 125.63 | 127.11 |
| C2       | 41.03  | 41.36  | 145.11                        | 144.95 | 141.73 | 144.63 | 144.71 | 142.01 | 140.97 | 144.31 |
| C1       | 60.65  | 69.98  | 127.47                        | 118.06 | 119.90 | 125.65 | 123.24 | 117.62 | 118.91 | 114.68 |
| C10      | 20.63  | 20.47  | 169.50                        | 169.70 | 175.02 | 166.80 | 168.97 | 174.18 | 175.92 | 166.93 |
| C9       | 28.6   | 28.53  | 162.69                        | 162.62 | 163.92 | 162.17 | 163.29 | 163.51 | 163.39 | 164.92 |
| H8b      | 4.02   | 4.04   | 28.06                         | 28.07  | 27.49  | 27.76  | 28.07  | 27.50  | 28.09  | 27.45  |
| H8a      | 4.16   | 4.18   | 27.86                         | 27.82  | 27.10  | 27.74  | 27.94  | 26.95  | 27.90  | 27.45  |
| H7       | 6.03   | 5.95   | 25.90                         | 25.93  | 25.57  | 25.61  | 25.46  | 25.58  | 25.41  | 25.79  |
| H5       | 4.65   | 4.97   | 27.44                         | 27.01  | 27.86  | 26.70  | 26.95  | 27.73  | 26.76  | 26.84  |
| H4b      | 2.5    | 2.53   | 29.38                         | 29.37  | 29.55  | 29.40  | 29.49  | 29.37  | 29.36  | 29.40  |
| H4a      | 2.65   | 2.68   | 29.32                         | 29.28  | 29.28  | 29.27  | 29.23  | 29.34  | 29.34  | 29.28  |
| H3       | 4.83   | 4.83   | 26.72                         | 26.72  | 27.94  | 27.44  | 27.20  | 27.92  | 27.14  | 27.31  |
| H1       | 4.73   | 4.38   | 27.21                         | 27.64  | 27.74  | 26.97  | 26.97  | 27.85  | 26.90  | 27.29  |
| Me-9     | 1.02   | 1.01   | 30.75                         | 30.78  | 30.58  | 30.60  | 30.61  | 30.68  | 30.73  | 30.62  |
| Me-10    | 1.33   | 1.28   | 30.47                         | 30.51  | 30.57  | 30.47  | 30.51  | 30.61  | 30.48  | 30.60  |

**Table S2a.2.2** – Experimental data of **2a** and scaled shifts of **2a-2h** at the B3LYP/6-31G\*\*//MMFF level of theory

| DP4      |        |               |        |        |        |        |        |        |        |
|----------|--------|---------------|--------|--------|--------|--------|--------|--------|--------|
| Compound |        | 2a            | 2b     | 2c     | 2d     | 2e     | 2f     | 2g     | 2h     |
| Nuclei   | Exp 2a | Scaled shifts |        |        |        |        |        |        |        |
| C8       | 37.73  | 35.19         | 35.55  | 38.70  | 34.84  | 33.48  | 38.54  | 34.81  | 36.78  |
| C7       | 131.67 | 129.15        | 128.36 | 129.29 | 126.88 | 124.41 | 130.08 | 123.97 | 129.31 |
| C6       | 138.22 | 140.19        | 139.07 | 135.51 | 141.81 | 142.84 | 134.65 | 141.02 | 136.59 |
| C5       | 59.58  | 57.46         | 48.23  | 58.43  | 57.68  | 57.61  | 55.60  | 53.01  | 52.69  |
| C4       | 41.8   | 41.50         | 41.39  | 43.34  | 41.58  | 42.93  | 42.34  | 41.00  | 40.79  |
| C3       | 52.72  | 60.05         | 60.04  | 62.96  | 61.64  | 61.30  | 62.72  | 63.65  | 60.53  |
| C2       | 41.03  | 43.49         | 43.89  | 44.96  | 42.48  | 43.07  | 44.85  | 47.79  | 42.44  |
| C1       | 60.65  | 61.92         | 71.63  | 68.25  | 62.80  | 65.88  | 70.81  | 70.59  | 73.61  |
| C9       | 20.63  | 18.03         | 18.34  | 9.43   | 18.74  | 17.29  | 10.61  | 11.68  | 18.65  |

|       |      |       |       |       |       |       |       |       |       |
|-------|------|-------|-------|-------|-------|-------|-------|-------|-------|
| C10   | 28.6 | 25.14 | 25.65 | 21.28 | 23.70 | 23.33 | 21.97 | 24.62 | 20.76 |
| H8a   | 4.02 | 3.85  | 3.83  | 4.53  | 4.02  | 3.76  | 4.49  | 3.70  | 4.34  |
| H8b   | 4.16 | 4.05  | 4.08  | 4.95  | 4.04  | 3.89  | 5.08  | 3.88  | 4.34  |
| H7    | 6.03 | 6.07  | 6.01  | 6.60  | 6.16  | 6.33  | 6.53  | 6.27  | 5.99  |
| H5    | 4.65 | 4.48  | 4.91  | 4.13  | 5.08  | 4.86  | 4.25  | 4.97  | 4.94  |
| H4a   | 2.5  | 2.48  | 2.51  | 2.31  | 2.39  | 2.35  | 2.50  | 2.49  | 2.39  |
| H4b   | 2.65 | 2.55  | 2.61  | 2.60  | 2.51  | 2.61  | 2.54  | 2.51  | 2.51  |
| H3    | 4.83 | 5.22  | 5.20  | 4.05  | 4.33  | 4.61  | 4.04  | 4.61  | 4.48  |
| H1    | 4.73 | 4.72  | 4.27  | 4.26  | 4.81  | 4.84  | 4.11  | 4.84  | 4.50  |
| Me-9  | 1.02 | 1.07  | 1.08  | 1.20  | 1.19  | 1.25  | 1.12  | 1.17  | 1.17  |
| Me-10 | 1.33 | 1.36  | 1.35  | 1.20  | 1.32  | 1.35  | 1.19  | 1.41  | 1.20  |

**Table S2b.2.2** – Experimental data of **2b** and scaled shifts of **2a-2h** at the B3LYP/6-31G\*\*//MMFF level of theory

| DP4      |        |               |        |        |        |        |        |        |        |
|----------|--------|---------------|--------|--------|--------|--------|--------|--------|--------|
| Compound |        | 2a            | 2b     | 2c     | 2d     | 2e     | 2f     | 2g     | 2h     |
| Nuclei   | Exp 2b | Scaled shifts |        |        |        |        |        |        |        |
| C8       | 37.62  | 35.19         | 35.55  | 38.70  | 34.84  | 33.48  | 38.54  | 34.81  | 36.78  |
| C7       | 131.89 | 129.15        | 128.36 | 129.29 | 126.88 | 124.41 | 130.08 | 123.97 | 129.31 |
| C6       | 137.83 | 140.19        | 139.07 | 135.51 | 141.81 | 142.84 | 134.65 | 141.02 | 136.59 |
| C5       | 50.44  | 57.46         | 48.23  | 58.43  | 57.68  | 57.61  | 55.60  | 53.01  | 52.69  |
| C4       | 41.32  | 41.50         | 41.39  | 43.34  | 41.58  | 42.93  | 42.34  | 41.00  | 40.79  |
| C3       | 52.7   | 60.05         | 60.04  | 62.96  | 61.64  | 61.30  | 62.72  | 63.65  | 60.53  |
| C2       | 41.36  | 43.49         | 43.89  | 44.96  | 42.48  | 43.07  | 44.85  | 47.79  | 42.44  |
| C1       | 69.98  | 61.92         | 71.63  | 68.25  | 62.80  | 65.88  | 70.81  | 70.59  | 73.61  |
| C9       | 28.53  | 18.03         | 18.34  | 9.43   | 18.74  | 17.29  | 10.61  | 11.68  | 18.65  |
| C10      | 20.47  | 25.14         | 25.65  | 21.28  | 23.70  | 23.33  | 21.97  | 24.62  | 20.76  |
| H8a      | 4.18   | 3.85          | 3.83   | 4.53   | 4.02   | 3.76   | 4.49   | 3.70   | 4.34   |
| H8b      | 4.04   | 4.05          | 4.08   | 4.95   | 4.04   | 3.89   | 5.08   | 3.88   | 4.34   |
| H7       | 5.95   | 6.07          | 6.01   | 6.60   | 6.16   | 6.33   | 6.53   | 6.27   | 5.99   |
| H5       | 4.97   | 4.48          | 4.91   | 4.13   | 5.08   | 4.86   | 4.25   | 4.97   | 4.94   |
| H4a      | 2.68   | 2.48          | 2.51   | 2.31   | 2.39   | 2.35   | 2.50   | 2.49   | 2.39   |
| H4b      | 2.53   | 2.55          | 2.61   | 2.60   | 2.51   | 2.61   | 2.54   | 2.51   | 2.51   |
| H3       | 4.83   | 5.22          | 5.20   | 4.05   | 4.33   | 4.61   | 4.04   | 4.61   | 4.48   |
| H1       | 4.38   | 4.72          | 4.27   | 4.26   | 4.81   | 4.84   | 4.11   | 4.84   | 4.50   |
| Me-9     | 1.28   | 1.07          | 1.08   | 1.20   | 1.19   | 1.25   | 1.12   | 1.17   | 1.17   |
| Me-10    | 1.01   | 1.36          | 1.35   | 1.20   | 1.32   | 1.35   | 1.19   | 1.41   | 1.20   |

**Table S2a.2.3** – Experimental data of **2a** and scaled chemical shifts of **2a-2h** at the B3LYP/6-31G\*\*//MMFF level of theory, after excluding all the signals adjacent to bromine.

| DP4      |        |               |        |        |        |        |        |        |        |
|----------|--------|---------------|--------|--------|--------|--------|--------|--------|--------|
| Compound |        | 2a            | 2b     | 2c     | 2d     | 2e     | 2f     | 2g     | 2h     |
| Nuclei   | Exp 2a | Scaled shifts |        |        |        |        |        |        |        |
| C8       | 37.73  | 36.13         | 36.48  | 39.98  | 35.98  | 34.58  | 39.79  | 36.21  | 37.77  |
| C7       | 131.67 | 129.66        | 128.87 | 129.99 | 127.50 | 125.03 | 130.76 | 124.76 | 129.84 |
| C6       | 138.22 | 140.65        | 139.53 | 136.18 | 142.35 | 143.36 | 135.30 | 141.69 | 137.09 |
| C5       | 59.58  | 58.29         | 49.10  | 59.58  | 58.69  | 58.59  | 56.74  | 54.28  | 53.60  |
| C4       | 41.8   | 42.41         | 42.29  | 44.59  | 42.69  | 43.98  | 43.56  | 42.35  | 41.76  |
| C2       | 41.03  | 44.39         | 44.78  | 46.20  | 43.57  | 44.12  | 46.06  | 49.09  | 43.40  |
| C1       | 60.65  | 62.73         | 72.40  | 69.35  | 63.78  | 66.82  | 71.86  | 71.74  | 74.42  |
| C9       | 28.6   | 19.05         | 19.35  | 10.90  | 19.97  | 18.48  | 12.04  | 13.23  | 19.73  |
| C10      | 20.63  | 26.13         | 26.63  | 22.67  | 24.90  | 24.49  | 23.32  | 26.09  | 21.83  |
| H8a      | 4.16   | 3.90          | 3.88   | 4.40   | 3.95   | 3.73   | 4.36   | 3.67   | 4.28   |
| H8b      | 4.02   | 4.11          | 4.14   | 4.80   | 3.97   | 3.86   | 4.92   | 3.85   | 4.28   |
| H7       | 6.03   | 6.17          | 6.11   | 6.38   | 6.03   | 6.26   | 6.30   | 6.20   | 5.89   |
| H5       | 4.65   | 4.55          | 4.99   | 4.02   | 4.97   | 4.82   | 4.13   | 4.93   | 4.87   |
| H4a      | 2.65   | 2.50          | 2.53   | 2.28   | 2.37   | 2.35   | 2.46   | 2.47   | 2.38   |
| H4b      | 2.5    | 2.57          | 2.63   | 2.56   | 2.49   | 2.60   | 2.50   | 2.50   | 2.49   |
| H1       | 4.73   | 4.80          | 4.33   | 4.14   | 4.71   | 4.80   | 4.00   | 4.80   | 4.43   |
| Me-9     | 1.33   | 1.06          | 1.07   | 1.22   | 1.20   | 1.26   | 1.14   | 1.18   | 1.18   |
| Me-10    | 1.02   | 1.36          | 1.35   | 1.22   | 1.33   | 1.35   | 1.21   | 1.41   | 1.21   |

**Table S2b.2.3** – Experimental data of **2b** and scaled chemical shifts of **2a-2h** at the B3LYP/6-31G\*\*//MMFF level of theory, after excluding all the signals adjacent to bromine.

| DP4      |        |               |        |        |        |        |        |        |        |
|----------|--------|---------------|--------|--------|--------|--------|--------|--------|--------|
| Compound |        | 2a            | 2b     | 2c     | 2d     | 2e     | 2f     | 2g     | 2h     |
| Nuclei   | Exp 2b | Scaled shifts |        |        |        |        |        |        |        |
| C8       | 37.62  | 36.13         | 36.48  | 39.98  | 35.98  | 34.58  | 39.79  | 36.21  | 37.77  |
| C7       | 131.89 | 129.66        | 128.87 | 129.99 | 127.50 | 125.03 | 130.76 | 124.76 | 129.84 |
| C6       | 137.83 | 140.65        | 139.53 | 136.18 | 142.35 | 143.36 | 135.30 | 141.69 | 137.09 |
| C5       | 50.44  | 58.29         | 49.10  | 59.58  | 58.69  | 58.59  | 56.74  | 54.28  | 53.60  |
| C4       | 41.32  | 42.41         | 42.29  | 44.59  | 42.69  | 43.98  | 43.56  | 42.35  | 41.76  |
| C2       | 41.36  | 44.39         | 44.78  | 46.20  | 43.57  | 44.12  | 46.06  | 49.09  | 43.40  |
| C1       | 69.98  | 62.73         | 72.40  | 69.35  | 63.78  | 66.82  | 71.86  | 71.74  | 74.42  |
| C9       | 28.53  | 19.05         | 19.35  | 10.90  | 19.97  | 18.48  | 12.04  | 13.23  | 19.73  |
| C10      | 20.47  | 26.13         | 26.63  | 22.67  | 24.90  | 24.49  | 23.32  | 26.09  | 21.83  |
| H8a      | 4.18   | 3.90          | 3.88   | 4.40   | 3.95   | 3.73   | 4.36   | 3.67   | 4.28   |
| H8b      | 4.04   | 4.11          | 4.14   | 4.80   | 3.97   | 3.86   | 4.92   | 3.85   | 4.28   |
| H7       | 5.95   | 6.17          | 6.11   | 6.38   | 6.03   | 6.26   | 6.30   | 6.20   | 5.89   |
| H5       | 4.97   | 4.55          | 4.99   | 4.02   | 4.97   | 4.82   | 4.13   | 4.93   | 4.87   |
| H4a      | 2.68   | 2.50          | 2.53   | 2.28   | 2.37   | 2.35   | 2.46   | 2.47   | 2.38   |
| H4b      | 2.53   | 2.57          | 2.63   | 2.56   | 2.49   | 2.60   | 2.50   | 2.50   | 2.49   |
| H1       | 4.38   | 4.80          | 4.33   | 4.14   | 4.71   | 4.80   | 4.00   | 4.80   | 4.43   |
| Me-9     | 1.28   | 1.06          | 1.07   | 1.22   | 1.20   | 1.26   | 1.14   | 1.18   | 1.18   |
| Me-10    | 1.01   | 1.36          | 1.35   | 1.22   | 1.33   | 1.35   | 1.21   | 1.41   | 1.21   |

**Table S2a.2.4**– Experimental data of **2a** and scaled chemical shifts of **2a-2h** at the B3LYP/6-31G\*\*//MMFF level of theory, after excluding all the signals adjacent to bromine and chlorine.

| DP4      |        |               |        |        |        |        |        |        |        |
|----------|--------|---------------|--------|--------|--------|--------|--------|--------|--------|
| Compound |        | 2a            | 2b     | 2c     | 2d     | 2e     | 2f     | 2g     | 2h     |
| Nuclei   | Exp 2a | Scaled shifts |        |        |        |        |        |        |        |
| C7       | 131.67 | 129.04        | 129.14 | 130.81 | 127.12 | 125.12 | 131.75 | 125.39 | 130.94 |
| C6       | 138.22 | 139.95        | 139.85 | 136.90 | 141.86 | 143.39 | 136.24 | 142.30 | 138.17 |
| C4       | 41.8   | 42.45         | 42.17  | 46.72  | 42.94  | 44.39  | 45.53  | 43.08  | 43.12  |
| C2       | 41.03  | 44.42         | 44.67  | 48.30  | 43.82  | 44.53  | 48.00  | 49.81  | 44.76  |
| C9       | 28.6   | 19.26         | 19.13  | 13.54  | 20.39  | 18.99  | 14.36  | 13.99  | 21.16  |
| C10      | 20.63  | 26.29         | 26.44  | 25.14  | 25.28  | 24.97  | 25.52  | 26.83  | 23.25  |
| H7       | 6.03   | 6.01          | 5.99   | 6.08   | 6.06   | 6.07   | 6.04   | 6.06   | 6.03   |
| H4a      | 2.65   | 2.47          | 2.49   | 2.27   | 2.37   | 2.29   | 2.45   | 2.42   | 2.43   |
| H4b      | 2.5    | 2.53          | 2.58   | 2.53   | 2.49   | 2.53   | 2.48   | 2.44   | 2.55   |
| Me-9     | 1.33   | 1.07          | 1.06   | 1.28   | 1.20   | 1.23   | 1.21   | 1.15   | 1.21   |
| Me-10    | 1.02   | 1.36          | 1.33   | 1.29   | 1.33   | 1.33   | 1.28   | 1.38   | 1.23   |

**Table S2b.2.4**– Experimental data of **2b** and scaled chemical shifts of **2a-2h** at the B3LYP/6-31G\*\*//MMFF level of theory, after excluding all the signals adjacent to bromine and chlorine.

| DP4      |        |               |        |        |        |        |        |        |        |
|----------|--------|---------------|--------|--------|--------|--------|--------|--------|--------|
| Compound |        | 2a            | 2b     | 2c     | 2d     | 2e     | 2f     | 2g     | 2h     |
| Nuclei   | Exp 2b | Scaled shifts |        |        |        |        |        |        |        |
| C7       | 131.89 | 129.04        | 129.14 | 130.81 | 127.12 | 125.12 | 131.75 | 125.39 | 130.94 |
| C6       | 137.83 | 139.95        | 139.85 | 136.90 | 141.86 | 143.39 | 136.24 | 142.30 | 138.17 |
| C4       | 41.32  | 42.45         | 42.17  | 46.72  | 42.94  | 44.39  | 45.53  | 43.08  | 43.12  |
| C2       | 41.36  | 44.42         | 44.67  | 48.30  | 43.82  | 44.53  | 48.00  | 49.81  | 44.76  |
| C9       | 28.53  | 19.26         | 19.13  | 13.54  | 20.39  | 18.99  | 14.36  | 13.99  | 21.16  |
| C10      | 20.47  | 26.29         | 26.44  | 25.14  | 25.28  | 24.97  | 25.52  | 26.83  | 23.25  |
| H7       | 5.95   | 6.01          | 5.99   | 6.08   | 6.06   | 6.07   | 6.04   | 6.06   | 6.03   |
| H4a      | 2.68   | 2.47          | 2.49   | 2.27   | 2.37   | 2.29   | 2.45   | 2.42   | 2.43   |
| H4b      | 2.53   | 2.53          | 2.58   | 2.53   | 2.49   | 2.53   | 2.48   | 2.44   | 2.55   |
| Me-9     | 1.28   | 1.07          | 1.06   | 1.28   | 1.20   | 1.23   | 1.21   | 1.15   | 1.21   |
| Me-10    | 1.01   | 1.36          | 1.33   | 1.29   | 1.33   | 1.33   | 1.28   | 1.38   | 1.23   |

**Table S2a.2.5** – Experimental data of **2a** and scaled chemical shifts of **2a-2h** at the B3LYP/6-31G\*\*//MMFF level of theory, after excluding all the carbon signals adjacent to bromine and chlorine.

| DP4      |        |               |        |        |        |        |        |        |        |    |
|----------|--------|---------------|--------|--------|--------|--------|--------|--------|--------|----|
| Compound |        |               | 2a     | 2b     | 2c     | 2d     | 2e     | 2f     | 2g     | 2h |
| Nuclei   | Exp 2a | Scaled shifts |        |        |        |        |        |        |        |    |
| C7       | 131.67 | 129.04        | 129.14 | 130.81 | 127.12 | 125.12 | 131.75 | 125.39 | 130.94 |    |
| C6       | 138.22 | 139.95        | 139.85 | 136.90 | 141.86 | 143.39 | 136.24 | 142.30 | 138.17 |    |
| C4       | 41.8   | 42.45         | 42.17  | 46.72  | 42.94  | 44.39  | 45.53  | 43.08  | 43.12  |    |
| C2       | 41.03  | 44.42         | 44.67  | 48.30  | 43.82  | 44.53  | 48.00  | 49.81  | 44.76  |    |
| C9       | 28.6   | 19.26         | 19.13  | 13.54  | 20.39  | 18.99  | 14.36  | 13.99  | 21.16  |    |
| C10      | 20.63  | 26.29         | 26.44  | 25.14  | 25.28  | 24.97  | 25.52  | 26.83  | 23.25  |    |
| H8a      | 4.16   | 3.85          | 3.83   | 4.53   | 4.02   | 3.76   | 4.49   | 3.70   | 4.34   |    |
| H8b      | 4.02   | 4.05          | 4.08   | 4.95   | 4.04   | 3.89   | 5.08   | 3.88   | 4.34   |    |
| H7       | 6.03   | 6.07          | 6.01   | 6.60   | 6.16   | 6.33   | 6.53   | 6.27   | 5.99   |    |
| H5       | 4.65   | 4.48          | 4.91   | 4.13   | 5.08   | 4.86   | 4.25   | 4.97   | 4.94   |    |
| H4a      | 2.65   | 2.48          | 2.51   | 2.31   | 2.39   | 2.35   | 2.50   | 2.49   | 2.39   |    |
| H4b      | 2.5    | 2.55          | 2.61   | 2.60   | 2.51   | 2.61   | 2.54   | 2.51   | 2.51   |    |
| H3       | 4.83   | 5.22          | 5.20   | 4.05   | 4.33   | 4.61   | 4.04   | 4.61   | 4.48   |    |
| H1       | 4.73   | 4.72          | 4.27   | 4.26   | 4.81   | 4.84   | 4.11   | 4.84   | 4.50   |    |
| Me-9     | 1.33   | 1.07          | 1.08   | 1.20   | 1.19   | 1.25   | 1.12   | 1.17   | 1.17   |    |
| Me-10    | 1.02   | 1.36          | 1.35   | 1.20   | 1.32   | 1.35   | 1.19   | 1.41   | 1.20   |    |

**Table S2b.2.5** – Experimental data of **2b** and scaled chemical shifts of **2a-2h** at the B3LYP/6-31G\*\*//MMFF level of theory, after excluding all the carbon signals adjacent to bromine and chlorine.

| DP4      |        |               |        |        |        |        |        |        |        |    |
|----------|--------|---------------|--------|--------|--------|--------|--------|--------|--------|----|
| Compound |        |               | 2a     | 2b     | 2c     | 2d     | 2e     | 2f     | 2g     | 2h |
| Nuclei   | Exp 2b | Scaled shifts |        |        |        |        |        |        |        |    |
| C7       | 131.89 | 129.04        | 129.14 | 130.81 | 127.12 | 125.12 | 131.75 | 125.39 | 130.94 |    |
| C6       | 137.83 | 139.95        | 139.85 | 136.90 | 141.86 | 143.39 | 136.24 | 142.30 | 138.17 |    |
| C4       | 41.32  | 42.45         | 42.17  | 46.72  | 42.94  | 44.39  | 45.53  | 43.08  | 43.12  |    |
| C2       | 41.36  | 44.42         | 44.67  | 48.30  | 43.82  | 44.53  | 48.00  | 49.81  | 44.76  |    |
| C9       | 28.53  | 19.26         | 19.13  | 13.54  | 20.39  | 18.99  | 14.36  | 13.99  | 21.16  |    |
| C10      | 20.47  | 26.29         | 26.44  | 25.14  | 25.28  | 24.97  | 25.52  | 26.83  | 23.25  |    |
| H8a      | 4.18   | 3.85          | 3.83   | 4.53   | 4.02   | 3.76   | 4.49   | 3.70   | 4.34   |    |
| H8b      | 4.04   | 4.05          | 4.08   | 4.95   | 4.04   | 3.89   | 5.08   | 3.88   | 4.34   |    |
| H7       | 5.95   | 6.07          | 6.01   | 6.60   | 6.16   | 6.33   | 6.53   | 6.27   | 5.99   |    |
| H5       | 4.97   | 4.48          | 4.91   | 4.13   | 5.08   | 4.86   | 4.25   | 4.97   | 4.94   |    |
| H4a      | 2.68   | 2.48          | 2.51   | 2.31   | 2.39   | 2.35   | 2.50   | 2.49   | 2.39   |    |
| H4b      | 2.53   | 2.55          | 2.61   | 2.60   | 2.51   | 2.61   | 2.54   | 2.51   | 2.51   |    |
| H3       | 4.83   | 5.22          | 5.20   | 4.05   | 4.33   | 4.61   | 4.04   | 4.61   | 4.48   |    |
| H1       | 4.38   | 4.72          | 4.27   | 4.26   | 4.81   | 4.84   | 4.11   | 4.84   | 4.50   |    |
| Me-9     | 1.28   | 1.07          | 1.08   | 1.20   | 1.19   | 1.25   | 1.12   | 1.17   | 1.17   |    |
| Me-10    | 1.01   | 1.36          | 1.35   | 1.20   | 1.32   | 1.35   | 1.19   | 1.41   | 1.20   |    |

**Table S2.3.1** – Experimental data of **2a-b** and calculated isotropic shielding constants of **2a-2h** at the SMD/wB97XD/6-31+G\*\*//MMFF level of theory.

| MM-DP4+  |        |        |                               |        |        |        |        |        |        |        |
|----------|--------|--------|-------------------------------|--------|--------|--------|--------|--------|--------|--------|
| Compound |        |        | 2a                            | 2b     | 2c     | 2d     | 2e     | 2f     | 2g     | 2h     |
| Nuclei   | Exp 2a | Exp 2b | Isotropic shielding constants |        |        |        |        |        |        |        |
| C8       | 37.73  | 37.62  | 153.06                        | 153.03 | 147.59 | 151.76 | 153.74 | 147.94 | 153.53 | 149.69 |
| C7       | 131.67 | 131.89 | 63.08                         | 63.08  | 62.71  | 65.82  | 68.15  | 61.93  | 67.25  | 61.73  |
| C6       | 138.22 | 137.83 | 52.51                         | 52.70  | 56.88  | 51.87  | 50.80  | 57.63  | 50.75  | 54.81  |
| C5       | 59.58  | 50.44  | 131.74                        | 140.74 | 129.11 | 130.44 | 131.02 | 131.91 | 135.92 | 134.56 |
| C4       | 41.8   | 41.32  | 147.02                        | 147.37 | 143.25 | 145.46 | 144.85 | 144.37 | 147.54 | 145.88 |
| C3       | 52.72  | 52.7   | 129.25                        | 129.29 | 124.86 | 126.73 | 127.55 | 125.22 | 125.63 | 127.11 |
| C2       | 41.03  | 41.36  | 145.11                        | 144.95 | 141.73 | 144.63 | 144.71 | 142.01 | 140.97 | 144.31 |
| C1       | 60.65  | 69.98  | 127.47                        | 118.06 | 119.90 | 125.65 | 123.24 | 117.62 | 118.91 | 114.68 |
| C10      | 20.63  | 20.47  | 169.50                        | 169.70 | 175.02 | 166.80 | 168.97 | 174.18 | 175.92 | 166.93 |
| C9       | 28.6   | 28.53  | 162.69                        | 162.62 | 163.92 | 162.17 | 163.29 | 163.51 | 163.39 | 164.92 |
| H8b      | 4.02   | 4.04   | 28.06                         | 28.07  | 27.49  | 27.76  | 28.07  | 27.50  | 28.09  | 27.45  |
| H8a      | 4.16   | 4.18   | 27.86                         | 27.82  | 27.10  | 27.74  | 27.94  | 26.95  | 27.90  | 27.45  |
| H7       | 6.03   | 5.95   | 25.90                         | 25.93  | 25.57  | 25.61  | 25.46  | 25.58  | 25.41  | 25.79  |
| H5       | 4.65   | 4.97   | 27.44                         | 27.01  | 27.86  | 26.70  | 26.95  | 27.73  | 26.76  | 26.84  |

|       |      |      |       |       |       |       |       |       |       |       |
|-------|------|------|-------|-------|-------|-------|-------|-------|-------|-------|
| H4b   | 2.5  | 2.53 | 29.38 | 29.37 | 29.55 | 29.40 | 29.49 | 29.37 | 29.36 | 29.40 |
| H4a   | 2.65 | 2.68 | 29.32 | 29.28 | 29.28 | 29.27 | 29.23 | 29.34 | 29.34 | 29.28 |
| H3    | 4.83 | 4.83 | 26.72 | 26.72 | 26.72 | 27.94 | 27.44 | 27.20 | 27.92 | 27.31 |
| H1    | 4.73 | 4.38 | 27.21 | 27.64 | 27.74 | 26.97 | 26.97 | 27.85 | 26.90 | 27.29 |
| Me-9  | 1.02 | 1.01 | 30.75 | 30.78 | 30.58 | 30.60 | 30.61 | 30.68 | 30.73 | 30.62 |
| Me-10 | 1.33 | 1.28 | 30.47 | 30.51 | 30.57 | 30.47 | 30.51 | 30.61 | 30.48 | 30.60 |

**Table S2a.3.2** – Experimental data of **2a** and scaled chemical shifts of **2a-2h** at the SMD/wB97XD/6-31+G\*\*//MMFF level of theory.

| Compound |        | MM-DP4+       |        |        |        |        |        |        |        |
|----------|--------|---------------|--------|--------|--------|--------|--------|--------|--------|
| Nuclei   | Exp 2a | 2a            | 2b     | 2c     | 2d     | 2e     | 2f     | 2g     | 2h     |
|          |        | Scaled shifts |        |        |        |        |        |        |        |
| C8       | 37.73  | 36.35         | 36.46  | 37.07  | 33.82  | 34.69  | 36.90  | 35.48  | 35.69  |
| C7       | 131.67 | 130.26        | 130.46 | 130.49 | 124.69 | 124.73 | 131.09 | 124.56 | 125.92 |
| C6       | 138.22 | 138.68        | 138.30 | 141.46 | 144.68 | 142.42 | 141.20 | 141.24 | 142.13 |
| C5       | 59.58  | 56.58         | 48.23  | 53.66  | 55.69  | 57.68  | 45.28  | 52.72  | 50.52  |
| C4       | 41.8   | 41.92         | 41.35  | 39.94  | 42.29  | 42.85  | 39.43  | 41.44  | 38.89  |
| C3       | 52.72  | 59.32         | 59.42  | 56.98  | 60.43  | 60.35  | 56.78  | 62.36  | 62.18  |
| C2       | 41.03  | 43.76         | 43.90  | 43.28  | 42.03  | 43.15  | 42.95  | 47.35  | 44.62  |
| C1       | 60.65  | 60.51         | 69.27  | 57.20  | 60.25  | 63.90  | 65.06  | 69.09  | 67.54  |
| C9       | 20.63  | 19.44         | 19.20  | 25.57  | 23.66  | 18.99  | 26.70  | 13.30  | 19.55  |
| C10      | 28.6   | 25.80         | 26.04  | 26.99  | 25.11  | 23.86  | 27.23  | 25.09  | 25.59  |
| H8a      | 4.02   | 3.85          | 3.87   | 3.96   | 3.83   | 3.80   | 3.95   | 3.76   | 3.85   |
| H8b      | 4.16   | 4.00          | 3.99   | 4.11   | 3.86   | 3.89   | 4.11   | 3.86   | 3.91   |
| H7       | 6.03   | 6.18          | 6.18   | 6.44   | 6.29   | 6.26   | 6.40   | 6.22   | 6.18   |
| H5       | 4.65   | 4.59          | 4.87   | 4.66   | 5.25   | 4.91   | 5.03   | 4.97   | 4.98   |
| H4a      | 2.5    | 2.45          | 2.53   | 2.52   | 2.51   | 2.36   | 2.62   | 2.40   | 2.42   |
| H4b      | 2.65   | 2.60          | 2.57   | 2.73   | 2.57   | 2.64   | 2.74   | 2.53   | 2.66   |
| H3       | 4.83   | 5.00          | 4.99   | 4.34   | 4.29   | 4.55   | 4.34   | 4.59   | 4.32   |
| H1       | 4.73   | 4.73          | 4.43   | 4.71   | 4.79   | 4.91   | 4.36   | 4.94   | 5.09   |
| Me-9     | 1.02   | 1.16          | 1.15   | 1.05   | 1.17   | 1.25   | 1.00   | 1.17   | 1.12   |
| Me-10    | 1.33   | 1.37          | 1.33   | 1.40   | 1.37   | 1.33   | 1.36   | 1.47   | 1.38   |

**Table S2b.3.2** – Experimental data of **2b** and scaled chemical shifts of **2a-2h** at the SMD/wB97XD/6-31+G\*\*//MMFF level of theory.

| Compound |        | MM-DP4+       |        |        |        |        |        |        |        |
|----------|--------|---------------|--------|--------|--------|--------|--------|--------|--------|
| Nuclei   | Exp 2b | 2a            | 2b     | 2c     | 2d     | 2e     | 2f     | 2g     | 2h     |
|          |        | Scaled shifts |        |        |        |        |        |        |        |
| C8       | 37.62  | 36.04         | 36.42  | 36.77  | 33.49  | 34.41  | 36.84  | 35.36  | 35.58  |
| C7       | 131.89 | 130.92        | 130.39 | 131.18 | 125.28 | 125.25 | 131.08 | 124.67 | 126.01 |
| C6       | 137.83 | 139.42        | 138.23 | 142.26 | 145.47 | 143.09 | 141.20 | 141.39 | 142.25 |
| C5       | 50.44  | 56.48         | 48.19  | 53.53  | 55.58  | 57.60  | 45.22  | 52.65  | 50.45  |
| C4       | 41.32  | 41.67         | 41.31  | 39.67  | 42.04  | 42.63  | 39.37  | 41.34  | 38.79  |
| C3       | 52.7   | 59.25         | 59.37  | 56.88  | 60.37  | 60.29  | 56.73  | 62.32  | 62.14  |
| C2       | 41.36  | 43.53         | 43.86  | 43.04  | 41.79  | 42.94  | 42.89  | 47.27  | 44.53  |
| C1       | 69.98  | 60.45         | 69.21  | 57.10  | 60.19  | 63.88  | 65.01  | 69.06  | 67.51  |
| C9       | 28.53  | 18.97         | 19.16  | 25.14  | 23.23  | 18.57  | 26.63  | 13.13  | 19.41  |
| C10      | 20.47  | 25.39         | 26.00  | 26.58  | 24.69  | 23.48  | 27.16  | 24.95  | 25.46  |
| H8a      | 4.18   | 3.84          | 3.86   | 3.96   | 3.82   | 3.80   | 3.94   | 3.75   | 3.85   |
| H8b      | 4.04   | 3.99          | 3.98   | 4.10   | 3.85   | 3.88   | 4.10   | 3.85   | 3.91   |
| H7       | 5.95   | 6.19          | 6.17   | 6.44   | 6.28   | 6.27   | 6.38   | 6.23   | 6.19   |
| H5       | 4.97   | 4.59          | 4.86   | 4.66   | 5.24   | 4.91   | 5.02   | 4.97   | 4.98   |
| H4a      | 2.68   | 2.43          | 2.53   | 2.51   | 2.50   | 2.35   | 2.62   | 2.39   | 2.41   |
| H4b      | 2.53   | 2.58          | 2.57   | 2.72   | 2.56   | 2.63   | 2.74   | 2.52   | 2.65   |
| H3       | 4.83   | 5.00          | 4.98   | 4.34   | 4.28   | 4.55   | 4.33   | 4.59   | 4.32   |
| H1       | 4.38   | 4.73          | 4.42   | 4.71   | 4.78   | 4.91   | 4.35   | 4.94   | 5.09   |
| Me-9     | 1.28   | 1.14          | 1.15   | 1.03   | 1.17   | 1.24   | 1.00   | 1.15   | 1.10   |
| Me-10    | 1.01   | 1.35          | 1.33   | 1.39   | 1.37   | 1.32   | 1.37   | 1.45   | 1.36   |

**Table S2a.3.3** – Experimental data of **2a** and scaled chemical shifts of **2a-2h** at the SMD/wB97XD/6-31+G\*\*//MMFF level of theory, after excluding all the signals adjacent to bromine.

| Compound |        | MM-DP4+ |    |    |    |    |    |    |    |
|----------|--------|---------|----|----|----|----|----|----|----|
| Nuclei   | Exp 2a | 2a      | 2b | 2c | 2d | 2e | 2f | 2g | 2h |



| <b>Nuclei</b> | <b>Exp 2a</b> | <b>Scaled shifts</b> |        |        |        |        |        |        |        |
|---------------|---------------|----------------------|--------|--------|--------|--------|--------|--------|--------|
| C8            | 37.73         | 36.87                | 37.26  | 37.30  | 34.48  | 35.38  | 37.35  | 36.59  | 36.78  |
| C7            | 131.67        | 131.36               | 130.84 | 131.46 | 125.83 | 125.80 | 131.35 | 125.35 | 126.68 |
| C6            | 138.22        | 139.83               | 138.65 | 142.51 | 145.92 | 143.55 | 141.45 | 141.98 | 142.83 |
| C5            | 59.58         | 57.23                | 48.98  | 54.01  | 56.46  | 58.46  | 45.71  | 53.77  | 51.56  |
| C4            | 41.8          | 42.48                | 42.14  | 40.19  | 42.99  | 43.56  | 39.87  | 42.53  | 39.97  |
| C2            | 41.03         | 44.33                | 44.67  | 43.55  | 42.73  | 43.87  | 43.39  | 48.42  | 45.68  |
| C1            | 60.65         | 61.18                | 69.92  | 57.58  | 61.04  | 64.71  | 65.45  | 70.08  | 68.52  |
| C9            | 28.6          | 19.87                | 20.08  | 25.70  | 24.26  | 19.61  | 27.17  | 14.48  | 20.70  |
| C10           | 20.63         | 26.26                | 26.89  | 27.14  | 25.72  | 24.50  | 27.70  | 26.23  | 26.72  |
| H8a           | 4.16          | 3.87                 | 3.88   | 3.89   | 3.75   | 3.76   | 3.87   | 3.72   | 3.78   |
| H8b           | 4.02          | 4.02                 | 4.00   | 4.03   | 3.78   | 3.85   | 4.03   | 3.82   | 3.84   |
| H7            | 6.03          | 6.23                 | 6.21   | 6.30   | 6.12   | 6.19   | 6.24   | 6.16   | 6.05   |
| H5            | 4.65          | 4.62                 | 4.89   | 4.57   | 5.12   | 4.85   | 4.92   | 4.92   | 4.88   |
| H4a           | 2.65          | 2.44                 | 2.54   | 2.48   | 2.48   | 2.34   | 2.59   | 2.38   | 2.39   |
| H4b           | 2.5           | 2.59                 | 2.58   | 2.69   | 2.53   | 2.62   | 2.71   | 2.51   | 2.62   |
| H1            | 4.73          | 4.76                 | 4.44   | 4.62   | 4.68   | 4.85   | 4.27   | 4.89   | 4.98   |
| Me-9          | 1.33          | 1.14                 | 1.15   | 1.05   | 1.18   | 1.25   | 1.02   | 1.16   | 1.12   |
| Me-10         | 1.02          | 1.35                 | 1.33   | 1.39   | 1.38   | 1.32   | 1.38   | 1.46   | 1.37   |

**Table S2b.3.3** – Experimental data of **2b** and scaled chemical shifts of **2a-2h** at the SMD/wB97XD/6-31+G\*\*//MMFF level of theory, after excluding all the signals adjacent to bromine.

| <b>MM-DP4+</b>  |               |                      |           |           |           |           |           |           |           |
|-----------------|---------------|----------------------|-----------|-----------|-----------|-----------|-----------|-----------|-----------|
| <b>Compound</b> |               | <b>2a</b>            | <b>2b</b> | <b>2c</b> | <b>2d</b> | <b>2e</b> | <b>2f</b> | <b>2g</b> | <b>2h</b> |
| <b>Nuclei</b>   | <b>Exp 2b</b> | <b>Scaled shifts</b> |           |           |           |           |           |           |           |
| C8              | 37.62         | 36.87                | 37.26     | 37.30     | 34.48     | 35.38     | 37.35     | 36.59     | 36.78     |
| C7              | 131.89        | 131.36               | 130.84    | 131.46    | 125.83    | 125.80    | 131.35    | 125.35    | 126.68    |
| C6              | 137.83        | 139.83               | 138.65    | 142.51    | 145.92    | 143.55    | 141.45    | 141.98    | 142.83    |
| C5              | 50.44         | 57.23                | 48.98     | 54.01     | 56.46     | 58.46     | 45.71     | 53.77     | 51.56     |
| C4              | 41.32         | 42.48                | 42.14     | 40.19     | 42.99     | 43.56     | 39.87     | 42.53     | 39.97     |
| C2              | 41.36         | 44.33                | 44.67     | 43.55     | 42.73     | 43.87     | 43.39     | 48.42     | 45.68     |
| C1              | 69.98         | 61.18                | 69.92     | 57.58     | 61.04     | 64.71     | 65.45     | 70.08     | 68.52     |
| C9              | 28.53         | 19.87                | 20.08     | 25.70     | 24.26     | 19.61     | 27.17     | 14.48     | 20.70     |
| C10             | 20.47         | 26.26                | 26.89     | 27.14     | 25.72     | 24.50     | 27.70     | 26.23     | 26.72     |
| H8a             | 4.18          | 3.87                 | 3.88      | 3.89      | 3.75      | 3.76      | 3.87      | 3.72      | 3.78      |
| H8b             | 4.04          | 4.02                 | 4.00      | 4.03      | 3.78      | 3.85      | 4.03      | 3.82      | 3.84      |
| H7              | 5.95          | 6.23                 | 6.21      | 6.30      | 6.12      | 6.19      | 6.24      | 6.16      | 6.05      |
| H5              | 4.97          | 4.62                 | 4.89      | 4.57      | 5.12      | 4.85      | 4.92      | 4.92      | 4.88      |
| H4a             | 2.68          | 2.44                 | 2.54      | 2.48      | 2.48      | 2.34      | 2.59      | 2.38      | 2.39      |
| H4b             | 2.53          | 2.59                 | 2.58      | 2.69      | 2.53      | 2.62      | 2.71      | 2.51      | 2.62      |
| H1              | 4.38          | 4.76                 | 4.44      | 4.62      | 4.68      | 4.85      | 4.27      | 4.89      | 4.98      |
| Me-9            | 1.28          | 1.14                 | 1.15      | 1.05      | 1.18      | 1.25      | 1.02      | 1.16      | 1.12      |
| Me-10           | 1.01          | 1.35                 | 1.33      | 1.39      | 1.38      | 1.32      | 1.38      | 1.46      | 1.37      |

**Table S2a.3.4**– Experimental data of **2a** and scaled chemical shifts of **2a-2h** at the SMD/wB97XD/6-31+G\*\*//MMFF level of theory, after excluding all the signals adjacent to bromine and chlorine.

| <b>MM-DP4+</b>  |               |                      |           |           |           |           |           |           |           |
|-----------------|---------------|----------------------|-----------|-----------|-----------|-----------|-----------|-----------|-----------|
| <b>Compound</b> |               | <b>2a</b>            | <b>2b</b> | <b>2c</b> | <b>2d</b> | <b>2e</b> | <b>2f</b> | <b>2g</b> | <b>2h</b> |
| <b>Nuclei</b>   | <b>Exp 2a</b> | <b>Scaled shifts</b> |           |           |           |           |           |           |           |
| C7              | 131.67        | 130.38               | 130.68    | 129.55    | 124.68    | 125.54    | 130.09    | 125.65    | 126.49    |
| C6              | 138.22        | 138.78               | 138.51    | 140.53    | 144.73    | 143.19    | 140.23    | 142.25    | 142.64    |
| C4              | 41.8          | 42.23                | 41.76     | 38.84     | 42.04     | 43.78     | 38.14     | 42.97     | 39.77     |
| C2              | 41.03         | 44.06                | 44.31     | 42.18     | 41.78     | 44.09     | 41.67     | 48.85     | 45.48     |
| C9              | 28.6          | 19.80                | 19.66     | 24.44     | 23.36     | 19.97     | 25.37     | 14.97     | 20.50     |
| C10             | 20.63         | 26.14                | 26.48     | 25.87     | 24.81     | 24.83     | 25.90     | 26.70     | 26.52     |
| H7              | 6.03          | 6.04                 | 6.02      | 6.01      | 6.04      | 6.06      | 5.98      | 6.07      | 6.02      |
| H4a             | 2.65          | 2.39                 | 2.47      | 2.41      | 2.43      | 2.30      | 2.50      | 2.34      | 2.37      |
| H4b             | 2.5           | 2.54                 | 2.52      | 2.60      | 2.49      | 2.57      | 2.62      | 2.47      | 2.60      |
| Me-9            | 1.33          | 1.14                 | 1.13      | 1.05      | 1.15      | 1.23      | 1.01      | 1.14      | 1.10      |
| Me-10           | 1.02          | 1.34                 | 1.31      | 1.38      | 1.34      | 1.30      | 1.35      | 1.43      | 1.35      |

**Table S2b.3.4**– Experimental data of **2b** and scaled chemical shifts of **2a-2h** at the SMD/wB97XD/6-31+G\*\*//MMFF level of theory, after excluding all the signals adjacent to bromine and chlorine.

| Compound |        | MM-DP4+ |        |        |        |        |        |        |        |
|----------|--------|---------|--------|--------|--------|--------|--------|--------|--------|
| Nuclei   | Exp 2b | 2a      | 2b     | 2c     | 2d     | 2e     | 2f     | 2g     | 2h     |
| C7       | 131.89 | 130.38  | 130.68 | 129.55 | 124.68 | 125.54 | 130.09 | 125.65 | 126.49 |
| C6       | 137.83 | 138.78  | 138.51 | 140.53 | 144.73 | 143.19 | 140.23 | 142.25 | 142.64 |
| C4       | 41.32  | 42.23   | 41.76  | 38.84  | 42.04  | 43.78  | 38.14  | 42.97  | 39.77  |
| C2       | 41.36  | 44.06   | 44.31  | 42.18  | 41.78  | 44.09  | 41.67  | 48.85  | 45.48  |
| C9       | 28.53  | 19.80   | 19.66  | 24.44  | 23.36  | 19.97  | 25.37  | 14.97  | 20.50  |
| C10      | 20.47  | 26.14   | 26.48  | 25.87  | 24.81  | 24.83  | 25.90  | 26.70  | 26.52  |
| H7       | 5.95   | 6.04    | 6.02   | 6.01   | 6.04   | 6.06   | 5.98   | 6.07   | 6.02   |
| H4a      | 2.68   | 2.39    | 2.47   | 2.41   | 2.43   | 2.30   | 2.50   | 2.34   | 2.37   |
| H4b      | 2.53   | 2.54    | 2.52   | 2.60   | 2.49   | 2.57   | 2.62   | 2.47   | 2.60   |
| Me-9     | 1.28   | 1.14    | 1.13   | 1.05   | 1.15   | 1.23   | 1.01   | 1.14   | 1.10   |
| Me-10    | 1.01   | 1.34    | 1.31   | 1.38   | 1.34   | 1.30   | 1.35   | 1.43   | 1.35   |

**Table S2a.3.5** – Experimental data of **2a** and scaled chemical shifts of **2a-2h** at the SMD/wB97XD/6-31+G\*\*//MMFF level of theory, after excluding all the carbon signals adjacent to bromine and chlorine.

| Compound |        | MM-DP4+ |        |        |        |        |        |        |        |
|----------|--------|---------|--------|--------|--------|--------|--------|--------|--------|
| Nuclei   | Exp 2a | 2a      | 2b     | 2c     | 2d     | 2e     | 2f     | 2g     | 2h     |
| C7       | 131.67 | 130.47  | 130.78 | 129.64 | 124.75 | 125.62 | 130.18 | 125.74 | 126.58 |
| C6       | 138.22 | 138.87  | 138.61 | 140.62 | 144.79 | 143.26 | 140.32 | 142.34 | 142.72 |
| C4       | 41.8   | 42.32   | 41.85  | 38.93  | 42.14  | 43.88  | 38.23  | 43.06  | 39.87  |
| C2       | 41.03  | 44.16   | 44.40  | 42.27  | 41.88  | 44.18  | 41.76  | 48.94  | 45.57  |
| C9       | 28.6   | 19.89   | 19.75  | 24.53  | 23.46  | 20.07  | 25.46  | 15.07  | 20.59  |
| C10      | 20.63  | 26.23   | 26.57  | 25.96  | 24.92  | 24.93  | 26.00  | 26.80  | 26.61  |
| H8a      | 4.16   | 3.85    | 3.87   | 3.96   | 3.83   | 3.80   | 3.95   | 3.76   | 3.85   |
| H8b      | 4.02   | 4.00    | 3.99   | 4.11   | 3.86   | 3.89   | 4.11   | 3.86   | 3.91   |
| H7       | 6.03   | 6.18    | 6.18   | 6.44   | 6.29   | 6.26   | 6.40   | 6.22   | 6.18   |
| H5       | 4.65   | 4.59    | 4.87   | 4.66   | 5.25   | 4.91   | 5.03   | 4.97   | 4.98   |
| H4a      | 2.65   | 2.45    | 2.53   | 2.52   | 2.51   | 2.36   | 2.62   | 2.40   | 2.42   |
| H4b      | 2.5    | 2.60    | 2.57   | 2.73   | 2.57   | 2.64   | 2.74   | 2.53   | 2.66   |
| H3       | 4.83   | 5.00    | 4.99   | 4.34   | 4.29   | 4.55   | 4.34   | 4.59   | 4.32   |
| H1       | 4.73   | 4.73    | 4.43   | 4.71   | 4.79   | 4.91   | 4.36   | 4.94   | 5.09   |
| Me-9     | 1.33   | 1.16    | 1.15   | 1.05   | 1.17   | 1.25   | 1.00   | 1.17   | 1.12   |
| Me-10    | 1.02   | 1.37    | 1.33   | 1.40   | 1.37   | 1.33   | 1.36   | 1.47   | 1.38   |

**Table S2b.3.5** – Experimental data of **2b** and scaled chemical shifts of **2a-2h** at the SMD/wB97XD/6-31+G\*\*//MMFF level of theory, after excluding all the carbon signals adjacent to bromine and chlorine.

| Compound |        | MM-DP4+ |        |        |        |        |        |        |        |
|----------|--------|---------|--------|--------|--------|--------|--------|--------|--------|
| Nuclei   | Exp 2b | 2a      | 2b     | 2c     | 2d     | 2e     | 2f     | 2g     | 2h     |
| C7       | 131.89 | 130.38  | 130.68 | 129.55 | 124.68 | 125.54 | 130.09 | 125.65 | 126.49 |
| C6       | 137.83 | 138.78  | 138.51 | 140.53 | 144.73 | 143.19 | 140.23 | 142.25 | 142.64 |
| C4       | 41.32  | 42.23   | 41.76  | 38.84  | 42.04  | 43.78  | 38.14  | 42.97  | 39.77  |
| C2       | 41.36  | 44.06   | 44.31  | 42.18  | 41.78  | 44.09  | 41.67  | 48.85  | 45.48  |
| C9       | 28.53  | 19.80   | 19.66  | 24.44  | 23.36  | 19.97  | 25.37  | 14.97  | 20.50  |
| C10      | 20.47  | 26.14   | 26.48  | 25.87  | 24.81  | 24.83  | 25.90  | 26.70  | 26.52  |
| H8a      | 4.18   | 3.84    | 3.86   | 3.96   | 3.82   | 3.80   | 3.94   | 3.75   | 3.85   |
| H8b      | 4.04   | 3.99    | 3.98   | 4.10   | 3.85   | 3.88   | 4.10   | 3.85   | 3.91   |
| H7       | 5.95   | 6.19    | 6.17   | 6.44   | 6.28   | 6.27   | 6.38   | 6.23   | 6.19   |
| H5       | 4.97   | 4.59    | 4.86   | 4.66   | 5.24   | 4.91   | 5.02   | 4.97   | 4.98   |
| H4a      | 2.68   | 2.43    | 2.53   | 2.51   | 2.50   | 2.35   | 2.62   | 2.39   | 2.41   |
| H4b      | 2.53   | 2.58    | 2.57   | 2.72   | 2.56   | 2.63   | 2.74   | 2.52   | 2.65   |
| H3       | 4.83   | 5.00    | 4.98   | 4.34   | 4.28   | 4.55   | 4.33   | 4.59   | 4.32   |
| H1       | 4.38   | 4.73    | 4.42   | 4.71   | 4.78   | 4.91   | 4.35   | 4.94   | 5.09   |
| Me-9     | 1.28   | 1.14    | 1.15   | 1.03   | 1.17   | 1.24   | 1.00   | 1.15   | 1.10   |
| Me-10    | 1.01   | 1.35    | 1.33   | 1.39   | 1.37   | 1.32   | 1.37   | 1.45   | 1.36   |

**Table S2.4.1** – Experimental data of **2a-b** and calculated isotropic shielding constants of **2a-2h** at the PCM/mPW1PW91/6-311+G\*\*// B3LYP/6-31G\* level of theory.

| DP4+     |        |        |                               |        |        |        |        |        |        |        |
|----------|--------|--------|-------------------------------|--------|--------|--------|--------|--------|--------|--------|
| Compound |        |        | 2a                            | 2b     | 2c     | 2d     | 2e     | 2f     | 2g     | 2h     |
| Nuclei   | Exp 2a | Exp 2b | Isotropic shielding constants |        |        |        |        |        |        |        |
| C8       | 37.73  | 37.62  | 139.23                        | 139.17 | 138.94 | 139.51 | 139.70 | 139.12 | 139.82 | 138.82 |
| C7       | 131.67 | 131.89 | 44.19                         | 44.02  | 47.77  | 53.62  | 53.66  | 46.17  | 52.66  | 51.09  |
| C6       | 138.22 | 137.83 | 39.30                         | 39.18  | 39.60  | 37.76  | 39.23  | 37.98  | 38.28  | 38.76  |
| C5       | 59.58  | 50.44  | 115.37                        | 125.47 | 118.42 | 118.27 | 118.20 | 128.38 | 120.37 | 121.97 |
| C4       | 41.8   | 41.32  | 142.56                        | 143.04 | 142.61 | 140.92 | 140.79 | 144.57 | 142.86 | 143.22 |
| C3       | 52.72  | 52.7   | 115.17                        | 115.11 | 115.27 | 111.57 | 114.11 | 117.26 | 111.91 | 111.85 |
| C2       | 41.03  | 41.36  | 140.07                        | 139.72 | 138.95 | 139.05 | 138.99 | 140.11 | 135.12 | 137.37 |
| C1       | 60.65  | 69.98  | 114.72                        | 104.36 | 114.24 | 113.47 | 109.89 | 109.21 | 106.90 | 104.72 |
| C9       | 28.6   | 28.53  | 166.22                        | 166.67 | 163.98 | 160.27 | 165.64 | 159.95 | 172.57 | 163.79 |
| C10      | 20.63  | 20.47  | 158.70                        | 158.72 | 158.54 | 158.28 | 159.78 | 158.29 | 158.55 | 160.48 |
| H8a      | 4.16   | 4.18   | 27.57                         | 27.60  | 27.42  | 27.48  | 27.59  | 27.43  | 27.54  | 27.26  |
| H8b      | 4.02   | 4.04   | 27.53                         | 27.50  | 27.23  | 27.47  | 27.58  | 27.32  | 27.51  | 27.23  |
| H7       | 6.03   | 5.95   | 25.42                         | 25.47  | 25.35  | 25.31  | 25.32  | 25.40  | 25.19  | 25.42  |
| H5       | 4.65   | 4.97   | 26.94                         | 26.65  | 27.11  | 26.31  | 26.60  | 26.74  | 26.43  | 26.51  |
| H4a      | 2.65   | 2.68   | 29.24                         | 29.28  | 29.25  | 29.27  | 29.40  | 29.05  | 29.32  | 29.25  |
| H4b      | 2.5    | 2.53   | 29.22                         | 29.14  | 29.05  | 29.20  | 29.11  | 28.98  | 29.23  | 29.10  |
| H3       | 4.83   | 4.83   | 26.71                         | 26.64  | 27.58  | 27.32  | 27.00  | 27.46  | 26.98  | 27.25  |
| H1       | 4.73   | 4.38   | 26.91                         | 27.25  | 27.18  | 26.86  | 26.76  | 27.40  | 26.70  | 26.68  |
| Me-9     | 1.33   | 1.28   | 30.74                         | 30.72  | 30.58  | 30.62  | 30.64  | 30.68  | 30.74  | 30.67  |
| Me-10    | 1.02   | 1.01   | 30.41                         | 30.44  | 30.37  | 30.37  | 30.43  | 30.31  | 30.33  | 30.47  |

**Table S2a.4.2** – Experimental data of **2a** and scaled chemical shifts of **2a-2h** at the PCM/mPW1PW91/6-311+G\*\*// B3LYP/6-31G\* level of theory

| DP4+     |        |               |        |        |        |        |        |        |        |  |
|----------|--------|---------------|--------|--------|--------|--------|--------|--------|--------|--|
| Compound |        | 2a            | 2b     | 2c     | 2d     | 2e     | 2f     | 2g     | 2h     |  |
| Nuclei   | Exp 2a | Scaled shifts |        |        |        |        |        |        |        |  |
| C8       | 37.73  | 40.83         | 40.95  | 40.87  | 39.09  | 39.87  | 41.16  | 40.12  | 40.16  |  |
| C7       | 131.67 | 130.39        | 130.32 | 128.95 | 124.72 | 124.69 | 130.05 | 124.20 | 125.83 |  |
| C6       | 138.22 | 135.00        | 134.87 | 136.85 | 140.53 | 138.90 | 137.88 | 138.07 | 137.87 |  |
| C5       | 59.58  | 63.32         | 53.82  | 60.70  | 60.26  | 61.06  | 51.44  | 58.88  | 56.61  |  |
| C4       | 41.8   | 37.70         | 37.32  | 37.32  | 37.69  | 38.80  | 35.96  | 37.19  | 35.86  |  |
| C3       | 52.72  | 63.51         | 63.55  | 63.73  | 66.95  | 65.10  | 62.07  | 67.04  | 66.49  |  |
| C2       | 41.03  | 40.05         | 40.44  | 40.86  | 39.55  | 40.57  | 40.22  | 44.65  | 41.57  |  |
| C1       | 60.65  | 63.93         | 73.65  | 64.74  | 65.05  | 69.26  | 69.77  | 71.88  | 73.46  |  |
| C9       | 28.6   | 15.40         | 15.12  | 16.68  | 18.40  | 14.31  | 21.25  | 8.53   | 15.77  |  |
| C10      | 20.63  |               |        |        |        |        |        |        |        |  |
| H8a      | 4.16   | 4.07          | 4.04   | 4.29   | 4.10   | 4.02   | 4.25   | 4.01   | 4.27   |  |
| H8b      | 4.02   | 4.10          | 4.13   | 4.49   | 4.11   | 4.02   | 4.36   | 4.03   | 4.30   |  |
| H7       | 6.03   | 6.08          | 6.05   | 6.39   | 6.15   | 6.13   | 6.31   | 6.14   | 5.99   |  |
| H5       | 4.65   | 4.66          | 4.94   | 4.60   | 5.21   | 4.94   | 4.95   | 5.02   | 4.97   |  |
| H4a      | 2.65   | 2.49          | 2.45   | 2.44   | 2.41   | 2.32   | 2.60   | 2.39   | 2.41   |  |
| H4b      | 2.5    | 2.51          | 2.58   | 2.64   | 2.48   | 2.59   | 2.68   | 2.47   | 2.55   |  |
| H3       | 4.83   | 4.87          | 4.94   | 4.13   | 4.26   | 4.57   | 4.22   | 4.52   | 4.28   |  |
| H1       | 4.73   | 4.69          | 4.37   | 4.54   | 4.69   | 4.79   | 4.28   | 4.77   | 4.81   |  |
| Me-9     | 1.33   | 1.08          | 1.08   | 1.09   | 1.14   | 1.17   | 0.95   | 1.10   | 1.08   |  |
| Me-10    | 1.02   | 1.38          | 1.35   | 1.30   | 1.37   | 1.36   | 1.33   | 1.47   | 1.27   |  |

**Table S2b.4.2** – Experimental data of **2b** and scaled chemical shifts of **2a-2h** at the PCM/mPW1PW91/6-311+G\*\*// B3LYP/6-31G\* level of theory

| DP4+     |        |               |        |        |        |        |        |        |        |  |
|----------|--------|---------------|--------|--------|--------|--------|--------|--------|--------|--|
| Compound |        | 2a            | 2b     | 2c     | 2d     | 2e     | 2f     | 2g     | 2h     |  |
| Nuclei   | Exp 2b | Scaled shifts |        |        |        |        |        |        |        |  |
| C8       | 37.62  | 40.54         | 40.90  | 40.62  | 38.83  | 39.66  | 41.09  | 39.98  | 40.07  |  |
| C7       | 131.89 | 131.17        | 130.29 | 129.58 | 125.28 | 125.11 | 130.08 | 124.42 | 125.91 |  |
| C6       | 137.83 | 135.84        | 134.83 | 137.56 | 141.25 | 139.44 | 137.93 | 138.36 | 137.98 |  |
| C5       | 50.44  | 63.29         | 53.77  | 60.64  | 60.21  | 61.01  | 51.38  | 58.82  | 56.55  |  |
| C4       | 41.32  | 37.37         | 37.27  | 37.04  | 37.41  | 38.58  | 35.88  | 37.04  | 35.76  |  |
| C3       | 52.7   | 63.49         | 63.50  | 63.71  | 66.95  | 65.08  | 62.02  | 67.02  | 66.45  |  |
| C2       | 41.36  | 39.74         | 40.39  | 40.60  | 39.29  | 40.37  | 40.15  | 44.53  | 41.49  |  |

|       |       |       |       |       |       |       |       |       |       |
|-------|-------|-------|-------|-------|-------|-------|-------|-------|-------|
| C1    | 69.98 | 63.91 | 73.60 | 64.72 | 65.04 | 69.27 | 69.73 | 71.88 | 73.44 |
| C9    | 28.53 | 14.80 | 15.06 | 16.19 | 17.93 | 13.91 | 21.15 | 8.26  | 15.63 |
| C10   | 20.47 | 21.98 | 22.53 | 21.49 | 19.94 | 19.72 | 22.74 | 21.84 | 18.86 |
| H8a   | 4.18  | 4.06  | 4.03  | 4.28  | 4.09  | 4.01  | 4.24  | 4.00  | 4.26  |
| H8b   | 4.04  | 4.10  | 4.12  | 4.49  | 4.10  | 4.02  | 4.35  | 4.02  | 4.29  |
| H7    | 5.95  | 6.09  | 6.03  | 6.39  | 6.14  | 6.13  | 6.28  | 6.14  | 5.98  |
| H5    | 4.97  | 4.65  | 4.92  | 4.60  | 5.19  | 4.94  | 4.94  | 5.01  | 4.96  |
| H4a   | 2.68  | 2.48  | 2.45  | 2.43  | 2.41  | 2.32  | 2.60  | 2.38  | 2.40  |
| H4b   | 2.53  | 2.49  | 2.57  | 2.63  | 2.48  | 2.59  | 2.68  | 2.46  | 2.54  |
| H3    | 4.83  | 4.87  | 4.93  | 4.12  | 4.25  | 4.56  | 4.21  | 4.51  | 4.27  |
| H1    | 4.38  | 4.68  | 4.35  | 4.53  | 4.68  | 4.78  | 4.27  | 4.77  | 4.80  |
| Me-9  | 1.28  | 1.06  | 1.09  | 1.08  | 1.14  | 1.16  | 0.96  | 1.09  | 1.08  |
| Me-10 | 1.01  | 1.37  | 1.36  | 1.29  | 1.37  | 1.35  | 1.33  | 1.47  | 1.26  |

### 3. Isomers of 3

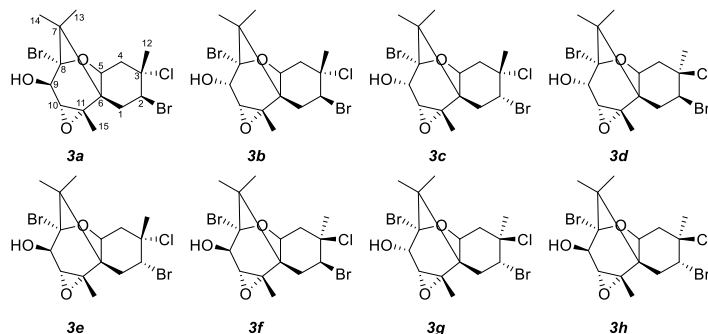

A. A. L. Gunatilaka, V. J. Paul, P. U. Park, M. P. Puglisi, A. D. Gitler, D. S. Eggleston, R. C. Haltiwanger, D. G. I. Kingston, *J. Nat. Prod.* **1999**, *62*, 1376–1378.

**Table S3.1.1** – Experimental data of **3a** and calculated isotropic shielding constants of **3a–3h** at the PCM/mPW1PW91/6-31+G\*\*// B3LYP/6-31G\* level of theory.

|          |       | DP4+                          |        |        |        |        |        |        |        |
|----------|-------|-------------------------------|--------|--------|--------|--------|--------|--------|--------|
| Compound |       | 3a                            | 3b     | 3c     | 3d     | 3e     | 3f     | 3g     | 3h     |
| Nuclei   | Exp   | Isotropic shielding constants |        |        |        |        |        |        |        |
| C1       | 33.6  | 159.58                        | 159.20 | 159.76 | 159.35 | 158.69 | 160.44 | 159.14 | 159.23 |
| C2       | 58.1  | 121.46                        | 121.51 | 122.62 | 125.40 | 122.37 | 125.20 | 122.01 | 120.99 |
| C3       | 68.0  | 116.16                        | 115.88 | 115.59 | 114.74 | 115.51 | 114.69 | 116.00 | 116.15 |
| C4       | 45.2  | 148.63                        | 148.44 | 149.04 | 148.27 | 148.55 | 148.26 | 148.37 | 148.00 |
| C5       | 74.2  | 119.46                        | 119.78 | 119.05 | 120.00 | 118.37 | 120.19 | 119.15 | 118.54 |
| C6       | 50.4  | 141.02                        | 141.14 | 143.26 | 140.20 | 142.34 | 140.19 | 142.77 | 143.07 |
| C7       | 49.3  | 143.09                        | 142.96 | 142.11 | 142.01 | 142.73 | 144.31 | 140.90 | 143.53 |
| C8       | 112.6 | 63.61                         | 72.82  | 71.99  | 72.93  | 62.72  | 65.79  | 71.77  | 63.75  |
| C9       | 73.8  | 118.77                        | 119.36 | 119.96 | 119.03 | 118.96 | 119.04 | 119.01 | 119.11 |
| C10      | 61.0  | 131.71                        | 133.29 | 130.87 | 133.22 | 129.95 | 132.35 | 130.57 | 130.54 |
| C11      | 61.0  | 131.86                        | 129.31 | 126.90 | 128.78 | 129.20 | 131.08 | 126.73 | 129.30 |
| C12      | 31.0  | 165.38                        | 165.29 | 163.86 | 164.74 | 163.53 | 164.75 | 171.88 | 172.22 |
| C13      | 24.6  | 170.00                        | 169.85 | 167.63 | 169.37 | 168.39 | 169.87 | 167.96 | 167.53 |
| C14      | 18.2  | 176.81                        | 178.35 | 178.68 | 177.63 | 177.46 | 176.48 | 177.66 | 176.78 |
| C15      | 21.5  | 173.48                        | 173.95 | 174.34 | 173.40 | 174.12 | 172.89 | 174.69 | 174.41 |
| H1a      | 2.92  | 29.45                         | 29.42  | 28.83  | 29.06  | 28.89  | 29.07  | 29.16  | 29.11  |
| H1b      | 2.13  | 29.52                         | 29.53  | 29.33  | 29.64  | 29.34  | 29.61  | 29.27  | 29.15  |
| H2       | 4.22  | 26.91                         | 26.91  | 26.86  | 27.43  | 26.86  | 27.46  | 26.57  | 26.65  |
| H4a      | 2.45  | 29.03                         | 29.04  | 28.89  | 28.84  | 28.81  | 28.91  | 28.79  | 28.83  |
| H4b      | 2.23  | 29.14                         | 29.14  | 29.58  | 28.94  | 29.53  | 28.96  | 29.17  | 29.25  |
| H5       | 4.58  | 26.82                         | 26.89  | 26.91  | 27.27  | 26.69  | 27.17  | 27.12  | 27.01  |
| H8       | 4.00  | 27.49                         | 27.58  | 27.72  | 27.55  | 27.56  | 27.68  | 27.70  | 27.66  |
| H10      | 3.16  | 28.32                         | 28.43  | 28.45  | 28.45  | 28.40  | 28.33  | 28.60  | 28.49  |
| Me-12    | 1.64  | 29.84                         | 29.83  | 29.85  | 29.85  | 29.84  | 29.86  | 29.82  | 29.83  |
| Me-13    | 1.20  | 30.34                         | 30.34  | 30.28  | 30.21  | 30.32  | 30.34  | 30.16  | 30.21  |
| Me-14    | 1.11  | 30.48                         | 30.47  | 30.53  | 30.53  | 30.41  | 30.44  | 30.61  | 30.42  |
| Me-15    | 1.35  | 30.16                         | 30.15  | 30.15  | 30.11  | 30.17  | 30.11  | 30.24  | 30.19  |

**Table S3.1.2** – Experimental data of **3a** and scaled chemical shifts of **3a-3h** at the PCM/mPW1PW91/6-31+G\*\*// B3LYP/6-31G\* level of theory.

| DP4+     |       |               |        |        |        |        |        |        |        |
|----------|-------|---------------|--------|--------|--------|--------|--------|--------|--------|
| Compound |       | 3a            | 3b     | 3c     | 3d     | 3e     | 3f     | 3g     | 3h     |
| Nuclei   | Exp   | Scaled shifts |        |        |        |        |        |        |        |
| C1       | 33.6  | 34.34         | 34.35  | 33.60  | 33.96  | 34.74  | 33.53  | 34.63  | 34.99  |
| C2       | 58.1  | 66.94         | 68.28  | 66.89  | 64.75  | 65.62  | 64.21  | 67.35  | 67.26  |
| C3       | 68.0  | 71.47         | 73.34  | 73.19  | 74.41  | 71.46  | 73.36  | 72.65  | 71.34  |
| C4       | 45.2  | 43.70         | 44.04  | 43.21  | 44.00  | 43.36  | 44.13  | 44.12  | 44.47  |
| C5       | 74.2  | 68.65         | 69.84  | 70.09  | 69.65  | 69.02  | 68.58  | 69.87  | 69.33  |
| C6       | 50.4  | 50.21         | 50.61  | 48.39  | 51.32  | 48.64  | 51.16  | 49.06  | 48.63  |
| C7       | 49.3  | 48.44         | 48.97  | 49.42  | 49.69  | 48.31  | 47.57  | 50.70  | 48.24  |
| C8       | 112.6 | 116.41        | 112.11 | 112.27 | 112.34 | 116.34 | 115.94 | 111.63 | 115.56 |
| C9       | 73.8  | 69.24         | 70.21  | 69.27  | 70.53  | 68.52  | 69.57  | 70.00  | 68.84  |
| C10      | 61.0  | 58.17         | 57.67  | 59.49  | 57.65  | 59.17  | 57.99  | 59.81  | 59.20  |
| C11      | 61.0  | 58.05         | 61.26  | 63.05  | 61.69  | 59.81  | 59.10  | 63.19  | 60.25  |
| C12      | 31.0  | 29.38         | 28.87  | 29.92  | 29.07  | 30.63  | 29.78  | 23.40  | 24.03  |
| C13      | 24.6  | 25.43         | 24.76  | 26.54  | 24.86  | 26.49  | 25.32  | 26.86  | 27.99  |
| C14      | 18.2  | 19.61         | 17.11  | 16.64  | 17.38  | 18.78  | 19.56  | 18.31  | 20.18  |
| C15      | 21.5  | 22.45         | 21.07  | 20.53  | 21.21  | 21.62  | 22.69  | 20.93  | 22.18  |
| H1a      | 2.92  | 2.11          | 2.15   | 2.70   | 2.51   | 2.59   | 2.50   | 2.36   | 2.37   |
| H1b      | 2.13  | 2.04          | 2.05   | 2.21   | 1.88   | 2.17   | 1.92   | 2.25   | 2.33   |
| H2       | 4.22  | 4.54          | 4.60   | 4.61   | 4.27   | 4.50   | 4.23   | 4.91   | 4.81   |
| H4a      | 2.45  | 2.51          | 2.52   | 2.64   | 2.74   | 2.67   | 2.67   | 2.73   | 2.65   |
| H4b      | 2.23  | 2.41          | 2.42   | 1.97   | 2.64   | 2.00   | 2.62   | 2.35   | 2.24   |
| H5       | 4.58  | 4.63          | 4.62   | 4.56   | 4.44   | 4.66   | 4.55   | 4.37   | 4.46   |
| H8       | 4.00  | 3.98          | 3.95   | 3.78   | 4.14   | 3.85   | 4.00   | 3.80   | 3.81   |
| H10      | 3.16  | 3.20          | 3.11   | 3.07   | 3.17   | 3.05   | 3.30   | 2.91   | 2.99   |
| Me-12    | 1.64  | 1.74          | 1.75   | 1.70   | 1.65   | 1.70   | 1.65   | 1.71   | 1.66   |
| Me-13    | 1.20  | 1.26          | 1.25   | 1.29   | 1.26   | 1.25   | 1.14   | 1.38   | 1.29   |
| Me-14    | 1.11  | 1.13          | 1.13   | 1.05   | 0.91   | 1.16   | 1.02   | 0.93   | 1.08   |
| Me-15    | 1.35  | 1.43          | 1.44   | 1.42   | 1.37   | 1.39   | 1.38   | 1.29   | 1.30   |

**Table S3.1.3** – Experimental data of **3a** and scaled chemical of **3a-3h** at the PCM/mPW1PW91/6-31+G\*\*// B3LYP/6-31G\* level of theory, after excluding all the signals adjacent to bromine.

| DP4+     |      |               |       |       |       |       |       |       |       |
|----------|------|---------------|-------|-------|-------|-------|-------|-------|-------|
| Compound |      | 3a            | 3b    | 3c    | 3d    | 3e    | 3f    | 3g    | 3h    |
| Nuclei   | Exp  | Scaled shifts |       |       |       |       |       |       |       |
| C1       | 33.6 | 34.38         | 34.89 | 34.04 | 34.30 | 34.75 | 33.43 | 35.17 | 35.18 |
| C3       | 68.0 | 74.46         | 74.56 | 74.27 | 75.24 | 74.20 | 75.83 | 73.50 | 73.95 |
| C4       | 45.2 | 44.48         | 44.75 | 43.81 | 44.46 | 44.01 | 44.72 | 44.74 | 45.29 |
| C5       | 74.2 | 71.42         | 70.99 | 71.12 | 70.42 | 71.58 | 70.74 | 70.70 | 71.80 |
| C6       | 50.4 | 51.51         | 51.43 | 49.07 | 51.87 | 49.69 | 52.20 | 49.72 | 49.73 |
| C7       | 49.3 | 49.60         | 49.76 | 50.12 | 50.21 | 49.34 | 48.38 | 51.38 | 49.32 |
| C9       | 73.8 | 72.05         | 71.37 | 70.30 | 71.31 | 71.05 | 71.80 | 70.83 | 71.28 |
| C10      | 61.0 | 60.11         | 58.62 | 60.36 | 58.28 | 61.01 | 59.47 | 60.55 | 61.01 |
| C11      | 61.0 | 59.97         | 62.26 | 63.97 | 62.36 | 61.69 | 60.65 | 63.97 | 62.12 |
| C12      | 31.0 | 29.03         | 29.31 | 30.30 | 29.35 | 30.33 | 29.44 | 23.85 | 23.49 |
| C13      | 24.6 | 24.76         | 25.13 | 26.87 | 25.09 | 25.89 | 24.69 | 27.33 | 27.72 |
| C14      | 18.2 | 18.48         | 17.35 | 16.81 | 17.52 | 17.60 | 18.56 | 18.72 | 19.39 |
| C15      | 21.5 | 21.55         | 21.38 | 20.76 | 21.40 | 20.66 | 21.90 | 21.36 | 21.52 |
| H1a      | 2.92 | 2.13          | 2.17  | 2.75  | 2.52  | 2.63  | 2.50  | 2.42  | 2.42  |
| H1b      | 2.13 | 2.06          | 2.06  | 2.24  | 1.88  | 2.18  | 1.92  | 2.30  | 2.38  |
| H4a      | 2.45 | 2.55          | 2.56  | 2.69  | 2.75  | 2.70  | 2.67  | 2.83  | 2.73  |
| H4b      | 2.23 | 2.44          | 2.46  | 1.98  | 2.65  | 2.00  | 2.62  | 2.41  | 2.28  |
| H5       | 4.58 | 4.76          | 4.78  | 4.72  | 4.46  | 4.77  | 4.56  | 4.65  | 4.69  |
| H8       | 4.00 | 4.09          | 4.07  | 3.89  | 4.16  | 3.93  | 4.01  | 4.01  | 3.99  |
| H10      | 3.16 | 3.26          | 3.19  | 3.14  | 3.18  | 3.10  | 3.30  | 3.03  | 3.10  |
| Me-12    | 1.64 | 1.74          | 1.75  | 1.70  | 1.65  | 1.70  | 1.65  | 1.70  | 1.65  |
| Me-13    | 1.20 | 1.24          | 1.22  | 1.26  | 1.25  | 1.23  | 1.14  | 1.34  | 1.24  |
| Me-14    | 1.11 | 1.10          | 1.09  | 1.01  | 0.90  | 1.14  | 1.02  | 0.84  | 1.02  |
| Me-15    | 1.35 | 1.42          | 1.42  | 1.40  | 1.37  | 1.38  | 1.38  | 1.24  | 1.26  |

**Table S3.1.4** – Experimental data of **3a** and scaled chemical shifts of **3a-3h** at the PCM/mPW1PW91/6-31+G\*\*// B3LYP/6-31G\* level of theory, after excluding all the signals adjacent to bromine and chlorine.

| DP4+     |      |               |       |       |       |       |       |       |       |
|----------|------|---------------|-------|-------|-------|-------|-------|-------|-------|
| Compound |      | 3a            | 3b    | 3c    | 3d    | 3e    | 3f    | 3g    | 3h    |
| Nuclei   | Exp  | Scaled shifts |       |       |       |       |       |       |       |
| C1       | 33.6 | 34.55         | 35.08 | 34.20 | 34.48 | 34.92 | 33.59 | 35.34 | 35.36 |
| C4       | 45.2 | 45.01         | 45.29 | 44.30 | 45.06 | 44.50 | 45.37 | 45.19 | 45.80 |
| C5       | 74.2 | 72.90         | 72.49 | 72.56 | 72.05 | 73.02 | 72.53 | 71.94 | 73.18 |
| C6       | 50.4 | 52.29         | 52.21 | 49.74 | 52.76 | 50.37 | 53.18 | 50.32 | 50.39 |
| C7       | 49.3 | 50.31         | 50.49 | 50.83 | 51.04 | 50.01 | 49.19 | 52.03 | 49.96 |
| C9       | 73.8 | 73.56         | 72.88 | 71.70 | 72.98 | 72.46 | 73.63 | 72.07 | 72.65 |
| C10      | 61.0 | 61.19         | 59.66 | 61.42 | 59.43 | 62.08 | 60.77 | 61.49 | 62.03 |
| C11      | 61.0 | 61.05         | 63.44 | 65.16 | 63.67 | 62.78 | 62.00 | 65.00 | 63.18 |
| C12      | 31.0 | 29.00         | 29.30 | 30.33 | 29.33 | 30.35 | 29.43 | 23.67 | 23.29 |
| C13      | 24.6 | 24.58         | 24.97 | 26.77 | 24.91 | 25.76 | 24.47 | 27.26 | 27.65 |
| C14      | 18.2 | 18.08         | 16.91 | 16.36 | 17.03 | 17.19 | 18.08 | 18.38 | 19.05 |
| C15      | 21.5 | 21.26         | 21.08 | 20.45 | 21.06 | 20.35 | 21.56 | 21.10 | 21.26 |
| H1a      | 2.92 | 2.13          | 2.17  | 2.75  | 2.52  | 2.63  | 2.50  | 2.42  | 2.42  |
| H1b      | 2.13 | 2.06          | 2.06  | 2.24  | 1.88  | 2.18  | 1.92  | 2.30  | 2.38  |
| H4a      | 2.45 | 2.55          | 2.56  | 2.69  | 2.75  | 2.70  | 2.67  | 2.83  | 2.73  |
| H4b      | 2.23 | 2.44          | 2.46  | 1.98  | 2.65  | 2.00  | 2.62  | 2.41  | 2.28  |
| H5       | 4.58 | 4.76          | 4.78  | 4.72  | 4.46  | 4.77  | 4.56  | 4.65  | 4.69  |
| H8       | 4.00 | 4.09          | 4.07  | 3.89  | 4.16  | 3.93  | 4.01  | 4.01  | 3.99  |
| H10      | 3.16 | 3.26          | 3.19  | 3.14  | 3.18  | 3.10  | 3.30  | 3.03  | 3.10  |
| Me-12    | 1.64 | 1.74          | 1.75  | 1.70  | 1.65  | 1.70  | 1.65  | 1.70  | 1.65  |
| Me-13    | 1.20 | 1.24          | 1.22  | 1.26  | 1.25  | 1.23  | 1.14  | 1.34  | 1.24  |
| Me-14    | 1.11 | 1.10          | 1.09  | 1.01  | 0.90  | 1.14  | 1.02  | 0.84  | 1.02  |
| Me-15    | 1.35 | 1.42          | 1.42  | 1.40  | 1.37  | 1.38  | 1.38  | 1.24  | 1.26  |

**Table S3.1.5** – Experimental data of **3a** and scaled chemical shifts of **3a-3h** at the PCM/mPW1PW91/6-31+G\*\*// B3LYP/6-31G\* level of theory, after excluding all the carbon signals adjacent to bromine and chlorine.

| DP4+     |      |               |       |       |       |       |       |       |       |
|----------|------|---------------|-------|-------|-------|-------|-------|-------|-------|
| Compound |      | 3a            | 3b    | 3c    | 3d    | 3e    | 3f    | 3g    | 3h    |
| Nuclei   | Exp  | Scaled shifts |       |       |       |       |       |       |       |
| C1       | 33.6 | 34.55         | 35.08 | 34.20 | 34.48 | 34.92 | 33.59 | 35.34 | 35.36 |
| C4       | 45.2 | 45.01         | 45.29 | 44.30 | 45.06 | 44.50 | 45.37 | 45.19 | 45.80 |
| C5       | 74.2 | 72.90         | 72.49 | 72.56 | 72.05 | 73.02 | 72.53 | 71.94 | 73.18 |
| C6       | 50.4 | 52.29         | 52.21 | 49.74 | 52.76 | 50.37 | 53.18 | 50.32 | 50.39 |
| C7       | 49.3 | 50.31         | 50.49 | 50.83 | 51.04 | 50.01 | 49.19 | 52.03 | 49.96 |
| C9       | 73.8 | 73.56         | 72.88 | 71.70 | 72.98 | 72.46 | 73.63 | 72.07 | 72.65 |
| C10      | 61.0 | 61.19         | 59.66 | 61.42 | 59.43 | 62.08 | 60.77 | 61.49 | 62.03 |
| C11      | 61.0 | 61.05         | 63.44 | 65.16 | 63.67 | 62.78 | 62.00 | 65.00 | 63.18 |
| C12      | 31.0 | 29.00         | 29.30 | 30.33 | 29.33 | 30.35 | 29.43 | 23.67 | 23.29 |
| C13      | 24.6 | 24.58         | 24.97 | 26.77 | 24.91 | 25.76 | 24.47 | 27.26 | 27.65 |
| C14      | 18.2 | 18.08         | 16.91 | 16.36 | 17.03 | 17.19 | 18.08 | 18.38 | 19.05 |
| C15      | 21.5 | 21.26         | 21.08 | 20.45 | 21.06 | 20.35 | 21.56 | 21.10 | 21.26 |
| H1a      | 2.92 | 2.11          | 2.15  | 2.70  | 2.51  | 2.59  | 2.50  | 2.36  | 2.37  |
| H1b      | 2.13 | 2.04          | 2.05  | 2.21  | 1.88  | 2.17  | 1.92  | 2.25  | 2.33  |
| H2       | 4.22 | 4.54          | 4.60  | 4.61  | 4.27  | 4.50  | 4.23  | 4.91  | 4.81  |
| H4a      | 2.45 | 2.51          | 2.52  | 2.64  | 2.74  | 2.67  | 2.67  | 2.73  | 2.65  |
| H4b      | 2.23 | 2.41          | 2.42  | 1.97  | 2.64  | 2.00  | 2.62  | 2.35  | 2.24  |
| H5       | 4.58 | 4.63          | 4.62  | 4.56  | 4.44  | 4.66  | 4.55  | 4.37  | 4.46  |
| H8       | 4.00 | 3.98          | 3.95  | 3.78  | 4.14  | 3.85  | 4.00  | 3.80  | 3.81  |
| H10      | 3.16 | 3.20          | 3.11  | 3.07  | 3.17  | 3.05  | 3.30  | 2.91  | 2.99  |
| Me-12    | 1.64 | 1.74          | 1.75  | 1.70  | 1.65  | 1.70  | 1.65  | 1.71  | 1.66  |
| Me-13    | 1.20 | 1.26          | 1.25  | 1.29  | 1.26  | 1.25  | 1.14  | 1.38  | 1.29  |
| Me-14    | 1.11 | 1.13          | 1.13  | 1.05  | 0.91  | 1.16  | 1.02  | 0.93  | 1.08  |
| Me-15    | 1.35 | 1.43          | 1.44  | 1.42  | 1.37  | 1.39  | 1.38  | 1.29  | 1.30  |

**Table S3.2.1** – Experimental data of **3a** and calculated isotropic shielding constants of **3a-3h** at the B3LYP/6-31G\*\*//MMFF level of theory.

| DP4 |  |  |  |  |  |  |  |  |  |
|-----|--|--|--|--|--|--|--|--|--|
|-----|--|--|--|--|--|--|--|--|--|

| Compound |        | 3a                            | 3b     | 3c     | 3d     | 3e     | 3f     | 3g     | 3h     |
|----------|--------|-------------------------------|--------|--------|--------|--------|--------|--------|--------|
| Nuclei   | Exp    | Isotropic shielding constants |        |        |        |        |        |        |        |
| C1       | 33.60  | 153.99                        | 154.03 | 154.38 | 155.02 | 154.36 | 154.99 | 153.61 | 153.41 |
| C2       | 58.10  | 122.98                        | 123.22 | 121.85 | 125.82 | 121.61 | 125.57 | 120.92 | 120.64 |
| C3       | 68.00  | 120.55                        | 120.60 | 120.09 | 117.95 | 119.96 | 117.85 | 118.85 | 118.68 |
| C4       | 45.20  | 142.74                        | 142.92 | 142.21 | 141.89 | 141.88 | 141.66 | 140.95 | 140.60 |
| C5       | 74.20  | 118.32                        | 118.67 | 117.55 | 118.59 | 117.06 | 118.25 | 116.77 | 116.21 |
| C6       | 50.40  | 135.69                        | 135.66 | 136.72 | 135.08 | 136.43 | 135.10 | 137.18 | 136.89 |
| C7       | 49.30  | 138.37                        | 136.97 | 136.38 | 136.99 | 138.05 | 138.36 | 136.40 | 138.14 |
| C8       | 112.60 | 61.17                         | 70.22  | 69.81  | 69.92  | 61.37  | 61.03  | 70.32  | 61.85  |
| C9       | 73.80  | 116.20                        | 113.38 | 113.63 | 113.33 | 115.92 | 116.18 | 113.77 | 116.04 |
| C10      | 61.00  | 132.85                        | 132.51 | 129.64 | 132.50 | 130.26 | 132.85 | 129.49 | 130.06 |
| C11      | 61.00  | 130.86                        | 128.70 | 126.78 | 128.79 | 128.57 | 130.84 | 127.21 | 129.04 |
| C12      | 31.00  | 159.58                        | 159.65 | 157.84 | 158.34 | 157.82 | 158.32 | 166.30 | 166.26 |
| C14      | 18.20  | 171.83                        | 172.64 | 173.08 | 172.72 | 172.07 | 171.80 | 173.15 | 172.08 |
| C13      | 24.60  | 166.11                        | 166.18 | 165.16 | 166.11 | 165.13 | 166.05 | 164.91 | 164.90 |
| C15      | 21.50  | 170.60                        | 170.89 | 171.85 | 170.84 | 171.62 | 170.53 | 171.70 | 171.42 |
| H1b      | 2.13   | 29.70                         | 29.73  | 29.74  | 29.79  | 29.67  | 29.76  | 29.54  | 29.48  |
| H1a      | 2.92   | 29.63                         | 29.67  | 29.15  | 29.26  | 29.13  | 29.24  | 29.46  | 29.44  |
| H2       | 4.22   | 27.25                         | 27.28  | 27.31  | 27.68  | 27.32  | 27.66  | 27.11  | 27.09  |
| H4b      | 2.23   | 29.74                         | 29.70  | 29.89  | 29.27  | 29.96  | 29.31  | 29.53  | 29.58  |
| H4a      | 2.45   | 29.35                         | 29.31  | 29.10  | 29.26  | 29.12  | 29.30  | 29.10  | 29.12  |
| H5       | 4.58   | 26.86                         | 26.97  | 26.94  | 27.43  | 26.82  | 27.34  | 27.24  | 27.13  |
| H9       | 4.00   | 27.61                         | 27.69  | 27.85  | 27.70  | 27.63  | 27.66  | 27.85  | 27.66  |
| H10      | 3.16   | 28.91                         | 29.06  | 29.11  | 29.08  | 28.96  | 28.93  | 29.11  | 28.96  |
| Me-12    | 1.64   | 30.20                         | 30.19  | 30.21  | 30.20  | 30.22  | 30.21  | 30.14  | 30.14  |
| Me-13    | 1.11   | 30.54                         | 30.67  | 30.68  | 30.66  | 30.60  | 30.50  | 30.70  | 30.53  |
| Me-14    | 1.20   | 30.52                         | 30.53  | 30.57  | 30.43  | 30.52  | 30.45  | 30.47  | 30.50  |
| Me-15    | 1.35   | 30.42                         | 30.45  | 30.54  | 30.46  | 30.50  | 30.43  | 30.59  | 30.55  |

**Table S3.2.2** – Experimental data of **3a** and scaled chemical shifts of **3a-3h** at the B3LYP/6-31G\*\*//MMFF level of theory.

| DP4      |        |               |        |        |        |        |        |        |        |
|----------|--------|---------------|--------|--------|--------|--------|--------|--------|--------|
| Compound |        | 3a            | 3b     | 3c     | 3d     | 3e     | 3f     | 3g     | 3h     |
| Nuclei   | Exp    | Scaled shifts |        |        |        |        |        |        |        |
| C1       | 33.60  | 36.09         | 35.58  | 34.82  | 34.55  | 35.28  | 35.08  | 36.08  | 36.61  |
| C2       | 58.10  | 63.99         | 64.59  | 65.19  | 61.97  | 64.57  | 61.49  | 66.12  | 65.47  |
| C3       | 68.00  | 66.17         | 67.06  | 66.83  | 69.36  | 66.04  | 68.43  | 68.02  | 67.20  |
| C4       | 45.20  | 46.21         | 46.04  | 46.18  | 46.88  | 46.44  | 47.05  | 47.71  | 47.89  |
| C5       | 74.20  | 68.19         | 68.89  | 69.20  | 68.76  | 68.64  | 68.07  | 69.93  | 69.37  |
| C6       | 50.40  | 52.56         | 52.88  | 51.30  | 53.27  | 51.31  | 52.94  | 51.18  | 51.16  |
| C7       | 49.30  | 50.14         | 51.64  | 51.62  | 51.48  | 49.86  | 50.01  | 51.89  | 50.06  |
| C8       | 112.60 | 119.61        | 114.52 | 113.78 | 114.47 | 118.44 | 119.47 | 112.60 | 117.25 |
| C9       | 73.80  | 70.09         | 73.87  | 72.87  | 73.70  | 69.65  | 69.93  | 72.68  | 69.52  |
| C10      | 61.00  | 55.11         | 55.84  | 57.91  | 55.70  | 56.83  | 54.96  | 58.24  | 57.18  |
| C11      | 61.00  | 56.90         | 59.44  | 60.59  | 59.18  | 58.34  | 56.77  | 60.34  | 58.07  |
| C12      | 31.00  | 31.06         | 30.28  | 31.59  | 31.43  | 32.18  | 32.08  | 24.43  | 25.30  |
| C14      | 18.20  | 20.04         | 18.05  | 17.36  | 17.93  | 19.43  | 19.97  | 18.13  | 20.17  |
| C13      | 24.60  | 25.18         | 24.13  | 24.75  | 24.13  | 25.64  | 25.13  | 25.70  | 26.49  |
| C15      | 21.50  | 21.15         | 19.69  | 18.51  | 19.70  | 19.84  | 21.12  | 19.46  | 20.75  |
| H1b      | 2.13   | 2.13          | 2.14   | 2.12   | 2.02   | 2.15   | 2.02   | 2.28   | 2.29   |
| H1a      | 2.92   | 2.20          | 2.20   | 2.69   | 2.59   | 2.65   | 2.58   | 2.36   | 2.33   |
| H2       | 4.22   | 4.46          | 4.50   | 4.44   | 4.29   | 4.34   | 4.26   | 4.70   | 4.62   |
| H4b      | 2.23   | 2.09          | 2.17   | 1.98   | 2.58   | 1.88   | 2.50   | 2.29   | 2.20   |
| H4a      | 2.45   | 2.47          | 2.54   | 2.73   | 2.59   | 2.66   | 2.51   | 2.72   | 2.65   |
| H5       | 4.58   | 4.83          | 4.80   | 4.79   | 4.56   | 4.80   | 4.60   | 4.57   | 4.58   |
| H9       | 4.00   | 4.12          | 4.11   | 3.92   | 4.27   | 4.05   | 4.26   | 3.96   | 4.06   |
| H10      | 3.16   | 2.88          | 2.79   | 2.73   | 2.78   | 2.81   | 2.90   | 2.71   | 2.80   |
| Me-12    | 1.64   | 1.66          | 1.70   | 1.68   | 1.58   | 1.63   | 1.54   | 1.69   | 1.65   |
| Me-13    | 1.11   | 1.33          | 1.23   | 1.22   | 1.09   | 1.29   | 1.23   | 1.13   | 1.26   |
| Me-14    | 1.20   | 1.36          | 1.37   | 1.33   | 1.33   | 1.36   | 1.28   | 1.35   | 1.30   |
| Me-15    | 1.35   | 1.45          | 1.45   | 1.36   | 1.30   | 1.38   | 1.31   | 1.24   | 1.25   |

**Table S3.2.3** – Experimental data of **3a** and scaled chemical shifts of **3a-3h** at the B3LYP/6-31G\*\*//MMFF level of theory, after excluding all the signals adjacent to bromine.

| DP4 |  |  |  |  |  |  |  |  |  |
|-----|--|--|--|--|--|--|--|--|--|
|-----|--|--|--|--|--|--|--|--|--|

| Compound |       | 3a            | 3b    | 3c    | 3d    | 3e    | 3f    | 3g    | 3h    |
|----------|-------|---------------|-------|-------|-------|-------|-------|-------|-------|
| Nuclei   | Exp   | Scaled shifts |       |       |       |       |       |       |       |
| C1       | 33.60 | 35.84         | 35.75 | 35.06 | 34.55 | 35.07 | 34.58 | 36.50 | 36.69 |
| C3       | 68.00 | 69.67         | 68.61 | 68.17 | 70.62 | 69.10 | 71.77 | 69.04 | 69.99 |
| C4       | 45.20 | 47.22         | 46.67 | 46.81 | 47.33 | 47.42 | 47.93 | 48.35 | 48.97 |
| C5       | 74.20 | 71.94         | 70.51 | 70.61 | 70.00 | 71.98 | 71.37 | 70.99 | 72.37 |
| C6       | 50.40 | 54.36         | 53.81 | 52.10 | 53.95 | 52.81 | 54.49 | 51.88 | 52.53 |
| C7       | 49.30 | 51.64         | 52.52 | 52.43 | 52.10 | 51.21 | 51.23 | 52.61 | 51.33 |
| C9       | 73.80 | 74.08         | 75.71 | 74.40 | 75.12 | 73.10 | 73.45 | 73.79 | 72.53 |
| C10      | 61.00 | 57.23         | 56.90 | 58.94 | 56.47 | 58.91 | 56.74 | 59.08 | 59.08 |
| C11      | 61.00 | 59.24         | 60.65 | 61.71 | 60.08 | 60.59 | 58.76 | 61.22 | 60.06 |
| C12      | 31.00 | 30.19         | 30.22 | 31.72 | 31.33 | 31.64 | 31.24 | 24.63 | 24.37 |
| C14      | 18.20 | 17.79         | 17.46 | 17.00 | 17.33 | 17.55 | 17.74 | 18.21 | 18.79 |
| C13      | 24.60 | 23.57         | 23.81 | 24.65 | 23.76 | 24.41 | 23.49 | 25.92 | 25.67 |
| C15      | 21.50 | 19.03         | 19.17 | 18.19 | 19.16 | 17.99 | 19.01 | 19.57 | 19.42 |
| H1b      | 2.13  | 2.15          | 2.16  | 2.13  | 2.03  | 2.15  | 2.02  | 2.32  | 2.32  |
| H1a      | 2.92  | 2.22          | 2.22  | 2.72  | 2.60  | 2.67  | 2.58  | 2.40  | 2.36  |
| H4b      | 2.23  | 2.11          | 2.18  | 1.99  | 2.59  | 1.88  | 2.50  | 2.33  | 2.22  |
| H4a      | 2.45  | 2.49          | 2.57  | 2.76  | 2.60  | 2.67  | 2.52  | 2.79  | 2.70  |
| H5       | 4.58  | 4.93          | 4.92  | 4.88  | 4.59  | 4.85  | 4.61  | 4.77  | 4.74  |
| H9       | 4.00  | 4.20          | 4.20  | 3.99  | 4.30  | 4.09  | 4.27  | 4.11  | 4.19  |
| H10      | 3.16  | 2.92          | 2.83  | 2.76  | 2.79  | 2.83  | 2.91  | 2.78  | 2.86  |
| Me-12    | 1.64  | 1.66          | 1.70  | 1.67  | 1.58  | 1.63  | 1.54  | 1.68  | 1.64  |
| Me-13    | 1.20  | 1.34          | 1.36  | 1.32  | 1.33  | 1.35  | 1.28  | 1.32  | 1.27  |
| Me-14    | 1.11  | 1.32          | 1.21  | 1.20  | 1.08  | 1.28  | 1.23  | 1.08  | 1.24  |
| Me-15    | 1.35  | 1.44          | 1.43  | 1.35  | 1.30  | 1.37  | 1.30  | 1.20  | 1.22  |

**Table S3.2.4** – Experimental data of **3a** and scaled chemical shifts of **3a-3h** at the B3LYP/6-31G\*\*//MMFF level of theory, after excluding all the signals adjacent to bromine and chlorine.

| DP4      |      |               |       |       |       |       |       |       |       |
|----------|------|---------------|-------|-------|-------|-------|-------|-------|-------|
| Compound |      | 3a            | 3b    | 3c    | 3d    | 3e    | 3f    | 3g    | 3h    |
| Nuclei   | Exp  | Scaled shifts |       |       |       |       |       |       |       |
| C1       | 33.6 | 35.90         | 35.77 | 35.06 | 34.62 | 35.11 | 34.68 | 36.54 | 36.77 |
| C4       | 45.2 | 47.38         | 46.73 | 46.82 | 47.58 | 47.53 | 48.30 | 48.46 | 49.18 |
| C5       | 74.2 | 72.32         | 70.65 | 70.65 | 70.57 | 72.23 | 72.22 | 71.22 | 72.82 |
| C6       | 50.4 | 54.58         | 53.89 | 52.12 | 54.30 | 52.95 | 55.00 | 52.01 | 52.78 |
| C7       | 49.3 | 51.84         | 52.59 | 52.45 | 52.42 | 51.34 | 51.67 | 52.74 | 51.56 |
| C9       | 73.8 | 74.48         | 75.86 | 74.44 | 75.77 | 73.36 | 74.34 | 74.04 | 72.99 |
| C10      | 61.0 | 57.48         | 56.99 | 58.97 | 56.85 | 59.08 | 57.30 | 59.25 | 59.40 |
| C11      | 61.0 | 59.51         | 60.75 | 61.74 | 60.51 | 60.77 | 59.36 | 61.39 | 60.39 |
| C12      | 31.0 | 30.19         | 30.23 | 31.72 | 31.35 | 31.66 | 31.27 | 24.60 | 24.31 |
| C14      | 18.2 | 17.68         | 17.42 | 16.99 | 17.15 | 17.47 | 17.49 | 18.15 | 18.67 |
| C13      | 24.6 | 23.51         | 23.79 | 24.64 | 23.68 | 24.38 | 23.36 | 25.90 | 25.63 |
| C15      | 21.5 | 18.93         | 19.14 | 18.18 | 19.01 | 17.93 | 18.79 | 19.51 | 19.31 |
| H1b      | 2.13 | 2.15          | 2.16  | 2.13  | 2.03  | 2.15  | 2.02  | 2.32  | 2.32  |
| H1a      | 2.92 | 2.22          | 2.22  | 2.72  | 2.60  | 2.67  | 2.58  | 2.40  | 2.36  |
| H4b      | 2.23 | 2.11          | 2.18  | 1.99  | 2.59  | 1.88  | 2.50  | 2.33  | 2.22  |
| H4a      | 2.45 | 2.49          | 2.57  | 2.76  | 2.60  | 2.67  | 2.52  | 2.79  | 2.70  |
| H5       | 4.58 | 4.93          | 4.92  | 4.88  | 4.59  | 4.85  | 4.61  | 4.77  | 4.74  |
| H9       | 4.00 | 4.20          | 4.20  | 3.99  | 4.30  | 4.09  | 4.27  | 4.11  | 4.19  |
| H10      | 3.16 | 2.92          | 2.83  | 2.76  | 2.79  | 2.83  | 2.91  | 2.78  | 2.86  |
| Me-12    | 1.64 | 1.66          | 1.70  | 1.67  | 1.58  | 1.63  | 1.54  | 1.68  | 1.64  |
| Me-13    | 1.20 | 1.34          | 1.36  | 1.32  | 1.33  | 1.35  | 1.28  | 1.32  | 1.27  |
| Me-14    | 1.11 | 1.32          | 1.21  | 1.20  | 1.08  | 1.28  | 1.23  | 1.08  | 1.24  |
| Me-15    | 1.35 | 1.44          | 1.43  | 1.35  | 1.30  | 1.37  | 1.30  | 1.20  | 1.22  |

**Table S3.2.5** – Experimental data of **3a** and scaled chemical shifts of **3a-3h** at the B3LYP/6-31G\*\*//MMFF level of theory, after excluding all the carbon signals adjacent to bromine and chlorine.

| DP4      |      |               |       |       |       |       |       |       |       |
|----------|------|---------------|-------|-------|-------|-------|-------|-------|-------|
| Compound |      | 3a            | 3b    | 3c    | 3d    | 3e    | 3f    | 3g    | 3h    |
| Nuclei   | Exp  | Scaled shifts |       |       |       |       |       |       |       |
| C1       | 33.6 | 35.90         | 35.77 | 35.06 | 34.62 | 35.11 | 34.68 | 36.54 | 36.77 |
| C4       | 45.2 | 47.38         | 46.73 | 46.82 | 47.58 | 47.53 | 48.30 | 48.46 | 49.18 |
| C5       | 74.2 | 72.32         | 70.65 | 70.65 | 70.57 | 72.23 | 72.22 | 71.22 | 72.82 |
| C6       | 50.4 | 54.58         | 53.89 | 52.12 | 54.30 | 52.95 | 55.00 | 52.01 | 52.78 |
| C7       | 49.3 | 51.84         | 52.59 | 52.45 | 52.42 | 51.34 | 51.67 | 52.74 | 51.56 |



|       |      |       |       |       |       |       |       |       |       |
|-------|------|-------|-------|-------|-------|-------|-------|-------|-------|
| C9    | 73.8 | 74.48 | 75.86 | 74.44 | 75.77 | 73.36 | 74.34 | 74.04 | 72.99 |
| C10   | 61.0 | 57.48 | 56.99 | 58.97 | 56.85 | 59.08 | 57.30 | 59.25 | 59.40 |
| C11   | 61.0 | 59.51 | 60.75 | 61.74 | 60.51 | 60.77 | 59.36 | 61.39 | 60.39 |
| C12   | 31.0 | 30.19 | 30.23 | 31.72 | 31.35 | 31.66 | 31.27 | 24.60 | 24.31 |
| C14   | 18.2 | 17.68 | 17.42 | 16.99 | 17.15 | 17.47 | 17.49 | 18.15 | 18.67 |
| C13   | 24.6 | 23.51 | 23.79 | 24.64 | 23.68 | 24.38 | 23.36 | 25.90 | 25.63 |
| C15   | 21.5 | 18.93 | 19.14 | 18.18 | 19.01 | 17.93 | 18.79 | 19.51 | 19.31 |
| H1b   | 2.13 | 2.13  | 2.14  | 2.12  | 2.02  | 2.15  | 2.02  | 2.28  | 2.29  |
| H1a   | 2.92 | 2.20  | 2.20  | 2.69  | 2.59  | 2.65  | 2.58  | 2.36  | 2.33  |
| H2    | 4.22 | 4.46  | 4.50  | 4.44  | 4.29  | 4.34  | 4.26  | 4.70  | 4.62  |
| H4b   | 2.23 | 2.09  | 2.17  | 1.98  | 2.58  | 1.88  | 2.50  | 2.29  | 2.20  |
| H4a   | 2.45 | 2.47  | 2.54  | 2.73  | 2.59  | 2.66  | 2.51  | 2.72  | 2.65  |
| H5    | 4.58 | 4.83  | 4.80  | 4.79  | 4.56  | 4.80  | 4.60  | 4.57  | 4.58  |
| H9    | 4.00 | 4.12  | 4.11  | 3.92  | 4.27  | 4.05  | 4.26  | 3.96  | 4.06  |
| H10   | 3.16 | 2.88  | 2.79  | 2.73  | 2.78  | 2.81  | 2.90  | 2.71  | 2.80  |
| Me-12 | 1.64 | 1.66  | 1.70  | 1.68  | 1.58  | 1.63  | 1.54  | 1.69  | 1.65  |
| Me-13 | 1.11 | 1.33  | 1.23  | 1.22  | 1.09  | 1.29  | 1.23  | 1.13  | 1.26  |
| Me-14 | 1.20 | 1.36  | 1.37  | 1.33  | 1.33  | 1.36  | 1.28  | 1.35  | 1.30  |
| Me-15 | 1.35 | 1.45  | 1.45  | 1.36  | 1.30  | 1.38  | 1.31  | 1.24  | 1.25  |

**Table S3.3.1** – Experimental data of **3a** and calculated isotropic shielding constants of **3a-3h** at the SMD/wB97XD/6-31+G\*\*//MMFF level of theory.

| MM-DP4+  |        |                               |        |        |        |        |        |        |        |
|----------|--------|-------------------------------|--------|--------|--------|--------|--------|--------|--------|
| Compound |        | 3a                            | 3b     | 3c     | 3d     | 3e     | 3f     | 3g     | 3h     |
| Nuclei   | Exp    | Isotropic shielding constants |        |        |        |        |        |        |        |
| C1       | 33.60  | 159.90                        | 159.78 | 160.76 | 159.72 | 159.82 | 160.15 | 159.62 | 159.55 |
| C2       | 58.10  | 129.60                        | 129.70 | 129.02 | 132.43 | 128.44 | 132.16 | 127.98 | 127.04 |
| C3       | 68.00  | 126.11                        | 125.96 | 124.70 | 123.53 | 124.70 | 123.54 | 124.42 | 124.60 |
| C4       | 45.20  | 148.23                        | 148.39 | 148.81 | 148.16 | 148.60 | 147.85 | 147.82 | 147.72 |
| C5       | 74.20  | 123.29                        | 123.61 | 122.25 | 123.78 | 121.47 | 123.56 | 122.58 | 122.02 |
| C6       | 50.40  | 140.96                        | 140.73 | 143.01 | 140.15 | 142.55 | 140.38 | 142.82 | 142.54 |
| C7       | 49.30  | 144.76                        | 143.59 | 142.39 | 142.96 | 143.97 | 144.90 | 142.99 | 144.86 |
| C8       | 112.60 | 71.11                         | 78.94  | 79.25  | 78.89  | 70.56  | 72.27  | 78.23  | 72.11  |
| C9       | 73.80  | 120.74                        | 117.49 | 118.06 | 118.79 | 120.53 | 121.42 | 118.65 | 121.41 |
| C10      | 61.00  | 136.28                        | 137.02 | 136.13 | 137.72 | 135.26 | 137.08 | 135.68 | 134.58 |
| C11      | 61.00  | 135.34                        | 132.81 | 130.83 | 132.08 | 132.30 | 134.54 | 129.91 | 131.60 |
| C12      | 31.00  | 165.61                        | 165.41 | 163.71 | 164.36 | 164.12 | 164.31 | 172.12 | 172.50 |
| C14      | 18.20  | 176.53                        | 178.06 | 178.59 | 177.64 | 177.31 | 176.40 | 177.50 | 176.24 |
| C13      | 24.60  | 171.61                        | 171.48 | 169.88 | 171.37 | 170.32 | 171.55 | 169.82 | 169.94 |
| C15      | 21.50  | 176.17                        | 176.62 | 176.94 | 175.86 | 177.19 | 175.54 | 177.51 | 177.19 |
| H1b      | 2.13   | 29.48                         | 29.48  | 29.32  | 29.60  | 29.22  | 29.54  | 29.22  | 29.16  |
| H1a      | 2.92   | 29.29                         | 29.27  | 29.05  | 29.01  | 29.04  | 28.98  | 29.09  | 29.05  |
| H2       | 4.22   | 27.05                         | 27.03  | 26.70  | 27.33  | 26.73  | 27.32  | 26.55  | 26.60  |
| H4b      | 2.23   | 29.29                         | 29.24  | 29.45  | 29.07  | 29.47  | 29.12  | 29.21  | 29.33  |
| H4a      | 2.45   | 29.15                         | 29.10  | 28.96  | 28.94  | 28.95  | 29.00  | 28.80  | 28.91  |
| H5       | 4.58   | 26.84                         | 26.87  | 26.90  | 27.26  | 26.79  | 27.21  | 27.11  | 27.08  |
| H9       | 4.00   | 27.47                         | 27.53  | 27.64  | 27.53  | 27.38  | 27.59  | 27.69  | 27.61  |
| H10      | 3.16   | 28.66                         | 28.75  | 28.66  | 28.67  | 28.66  | 28.65  | 28.77  | 28.68  |
| Me-12    | 1.64   | 29.91                         | 29.89  | 30.00  | 29.90  | 29.98  | 29.90  | 29.86  | 29.87  |
| Me-13    | 1.11   | 30.54                         | 30.61  | 30.49  | 30.60  | 30.38  | 30.51  | 30.63  | 30.46  |
| Me-14    | 1.20   | 30.35                         | 30.32  | 30.30  | 30.25  | 30.30  | 30.28  | 30.20  | 30.21  |
| Me-15    | 1.35   | 30.21                         | 30.22  | 30.32  | 30.26  | 30.27  | 30.22  | 30.32  | 30.26  |

**Table S3.3.2** – Experimental data of **3a** and scaled chemical shifts of **3a-3h** at the SMD/wB97XD/6-31+G\*\*//MMFF level of theory.

| MM-DP4+  |        |               |        |        |        |        |        |        |        |
|----------|--------|---------------|--------|--------|--------|--------|--------|--------|--------|
| Compound |        | 3a            | 3b     | 3c     | 3d     | 3e     | 3f     | 3g     | 3h     |
| Nuclei   | Exp    | Scaled shifts |        |        |        |        |        |        |        |
| C1       | 33.60  | 35.45         | 35.17  | 33.93  | 34.95  | 35.21  | 34.98  | 35.58  | 35.90  |
| C2       | 58.10  | 63.35         | 63.88  | 64.18  | 61.21  | 63.70  | 61.07  | 65.11  | 65.35  |
| C3       | 68.00  | 66.56         | 67.45  | 68.29  | 69.77  | 67.09  | 69.11  | 68.42  | 67.56  |
| C4       | 45.20  | 46.20         | 46.04  | 45.32  | 46.07  | 45.40  | 46.44  | 46.59  | 46.61  |
| C5       | 74.20  | 69.16         | 69.70  | 70.62  | 69.54  | 70.02  | 69.09  | 70.14  | 69.90  |
| C6       | 50.40  | 52.90         | 53.35  | 50.84  | 53.79  | 50.89  | 53.41  | 51.25  | 51.31  |
| C7       | 49.30  | 49.40         | 50.62  | 51.43  | 51.08  | 49.60  | 49.19  | 51.10  | 49.20  |
| C8       | 112.60 | 117.20        | 112.34 | 111.60 | 112.75 | 116.24 | 116.89 | 111.52 | 115.11 |
| C9       | 73.80  | 71.51         | 75.54  | 74.61  | 74.34  | 70.87  | 71.08  | 73.81  | 70.45  |

|       |       |       |       |       |       |       |       |       |       |
|-------|-------|-------|-------|-------|-------|-------|-------|-------|-------|
| C10   | 61.00 | 57.20 | 56.90 | 57.40 | 56.12 | 57.50 | 56.48 | 57.92 | 58.52 |
| C11   | 61.00 | 58.07 | 60.91 | 62.45 | 61.55 | 60.19 | 58.85 | 63.31 | 61.22 |
| C12   | 31.00 | 30.20 | 29.80 | 31.12 | 30.48 | 31.31 | 31.11 | 23.92 | 24.17 |
| C14   | 18.20 | 20.15 | 17.72 | 16.95 | 17.70 | 19.34 | 19.83 | 18.90 | 20.78 |
| C13   | 24.60 | 24.68 | 23.99 | 25.24 | 23.73 | 25.68 | 24.36 | 26.07 | 26.49 |
| C15   | 21.50 | 20.48 | 19.09 | 18.51 | 19.42 | 19.45 | 20.63 | 18.89 | 19.92 |
| H1b   | 2.13  | 2.14  | 2.14  | 2.26  | 1.99  | 2.32  | 2.04  | 2.33  | 2.36  |
| H1a   | 2.92  | 2.32  | 2.34  | 2.52  | 2.61  | 2.48  | 2.63  | 2.45  | 2.47  |
| H2    | 4.22  | 4.48  | 4.52  | 4.74  | 4.37  | 4.63  | 4.38  | 4.92  | 4.88  |
| H4b   | 2.23  | 2.32  | 2.37  | 2.15  | 2.55  | 2.08  | 2.48  | 2.33  | 2.20  |
| H4a   | 2.45  | 2.46  | 2.51  | 2.61  | 2.68  | 2.56  | 2.61  | 2.73  | 2.61  |
| H5    | 4.58  | 4.68  | 4.68  | 4.54  | 4.44  | 4.57  | 4.50  | 4.38  | 4.40  |
| H9    | 4.00  | 4.07  | 4.03  | 3.85  | 4.16  | 4.02  | 4.09  | 3.81  | 3.88  |
| H10   | 3.16  | 2.93  | 2.85  | 2.88  | 2.96  | 2.83  | 2.98  | 2.77  | 2.83  |
| Me-12 | 1.64  | 1.72  | 1.74  | 1.62  | 1.68  | 1.61  | 1.67  | 1.70  | 1.66  |
| Me-13 | 1.11  | 1.12  | 1.05  | 1.16  | 0.94  | 1.24  | 1.02  | 0.95  | 1.09  |
| Me-14 | 1.20  | 1.30  | 1.33  | 1.34  | 1.31  | 1.31  | 1.26  | 1.37  | 1.33  |
| Me-15 | 1.35  | 1.44  | 1.42  | 1.32  | 1.30  | 1.34  | 1.32  | 1.25  | 1.28  |

**Table S3.3.3** – Experimental data of **3a** and scaled chemical shifts of **3a-3h** at the SMD/wB97XD/6-31+G\*\*//MMFF level of theory, after excluding all the signals adjacent to bromine.

| MM-DP4+  |       |               |       |       |       |       |       |       |       |
|----------|-------|---------------|-------|-------|-------|-------|-------|-------|-------|
| Compound |       | 3a            | 3b    | 3c    | 3d    | 3e    | 3f    | 3g    | 3h    |
| Nuclei   | Exp   | Scaled shifts |       |       |       |       |       |       |       |
| C1       | 33.60 | 35.48         | 34.32 | 35.09 | 35.17 | 34.72 | 36.02 | 36.09 | 35.48 |
| C3       | 68.00 | 68.08         | 68.69 | 70.24 | 69.21 | 71.27 | 68.91 | 69.47 | 68.08 |
| C4       | 45.20 | 46.46         | 45.71 | 46.32 | 46.05 | 47.00 | 47.04 | 47.38 | 46.46 |
| C5       | 74.20 | 70.35         | 71.02 | 70.01 | 72.33 | 71.25 | 70.63 | 71.94 | 70.35 |
| C6       | 50.40 | 53.84         | 51.23 | 54.10 | 51.91 | 54.46 | 51.72 | 52.33 | 53.84 |
| C7       | 49.30 | 51.09         | 51.83 | 51.37 | 50.53 | 49.94 | 51.56 | 50.11 | 51.09 |
| C9       | 73.80 | 76.26         | 75.01 | 74.85 | 73.25 | 73.38 | 74.30 | 72.52 | 76.26 |
| C10      | 61.00 | 57.43         | 57.79 | 56.46 | 58.97 | 57.75 | 58.39 | 59.94 | 57.43 |
| C11      | 61.00 | 61.48         | 62.84 | 61.94 | 61.84 | 60.28 | 63.79 | 62.78 | 61.48 |
| C12      | 31.00 | 30.05         | 31.51 | 30.58 | 31.00 | 30.57 | 24.34 | 23.71 | 30.05 |
| C14      | 18.20 | 17.85         | 17.33 | 17.68 | 18.22 | 18.49 | 19.31 | 20.14 | 17.85 |
| C13      | 24.60 | 24.19         | 25.62 | 23.77 | 24.99 | 23.34 | 26.49 | 26.16 | 24.19 |
| C15      | 21.50 | 19.24         | 18.89 | 19.41 | 18.34 | 19.35 | 19.30 | 19.23 | 19.24 |
| H1b      | 2.13  | 2.16          | 2.30  | 2.00  | 2.35  | 2.05  | 2.39  | 2.42  | 2.16  |
| H1a      | 2.92  | 2.37          | 2.58  | 2.63  | 2.52  | 2.65  | 2.52  | 2.54  | 2.37  |
| H4b      | 2.23  | 2.40          | 2.17  | 2.56  | 2.10  | 2.50  | 2.39  | 2.24  | 2.40  |
| H4a      | 2.45  | 2.54          | 2.67  | 2.70  | 2.61  | 2.63  | 2.83  | 2.69  | 2.54  |
| H5       | 4.58  | 4.80          | 4.76  | 4.49  | 4.74  | 4.56  | 4.66  | 4.66  | 4.80  |
| H9       | 4.00  | 4.13          | 4.00  | 4.21  | 4.15  | 4.14  | 4.03  | 4.09  | 4.13  |
| H10      | 3.16  | 2.89          | 2.97  | 2.98  | 2.90  | 3.00  | 2.87  | 2.94  | 2.89  |
| Me-12    | 1.64  | 1.74          | 1.61  | 1.68  | 1.60  | 1.67  | 1.70  | 1.65  | 1.74  |
| Me-13    | 1.20  | 1.02          | 1.11  | 0.93  | 1.20  | 1.01  | 0.87  | 1.02  | 1.02  |
| Me-14    | 1.11  | 1.31          | 1.30  | 1.30  | 1.28  | 1.25  | 1.32  | 1.29  | 1.31  |
| Me-15    | 1.35  | 1.41          | 1.29  | 1.29  | 1.31  | 1.31  | 1.20  | 1.23  | 1.41  |

**Table S3.3.4** – Experimental data of **3a** and scaled chemical shifts of **3a-3h** at the SMD/wB97XD/6-31+G\*\*//MMFF level of theory, after excluding all the signals adjacent to bromine and chlorine.

| MM-DP4+  |      |               |       |       |       |       |       |       |       |
|----------|------|---------------|-------|-------|-------|-------|-------|-------|-------|
| Compound |      | 3a            | 3b    | 3c    | 3d    | 3e    | 3f    | 3g    | 3h    |
| Nuclei   | Exp  | Scaled shifts |       |       |       |       |       |       |       |
| C1       | 33.6 | 35.35         | 35.48 | 34.34 | 35.15 | 35.20 | 34.81 | 36.05 | 36.14 |
| C4       | 45.2 | 47.04         | 46.47 | 45.77 | 46.52 | 46.15 | 47.30 | 47.13 | 47.52 |
| C5       | 74.2 | 72.02         | 70.37 | 71.17 | 70.49 | 72.61 | 71.99 | 70.83 | 72.27 |
| C6       | 50.4 | 54.33         | 53.85 | 51.31 | 54.40 | 52.05 | 54.90 | 51.82 | 52.51 |
| C7       | 49.3 | 50.52         | 51.10 | 51.91 | 51.63 | 50.67 | 50.30 | 51.66 | 50.27 |
| C9       | 73.8 | 74.58         | 76.28 | 75.18 | 75.40 | 73.53 | 74.16 | 74.52 | 72.85 |
| C10      | 61.0 | 59.01         | 57.44 | 57.89 | 56.78 | 59.16 | 58.25 | 58.53 | 60.18 |
| C11      | 61.0 | 59.95         | 61.49 | 62.96 | 62.33 | 62.05 | 60.83 | 63.95 | 63.04 |
| C12      | 31.0 | 29.64         | 30.05 | 31.51 | 30.59 | 31.01 | 30.58 | 24.31 | 23.66 |
| C14      | 18.2 | 18.70         | 17.85 | 17.28 | 17.53 | 18.14 | 18.30 | 19.26 | 20.06 |
| C13      | 24.6 | 23.63         | 24.19 | 25.61 | 23.70 | 24.96 | 23.23 | 26.48 | 26.13 |
| C15      | 21.5 | 19.06         | 19.23 | 18.85 | 19.29 | 18.26 | 19.17 | 19.25 | 19.15 |

|       |      |      |      |      |      |      |      |      |      |
|-------|------|------|------|------|------|------|------|------|------|
| H1b   | 2.13 | 2.16 | 2.16 | 2.30 | 2.00 | 2.35 | 2.05 | 2.39 | 2.42 |
| H1a   | 2.92 | 2.35 | 2.37 | 2.58 | 2.63 | 2.52 | 2.65 | 2.52 | 2.54 |
| H4b   | 2.23 | 2.34 | 2.40 | 2.17 | 2.56 | 2.10 | 2.50 | 2.39 | 2.24 |
| H4a   | 2.45 | 2.48 | 2.54 | 2.67 | 2.70 | 2.61 | 2.63 | 2.83 | 2.69 |
| H5    | 4.58 | 4.78 | 4.80 | 4.76 | 4.49 | 4.74 | 4.56 | 4.66 | 4.66 |
| H9    | 4.00 | 4.15 | 4.13 | 4.00 | 4.21 | 4.15 | 4.14 | 4.03 | 4.09 |
| H10   | 3.16 | 2.97 | 2.89 | 2.97 | 2.98 | 2.90 | 3.00 | 2.87 | 2.94 |
| Me-12 | 1.64 | 1.72 | 1.74 | 1.61 | 1.68 | 1.60 | 1.67 | 1.70 | 1.65 |
| Me-13 | 1.20 | 1.10 | 1.02 | 1.11 | 0.93 | 1.20 | 1.01 | 0.87 | 1.02 |
| Me-14 | 1.11 | 1.28 | 1.31 | 1.30 | 1.30 | 1.28 | 1.25 | 1.32 | 1.29 |
| Me-15 | 1.35 | 1.43 | 1.41 | 1.29 | 1.29 | 1.31 | 1.31 | 1.20 | 1.23 |

**Table S3.3.5** – Experimental data of **3a** and scaled chemical shifts of **3a-3h** at the SMD/wB97XD/6-31+G\*\*//MMFF level of theory, after excluding all the carbon signals adjacent to bromine and chlorine.

| MM-DP4+  |      |               |       |       |       |       |       |       |       |
|----------|------|---------------|-------|-------|-------|-------|-------|-------|-------|
| Compound |      | 3a            | 3b    | 3c    | 3d    | 3e    | 3f    | 3g    | 3h    |
| Nuclei   | Exp  | Scaled shifts |       |       |       |       |       |       |       |
| C1       | 33.6 | 35.35         | 35.48 | 34.34 | 35.15 | 35.20 | 34.81 | 36.05 | 36.14 |
| C4       | 45.2 | 47.04         | 46.47 | 45.77 | 46.52 | 46.15 | 47.30 | 47.13 | 47.52 |
| C5       | 74.2 | 72.02         | 70.37 | 71.17 | 70.49 | 72.61 | 71.99 | 70.83 | 72.27 |
| C6       | 50.4 | 54.33         | 53.85 | 51.31 | 54.40 | 52.05 | 54.90 | 51.82 | 52.51 |
| C7       | 49.3 | 50.52         | 51.10 | 51.91 | 51.63 | 50.67 | 50.30 | 51.66 | 50.27 |
| C9       | 73.8 | 74.58         | 76.28 | 75.18 | 75.40 | 73.53 | 74.16 | 74.52 | 72.85 |
| C10      | 61.0 | 59.01         | 57.44 | 57.89 | 56.78 | 59.16 | 58.25 | 58.53 | 60.18 |
| C11      | 61.0 | 59.95         | 61.49 | 62.96 | 62.33 | 62.05 | 60.83 | 63.95 | 63.04 |
| C12      | 31.0 | 29.64         | 30.05 | 31.51 | 30.59 | 31.01 | 30.58 | 24.31 | 23.66 |
| C14      | 18.2 | 18.70         | 17.85 | 17.28 | 17.53 | 18.14 | 18.30 | 19.26 | 20.06 |
| C13      | 24.6 | 23.63         | 24.19 | 25.61 | 23.70 | 24.96 | 23.23 | 26.48 | 26.13 |
| C15      | 21.5 | 19.06         | 19.23 | 18.85 | 19.29 | 18.26 | 19.17 | 19.25 | 19.15 |
| H1b      | 2.13 | 2.14          | 2.14  | 2.26  | 1.99  | 2.32  | 2.04  | 2.33  | 2.36  |
| H1a      | 2.92 | 2.32          | 2.34  | 2.52  | 2.61  | 2.48  | 2.63  | 2.45  | 2.47  |
| H2       | 4.22 | 4.48          | 4.52  | 4.74  | 4.37  | 4.63  | 4.38  | 4.92  | 4.88  |
| H4b      | 2.23 | 2.32          | 2.37  | 2.15  | 2.55  | 2.08  | 2.48  | 2.33  | 2.20  |
| H4a      | 2.45 | 2.46          | 2.51  | 2.61  | 2.68  | 2.56  | 2.61  | 2.73  | 2.61  |
| H5       | 4.58 | 4.68          | 4.68  | 4.54  | 4.44  | 4.57  | 4.50  | 4.38  | 4.40  |
| H9       | 4.00 | 4.07          | 4.03  | 3.85  | 4.16  | 4.02  | 4.09  | 3.81  | 3.88  |
| H10      | 3.16 | 2.93          | 2.85  | 2.88  | 2.96  | 2.83  | 2.98  | 2.77  | 2.83  |
| Me-12    | 1.64 | 1.72          | 1.74  | 1.62  | 1.68  | 1.61  | 1.67  | 1.70  | 1.66  |
| Me-13    | 1.11 | 1.12          | 1.05  | 1.16  | 0.94  | 1.24  | 1.02  | 0.95  | 1.09  |
| Me-14    | 1.20 | 1.30          | 1.33  | 1.34  | 1.31  | 1.31  | 1.26  | 1.37  | 1.33  |
| Me-15    | 1.35 | 1.44          | 1.42  | 1.32  | 1.30  | 1.34  | 1.32  | 1.25  | 1.28  |

**Table S3.4.1** – Experimental data of **3a** and calculated isotropic shielding constants of **3a-3h** at the PCM/mPW1PW91/6-311+G\*\*// B3LYP/6-31G\* level of theory.

| DP4+     |       |                               |        |        |        |        |        |        |        |
|----------|-------|-------------------------------|--------|--------|--------|--------|--------|--------|--------|
| Compound |       | 3a                            | 3b     | 3c     | 3d     | 3e     | 3f     | 3g     | 3h     |
| Nuclei   | Exp   | Isotropic shielding constants |        |        |        |        |        |        |        |
| C1       | 33.6  | 149.76                        | 149.83 | 149.42 | 151.24 | 149.87 | 151.14 | 149.21 | 149.13 |
| C2       | 58.1  | 109.82                        | 110.02 | 109.58 | 114.68 | 109.58 | 114.76 | 107.52 | 107.84 |
| C3       | 68.0  | 103.03                        | 102.78 | 102.46 | 101.92 | 102.27 | 101.89 | 102.67 | 102.72 |
| C4       | 45.2  | 138.15                        | 138.24 | 138.49 | 138.40 | 138.72 | 138.36 | 137.69 | 137.41 |
| C5       | 74.2  | 108.75                        | 108.90 | 106.93 | 109.01 | 106.64 | 108.88 | 106.65 | 106.24 |
| C6       | 50.4  | 130.77                        | 131.18 | 131.70 | 130.12 | 131.83 | 130.32 | 132.09 | 131.69 |
| C7       | 49.3  | 132.15                        | 130.51 | 129.68 | 130.31 | 131.64 | 131.04 | 130.11 | 131.02 |
| C8       | 112.6 | 50.08                         | 59.23  | 58.13  | 59.18  | 49.16  | 50.17  | 59.47  | 50.02  |
| C9       | 73.8  | 108.70                        | 109.54 | 109.48 | 109.68 | 108.54 | 108.54 | 110.14 | 108.86 |
| C10      | 61.0  | 122.79                        | 123.61 | 120.72 | 123.15 | 120.20 | 122.28 | 120.63 | 119.92 |
| C11      | 61.0  | 122.51                        | 119.49 | 117.72 | 119.17 | 120.16 | 121.91 | 118.48 | 120.87 |
| C12      | 31.0  | 155.88                        | 155.98 | 153.80 | 155.24 | 153.83 | 155.23 | 162.40 | 162.28 |
| C13      | 24.6  | 167.76                        | 168.81 | 169.58 | 169.70 | 168.40 | 168.20 | 170.45 | 168.97 |
| C14      | 18.2  | 162.63                        | 162.56 | 160.23 | 162.05 | 160.21 | 162.26 | 159.98 | 160.71 |
| C15      | 21.5  | 164.58                        | 164.65 | 165.31 | 164.81 | 165.08 | 164.85 | 165.05 | 164.92 |
| H1a      | 2.92  | 29.70                         | 29.74  | 29.59  | 29.83  | 29.57  | 29.78  | 29.57  | 29.44  |
| H1b      | 2.13  | 29.61                         | 29.59  | 29.12  | 29.15  | 29.14  | 29.14  | 29.46  | 29.38  |
| H2       | 4.22  | 27.24                         | 27.26  | 27.19  | 27.81  | 27.35  | 27.81  | 27.00  | 27.02  |
| H4a      | 2.45  | 29.39                         | 29.34  | 29.77  | 29.20  | 29.72  | 29.22  | 29.35  | 29.38  |
| H4b      | 2.23  | 29.21                         | 29.19  | 29.04  | 29.04  | 28.99  | 29.10  | 28.95  | 28.98  |



**Table S4.2.1 – DP4 results calculated for example 1a at the B3LYP/6-31G\*\*//MMFF level of theory**

|                  | 1a    | 1b   | 1c   | 1d   | 1e   | 1f   | 1g   | 1h   | 1i   | 1j   | 1k   | 1l   | 1m    | 1n   | 1o   | 1p    |
|------------------|-------|------|------|------|------|------|------|------|------|------|------|------|-------|------|------|-------|
| sDP4+ (H data)   | 91.61 | 0.23 | 0.00 | 0.01 | 0.64 | 0.02 | 0.03 | 0.00 | 0.01 | 0.12 | 0.00 | 0.00 | 0.00  | 1.08 | 5.28 | 0.97  |
| sDP4+ (C data)   | 10.19 | 0.10 | 0.00 | 0.02 | 0.12 | 0.00 | 0.02 | 0.11 | 0.01 | 4.53 | 0.00 | 0.00 | 10.31 | 0.71 | 0.26 | 73.64 |
| sDP4+ (all data) | 92.66 | 0.00 | 0.00 | 0.00 | 0.01 | 0.00 | 0.00 | 0.00 | 0.00 | 0.05 | 0.00 | 0.00 | 0.00  | 0.08 | 0.14 | 7.06  |

**Table S4.3.1 – MM-DP4+ results calculated for example 1a at the SMD/wB97XD/6-31+G\*\*//MMFF level of theory**

|                  | 1a    | 1b   | 1c   | 1d   | 1e    | 1f   | 1g   | 1h   | 1i   | 1j    | 1k   | 1l   | 1m   | 1n    | 1o    | 1p   |
|------------------|-------|------|------|------|-------|------|------|------|------|-------|------|------|------|-------|-------|------|
| sDP4+ (H data)   | 39.85 | 0.25 | 0.00 | 0.00 | 13.62 | 0.06 | 0.13 | 0.05 | 0.67 | 0.14  | 0.00 | 0.06 | 0.00 | 18.36 | 26.80 | 0.00 |
| sDP4+ (C data)   | 82.70 | 1.32 | 0.00 | 0.47 | 1.04  | 0.10 | 0.07 | 0.24 | 0.02 | 8.32  | 0.05 | 0.00 | 0.00 | 4.14  | 1.43  | 0.11 |
| sDP4+ (all data) | 96.21 | 0.01 | 0.00 | 0.00 | 0.41  | 0.00 | 0.00 | 0.00 | 0.00 | 0.04  | 0.00 | 0.00 | 0.00 | 2.22  | 1.12  | 0.00 |
| uDP4+ (H data)   | 48.41 | 0.16 | 0.00 | 0.00 | 12.21 | 0.03 | 1.44 | 0.03 | 0.59 | 0.06  | 0.00 | 0.00 | 0.00 | 14.07 | 22.98 | 0.01 |
| uDP4+ (C data)   | 87.11 | 0.34 | 0.01 | 0.68 | 0.79  | 0.03 | 0.01 | 0.09 | 0.00 | 10.03 | 0.04 | 0.00 | 0.00 | 0.57  | 0.23  | 0.07 |
| uDP4+ (all data) | 99.44 | 0.00 | 0.00 | 0.00 | 0.23  | 0.00 | 0.00 | 0.00 | 0.00 | 0.02  | 0.00 | 0.00 | 0.00 | 0.19  | 0.12  | 0.00 |
| DP4+ (H data)    | 64.95 | 0.00 | 0.00 | 0.00 | 5.60  | 0.00 | 0.01 | 0.00 | 0.01 | 0.00  | 0.00 | 0.00 | 0.00 | 8.69  | 20.73 | 0.00 |
| DP4+ (C data)    | 98.80 | 0.01 | 0.00 | 0.00 | 0.01  | 0.00 | 0.00 | 0.00 | 0.00 | 1.14  | 0.00 | 0.00 | 0.00 | 0.03  | 0.00  | 0.00 |
| DP4+ (all data)  | 99.99 | 0.00 | 0.00 | 0.00 | 0.00  | 0.00 | 0.00 | 0.00 | 0.00 | 0.00  | 0.00 | 0.00 | 0.00 | 0.00  | 0.00  | 0.00 |

**Table S4.4.1 – DP4+ results calculated for example 1a at the PCM/mPW1PW91/6-311+G\*\*//B3LYP/6-31G\* level of theory**

|                  | 1a    | 1b   | 1c   | 1d   | 1e   | 1f   | 1g   | 1h   | 1i   | 1j    | 1k   | 1l   | 1m   | 1n   | 1o    | 1p   |
|------------------|-------|------|------|------|------|------|------|------|------|-------|------|------|------|------|-------|------|
| sDP4+ (H data)   | 13.78 | 0.01 | 0.00 | 0.00 | 5.78 | 0.05 | 0.00 | 0.01 | 0.01 | 0.00  | 0.01 | 0.00 | 0.00 | 1.09 | 79.26 | 0.00 |
| sDP4+ (C data)   | 60.92 | 0.72 | 0.01 | 0.06 | 0.14 | 0.01 | 0.01 | 1.09 | 0.01 | 35.42 | 0.01 | 0.00 | 0.01 | 1.28 | 0.24  | 0.07 |
| sDP4+ (all data) | 97.53 | 0.00 | 0.00 | 0.00 | 0.09 | 0.00 | 0.00 | 0.00 | 0.00 | 0.02  | 0.00 | 0.00 | 0.00 | 0.16 | 2.19  | 0.00 |
| uDP4+ (H data)   | 2.02  | 0.00 | 0.00 | 0.00 | 0.95 | 0.00 | 0.09 | 0.00 | 0.00 | 0.00  | 0.00 | 0.00 | 0.00 | 0.69 | 96.25 | 0.00 |
| uDP4+ (C data)   | 86.20 | 0.00 | 0.00 | 0.00 | 3.61 | 0.00 | 0.01 | 0.07 | 0.02 | 9.74  | 0.01 | 0.00 | 0.00 | 0.05 | 0.29  | 0.01 |
| uDP4+ (all data) | 84.78 | 0.00 | 0.00 | 0.00 | 1.67 | 0.00 | 0.00 | 0.00 | 0.00 | 0.00  | 0.00 | 0.00 | 0.00 | 0.02 | 13.53 | 0.00 |
| DP4+ (H data)    | 0.36  | 0.00 | 0.00 | 0.00 | 0.07 | 0.00 | 0.00 | 0.00 | 0.00 | 0.00  | 0.00 | 0.00 | 0.00 | 0.01 | 99.56 | 0.00 |
| DP4+ (C data)    | 93.82 | 0.00 | 0.00 | 0.00 | 0.01 | 0.00 | 0.00 | 0.00 | 0.00 | 6.17  | 0.00 | 0.00 | 0.00 | 0.00 | 0.00  | 0.00 |
| DP4+ (all data)  | 99.64 | 0.00 | 0.00 | 0.00 | 0.00 | 0.00 | 0.00 | 0.00 | 0.00 | 0.00  | 0.00 | 0.00 | 0.00 | 0.00 | 0.36  | 0.00 |

**Table S4.1.2 – DP4+ results calculated for example 2a at the PCM/mPW1PW91/6-31+G\*\*//B3LYP/6-31G\* level of theory**

|                | 2a    | 2b   | 2c   | 2d   | 2e   | 2f   | 2g   | 2h   |
|----------------|-------|------|------|------|------|------|------|------|
| sDP4+ (H data) | 98.87 | 0.32 | 0.15 | 0.01 | 0.50 | 0.00 | 0.05 | 0.11 |

|                         |       |      |        |      |       |      |      |      |
|-------------------------|-------|------|--------|------|-------|------|------|------|
| <i>sDP4+ (C data)</i>   | 0.02  | 0.00 | 99.98  | 0.00 | 0.00  | 0.00 | 0.00 | 0.00 |
| <i>sDP4+ (all data)</i> | 10.56 | 0.00 | 89.44  | 0.00 | 0.00  | 0.00 | 0.00 | 0.00 |
| <i>uDP4+ (H data)</i>   | 54.60 | 0.59 | 22.68  | 1.01 | 17.91 | 0.02 | 3.15 | 0.05 |
| <i>uDP4+ (C data)</i>   | 1.22  | 0.10 | 98.48  | 0.03 | 0.16  | 0.00 | 0.00 | 0.01 |
| <i>uDP4+ (all data)</i> | 2.90  | 0.00 | 96.97  | 0.00 | 0.12  | 0.00 | 0.00 | 0.00 |
| <i>DP4+ (H data)</i>    | 99.77 | 0.00 | 0.06   | 0.00 | 0.16  | 0.00 | 0.00 | 0.00 |
| <i>DP4+ (C data)</i>    | 0.00  | 0.00 | 100.00 | 0.00 | 0.00  | 0.00 | 0.00 | 0.00 |
| <i>DP4+ (all data)</i>  | 0.35  | 0.00 | 99.65  | 0.00 | 0.00  | 0.00 | 0.00 | 0.00 |

**Table S4.2.2** – DP4 results calculated for example **2a** at the B3LYP/6-31G\*\*//MMFF level of theory

|                         | <b>2a</b> | <b>2b</b> | <b>2c</b> | <b>2d</b> | <b>2e</b> | <b>2f</b> | <b>2g</b> | <b>2h</b> |
|-------------------------|-----------|-----------|-----------|-----------|-----------|-----------|-----------|-----------|
| <i>sDP4+ (H data)</i>   | 94.88     | 2.54      | 0.00      | 0.83      | 0.97      | 0.00      | 0.50      | 0.29      |
| <i>sDP4+ (C data)</i>   | 98.76     | 0.00      | 0.00      | 1.24      | 0.00      | 0.00      | 0.00      | 0.00      |
| <i>sDP4+ (all data)</i> | 99.99     | 0.00      | 0.00      | 0.01      | 0.00      | 0.00      | 0.00      | 0.00      |

**Table S4.3.2** – MM-DP4+ results calculated for example **2a** at the SMD/wB97XD/6-31+G\*\*//MMFF level of theory

|                         | <b>2a</b> | <b>2b</b> | <b>2c</b> | <b>2d</b> | <b>2e</b> | <b>2f</b> | <b>2g</b> | <b>2h</b> |
|-------------------------|-----------|-----------|-----------|-----------|-----------|-----------|-----------|-----------|
| <i>sDP4+ (H data)</i>   | 89.50     | 1.81      | 8.64      | 0.00      | 0.03      | 0.01      | 0.00      | 0.01      |
| <i>sDP4+ (C data)</i>   | 99.55     | 0.01      | 0.43      | 0.00      | 0.01      | 0.00      | 0.00      | 0.00      |
| <i>sDP4+ (all data)</i> | 99.96     | 0.00      | 0.04      | 0.00      | 0.00      | 0.00      | 0.00      | 0.00      |
| <i>uDP4+ (H data)</i>   | 33.89     | 1.24      | 64.23     | 0.03      | 0.25      | 0.08      | 0.21      | 0.06      |
| <i>uDP4+ (C data)</i>   | 97.08     | 0.06      | 2.42      | 0.08      | 0.31      | 0.04      | 0.00      | 0.00      |
| <i>uDP4+ (all data)</i> | 95.48     | 0.00      | 4.51      | 0.00      | 0.00      | 0.00      | 0.00      | 0.00      |
| <i>DP4+ (H data)</i>    | 84.49     | 0.06      | 15.45     | 0.00      | 0.00      | 0.00      | 0.00      | 0.00      |
| <i>DP4+ (C data)</i>    | 99.99     | 0.00      | 0.01      | 0.00      | 0.00      | 0.00      | 0.00      | 0.00      |
| <i>DP4+ (all data)</i>  | 100.0     | 0.00      | 0.00      | 0.00      | 0.00      | 0.00      | 0.00      | 0.00      |

**Table S4.4.2** – DP4+ results calculated for example **2a** at the PCM/mPW1PW91/6-311+G\*\*//B3LYP/6-31G\* level of theory

|                         | <b>2a</b> | <b>2b</b> | <b>2c</b> | <b>2d</b> | <b>2e</b> | <b>2f</b> | <b>2g</b> | <b>2h</b> |
|-------------------------|-----------|-----------|-----------|-----------|-----------|-----------|-----------|-----------|
| <i>sDP4+ (H data)</i>   | 99.16     | 0.77      | 0.00      | 0.00      | 0.06      | 0.00      | 0.01      | 0.00      |
| <i>sDP4+ (C data)</i>   | 6.57      | 0.00      | 91.95     | 1.02      | 0.01      | 0.45      | 0.00      | 0.00      |
| <i>sDP4+ (all data)</i> | 100.0     | 0.00      | 0.00      | 0.00      | 0.00      | 0.00      | 0.00      | 0.00      |
| <i>uDP4+ (H data)</i>   | 82.64     | 8.53      | 0.23      | 0.05      | 8.23      | 0.00      | 0.30      | 0.01      |
| <i>uDP4+ (C data)</i>   | 0.78      | 0.17      | 97.48     | 0.04      | 0.01      | 1.52      | 0.00      | 0.00      |



**Table S4.4.3** – DP4+ results calculated for example **2b** at the PCM/mPW1PW91/6-311+G\*\*//B3LYP/6-31G\* level of theory

|                  | 2a   | 2b    | 2c   | 2d   | 2e   | 2f    | 2g   | 2h   |
|------------------|------|-------|------|------|------|-------|------|------|
| sDP4+ (H data)   | 0.25 | 99.70 | 0.00 | 0.00 | 0.01 | 0.03  | 0.00 | 0.01 |
| sDP4+ (C data)   | 0.00 | 0.00  | 0.00 | 0.00 | 0.00 | 100.0 | 0.00 | 0.00 |
| sDP4+ (all data) | 0.00 | 11.13 | 0.00 | 0.00 | 0.00 | 88.87 | 0.00 | 0.00 |
| uDP4+ (H data)   | 6.45 | 91.12 | 0.00 | 0.00 | 2.27 | 0.11  | 0.04 | 0.01 |
| uDP4+ (C data)   | 0.10 | 0.02  | 8.64 | 0.00 | 0.00 | 91.23 | 0.00 | 0.00 |
| uDP4+ (all data) | 4.98 | 16.88 | 0.23 | 0.00 | 0.02 | 77.89 | 0.00 | 0.00 |
| DP4+ (H data)    | 0.02 | 99.98 | 0.00 | 0.00 | 0.00 | 0.00  | 0.00 | 0.00 |
| DP4+ (C data)    | 0.00 | 0.00  | 0.00 | 0.00 | 0.00 | 100.0 | 0.00 | 0.00 |
| DP4+ (all data)  | 0.00 | 2.64  | 0.00 | 0.00 | 0.00 | 97.36 | 0.00 | 0.00 |

**Table S4.1.4** – DP4+ results calculated for example **3a** at the PCM/mPW1PW91/6-31+G\*\*//B3LYP/6-31G\* level of theory

|                  | 3a    | 3b    | 3c   | 3d    | 3e    | 3f    | 3g   | 3h   |
|------------------|-------|-------|------|-------|-------|-------|------|------|
| sDP4+ (H data)   | 29.2  | 12.29 | 5.96 | 0.9   | 16.82 | 34.51 | 0    | 0.32 |
| sDP4+ (C data)   | 0.12  | 18.35 | 2.75 | 76.84 | 1.31  | 0.58  | 0.04 | 0    |
| sDP4+ (all data) | 1.01  | 63.25 | 4.6  | 19.34 | 6.16  | 5.64  | 0    | 0    |
| uDP4+ (H data)   | 5.51  | 44.32 | 22.9 | 1.79  | 9.99  | 14.69 | 0.01 | 0.79 |
| uDP4+ (C data)   | 4.37  | 9.3   | 1.29 | 18.99 | 0.12  | 65.93 | 0    | 0    |
| uDP4+ (all data) | 1.64  | 28.05 | 2    | 2.31  | 0.08  | 65.92 | 0    | 0    |
| DP4+ (H data)    | 10.59 | 35.86 | 8.99 | 0.11  | 11.06 | 33.37 | 0    | 0.02 |
| DP4+ (C data)    | 0.03  | 10.2  | 0.21 | 87.25 | 0.01  | 2.3   | 0    | 0    |
| DP4+ (all data)  | 0.08  | 80.57 | 0.42 | 2.03  | 0.02  | 16.88 | 0    | 0    |

**Table S4.2.4** – DP4 results calculated for example **3a** at the B3LYP/6-31G\*\*//MMFF level of theory

|                  | 3a   | 3b   | 3c    | 3d    | 3e   | 3f    | 3g   | 3h   |
|------------------|------|------|-------|-------|------|-------|------|------|
| sDP4+ (H data)   | 0.37 | 0.24 | 6.19  | 9.47  | 9.64 | 73.38 | 0.10 | 0.63 |
| sDP4+ (C data)   | 0.00 | 7.23 | 59.07 | 32.80 | 0.06 | 0.02  | 0.80 | 0.00 |
| sDP4+ (all data) | 0.00 | 0.25 | 53.75 | 45.66 | 0.09 | 0.23  | 0.01 | 0.00 |

**Table S4.3.4** – MM-DP4+ results calculated for example **3a** at the SMD/wB97XD/6-31+G\*\*//MMFF level of theory

|                | 1a    | 1b   | 1c    | 1d    | 1e   | 1f    | 1g   | 1h   |
|----------------|-------|------|-------|-------|------|-------|------|------|
| sDP4+ (H data) | 22.69 | 2.24 | 0.79  | 0.58  | 1.12 | 72.57 | 0.00 | 0.02 |
| sDP4+ (C data) | 0.25  | 8.67 | 60.71 | 21.42 | 7.22 | 1.56  | 0.13 | 0.03 |



|                         |       |      |       |       |       |       |      |      |
|-------------------------|-------|------|-------|-------|-------|-------|------|------|
| <i>sDP4+</i> (all data) | 2.73  | 9.42 | 23.16 | 5.97  | 3.91  | 54.83 | 0.00 | 0.00 |
| <i>uDP4+</i> (H data)   | 4.02  | 0.66 | 1.47  | 3.03  | 0.01  | 90.77 | 0.00 | 0.03 |
| <i>uDP4+</i> (C data)   | 14.88 | 7.53 | 16.40 | 7.24  | 23.93 | 29.73 | 0.06 | 0.22 |
| <i>uDP4+</i> (all data) | 2.13  | 0.18 | 0.86  | 0.78  | 0.01  | 96.04 | 0.00 | 0.00 |
| <i>DP4+</i> (H data)    | 1.37  | 0.02 | 0.02  | 0.03  | 0.00  | 98.57 | 0.00 | 0.00 |
| <i>DP4+</i> (C data)    | 0.26  | 4.54 | 69.20 | 10.78 | 12.01 | 3.22  | 0.00 | 0.00 |
| <i>DP4+</i> (all data)  | 0.11  | 0.03 | 0.37  | 0.09  | 0.00  | 99.40 | 0.00 | 0.00 |

**Table S4.4.4** – DP4+ results calculated for example **3a** at the PCM/mPW1PW91/6-311+G\*\*//B3LYP/6-31G\* level of theory

|                         | <b>3a</b> | <b>3b</b> | <b>3c</b> | <b>3d</b> | <b>3e</b> | <b>3f</b> | <b>3g</b> | <b>3h</b> |
|-------------------------|-----------|-----------|-----------|-----------|-----------|-----------|-----------|-----------|
| <i>sDP4+</i> (H data)   | 20.40     | 1.73      | 0.67      | 0.09      | 74.59     | 2.42      | 0.00      | 0.11      |
| <i>sDP4+</i> (C data)   | 0.03      | 3.44      | 20.52     | 73.35     | 0.99      | 1.63      | 0.04      | 0.01      |
| <i>sDP4+</i> (all data) | 0.49      | 5.68      | 13.09     | 6.39      | 70.57     | 3.78      | 0.00      | 0.00      |
| <i>uDP4+</i> (H data)   | 11.60     | 8.52      | 5.77      | 0.10      | 70.07     | 3.73      | 0.01      | 0.20      |
| <i>uDP4+</i> (C data)   | 2.68      | 15.07     | 0.36      | 74.13     | 0.15      | 7.61      | 0.00      | 0.00      |
| <i>uDP4+</i> (all data) | 14.93     | 61.73     | 1.01      | 3.67      | 5.00      | 13.66     | 0.00      | 0.00      |
| <i>DP4+</i> (H data)    | 4.31      | 0.27      | 0.07      | 0.00      | 95.19     | 0.16      | 0.00      | 0.00      |
| <i>DP4+</i> (C data)    | 0.00      | 0.94      | 0.14      | 98.70     | 0.00      | 0.23      | 0.00      | 0.00      |
| <i>DP4+</i> (all data)  | 0.92      | 43.90     | 1.65      | 2.94      | 44.13     | 6.46      | 0.00      | 0.00      |

**Table S4.5-** MAE and MaxErr obtained for <sup>1</sup>H and <sup>13</sup>C by using the three DP4 methods under analysis.

|           | <b>DP4</b>                      | <b>MM-DP4+</b> | <b>DP4+</b> | <b>DP4</b>                    | <b>MM-DP4+</b> | <b>DP4+</b> |
|-----------|---------------------------------|----------------|-------------|-------------------------------|----------------|-------------|
|           | Unscaled <sup>13</sup> C MAE    |                |             | Scaled <sup>13</sup> C MAE    |                |             |
| <b>1</b>  | 4.1                             | 5.0            | 4.8         | 3.2                           | 2.6            | 4.3         |
| <b>2a</b> | 3.5                             | 4.3            | 5.6         | 2.5                           | 2.0            | 4.1         |
| <b>2b</b> | 3.6                             | 4.4            | 5.7         | 2.6                           | 1.9            | 4.1         |
| <b>3</b>  | 4.3                             | 4.9            | 5.7         | 2.9                           | 2.3            | 2.7         |
|           | Unscaled <sup>13</sup> C MaxErr |                |             | Scaled <sup>13</sup> C MaxErr |                |             |
| <b>1</b>  | 11.1                            | 11.2           | 17.2        | 7.2                           | 6.0            | 12.1        |
| <b>2a</b> | 10.4                            | 10.8           | 16.6        | 7.4                           | 6.6            | 11.0        |
| <b>2b</b> | 10.4                            | 11.0           | 16.6        | 7.3                           | 6.7            | 11.0        |
| <b>3</b>  | 18.7                            | 15.1           | 20.4        | 7.0                           | 5.3            | 8.8         |
|           | Unscaled <sup>1</sup> H MAE     |                |             | Scaled <sup>1</sup> H MAE     |                |             |
| <b>1</b>  | 0.13                            | 0.17           | 0.14        | 0.06                          | 0.11           | 0.10        |
| <b>2a</b> | 0.15                            | 0.12           | 0.12        | 0.11                          | 0.10           | 0.06        |
| <b>2b</b> | 0.14                            | 0.14           | 0.12        | 0.11                          | 0.12           | 0.08        |
| <b>3</b>  | 0.21                            | 0.20           | 0.17        | 0.19                          | 0.14           | 0.15        |
|           | Unscaled <sup>1</sup> H MaxErr  |                |             | Scaled <sup>1</sup> H MaxErr  |                |             |
| <b>1</b>  | 0.46                            | 0.66           | 0.50        | 0.14                          | 0.31           | 0.28        |
| <b>2a</b> | 0.28                            | 0.40           | 0.36        | 0.39                          | 0.17           | 0.19        |

|           |      |      |      |      |      |      |
|-----------|------|------|------|------|------|------|
| <b>2b</b> | 0.28 | 0.48 | 0.41 | 0.37 | 0.22 | 0.22 |
| <b>3</b>  | 0.71 | 0.51 | 0.81 | 0.72 | 0.60 | 0.81 |

## 5. Study of the dependence of magnetic isotropic shielding constants calculation and calculated bond distance

**Table 5.1** - Carbon-Halogen bond distances (Å) and associated  $^{13}\text{C}$  unscaled errors (UE\_C) with B3LYP/6-31G\* optimized geometries (OPTB) and Molecular Mechanics (MMFF) Optimized Geometries. NMR calculations at PCM/mPW1PW91/6-31+G\*\* level of theory

|           | Nuclei        | OPTB  |          | MMFF  |          |
|-----------|---------------|-------|----------|-------|----------|
|           |               | UE_C  | C-X dist | UE_C  | C-X dist |
| <b>1</b>  | <b>C2-Br</b>  | 15.93 | 2.00     | 11.25 | 1.96     |
|           | <b>C3-Cl</b>  | 11.59 | 1.85     | 4.19  | 1.81     |
|           | <b>C10-Br</b> | 17.20 | 2.02     | 9.23  | 1.98     |
| <b>2a</b> | <b>C1-Cl</b>  | 8.95  | 1.85     | 1.20  | 1.79     |
|           | <b>C3-Br</b>  | 16.59 | 2.00     | 10.83 | 1.97     |
|           | <b>C5-Cl</b>  | 9.17  | 1.85     | 4.11  | 1.80     |
|           | <b>C8-Cl</b>  | 8.46  | 1.84     | 2.56  | 1.77     |
| <b>2b</b> | <b>C1-Cl</b>  | 8.70  | 1.85     | 2.02  | 1.79     |
|           | <b>C3-Br</b>  | 16.61 | 2.00     | 11.04 | 1.97     |
|           | <b>C5-Cl</b>  | 9.50  | 1.85     | 3.70  | 1.80     |
|           | <b>C8-Cl</b>  | 8.62  | 1.83     | 2.96  | 1.77     |
| <b>3</b>  | <b>C2-Br</b>  | 17.05 | 1.99     | 11.01 | 1.96     |
|           | <b>C3-Cl</b>  | 12.45 | 1.85     | 4.85  | 1.81     |
|           | <b>C8-Br</b>  | 20.40 | 2.01     | 7.27  | 1.97     |

**Table S5.2** – Impact of solvation on the C-Halogen bond distance for geometries optimized at the B3LYP/6-31G\* theory level. Carbon-Halogen bond distances (Å) and associated  $^{13}\text{C}$  unscaled errors (UE\_C) with B3LYP/6-31G\* optimized geometries in vacuum (OPTB) and PCM/B3LYP/6-31G\* Optimized Geometries (OPTB/PCM). NMR calculations at PCM/mPW1PW91/6-31+G\*\* level of theory

|           | Nuclei        | OPTB  |          | OPTB/PCM |          |
|-----------|---------------|-------|----------|----------|----------|
|           |               | UE_C  | C-X dist | UE_C     | C-X dist |
| <b>1</b>  | <b>C2-Br</b>  | 15.93 | 2.00     | 16.69    | 2.00     |
|           | <b>C3-Cl</b>  | 11.59 | 1.85     | 13.04    | 1.86     |
|           | <b>C10-Br</b> | 17.20 | 2.02     | 17.45    | 2.02     |
| <b>2a</b> | <b>C1-Cl</b>  | 8.95  | 1.85     | 9.06     | 1.86     |
|           | <b>C3-Br</b>  | 16.59 | 2.00     | 17.00    | 2.00     |
|           | <b>C5-Cl</b>  | 9.17  | 1.85     | 10.15    | 1.86     |
|           | <b>C8-Cl</b>  | 8.46  | 1.84     | 10.20    | 1.84     |
| <b>2b</b> | <b>C1-Cl</b>  | 8.70  | 1.85     | 9.02     | 1.86     |
|           | <b>C3-Br</b>  | 16.61 | 2.00     | 16.80    | 2.00     |
|           | <b>C5-Cl</b>  | 9.50  | 1.85     | 9.80     | 1.86     |
|           | <b>C8-Cl</b>  | 8.62  | 1.83     | 10.74    | 1.84     |

|          |              |       |      |       |      |
|----------|--------------|-------|------|-------|------|
| <b>3</b> | <b>C2-Br</b> | 17.05 | 1.99 | 17.28 | 2.00 |
|          | <b>C3-Cl</b> | 12.45 | 1.85 | 13.91 | 1.87 |
|          | <b>C8-Br</b> | 20.40 | 2.01 | 20.61 | 2.02 |
| <b>4</b> | <b>C-Br</b>  | 17.57 | 2.00 | 19.12 | 2.01 |
| <b>5</b> | <b>C-Cl</b>  | 10.28 | 1.84 | 11.96 | 1.85 |

**Table S5.3** –  $^{13}\text{C}$  and  $^1\text{H}$  unscaled errors (UE) for nuclei adjacent to Br and Cl, with associated Carbon-Halogen bond distances for each geometry. A: NMR Calculations with PCM/mPW1PW91/6-31+G\*\* level. B: NMR Calculations with B3LYP/6-31G\* level.

|                                    | <i>UE <math>\alpha</math> Br <math>^{13}\text{C}</math></i> | <i>UE <math>\alpha</math> Br <math>^1\text{H}</math></i> | <i>Dist C-Br Calc</i> | <i>UE <math>\alpha</math> Cl <math>^{13}\text{C}</math></i> | <i>UE <math>\alpha</math> Cl <math>^1\text{H}</math></i> | <i>Dist C-Cl Calc</i> |
|------------------------------------|-------------------------------------------------------------|----------------------------------------------------------|-----------------------|-------------------------------------------------------------|----------------------------------------------------------|-----------------------|
| <b>B//MMFF</b>                     | 5.60                                                        | -0.229                                                   | 1.9463                | 0.07                                                        | -0.344                                                   | 1.7827                |
| <b>A//MMFF</b>                     | 7.12                                                        | 0.008                                                    | 1.9463                | 0.70                                                        | -0.222                                                   | 1.7827                |
| <b>B//UFF</b>                      | 5.89                                                        | -0.428                                                   | 1.9475                | -0.261                                                      | -0.4802                                                  | 1.7897                |
| <b>A//UFF</b>                      | 7.16                                                        | -0.186                                                   | 1.9475                | 0.3693                                                      | -0.3533                                                  | 1.7897                |
| <b>B//RHF_Am1</b>                  | 5.33                                                        | -0.315                                                   | 1.9373                | -2.7066                                                     | -0.4645                                                  | 1.7611                |
| <b>A//RHF_Am1</b>                  | 6.35                                                        | -0.119                                                   | 1.9373                | -2.4906                                                     | -0.379                                                   | 1.7611                |
| <b>B//RHF_321G</b>                 | 15.47                                                       | -0.075                                                   | 2.0023                | 19.293                                                      | 0.2685                                                   | 1.9081                |
| <b>A//RHF_321G</b>                 | 18.05                                                       | 0.178                                                    | 2.0023                | 22.2025                                                     | 0.4445                                                   | 1.9081                |
| <b>B// B3LYP/6-31G*</b>            | 14.86                                                       | 0.049                                                    | 2.0021                | 8.74                                                        | -0.116                                                   | 1.8378                |
| <b>A// B3LYP/6-31G*</b>            | 17.57                                                       | 0.301                                                    | 2.0021                | 10.28                                                       | 0.010                                                    | 1.8378                |
| <b>B// B3LYP/6-311++G**</b>        | 15.73                                                       | 0.119                                                    | 2.0075                | 9.1556                                                      | -0.071                                                   | 1.8393                |
| <b>A// B3LYP/6-311++G**</b>        | 18.41                                                       | 0.362                                                    | 2.0075                | 10.5875                                                     | 0.0493                                                   | 1.8393                |
| <b>B// B3LYP/6-311++G(3df,2pd)</b> | 14.73                                                       | 0.101                                                    | 1.9989                | 7.3018                                                      | -0.1269                                                  | 1.8246                |
| <b>A// B3LYP/6-311++G(3df,2pd)</b> | 17.26                                                       | 0.338                                                    | 1.9989                | 8.4974                                                      | -0.0148                                                  | 1.8246                |
| <b>B// B3LYP/cc-PVTZ</b>           | 14.63                                                       | 0.082                                                    | 1.9996                | 8.1386                                                      | -0.105                                                   | 1.832                 |
| <b>A// B3LYP/cc-PVTZ</b>           | 17.18                                                       | 0.321                                                    | 1.9996                | 9.4722                                                      | 0.0123                                                   | 1.832                 |
| <b>B//M062X/6-31G*</b>             | 10.54                                                       | -0.121                                                   | 1.969                 | 4.9861                                                      | -0.2443                                                  | 1.8109                |
| <b>A//M062X/6-31G*</b>             | 12.44                                                       | 0.111                                                    | 1.969                 | 5.9443                                                      | -0.1315                                                  | 1.8109                |
| <b>B//M062X/6-311++G**</b>         | 11.49                                                       | -0.058                                                   | 1.9757                | 5.3615                                                      | -0.2092                                                  | 1.8129                |

|                                   |       |        |        |        |         |        |
|-----------------------------------|-------|--------|--------|--------|---------|--------|
| <b>A//M062X/6-311++G**</b>        | 13.51 | 0.170  | 1.9757 | 6.3659 | -0.0997 | 1.8129 |
| <b>B//M062X/6-311++G(3df,2pd)</b> | 10.55 | -0.084 | 1.9671 | 3.8182 | -0.2601 | 1.7998 |
| <b>A//M062X/6-311++G(3df,2pd)</b> | 12.43 | 0.139  | 1.9671 | 4.6308 | -0.1573 | 1.7998 |
| <b>B//M062X/cc-PVTZ</b>           | 10.59 | -0.092 | 1.9684 | 4.4344 | -0.2432 | 1.8057 |
| <b>A//M062X/cc-PVTZ</b>           | 12.49 | 0.133  | 1.9684 | 5.3443 | -0.1366 | 1.8057 |
| <b>B//MP2 /6-31G*</b>             | 12.01 | -0.024 | 1.9784 | 3.6086 | -0.2703 | 1.8016 |
| <b>A//MP2/6-31G*</b>              | 14.08 | 0.218  | 1.9784 | 4.4327 | -0.159  | 1.8016 |
| <b>B//MP2/6-311++G**</b>          | 10.28 | -0.138 | 1.9641 | 3.3904 | -0.2969 | 1.7984 |
| <b>A//MP2/6-311++G**</b>          | 9.38  | 0.089  | 1.9641 | 1.5357 | -0.189  | 1.7984 |
| <b>B//MP2/6-311++G(3df,2pd)</b>   | 9.14  | -0.126 | 1.9535 | 2.7856 | -0.2746 | 1.7907 |
| <b>A//MP2/6-311++G(3df,2pd)</b>   | 10.71 | 0.095  | 1.9535 | 3.4347 | -0.1717 | 1.7907 |
| <b>B//MP2/cc-PVTZ</b>             | 8.10  | -0.190 | 1.948  | 3.7151 | -0.2614 | 1.7989 |
| <b>A//MP2/cc-PVTZ</b>             | 9.60  | 0.029  | 1.948  | 4.4995 | -0.1625 | 1.7989 |

**Table S5.4** – Impact of the C-Cl bond distance on the unscaled error in  $^{13}\text{C}$  NMR at levels: PCM/mPW1PW91/6-31+G\*\*// B3LYP/6-31G\* (OPTB\_DP4+), B3LYP/6-31G\*\*//B3LYP/6-31G\* (OPTB\_DP4), PCM/mPW1PW91/6-31+G\*\*//MMFF (MMFF\_DP4+), and B3LYP/6-31G\*\*//MMFF (MMFF\_DP4)

| System      | exo-2-Chloronorborene |           |          |           |          |
|-------------|-----------------------|-----------|----------|-----------|----------|
|             | Bond distance (Å)     | OPTB_DP4+ | OPTB_DP4 | MMFF_DP4+ | MMFF_DP4 |
| <b>1.7</b>  |                       | -11.2745  | -11.1649 | -11.5019  | -11.4075 |
| <b>1.71</b> |                       | -9.9133   | -9.874   | -10.1411  | -10.1142 |
| <b>1.72</b> |                       | -8.5191   | -8.5554  | -8.7478   | -8.7939  |
| <b>1.73</b> |                       | -7.0925   | -7.2101  | -7.3225   | -7.4469  |
| <b>1.74</b> |                       | -4.1438   | -5.8384  | -5.8658   | -6.0742  |
| <b>1.75</b> |                       | -2.6229   | -3.0191  | -4.3779   | -4.6761  |
| <b>1.76</b> |                       | -1.0716   | -1.5728  | -2.8594   | -3.2534  |
| <b>1.77</b> |                       | 0.5093    | -0.1032  | -1.3107   | -1.807   |
| <b>1.78</b> |                       | 2.1194    | 1.3892   | 0.267     | -0.337   |
| <b>1.79</b> |                       | 3.758     | 2.9036   | 1.8737    | 1.1556   |
| <b>1.8</b>  |                       | 5.4243    | 4.4391   | 3.5085    | 2.6699   |
| <b>1.81</b> |                       | 7.1181    | 5.9949   | 5.1713    | 4.2049   |
| <b>1.82</b> |                       | 8.8379    | 7.5706   | 6.8608    | 5.7604   |
| <b>1.83</b> |                       | 10.5837   | 9.1651   | 8.5765    | 7.3354   |

|      |         |         |         |         |
|------|---------|---------|---------|---------|
| 1.84 | 12.3546 | 10.7777 | 10.3178 | 8.9291  |
| 1.85 | 14.1497 | 12.4071 | 12.084  | 10.5408 |
| 1.86 | 15.9686 | 14.0531 | 13.8744 | 12.1696 |
| 1.87 | 17.8103 | 15.7145 | 15.6883 | 13.8148 |
| 1.88 | 19.6743 | 17.3908 | 17.5251 | 15.4754 |
| 1.89 | 21.5598 | 19.081  | 19.3838 | 17.1507 |
| 1.9  | 23.4657 | 20.784  | 21.2641 | 18.84   |
| 1.91 | 25.3918 | 22.4994 | 23.1651 | 20.5424 |
| 1.92 | 27.3369 | 24.2261 | 25.086  | 22.2571 |
| 1.93 | 29.3006 | 25.9634 | 27.0261 | 23.9832 |
| 1.94 | 31.2819 | 27.7105 | 28.9846 | 25.72   |
| 1.95 | 33.2799 | 29.4663 | 30.9608 | 27.4665 |
| 1.96 | 35.294  | 31.2302 | 32.954  | 29.2221 |
| 1.97 | 37.3235 | 33.0014 | 34.9633 | 30.9858 |
| 1.98 | 39.3674 | 34.7789 | 36.9879 | 32.7568 |
| 1.99 | 41.425  | 36.5621 | 39.0271 | 34.5344 |

| System            | 1-Chloropropane |          |           |          |
|-------------------|-----------------|----------|-----------|----------|
| Bond distance (Å) | OPTB_DP4+       | OPTB_DP4 | MMFF_DP4+ | MMFF_DP4 |
| 1.7               | -9.1963         | -9.867   | -7.7425   | -8.3251  |
| 1.71              | -7.9679         | -8.7394  | -6.5121   | -7.1903  |
| 1.72              | -6.7106         | -7.5878  | -5.2531   | -6.0316  |
| 1.73              | -5.4249         | -6.4127  | -3.9659   | -4.8497  |
| 1.74              | -4.1113         | -5.2149  | -2.6511   | -3.6452  |
| 1.75              | -2.7702         | -3.9949  | -1.309    | -2.4186  |
| 1.76              | -1.4024         | -2.7534  | 0.0596    | -1.1707  |
| 1.77              | -0.0082         | -1.491   | 1.4545    | 0.098    |
| 1.78              | 1.4116          | -0.2086  | 2.8749    | 1.3868   |
| 1.79              | 2.8566          | 1.0934   | 4.3203    | 2.6951   |
| 1.8               | 4.3262          | 2.4141   | 5.7903    | 4.0222   |
| 1.81              | 5.8197          | 3.753    | 7.2842    | 5.3675   |
| 1.82              | 7.3366          | 5.1093   | 8.8015    | 6.7303   |
| 1.83              | 8.8763          | 6.4823   | 10.3416   | 8.11     |
| 1.84              | 10.4381         | 7.8714   | 11.9038   | 9.5058   |
| 1.85              | 12.0215         | 9.2758   | 13.4876   | 10.9171  |
| 1.86              | 13.6257         | 10.6948  | 15.0923   | 12.3433  |
| 1.87              | 15.2501         | 12.1276  | 16.7173   | 13.7835  |
| 1.88              | 16.894          | 13.5737  | 18.362    | 15.2372  |
| 1.89              | 18.5569         | 15.0323  | 20.0259   | 16.7036  |
| 1.9               | 20.238          | 16.5027  | 21.7082   | 18.182   |
| 1.91              | 21.9367         | 17.9841  | 23.4084   | 19.6718  |
| 1.92              | 23.6523         | 19.476   | 25.1258   | 21.1724  |
| 1.93              | 25.3843         | 20.9775  | 26.8599   | 22.6829  |
| 1.94              | 27.1319         | 22.488   | 28.61     | 24.2028  |
| 1.95              | 28.8945         | 24.0068  | 30.3756   | 25.7314  |
| 1.96              | 30.6716         | 25.5332  | 32.1559   | 27.2679  |
| 1.97              | 32.4623         | 27.0666  | 33.9502   | 28.8118  |

|      |        |         |         |         |
|------|--------|---------|---------|---------|
| 1.98 | 34.266 | 28.6062 | 35.758  | 30.3623 |
| 1.99 | 36.082 | 30.1514 | 37.5785 | 31.9188 |

| System            | Chlorociclohexane |          |           |          |
|-------------------|-------------------|----------|-----------|----------|
| Bond distance (Å) | OPTB_DP4+         | OPTB_DP4 | MMFF_DP4+ | MMFF_DP4 |
| 1.7               | -15.2637          | -15.8626 | -14.8616  | -15.3822 |
| 1.71              | -13.7871          | -14.4685 | -13.3925  | -13.9908 |
| 1.72              | -12.2798          | -13.0486 | -11.8931  | -12.5739 |
| 1.73              | -10.7422          | -11.6035 | -10.3641  | -11.1324 |
| 1.74              | -9.1751           | -10.1341 | -8.8057   | -9.6668  |
| 1.75              | -7.5789           | -8.641   | -7.2186   | -8.1777  |
| 1.76              | -5.9541           | -7.125   | -5.6034   | -6.6659  |
| 1.77              | -4.3015           | -5.5868  | -3.9604   | -5.1321  |
| 1.78              | -2.6216           | -4.0271  | -2.2904   | -3.5768  |
| 1.79              | -0.9151           | -2.4467  | -0.5939   | -2.0009  |
| 1.8               | 0.8173            | -0.8462  | 1.1284    | -0.4051  |
| 1.81              | 2.575             | 0.7734   | 2.876     | 1.21     |
| 1.82              | 4.3573            | 2.4114   | 4.6483    | 2.8436   |
| 1.83              | 6.1635            | 4.067    | 6.4445    | 4.495    |
| 1.84              | 7.9929            | 5.7395   | 8.264     | 6.1633   |
| 1.85              | 9.8449            | 7.428    | 10.1063   | 7.8478   |
| 1.86              | 11.7187           | 9.1317   | 11.9707   | 9.5478   |
| 1.87              | 13.6138           | 10.8497  | 13.8565   | 11.2624  |
| 1.88              | 15.5293           | 12.5814  | 15.763    | 12.991   |
| 1.89              | 17.4647           | 14.3259  | 17.6898   | 14.7327  |
| 1.9               | 19.4192           | 16.0824  | 19.6359   | 16.4868  |
| 1.91              | 21.3921           | 17.8502  | 21.6009   | 18.2526  |
| 1.92              | 23.3826           | 19.6284  | 23.5839   | 20.0292  |
| 1.93              | 25.3901           | 21.4163  | 25.5844   | 21.816   |
| 1.94              | 27.4137           | 23.213   | 27.6015   | 23.6122  |
| 1.95              | 29.4528           | 25.0179  | 29.6346   | 25.417   |
| 1.96              | 31.5064           | 26.8302  | 31.6829   | 27.2298  |
| 1.97              | 33.574            | 28.649   | 33.7456   | 29.0497  |
| 1.98              | 35.6546           | 30.4736  | 35.8222   | 30.876   |
| 1.99              | 37.7476           | 32.3033  | 37.9118   | 32.7079  |

| System            | 1-Chloropropene |          |           |          |
|-------------------|-----------------|----------|-----------|----------|
| Bond distance (Å) | OPTB_DP4+       | OPTB_DP4 | MMFF_DP4+ | MMFF_DP4 |
| 1.7               | -10.5233        | -11.1078 | -9.9596   | -10.4305 |
| 1.71              | -9.8095         | -10.303  | -9.2425   | -9.6229  |
| 1.72              | -9.0739         | -9.4805  | -8.5034   | -8.7972  |
| 1.73              | -8.3168         | -8.6405  | -7.7424   | -7.9536  |
| 1.74              | -7.5382         | -7.7833  | -6.9596   | -7.0925  |
| 1.75              | -6.7383         | -6.9092  | -6.1551   | -6.2141  |
| 1.76              | -5.9172         | -6.0185  | -5.3288   | -5.3185  |
| 1.77              | -5.0748         | -5.1113  | -4.4809   | -4.406   |

|      |         |         |         |         |
|------|---------|---------|---------|---------|
| 1.78 | -4.2112 | -4.1879 | -3.6113 | -3.4769 |
| 1.79 | -3.3265 | -3.2484 | -2.7203 | -2.5313 |
| 1.8  | -2.4211 | -2.2932 | -1.8082 | -1.5695 |
| 1.81 | -1.4951 | -1.3224 | -0.8751 | -0.5918 |
| 1.82 | -0.5486 | -0.3362 | 0.0792  | 0.4018  |
| 1.83 | 0.4185  | 0.6653  | 1.0547  | 1.4111  |
| 1.84 | 1.4061  | 1.6819  | 2.0514  | 2.4357  |
| 1.85 | 2.4143  | 2.7133  | 3.0693  | 3.4757  |
| 1.86 | 3.4432  | 3.7595  | 4.1083  | 4.5306  |
| 1.87 | 4.4925  | 4.8202  | 5.1682  | 5.6004  |
| 1.88 | 5.5623  | 5.8953  | 6.2489  | 6.6847  |
| 1.89 | 6.6523  | 6.9844  | 7.3501  | 7.7835  |

| System            | Chlorobenzene |          |           |          |
|-------------------|---------------|----------|-----------|----------|
| Bond distance (Å) | OPTB_DP4+     | OPTB_DP4 | MMFF_DP4+ | MMFF_DP4 |
| 1.7               | 0.593         | -1.1412  | 0.5942    | -1.1176  |
| 1.71              | 1.3663        | -0.2724  | 1.37      | -0.2475  |
| 1.72              | 2.1605        | 0.6147   | 2.1666    | 0.6409   |
| 1.73              | 2.9756        | 1.5199   | 2.9839    | 1.5473   |
| 1.74              | 3.8115        | 2.4432   | 3.822     | 2.4716   |
| 1.75              | 4.6683        | 3.3841   | 4.6808    | 3.4135   |
| 1.76              | 5.5459        | 4.3426   | 5.5602    | 4.3729   |
| 1.77              | 6.4443        | 5.3183   | 6.4604    | 5.3496   |
| 1.78              | 7.3634        | 6.3112   | 7.3812    | 6.3433   |
| 1.79              | 8.3031        | 7.3208   | 8.3224    | 7.3537   |
| 1.8               | 9.2633        | 8.3469   | 9.284     | 8.3807   |
| 1.81              | 10.2438       | 9.3894   | 10.2659   | 9.424    |
| 1.82              | 11.2446       | 10.4478  | 11.268    | 10.4833  |
| 1.83              | 12.2654       | 11.5219  | 12.2901   | 11.5583  |
| 1.84              | 13.3062       | 12.6114  | 13.3322   | 12.6487  |
| 1.85              | 14.3668       | 13.716   | 14.3941   | 13.7542  |
| 1.86              | 15.4471       | 14.8354  | 15.4758   | 14.8746  |
| 1.87              | 16.5471       | 15.9692  | 16.5771   | 16.0096  |
| 1.88              | 17.6664       | 17.1171  | 17.6979   | 17.1587  |
| 1.89              | 18.805        | 18.2789  | 18.838    | 18.3218  |

| System            | 3-Chlorotoluene |          |           |          |
|-------------------|-----------------|----------|-----------|----------|
| Bond distance (Å) | OPTB_DP4+       | OPTB_DP4 | MMFF_DP4+ | MMFF_DP4 |
| 1.7               | 0.5404          | -1.0306  | 1.2775    | -0.2928  |
| 1.71              | 1.3265          | -0.1641  | 2.068     | 0.579    |
| 1.72              | 2.1336          | 0.721    | 2.8796    | 1.4693   |
| 1.73              | 2.9618          | 1.6243   | 3.7123    | 2.3778   |
| 1.74              | 3.811           | 2.5457   | 4.566     | 3.3043   |
| 1.75              | 4.6811          | 3.485    | 5.4406    | 4.2487   |
| 1.76              | 5.5722          | 4.442    | 6.336     | 5.2107   |
| 1.77              | 6.484           | 5.4163   | 7.252     | 6.1901   |

|      |         |         |         |         |
|------|---------|---------|---------|---------|
| 1.78 | 7.4165  | 6.4078  | 8.1886  | 7.1868  |
| 1.79 | 8.3695  | 7.4163  | 9.1456  | 8.2003  |
| 1.8  | 9.3428  | 8.4414  | 10.123  | 9.2306  |
| 1.81 | 10.3363 | 9.4829  | 11.1205 | 10.2773 |
| 1.82 | 11.3499 | 10.5404 | 12.1382 | 11.3402 |
| 1.83 | 12.3833 | 11.6138 | 13.1758 | 12.419  |
| 1.84 | 13.4364 | 12.7027 | 14.2332 | 13.5134 |
| 1.85 | 14.5091 | 13.8067 | 15.3104 | 14.623  |
| 1.86 | 15.6013 | 14.9256 | 16.4071 | 15.7477 |
| 1.87 | 16.7127 | 16.0591 | 17.5232 | 16.8871 |
| 1.88 | 17.8432 | 17.2068 | 18.6585 | 18.0408 |
| 1.89 | 18.9927 | 18.3683 | 19.813  | 19.2086 |

**Table S5.5** — Impact of the C-Br bond distance on the unscaled error in  $^{13}\text{C}$  NMR at levels: PCM/mPW1PW91/6-31+G\*\*//B3LYP/6-31G\* (OPTB\_DP4+), B3LYP/6-31G\*\*//B3LYP/6-31G\* (OPTB\_DP4), PCM/mPW1PW91/6-31+G\*\*//MMFF (MMFF\_DP4+), and B3LYP/6-31G\*\*//MMFF (MMFF\_DP4)

| System | exo-2-Bromonorbornane |           |          |           |
|--------|-----------------------|-----------|----------|-----------|
|        | Bond distance (Å)     | OPTB_DP4+ | OPTB_DP4 | MMFF_DP4+ |
| 1.80   | -13.87                | -13.66    | -14.35   | -14.10    |
| 1.81   | -12.57                | -12.45    | -13.06   | -12.91    |
| 1.82   | -11.24                | -11.21    | -11.75   | -11.69    |
| 1.83   | -9.88                 | -9.95     | -10.41   | -10.44    |
| 1.84   | -8.49                 | -8.66     | -9.04    | -9.18     |
| 1.85   | -7.07                 | -7.35     | -7.64    | -7.88     |
| 1.86   | -5.63                 | -6.02     | -6.22    | -6.57     |
| 1.87   | -4.16                 | -4.67     | -4.77    | -5.24     |
| 1.88   | -2.67                 | -3.29     | -3.30    | -3.88     |
| 1.89   | -1.15                 | -1.90     | -1.80    | -2.51     |
| 1.90   | 0.40                  | -0.49     | -0.27    | -1.11     |
| 1.91   | 1.97                  | 0.95      | 1.28     | 0.30      |
| 1.92   | 3.56                  | 2.40      | 2.85     | 1.74      |
| 1.93   | 5.18                  | 3.87      | 4.45     | 3.19      |
| 1.94   | 6.82                  | 5.36      | 6.07     | 4.66      |
| 1.95   | 8.49                  | 6.86      | 7.72     | 6.14      |
| 1.96   | 10.17                 | 8.38      | 9.38     | 7.64      |
| 1.97   | 11.88                 | 9.92      | 11.07    | 9.16      |
| 1.98   | 13.61                 | 11.47     | 12.78    | 10.69     |
| 1.99   | 15.36                 | 13.03     | 14.50    | 12.23     |
| 2.00   | 17.12                 | 14.61     | 16.25    | 13.79     |
| 2.01   | 18.91                 | 16.19     | 18.02    | 15.36     |
| 2.02   | 20.71                 | 17.80     | 19.80    | 16.94     |
| 2.03   | 22.54                 | 19.41     | 21.60    | 18.53     |
| 2.04   | 24.38                 | 21.03     | 23.42    | 20.13     |
| 2.05   | 26.23                 | 22.66     | 25.26    | 21.75     |



| System            |           | Bromoethane |           |          |  |
|-------------------|-----------|-------------|-----------|----------|--|
| Bond distance (Å) | OPTB_DP4+ | OPTB_DP4    | MMFF_DP4+ | MMFF_DP4 |  |
| 1.80              | -8.1426   | -8.4857     | -6.4914   | -6.7132  |  |
| 1.81              | -7.0167   | -7.4798     | -5.3623   | -5.6994  |  |
| 1.82              | -5.8655   | -6.4527     | -4.2082   | -4.6645  |  |
| 1.83              | -4.6893   | -5.4047     | -3.0296   | -3.6091  |  |
| 1.84              | -3.4887   | -4.3367     | -1.8267   | -2.5338  |  |
| 1.85              | -2.2641   | -3.2491     | -0.6      | -1.4391  |  |
| 1.86              | -1.016    | -2.1425     | 0.6498    | -0.3256  |  |
| 1.87              | 0.2551    | -1.0175     | 1.9224    | 0.8061   |  |
| 1.88              | 1.5487    | 0.1251      | 3.2175    | 1.9555   |  |
| 1.89              | 2.8646    | 1.2852      | 4.5345    | 3.1219   |  |
| 1.90              | 4.2021    | 2.4618      | 5.873     | 4.3049   |  |
| 1.91              | 5.5608    | 3.6544      | 7.2326    | 5.5039   |  |
| 1.92              | 6.9402    | 4.8626      | 8.6128    | 6.7183   |  |
| 1.93              | 8.3399    | 6.0855      | 10.0131   | 7.9475   |  |
| 1.94              | 9.7593    | 7.3228      | 11.4332   | 9.1910   |  |
| 1.95              | 11.1978   | 8.5738      | 12.8722   | 10.4482  |  |
| 1.96              | 12.655    | 9.8377      | 14.33     | 11.7184  |  |
| 1.97              | 14.1305   | 11.1142     | 15.8058   | 13.0012  |  |
| 1.98              | 15.6236   | 12.4026     | 17.2993   | 14.2958  |  |
| 1.99              | 17.1339   | 13.7023     | 18.8099   | 15.6019  |  |
| 2.00              | 18.6607   | 15.0128     | 20.337    | 16.9188  |  |
| 2.01              | 20.2036   | 16.3334     | 21.8803   | 18.2458  |  |
| 2.02              | 21.7621   | 17.6636     | 23.439    | 19.5825  |  |
| 2.03              | 23.3355   | 19.0027     | 25.0128   | 20.9282  |  |
| 2.04              | 24.9233   | 20.3501     | 26.6014   | 22.2826  |  |
| 2.05              | 26.5252   | 21.7055     | 28.2038   | 23.6448  |  |

| System            |           | Bromociclohexane |           |          |  |
|-------------------|-----------|------------------|-----------|----------|--|
| Bond distance (Å) | OPTB_DP4+ | OPTB_DP4         | MMFF_DP4+ | MMFF_DP4 |  |
| 1.80              | -17.8939  | -13.3688         | -18.8958  | -18.9903 |  |
| 1.81              | -16.4609  | -12.0371         | -17.4994  | -17.6937 |  |
| 1.82              | -15.0009  | -10.6826         | -16.0764  | -16.3747 |  |
| 1.83              | -13.5144  | -9.3058          | -14.6272  | -15.0339 |  |
| 1.84              | -12.0023  | -7.9076          | -13.1525  | -13.6717 |  |
| 1.85              | -10.4648  | -6.4885          | -11.6526  | -12.289  |  |
| 1.86              | -8.9023   | -5.049           | -10.128   | -10.8861 |  |
| 1.87              | -7.3158   | -3.59            | -8.5793   | -9.4639  |  |
| 1.88              | -5.7054   | -2.1121          | -7.0069   | -8.023   |  |
| 1.89              | -4.0716   | -0.6156          | -5.4114   | -6.5639  |  |
| 1.90              | -2.4152   | 0.8983           | -3.7932   | -5.0873  |  |
| 1.91              | -0.7366   | 2.4292           | -2.1529   | -3.5939  |  |
| 1.92              | 0.9639    | 3.9767           | -0.4909   | -2.0842  |  |
| 1.93              | 2.6853    | 5.5398           | 1.1922    | -0.5588  |  |

|      |         |         |         |         |
|------|---------|---------|---------|---------|
| 1.94 | 4.4275  | 7.118   | 2.896   | 0.9816  |
| 1.95 | 6.1895  | 8.7105  | 4.6196  | 2.5363  |
| 1.96 | 7.9709  | 10.3167 | 6.3626  | 4.1046  |
| 1.97 | 9.7711  | 11.9359 | 8.1245  | 5.686   |
| 1.98 | 11.5896 | 13.5677 | 9.9045  | 7.2798  |
| 1.99 | 13.4254 | 15.2109 | 11.7023 | 8.8853  |
| 2.00 | 15.2784 | 16.8654 | 13.5171 | 10.5018 |
| 2.01 | 17.1476 | 18.53   | 15.3486 | 12.129  |
| 2.02 | 19.0326 | 20.2042 | 17.1958 | 13.7657 |
| 2.03 | 20.9328 | 21.8876 | 19.0585 | 15.4116 |
| 2.04 | 22.8475 | 23.5792 | 20.9359 | 17.0659 |
| 2.05 | 24.7762 | 25.2785 | 22.8276 | 18.7282 |

| System            | 1-Bromopropene |          |           |          |
|-------------------|----------------|----------|-----------|----------|
| Bond distance (Å) | OPTB_DP4+      | OPTB_DP4 | MMFF_DP4+ | MMFF_DP4 |
| 1.80              | 6.7128         | 6.9379   | 8.1819    | 8.5577   |
| 1.81              | 7.3147         | 7.6227   | 8.7864    | 9.2479   |
| 1.82              | 7.9361         | 8.3239   | 9.4103    | 9.9546   |
| 1.83              | 8.5767         | 9.0411   | 10.0536   | 10.6774  |
| 1.84              | 9.2365         | 9.7743   | 10.716    | 11.4162  |
| 1.85              | 9.9154         | 10.5232  | 11.3975   | 12.1708  |
| 1.86              | 10.6133        | 11.2877  | 12.0981   | 12.941   |
| 1.87              | 11.3302        | 12.0676  | 12.8178   | 13.7268  |
| 1.88              | 12.0659        | 12.8625  | 13.5565   | 14.5278  |
| 1.89              | 12.8205        | 13.6725  | 14.3142   | 15.3439  |
| 1.90              | 13.5938        | 14.4972  | 15.091    | 16.175   |
| 1.91              | 14.3859        | 15.3365  | 15.8868   | 17.0208  |
| 1.92              | 15.1965        | 16.1901  | 16.7015   | 17.8813  |
| 1.93              | 16.0258        | 17.058   | 17.5351   | 18.7561  |
| 1.94              | 16.8734        | 17.9397  | 18.3873   | 19.6451  |
| 1.95              | 17.7395        | 18.8353  | 19.2582   | 20.5482  |
| 1.96              | 18.6238        | 19.7443  | 20.1476   | 21.4651  |
| 1.97              | 19.5261        | 20.6667  | 21.0553   | 22.3956  |
| 1.98              | 20.4462        | 21.602   | 21.9813   | 23.3395  |
| 1.99              | 21.3842        | 22.5504  | 22.9253   | 24.2966  |
| 2.00              | 22.3397        | 23.5112  | 23.8874   | 25.2667  |

| System            | Bromobenzene |          |           |          |
|-------------------|--------------|----------|-----------|----------|
| Bond distance (Å) | OPTB_DP4+    | OPTB_DP4 | MMFF_DP4+ | MMFF_DP4 |
| 1.80              | 6.3191       | 5.1059   | 6.366     | 5.2015   |
| 1.81              | 7.0123       | 5.8891   | 7.0578    | 5.9828   |
| 1.82              | 7.7239       | 6.6886   | 7.7678    | 6.7802   |
| 1.83              | 8.4538       | 7.504    | 8.4959    | 7.5933   |
| 1.84              | 9.2018       | 8.3351   | 9.2422    | 8.4221   |
| 1.85              | 9.9679       | 9.1816   | 10.0063   | 9.2662   |
| 1.86              | 10.7519      | 10.0434  | 10.7882   | 10.1254  |

|      |         |         |         |         |
|------|---------|---------|---------|---------|
| 1.87 | 11.5537 | 10.9201 | 11.5878 | 10.9995 |
| 1.88 | 12.3732 | 11.8115 | 12.4051 | 11.8883 |
| 1.89 | 13.2103 | 12.7173 | 13.2398 | 12.7914 |
| 1.90 | 14.0648 | 13.6374 | 14.0919 | 13.7087 |
| 1.91 | 14.9368 | 14.5714 | 14.9613 | 14.6399 |
| 1.92 | 15.8259 | 15.5192 | 15.8478 | 15.5848 |
| 1.93 | 16.7322 | 16.4804 | 16.7514 | 16.5432 |
| 1.94 | 17.6554 | 17.4548 | 17.672  | 17.5148 |
| 1.95 | 18.5955 | 18.4422 | 18.6093 | 18.4995 |
| 1.96 | 19.5523 | 19.4423 | 19.5633 | 19.4968 |
| 1.97 | 20.5255 | 20.4548 | 20.5339 | 20.5066 |
| 1.98 | 21.5151 | 21.4795 | 21.5208 | 21.5286 |
| 1.99 | 22.5209 | 22.5161 | 22.5239 | 22.5626 |
| 2.00 | 23.5428 | 23.5642 | 23.5431 | 23.6083 |

| System            | 3-Bromotoluene |          |           |          |
|-------------------|----------------|----------|-----------|----------|
| Bond distance (Å) | OPTB_DP4+      | OPTB_DP4 | MMFF_DP4+ | MMFF_DP4 |
| 1.80              | 2.682          | 2.1985   | 2.2934    | 1.9245   |
| 1.81              | 3.3919         | 2.9851   | 3.0013    | 2.708    |
| 1.82              | 4.1205         | 3.7885   | 3.7279    | 3.5082   |
| 1.83              | 4.8678         | 4.6084   | 4.4731    | 4.3248   |
| 1.84              | 5.6337         | 5.4446   | 5.2368    | 5.1577   |
| 1.85              | 6.418          | 6.2968   | 6.019     | 6.0066   |
| 1.86              | 7.2207         | 7.1647   | 6.8195    | 6.8712   |
| 1.87              | 8.0417         | 8.0483   | 7.6383    | 7.7514   |
| 1.88              | 8.8809         | 8.9471   | 8.4752    | 8.6469   |
| 1.89              | 9.7381         | 9.8611   | 9.3302    | 9.5575   |
| 1.90              | 10.6133        | 10.79    | 10.2031   | 10.483   |
| 1.91              | 11.5064        | 11.7335  | 11.0939   | 11.4232  |
| 1.92              | 12.4173        | 12.6914  | 12.0025   | 12.3777  |
| 1.93              | 13.3459        | 13.6635  | 12.9288   | 13.3465  |
| 1.94              | 14.2922        | 14.6496  | 13.8728   | 14.3293  |
| 1.95              | 15.2559        | 15.6493  | 14.8343   | 15.3259  |
| 1.96              | 16.2371        | 16.6625  | 15.8133   | 16.3359  |
| 1.97              | 17.2356        | 17.689   | 16.8096   | 17.3593  |
| 1.98              | 18.2512        | 18.7283  | 17.8231   | 18.3957  |
| 1.99              | 19.2839        | 19.7804  | 18.8539   | 19.4448  |
| 2.00              | 20.3337        | 20.845   | 19.9016   | 20.5065  |

**Table S5.6** –Results obtained by removing conflicting signals. Strategy A: Removing bromine attached nucleus. Strategy B: Removing bromine and chlorine attached signals. Strategy C: Removing carbon atoms attached to bromine and chlorine

### Strategy A

|           | DP4    |        |      | MM-DP4+ |        |       | DP4+   |        |       |
|-----------|--------|--------|------|---------|--------|-------|--------|--------|-------|
|           | H data | C data | All  | H data  | C data | All   | H data | C data | All   |
| <b>1</b>  | 89.6   | 88.2   | 99.9 | 66.6    | 99.8   | 100.0 | 89.5   | 100.0  | 100.0 |
| <b>2a</b> | 94.1   | 95.5   | 99.8 | 15.2    | 100.0  | 100.0 | 96.9   | 0.0    | 0.3   |
| <b>2b</b> | 95.6   | 95.8   | 99.8 | 12.9    | 100.0  | 100.0 | 99.5   | 0.7    | 58.4  |
| <b>3</b>  | 0.6    | 2.8    | 0.1  | 3.8     | 1.8    | 25.5  | 1.3    | 84.4   | 69.4  |

### Strategy B

|           | DP4    |        |      | MM-DP4+ |        |       | DP4+   |        |       |
|-----------|--------|--------|------|---------|--------|-------|--------|--------|-------|
|           | H data | C data | All  | H data  | C data | All   | H data | C data | All   |
| <b>1</b>  | 81.7   | 85.2   | 99.6 | 74.5    | 99.8   | 100.0 | 89.5   | 100.0  | 100.0 |
| <b>2a</b> | 25.5   | 37.0   | 30.6 | 2.7     | 28.7   | 17.1  | 4.2    | 37.2   | 48.1  |
| <b>2b</b> | 51.4   | 40.1   | 66.9 | 6.6     | 72.6   | 89.1  | 13.8   | 72.6   | 89.4  |
| <b>3</b>  | 0.6    | 3.3    | 0.2  | 3.8     | 0.7    | 2.9   | 1.3    | 28.3   | 68.3  |

### Strategy C

|           | DP4    |        |       | MM-DP4+ |        |       | DP4+   |        |       |
|-----------|--------|--------|-------|---------|--------|-------|--------|--------|-------|
|           | H data | C data | All   | H data  | C data | All   | H data | C data | All   |
| <b>1</b>  | 92.6   | 85.2   | 100.0 | 65.0    | 99.8   | 100.0 | 96.1   | 100.0  | 100.0 |
| <b>2a</b> | 94.9   | 37.0   | 97.0  | 84.5    | 28.7   | 99.8  | 99.8   | 37.2   | 100.0 |
| <b>2b</b> | 93.1   | 40.1   | 96.3  | 91.5    | 72.6   | 100.0 | 99.8   | 72.6   | 100.0 |
| <b>3</b>  | 0.4    | 3.3    | 0.1   | 1.4     | 0.7    | 0.4   | 10.6   | 28.3   | 11.2  |

**Table S5.7** – Dependence of diamagnetic ( $\sigma^D$ ), paramagnetic ( $\sigma^P$ ), and spin-orbit ( $\sigma^{SO}$ ) contributions of the isotropic shielding values of the  $C\alpha$  with the bond distance, computed for **4** and **5** at the ZORA/mPW1PW/TZP//B3LYP/6-31G\* level of theory.

| Compound | C-X distance (Å) | $\sigma^D$ | $\sigma^P$ | $\sigma^{SO}$ | $\sigma$ |
|----------|------------------|------------|------------|---------------|----------|
| 4        | 1.85             | -125.355   | 236.705    | 236.654       | 2.969    |
| 4        | 1.90             | -134.412   | 236.927    | 236.875       | 2.996    |
| 4        | 1.95             | -143.791   | 237.071    | 237.018       | 3.028    |
| 4        | 2.00             | -153.415   | 237.153    | 237.101       | 3.066    |
| 5        | 1.90             | -104.497   | 234.703    | 234.944       | 10.073   |
| 5        | 1.95             | -112.359   | 234.765    | 234.976       | 10.075   |
| 5        | 2.00             | -121.139   | 234.876    | 235.057       | 10.076   |
| 5        | 2.05             | -129.637   | 235.007    | 235.165       | 10.081   |

**6. Cartesian Coordinates of all significant conformers found at the MMFF and B3LYP/6-31G\* level of theory for all compounds under study**

| 1a_C001       |           |           | H  | -1.643093 | 0.382730  | -2.421892 |
|---------------|-----------|-----------|----|-----------|-----------|-----------|
| MMFF Geometry |           |           | C  | 0.492790  | 2.954255  | -0.607522 |
| C             | -1.411469 | -0.551993 | H  | 0.050662  | 3.940737  | -0.791167 |
| C             | -3.042312 | 1.438797  | H  | 1.062504  | 2.704859  | -1.507144 |
| C             | -0.156313 | 0.424780  | H  | 1.172478  | 3.081160  | 0.235697  |
| C             | -2.695685 | 0.019135  | C  | 0.108132  | 0.322919  | 1.526016  |
| H             | -3.597241 | 1.435309  | H  | -0.648601 | 0.893153  | 2.080631  |
| H             | -2.602490 | -0.016269 | H  | -0.011022 | -0.708773 | 1.865223  |
| C             | -1.841338 | 2.303534  | C  | 1.121101  | -0.008823 | -0.813098 |
| H             | -2.077964 | 3.343087  | H  | 1.042463  | 0.351749  | -1.848186 |
| C             | -0.553539 | 1.903533  | H  | 1.148402  | -1.098316 | -0.903655 |
| O             | -3.866884 | 2.080982  | C  | 1.483092  | 0.783260  | 2.016960  |
| H             | -4.668655 | 1.535044  | H  | 1.545653  | 1.874613  | 1.952286  |
| Br            | -4.310976 | -1.093444 | H  | 1.559625  | 0.556167  | 3.089286  |
| C             | -1.200608 | -2.018709 | C  | 2.477223  | 0.433342  | -0.241548 |
| H             | -1.893478 | -2.705537 | H  | 2.635912  | 1.498975  | -0.421852 |
| H             | -1.373333 | -2.129375 | C  | 2.660133  | 0.142198  | 1.258218  |
| H             | -0.199914 | -2.398492 | Cl | 2.660962  | -1.633550 | 1.600550  |
| C             | -1.565617 | -0.608948 | C  | 3.971370  | 0.722522  | 1.810927  |
| H             | -2.453621 | -1.173252 | H  | 4.855115  | 0.240102  | 1.381073  |
| H             | -0.713561 | -1.115819 | H  | 4.032852  | 0.596491  | 2.898461  |

|    |          |           |           |
|----|----------|-----------|-----------|
| H  | 4.043771 | 1.796016  | 1.602250  |
| Br | 3.892419 | -0.372862 | -1.359346 |

**SCF Energy (SMD/wB97XD/6-31+G\*\*) =**  
**-6264.267312**

**SCF Energy (B3LYP/6-31G\*\*) =**  
**-6264.30343407**

|    |          |           |           |
|----|----------|-----------|-----------|
| H  | 4.017999 | 0.776429  | 2.856420  |
| H  | 4.029552 | 1.891522  | 1.486930  |
| Br | 3.886360 | -0.465213 | -1.331344 |

**SCF Energy (SMD/wB97XD/6-31+G\*\*) =**  
**-6264.265277**

**SCF Energy (B3LYP/6-31G\*\*) =**  
**--6264.29822701**

**1a\_C002**

**MMFF Geometry**

|    |           |           |           |
|----|-----------|-----------|-----------|
| C  | -1.423275 | -0.573731 | -0.398244 |
| C  | -3.047174 | 1.437529  | -0.234541 |
| C  | -0.165107 | 0.419473  | -0.045591 |
| C  | -2.708323 | 0.026245  | 0.258128  |
| H  | -3.642271 | 1.400912  | -1.154540 |
| H  | -2.613735 | 0.021802  | 1.350580  |
| C  | -1.844132 | 2.280212  | -0.504292 |
| H  | -2.080904 | 3.299713  | -0.808499 |
| C  | -0.558057 | 1.878090  | -0.444207 |
| O  | -3.827771 | 2.132939  | 0.738131  |
| H  | -3.264428 | 2.282253  | 1.516268  |
| Br | -4.318041 | -1.102574 | 0.004116  |
| C  | -1.209405 | -2.016339 | 0.148683  |
| H  | -1.908983 | -2.725578 | -0.308487 |
| H  | -1.369432 | -2.073188 | 1.230197  |
| H  | -0.212872 | -2.410408 | -0.058458 |
| C  | -1.583665 | -0.704342 | -1.940869 |
| H  | -2.463782 | -1.295583 | -2.212375 |
| H  | -0.726442 | -1.219692 | -2.387359 |
| H  | -1.679229 | 0.263935  | -2.439969 |
| C  | 0.489320  | 2.899343  | -0.816481 |
| H  | 0.048942  | 3.871970  | -1.066300 |
| H  | 1.046520  | 2.581873  | -1.702307 |
| H  | 1.179849  | 3.083960  | 0.007419  |
| C  | 0.096656  | 0.406713  | 1.496932  |
| H  | -0.663157 | 1.004525  | 2.017258  |
| H  | -0.018565 | -0.604646 | 1.894078  |
| C  | 1.113868  | -0.063790 | -0.815221 |
| H  | 1.037360  | 0.231544  | -1.870838 |
| H  | 1.141355  | -1.156488 | -0.838334 |
| C  | 1.469286  | 0.902965  | 1.959023  |
| H  | 1.528288  | 1.987966  | 1.821627  |
| H  | 1.544683  | 0.747109  | 3.044028  |
| C  | 2.469991  | 0.411466  | -0.270278 |
| H  | 2.630577  | 1.463170  | -0.517924 |
| C  | 2.649593  | 0.216670  | 1.245459  |
| Cl | 2.651568  | -1.533109 | 1.700796  |
| C  | 3.958584  | 0.833251  | 1.762973  |
| H  | 4.844027  | 0.326238  | 1.366179  |

**1a\_C003**

**MMFF Geometry**

|    |           |           |           |
|----|-----------|-----------|-----------|
| C  | -1.418844 | -0.574649 | -0.398621 |
| C  | -3.046214 | 1.430678  | -0.189917 |
| C  | -0.162739 | 0.415835  | -0.036800 |
| C  | -2.700923 | 0.012363  | 0.274593  |
| H  | -3.660169 | 1.407600  | -1.098681 |
| H  | -2.606192 | -0.015293 | 1.366764  |
| C  | -1.847257 | 2.279891  | -0.460919 |
| H  | -2.076672 | 3.305958  | -0.743255 |
| C  | -0.559943 | 1.877719  | -0.419321 |
| O  | -3.802470 | 2.088359  | 0.826731  |
| H  | -4.195573 | 2.882098  | 0.427327  |
| Br | -4.313500 | -1.113509 | -0.006913 |
| C  | -1.200027 | -2.025098 | 0.125251  |
| H  | -1.902632 | -2.727941 | -0.337086 |
| H  | -1.352039 | -2.098364 | 1.206904  |
| H  | -0.205049 | -2.415695 | -0.095326 |
| C  | -1.585637 | -0.681938 | -1.942429 |
| H  | -2.461484 | -1.276785 | -2.219675 |
| H  | -0.726143 | -1.182556 | -2.401102 |
| H  | -1.692397 | 0.293216  | -2.425585 |
| C  | 0.485018  | 2.904747  | -0.781547 |
| H  | 0.042956  | 3.879559  | -1.019524 |
| H  | 1.040890  | 2.598564  | -1.672169 |
| H  | 1.176767  | 3.080894  | 0.043205  |
| C  | 0.101516  | 0.384817  | 1.505211  |
| H  | -0.659053 | 0.974045  | 2.034076  |
| H  | -0.010236 | -0.631817 | 1.889757  |
| C  | 1.116415  | -0.055193 | -0.813550 |
| H  | 1.037885  | 0.251905  | -1.865641 |
| H  | 1.147272  | -1.147399 | -0.849148 |
| C  | 1.473075  | 0.879031  | 1.971894  |
| H  | 1.528603  | 1.965867  | 1.847853  |
| H  | 1.550349  | 0.709835  | 3.054756  |
| C  | 2.471616  | 0.417949  | -0.264556 |
| H  | 2.628662  | 1.473023  | -0.499615 |
| C  | 2.654271  | 0.205360  | 1.248341  |
| Cl | 2.664595  | -1.550160 | 1.681454  |
| C  | 3.961990  | 0.820399  | 1.771061  |

|    |          |           |           |
|----|----------|-----------|-----------|
| H  | 4.848579 | 0.321664  | 1.366406  |
| H  | 4.023641 | 0.750265  | 2.863613  |
| H  | 4.028547 | 1.882264  | 1.508013  |
| Br | 3.889535 | -0.440392 | -1.339160 |

**SCF Energy (SMD/wB97XD/6-31+G\*\*) =  
-6264.264476**

**SCF Energy (B3LYP/6-31G\*\*) =  
-6264.29725926**

|    |          |           |           |
|----|----------|-----------|-----------|
| C  | 4.091677 | 1.185954  | -0.342560 |
| H  | 4.719346 | 0.289032  | -0.349359 |
| H  | 4.623255 | 1.945722  | 0.242782  |
| H  | 4.026217 | 1.554107  | -1.372785 |
| Br | 2.686867 | -1.798917 | -0.871313 |

**SCF Energy (SMD/wB97XD/6-31+G\*\*) =  
-6264.258552**

**SCF Energy (B3LYP/6-31G\*\*) =  
-6264.29410042**

**1a\_C004**

**MMFF Geometry**

|    |           |           |           |
|----|-----------|-----------|-----------|
| C  | -1.720293 | 0.770091  | 1.009501  |
| C  | -3.073912 | 0.221229  | -1.163194 |
| C  | -0.411044 | 1.067490  | 0.087315  |
| C  | -2.766293 | -0.150280 | 0.296073  |
| H  | -3.181683 | -0.662020 | -1.803004 |
| H  | -3.700523 | -0.123893 | 0.873468  |
| C  | -2.087476 | 1.133318  | -1.814468 |
| H  | -2.405727 | 1.494011  | -2.792130 |
| C  | -0.911283 | 1.551562  | -1.303751 |
| O  | -4.330839 | 0.905517  | -1.221147 |
| H  | -5.022077 | 0.248045  | -1.031032 |
| Br | -2.366147 | -2.082087 | 0.386247  |
| C  | -2.467096 | 2.115669  | 1.313357  |
| H  | -3.399036 | 1.929379  | 1.861200  |
| H  | -2.731631 | 2.670688  | 0.409136  |
| H  | -1.866988 | 2.781081  | 1.942968  |
| C  | -1.385729 | 0.200960  | 2.418758  |
| H  | -2.307127 | -0.058760 | 2.955260  |
| H  | -0.866009 | 0.929119  | 3.048832  |
| H  | -0.767593 | -0.698056 | 2.393613  |
| C  | -0.118744 | 2.537271  | -2.125910 |
| H  | -0.625573 | 2.796028  | -3.063144 |
| H  | 0.853854  | 2.132347  | -2.409227 |
| H  | 0.016711  | 3.477806  | -1.584602 |
| C  | 0.486072  | 2.134111  | 0.806312  |
| H  | 0.026587  | 3.127575  | 0.729969  |
| H  | 0.526423  | 1.919199  | 1.877634  |
| C  | 0.425542  | -0.230915 | -0.148813 |
| H  | -0.086859 | -0.873118 | -0.875714 |
| H  | 0.480834  | -0.814247 | 0.773862  |
| C  | 1.946591  | 2.259231  | 0.349915  |
| H  | 1.993033  | 2.783803  | -0.608978 |
| H  | 2.469547  | 2.922387  | 1.053239  |
| C  | 1.857878  | -0.020438 | -0.652942 |
| H  | 1.837320  | 0.354578  | -1.680461 |
| C  | 2.693080  | 0.918663  | 0.235342  |
| Cl | 2.909142  | 0.253098  | 1.903845  |

**1a\_C005**

**MMFF Geometry**

|    |          |          |          |
|----|----------|----------|----------|
| C  | -1.71247 | 0.71572  | 1.03378  |
| C  | -3.19127 | 0.23092  | -1.05901 |
| C  | -0.43726 | 1.03078  | 0.06544  |
| C  | -2.78060 | -0.20440 | 0.35400  |
| H  | -3.44047 | -0.63121 | -1.68774 |
| H  | -3.67593 | -0.22751 | 0.99034  |
| C  | -2.19056 | 1.07597  | -1.78116 |
| H  | -2.51571 | 1.40609  | -2.76658 |
| C  | -0.98287 | 1.47088  | -1.32696 |
| O  | -4.39230 | 1.00571  | -0.95941 |
| H  | -4.68799 | 1.20328  | -1.86379 |
| Br | -2.31995 | -2.12323 | 0.32245  |
| C  | -2.45066 | 2.05588  | 1.38023  |
| H  | -3.38272 | 1.86013  | 1.92428  |
| H  | -2.70928 | 2.64055  | 0.49305  |
| H  | -1.84490 | 2.69834  | 2.02840  |
| C  | -1.32570 | 0.12989  | 2.42301  |
| H  | -2.22759 | -0.09135 | 3.00785  |
| H  | -0.73904 | 0.83165  | 3.02287  |
| H  | -0.75356 | -0.79758 | 2.36688  |
| C  | -0.18823 | 2.39464  | -2.21836 |
| H  | -0.70510 | 2.60563  | -3.16208 |
| H  | 0.77466  | 1.96303  | -2.49246 |
| H  | -0.03330 | 3.36315  | -1.73457 |
| C  | 0.43668  | 2.14922  | 0.73450  |
| H  | -0.05020 | 3.12608  | 0.61859  |
| H  | 0.48586  | 1.98235  | 1.81405  |
| C  | 0.43700  | -0.24610 | -0.15957 |
| H  | -0.05558 | -0.90479 | -0.88514 |
| H  | 0.50353  | -0.82180 | 0.76659  |
| C  | 1.89116  | 2.29559  | 0.26713  |
| H  | 1.92012  | 2.77999  | -0.71356 |
| H  | 2.39771  | 3.00122  | 0.94043  |
| C  | 1.86824  | -0.01414 | -0.65751 |
| H  | 1.84885  | 0.32605  | -1.69656 |
| C  | 2.67312  | 0.97253  | 0.20528  |

|    |         |          |          |
|----|---------|----------|----------|
| Cl | 2.89268 | 0.36770  | 1.89542  |
| C  | 4.06888 | 1.25653  | -0.37170 |
| H  | 4.71916 | 0.37625  | -0.34474 |
| H  | 4.57660 | 2.04832  | 0.19200  |
| H  | 4.00207 | 1.58912  | -1.41386 |
| Br | 2.74460 | -1.77697 | -0.81632 |

**SCF Energy (SMD/wB97XD/6-31+G\*\*) =  
-6264.256829**

**SCF Energy (B3LYP/6-31G\*\*) =  
-6264.29262637**

|    |          |           |           |
|----|----------|-----------|-----------|
| C  | 2.693080 | 0.918663  | 0.235342  |
| Cl | 2.909142 | 0.253098  | 1.903845  |
| C  | 4.091677 | 1.185954  | -0.342560 |
| H  | 4.719346 | 0.289032  | -0.349359 |
| H  | 4.623255 | 1.945722  | 0.242782  |
| H  | 4.026217 | 1.554107  | -1.372785 |
| Br | 2.686867 | -1.798917 | -0.871313 |

**SCF Energy (SMD/wB97XD/6-31+G\*\*) =  
-6264.258938**

**SCF Energy (B3LYP/6-31G\*\*) =  
-6264.29458446**

**1a\_C006**

**MMFF Geometry**

|    |           |           |           |
|----|-----------|-----------|-----------|
| C  | -1.720293 | 0.770091  | 1.009501  |
| C  | -3.073912 | 0.221229  | -1.163194 |
| C  | -0.411044 | 1.067490  | 0.087315  |
| C  | -2.766293 | -0.150280 | 0.296073  |
| H  | -3.181683 | -0.662020 | -1.803004 |
| H  | -3.700523 | -0.123893 | 0.873468  |
| C  | -2.087476 | 1.133318  | -1.814468 |
| H  | -2.405727 | 1.494011  | -2.792130 |
| C  | -0.911283 | 1.551562  | -1.303751 |
| O  | -4.330839 | 0.905517  | -1.221147 |
| H  | -5.022077 | 0.248045  | -1.031032 |
| Br | -2.366147 | -2.082087 | 0.386247  |
| C  | -2.467096 | 2.115669  | 1.313357  |
| H  | -3.399036 | 1.929379  | 1.861200  |
| H  | -2.731631 | 2.670688  | 0.409136  |
| H  | -1.866988 | 2.781081  | 1.942968  |
| C  | -1.385729 | 0.200960  | 2.418758  |
| H  | -2.307127 | -0.058760 | 2.955260  |
| H  | -0.866009 | 0.929119  | 3.048832  |
| H  | -0.767593 | -0.698056 | 2.393613  |
| C  | -0.118744 | 2.537271  | -2.125910 |
| H  | -0.625573 | 2.796028  | -3.063144 |
| H  | 0.853854  | 2.132347  | -2.409227 |
| H  | 0.016711  | 3.477806  | -1.584602 |
| C  | 0.486072  | 2.134111  | 0.806312  |
| H  | 0.026587  | 3.127575  | 0.729969  |
| H  | 0.526423  | 1.919199  | 1.877634  |
| C  | 0.425542  | -0.230915 | -0.148813 |
| H  | -0.086859 | -0.873118 | -0.875714 |
| H  | 0.480834  | -0.814247 | 0.773862  |
| C  | 1.946591  | 2.259231  | 0.349915  |
| H  | 1.993033  | 2.783803  | -0.608978 |
| H  | 2.469547  | 2.922387  | 1.053239  |
| C  | 1.857878  | -0.020438 | -0.652942 |
| H  | 1.837320  | 0.354578  | -1.680461 |

**1a\_C007**

**MMFF Geometry**

|    |           |           |           |
|----|-----------|-----------|-----------|
| C  | -1.399319 | 0.731199  | 1.016352  |
| C  | -3.087517 | 0.207723  | -1.137410 |
| C  | -0.179224 | 1.048085  | 0.079648  |
| C  | -2.722776 | -0.189687 | 0.307575  |
| H  | -3.572633 | -0.672298 | -1.773284 |
| H  | -2.675661 | -0.187199 | 0.902657  |
| C  | -1.902579 | 1.105110  | -1.808576 |
| H  | -2.149876 | 1.440293  | -2.796828 |
| C  | -0.612462 | 1.523113  | -1.310548 |
| O  | -4.000049 | 0.892548  | -1.153388 |
| H  | -4.788075 | 1.810621  | -0.874676 |
| Br | -4.300396 | -2.115973 | 0.351285  |
| C  | -1.162414 | 2.071986  | 1.349446  |
| H  | -1.864813 | 1.877645  | 1.862941  |
| H  | -1.291768 | 2.666861  | 0.460785  |
| H  | -0.166662 | 2.706446  | 2.020080  |
| C  | -1.514689 | 0.145936  | 2.414646  |
| H  | -2.389897 | -0.104608 | 2.967093  |
| H  | -0.650320 | 0.860154  | 3.039681  |
| H  | -1.588650 | -0.762305 | 2.371676  |
| C  | 0.433330  | 2.488672  | -2.155319 |
| H  | -0.012946 | 2.731013  | -3.095841 |
| H  | 1.112580  | 2.075869  | -2.433764 |
| H  | 1.010704  | 3.439156  | -1.632760 |
| C  | 0.157321  | 2.135254  | 0.787121  |
| H  | 0.525858  | 3.120950  | 0.699585  |
| H  | -0.746032 | 1.933689  | 1.860968  |
| C  | 1.108246  | -0.237054 | -0.158781 |
| H  | 1.094136  | -0.882813 | -0.890835 |
| H  | 1.117990  | -0.823355 | 0.761495  |
| C  | 1.213940  | 2.277018  | 0.330436  |
| H  | 1.373195  | 2.790590  | -0.634758 |
| H  | 0.791725  | 2.955937  | 1.026604  |
| C  | 2.406564  | -0.010182 | -0.654025 |



|    |          |           |           |
|----|----------|-----------|-----------|
| H  | 2.442275 | 0.356515  | -1.684345 |
| C  | 2.564982 | 0.946395  | 0.232500  |
| Cl | 3.093506 | 0.297509  | 1.907445  |
| C  | 3.626928 | 1.228668  | -0.338170 |
| H  | 4.611530 | 0.340582  | -0.333647 |
| H  | 3.739652 | 2.000313  | 0.244684  |
| H  | 3.348757 | 1.587843  | -1.371677 |
| Br | 3.916331 | -1.778123 | -0.854847 |

SCF Energy (SMD/wB97XD/6-31+G\*\*) =  
-6264.259884

SCF Energy (B3LYP/6-31G\*\*) =  
-6264.29675105

1a\_C008

MMFF Geometry

|    |           |           |           |
|----|-----------|-----------|-----------|
| C  | -1.403649 | -0.390999 | -0.482641 |
| C  | -3.097012 | 1.445909  | 0.196886  |
| C  | -0.184740 | 0.465095  | 0.182694  |
| C  | -2.727640 | -0.038779 | 0.271466  |
| H  | -3.635403 | 1.675381  | -0.730709 |
| H  | -2.679847 | -0.363542 | 1.316617  |
| C  | -1.911897 | 2.348505  | 0.295214  |
| H  | -2.151566 | 3.407607  | 0.371722  |
| C  | -0.620005 | 1.963302  | 0.293990  |
| O  | -3.955916 | 1.771342  | 1.290379  |
| H  | -4.376335 | 2.622632  | 1.083276  |
| Br | -4.296503 | -1.071939 | -0.379723 |
| C  | -1.156265 | -1.917602 | -0.385177 |
| H  | -1.855719 | -2.483562 | -1.010284 |
| H  | -1.282235 | -2.279355 | 0.640223  |
| H  | -0.159564 | -2.203265 | -0.729766 |
| C  | -1.528999 | -0.049937 | -1.998813 |
| H  | -2.389825 | -0.543118 | -2.460597 |
| H  | -0.654988 | -0.390706 | -2.563414 |
| H  | -1.634366 | 1.023439  | -2.180705 |
| C  | 0.426326  | 3.046493  | 0.443283  |
| H  | -0.020595 | 4.044329  | 0.522899  |
| H  | 1.094306  | 3.076820  | -0.421558 |
| H  | 1.015392  | 2.899325  | 1.352393  |
| C  | 0.152432  | 0.010548  | 1.648104  |
| H  | 0.523383  | 0.860367  | 2.236448  |
| H  | -0.750677 | -0.312957 | 2.175054  |
| C  | 1.103893  | 0.332397  | -0.704879 |
| H  | 1.090365  | 1.093732  | -1.495838 |
| H  | 1.115111  | -0.620776 | -1.242797 |
| C  | 1.207314  | -1.095881 | 1.774271  |
| H  | 1.365179  | -1.294738 | 2.842744  |
| H  | 0.784702  | -2.026638 | 1.386893  |
| C  | 2.401459  | 0.411187  | 0.104584  |

|    |          |           |           |
|----|----------|-----------|-----------|
| H  | 2.435970 | 1.348087  | 0.665854  |
| C  | 2.559315 | -0.771842 | 1.086490  |
| Cl | 3.090720 | -2.293157 | 0.253007  |
| C  | 3.619280 | -0.448959 | 2.152637  |
| H  | 4.604398 | -0.265626 | 1.710869  |
| H  | 3.731655 | -1.272195 | 2.868090  |
| H  | 3.339394 | 0.444010  | 2.723179  |
| Br | 3.912431 | 0.629569  | -1.133231 |

SCF Energy (SMD/wB97XD/6-31+G\*\*) =  
-6264.257043

SCF Energy (B3LYP/6-31G\*\*) =  
-6264.29042194

1a\_C009

MMFF Geometry

|    |           |           |           |
|----|-----------|-----------|-----------|
| C  | -1.407949 | -0.383649 | -0.489082 |
| C  | -3.096645 | 1.463433  | 0.172736  |
| C  | -0.187156 | 0.469347  | 0.179745  |
| C  | -2.734646 | -0.023648 | 0.256947  |
| H  | -3.615908 | 1.694845  | -0.764394 |
| H  | -2.686825 | -0.339023 | 1.304912  |
| C  | -1.907836 | 2.359526  | 0.280082  |
| H  | -2.153797 | 3.419471  | 0.341713  |
| C  | -0.618179 | 1.968770  | 0.292622  |
| O  | -3.978530 | 1.822793  | 1.237556  |
| H  | -3.485605 | 1.738783  | 2.071202  |
| Br | -4.301465 | -1.059854 | -0.379901 |
| C  | -1.166063 | -1.910785 | -0.386933 |
| H  | -1.864942 | -2.475951 | -1.013414 |
| H  | -1.296740 | -2.269560 | 0.638924  |
| H  | -0.168987 | -2.200238 | -0.727340 |
| C  | -1.526409 | -0.046288 | -2.006537 |
| H  | -2.392273 | -0.531139 | -2.467830 |
| H  | -0.655199 | -0.398767 | -2.568300 |
| H  | -1.619046 | 1.027638  | -2.192123 |
| C  | 0.430573  | 3.049605  | 0.443121  |
| H  | -0.014435 | 4.048366  | 0.522004  |
| H  | 1.100230  | 3.077976  | -0.420478 |
| H  | 1.017644  | 2.901103  | 1.353328  |
| C  | 0.146345  | 0.013052  | 1.645223  |
| H  | 0.517978  | 0.861689  | 2.234864  |
| H  | -0.758664 | -0.308802 | 2.170041  |
| C  | 1.102205  | 0.333403  | -0.706344 |
| H  | 1.091646  | 1.095109  | -1.496988 |
| H  | 1.111055  | -0.619672 | -1.244521 |
| C  | 1.198839  | -1.095503 | 1.773132  |
| H  | 1.355614  | -1.293278 | 2.841979  |
| H  | 0.773893  | -2.025789 | 1.387074  |

|    |          |           |           |
|----|----------|-----------|-----------|
| C  | 2.399344 | 0.407827  | 0.104207  |
| H  | 2.435963 | 1.344324  | 0.666079  |
| C  | 2.552434 | -0.776258 | 1.085637  |
| Cl | 3.077396 | -2.299357 | 0.251977  |
| C  | 3.613358 | -0.458113 | 2.152246  |
| H  | 4.599421 | -0.278832 | 1.710933  |
| H  | 3.722005 | -1.281994 | 2.867536  |
| H  | 3.336995 | 0.435879  | 2.722904  |
| Br | 3.912127 | 0.621576  | -1.131613 |

**SCF Energy (SMD/wB97XD/6-31+G\*\*) =**  
**-6264.257843**

**SCF Energy (B3LYP/6-31G\*\*) =**  
**-6264.291669**

|    |          |           |           |
|----|----------|-----------|-----------|
| H  | 1.573963 | 1.752457  | 2.518531  |
| C  | 2.421319 | 0.057946  | -0.373272 |
| H  | 2.622454 | 0.907518  | -1.030006 |
| C  | 2.612417 | 0.476758  | 1.094650  |
| Cl | 4.169256 | 1.384400  | 1.280961  |
| C  | 2.647585 | -0.696264 | 2.088732  |
| H  | 1.774447 | -1.347567 | 1.988944  |
| H  | 2.664292 | -0.333392 | 3.123466  |
| H  | 3.536733 | -1.322303 | 1.959662  |
| Br | 3.771107 | -1.253087 | -0.976180 |

**SCF Energy (SMD/wB97XD/6-31+G\*\*) =**  
**-6264.267337**

**SCF Energy (B3LYP/6-31G\*\*) =**  
**-6264.30200231**

**1b\_C001**

**MMFF Geometry**

|    |           |           |           |
|----|-----------|-----------|-----------|
| C  | -1.513234 | -0.715304 | -0.088626 |
| C  | -3.049661 | 1.240560  | -0.791003 |
| C  | -0.207315 | 0.276376  | -0.169011 |
| C  | -2.756599 | 0.163357  | 0.255067  |
| H  | -3.627674 | 0.838673  | -1.632234 |
| H  | -2.641937 | 0.620088  | 1.245304  |
| C  | -1.815590 | 1.864366  | -1.348814 |
| H  | -2.010336 | 2.698436  | -2.022065 |
| C  | -0.545988 | 1.466834  | -1.122110 |
| O  | -3.819183 | 2.293654  | -0.213174 |
| H  | -4.649762 | 1.892657  | 0.099650  |
| Br | -4.425177 | -0.879316 | 0.498950  |
| C  | -1.358071 | -1.814761 | 1.002253  |
| H  | -2.099706 | -2.611879 | 0.875516  |
| H  | -1.499088 | -1.414745 | 2.011492  |
| H  | -0.385532 | -2.309655 | 0.974577  |
| C  | -1.702847 | -1.460027 | -1.441929 |
| H  | -2.619690 | -2.057740 | -1.454385 |
| H  | -0.882580 | -2.161985 | -1.627292 |
| H  | -1.749089 | -0.779604 | -2.296783 |
| C  | 0.537820  | 2.216331  | -1.859165 |
| H  | 0.133891  | 3.027452  | -2.476684 |
| H  | 1.072484  | 1.551923  | -2.543875 |
| H  | 1.244360  | 2.684135  | -1.173151 |
| C  | 0.086942  | 0.869597  | 1.249998  |
| H  | -0.642531 | 1.652530  | 1.494493  |
| H  | -0.045048 | 0.104098  | 2.018579  |
| C  | 1.035309  | -0.534493 | -0.678016 |
| H  | 0.950592  | -0.688892 | -1.762658 |
| H  | 1.016186  | -1.542209 | -0.253850 |
| C  | 1.483672  | 1.455957  | 1.464474  |
| H  | 1.577590  | 2.386675  | 0.895507  |

**1b\_C002**

**MMFF Geometry**

|    |           |           |           |
|----|-----------|-----------|-----------|
| C  | -1.520657 | -0.721269 | -0.084925 |
| C  | -3.049583 | 1.268736  | -0.737164 |
| C  | -0.213605 | 0.265497  | -0.173266 |
| C  | -2.761253 | 0.157708  | 0.277313  |
| H  | -3.688900 | 0.902466  | -1.549765 |
| H  | -2.646712 | 0.583504  | 1.281384  |
| C  | -1.818890 | 1.857924  | -1.345598 |
| H  | -2.006297 | 2.676516  | -2.038563 |
| C  | -0.551181 | 1.443516  | -1.141057 |
| O  | -3.745721 | 2.330519  | -0.084794 |
| H  | -4.074279 | 2.930117  | -0.775263 |
| Br | -4.429188 | -0.900091 | 0.491208  |
| C  | -1.358448 | -1.825232 | 1.001548  |
| H  | -2.110747 | -2.613991 | 0.886686  |
| H  | -1.477003 | -1.425816 | 2.013809  |
| H  | -0.393347 | -2.332788 | 0.956747  |
| C  | -1.723050 | -1.460283 | -1.439584 |
| H  | -2.627835 | -2.076083 | -1.439265 |
| H  | -0.894123 | -2.145939 | -1.645649 |
| H  | -1.800008 | -0.775258 | -2.288437 |
| C  | 0.530362  | 2.158640  | -1.914895 |
| H  | 0.126700  | 2.956272  | -2.549872 |
| H  | 1.049072  | 1.469829  | -2.587542 |
| H  | 1.250242  | 2.638130  | -1.250616 |
| C  | 0.079342  | 0.875591  | 1.238168  |
| H  | -0.653833 | 1.657122  | 1.475920  |
| H  | -0.046509 | 0.117383  | 2.015122  |
| C  | 1.030794  | -0.552007 | -0.669375 |
| H  | 0.946902  | -0.724787 | -1.751183 |
| H  | 1.014565  | -1.552485 | -0.229307 |
| C  | 1.472949  | 1.473805  | 1.438748  |

|    |          |           |           |
|----|----------|-----------|-----------|
| H  | 1.560626 | 2.392815  | 0.849565  |
| H  | 1.563546 | 1.791901  | 2.486403  |
| C  | 2.416041 | 0.047216  | -0.373877 |
| H  | 2.616671 | 0.885013  | -1.045624 |
| C  | 2.605654 | 0.492621  | 1.086349  |
| Cl | 4.158734 | 1.410157  | 1.255302  |
| C  | 2.645947 | -0.662663 | 2.100759  |
| H  | 1.776769 | -1.320822 | 2.010709  |
| H  | 2.658865 | -0.281726 | 3.129021  |
| H  | 3.538944 | -1.285644 | 1.983954  |
| Br | 3.768544 | -1.271376 | -0.953462 |

**SCF Energy (SMD/wB97XD/6-31+G\*\*) =  
-6264.264626**

**SCF Energy (B3LYP/6-31G\*\*) =  
-6264.29607249**

|    |          |           |           |
|----|----------|-----------|-----------|
| C  | 1.469668 | 1.495622  | 1.413548  |
| H  | 1.560341 | 2.405209  | 0.810421  |
| H  | 1.558923 | 1.829969  | 2.456264  |
| C  | 2.413723 | 0.038053  | -0.374371 |
| H  | 2.616968 | 0.864451  | -1.059341 |
| C  | 2.601562 | 0.506940  | 1.078787  |
| Cl | 4.154864 | 1.425511  | 1.235980  |
| C  | 2.638261 | -0.631542 | 2.112138  |
| H  | 1.768181 | -1.289681 | 2.031376  |
| H  | 2.649944 | -0.233792 | 3.134032  |
| H  | 3.530492 | -1.257726 | 2.007244  |
| Br | 3.764372 | -1.292463 | -0.929123 |

**SCF Energy (SMD/wB97XD/6-31+G\*\*) =  
-6264.265441**

**SCF Energy (B3LYP/6-31G\*\*) =  
-6264.29704547**

**1b\_C003**

**MMFF Geometry**

|    |           |           |           |
|----|-----------|-----------|-----------|
| C  | -1.525431 | -0.719609 | -0.078914 |
| C  | -3.051788 | 1.249821  | -0.791250 |
| C  | -0.216215 | 0.264858  | -0.181695 |
| C  | -2.768963 | 0.166799  | 0.255560  |
| H  | -3.669971 | 0.856683  | -1.606816 |
| H  | -2.654234 | 0.622603  | 1.246249  |
| C  | -1.816544 | 1.831319  | -1.396161 |
| H  | -2.011534 | 2.631372  | -2.110402 |
| C  | -0.549608 | 1.427960  | -1.169043 |
| O  | -3.775639 | 2.331679  | -0.204647 |
| H  | -3.173094 | 2.797701  | 0.399567  |
| Br | -4.433363 | -0.881447 | 0.503267  |
| C  | -1.368519 | -1.799621 | 1.032035  |
| H  | -2.116398 | -2.593980 | 0.927100  |
| H  | -1.497827 | -1.379115 | 2.034444  |
| H  | -0.400600 | -2.303232 | 1.006629  |
| C  | -1.721139 | -1.488122 | -1.418032 |
| H  | -2.630950 | -2.096492 | -1.411678 |
| H  | -0.895570 | -2.184434 | -1.600683 |
| H  | -1.784723 | -0.822206 | -2.283060 |
| C  | 0.534724  | 2.131583  | -1.949910 |
| H  | 0.132975  | 2.919553  | -2.598059 |
| H  | 1.055991  | 1.432670  | -2.610043 |
| H  | 1.252169  | 2.621254  | -1.290486 |
| C  | 0.075020  | 0.897532  | 1.219877  |
| H  | -0.657157 | 1.684350  | 1.442909  |
| H  | -0.053817 | 0.152759  | 2.009200  |
| C  | 1.027563  | -0.563045 | -0.662159 |
| H  | 0.944957  | -0.753247 | -1.741164 |
| H  | 1.008170  | -1.556214 | -0.205700 |

**1b\_C004**

**MMFF Geometry**

|    |           |           |           |
|----|-----------|-----------|-----------|
| C  | -1.474702 | -0.437817 | -0.519655 |
| C  | -3.050328 | 1.479019  | 0.197760  |
| C  | -0.186615 | 0.356563  | 0.100758  |
| C  | -2.745647 | -0.017732 | 0.286166  |
| H  | -3.565712 | 1.736673  | -0.735325 |
| H  | -2.663125 | -0.323236 | 1.334963  |
| C  | -1.821989 | 2.316398  | 0.294558  |
| H  | -2.018131 | 3.382071  | 0.406377  |
| C  | -0.550471 | 1.869576  | 0.253745  |
| O  | -3.900594 | 1.872954  | 1.274244  |
| H  | -4.715910 | 1.346580  | 1.191902  |
| Br | -4.394225 | -0.975086 | -0.264407 |
| C  | -1.303735 | -1.975571 | -0.437493 |
| H  | -2.074279 | -2.501858 | -1.011451 |
| H  | -1.374434 | -2.333897 | 0.594410  |
| H  | -0.351432 | -2.311885 | -0.855193 |
| C  | -1.642553 | -0.086979 | -2.028889 |
| H  | -2.555613 | -0.518836 | -2.450251 |
| H  | -0.818715 | -0.486865 | -2.629425 |
| H  | -1.680025 | 0.991394  | -2.208103 |
| C  | 0.545031  | 2.902454  | 0.398708  |
| H  | 0.145118  | 3.915372  | 0.524716  |
| H  | 1.179609  | 2.930759  | -0.491344 |
| H  | 1.159272  | 2.702494  | 1.280692  |
| C  | 0.196409  | -0.145505 | 1.538920  |
| H  | 0.600760  | 0.676334  | 2.143635  |
| H  | -0.690861 | -0.480719 | 2.084807  |
| C  | 1.053294  | 0.172185  | -0.847411 |
| H  | 1.013610  | 0.918386  | -1.652240 |
| H  | 1.013734  | -0.795970 | -1.357664 |

|    |          |           |           |
|----|----------|-----------|-----------|
| C  | 1.234180 | -1.272072 | 1.565057  |
| H  | 1.381823 | -1.594417 | 2.604388  |
| H  | 0.817341 | -2.149695 | 1.063862  |
| C  | 2.401542 | 0.238269  | -0.119320 |
| H  | 2.498633 | 1.206151  | 0.376184  |
| C  | 2.587794 | -0.900317 | 0.910352  |
| Cl | 3.693309 | -0.294160 | 2.216136  |
| C  | 3.210164 | -2.196696 | 0.364161  |
| H  | 2.647471 | -2.571194 | -0.498301 |
| H  | 3.202911 | -2.986432 | 1.125690  |
| H  | 4.254066 | -2.069255 | 0.059496  |
| Br | 3.831315 | 0.332929  | -1.464581 |

SCF Energy (SMD/wB97XD/6-31+G\*\*) =  
-6264.261829

SCF Energy (B3LYP/6-31G\*\*) =  
-6264.29840831

|    |           |           |           |
|----|-----------|-----------|-----------|
| H  | -0.327602 | 0.898200  | 0.866866  |
| C  | -1.958500 | -2.112312 | 0.605676  |
| H  | -2.079743 | -2.646248 | -0.341387 |
| H  | -2.470023 | -2.740148 | 1.348449  |
| C  | -1.826461 | 0.138633  | -0.449482 |
| H  | -1.888814 | -0.257139 | -1.467601 |
| C  | -2.636897 | -0.734582 | 0.523635  |
| Cl | -4.303667 | -1.013392 | -0.129508 |
| C  | -2.793534 | -0.141246 | 1.934327  |
| H  | -1.828526 | 0.088791  | 2.395710  |
| H  | -3.307066 | -0.844900 | 2.600716  |
| H  | -3.384223 | 0.780602  | 1.932875  |
| Br | -2.576520 | 1.955194  | -0.644700 |

SCF Energy (SMD/wB97XD/6-31+G\*\*) =  
-6264.258315

SCF Energy (B3LYP/6-31G\*\*) =  
-6264.29299537

### 1b\_C005

#### MMFF Geometry

|    |           |           |           |
|----|-----------|-----------|-----------|
| C  | 1.804310  | -0.787058 | 1.023011  |
| C  | 3.062540  | -0.361178 | -1.232340 |
| C  | 0.432174  | -1.041823 | 0.182323  |
| C  | 2.851406  | 0.063897  | 0.229096  |
| H  | 3.183761  | 0.498065  | -1.901776 |
| H  | 3.813311  | 0.009104  | 0.756942  |
| C  | 1.995886  | -1.234513 | -1.805128 |
| H  | 2.239316  | -1.631949 | -2.790126 |
| C  | 0.830026  | -1.579677 | -1.221175 |
| O  | 4.276118  | -1.114838 | -1.332621 |
| H  | 5.011306  | -0.488132 | -1.218968 |
| Br | 2.542690  | 2.013497  | 0.285069  |
| C  | 2.501891  | -2.160079 | 1.321209  |
| H  | 3.472254  | -2.006681 | 1.809266  |
| H  | 2.685620  | -2.750397 | 0.419327  |
| H  | 1.908305  | -2.778651 | 2.002659  |
| C  | 1.577169  | -0.168711 | 2.432921  |
| H  | 2.538649  | 0.057014  | 2.911314  |
| H  | 1.058268  | -0.854725 | 3.109264  |
| H  | 1.003278  | 0.759385  | 2.417925  |
| C  | -0.057725 | -2.537200 | -1.977415 |
| H  | 0.382304  | -2.840856 | -2.934711 |
| H  | -1.021675 | -2.085960 | -2.216787 |
| H  | -0.211897 | -3.458534 | -1.408773 |
| C  | -0.471374 | -2.047705 | 0.978229  |
| H  | -0.063314 | -3.063382 | 0.902680  |
| H  | -0.444532 | -1.804536 | 2.043985  |
| C  | -0.356182 | 0.289552  | -0.040421 |
| H  | 0.140143  | 0.887271  | -0.814944 |

### 1b\_C006

#### MMFF Geometry

|    |           |           |           |
|----|-----------|-----------|-----------|
| C  | 1.801289  | -0.725210 | 1.052715  |
| C  | 3.178191  | -0.383420 | -1.135569 |
| C  | 0.457953  | -1.008034 | 0.169941  |
| C  | 2.870409  | 0.118687  | 0.281306  |
| H  | 3.433070  | 0.443504  | -1.807757 |
| H  | 3.800968  | 0.119646  | 0.865374  |
| C  | 2.097266  | -1.199891 | -1.769211 |
| H  | 2.346903  | -1.576390 | -2.760151 |
| C  | 0.900300  | -1.518782 | -1.233996 |
| O  | 4.343467  | -1.214391 | -1.073494 |
| H  | 4.570883  | -1.466954 | -1.984053 |
| Br | 2.496639  | 2.055038  | 0.207890  |
| C  | 2.493851  | -2.088334 | 1.403842  |
| H  | 3.464733  | -1.921377 | 1.886094  |
| H  | 2.671267  | -2.714140 | 0.524816  |
| H  | 1.897451  | -2.678127 | 2.108321  |
| C  | 1.524846  | -0.076439 | 2.440252  |
| H  | 2.468921  | 0.120301  | 2.964083  |
| H  | 0.943073  | -0.729423 | 3.097269  |
| H  | 0.993359  | 0.874925  | 2.384324  |
| C  | 0.009924  | -2.426538 | -2.048640 |
| H  | -0.165843 | -3.370205 | -1.524551 |
| H  | 0.460853  | -2.693549 | -3.011787 |
| H  | -0.943558 | -1.953033 | -2.283686 |
| C  | -0.428104 | -2.058544 | 0.928640  |
| H  | 0.005273  | -3.061429 | 0.823778  |
| H  | -0.412181 | -1.849547 | 2.001923  |
| C  | -0.367329 | 0.302526  | -0.051254 |

|    |           |           |           |
|----|-----------|-----------|-----------|
| H  | 0.110721  | 0.910515  | -0.828996 |
| H  | -0.350200 | 0.912275  | 0.855072  |
| C  | -1.910698 | -2.148569 | 0.546033  |
| H  | -2.014280 | -2.654513 | -0.418533 |
| H  | -2.409876 | -2.811574 | 1.266287  |
| C  | -1.836968 | 0.126499  | -0.452926 |
| H  | -1.899032 | -0.245399 | -1.479501 |
| C  | -2.621725 | -0.786302 | 0.503390  |
| Cl | -4.285084 | -1.088902 | -0.148021 |
| C  | -2.783287 | -0.229735 | 1.928072  |
| H  | -1.821298 | 0.017365  | 2.386922  |
| H  | -3.271548 | -0.962350 | 2.582075  |
| H  | -3.399275 | 0.675135  | 1.951766  |
| Br | -2.630845 | 1.929342  | -0.604185 |

**SCF Energy (SMD/wB97XD/6-31+G\*\*) =**  
**-6264.256731**

**SCF Energy (B3LYP/6-31G\*\*) =**  
**-6264.29166748**

|    |           |           |           |
|----|-----------|-----------|-----------|
| C  | -0.357791 | 0.296440  | -0.049333 |
| H  | 0.127461  | 0.896313  | -0.829119 |
| H  | -0.333452 | 0.909688  | 0.854737  |
| C  | -1.926583 | -2.127829 | 0.592059  |
| H  | -2.041133 | -2.654964 | -0.359707 |
| H  | -2.429307 | -2.768677 | 1.329715  |
| C  | -1.828790 | 0.129594  | -0.450189 |
| H  | -1.892875 | -0.260358 | -1.470173 |
| C  | -2.623292 | -0.758716 | 0.521981  |
| Cl | -4.289006 | -1.056499 | -0.125007 |
| C  | -2.780500 | -0.175044 | 1.936478  |
| H  | -3.385234 | 0.737644  | 1.943179  |
| H  | -1.816313 | 0.067703  | 2.393058  |
| H  | -3.279124 | -0.889842 | 2.602304  |
| Br | -2.603089 | 1.937362  | -0.631755 |

**SCF Energy (SMD/wB97XD/6-31+G\*\*) =**  
**-6264.258687**

**SCF Energy (B3LYP/6-31G\*\*) =**  
**-6264.29348712**

**1b\_C007**

**MMFF Geometry**

|    |           |           |           |
|----|-----------|-----------|-----------|
| C  | 1.812360  | -0.747609 | 1.031056  |
| C  | 3.109527  | -0.356113 | -1.207940 |
| C  | 0.450707  | -1.023013 | 0.177104  |
| C  | 2.866238  | 0.100394  | 0.239006  |
| H  | 3.269151  | 0.496349  | -1.876688 |
| H  | 3.819268  | 0.070968  | 0.784498  |
| C  | 2.037485  | -1.213708 | -1.799274 |
| H  | 2.277090  | -1.587202 | -2.795181 |
| C  | 0.865784  | -1.556429 | -1.225898 |
| O  | 4.326550  | -1.110878 | -1.262700 |
| H  | 4.125985  | -2.025719 | -1.003113 |
| Br | 2.518646  | 2.045442  | 0.245586  |
| C  | 2.506251  | -2.114837 | 1.360982  |
| H  | 3.491971  | -1.955034 | 1.814413  |
| H  | 2.651212  | -2.743559 | 0.478809  |
| H  | 1.925791  | -2.700822 | 2.082008  |
| C  | 1.566104  | -0.108897 | 2.429409  |
| H  | 2.521703  | 0.109108  | 2.923003  |
| H  | 1.023454  | -0.778061 | 3.103770  |
| H  | 1.006867  | 0.827438  | 2.393721  |
| C  | -0.025866 | -2.495384 | -2.002037 |
| H  | 0.416033  | -2.785637 | -2.962642 |
| H  | -0.986708 | -2.036342 | -2.237383 |
| H  | -0.186162 | -3.425251 | -1.449111 |
| C  | -0.440633 | -2.046514 | 0.964762  |
| H  | -0.018886 | -3.056139 | 0.880945  |
| H  | -0.416611 | -1.812249 | 2.032598  |

**1b\_C008**

**MMFF Geometry**

|    |           |           |           |
|----|-----------|-----------|-----------|
| C  | -1.484679 | -0.471501 | -0.493469 |
| C  | -3.056024 | 1.493094  | 0.119837  |
| C  | -0.194490 | 0.364204  | 0.064896  |
| C  | -2.757693 | -0.000919 | 0.284951  |
| H  | -3.609175 | 1.689318  | -0.805862 |
| H  | -2.675636 | -0.251522 | 1.348189  |
| C  | -1.824372 | 2.335145  | 0.113742  |
| H  | -2.019084 | 3.407535  | 0.116171  |
| C  | -0.554245 | 1.885040  | 0.095812  |
| O  | -3.868582 | 1.959659  | 1.197998  |
| H  | -3.331761 | 1.928570  | 2.008125  |
| Br | -4.398718 | -0.997557 | -0.215365 |
| C  | -1.310665 | -2.000208 | -0.303967 |
| H  | -2.079942 | -2.567219 | -0.839469 |
| H  | -1.380917 | -2.284934 | 0.750685  |
| H  | -0.358204 | -2.364844 | -0.696305 |
| C  | -1.656489 | -0.226400 | -2.023091 |
| H  | -2.561078 | -0.701343 | -2.415229 |
| H  | -0.825418 | -0.652122 | -2.595116 |
| H  | -1.712885 | 0.836499  | -2.274789 |
| C  | 0.544189  | 2.924661  | 0.129508  |
| H  | 0.146607  | 3.945640  | 0.166385  |
| H  | 1.168526  | 2.869832  | -0.766381 |
| H  | 1.167725  | 2.805317  | 1.019638  |
| C  | 0.185086  | -0.021367 | 1.538657  |
| H  | 0.591966  | 0.845903  | 2.074707  |

|    |           |           |           |
|----|-----------|-----------|-----------|
| H  | -0.703597 | -0.308559 | 2.108928  |
| C  | 1.046885  | 0.100031  | -0.863748 |
| H  | 1.010313  | 0.777869  | -1.727014 |
| H  | 1.006127  | -0.905768 | -1.294545 |
| C  | 1.218875  | -1.145745 | 1.655153  |
| H  | 1.361534  | -1.388461 | 2.716590  |
| H  | 0.801928  | -2.057792 | 1.219814  |
| C  | 2.394661  | 0.221554  | -0.141678 |
| H  | 2.493639  | 1.227109  | 0.271564  |
| C  | 2.576085  | -0.827543 | 0.980020  |
| Cl | 3.670836  | -0.111513 | 2.238570  |
| C  | 3.203990  | -2.163544 | 0.548241  |
| H  | 2.647614  | -2.609805 | -0.283644 |
| H  | 3.192694  | -2.886985 | 1.372951  |
| H  | 4.249752  | -2.059711 | 0.240982  |
| Br | 3.826633  | 0.201126  | -1.487070 |

SCF Energy (SMD/wB97XD/6-31+G\*\*) =  
-6264.259869

SCF Energy (B3LYP/6-31G\*\*) =  
-6264.29373224

|    |           |           |           |
|----|-----------|-----------|-----------|
| H  | 0.599189  | 0.821749  | 2.087818  |
| H  | -0.695305 | -0.333984 | 2.112739  |
| C  | 1.048622  | 0.114637  | -0.859003 |
| H  | 1.010069  | 0.805485  | -1.711796 |
| H  | 1.009861  | -0.884303 | -1.305525 |
| C  | 1.226915  | -1.164366 | 1.645957  |
| H  | 1.374411  | -1.415471 | 2.704761  |
| H  | 0.808058  | -2.073114 | 1.205602  |
| C  | 2.396132  | 0.227946  | -0.135558 |
| H  | 2.492606  | 1.226329  | 0.295442  |
| C  | 2.580857  | -0.840318 | 0.967047  |
| Cl | 3.689089  | -0.150820 | 2.228635  |
| C  | 3.199935  | -2.171243 | 0.507260  |
| H  | 2.635485  | -2.600846 | -0.327924 |
| H  | 3.192023  | -2.908772 | 1.319439  |
| H  | 4.243686  | -2.066400 | 0.193617  |
| Br | 3.827548  | 0.234473  | -1.482197 |

SCF Energy (SMD/wB97XD/6-31+G\*\*) =  
-6264.258978

SCF Energy (B3LYP/6-31G\*\*) =  
-6264.29224323

### 1b\_C009

#### MMFF Geometry

|    |           |           |           |
|----|-----------|-----------|-----------|
| C  | -1.479318 | -0.470717 | -0.491629 |
| C  | -3.057478 | 1.475658  | 0.162859  |
| C  | -0.192204 | 0.361888  | 0.074687  |
| C  | -2.750947 | -0.018624 | 0.299396  |
| H  | -3.626827 | 1.683047  | -0.751292 |
| H  | -2.669963 | -0.291967 | 1.357169  |
| C  | -1.830055 | 2.324909  | 0.161073  |
| H  | -2.018076 | 3.396756  | 0.191217  |
| C  | -0.557702 | 1.880755  | 0.124220  |
| O  | -3.852181 | 1.894196  | 1.272921  |
| H  | -4.202521 | 2.775792  | 1.062540  |
| Br | -4.392778 | -1.008469 | -0.229035 |
| C  | -1.298570 | -2.001390 | -0.325832 |
| H  | -2.066321 | -2.563367 | -0.868768 |
| H  | -1.366558 | -2.302410 | 0.724441  |
| H  | -0.345067 | -2.356249 | -0.724486 |
| C  | -1.656836 | -0.202499 | -2.016879 |
| H  | -2.556729 | -0.680674 | -2.415699 |
| H  | -0.822583 | -0.610009 | -2.597419 |
| H  | -1.725219 | 0.863704  | -2.251022 |
| C  | 0.537906  | 2.922846  | 0.171057  |
| H  | 0.137844  | 3.942248  | 0.221672  |
| H  | 1.161475  | 2.881870  | -0.726110 |
| H  | 1.162912  | 2.793507  | 1.058722  |
| C  | 0.191664  | -0.039936 | 1.543316  |

### 1c\_C001

#### MMFF Geometry

|    |           |           |           |
|----|-----------|-----------|-----------|
| C  | -1.596885 | 0.300492  | 0.825215  |
| C  | -2.747025 | 0.518585  | -1.494378 |
| C  | -0.174077 | 0.798757  | 0.171260  |
| C  | -2.424786 | -0.392451 | -0.304674 |
| H  | -3.000541 | -0.091938 | -2.368951 |
| H  | -1.862594 | -1.258249 | -0.674128 |
| C  | -1.616871 | 1.429089  | -1.838303 |
| H  | -1.797927 | 2.030474  | -2.728657 |
| C  | -0.477835 | 1.601516  | -1.134434 |
| O  | -3.857701 | 1.379915  | -1.247119 |
| H  | -4.566243 | 0.823883  | -0.875519 |
| Br | -4.101345 | -1.232990 | 0.315384  |
| C  | -2.358637 | 1.512467  | 1.432579  |
| H  | -3.375593 | 1.244309  | 1.735855  |
| H  | -2.434140 | 2.355194  | 0.739993  |
| H  | -1.858696 | 1.882683  | 2.334672  |
| C  | -1.388592 | -0.711130 | 1.990547  |
| H  | -2.300640 | -0.826369 | 2.587708  |
| H  | -0.612659 | -0.398296 | 2.692005  |
| H  | -1.124282 | -1.709175 | 1.626184  |
| C  | 0.473822  | 2.658096  | -1.643321 |
| H  | 0.575418  | 3.470725  | -0.918490 |
| H  | 0.119963  | 3.121736  | -2.571905 |
| H  | 1.455749  | 2.242990  | -1.871133 |

|    |          |           |           |
|----|----------|-----------|-----------|
| C  | 0.600640 | 1.668135  | 1.220558  |
| H  | 0.155112 | 2.669815  | 1.278248  |
| H  | 0.477564 | 1.248617  | 2.222646  |
| C  | 0.689497 | -0.446163 | -0.229177 |
| H  | 0.280665 | -0.903798 | -1.140345 |
| H  | 0.606297 | -1.220514 | 0.538163  |
| C  | 2.112885 | 1.834038  | 1.016502  |
| H  | 2.300514 | 2.538797  | 0.201117  |
| H  | 2.526027 | 2.323716  | 1.909303  |
| C  | 2.183612 | -0.184001 | -0.448245 |
| H  | 2.330246 | 0.392235  | -1.365748 |
| C  | 2.856080 | 0.513627  | 0.748013  |
| Cl | 4.563310 | 0.953299  | 0.329185  |
| C  | 2.906382 | -0.330006 | 2.033238  |
| H  | 3.537373 | -1.217817 | 1.922073  |
| H  | 1.914178 | -0.670245 | 2.343061  |
| H  | 3.320677 | 0.249784  | 2.866978  |
| Br | 3.026762 | -1.914732 | -0.891801 |

**SCF Energy (SMD/wB97XD/6-31+G\*\*) =**  
**-6264.262769**

**SCF Energy (B3LYP/6-31G\*\*) =**  
**-6264.30018434**

|    |          |           |           |
|----|----------|-----------|-----------|
| H  | 0.585350 | 3.484928  | -0.848241 |
| C  | 0.593030 | 1.638607  | 1.259579  |
| H  | 0.147193 | 2.638490  | 1.341776  |
| H  | 0.470046 | 1.194356  | 2.251136  |
| C  | 0.683667 | -0.436546 | -0.247544 |
| H  | 0.276626 | -0.865952 | -1.173140 |
| H  | 0.599665 | -1.234495 | 0.494885  |
| C  | 2.105046 | 1.809769  | 1.059599  |
| H  | 2.292450 | 2.533788  | 0.261185  |
| H  | 2.517971 | 2.278072  | 1.963894  |
| C  | 2.178717 | -0.170427 | -0.454962 |
| H  | 2.329143 | 0.427738  | -1.357430 |
| C  | 2.848904 | 0.496603  | 0.759585  |
| Cl | 4.556549 | 0.947868  | 0.353879  |
| C  | 2.898046 | -0.379381 | 2.022790  |
| H  | 1.905933 | -0.729815 | 2.321051  |
| H  | 3.308941 | 0.179780  | 2.872138  |
| H  | 3.531343 | -1.262652 | 1.890466  |
| Br | 3.022674 | -1.889417 | -0.941067 |

**SCF Energy (SMD/wB97XD/6-31+G\*\*) =**  
**-6264.259235**

**SCF Energy (B3LYP/6-31G\*\*) =**  
**-6264.29240701**

**1c\_C002**

**MMFF Geometry**

|    |           |           |           |
|----|-----------|-----------|-----------|
| C  | -1.599959 | 0.273732  | 0.837637  |
| C  | -2.781372 | 0.590980  | -1.452699 |
| C  | -0.182464 | 0.795433  | 0.189721  |
| C  | -2.438347 | -0.373427 | -0.311678 |
| H  | -3.076923 | 0.015365  | -2.337941 |
| H  | -1.866456 | -1.209471 | -0.731812 |
| C  | -1.638511 | 1.492430  | -1.793674 |
| H  | -1.803946 | 2.108772  | -2.676017 |
| C  | -0.491481 | 1.633519  | -1.095071 |
| O  | -3.869487 | 1.450703  | -1.117776 |
| H  | -4.118251 | 1.937951  | -1.920262 |
| Br | -4.079201 | -1.288929 | 0.289236  |
| C  | -2.355773 | 1.461325  | 1.497635  |
| H  | -3.376392 | 1.185679  | 1.781773  |
| H  | -2.419672 | 2.336747  | 0.845511  |
| H  | -1.857963 | 1.785266  | 2.418611  |
| C  | -1.380590 | -0.779033 | 1.964077  |
| H  | -2.284545 | -0.910087 | 2.570336  |
| H  | -0.592715 | -0.493935 | 2.664191  |
| H  | -1.126733 | -1.765183 | 1.561764  |
| C  | 0.471796  | 2.687632  | -1.588191 |
| H  | 0.119850  | 3.173551  | -2.506053 |
| H  | 1.447856  | 2.266525  | -1.828311 |

**1c\_C003**

**MMFF Geometry**

|    |            |            |            |
|----|------------|------------|------------|
| C  | 1.4853510  | -0.8006290 | -1.0252070 |
| C  | 3.2508740  | -1.3221590 | 0.7735550  |
| C  | 0.3862750  | -0.3525480 | 0.1115520  |
| C  | 2.9627340  | -0.6052130 | -0.5510690 |
| H  | 3.4353080  | -2.3811120 | 0.5546850  |
| H  | 3.6550020  | -0.9978600 | -1.3075410 |
| C  | 2.1219570  | -1.2863680 | 1.7482210  |
| H  | 2.3821550  | -1.6809910 | 2.7305130  |
| C  | 0.8524890  | -0.8998190 | 1.4995710  |
| O  | 4.4283110  | -0.8631620 | 1.4262140  |
| H  | 4.3787230  | 0.1103840  | 1.4377870  |
| Br | 3.5498370  | 1.2764820  | -0.4682080 |
| C  | 1.2872780  | -0.1120510 | -2.4050700 |
| H  | 2.0136080  | -0.4977360 | -3.1316710 |
| H  | 1.4233830  | 0.9705910  | -2.3815680 |
| H  | 0.2955580  | -0.3031750 | -2.8245400 |
| C  | 1.3315760  | -2.3312010 | -1.3349970 |
| H  | 2.1620840  | -2.6905910 | -1.9548070 |
| H  | 0.4148420  | -2.5446850 | -1.8952950 |
| H  | 1.3100260  | -2.9450490 | -0.4297290 |
| C  | -0.1301270 | -1.0623560 | 2.6357100  |
| H  | 0.3553670  | -1.4017140 | 3.5585300  |

|    |            |            |            |
|----|------------|------------|------------|
| H  | -0.8799400 | -1.8197820 | 2.3906510  |
| H  | -0.6235000 | -0.1242290 | 2.8860390  |
| C  | 0.2818150  | 1.2059390  | 0.2215020  |
| H  | 1.0959600  | 1.5943850  | 0.8429580  |
| H  | 0.4050680  | 1.6668280  | -0.7603040 |
| C  | -1.0121570 | -0.9434890 | -0.2965860 |
| H  | -1.0379550 | -2.0152600 | -0.0550240 |
| H  | -1.1177890 | -0.8946380 | -1.3851700 |
| C  | -1.0089160 | 1.7969640  | 0.7977590  |
| H  | -1.0322410 | 1.6322740  | 1.8795280  |
| H  | -0.9675010 | 2.8887200  | 0.6790520  |
| C  | -2.2625980 | -0.2818640 | 0.3010580  |
| H  | -2.3674750 | -0.5483120 | 1.3557430  |
| C  | -2.2835500 | 1.2456660  | 0.1422540  |
| Cl | -3.6831840 | 1.9469170  | 1.0535370  |
| C  | -2.3923900 | 1.7358650  | -1.3108300 |
| H  | -1.6088230 | 1.3161600  | -1.9483600 |
| H  | -2.3001000 | 2.8273650  | -1.3642030 |
| H  | -3.3550990 | 1.4770500  | -1.7637970 |
| Br | -3.8376280 | -1.1550910 | -0.5111590 |

**SCF Energy (SMD/wB97XD/6-31+G\*\*) =**  
**-6264.259102**

**SCF Energy (B3LYP/6-31G\*\*) =**  
**-6264.29634869**

**1c\_C004**

**MMFF Geometry**

|    |           |           |           |
|----|-----------|-----------|-----------|
| C  | 1.488131  | -0.742862 | -1.057458 |
| C  | 3.261252  | -1.332827 | 0.713340  |
| C  | 0.388906  | -0.350899 | 0.098376  |
| C  | 2.965092  | -0.553795 | -0.575472 |
| H  | 3.436641  | -2.380300 | 0.436471  |
| H  | 3.657552  | -0.909603 | -1.350074 |
| C  | 2.130859  | -1.348076 | 1.693759  |
| H  | 2.375114  | -1.787707 | 2.659389  |
| C  | 0.858462  | -0.959312 | 1.460370  |
| O  | 4.463349  | -0.911131 | 1.346295  |
| H  | 4.518481  | -1.333727 | 2.218150  |
| Br | 3.530532  | 1.329616  | -0.432579 |
| C  | 1.281353  | -0.000158 | -2.408216 |
| H  | 2.015503  | -0.343377 | -3.148154 |
| H  | 1.398294  | 1.082733  | -2.339948 |
| H  | 0.294069  | -0.190219 | -2.838566 |
| C  | 1.344923  | -2.260317 | -1.431145 |
| H  | 2.177936  | -2.587514 | -2.065227 |
| H  | 0.429566  | -2.456355 | -2.000075 |
| H  | 1.326822  | -2.912126 | -0.552793 |
| C  | -0.126434 | -1.177030 | 2.585679  |

|    |           |           |           |
|----|-----------|-----------|-----------|
| H  | 0.357977  | -1.554622 | 3.494070  |
| H  | -0.871742 | -1.926562 | 2.305183  |
| H  | -0.625016 | -0.253380 | 2.876170  |
| C  | 0.277622  | 1.200480  | 0.279833  |
| H  | 1.089373  | 1.563016  | 0.919922  |
| H  | 0.400270  | 1.706450  | -0.679567 |
| C  | -1.007222 | -0.928883 | -0.335845 |
| H  | -1.028710 | -2.010404 | -0.142044 |
| H  | -1.113294 | -0.832591 | -1.421136 |
| C  | -1.016017 | 1.759993  | 0.880450  |
| H  | -1.039881 | 1.546831  | 1.953716  |
| H  | -0.978858 | 2.856133  | 0.810944  |
| C  | -2.260358 | -0.299230 | 0.289751  |
| H  | -2.364640 | -0.612656 | 1.331500  |
| C  | -2.287492 | 1.233665  | 0.199157  |
| Cl | -3.691476 | 1.887159  | 1.139265  |
| C  | -2.396935 | 1.787654  | -1.230698 |
| H  | -1.610690 | 1.400378  | -1.885245 |
| H  | -2.309660 | 2.880856  | -1.235201 |
| H  | -3.357901 | 1.544798  | -1.696034 |
| Br | -3.831725 | -1.142563 | -0.560581 |

**SCF Energy (SMD/wB97XD/6-31+G\*\*) =**  
**-6264.255197**

**SCF Energy (B3LYP/6-31G\*\*) =**  
**-6264.28782875**

**1c\_C005**

**MMFF Geometry**

|    |           |            |            |
|----|-----------|------------|------------|
| C  | 1.5774410 | 0.5517120  | -0.7421180 |
| C  | 2.6570420 | 0.0935640  | 1.5775030  |
| C  | 0.1485230 | 0.8540020  | -0.0004040 |
| C  | 2.3581960 | -0.4518070 | 0.1702420  |
| H  | 2.8233240 | -0.7405950 | 2.2689220  |
| H  | 1.7694360 | -1.3705890 | 0.2711810  |
| C  | 1.5688090 | 0.9702910  | 2.1087880  |
| H  | 1.7608860 | 1.3550290  | 3.1097810  |
| C  | 0.4628170 | 1.3652500  | 1.4419110  |
| O  | 3.8303680 | 0.9074010  | 1.6124380  |
| H  | 4.5211330 | 0.4257330  | 1.1225210  |
| Br | 4.0313520 | -1.1470080 | -0.6124520 |
| C  | 2.3910830 | 1.8657650  | -0.9467600 |
| H  | 3.4205850 | 1.6576370  | -1.2558600 |
| H  | 2.4406010 | 2.4861470  | -0.0483570 |
| H  | 1.9627960 | 2.4883000  | -1.7390840 |
| C  | 1.3885010 | -0.0424600 | -2.1613850 |
| H  | 2.3452450 | -0.1585210 | -2.6822580 |
| H  | 0.8001900 | 0.6209960  | -2.8001540 |
| H  | 0.9142290 | -1.0266380 | -2.1488610 |



|    |            |            |            |
|----|------------|------------|------------|
| C  | -0.4480920 | 2.3498310  | 2.1383430  |
| H  | -0.1811740 | 2.4829180  | 3.1932030  |
| H  | -1.4897570 | 2.0278620  | 2.1248820  |
| H  | -0.3730780 | 3.3356380  | 1.6681370  |
| C  | -0.7256500 | 1.8742490  | -0.8137560 |
| H  | -1.2731460 | 2.5581250  | -0.1602220 |
| H  | -0.1042260 | 2.5269180  | -1.4313450 |
| C  | -0.6787140 | -0.4780680 | 0.1790560  |
| H  | -0.3096950 | -1.0338550 | 1.0517020  |
| H  | -0.5309000 | -1.1500820 | -0.6719610 |
| C  | -1.7752740 | 1.2116010  | -1.7137310 |
| H  | -2.2687290 | 1.9838040  | -2.3187560 |
| H  | -1.2699850 | 0.5634560  | -2.4363240 |
| C  | -2.1858360 | -0.2448510 | 0.3296460  |
| H  | -2.3565150 | 0.3863500  | 1.2040310  |
| C  | -2.8237030 | 0.3797020  | -0.9348650 |
| Cl | -4.1455980 | 1.4999950  | -0.3971160 |
| C  | -3.4548390 | -0.6068160 | -1.9317980 |
| H  | -2.7353910 | -1.3760860 | -2.2344730 |
| H  | -3.7794150 | -0.0899400 | -2.8435010 |
| H  | -4.3407490 | -1.1069480 | -1.5265290 |
| Br | -3.0220740 | -1.9317510 | 0.8961880  |

**SCF Energy (SMD/wB97XD/6-31+G\*\*) =**  
**-6264.254522**

**SCF Energy (B3LYP/6-31G\*\*) =**  
**-6264.29333385**

|    |           |           |           |
|----|-----------|-----------|-----------|
| H  | -1.179824 | -2.591267 | 1.386953  |
| C  | 0.102883  | -1.536412 | -2.322720 |
| H  | -0.391352 | -2.086205 | -3.132386 |
| H  | 0.915417  | -2.176188 | -1.966454 |
| H  | 0.519897  | -0.635946 | -2.779633 |
| C  | -0.138544 | 1.143546  | -0.559025 |
| H  | 0.099252  | 1.125133  | -1.628634 |
| H  | -1.045217 | 1.740223  | -0.496234 |
| C  | 1.030874  | -0.826628 | 0.530481  |
| H  | 1.054469  | -1.923677 | 0.484750  |
| H  | 1.150004  | -0.569769 | 1.589674  |
| C  | 0.977313  | 1.931303  | 0.137837  |
| H  | 0.982672  | 2.959849  | -0.246792 |
| H  | 0.730172  | 2.032257  | 1.198650  |
| C  | 2.246625  | -0.237856 | -0.198305 |
| H  | 2.184005  | -0.473392 | -1.261911 |
| C  | 2.377570  | 1.289611  | -0.003028 |
| Cl | 3.165500  | 1.976648  | -1.486042 |
| C  | 3.219021  | 1.743344  | 1.201578  |
| H  | 2.858378  | 1.285696  | 2.129636  |
| H  | 3.162441  | 2.831202  | 1.331993  |
| H  | 4.280572  | 1.498497  | 1.091511  |
| Br | 3.844529  | -1.247299 | 0.340011  |

**SCF Energy (SMD/wB97XD/6-31+G\*\*) =**  
**-6264.254929**

**SCF Energy (B3LYP/6-31G\*\*) =**  
**-6264.29320097**

**1c\_C006**

**MMFF Geometry**

|    |           |           |           |
|----|-----------|-----------|-----------|
| C  | -1.457309 | -0.385650 | 1.212762  |
| C  | -3.180549 | -1.583182 | -0.277768 |
| C  | -0.362032 | -0.308815 | -0.001709 |
| C  | -2.940813 | -0.436173 | 0.709951  |
| H  | -3.239949 | -2.526106 | 0.277980  |
| H  | -3.623779 | -0.567882 | 1.559505  |
| C  | -2.086659 | -1.733567 | -1.277467 |
| H  | -2.342539 | -2.374321 | -2.121067 |
| C  | -0.849037 | -1.203460 | -1.192439 |
| O  | -4.419843 | -1.476356 | -0.969668 |
| H  | -4.460475 | -0.570216 | -1.327508 |
| Br | -3.618956 | 1.256829  | -0.041589 |
| C  | -1.303114 | 0.746304  | 2.256445  |
| H  | -2.049387 | 0.643105  | 3.053834  |
| H  | -1.435470 | 1.742516  | 1.827929  |
| H  | -0.321540 | 0.719268  | 2.740348  |
| C  | -1.259154 | -1.710532 | 2.031616  |
| H  | -2.099133 | -1.878059 | 2.716889  |
| H  | -0.360873 | -1.681428 | 2.657030  |

**1d\_C001**

**MMFF Geometry**

|    |           |           |           |
|----|-----------|-----------|-----------|
| C  | -1.537371 | -0.577715 | -0.198187 |
| C  | -3.044337 | 1.538003  | -0.150760 |
| C  | -0.206172 | 0.359127  | 0.028328  |
| C  | -2.753862 | 0.158347  | 0.450004  |
| H  | -3.649308 | 2.125565  | 0.549734  |
| H  | -2.561327 | 0.281553  | 1.522401  |
| C  | -1.798855 | 2.289881  | -0.478438 |
| H  | -1.982745 | 3.304085  | -0.831564 |
| C  | -0.535540 | 1.816129  | -0.431522 |
| O  | -3.771543 | 1.467165  | -1.376416 |
| H  | -4.511050 | 0.850240  | -1.228894 |
| Br | -4.428630 | -0.888791 | 0.456380  |
| C  | -1.389443 | -1.981902 | 0.458520  |
| H  | -2.145233 | -2.680938 | 0.081904  |
| H  | -1.513021 | -1.942123 | 1.545647  |
| H  | -0.424639 | -2.449215 | 0.251802  |
| C  | -1.762309 | -0.828907 | -1.716167 |
| H  | -2.724383 | -1.313227 | -1.910937 |

|    |           |           |           |
|----|-----------|-----------|-----------|
| H  | -0.995994 | -1.496998 | -2.125062 |
| H  | -1.732402 | 0.091106  | -2.306305 |
| C  | 0.551361  | 2.753977  | -0.900451 |
| H  | 0.157353  | 3.738277  | -1.180346 |
| H  | 1.045358  | 2.360350  | -1.793277 |
| H  | 1.291014  | 2.937942  | -0.120961 |
| C  | 0.148136  | 0.411557  | 1.553004  |
| H  | -0.548983 | 1.072462  | 2.083977  |
| H  | 0.016558  | -0.572061 | 2.010296  |
| C  | 0.996646  | -0.246189 | -0.777705 |
| H  | 0.875092  | -0.012187 | -1.844446 |
| H  | 0.958557  | -1.338232 | -0.728574 |
| C  | 1.567822  | 0.860188  | 1.905342  |
| H  | 1.672936  | 1.929538  | 1.695333  |
| H  | 1.697947  | 0.766531  | 2.992292  |
| C  | 2.408548  | 0.176785  | -0.339594 |
| H  | 2.616355  | 1.198237  | -0.666524 |
| C  | 2.655632  | 0.053064  | 1.173825  |
| Cl | 4.242795  | 0.812579  | 1.605872  |
| C  | 2.686586  | -1.393594 | 1.695035  |
| H  | 1.792395  | -1.954371 | 1.408062  |
| H  | 2.744697  | -1.415135 | 2.789932  |
| H  | 3.553023  | -1.949965 | 1.322347  |
| Br | 3.699818  | -0.865926 | -1.411601 |

**SCF Energy (SMD/wB97XD/6-31+G\*\*) =  
-6264.264346**

**SCF Energy (B3LYP/6-31G\*\*) =  
-6264.30040321**

### 1d\_C002

#### MMFF Geometry

|    |           |           |           |
|----|-----------|-----------|-----------|
| C  | -1.540361 | -0.545910 | -0.288891 |
| C  | -3.057945 | 1.535820  | 0.032477  |
| C  | -0.213343 | 0.350896  | 0.081101  |
| C  | -2.763279 | 0.090086  | 0.447588  |
| H  | -3.698905 | 2.006732  | 0.787285  |
| H  | -2.564818 | 0.078438  | 1.526078  |
| C  | -1.808703 | 2.338242  | -0.141077 |
| H  | -1.980028 | 3.399562  | -0.314255 |
| C  | -0.544488 | 1.863503  | -0.147658 |
| O  | -3.745055 | 1.605161  | -1.215653 |
| H  | -3.996733 | 2.531395  | -1.363825 |
| Br | -4.422237 | -0.972329 | 0.346398  |
| C  | -1.391325 | -2.030330 | 0.157920  |
| H  | -2.136744 | -2.670784 | -0.327909 |
| H  | -1.529481 | -2.150727 | 1.237357  |
| H  | -0.420137 | -2.456646 | -0.101346 |
| C  | -1.753565 | -0.577517 | -1.828603 |

|    |           |           |           |
|----|-----------|-----------|-----------|
| H  | -2.721633 | -1.013313 | -2.095660 |
| H  | -0.993374 | -1.193850 | -2.321755 |
| H  | -1.701787 | 0.415713  | -2.283077 |
| C  | 0.548448  | 2.865437  | -0.436831 |
| H  | 0.157262  | 3.882919  | -0.555737 |
| H  | 1.055803  | 2.624848  | -1.375372 |
| H  | 1.276352  | 2.917627  | 0.372660  |
| C  | 0.138898  | 0.167485  | 1.597061  |
| H  | -0.556732 | 0.742300  | 2.221878  |
| H  | 0.002152  | -0.873680 | 1.898565  |
| C  | 0.991753  | -0.119567 | -0.807220 |
| H  | 0.872580  | 0.280796  | -1.823627 |
| H  | 0.953275  | -1.205757 | -0.931742 |
| C  | 1.559564  | 0.547422  | 2.019314  |
| H  | 1.669501  | 1.635996  | 1.985567  |
| H  | 1.686392  | 0.279596  | 3.077360  |
| C  | 2.402455  | 0.227805  | -0.304341 |
| H  | 2.610397  | 1.288452  | -0.463200 |
| C  | 2.646840  | -0.135567 | 1.170317  |
| Cl | 4.234568  | 0.543370  | 1.719691  |
| C  | 2.674862  | -1.646493 | 1.455242  |
| H  | 1.779055  | -2.152529 | 1.084239  |
| H  | 2.733880  | -1.841699 | 2.532764  |
| H  | 3.539593  | -2.138541 | 0.997796  |
| Br | 3.696467  | -0.629194 | -1.526740 |

**SCF Energy (SMD/wB97XD/6-31+G\*\*) =  
-6264.260800**

**SCF Energy (B3LYP/6-31G\*\*) =  
-6264.29264414**

### 1d\_C003

#### MMFF Geometry

|    |           |           |           |
|----|-----------|-----------|-----------|
| C  | -1.712975 | 0.935724  | 1.113398  |
| C  | -3.337107 | 0.761433  | -0.876265 |
| C  | -0.419282 | 1.070355  | 0.109213  |
| C  | -2.905596 | 0.158197  | 0.466066  |
| H  | -3.983866 | 1.622972  | -0.669239 |
| H  | -3.772783 | 0.173339  | 1.139448  |
| C  | -2.211098 | 1.275271  | -1.709388 |
| H  | -2.515329 | 1.583447  | -2.709803 |
| C  | -0.932252 | 1.455579  | -1.315975 |
| O  | -4.124906 | -0.116654 | -1.670579 |
| H  | -3.660729 | -0.973979 | -1.682525 |
| Br | -2.615988 | -1.785604 | 0.297300  |
| C  | -2.265275 | 2.363799  | 1.456658  |
| H  | -3.226815 | 2.296334  | 1.980068  |
| H  | -2.420134 | 2.981764  | 0.567336  |
| H  | -1.590593 | 2.913505  | 2.121897  |

|    |           |           |           |
|----|-----------|-----------|-----------|
| C  | -1.378704 | 0.315178  | 2.499318  |
| H  | -2.269825 | 0.309712  | 3.139742  |
| H  | -0.614058 | 0.885307  | 3.034349  |
| H  | -1.032274 | -0.718550 | 2.448536  |
| C  | -0.007734 | 2.100635  | -2.321961 |
| H  | 0.310031  | 3.087897  | -1.975210 |
| H  | -0.496147 | 2.260743  | -3.290623 |
| H  | 0.866383  | 1.484323  | -2.527267 |
| C  | 0.539413  | 2.170287  | 0.689899  |
| H  | 0.138953  | 3.168515  | 0.469371  |
| H  | 0.559808  | 2.102864  | 1.781844  |
| C  | 0.355438  | -0.286763 | -0.012460 |
| H  | -0.159394 | -0.938351 | -0.728128 |
| H  | 0.330763  | -0.814486 | 0.943241  |
| C  | 2.005888  | 2.148991  | 0.244556  |
| H  | 2.086315  | 2.508494  | -0.785904 |
| H  | 2.556405  | 2.885513  | 0.846108  |
| C  | 1.825768  | -0.224766 | -0.448480 |
| H  | 1.889065  | 0.006046  | -1.514874 |
| C  | 2.666001  | 0.767344  | 0.369310  |
| Cl | 4.324140  | 0.918043  | -0.344436 |
| C  | 2.838141  | 0.389517  | 1.849747  |
| H  | 3.432753  | -0.520968 | 1.977992  |
| H  | 1.878529  | 0.224785  | 2.348412  |
| H  | 3.354467  | 1.185333  | 2.400015  |
| Br | 2.543519  | -2.065617 | -0.376630 |

**SCF Energy (SMD/wB97XD/6-31+G\*\*) =  
-6264.257817**

**SCF Energy (B3LYP/6-31G\*\*) =  
-6264.29620463**

**1d\_C004**

**MMFF Geometry**

|   |           |           |           |
|---|-----------|-----------|-----------|
| C | -1.503916 | -0.245666 | -0.519297 |
| C | -3.048825 | 1.226356  | 0.964542  |
| C | -0.189240 | 0.250942  | 0.321024  |
| C | -2.746469 | -0.177212 | 0.428608  |
| H | -3.703169 | 1.151209  | 1.841208  |
| H | -2.584464 | -0.843502 | 1.282969  |
| C | -1.807021 | 1.957591  | 1.342229  |

**1d\_C005**

**MMFF Geometry**

|   |          |          |          |
|---|----------|----------|----------|
| C | -1.50850 | -0.24896 | -0.52843 |
| C | -3.05835 | 1.25620  | 0.91353  |
| C | -0.19701 | 0.25041  | 0.31541  |
| C | -2.75581 | -0.16050 | 0.41220  |
| H | -3.74657 | 1.19901  | 1.76539  |
| H | -2.58728 | -0.79961 | 1.28615  |

|    |           |           |           |
|----|-----------|-----------|-----------|
| H  | -1.990222 | 2.897962  | 1.860444  |
| C  | -0.540855 | 1.570755  | 1.084512  |
| O  | -3.712333 | 2.058896  | 0.016509  |
| H  | -4.450291 | 1.536781  | -0.346559 |
| Br | -4.407974 | -0.913993 | -0.346914 |
| C  | -1.340492 | -1.695119 | -1.044089 |
| H  | -2.133048 | -1.962682 | -1.751592 |
| H  | -1.377574 | -2.425959 | -0.230038 |
| H  | -0.404953 | -1.835501 | -1.591701 |
| C  | -1.709019 | 0.654389  | -1.773069 |
| H  | -2.670294 | 0.463560  | -2.260224 |
| H  | -0.943216 | 0.464740  | -2.533155 |
| H  | -1.664187 | 1.721116  | -1.536266 |
| C  | 0.565331  | 2.475592  | 1.580497  |
| H  | 0.176854  | 3.349837  | 2.115865  |
| H  | 1.159974  | 2.863328  | 0.748819  |
| H  | 1.216580  | 1.949683  | 2.283718  |
| C  | 0.251463  | -0.779335 | 1.422220  |
| H  | 0.680761  | -0.261999 | 2.289832  |
| H  | -0.612565 | -1.319194 | 1.821480  |
| C  | 1.010870  | 0.475387  | -0.669891 |
| H  | 0.939058  | 1.478332  | -1.111437 |
| H  | 0.947967  | -0.213273 | -1.519213 |
| C  | 1.288513  | -1.806166 | 0.956544  |
| H  | 1.476803  | -2.515585 | 1.773400  |
| H  | 0.851937  | -2.415997 | 0.161191  |
| C  | 2.388680  | 0.267395  | -0.029290 |
| H  | 2.509000  | 0.961463  | 0.804532  |
| C  | 2.615554  | -1.182805 | 0.457504  |
| Cl | 3.767095  | -1.125260 | 1.859842  |
| C  | 3.219833  | -2.146745 | -0.577744 |
| H  | 2.626369  | -2.158404 | -1.498831 |
| H  | 3.242112  | -3.173429 | -0.191626 |
| H  | 4.251601  | -1.892110 | -0.841223 |
| Br | 3.761875  | 0.907299  | -1.281280 |

**SCF Energy (SMD/wB97XD/6-31+G\*\*) =  
-6264.258715**

**SCF Energy (B3LYP/6-31G\*\*) =  
-6264.29670572**

|    |          |          |          |
|----|----------|----------|----------|
| C  | -1.81354 | 1.97210  | 1.32405  |
| H  | -1.98484 | 2.90251  | 1.86288  |
| C  | -0.54821 | 1.57207  | 1.08099  |
| O  | -3.67988 | 2.06475  | -0.08205 |
| H  | -3.87949 | 2.92674  | 0.31834  |
| Br | -4.40430 | -0.94974 | -0.33109 |
| C  | -1.34647 | -1.70403 | -1.03810 |
| H  | -2.13433 | -1.97537 | -1.74947 |

|    |          |          |          |
|----|----------|----------|----------|
| H  | -1.39130 | -2.42748 | -0.21792 |
| H  | -0.40757 | -1.85129 | -1.57832 |
| C  | -1.70222 | 0.63619  | -1.79412 |
| H  | -2.67099 | 0.45761  | -2.27135 |
| H  | -0.94521 | 0.41946  | -2.55590 |
| H  | -1.63186 | 1.70510  | -1.57360 |
| C  | 0.56243  | 2.45918  | 1.60018  |
| H  | 0.17737  | 3.33117  | 2.14166  |
| H  | 1.16853  | 2.85067  | 0.77850  |
| H  | 1.20195  | 1.91960  | 2.30363  |
| C  | 0.24020  | -0.78187 | 1.41747  |
| H  | 0.66525  | -0.26663 | 2.28813  |
| H  | -0.62540 | -1.32254 | 1.81238  |
| C  | 1.00586  | 0.47429  | -0.67192 |
| H  | 0.93598  | 1.47800  | -1.11210 |
| H  | 0.94419  | -0.21398 | -1.52175 |
| C  | 1.27978  | -1.80840 | 0.95619  |
| H  | 1.46677  | -2.51571 | 1.77521  |
| H  | 0.84593  | -2.42117 | 0.16175  |
| C  | 2.38199  | 0.26450  | -0.02862 |
| H  | 2.50121  | 0.95798  | 0.80574  |
| C  | 2.60743  | -1.18553 | 0.45865  |
| Cl | 3.75700  | -1.12725 | 1.86296  |
| C  | 3.21336  | -2.14959 | -0.57544 |
| H  | 2.62129  | -2.16142 | -1.49742 |
| H  | 3.23515  | -3.17619 | -0.18909 |
| H  | 4.24549  | -1.89490 | -0.83743 |
| Br | 3.75858  | 0.90537  | -1.27638 |

SCF Energy (SMD/wB97XD/6-31+G\*\*) =  
-6264.255105

SCF Energy (B3LYP/6-31G\*\*) =  
-6264.28894811

### 1d\_C006

#### MMFF Geometry

|    |           |           |           |
|----|-----------|-----------|-----------|
| C  | -1.510171 | -0.245562 | -0.523570 |
| C  | -3.058161 | 1.242706  | 0.951980  |
| C  | -0.197046 | 0.254094  | 0.317044  |
| C  | -2.759296 | -0.163623 | 0.416823  |
| H  | -3.706373 | 1.155386  | 1.831922  |
| H  | -2.591697 | -0.819946 | 1.278307  |
| C  | -1.811048 | 1.967848  | 1.339817  |
| H  | -1.990070 | 2.894830  | 1.884342  |
| C  | -0.546955 | 1.578693  | 1.076819  |
| O  | -3.753675 | 2.067118  | 0.019019  |
| H  | -3.112867 | 2.632387  | -0.441841 |
| Br | -4.406131 | -0.938661 | -0.343624 |
| C  | -1.347088 | -1.701250 | -1.033574 |

|    |           |           |           |
|----|-----------|-----------|-----------|
| H  | -2.133806 | -1.972491 | -1.746230 |
| H  | -1.392988 | -2.424691 | -0.213388 |
| H  | -0.407447 | -1.849300 | -1.572183 |
| C  | -1.702776 | 0.638884  | -1.789148 |
| H  | -2.684034 | 0.488233  | -2.249407 |
| H  | -0.964644 | 0.397287  | -2.562254 |
| H  | -1.594226 | 1.705294  | -1.576218 |
| C  | 0.563787  | 2.473671  | 1.582598  |
| H  | 0.178645  | 3.348788  | 2.118951  |
| H  | 1.164210  | 2.860511  | 0.754596  |
| H  | 1.208735  | 1.941307  | 2.286627  |
| C  | 0.240248  | -0.773204 | 1.423302  |
| H  | 0.667861  | -0.253753 | 2.290329  |
| H  | -0.625617 | -1.310176 | 1.822596  |
| C  | 1.005175  | 0.472548  | -0.672436 |
| H  | 0.936639  | 1.474733  | -1.116246 |
| H  | 0.941482  | -0.217880 | -1.520290 |
| C  | 1.277450  | -1.803693 | 0.965473  |
| H  | 1.464320  | -2.507478 | 1.787542  |
| H  | 0.841402  | -2.419348 | 0.174453  |
| C  | 2.381833  | 0.262979  | -0.029721 |
| H  | 2.502883  | 0.960062  | 0.801450  |
| C  | 2.605623  | -1.185363 | 0.463366  |
| Cl | 3.757266  | -1.122630 | 1.865333  |
| C  | 3.208300  | -2.154737 | -0.567590 |
| H  | 2.614648  | -2.169582 | -1.488509 |
| H  | 3.229170  | -3.179707 | -0.176886 |
| H  | 4.240361  | -1.902721 | -0.832423 |
| Br | 3.756703  | 0.896721  | -1.282809 |

SCF Energy (SMD/wB97XD/6-31+G\*\*) =  
-6264.257404

SCF Energy (B3LYP/6-31G\*\*) =  
-6264.29112375

### 1e\_C001

#### MMFF Geometry

|    |           |           |           |
|----|-----------|-----------|-----------|
| C  | -1.296819 | -0.526981 | -0.228204 |
| C  | -3.131017 | 1.275625  | -0.549970 |
| C  | -0.148938 | 0.635533  | -0.030113 |
| C  | -2.672989 | 0.055809  | 0.248374  |
| H  | -3.550692 | 0.997450  | -1.523972 |
| H  | -2.642543 | 0.295434  | 1.317558  |
| C  | -2.022549 | 2.239782  | -0.771864 |
| H  | -2.342221 | 3.213490  | -1.141214 |
| C  | -0.714338 | 2.005704  | -0.552022 |
| O  | -4.145989 | 1.980244  | 0.165434  |
| H  | -4.877116 | 1.351383  | 0.301907  |
| Br | -4.169770 | -1.252161 | 0.188243  |

|    |           |           |           |
|----|-----------|-----------|-----------|
| C  | -1.021000 | -1.814668 | 0.582978  |
| H  | -1.690012 | -2.631299 | 0.288885  |
| H  | -1.172343 | -1.656768 | 1.655171  |
| H  | -0.020528 | -2.208960 | 0.425455  |
| C  | -1.379067 | -0.955557 | -1.720570 |
| H  | -2.242966 | -1.596843 | -1.920006 |
| H  | -0.501306 | -1.543041 | -2.011998 |
| H  | -1.448432 | -0.098969 | -2.397728 |
| C  | 0.233665  | 3.164176  | -0.801683 |
| H  | -0.295710 | 4.122248  | -0.861214 |
| H  | 0.760551  | 3.030295  | -1.751879 |
| H  | 0.968324  | 3.268372  | 0.000982  |
| C  | 0.202928  | 0.859562  | 1.480778  |
| H  | 0.576076  | 1.879797  | 1.631291  |
| H  | -0.701944 | 0.814681  | 2.096870  |
| C  | 1.176255  | 0.335496  | -0.821501 |
| H  | 1.739417  | 1.263269  | -0.965845 |
| H  | 0.953580  | 0.019853  | -1.846227 |
| C  | 1.248862  | -0.080285 | 2.099142  |
| H  | 1.491495  | 0.294221  | 3.103586  |
| H  | 0.807887  | -1.065311 | 2.273591  |
| C  | 2.158087  | -0.638551 | -0.166897 |
| H  | 1.763808  | -1.654825 | -0.193735 |
| C  | 2.540059  | -0.243639 | 1.273944  |
| Cl | 3.435551  | 1.328375  | 1.330301  |
| C  | 3.423812  | -1.302659 | 1.951895  |
| H  | 2.947897  | -2.289370 | 1.918773  |
| H  | 3.596257  | -1.058396 | 3.006880  |
| H  | 4.406431  | -1.391898 | 1.477551  |
| Br | 3.731368  | -0.800274 | -1.353643 |

SCF Energy (SMD/wB97XD/6-31+G\*\*) =  
-6264.262315

SCF Energy (B3LYP/6-31G\*\*) =  
-6264.30095356

### 1e\_C002

#### MMFF Geometry

|   |           |           |           |
|---|-----------|-----------|-----------|
| C | -1.309061 | -0.535576 | -0.239627 |
| C | -3.143670 | 1.278451  | -0.542325 |
| C | -0.157757 | 0.625574  | -0.058365 |
| C | -2.684436 | 0.048588  | 0.244459  |
| H | -3.609395 | 0.996724  | -1.493535 |
| H | -2.646005 | 0.280814  | 1.314842  |
| C | -2.027262 | 2.221712  | -0.822803 |
| H | -2.342549 | 3.179153  | -1.237393 |
| C | -0.718624 | 1.984553  | -0.612950 |
| O | -4.119953 | 2.009450  | 0.202160  |
| H | -3.676982 | 2.385270  | 0.981934  |

|    |           |           |           |
|----|-----------|-----------|-----------|
| Br | -4.171799 | -1.269433 | 0.194140  |
| C  | -1.025146 | -1.818045 | 0.577372  |
| H  | -1.693306 | -2.638412 | 0.291980  |
| H  | -1.170476 | -1.654318 | 1.649420  |
| H  | -0.025068 | -2.210897 | 0.416109  |
| C  | -1.402668 | -0.973131 | -1.729227 |
| H  | -2.267833 | -1.615497 | -1.919000 |
| H  | -0.527862 | -1.563260 | -2.023863 |
| H  | -1.477084 | -0.121021 | -2.411335 |
| C  | 0.236100  | 3.124112  | -0.917555 |
| H  | -0.286173 | 4.083493  | -1.009886 |
| H  | 0.753327  | 2.949134  | -1.866326 |
| H  | 0.977185  | 3.252754  | -0.124081 |
| C  | 0.185946  | 0.885136  | 1.447990  |
| H  | 0.560400  | 1.908550  | 1.574048  |
| H  | -0.721659 | 0.857481  | 2.060752  |
| C  | 1.172125  | 0.302034  | -0.834862 |
| H  | 1.735153  | 1.225398  | -1.004304 |
| H  | 0.954426  | -0.044422 | -1.850508 |
| C  | 1.225953  | -0.042169 | 2.094079  |
| H  | 1.458566  | 0.351265  | 3.093610  |
| H  | 0.784300  | -1.024546 | 2.281392  |
| C  | 2.155967  | -0.649436 | -0.149430 |
| H  | 1.770428  | -1.669206 | -0.154619 |
| C  | 2.525002  | -0.218239 | 1.284137  |
| Cl | 3.411064  | 1.359953  | 1.310124  |
| C  | 3.408655  | -1.255976 | 1.994154  |
| H  | 2.937776  | -2.245570 | 1.981562  |
| H  | 3.572005  | -0.985305 | 3.044124  |
| H  | 4.395199  | -1.351755 | 1.529331  |
| Br | 3.739525  | -0.827886 | -1.320537 |

SCF Energy (SMD/wB97XD/6-31+G\*\*) =  
-6264.26018

SCF Energy (B3LYP/6-31G\*\*) =  
-6264.29611489

### 1e\_C003

#### MMFF Geometry

|   |           |           |           |
|---|-----------|-----------|-----------|
| C | -1.304958 | -0.534173 | -0.235685 |
| C | -3.144558 | 1.281290  | -0.498155 |
| C | -0.155340 | 0.625623  | -0.045088 |
| C | -2.677977 | 0.040901  | 0.265403  |
| H | -3.625735 | 1.011543  | -1.445916 |
| H | -2.639434 | 0.251459  | 1.340310  |
| C | -2.031482 | 2.230463  | -0.774426 |
| H | -2.340519 | 3.199921  | -1.161489 |
| C | -0.720247 | 1.989598  | -0.582433 |
| O | -4.103071 | 1.986182  | 0.292074  |

|    |           |           |           |
|----|-----------|-----------|-----------|
| H  | -4.531744 | 2.638301  | -0.286886 |
| Br | -4.166349 | -1.281878 | 0.184931  |
| C  | -1.015450 | -1.827536 | 0.561945  |
| H  | -1.684477 | -2.644504 | 0.269020  |
| H  | -1.155226 | -1.678866 | 1.636904  |
| H  | -0.016051 | -2.217369 | 0.389969  |
| C  | -1.405184 | -0.950591 | -1.731096 |
| H  | -2.268293 | -1.593989 | -1.926145 |
| H  | -0.529799 | -1.533026 | -2.038962 |
| H  | -1.486795 | -0.089003 | -2.400351 |
| C  | 0.232555  | 3.134291  | -0.873663 |
| H  | 0.977046  | 3.251972  | -0.081712 |
| H  | -0.290095 | 4.094832  | -0.950146 |
| H  | 0.745939  | 2.973316  | -1.827013 |
| C  | 0.193035  | 0.868861  | 1.463112  |
| H  | 0.566547  | 1.891250  | 1.599590  |
| H  | -0.712490 | 0.833105  | 2.078505  |
| C  | 1.172664  | 0.313264  | -0.829235 |
| H  | 1.733840  | 1.239358  | -0.989707 |
| H  | 0.952643  | -0.021696 | -1.848205 |
| C  | 1.236336  | -0.063897 | 2.095536  |
| H  | 1.471674  | 0.318686  | 3.098624  |
| H  | 0.796445  | -1.048885 | 2.273155  |
| C  | 2.159818  | -0.644467 | -0.157569 |
| H  | 1.776056  | -1.664729 | -0.173233 |
| C  | 2.532873  | -0.229302 | 1.279595  |
| Cl | 3.419086  | 1.348606  | 1.320083  |
| C  | 3.419489  | -1.274604 | 1.974794  |
| H  | 2.949053  | -2.264245 | 1.952639  |
| H  | 3.586329  | -1.015726 | 3.027188  |
| H  | 4.404461  | -1.364653 | 1.505507  |
| Br | 3.739815  | -0.807869 | -1.336298 |

SCF Energy (SMD/wB97XD/6-31+G\*\*) =  
-6264.259270

SCF Energy (B3LYP/6-31G\*\*) =  
-6264.29457507

### 1e\_C004

#### MMFF Geometry

|   |           |           |           |
|---|-----------|-----------|-----------|
| C | -1.414762 | -0.646548 | -0.302528 |
| C | -3.086566 | 1.317204  | -0.472736 |
| C | -0.182766 | 0.428546  | -0.244623 |
| C | -2.667378 | 0.061468  | 0.304165  |
| H | -3.749188 | 1.064219  | -1.309766 |
| H | -2.499325 | 0.305746  | 1.359253  |
| C | -1.935230 | 2.086314  | -1.036963 |
| H | -2.220273 | 2.999924  | -1.556748 |
| C | -0.637574 | 1.715469  | -0.995990 |

|    |           |           |           |
|----|-----------|-----------|-----------|
| O  | -3.804182 | 2.207405  | 0.379680  |
| H  | -4.601256 | 1.730988  | 0.672671  |
| Br | -4.260702 | -1.106452 | 0.443296  |
| C  | -1.091393 | -1.938398 | 0.492159  |
| H  | -1.850335 | -2.711926 | 0.330410  |
| H  | -1.043957 | -1.764741 | 1.570501  |
| H  | -0.146027 | -2.386080 | 0.174508  |
| C  | -1.697351 | -1.098927 | -1.769306 |
| H  | -2.598713 | -1.716663 | -1.835009 |
| H  | -0.889672 | -1.718105 | -2.170663 |
| H  | -1.833253 | -0.261120 | -2.458134 |
| C  | 0.362649  | 2.601370  | -1.700093 |
| H  | -0.072104 | 3.566657  | -1.984248 |
| H  | 0.708987  | 2.126144  | -2.623368 |
| H  | 1.224916  | 2.825649  | -1.072856 |
| C  | 0.090265  | 0.860398  | 1.245694  |
| H  | -0.674677 | 1.567249  | 1.592184  |
| H  | 0.016366  | 0.000761  | 1.918666  |
| C  | 1.132838  | -0.189970 | -0.841250 |
| H  | 1.627806  | 0.490276  | -1.539318 |
| H  | 0.907871  | -1.066046 | -1.454203 |
| C  | 1.457820  | 1.503861  | 1.499599  |
| H  | 1.478756  | 2.482624  | 1.010436  |
| H  | 1.525686  | 1.736115  | 2.570889  |
| C  | 2.152662  | -0.587413 | 0.233995  |
| H  | 1.705916  | -1.332712 | 0.901246  |
| C  | 2.651952  | 0.613899  | 1.068730  |
| Cl | 3.791759  | 1.666958  | 0.132930  |
| C  | 3.408325  | 0.133391  | 2.319216  |
| H  | 2.767279  | -0.499737 | 2.943315  |
| H  | 3.735603  | 0.978165  | 2.937049  |
| H  | 4.302013  | -0.446321 | 2.066057  |
| Br | 3.600422  | -1.611621 | -0.618740 |

SCF Energy (SMD/wB97XD/6-31+G\*\*) =  
-6264.256992

SCF Energy (B3LYP/6-31G\*\*) =  
-6264.29404647

### 1e\_C005

#### MMFF Geometry

|   |           |           |           |
|---|-----------|-----------|-----------|
| C | -1.421644 | -0.653809 | -0.300536 |
| C | -3.081082 | 1.337604  | -0.398535 |
| C | -0.190881 | 0.419330  | -0.256023 |
| C | -2.668018 | 0.048026  | 0.330603  |
| H | -3.816113 | 1.121520  | -1.183546 |
| H | -2.494528 | 0.251492  | 1.393715  |
| C | -1.942875 | 2.077581  | -1.033773 |
| H | -2.227242 | 2.974829  | -1.580509 |

|    |           |           |           |
|----|-----------|-----------|-----------|
| C  | -0.649224 | 1.691857  | -1.026868 |
| O  | -3.698923 | 2.224424  | 0.533762  |
| H  | -4.043547 | 2.981272  | 0.031122  |
| Br | -4.262931 | -1.127535 | 0.431536  |
| C  | -1.082890 | -1.947487 | 0.486160  |
| H  | -1.849753 | -2.717523 | 0.347998  |
| H  | -1.003088 | -1.772214 | 1.562316  |
| H  | -0.149167 | -2.401106 | 0.143158  |
| C  | -1.725049 | -1.100949 | -1.764997 |
| H  | -2.585530 | -1.776232 | -1.811108 |
| H  | -0.894241 | -1.658416 | -2.206389 |
| H  | -1.942229 | -0.263724 | -2.433322 |
| C  | 0.341715  | 2.540874  | -1.786744 |
| H  | -0.090757 | 3.499292  | -2.096316 |
| H  | 0.661958  | 2.028418  | -2.699471 |
| H  | 1.219813  | 2.779049  | -1.186003 |
| C  | 0.081898  | 0.874823  | 1.227300  |
| H  | -0.685812 | 1.582446  | 1.565777  |
| H  | 0.015533  | 0.025157  | 1.913862  |
| C  | 1.127131  | -0.207744 | -0.841184 |
| H  | 1.624075  | 0.461058  | -1.548607 |
| H  | 0.904554  | -1.094028 | -1.440265 |
| C  | 1.446148  | 1.532315  | 1.459882  |
| H  | 1.462255  | 2.492690  | 0.934737  |
| H  | 1.515167  | 1.801506  | 2.522290  |
| C  | 2.145399  | -0.585978 | 0.242494  |
| H  | 1.697550  | -1.320399 | 0.921176  |
| C  | 2.641434  | 0.631255  | 1.056519  |
| Cl | 3.789035  | 1.665056  | 0.108463  |
| C  | 3.387556  | 0.173823  | 2.321512  |
| H  | 2.740106  | -0.444252 | 2.954018  |
| H  | 3.713776  | 1.029777  | 2.924304  |
| H  | 4.280697  | -0.414095 | 2.085901  |
| Br | 3.596263  | -1.622665 | -0.589356 |

**SCF Energy (SMD/wB97XD/6-31+G\*\*) =**  
**-6264.254615**

**SCF Energy (B3LYP/6-31G\*\*) =**  
**-6264.28854513**

**1e\_C006**

**MMFF Geometry**

|   |           |            |            |
|---|-----------|------------|------------|
| C | 1.4845140 | -0.4877590 | 1.0933180  |
| C | 3.5034170 | -0.4782090 | -0.5669280 |
| C | 0.4536380 | -0.9664810 | -0.0875780 |
| C | 2.7578800 | 0.2596830  | 0.5447540  |
| H | 4.1277010 | 0.2144750  | -1.1431540 |
| H | 3.4542800 | 0.4248870  | 1.3782370  |
| C | 2.5994690 | -1.1982790 | -1.5053580 |

|    |            |            |            |
|----|------------|------------|------------|
| H  | 3.0881240  | -1.5572500 | -2.4100480 |
| C  | 1.2797740  | -1.4164060 | -1.3455210 |
| O  | 4.4029460  | -1.4306200 | 0.0022510  |
| H  | 4.7683540  | -1.9612580 | -0.7254540 |
| Br | 2.4359960  | 2.1121900  | -0.0576340 |
| C  | 2.0289920  | -1.7386730 | 1.8599740  |
| H  | 2.8588730  | -1.4683660 | 2.5243050  |
| H  | 2.3922540  | -2.5177160 | 1.1831070  |
| H  | 1.2606600  | -2.1848690 | 2.5012660  |
| C  | 0.8664140  | 0.3937010  | 2.2060540  |
| H  | 1.6217050  | 0.6444750  | 2.9623810  |
| H  | 0.0615300  | -0.1090460 | 2.7430050  |
| H  | 0.4831460  | 1.3452940  | 1.8341520  |
| C  | 0.5810320  | -2.1602330 | -2.4718150 |
| H  | 0.4345500  | -3.2111270 | -2.2021950 |
| H  | 1.1683600  | -2.1467220 | -3.3974580 |
| H  | -0.3881900 | -1.7227040 | -2.7207030 |
| C  | -0.4279910 | -2.1987450 | 0.3398670  |
| H  | -0.8666570 | -2.6710290 | -0.5449050 |
| H  | 0.1801620  | -2.9991230 | 0.7727600  |
| C  | -0.5342240 | 0.1605860  | -0.5543780 |
| H  | -0.9168450 | -0.0781790 | -1.5536540 |
| H  | -0.0000930 | 1.0992030  | -0.7056980 |
| C  | -1.6097360 | -1.9040410 | 1.2643890  |
| H  | -2.1547430 | -2.8423530 | 1.4378120  |
| H  | -1.2455140 | -1.6042540 | 2.2501010  |
| C  | -1.7574220 | 0.4178980  | 0.3426660  |
| H  | -1.4590980 | 0.9147270  | 1.2660900  |
| C  | -2.5721440 | -0.8405470 | 0.6968400  |
| Cl | -3.3944030 | -1.5389640 | -0.7578360 |
| C  | -3.6583880 | -0.5531620 | 1.7451490  |
| H  | -3.2249940 | -0.1023300 | 2.6452140  |
| H  | -4.1649920 | -1.4753580 | 2.0537430  |
| H  | -4.4286500 | 0.1287070  | 1.3705440  |
| Br | -2.8514250 | 1.8235610  | -0.5144480 |

**SCF Energy (SMD/wB97XD/6-31+G\*\*) =**  
**-6264.254898**

**SCF Energy (B3LYP/6-31G\*\*) =**  
**-6264.29143804**

**1e\_C007**

**MMFF Geometry**

|   |           |           |           |
|---|-----------|-----------|-----------|
| C | -1.427240 | -0.650548 | -0.300745 |
| C | -3.087182 | 1.334532  | -0.445392 |
| C | -0.192592 | 0.420482  | -0.256297 |
| C | -2.678191 | 0.060151  | 0.312504  |
| H | -3.794525 | 1.098329  | -1.249069 |
| H | -2.507125 | 0.287989  | 1.370904  |

|    |           |           |           |
|----|-----------|-----------|-----------|
| C  | -1.939549 | 2.074687  | -1.060790 |
| H  | -2.228708 | 2.967571  | -1.614554 |
| C  | -0.644897 | 1.694973  | -1.028822 |
| O  | -3.748691 | 2.241998  | 0.435932  |
| H  | -3.072070 | 2.646970  | 1.004647  |
| Br | -4.268238 | -1.113854 | 0.438533  |
| C  | -1.098029 | -1.938467 | 0.499205  |
| H  | -1.860754 | -2.711217 | 0.353024  |
| H  | -1.036176 | -1.756562 | 1.575467  |
| H  | -0.158008 | -2.391821 | 0.173737  |
| C  | -1.720057 | -1.110065 | -1.763571 |
| H  | -2.599901 | -1.759453 | -1.814647 |
| H  | -0.899132 | -1.699305 | -2.182010 |
| H  | -1.899534 | -0.276678 | -2.447673 |
| C  | 0.352310  | 2.547898  | -1.776766 |
| H  | -0.078582 | 3.507127  | -2.086169 |
| H  | 0.681435  | 2.039566  | -2.688606 |
| H  | 1.224593  | 2.784852  | -1.167479 |
| C  | 0.079393  | 0.875281  | 1.226904  |
| H  | -0.686640 | 1.585663  | 1.563356  |
| H  | 0.008526  | 0.026007  | 1.913381  |
| C  | 1.123715  | -0.211086 | -0.840214 |
| H  | 1.621321  | 0.455025  | -1.549735 |
| H  | 0.898634  | -1.098117 | -1.437178 |
| C  | 1.445678  | 1.527054  | 1.464529  |
| H  | 1.464711  | 2.491398  | 0.946887  |
| H  | 1.513952  | 1.788701  | 2.528911  |
| C  | 2.142239  | -0.590008 | 0.243093  |
| H  | 1.693948  | -1.323423 | 0.922505  |
| C  | 2.640265  | 0.626470  | 1.056739  |
| Cl | 3.784304  | 1.661375  | 0.106405  |
| C  | 3.390214  | 0.168687  | 2.319379  |
| H  | 2.745114  | -0.450785 | 2.952922  |
| H  | 3.716910  | 1.024476  | 2.922159  |
| H  | 4.283525  | -0.417863 | 2.081046  |
| Br | 3.591335  | -1.628375 | -0.589011 |

**SCF Energy (SMD/wB97XD/6-31+G\*\*) =  
-6264.255465**

**SCF Energy (B3LYP/6-31G\*\*) =  
-6264.28918930**

**1e\_C008**

**MMFF Geometry**

|   |           |            |            |
|---|-----------|------------|------------|
| C | 1.4903910 | -0.5132640 | 1.0786310  |
| C | 3.4746940 | -0.4727550 | -0.6291660 |
| C | 0.4412080 | -0.9950890 | -0.0836500 |
| C | 2.7488490 | 0.2432220  | 0.5103980  |
| H | 4.0434910 | 0.2321630  | -1.2471790 |

|    |            |            |            |
|----|------------|------------|------------|
| H  | 3.4627860  | 0.3960380  | 1.3313620  |
| C  | 2.5672610  | -1.2384930 | -1.5218340 |
| H  | 3.0600100  | -1.6356900 | -2.4084830 |
| C  | 1.2536190  | -1.4716260 | -1.3377950 |
| O  | 4.4272860  | -1.4049090 | -0.1164060 |
| H  | 5.1659600  | -0.8894650 | 0.2493650  |
| Br | 2.4211050  | 2.1079830  | -0.0446900 |
| C  | 2.0600020  | -1.7653660 | 1.8262720  |
| H  | 2.9018870  | -1.4932210 | 2.4745930  |
| H  | 2.4152440  | -2.5375460 | 1.1373360  |
| H  | 1.3086860  | -2.2202080 | 2.4814910  |
| C  | 0.8881680  | 0.3568240  | 2.2084320  |
| H  | 1.6563560  | 0.6066780  | 2.9520420  |
| H  | 0.0968170  | -0.1531650 | 2.7576520  |
| H  | 0.4931680  | 1.3087660  | 1.8509240  |
| C  | 0.5530160  | -2.2617270 | -2.4296360 |
| H  | 0.4175470  | -3.3034480 | -2.1214900 |
| H  | 1.1316740  | -2.2763240 | -3.3606920 |
| H  | -0.4217490 | -1.8386200 | -2.6835500 |
| C  | -0.4534780 | -2.2080870 | 0.3727550  |
| H  | -0.9005310 | -2.6937070 | -0.5004720 |
| H  | 0.1467390  | -3.0058970 | 0.8209380  |
| C  | -0.5331990 | 0.1344120  | -0.5669260 |
| H  | -0.9259330 | -0.1222280 | -1.5584600 |
| H  | 0.0129970  | 1.0615510  | -0.7436250 |
| C  | -1.6316990 | -1.8834030 | 1.2919180  |
| H  | -2.1903910 | -2.8114030 | 1.4772770  |
| H  | -1.2647620 | -1.5772080 | 2.2742900  |
| C  | -1.7452300 | 0.4258640  | 0.3337760  |
| H  | -1.4318470 | 0.9294850  | 1.2484080  |
| C  | -2.5787700 | -0.8136550 | 0.7105040  |
| Cl | -3.4171150 | -1.5214560 | -0.7300610 |
| C  | -3.6567060 | -0.4926570 | 1.7577240  |
| H  | -3.2132250 | -0.0337240 | 2.6487370  |
| H  | -4.1759990 | -1.4019100 | 2.0831950  |
| H  | -4.4180700 | 0.1944920  | 1.3746750  |
| Br | -2.8201600 | 1.8378280  | -0.5360090 |

**SCF Energy (SMD/wB97XD/6-31+G\*\*) =  
-6264.256795**

**SCF Energy (B3LYP/6-31G\*\*) =  
-6264.29301789**

**1e\_C009**

**MMFF Geometry**

|   |           |           |           |
|---|-----------|-----------|-----------|
| C | -1.588990 | 0.674210  | 1.057698  |
| C | -3.115111 | 0.166523  | -1.022727 |
| C | -0.448918 | 1.202237  | 0.027150  |
| C | -2.627032 | -0.277792 | 0.367800  |



|    |           |           |           |
|----|-----------|-----------|-----------|
| H  | -3.099061 | -0.651980 | -1.751389 |
| H  | -3.497348 | -0.379618 | 1.030699  |
| C  | -2.375679 | 1.315333  | -1.625114 |
| H  | -2.858369 | 1.754696  | -2.497015 |
| C  | -1.207317 | 1.824686  | -1.186273 |
| O  | -4.480776 | 0.586073  | -0.926347 |
| H  | -5.015989 | -0.216107 | -0.798613 |
| Br | -2.064030 | -2.171143 | 0.281562  |
| C  | -2.439437 | 1.895401  | 1.578052  |
| H  | -3.282316 | 1.549115  | 2.189731  |
| H  | -2.863189 | 2.503451  | 0.774679  |
| H  | -1.855085 | 2.560976  | 2.220667  |
| C  | -1.076175 | 0.032007  | 2.367449  |
| H  | -1.911924 | -0.387391 | 2.942984  |
| H  | -0.611225 | 0.767578  | 3.028948  |
| H  | -0.370043 | -0.779759 | 2.211957  |
| C  | -0.603481 | 2.983325  | -1.944370 |
| H  | -0.581055 | 3.881359  | -1.318987 |
| H  | -1.179054 | 3.235255  | -2.842217 |
| H  | 0.412023  | 2.747260  | -2.276757 |
| C  | 0.514848  | 2.245673  | 0.694505  |
| H  | 0.994384  | 2.860589  | -0.073883 |
| H  | -0.037299 | 2.966453  | 1.303560  |
| C  | 0.451068  | 0.106963  | -0.638103 |
| H  | 0.908329  | 0.536157  | -1.542691 |
| H  | -0.157544 | -0.708377 | -1.035586 |
| C  | 1.669913  | 1.672297  | 1.529203  |
| H  | 2.302875  | 2.508503  | 1.857675  |
| H  | 1.288410  | 1.233200  | 2.452961  |
| C  | 1.591485  | -0.454560 | 0.213207  |
| H  | 1.194948  | -1.067895 | 1.022577  |
| C  | 2.526893  | 0.628641  | 0.784487  |
| Cl | 3.443914  | 1.487957  | -0.519274 |
| C  | 3.557210  | 0.047311  | 1.765232  |
| H  | 3.062536  | -0.513580 | 2.566416  |
| H  | 4.146030  | 0.842079  | 2.238474  |
| H  | 4.264051  | -0.629350 | 1.274219  |
| Br | 2.551742  | -1.799428 | -0.868681 |

SCF Energy (SMD/wB97XD/6-31+G\*\*) =  
-6264.255881

SCF Energy (B3LYP/6-31G\*\*) =  
-6264.29175814

### 1e\_C010

#### MMFF Geometry

|   |           |           |           |
|---|-----------|-----------|-----------|
| C | -1.559880 | -0.352772 | -0.711996 |
| C | -2.836368 | 1.436426  | 0.641663  |
| C | -0.125625 | 0.159626  | -0.073472 |

|    |           |           |           |
|----|-----------|-----------|-----------|
| C  | -2.682277 | -0.052709 | 0.331203  |
| H  | -3.455336 | 1.944689  | -0.107818 |
| H  | -2.509346 | -0.617381 | 1.255206  |
| C  | -1.530206 | 2.149551  | 0.710133  |
| H  | -1.612742 | 3.185549  | 1.037167  |
| C  | -0.320654 | 1.641296  | 0.390808  |
| O  | -3.471702 | 1.613859  | 1.906611  |
| H  | -4.347501 | 1.193293  | 1.840047  |
| Br | -4.471720 | -0.718117 | -0.205208 |
| C  | -1.562792 | -1.876578 | -1.029463 |
| H  | -2.423402 | -2.154337 | -1.648769 |
| H  | -1.619419 | -2.488558 | -0.124334 |
| H  | -0.687016 | -2.197382 | -1.595564 |
| C  | -1.836864 | 0.377774  | -2.060434 |
| H  | -2.824731 | 0.129577  | -2.461436 |
| H  | -1.116279 | 0.085454  | -2.831336 |
| H  | -1.789155 | 1.466529  | -1.971686 |
| C  | 0.849619  | 2.577199  | 0.529222  |
| H  | 0.564693  | 3.536133  | 0.978820  |
| H  | 1.262729  | 2.816694  | -0.453012 |
| H  | 1.617044  | 2.162608  | 1.181678  |
| C  | 0.198834  | -0.659685 | 1.218648  |
| H  | -0.342644 | -0.245908 | 2.080407  |
| H  | -0.174226 | -1.682521 | 1.132611  |
| C  | 1.008909  | 0.006094  | -1.166454 |
| H  | 1.031074  | 0.904036  | -1.797883 |
| H  | 0.706023  | -0.781581 | -1.862058 |
| C  | 1.672971  | -0.758941 | 1.608844  |
| H  | 2.041681  | 0.217208  | 1.937791  |
| H  | 1.744604  | -1.410317 | 2.490722  |
| C  | 2.444207  | -0.413014 | -0.766253 |
| H  | 2.878254  | -0.950863 | -1.620401 |
| C  | 2.543760  | -1.314046 | 0.479108  |
| Cl | 4.237186  | -1.476294 | 1.103564  |
| C  | 2.124571  | -2.751738 | 0.111652  |
| H  | 1.129075  | -2.795026 | -0.334211 |
| H  | 2.116399  | -3.403024 | 0.993606  |
| H  | 2.814422  | -3.191219 | -0.619059 |
| Br | 3.626235  | 1.159590  | -0.731741 |

SCF Energy (SMD/wB97XD/6-31+G\*\*) =  
-6264.249437

SCF Energy (B3LYP/6-31G\*\*) =  
-6264.28673508

### 1e\_C011

#### MMFF Geometry

|   |           |            |            |
|---|-----------|------------|------------|
| C | 1.6128550 | -0.3383850 | 1.1741730  |
| C | 3.4074510 | -0.6425830 | -0.6893270 |

|    |            |            |            |
|----|------------|------------|------------|
| C  | 0.4494810  | -0.9631390 | 0.2145160  |
| C  | 2.8204830  | 0.2785400  | 0.3844940  |
| H  | 3.9171580  | -0.0632470 | -1.4677000 |
| H  | 3.6144970  | 0.5269220  | 1.1019980  |
| C  | 2.4049330  | -1.5358510 | -1.3402230 |
| H  | 2.7898380  | -2.0872360 | -2.1968950 |
| C  | 1.1153930  | -1.7010900 | -0.9845670 |
| O  | 4.4121560  | -1.4737130 | -0.1020690 |
| H  | 4.7271500  | -2.0834160 | -0.7902520 |
| Br | 2.4920390  | 2.0459650  | -0.4196610 |
| C  | 2.2350410  | -1.4757740 | 2.0591150  |
| H  | 3.1323050  | -1.1233030 | 2.5821070  |
| H  | 2.5183140  | -2.3535540 | 1.4707740  |
| H  | 1.5461770  | -1.8158790 | 2.8395940  |
| C  | 1.0709360  | 0.6975360  | 2.1935560  |
| H  | 1.8855590  | 1.0952950  | 2.8111920  |
| H  | 0.3453130  | 0.2533680  | 2.8819830  |
| H  | 0.5845220  | 1.5523920  | 1.7180200  |
| C  | 0.2923080  | -2.6536060 | -1.8233120 |
| H  | 0.0514740  | -3.5560450 | -1.2541760 |
| H  | 0.8278540  | -2.9844280 | -2.7208400 |
| H  | -0.6292410 | -2.1838170 | -2.1749640 |
| C  | -0.4235910 | -1.9624270 | 1.0675510  |
| H  | 0.0886740  | -2.9294590 | 1.1551830  |
| H  | -0.5261750 | -1.5871430 | 2.0920660  |
| C  | -0.5032220 | 0.1313300  | -0.3795840 |
| H  | -0.7684510 | -0.0973880 | -1.4194110 |
| H  | 0.0051520  | 1.0901310  | -0.4487420 |
| C  | -1.8572710 | -2.2216200 | 0.5829870  |
| H  | -1.8259960 | -2.8217550 | -0.3295480 |
| H  | -2.3418970 | -2.8806440 | 1.3161720  |
| C  | -1.7962910 | 0.3113350  | 0.4214900  |
| H  | -1.5530760 | 0.5504830  | 1.4616150  |
| C  | -2.7014190 | -0.9381670 | 0.3821890  |
| Cl | -3.5548510 | -1.1172790 | -1.2086690 |
| C  | -3.7871620 | -0.8592630 | 1.4685550  |
| H  | -3.3370060 | -0.7752390 | 2.4643390  |
| H  | -4.4180850 | -1.7560930 | 1.4690990  |
| H  | -4.4490900 | 0.0018610  | 1.3296820  |
| Br | -2.6945900 | 1.9554820  | -0.1779690 |

SCF Energy (SMD/wB97XD/6-31+G\*\*) =  
-6264.249742

SCF Energy (B3LYP/6-31G\*\*) =  
-6264.28589068

1e\_C012

MMFF Geometry

|   |           |           |          |
|---|-----------|-----------|----------|
| C | -1.714507 | -0.761519 | 1.119792 |
|---|-----------|-----------|----------|

|    |           |           |           |
|----|-----------|-----------|-----------|
| C  | -2.523789 | 1.486963  | -0.010331 |
| C  | -0.213341 | -0.167523 | 0.914070  |
| C  | -2.765473 | -0.021543 | 0.215074  |
| H  | -2.367879 | 1.741158  | -1.065079 |
| H  | -3.765228 | -0.171492 | 0.644344  |
| C  | -1.375888 | 2.059954  | 0.752672  |
| H  | -1.446006 | 3.126937  | 0.958590  |
| C  | -0.322203 | 1.353212  | 1.211594  |
| O  | -3.688156 | 2.208590  | 0.404365  |
| H  | -4.386781 | 2.012407  | -0.243909 |
| Br | -3.036981 | -0.853311 | -1.566726 |
| C  | -2.183899 | -0.528463 | 2.599444  |
| H  | -3.190678 | -0.936439 | 2.754452  |
| H  | -2.229603 | 0.528834  | 2.874749  |
| H  | -1.529442 | -1.031649 | 3.318292  |
| C  | -1.811835 | -2.304692 | 0.949907  |
| H  | -2.859423 | -2.630326 | 0.970146  |
| H  | -1.318789 | -2.840437 | 1.767856  |
| H  | -1.373033 | -2.670723 | 0.019821  |
| C  | 0.663293  | 2.072574  | 2.100113  |
| H  | 1.655756  | 2.125408  | 1.655330  |
| H  | 0.732867  | 1.592843  | 3.080213  |
| H  | 0.359841  | 3.108857  | 2.291297  |
| C  | 0.785047  | -0.904117 | 1.867272  |
| H  | 0.629261  | -0.596723 | 2.907545  |
| H  | 0.579572  | -1.977800 | 1.862654  |
| C  | 0.252038  | -0.376236 | -0.576616 |
| H  | -0.271554 | 0.319014  | -1.243164 |
| H  | -0.064776 | -1.370875 | -0.902405 |
| C  | 2.278078  | -0.757295 | 1.544285  |
| H  | 2.617938  | 0.255677  | 1.772324  |
| H  | 2.837794  | -1.406144 | 2.232073  |
| C  | 1.755932  | -0.314379 | -0.892525 |
| H  | 1.905806  | -0.707444 | -1.906641 |
| C  | 2.620100  | -1.120031 | 0.094267  |
| Cl | 4.389916  | -0.840615 | -0.162696 |
| C  | 2.413007  | -2.630956 | -0.143846 |
| H  | 3.006810  | -3.229574 | 0.557173  |
| H  | 1.369645  | -2.936395 | -0.023313 |
| H  | 2.713262  | -2.915781 | -1.159379 |
| Br | 2.297894  | 1.559503  | -1.120791 |

SCF Energy (SMD/wB97XD/6-31+G\*\*) =  
-6264.253967

SCF Energy (B3LYP/6-31G\*\*) =  
-6264.28758627

1e\_C013

MMFF Geometry

|    |           |           |           |
|----|-----------|-----------|-----------|
| C  | -1.572366 | -0.348200 | -0.712068 |
| C  | -2.833926 | 1.433200  | 0.679062  |
| C  | -0.135272 | 0.161295  | -0.079158 |
| C  | -2.695099 | -0.052895 | 0.335752  |
| H  | -3.489195 | 1.944876  | -0.035460 |
| H  | -2.526370 | -0.637280 | 1.248242  |
| C  | -1.529197 | 2.156597  | 0.703047  |
| H  | -1.612659 | 3.202401  | 0.999258  |
| C  | -0.323991 | 1.647046  | 0.372758  |
| O  | -3.421812 | 1.591029  | 1.970728  |
| H  | -2.762332 | 1.317687  | 2.630936  |
| Br | -4.482056 | -0.707720 | -0.221399 |
| C  | -1.575435 | -1.872520 | -1.031612 |
| H  | -2.438578 | -2.150902 | -1.646973 |
| H  | -1.626727 | -2.485076 | -0.126525 |
| H  | -0.702874 | -2.193765 | -1.602182 |
| C  | -1.853200 | 0.385147  | -2.058142 |
| H  | -2.833225 | 0.121588  | -2.468377 |
| H  | -1.122286 | 0.110359  | -2.825655 |
| H  | -1.826981 | 1.474001  | -1.962614 |
| C  | 0.845843  | 2.588838  | 0.471496  |
| H  | 0.564490  | 3.557722  | 0.901602  |
| H  | 1.246732  | 2.805647  | -0.520983 |
| H  | 1.621097  | 2.190314  | 1.125164  |
| C  | 0.186107  | -0.648796 | 1.218578  |
| H  | -0.355990 | -0.228591 | 2.076837  |
| H  | -0.187479 | -1.672063 | 1.139250  |
| C  | 0.998868  | -0.005790 | -1.171936 |
| H  | 1.024124  | 0.886125  | -1.811589 |
| H  | 0.693320  | -0.797253 | -1.861644 |
| C  | 1.660042  | -0.743621 | 1.609461  |
| H  | 2.028760  | 0.237485  | 1.924168  |
| H  | 1.731853  | -1.383080 | 2.499960  |
| C  | 2.433129  | -0.426828 | -0.768941 |
| H  | 2.864454  | -0.975329 | -1.617647 |
| C  | 2.529679  | -1.314542 | 0.486228  |
| Cl | 4.221501  | -1.474417 | 1.114653  |
| C  | 2.106126  | -2.754731 | 0.133857  |
| H  | 1.111867  | -2.799242 | -0.315020 |
| H  | 2.092736  | -3.395866 | 1.023137  |
| H  | 2.796611  | -3.205046 | -0.589628 |
| Br | 3.621192  | 1.141632  | -0.750872 |

SCF Energy (SMD/wB97XD/6-31+G\*\*) =  
-6264.247660

SCF Energy (B3LYP/6-31G\*\*) =  
-6264.28191406

### MMFF Geometry

|    |           |           |           |
|----|-----------|-----------|-----------|
| C  | -1.567226 | -0.362675 | -0.706879 |
| C  | -2.832032 | 1.415895  | 0.687335  |
| C  | -0.132690 | 0.155796  | -0.078781 |
| C  | -2.688579 | -0.068633 | 0.342252  |
| H  | -3.503862 | 1.922172  | -0.016491 |
| H  | -2.522598 | -0.655929 | 1.253474  |
| C  | -1.531641 | 2.148850  | 0.698304  |
| H  | -1.606714 | 3.194139  | 0.993761  |
| C  | -0.326065 | 1.644944  | 0.358910  |
| O  | -3.399120 | 1.541316  | 1.991403  |
| H  | -3.617779 | 2.478659  | 2.124619  |
| Br | -4.478772 | -0.719184 | -0.223890 |
| C  | -1.564926 | -1.888728 | -1.018678 |
| H  | -2.429846 | -2.174242 | -1.628192 |
| H  | -1.609095 | -2.496848 | -0.110244 |
| H  | -0.693880 | -2.209480 | -1.591831 |
| C  | -1.852858 | 0.363413  | -2.055877 |
| H  | -2.827764 | 0.086274  | -2.469269 |
| H  | -1.115971 | 0.095915  | -2.820205 |
| H  | -1.841254 | 1.452759  | -1.963091 |
| C  | 0.841342  | 2.590696  | 0.446229  |
| H  | 0.558685  | 3.563025  | 0.867544  |
| H  | 1.239464  | 2.799292  | -0.549143 |
| H  | 1.619198  | 2.200418  | 1.101749  |
| C  | 0.190807  | -0.641466 | 1.226569  |
| H  | -0.353202 | -0.215618 | 2.080797  |
| H  | -0.179306 | -1.666684 | 1.156105  |
| C  | 1.002372  | -0.017544 | -1.169485 |
| H  | 1.025794  | 0.868905  | -1.816737 |
| H  | 0.699533  | -0.815263 | -1.853037 |
| C  | 1.664760  | -0.727300 | 1.619322  |
| H  | 2.030144  | 0.258087  | 1.924369  |
| H  | 1.738365  | -1.357744 | 2.516065  |
| C  | 2.437218  | -0.431421 | -0.761856 |
| H  | 2.869658  | -0.987654 | -1.604976 |
| C  | 2.536080  | -1.306412 | 0.501970  |
| Cl | 4.228963  | -1.455501 | 1.131028  |
| C  | 2.116604  | -2.751155 | 0.163210  |
| H  | 1.122919  | -2.802594 | -0.286375 |
| H  | 2.104026  | -3.383610 | 1.058688  |
| H  | 2.808978  | -3.206708 | -0.555182 |
| Br | 3.622375  | 1.139760  | -0.761436 |

SCF Energy (SMD/wB97XD/6-31+G\*\*) =  
-6264.246776

SCF Energy (B3LYP/6-31G\*\*) =  
-6264.28087953

## 1e\_C015

## MMFF Geometry

|    |           |           |           |
|----|-----------|-----------|-----------|
| C  | 1.609008  | -0.374314 | 1.159250  |
| C  | 3.370348  | -0.657672 | -0.746220 |
| C  | 0.432597  | -0.989123 | 0.210405  |
| C  | 2.810671  | 0.241591  | 0.360923  |
| H  | 3.822989  | -0.070393 | -1.553847 |
| H  | 3.619480  | 0.461151  | 1.071283  |
| C  | 2.368888  | -1.575913 | -1.354993 |
| H  | 2.761590  | -2.154268 | -2.190586 |
| C  | 1.085595  | -1.745591 | -0.981054 |
| O  | 4.414121  | -1.487421 | -0.230540 |
| H  | 5.183524  | -0.914511 | -0.071661 |
| Br | 2.505559  | 2.037436  | -0.385686 |
| C  | 2.238186  | -1.520668 | 2.027648  |
| H  | 3.133563  | -1.170236 | 2.555295  |
| H  | 2.528372  | -2.387592 | 1.426744  |
| H  | 1.551381  | -1.875980 | 2.803049  |
| C  | 1.082671  | 0.656794  | 2.191488  |
| H  | 1.906503  | 1.052108  | 2.798407  |
| H  | 0.367642  | 0.211024  | 2.889709  |
| H  | 0.589036  | 1.512952  | 1.725712  |
| C  | 0.262709  | -2.724002 | -1.788303 |
| H  | 0.797748  | -3.083481 | -2.675047 |
| H  | -0.657584 | -2.261948 | -2.154115 |
| H  | 0.019585  | -3.607985 | -1.191914 |
| C  | -0.452486 | -1.967236 | 1.075805  |
| H  | 0.044435  | -2.941652 | 1.169692  |
| H  | -0.544866 | -1.583520 | 2.097948  |
| C  | -0.504036 | 0.111307  | -0.394792 |
| H  | -0.781112 | -0.132080 | -1.428516 |
| H  | 0.021837  | 1.059078  | -0.484235 |
| C  | -1.891861 | -2.205915 | 0.597099  |
| H  | -1.872554 | -2.809600 | -0.313449 |
| H  | -2.385076 | -2.854078 | 1.334178  |
| C  | -1.788326 | 0.324243  | 0.411897  |
| H  | -1.534490 | 0.570113  | 1.447838  |
| C  | -2.715575 | -0.909627 | 0.392959  |
| Cl | -3.588579 | -1.088091 | -1.187058 |
| C  | -3.788226 | -0.801331 | 1.489738  |
| H  | -3.326252 | -0.717433 | 2.480106  |
| H  | -4.435774 | -1.686100 | 1.504498  |
| H  | -4.435206 | 0.070989  | 1.350188  |
| Br | -2.659927 | 1.977852  | -0.199402 |

SCF Energy (SMD/wB97XD/6-31+G\*\*) =  
-6264.251707

SCF Energy (B3LYP/6-31G\*\*) =  
-6264.28760761

## 1e\_C016

## MMFF Geometry

|    |           |           |           |
|----|-----------|-----------|-----------|
| C  | -1.553284 | -0.450445 | -0.649644 |
| C  | -2.817100 | 1.520402  | 0.439252  |
| C  | -0.130636 | 0.080967  | -0.019747 |
| C  | -2.709781 | 0.000191  | 0.301442  |
| H  | -3.348237 | 1.969884  | -0.408395 |
| H  | -2.611316 | -0.457254 | 1.291481  |
| C  | -1.483716 | 2.177175  | 0.550790  |
| H  | -1.527502 | 3.233682  | 0.812333  |
| C  | -0.287216 | 1.587421  | 0.351502  |
| O  | -3.543227 | 1.858519  | 1.620448  |
| H  | -4.423836 | 1.452403  | 1.531887  |
| Br | -4.496188 | -0.665982 | -0.245664 |
| C  | -1.563312 | -1.997866 | -0.783920 |
| H  | -2.416788 | -2.346576 | -1.375516 |
| H  | -1.625031 | -2.491816 | 0.190821  |
| H  | -0.674178 | -2.379348 | -1.292424 |
| C  | -1.773174 | 0.134856  | -2.078830 |
| H  | -2.768761 | -0.099541 | -2.467772 |
| H  | -1.069175 | -0.282523 | -2.805568 |
| H  | -1.660595 | 1.222451  | -2.108163 |
| C  | 0.943883  | 2.442684  | 0.532490  |
| H  | 0.701545  | 3.436692  | 0.926243  |
| H  | 1.451210  | 2.602713  | -0.421318 |
| H  | 1.633895  | 1.993177  | 1.244553  |
| C  | 0.193305  | -0.676434 | 1.309875  |
| H  | 0.504934  | 0.029187  | 2.089980  |
| H  | -0.702354 | -1.139130 | 1.734049  |
| C  | 1.009681  | -0.104556 | -1.087998 |
| H  | 1.065069  | 0.782602  | -1.732146 |
| H  | 0.683364  | -0.885138 | -1.783954 |
| C  | 1.253198  | -1.772916 | 1.195920  |
| H  | 1.366523  | -2.253282 | 2.177075  |
| H  | 0.899665  | -2.559808 | 0.519059  |
| C  | 2.416318  | -0.589014 | -0.678024 |
| H  | 2.662261  | -1.362272 | -1.420963 |
| C  | 2.605496  | -1.235243 | 0.710150  |
| Cl | 3.253366  | -0.114364 | 1.971796  |
| C  | 3.608716  | -2.400293 | 0.625331  |
| H  | 3.267879  | -3.164958 | -0.082328 |
| H  | 3.734558  | -2.893295 | 1.596599  |
| H  | 4.595997  | -2.059216 | 0.294206  |
| Br | 3.782623  | 0.735292  | -1.163061 |

SCF Energy (SMD/wB97XD/6-31+G\*\*) =  
-6264.248933

SCF Energy (B3LYP/6-31G\*\*) =  
-6264.28664050

## 1e\_C017

## MMFF Geometry

|    |          |          |          |
|----|----------|----------|----------|
| C  | -1.73340 | -0.74462 | 1.12265  |
| C  | -2.61964 | 1.45854  | -0.02413 |
| C  | -0.23887 | -0.13327 | 0.91004  |
| C  | -2.78809 | -0.06201 | 0.18018  |
| H  | -2.57184 | 1.73101  | -1.08433 |
| H  | -3.79276 | -0.26799 | 0.57371  |
| C  | -1.44216 | 2.07079  | 0.66651  |
| H  | -1.50414 | 3.14546  | 0.82746  |
| C  | -0.36978 | 1.39857  | 1.13432  |
| O  | -3.78799 | 2.10048  | 0.50123  |
| H  | -3.77118 | 3.02298  | 0.19456  |
| Br | -2.95036 | -0.91006 | -1.60764 |
| C  | -2.22159 | -0.46718 | 2.58797  |
| H  | -3.22935 | -0.87250 | 2.74316  |
| H  | -2.27125 | 0.59766  | 2.83118  |
| H  | -1.57496 | -0.94687 | 3.32975  |
| C  | -1.80587 | -2.29436 | 1.00343  |
| H  | -2.84912 | -2.63392 | 1.02088  |
| H  | -1.31554 | -2.79550 | 1.84451  |
| H  | -1.35143 | -2.68557 | 0.09144  |
| C  | 0.62316  | 2.17359  | 1.96791  |
| H  | 0.31557  | 3.21706  | 2.10598  |
| H  | 1.60974  | 2.20864  | 1.50990  |
| H  | 0.70829  | 1.74952  | 2.97224  |
| C  | 0.75433  | -0.81024 | 1.91202  |
| H  | 0.58182  | -0.45008 | 2.93273  |
| H  | 0.55787  | -1.88446 | 1.96144  |
| C  | 0.25399  | -0.39579 | -0.56259 |
| H  | -0.26034 | 0.27557  | -1.26060 |
| H  | -0.05399 | -1.40286 | -0.85615 |
| C  | 2.25043  | -0.66784 | 1.60185  |
| H  | 2.58078  | 0.35728  | 1.78520  |
| H  | 2.80497  | -1.27836 | 2.32791  |
| C  | 1.76177  | -0.34585 | -0.86054 |
| H  | 1.92560  | -0.79033 | -1.85109 |
| C  | 2.61507  | -1.09807 | 0.17621  |
| Cl | 4.38721  | -0.82176 | -0.06784 |
| C  | 2.41805  | -2.61971 | 0.00830  |
| H  | 1.37396  | -2.92361 | 0.12650  |
| H  | 3.00267  | -3.18087 | 0.74699  |
| H  | 2.73597  | -2.95195 | -0.98726 |
| Br | 2.30253  | 1.51436  | -1.18343 |

SCF Energy (SMD/wB97XD/6-31+G\*\*) =  
-6264.251811

SCF Energy (B3LYP/6-31G\*\*) =  
-6264.28520980

## 1e\_C018

## MMFF Geometry

|    |           |           |           |
|----|-----------|-----------|-----------|
| C  | -1.747164 | -0.707854 | 1.119320  |
| C  | -2.671105 | 1.457529  | -0.060625 |
| C  | -0.254423 | -0.089676 | 0.901081  |
| C  | -2.801954 | -0.065301 | 0.148655  |
| H  | -2.674903 | 1.731928  | -1.120603 |
| H  | -3.807071 | -0.291110 | 0.530071  |
| C  | -1.477529 | 2.096046  | 0.574846  |
| H  | -1.542747 | 3.180070  | 0.666894  |
| C  | -0.397445 | 1.450111  | 1.060178  |
| O  | -3.824177 | 2.094923  | 0.505974  |
| H  | -3.731320 | 2.066185  | 1.473580  |
| Br | -2.915214 | -0.937109 | -1.626594 |
| C  | -2.245269 | -0.394000 | 2.573722  |
| H  | -3.261094 | -0.779056 | 2.727011  |
| H  | -2.275881 | 0.675479  | 2.797790  |
| H  | -1.613761 | -0.870557 | 3.330688  |
| C  | -1.808144 | -2.261219 | 1.041993  |
| H  | -2.849222 | -2.606866 | 1.069764  |
| H  | -1.313137 | -2.736923 | 1.894820  |
| H  | -1.353791 | -2.674652 | 0.139969  |
| C  | 0.604609  | 2.271382  | 1.836992  |
| H  | 0.699354  | 1.904682  | 2.862947  |
| H  | 0.298299  | 3.321178  | 1.918520  |
| H  | 1.586938  | 2.279757  | 1.369898  |
| C  | 0.728412  | -0.713830 | 1.946481  |
| H  | 0.544079  | -0.301153 | 2.945262  |
| H  | 0.531516  | -1.784053 | 2.049853  |
| C  | 0.260558  | -0.406069 | -0.553410 |
| H  | -0.240101 | 0.244112  | -1.281007 |
| H  | -0.048948 | -1.420781 | -0.816566 |
| C  | 2.227784  | -0.586689 | 1.646718  |
| H  | 2.556774  | 0.446149  | 1.783818  |
| H  | 2.773462  | -1.161242 | 2.408016  |
| C  | 1.772475  | -0.379463 | -0.833729 |
| H  | 1.945298  | -0.872842 | -1.799352 |
| C  | 2.608367  | -1.086055 | 0.248103  |
| Cl | 4.385021  | -0.830873 | 0.015575  |
| C  | 2.404561  | -2.612838 | 0.149515  |
| H  | 2.735315  | -2.993713 | -0.824205 |
| H  | 1.356895  | -2.904951 | 0.265744  |
| H  | 2.974499  | -3.141479 | 0.922847  |
| Br | 2.330506  | 1.457761  | -1.242759 |

SCF Energy (SMD/wB97XD/6-31+G\*\*) =  
-6264.252714

SCF Energy (B3LYP/6-31G\*\*) =  
-6264.28673196

## 1f\_C001

## MMFF Geometry

|    |           |           |           |
|----|-----------|-----------|-----------|
| C  | 1.595495  | 0.606692  | -0.795182 |
| C  | 2.761672  | 0.321102  | 1.493968  |
| C  | 0.169469  | 0.897281  | -0.035792 |
| C  | 2.451713  | -0.309174 | 0.134648  |
| H  | 3.630756  | 0.988190  | 1.439486  |
| H  | 1.963202  | -1.281189 | 0.271690  |
| C  | 1.622968  | 1.109188  | 2.047166  |
| H  | 1.797357  | 1.485499  | 3.054587  |
| C  | 0.471955  | 1.407561  | 1.408921  |
| O  | 3.065084  | -0.691904 | 2.451131  |
| H  | 3.838869  | -1.175533 | 2.110755  |
| Br | 4.183554  | -0.854291 | -0.661897 |
| C  | 2.323929  | 1.948983  | -1.094732 |
| H  | 3.320238  | 1.787598  | -1.518226 |
| H  | 2.448451  | 2.571219  | -0.204119 |
| H  | 1.774603  | 2.542430  | -1.833645 |
| C  | 1.404339  | -0.106595 | -2.165367 |
| H  | 2.317079  | -0.062025 | -2.770680 |
| H  | 0.622140  | 0.346885  | -2.776980 |
| H  | 1.160610  | -1.167178 | -2.046068 |
| C  | -0.504235 | 2.287695  | 2.151992  |
| H  | -0.146500 | 2.547173  | 3.155547  |
| H  | -1.466448 | 1.795263  | 2.294094  |
| H  | -0.648767 | 3.236320  | 1.627294  |
| C  | -0.655177 | 1.946327  | -0.857123 |
| H  | -0.247425 | 2.952644  | -0.695186 |
| H  | -0.537384 | 1.765675  | -1.928660 |
| C  | -0.640330 | -0.438398 | 0.090510  |
| H  | -0.196389 | -1.068811 | 0.873121  |
| H  | -0.543862 | -1.020706 | -0.829907 |
| C  | -2.167948 | 2.003104  | -0.603514 |
| H  | -2.364237 | 2.502158  | 0.349995  |
| H  | -2.616323 | 2.661428  | -1.360586 |
| C  | -2.138063 | -0.290193 | 0.379400  |
| H  | -2.287092 | 0.063264  | 1.403293  |
| C  | -2.857783 | 0.627683  | -0.625680 |
| Cl | -4.571601 | 0.897846  | -0.102875 |
| C  | -2.901684 | 0.087594  | -2.065425 |
| H  | -1.903780 | -0.136572 | -2.453090 |
| H  | -3.351980 | 0.820654  | -2.745712 |
| H  | -3.498254 | -0.826783 | -2.147377 |
| Br | -2.911732 | -2.107105 | 0.435824  |

SCF Energy (SMD/wB97XD/6-31+G\*\*) =  
-6264.265515

SCF Energy (B3LYP/6-31G\*\*) =  
-6264.30146369

## 1f\_C002

## MMFF Geometry

|    |           |           |           |
|----|-----------|-----------|-----------|
| C  | 1.613611  | 0.645091  | -0.760025 |
| C  | 2.735349  | 0.199715  | 1.533813  |
| C  | 0.180344  | 0.899077  | -0.002295 |
| C  | 2.459331  | -0.330034 | 0.122264  |
| H  | 3.630536  | 0.832464  | 1.547622  |
| H  | 1.972213  | -1.310840 | 0.177326  |
| C  | 1.608243  | 0.996338  | 2.104130  |
| H  | 1.785965  | 1.342440  | 3.122416  |
| C  | 0.470655  | 1.341143  | 1.466637  |
| O  | 2.976913  | -0.881536 | 2.433966  |
| H  | 2.139771  | -1.361730 | 2.552707  |
| Br | 4.201671  | -0.810166 | -0.692828 |
| C  | 2.350110  | 1.999387  | -0.973761 |
| H  | 3.343820  | 1.860541  | -1.410998 |
| H  | 2.482418  | 2.560779  | -0.044735 |
| H  | 1.802810  | 2.643282  | -1.670619 |
| C  | 1.433268  | 0.012487  | -2.171513 |
| H  | 2.354440  | 0.080044  | -2.761607 |
| H  | 0.665829  | 0.508611  | -2.768217 |
| H  | 1.175481  | -1.049947 | -2.115490 |
| C  | -0.495492 | 2.215523  | 2.230028  |
| H  | -0.619815 | 3.183070  | 1.735724  |
| H  | -0.141260 | 2.435668  | 3.244163  |
| H  | -1.466966 | 1.734539  | 2.348703  |
| C  | -0.640236 | 1.983525  | -0.782011 |
| H  | -0.232873 | 2.981768  | -0.575840 |
| H  | -0.518357 | 1.849323  | -1.859604 |
| C  | -0.629320 | -0.440071 | 0.055918  |
| H  | -0.186944 | -1.108982 | 0.806839  |
| H  | -0.532354 | -0.975961 | -0.892377 |
| C  | -2.154632 | 2.030726  | -0.534238 |
| H  | -2.355346 | 2.491791  | 0.437294  |
| H  | -2.599031 | 2.719081  | -1.266548 |
| C  | -2.126566 | -0.301234 | 0.351800  |
| H  | -2.272907 | 0.012640  | 1.389156  |
| C  | -2.845235 | 0.657716  | -0.614776 |
| Cl | -4.558835 | 0.905668  | -0.081625 |
| C  | -2.887772 | 0.178113  | -2.075674 |
| H  | -3.480472 | -0.734614 | -2.195298 |
| H  | -1.889097 | -0.025162 | -2.472940 |
| H  | -3.341534 | 0.937094  | -2.724505 |
| Br | -2.900568 | -2.117690 | 0.338855  |

SCF Energy (SMD/wB97XD/6-31+G\*\*) =  
-6264.26381

SCF Energy (B3LYP/6-31G\*\*) =  
-6264.29665693

## 1f\_C003

## MMFF Geometry

|    |           |           |           |
|----|-----------|-----------|-----------|
| C  | 1.608399  | 0.640803  | -0.767332 |
| C  | 2.724542  | 0.175205  | 1.526965  |
| C  | 0.177623  | 0.896205  | -0.007853 |
| C  | 2.449774  | -0.341060 | 0.110869  |
| H  | 3.633801  | 0.788250  | 1.551768  |
| H  | 1.965524  | -1.323983 | 0.154436  |
| C  | 1.605829  | 0.984344  | 2.098206  |
| H  | 1.773339  | 1.328283  | 3.117574  |
| C  | 0.472662  | 1.341863  | 1.458937  |
| O  | 2.928838  | -0.935552 | 2.399494  |
| H  | 3.268801  | -0.587350 | 3.240495  |
| Br | 4.201289  | -0.806637 | -0.703058 |
| C  | 2.348789  | 1.993676  | -0.976917 |
| H  | 3.338375  | 1.854540  | -1.423246 |
| H  | 2.490963  | 2.547638  | -0.044908 |
| H  | 1.798902  | 2.644761  | -1.664949 |
| C  | 1.425986  | 0.012949  | -2.180737 |
| H  | 2.348978  | 0.074304  | -2.768614 |
| H  | 0.664338  | 0.516732  | -2.778371 |
| H  | 1.159583  | -1.047479 | -2.128059 |
| C  | -0.489706 | 2.220986  | 2.221222  |
| H  | -0.133419 | 2.443366  | 3.234129  |
| H  | -1.462307 | 1.742922  | 2.342768  |
| H  | -0.611993 | 3.187557  | 1.724510  |
| C  | -0.644420 | 1.979718  | -0.787268 |
| H  | -0.235774 | 2.978149  | -0.584691 |
| H  | -0.526497 | 1.843256  | -1.864923 |
| C  | -0.632818 | -0.442908 | 0.054677  |
| H  | -0.188740 | -1.111295 | 0.804992  |
| H  | -0.539031 | -0.979845 | -0.893370 |
| C  | -2.157767 | 2.028547  | -0.534599 |
| H  | -2.355314 | 2.491980  | 0.436407  |
| H  | -2.603981 | 2.715674  | -1.266984 |
| C  | -2.128742 | -0.302714 | 0.355612  |
| H  | -2.271392 | 0.012660  | 1.393071  |
| C  | -2.849410 | 0.655873  | -0.610158 |
| Cl | -4.561656 | 0.907676  | -0.072771 |
| C  | -2.897048 | 0.174270  | -2.070409 |
| H  | -1.899853 | -0.031116 | -2.470356 |
| H  | -3.351501 | 0.933084  | -2.718963 |
| H  | -3.491631 | -0.737590 | -2.187167 |
| Br | -2.908029 | -2.117280 | 0.345581  |

SCF Energy (SMD/wB97XD/6-31+G\*\*) =  
-6264.26274

SCF Energy (B3LYP/6-31G\*\*) =  
-6264.29535543

## 1f\_C004

## MMFF Geometry

|    |          |          |          |
|----|----------|----------|----------|
| C  | 1.56564  | -0.60912 | -0.98734 |
| C  | 3.30949  | -1.02243 | 0.90570  |
| C  | 0.40421  | -0.34064 | 0.12843  |
| C  | 3.00856  | -0.34883 | -0.43928 |
| H  | 4.01553  | -0.43205 | 1.50032  |
| H  | 3.73375  | -0.70645 | -1.18310 |
| C  | 2.10996  | -1.32289 | 1.74643  |
| H  | 2.33982  | -1.82026 | 2.68760  |
| C  | 0.82051  | -1.06291 | 1.44531  |
| O  | 3.96122  | -2.27143 | 0.64711  |
| H  | 4.19124  | -2.66515 | 1.50537  |
| Br | 3.51904  | 1.55439  | -0.33076 |
| C  | 1.36355  | 0.17506  | -2.31661 |
| H  | 2.19279  | -0.02502 | -3.00706 |
| H  | 1.31826  | 1.25762  | -2.18737 |
| H  | 0.45162  | -0.12251 | -2.84222 |
| C  | 1.53210  | -2.11465 | -1.42696 |
| H  | 2.38494  | -2.35276 | -2.07424 |
| H  | 0.63191  | -2.34995 | -2.00506 |
| H  | 1.56388  | -2.80553 | -0.57990 |
| C  | -0.21718 | -1.53239 | 2.43694  |
| H  | 0.23408  | -2.01429 | 3.31238  |
| H  | -0.87525 | -2.28009 | 1.98525  |
| H  | -0.81158 | -0.70376 | 2.82251  |
| C  | 0.26880  | 1.18236  | 0.45413  |
| H  | 1.07306  | 1.49751  | 1.12869  |
| H  | 0.38499  | 1.77968  | -0.45244 |
| C  | -0.96305 | -0.87744 | -0.43098 |
| H  | -0.97645 | -1.97443 | -0.37326 |
| H  | -1.02916 | -0.64918 | -1.49893 |
| C  | -1.04099 | 1.64025  | 1.10176  |
| H  | -1.07828 | 1.28033  | 2.13537  |
| H  | -1.02042 | 2.73604  | 1.17989  |
| C  | -2.24838 | -0.34090 | 0.21781  |
| H  | -2.39174 | -0.78920 | 1.20390  |
| C  | -2.29062 | 1.19128  | 0.32757  |
| Cl | -3.72365 | 1.70348  | 1.31027  |
| C  | -2.37554 | 1.92410  | -1.02170 |
| H  | -1.57952 | 1.61965  | -1.70786 |
| H  | -2.28691 | 3.00860  | -0.88508 |
| H  | -3.32911 | 1.74649  | -1.52989 |
| Br | -3.77639 | -1.07633 | -0.79591 |

SCF Energy (SMD/wB97XD/6-31+G\*\*) =  
-6264.258190

SCF Energy (B3LYP/6-31G\*\*) =  
-6264.29237052

## 1f\_C005

## MMFF Geometry

|    |           |           |           |
|----|-----------|-----------|-----------|
| C  | 1.566743  | -0.628378 | -0.973567 |
| C  | 3.277608  | -0.965678 | 0.976346  |
| C  | 0.389875  | -0.376562 | 0.125946  |
| C  | 2.997861  | -0.351042 | -0.403263 |
| H  | 3.880897  | -0.305473 | 1.609852  |
| H  | 3.736487  | -0.736636 | -1.119241 |
| C  | 2.067939  | -1.361577 | 1.755797  |
| H  | 2.298504  | -1.903991 | 2.672335  |
| C  | 0.779403  | -1.142372 | 1.422497  |
| O  | 4.043490  | -2.164490 | 0.813071  |
| H  | 4.939314  | -1.897284 | 0.544529  |
| Br | 3.517220  | 1.553585  | -0.367379 |
| C  | 1.367945  | 0.152810  | -2.304904 |
| H  | 2.230008  | 0.004682  | -2.967626 |
| H  | 1.252882  | 1.229474  | -2.169212 |
| H  | 0.494464  | -0.194077 | -2.865125 |
| C  | 1.562284  | -2.133767 | -1.414506 |
| H  | 2.407040  | -2.347847 | -2.080712 |
| H  | 0.656230  | -2.391629 | -1.973110 |
| H  | 1.634264  | -2.825623 | -0.570825 |
| C  | -0.270845 | -1.701714 | 2.350602  |
| H  | 0.169983  | -2.233414 | 3.202192  |
| H  | -0.901780 | -2.429436 | 1.832553  |
| H  | -0.891756 | -0.911799 | 2.775505  |
| C  | 0.273716  | 1.136200  | 0.498393  |
| H  | 1.088985  | 1.425351  | 1.171715  |
| H  | 0.383848  | 1.759691  | -0.391514 |
| C  | -0.977339 | -0.867500 | -0.472222 |
| H  | -1.005325 | -1.965404 | -0.472819 |
| H  | -1.031629 | -0.581193 | -1.526640 |
| C  | -1.027015 | 1.572846  | 1.178048  |
| H  | -1.062396 | 1.155963  | 2.190551  |
| H  | -0.995103 | 2.662552  | 1.314220  |
| C  | -2.260929 | -0.348003 | 0.194935  |
| H  | -2.418362 | -0.846688 | 1.154142  |
| C  | -2.284427 | 1.177179  | 0.386064  |
| Cl | -3.709227 | 1.652602  | 1.398504  |
| C  | -2.365596 | 1.980840  | -0.922834 |
| H  | -1.580132 | 1.698304  | -1.630283 |
| H  | -2.256918 | 3.055061  | -0.730768 |
| H  | -3.325703 | 1.846878  | -1.432160 |
| Br | -3.790883 | -1.008027 | -0.866926 |

SCF Energy (SMD/wB97XD/6-31+G\*\*) =  
-6264.259879

SCF Energy (B3LYP/6-31G\*\*) =  
-6264.29380652

## 1f\_C006

## MMFF Geometry

|    |           |           |           |
|----|-----------|-----------|-----------|
| C  | 1.572771  | -0.618945 | -0.975927 |
| C  | 3.293333  | -0.981691 | 0.961321  |
| C  | 0.399890  | -0.364155 | 0.128871  |
| C  | 3.009867  | -0.350919 | -0.410506 |
| H  | 3.924127  | -0.332930 | 1.578294  |
| H  | 3.745858  | -0.729255 | -1.132906 |
| C  | 2.084548  | -1.347330 | 1.760573  |
| H  | 2.317803  | -1.857246 | 2.695602  |
| C  | 0.796310  | -1.120470 | 1.431731  |
| O  | 4.054249  | -2.181986 | 0.778023  |
| H  | 3.435212  | -2.904772 | 0.580526  |
| Br | 3.520993  | 1.557062  | -0.353945 |
| C  | 1.375890  | 0.168956  | -2.304368 |
| H  | 2.227408  | 0.002521  | -2.976356 |
| H  | 1.286707  | 1.247844  | -2.167444 |
| H  | 0.488299  | -0.156246 | -2.855147 |
| C  | 1.549367  | -2.121554 | -1.424365 |
| H  | 2.413761  | -2.355631 | -2.057426 |
| H  | 0.659062  | -2.353749 | -2.019095 |
| H  | 1.563283  | -2.818086 | -0.582234 |
| C  | -0.252713 | -1.644724 | 2.382483  |
| H  | 0.189567  | -2.160517 | 3.243072  |
| H  | -0.894734 | -2.378407 | 1.886868  |
| H  | -0.862503 | -0.839176 | 2.793116  |
| C  | 0.278003  | 1.151512  | 0.489420  |
| H  | 1.088806  | 1.446712  | 1.165434  |
| H  | 0.392468  | 1.768236  | -0.404493 |
| C  | -0.967055 | -0.868062 | -0.459365 |
| H  | -0.991010 | -1.966103 | -0.442818 |
| H  | -1.023606 | -0.598968 | -1.518225 |
| C  | -1.026664 | 1.596270  | 1.156341  |
| H  | -1.065036 | 1.197508  | 2.175797  |
| H  | -0.997489 | 2.688216  | 1.274378  |
| C  | -2.251736 | -0.342561 | 0.200770  |
| H  | -2.405934 | -0.825942 | 1.168365  |
| C  | -2.280666 | 1.185206  | 0.367152  |
| Cl | -3.709503 | 1.671679  | 1.368242  |
| C  | -2.360361 | 1.967542  | -0.954491 |
| H  | -1.569960 | 1.678505  | -1.653751 |
| H  | -2.258569 | 3.045254  | -0.778926 |
| H  | -3.317327 | 1.819912  | -1.465922 |
| Br | -3.779374 | -1.026627 | -0.848593 |

SCF Energy (SMD/wB97XD/6-31+G\*\*) =  
-6264.260372

SCF Energy (B3LYP/6-31G\*\*) =  
-6264.29443055



## 1f\_C007

## MMFF Geometry

|    |           |           |           |
|----|-----------|-----------|-----------|
| C  | -1.584901 | -0.977066 | -0.363547 |
| C  | -2.662560 | 0.542924  | 1.431318  |
| C  | -0.151665 | -0.838072 | 0.412023  |
| C  | -2.387438 | 0.329938  | -0.064784 |
| H  | -3.584597 | 0.035153  | 1.740876  |
| H  | -1.873013 | 1.201977  | -0.484647 |
| C  | -1.569091 | 0.048353  | 2.323131  |
| H  | -1.750873 | 0.211948  | 3.384385  |
| C  | -0.458335 | -0.607845 | 1.924902  |
| O  | -2.831779 | 1.930756  | 1.710536  |
| H  | -3.597406 | 2.230220  | 1.188810  |
| Br | -4.129879 | 0.437473  | -1.000404 |
| C  | -2.371659 | -2.231763 | 0.128538  |
| H  | -3.372660 | -2.277794 | -0.312712 |
| H  | -2.499880 | -2.263316 | 1.213468  |
| H  | -1.877960 | -3.163156 | -0.164403 |
| C  | -1.409178 | -1.166583 | -1.891327 |
| H  | -2.369248 | -1.324784 | -2.394264 |
| H  | -0.819637 | -2.058520 | -2.119736 |
| H  | -0.939717 | -0.305554 | -2.372886 |
| C  | 0.476875  | -1.109874 | 2.999639  |
| H  | 0.204707  | -0.731627 | 3.991830  |
| H  | 1.507866  | -0.800166 | 2.825034  |
| H  | 0.437246  | -2.202379 | 3.057852  |
| C  | 0.766348  | -2.089620 | 0.175481  |
| H  | 1.336069  | -2.355985 | 1.069412  |
| H  | 0.175728  | -2.981078 | -0.047367 |
| C  | 0.621984  | 0.447607  | -0.080057 |
| H  | 0.224265  | 1.340328  | 0.421376  |
| H  | 0.454818  | 0.621470  | -1.147751 |
| C  | 1.793626  | -1.898788 | -0.946414 |
| H  | 2.319620  | -2.847436 | -1.117399 |
| H  | 1.266298  | -1.692206 | -1.883135 |
| C  | 2.135338  | 0.371273  | 0.147716  |
| H  | 2.322005  | 0.241250  | 1.215798  |
| C  | 2.805136  | -0.758775 | -0.671660 |
| Cl | 4.163164  | -1.438871 | 0.321099  |
| C  | 3.406717  | -0.347723 | -2.026140 |
| H  | 2.661804  | 0.157121  | -2.651622 |
| H  | 3.756102  | -1.225905 | -2.583318 |
| H  | 4.271101  | 0.316121  | -1.919565 |
| Br | 2.905898  | 2.151246  | -0.172336 |

SCF Energy (SMD/wB97XD/6-31+G\*\*) =  
-6264.257858

SCF Energy (B3LYP/6-31G\*\*) =  
-6264.29480000

## 1f\_C008

## MMFF Geometry

|    |           |           |           |
|----|-----------|-----------|-----------|
| C  | -1.604574 | -0.985011 | -0.314273 |
| C  | -2.628512 | 0.672376  | 1.398977  |
| C  | -0.164576 | -0.821076 | 0.440542  |
| C  | -2.394074 | 0.347071  | -0.087132 |
| H  | -3.575576 | 0.241274  | 1.744541  |
| H  | -1.883205 | 1.181652  | -0.581170 |
| C  | -1.553546 | 0.173571  | 2.315194  |
| H  | -1.741481 | 0.366874  | 3.371011  |
| C  | -0.459899 | -0.524166 | 1.943080  |
| O  | -2.723312 | 2.083526  | 1.588850  |
| H  | -1.828213 | 2.454543  | 1.507042  |
| Br | -4.150871 | 0.390058  | -1.001252 |
| C  | -2.401583 | -2.201518 | 0.252460  |
| H  | -3.391024 | -2.285024 | -0.208991 |
| H  | -2.558682 | -2.149719 | 1.332776  |
| H  | -1.900221 | -3.151215 | 0.044802  |
| C  | -1.438050 | -1.261766 | -1.830265 |
| H  | -2.401709 | -1.433728 | -2.321436 |
| H  | -0.861089 | -2.172839 | -2.010960 |
| H  | -0.957852 | -0.435113 | -2.359326 |
| C  | 0.458362  | -1.020299 | 3.035052  |
| H  | 0.192668  | -0.607539 | 4.015137  |
| H  | 1.497248  | -0.740255 | 2.854385  |
| H  | 0.391113  | -2.109434 | 3.123156  |
| C  | 0.746619  | -2.086483 | 0.248272  |
| H  | 1.318206  | -2.322592 | 1.149376  |
| H  | 0.150880  | -2.982497 | 0.060108  |
| C  | 0.611729  | 0.437431  | -0.111324 |
| H  | 0.217612  | 1.354171  | 0.347388  |
| H  | 0.445172  | 0.561581  | -1.186216 |
| C  | 1.771608  | -1.943868 | -0.883563 |
| H  | 2.292997  | -2.900666 | -1.019492 |
| H  | 1.241456  | -1.771083 | -1.825794 |
| C  | 2.124204  | 0.363071  | 0.122702  |
| H  | 2.306637  | 0.268570  | 1.195663  |
| C  | 2.788877  | -0.798510 | -0.655058 |
| Cl | 4.146220  | -1.444197 | 0.360297  |
| C  | 3.388031  | -0.439622 | -2.025049 |
| H  | 2.642846  | 0.043521  | -2.667105 |
| H  | 3.734060  | -1.338756 | -2.549922 |
| H  | 4.253978  | 0.225917  | -1.945094 |
| Br | 2.900792  | 2.127607  | -0.255988 |

SCF Energy (SMD/wB97XD/6-31+G\*\*) =  
-6264.256601

SCF Energy (B3LYP/6-31G\*\*) =  
-6264.29037842

## 1f\_C009

## MMFF Geometry

|    |           |           |           |
|----|-----------|-----------|-----------|
| C  | -1.601629 | -0.996124 | -0.288926 |
| C  | -2.606807 | 0.747377  | 1.352373  |
| C  | -0.163177 | -0.807324 | 0.459862  |
| C  | -2.384785 | 0.347028  | -0.117162 |
| H  | -3.568871 | 0.366839  | 1.716843  |
| H  | -1.878867 | 1.154927  | -0.658730 |
| C  | -1.545986 | 0.262384  | 2.294143  |
| H  | -1.726155 | 0.489118  | 3.343412  |
| C  | -0.462072 | -0.465581 | 1.951398  |
| O  | -2.647231 | 2.170481  | 1.448276  |
| H  | -2.865998 | 2.396438  | 2.367586  |
| Br | -4.155486 | 0.345382  | -1.012606 |
| C  | -2.404286 | -2.186072 | 0.324378  |
| H  | -3.382386 | -2.301317 | -0.154219 |
| H  | -2.587267 | -2.076701 | 1.396325  |
| H  | -1.893438 | -3.142243 | 0.180148  |
| C  | -1.433525 | -1.332042 | -1.792749 |
| H  | -2.397322 | -1.511865 | -2.280713 |
| H  | -0.864957 | -2.255003 | -1.936770 |
| H  | -0.942678 | -0.530955 | -2.350661 |
| C  | 0.447277  | -0.938872 | 3.060241  |
| H  | 0.180104  | -0.498779 | 4.027914  |
| H  | 1.488948  | -0.670655 | 2.876703  |
| H  | 0.371847  | -2.024814 | 3.176666  |
| C  | 0.749008  | -2.077625 | 0.307103  |
| H  | 1.319693  | -2.286567 | 1.215423  |
| H  | 0.154304  | -2.979320 | 0.144494  |
| C  | 0.613581  | 0.434844  | -0.129671 |
| H  | 0.217720  | 1.365630  | 0.298200  |
| H  | 0.450154  | 0.524194  | -1.208595 |
| C  | 1.774961  | -1.967774 | -0.827196 |
| H  | 2.296914  | -2.927869 | -0.934735 |
| H  | 1.245541  | -1.822662 | -1.774606 |
| C  | 2.124855  | 0.367947  | 0.112412  |
| H  | 2.302694  | 0.302885  | 1.188492  |
| C  | 2.791291  | -0.815795 | -0.630017 |
| Cl | 4.147437  | -1.432289 | 0.405761  |
| C  | 3.392627  | -0.497102 | -2.009082 |
| H  | 2.648657  | -0.032274 | -2.665895 |
| H  | 3.738752  | -1.411291 | -2.507214 |
| H  | 4.259002  | 0.169805  | -1.947348 |
| Br | 2.908544  | 2.118502  | -0.313094 |

SCF Energy (SMD/wB97XD/6-31+G\*\*) =  
-6264.255444

SCF Energy (B3LYP/6-31G\*\*) =  
-6264.28931000

## 1g\_C001

## MMFF Geometry

|    |           |           |           |
|----|-----------|-----------|-----------|
| C  | -1.380965 | 0.102840  | 0.743087  |
| C  | -2.961581 | 0.864045  | -1.187615 |
| C  | -0.130556 | 0.947824  | 0.082732  |
| C  | -2.357913 | -0.310938 | -0.414472 |
| H  | -3.388976 | 0.502750  | -2.130715 |
| H  | -1.819425 | -0.950543 | -1.123207 |
| C  | -1.942307 | 1.904315  | -1.483042 |
| H  | -2.277399 | 2.668169  | -2.183364 |
| C  | -0.701090 | 1.973980  | -0.963052 |
| O  | -4.005077 | 1.528089  | -0.480327 |
| H  | -4.621936 | 0.836866  | -0.179525 |
| Br | -3.845956 | -1.491611 | 0.143416  |
| C  | -2.118307 | 0.965457  | 1.804264  |
| H  | -3.071628 | 0.521170  | 2.106773  |
| H  | -2.326058 | 1.978826  | 1.448607  |
| H  | -1.525689 | 1.054074  | 2.721996  |
| C  | -0.934027 | -1.185628 | 1.473605  |
| H  | -1.749394 | -1.622560 | 2.061383  |
| H  | -0.139043 | -1.006986 | 2.194083  |
| H  | -0.606610 | -1.956848 | 0.769646  |
| C  | 0.174321  | 3.114038  | -1.449486 |
| H  | 0.219953  | 3.909782  | -0.699120 |
| H  | -0.212961 | 3.564261  | -2.370915 |
| H  | 1.189906  | 2.778392  | -1.675080 |
| C  | 0.691240  | 1.754963  | 1.151351  |
| H  | 1.236689  | 2.572489  | 0.670896  |
| H  | 0.032018  | 2.274351  | 1.853304  |
| C  | 0.853483  | 0.023820  | -0.719330 |
| H  | 1.366577  | 0.615381  | -1.488436 |
| H  | 0.286966  | -0.718066 | -1.294302 |
| C  | 1.756854  | 0.989702  | 1.937658  |
| H  | 2.309515  | 1.710726  | 2.556467  |
| H  | 1.280628  | 0.319102  | 2.657010  |
| C  | 1.934809  | -0.698958 | 0.099847  |
| H  | 1.493673  | -1.510269 | 0.681241  |
| C  | 2.742930  | 0.211938  | 1.042470  |
| Cl | 3.739531  | 1.408935  | 0.120842  |
| C  | 3.697525  | -0.584539 | 1.946023  |
| H  | 3.154729  | -1.352135 | 2.509369  |
| H  | 4.189680  | 0.069212  | 2.675939  |
| H  | 4.488043  | -1.086016 | 1.378465  |
| Br | 3.074894  | -1.702271 | -1.164458 |

SCF Energy (SMD/wB97XD/6-31+G\*\*) =  
-6264.259789

SCF Energy (B3LYP/6-31G\*\*) =  
-6264.29924075

**1g\_C002****MMFF Geometry**

|    |           |           |           |
|----|-----------|-----------|-----------|
| C  | -1.464549 | 0.072897  | 0.791883  |
| C  | -2.880825 | 0.968245  | -1.195299 |
| C  | -0.144926 | 0.869995  | 0.231685  |
| C  | -2.387084 | -0.262651 | -0.426637 |
| H  | -3.243520 | 0.662002  | -2.183781 |
| H  | -1.842469 | -0.906640 | -1.125804 |
| C  | -1.806914 | 1.987304  | -1.363248 |
| H  | -2.073073 | 2.803171  | -2.033908 |
| C  | -0.599198 | 1.981978  | -0.763076 |
| O  | -3.955310 | 1.642635  | -0.544994 |
| H  | -4.611386 | 0.961596  | -0.311035 |
| Br | -3.952100 | -1.383051 | 0.018784  |
| C  | -2.217249 | 0.946740  | 1.836863  |
| H  | -3.189260 | 0.520062  | 2.102902  |
| H  | -2.388825 | 1.967576  | 1.484042  |
| H  | -1.655481 | 1.023589  | 2.774336  |
| C  | -1.072468 | -1.241299 | 1.520198  |
| H  | -1.930921 | -1.695647 | 2.026704  |
| H  | -0.329364 | -1.075969 | 2.304316  |
| H  | -0.674729 | -1.989586 | 0.827735  |
| C  | 0.343546  | 3.112266  | -1.104198 |
| H  | -0.052446 | 3.757236  | -1.897224 |
| H  | 1.300157  | 2.729986  | -1.468918 |
| H  | 0.509602  | 3.754163  | -0.234479 |
| C  | 0.640010  | 1.481518  | 1.448009  |
| H  | 0.165600  | 2.418163  | 1.768900  |
| H  | 0.575299  | 0.815222  | 2.314547  |
| C  | 0.806763  | -0.083787 | -0.572318 |
| H  | 1.207296  | 0.420925  | -1.461378 |
| H  | 0.245961  | -0.929475 | -0.982640 |
| C  | 2.138845  | 1.743332  | 1.240287  |
| H  | 2.264036  | 2.612522  | 0.589441  |
| H  | 2.551774  | 2.075109  | 2.202751  |
| C  | 1.983483  | -0.600208 | 0.260019  |
| H  | 1.608793  | -1.129976 | 1.140694  |
| C  | 2.939433  | 0.525524  | 0.710123  |
| Cl | 3.969277  | 1.128479  | -0.656831 |
| C  | 3.896359  | 0.024173  | 1.805016  |
| H  | 3.337076  | -0.337959 | 2.675283  |
| H  | 4.560586  | 0.824555  | 2.152301  |
| H  | 4.533067  | -0.795052 | 1.455196  |
| Br | 2.873405  | -2.044576 | -0.736205 |

**SCF Energy (SMD/wB97XD/6-31+G\*\*) =**  
**-6264.256943**

**SCF Energy (B3LYP/6-31G\*\*) =**  
**-6264.29519147**

**1g\_C003****MMFF Geometry**

|    |           |           |           |
|----|-----------|-----------|-----------|
| C  | 1.188382  | -0.346895 | -1.089868 |
| C  | 3.154049  | -1.589437 | 0.034597  |
| C  | 0.345660  | -0.287746 | 0.321644  |
| C  | 2.742810  | -0.426106 | -0.870076 |
| H  | 3.045211  | -2.534527 | -0.508514 |
| H  | 3.260918  | -0.536898 | -1.831688 |
| C  | 2.317600  | -1.674820 | 1.260505  |
| H  | 2.748583  | -2.277385 | 2.059503  |
| C  | 1.101438  | -1.117179 | 1.426281  |
| O  | 4.524435  | -1.528667 | 0.417191  |
| H  | 4.669758  | -0.637182 | 0.784798  |
| Br | 3.552163  | 1.252133  | -0.199740 |
| C  | 0.911931  | 0.808647  | -2.081759 |
| H  | 1.514899  | 0.688625  | -2.991228 |
| H  | 1.166186  | 1.789747  | -1.675805 |
| H  | -0.127260 | 0.836710  | -2.412885 |
| C  | 0.820117  | -1.639327 | -1.889885 |
| H  | 1.492350  | -1.779085 | -2.745469 |
| H  | -0.193060 | -1.586401 | -2.302448 |
| H  | 0.885515  | -2.543106 | -1.276277 |
| C  | 0.430750  | -1.367076 | 2.767586  |
| H  | 1.149895  | -1.694463 | 3.527800  |
| H  | -0.320299 | -2.158433 | 2.679222  |
| H  | -0.048446 | -0.473250 | 3.170758  |
| C  | 0.145597  | 1.173441  | 0.859696  |
| H  | -0.073736 | 1.152407  | 1.931830  |
| H  | 1.070342  | 1.746927  | 0.797407  |
| C  | -1.087401 | -0.926260 | 0.197525  |
| H  | -1.495778 | -1.115368 | 1.196813  |
| H  | -1.030500 | -1.929097 | -0.240393 |
| C  | -0.973947 | 2.013829  | 0.220907  |
| H  | -1.076721 | 2.941476  | 0.801648  |
| H  | -0.670650 | 2.350354  | -0.773133 |
| C  | -2.126606 | -0.074986 | -0.534486 |
| H  | -1.851635 | 0.039171  | -1.584750 |
| C  | -2.338352 | 1.306078  | 0.117992  |
| Cl | -3.016253 | 1.169199  | 1.791568  |
| C  | -3.293323 | 2.194784  | -0.694277 |
| H  | -2.954769 | 2.286862  | -1.732594 |
| H  | -3.344107 | 3.207181  | -0.276110 |
| H  | -4.315064 | 1.802003  | -0.711952 |
| Br | -3.793679 | -1.123705 | -0.656231 |

**SCF Energy (SMD/wB97XD/6-31+G\*\*) =**  
**-6264.259289**

**SCF Energy (B3LYP/6-31G\*\*) =**  
**-6264.29719469**

**1g\_C004****MMFF Geometry**

|    |           |           |           |
|----|-----------|-----------|-----------|
| C  | -1.385459 | 0.083035  | 0.748392  |
| C  | -2.993549 | 0.890513  | -1.138287 |
| C  | -0.141979 | 0.939349  | 0.088791  |
| C  | -2.376479 | -0.304543 | -0.406692 |
| H  | -3.466282 | 0.543592  | -2.065050 |
| H  | -1.836938 | -0.912494 | -1.142485 |
| C  | -1.961877 | 1.915471  | -1.461485 |
| H  | -2.280647 | 2.672496  | -2.176063 |
| C  | -0.714153 | 1.970230  | -0.954866 |
| O  | -3.996777 | 1.546045  | -0.368062 |
| H  | -4.340859 | 2.284123  | -0.897360 |
| Br | -3.828753 | -1.536520 | 0.122916  |
| C  | -2.109285 | 0.922451  | 1.836251  |
| H  | -3.062510 | 0.474367  | 2.134118  |
| H  | -2.313493 | 1.945707  | 1.507831  |
| H  | -1.508295 | 0.986097  | 2.750743  |
| C  | -0.929269 | -1.218813 | 1.449760  |
| H  | -1.737554 | -1.667618 | 2.038421  |
| H  | -0.127232 | -1.051922 | 2.165585  |
| H  | -0.607639 | -1.976168 | 0.728224  |
| C  | 0.173574  | 3.095050  | -1.456820 |
| H  | -0.211306 | 3.538744  | -2.382404 |
| H  | 1.185710  | 2.748767  | -1.680507 |
| H  | 0.228855  | 3.898583  | -0.715400 |
| C  | 0.676705  | 1.746291  | 1.159151  |
| H  | 1.218991  | 2.567541  | 0.681453  |
| H  | 0.015667  | 2.261417  | 1.862625  |
| C  | 0.844905  | 0.019595  | -0.717018 |
| H  | 1.352531  | 0.611889  | -1.488653 |
| H  | 0.279552  | -0.725118 | -1.289721 |
| C  | 1.742700  | 0.980013  | 1.943497  |
| H  | 2.290616  | 1.698840  | 2.568988  |
| H  | 1.266313  | 0.302183  | 2.656154  |
| C  | 1.933479  | -0.698640 | 0.097044  |
| H  | 1.500894  | -1.518603 | 0.672636  |
| C  | 2.734371  | 0.212923  | 1.045217  |
| Cl | 3.723996  | 1.421518  | 0.130405  |
| C  | 3.693467  | -0.581978 | 1.945329  |
| H  | 3.155104  | -1.355399 | 2.504945  |
| H  | 4.181528  | 0.071282  | 2.678420  |
| H  | 4.487059  | -1.076108 | 1.375624  |
| Br | 3.082276  | -1.682967 | -1.175204 |

**SCF Energy (SMD/wB97XD/6-31+G\*\*) =**  
**-6264.256128**

**SCF Energy (B3LYP/6-31G\*\*) =**  
**-6264.29139704**

**1g\_C005****MMFF Geometry**

|    |           |           |           |
|----|-----------|-----------|-----------|
| C  | -1.390259 | 0.090655  | 0.744155  |
| C  | -2.982915 | 0.878258  | -1.170197 |
| C  | -0.142075 | 0.940742  | 0.085711  |
| C  | -2.377821 | -0.307223 | -0.411397 |
| H  | -3.421006 | 0.515444  | -2.107543 |
| H  | -1.835287 | -0.928838 | -1.133535 |
| C  | -1.949144 | 1.904564  | -1.486339 |
| H  | -2.268139 | 2.650720  | -2.213712 |
| C  | -0.709297 | 1.968967  | -0.963027 |
| O  | -4.031677 | 1.527629  | -0.454787 |
| H  | -3.702605 | 2.374410  | -0.111322 |
| Br | -3.835327 | -1.526530 | 0.130707  |
| C  | -2.116851 | 0.938158  | 1.823437  |
| H  | -3.080492 | 0.504754  | 2.108461  |
| H  | -2.300045 | 1.964895  | 1.495796  |
| H  | -1.526265 | 0.992316  | 2.745451  |
| C  | -0.937108 | -1.206543 | 1.456938  |
| H  | -1.747257 | -1.649977 | 2.047083  |
| H  | -0.136677 | -1.035070 | 2.173353  |
| H  | -0.614103 | -1.969686 | 0.742152  |
| C  | 0.180245  | 3.093448  | -1.463127 |
| H  | 0.231345  | 3.898345  | -0.722891 |
| H  | -0.200473 | 3.535444  | -2.391232 |
| H  | 1.193580  | 2.746937  | -1.681093 |
| C  | 0.676004  | 1.748073  | 1.156632  |
| H  | 1.217672  | 2.569891  | 0.679275  |
| H  | 0.014657  | 2.262364  | 1.860369  |
| C  | 0.843979  | 0.016168  | -0.715746 |
| H  | 1.353135  | 0.604973  | -1.489146 |
| H  | 0.277887  | -0.729528 | -1.286375 |
| C  | 1.742649  | 0.983235  | 1.941950  |
| H  | 2.291332  | 1.703629  | 2.564998  |
| H  | 1.266906  | 0.307666  | 2.657147  |
| C  | 1.930789  | -0.701250 | 0.101398  |
| H  | 1.495878  | -1.517452 | 0.680702  |
| C  | 2.733408  | 0.212965  | 1.045460  |
| Cl | 3.721630  | 1.418703  | 0.125867  |
| C  | 3.693227  | -0.579000 | 1.947326  |
| H  | 3.155380  | -1.350807 | 2.509657  |
| H  | 4.181664  | 0.076583  | 2.678090  |
| H  | 4.486576  | -1.074675 | 1.378629  |
| Br | 3.077699  | -1.692860 | -1.166273 |

**SCF Energy (SMD/wB97XD/6-31+G\*\*) =**  
**-6264.257636**

**SCF Energy (B3LYP/6-31G\*\*) =**  
**-6264.29307963**

**1g\_C006****MMFF Geometry**

|    |           |           |           |
|----|-----------|-----------|-----------|
| C  | -1.470669 | 0.061891  | 0.799786  |
| C  | -2.908624 | 0.989031  | -1.154921 |
| C  | -0.154961 | 0.865129  | 0.239047  |
| C  | -2.401130 | -0.255968 | -0.417759 |
| H  | -3.310301 | 0.691977  | -2.131161 |
| H  | -1.849050 | -0.871264 | -1.137066 |
| C  | -1.821967 | 1.995670  | -1.347463 |
| H  | -2.070046 | 2.804256  | -2.032946 |
| C  | -0.609542 | 1.979557  | -0.756308 |
| O  | -3.953881 | 1.652331  | -0.448643 |
| H  | -4.254330 | 2.396030  | -0.996279 |
| Br | -3.930441 | -1.428824 | 0.002231  |
| C  | -2.216672 | 0.921593  | 1.860690  |
| H  | -3.195167 | 0.500348  | 2.111879  |
| H  | -2.372553 | 1.952474  | 1.530324  |
| H  | -1.657979 | 0.971033  | 2.801941  |
| C  | -1.072520 | -1.259266 | 1.512610  |
| H  | -1.926057 | -1.716248 | 2.025169  |
| H  | -0.321263 | -1.100570 | 2.290386  |
| H  | -0.682896 | -2.002690 | 0.810449  |
| C  | 0.345240  | 3.096045  | -1.111434 |
| H  | -0.045332 | 3.736746  | -1.910573 |
| H  | 1.297859  | 2.701712  | -1.473084 |
| H  | 0.518075  | 3.745178  | -0.248396 |
| C  | 0.629671  | 1.475605  | 1.455623  |
| H  | 0.153375  | 2.410659  | 1.778409  |
| H  | 0.566425  | 0.806841  | 2.320498  |
| C  | 0.797702  | -0.087101 | -0.567242 |
| H  | 1.193422  | 0.416549  | -1.458872 |
| H  | 0.238100  | -0.934892 | -0.975059 |
| C  | 2.127925  | 1.741093  | 1.249429  |
| H  | 2.251779  | 2.615598  | 0.605446  |
| H  | 2.539914  | 2.066640  | 2.214454  |
| C  | 1.979135  | -0.599849 | 0.260799  |
| H  | 1.610030  | -1.134083 | 1.141023  |
| C  | 2.931454  | 0.528965  | 0.710802  |
| Cl | 3.951805  | 1.142427  | -0.659113 |
| C  | 3.896508  | 0.028571  | 1.799019  |
| H  | 3.343456  | -0.340270 | 2.670449  |
| H  | 4.557845  | 0.831318  | 2.146378  |
| H  | 4.536234  | -0.785555 | 1.442885  |
| Br | 2.873856  | -2.036533 | -0.743038 |

**SCF Energy (SMD/wB97XD/6-31+G\*\*) =**  
**-6264.253251**

**SCF Energy (B3LYP/6-31G\*\*) =**  
**-6264.28722580**

**1g\_C007****MMFF Geometry**

|    |           |           |           |
|----|-----------|-----------|-----------|
| C  | 1.592537  | 0.802606  | 0.462128  |
| C  | 2.509940  | -1.597328 | 0.034896  |
| C  | 0.067101  | 0.188118  | 0.580511  |
| C  | 2.411540  | -0.152065 | -0.469211 |
| H  | 2.719791  | -2.270842 | -0.803978 |
| H  | 1.941301  | -0.165911 | -1.459311 |
| C  | 1.277985  | -2.050566 | 0.743372  |
| H  | 1.340946  | -3.073996 | 1.112379  |
| C  | 0.197703  | -1.298265 | 1.044828  |
| O  | 3.560655  | -1.772074 | 0.987439  |
| H  | 4.350095  | -1.336935 | 0.617981  |
| Br | 4.226162  | 0.496909  | -0.904783 |
| C  | 2.234006  | 0.922250  | 1.873746  |
| H  | 3.289511  | 1.207167  | 1.816402  |
| H  | 2.179111  | -0.005680 | 2.448876  |
| H  | 1.737822  | 1.697763  | 2.467892  |
| C  | 1.616450  | 2.238876  | -0.141575 |
| H  | 2.587005  | 2.722553  | 0.019960  |
| H  | 0.880413  | 2.905116  | 0.311213  |
| H  | 1.446420  | 2.238711  | -1.222619 |
| C  | -0.816165 | -1.931318 | 1.971574  |
| H  | -0.863539 | -1.394097 | 2.923180  |
| H  | -0.557841 | -2.967397 | 2.221392  |
| H  | -1.811332 | -1.969943 | 1.537992  |
| C  | -0.760992 | 1.035492  | 1.601373  |
| H  | -0.476026 | 0.778866  | 2.629410  |
| H  | -0.508803 | 2.094694  | 1.512852  |
| C  | -0.613357 | 0.220103  | -0.844019 |
| H  | -0.235195 | -0.607933 | -1.458113 |
| H  | -0.280196 | 1.120258  | -1.367222 |
| C  | -2.288506 | 0.947694  | 1.488687  |
| H  | -2.642100 | -0.023026 | 1.844752  |
| H  | -2.719272 | 1.678726  | 2.186951  |
| C  | -2.146530 | 0.270673  | -0.948484 |
| H  | -2.400882 | 0.610259  | -1.961557 |
| C  | -2.808547 | 1.214345  | 0.071585  |
| Cl | -4.611192 | 1.050619  | 0.086767  |
| C  | -2.542229 | 2.680160  | -0.330758 |
| H  | -1.475067 | 2.907251  | -0.400437 |
| H  | -2.975568 | 3.378134  | 0.395376  |
| H  | -2.979697 | 2.907465  | -1.310374 |
| Br | -2.861234 | -1.555760 | -0.988631 |

**SCF Energy (SMD/wB97XD/6-31+G\*\*) =**  
**-6264.254364**

**SCF Energy (B3LYP/6-31G\*\*) =**  
**-6264.29238729**

**1g\_C008****MMFF Geometry**

|    |           |           |           |
|----|-----------|-----------|-----------|
| C  | -1.474027 | 0.066988  | 0.793990  |
| C  | -2.895687 | 0.976665  | -1.188784 |
| C  | -0.154938 | 0.866075  | 0.235449  |
| C  | -2.403382 | -0.258769 | -0.423497 |
| H  | -3.255751 | 0.661931  | -2.175382 |
| H  | -1.851040 | -0.889669 | -1.129126 |
| C  | -1.809399 | 1.986882  | -1.369740 |
| H  | -2.058049 | 2.786041  | -2.067730 |
| C  | -0.605697 | 1.979704  | -0.762061 |
| O  | -3.988147 | 1.635153  | -0.550320 |
| H  | -3.657441 | 2.425528  | -0.093496 |
| Br | -3.939846 | -1.416255 | 0.010455  |
| C  | -2.219305 | 0.931601  | 1.850615  |
| H  | -3.210289 | 0.530391  | 2.083796  |
| H  | -2.346077 | 1.968513  | 1.529391  |
| H  | -1.673068 | 0.961233  | 2.800199  |
| C  | -1.078762 | -1.252469 | 1.512983  |
| H  | -1.933508 | -1.705770 | 2.026763  |
| H  | -0.327777 | -1.092568 | 2.290725  |
| H  | -0.689711 | -1.999308 | 0.814087  |
| C  | 0.349187  | 3.097727  | -1.112913 |
| H  | -0.039404 | 3.738695  | -1.912803 |
| H  | 1.303542  | 2.704456  | -1.471157 |
| H  | 0.518042  | 3.746371  | -0.248717 |
| C  | 0.628216  | 1.476600  | 1.453112  |
| H  | 0.153203  | 2.413024  | 1.773766  |
| H  | 0.561504  | 0.809497  | 2.318934  |
| C  | 0.797572  | -0.088770 | -0.567783 |
| H  | 1.195403  | 0.413292  | -1.459424 |
| H  | 0.237257  | -0.936184 | -0.975344 |
| C  | 2.127504  | 1.739025  | 1.250083  |
| H  | 2.254182  | 2.613763  | 0.606888  |
| H  | 2.538002  | 2.063378  | 2.216153  |
| C  | 1.977140  | -0.602273 | 0.262636  |
| H  | 1.605786  | -1.134628 | 1.143078  |
| C  | 2.930377  | 0.525800  | 0.712535  |
| Cl | 3.951444  | 1.137763  | -0.657151 |
| C  | 3.894509  | 0.025345  | 1.801507  |
| H  | 3.340736  | -0.342875 | 2.672741  |
| H  | 4.556030  | 0.827907  | 2.148948  |
| H  | 4.534081  | -0.789220 | 1.446109  |
| Br | 2.871135  | -2.041396 | -0.737686 |

**SCF Energy (SMD/wB97XD/6-31+G\*\*) =**  
**-6264.254966**

**SCF Energy (B3LYP/6-31G\*\*) =**  
**-6264.28907022**

**1g\_C009****MMFF Geometry**

|    |           |           |           |
|----|-----------|-----------|-----------|
| C  | 1.191140  | -0.318368 | -1.090111 |
| C  | 3.156230  | -1.572570 | 0.017522  |
| C  | 0.349284  | -0.273410 | 0.322094  |
| C  | 2.747146  | -0.393456 | -0.868581 |
| H  | 3.015865  | -2.507826 | -0.536149 |
| H  | 3.265006  | -0.490863 | -1.831887 |
| C  | 2.330932  | -1.655666 | 1.255265  |
| H  | 2.757182  | -2.245707 | 2.064070  |
| C  | 1.112511  | -1.101774 | 1.424043  |
| O  | 4.542062  | -1.537674 | 0.342364  |
| H  | 4.721385  | -2.245842 | 0.981737  |
| Br | 3.538982  | 1.285839  | -0.184832 |
| C  | 0.909970  | 0.844230  | -2.072967 |
| H  | 1.515132  | 0.735023  | -2.982336 |
| H  | 1.157377  | 1.823652  | -1.658859 |
| H  | -0.128962 | 0.868856  | -2.405584 |
| C  | 0.825972  | -1.604305 | -1.902391 |
| H  | 1.500639  | -1.735877 | -2.757338 |
| H  | -0.186252 | -1.548858 | -2.316940 |
| H  | 0.889483  | -2.513661 | -1.297024 |
| C  | 0.447605  | -1.347988 | 2.769505  |
| H  | 1.169426  | -1.675801 | 3.526996  |
| H  | -0.304971 | -2.138397 | 2.686063  |
| H  | -0.028167 | -0.453559 | 3.174869  |
| C  | 0.135194  | 1.184582  | 0.865353  |
| H  | -0.084465 | 1.158506  | 1.937055  |
| H  | 1.054365  | 1.767152  | 0.805568  |
| C  | -1.077862 | -0.924055 | 0.195891  |
| H  | -1.484630 | -1.119901 | 1.194532  |
| H  | -1.012112 | -1.924986 | -0.245117 |
| C  | -0.992228 | 2.017203  | 0.230213  |
| H  | -1.104223 | 2.940973  | 0.815424  |
| H  | -0.691858 | 2.361664  | -0.761995 |
| C  | -2.123745 | -0.079367 | -0.534408 |
| H  | -1.848219 | 0.042078  | -1.583750 |
| C  | -2.349530 | 1.296825  | 0.123409  |
| Cl | -3.028125 | 1.145896  | 1.795680  |
| C  | -3.312435 | 2.179512  | -0.686058 |
| H  | -2.973905 | 2.279196  | -1.723681 |
| H  | -3.373461 | 3.189616  | -0.263735 |
| H  | -4.330278 | 1.776859  | -0.706297 |
| Br | -3.780521 | -1.143824 | -0.662990 |

**SCF Energy (SMD/wB97XD/6-31+G\*\*) =**  
**-6264.255292**

**SCF Energy (B3LYP/6-31G\*\*) =**  
**-6264.28891489**

## 1g\_C010

## MMFF Geometry

|    |           |           |           |
|----|-----------|-----------|-----------|
| C  | -1.598881 | -0.793227 | 0.483032  |
| C  | -2.539762 | 1.592558  | 0.040994  |
| C  | -0.075920 | -0.170148 | 0.588736  |
| C  | -2.423971 | 0.146935  | -0.457959 |
| H  | -2.789499 | 2.250626  | -0.799545 |
| H  | -1.938839 | 0.166638  | -1.440855 |
| C  | -1.293471 | 2.072344  | 0.713501  |
| H  | -1.337243 | 3.107759  | 1.047964  |
| C  | -0.207223 | 1.329012  | 1.017321  |
| O  | -3.574591 | 1.730205  | 1.015907  |
| H  | -3.701518 | 2.679438  | 1.177886  |
| Br | -4.212139 | -0.538134 | -0.934341 |
| C  | -2.236538 | -0.896322 | 1.897344  |
| H  | -3.296342 | -1.166046 | 1.843903  |
| H  | -2.164667 | 0.033480  | 2.467678  |
| H  | -1.748916 | -1.675311 | 2.494196  |
| C  | -1.616395 | -2.239065 | -0.098070 |
| H  | -2.581005 | -2.728469 | 0.081351  |
| H  | -0.869848 | -2.891429 | 0.357727  |
| H  | -1.456963 | -2.254701 | -1.180659 |
| C  | 0.821579  | 1.987143  | 1.909964  |
| H  | 0.569233  | 3.030830  | 2.132673  |
| H  | 1.810602  | 2.010260  | 1.462412  |
| H  | 0.880741  | 1.478129  | 2.876371  |
| C  | 0.752529  | -0.991076 | 1.630653  |
| H  | 0.468544  | -0.706357 | 2.651640  |
| H  | 0.498671  | -2.052018 | 1.570763  |
| C  | 0.606069  | -0.234163 | -0.834714 |
| H  | 0.231622  | 0.582954  | -1.465472 |
| H  | 0.269049  | -1.142788 | -1.340230 |
| C  | 2.279971  | -0.908377 | 1.514526  |
| H  | 2.635343  | 0.070816  | 1.844692  |
| H  | 2.710087  | -1.621310 | 2.231669  |
| C  | 2.138827  | -0.295553 | -0.939797 |
| H  | 2.389537  | -0.665127 | -1.943284 |
| C  | 2.799238  | -1.213016 | 0.104858  |
| Cl | 4.602341  | -1.051759 | 0.116637  |
| C  | 2.530803  | -2.688299 | -0.259097 |
| H  | 1.463376  | -2.914575 | -0.325474 |
| H  | 2.960913  | -3.367767 | 0.486238  |
| H  | 2.969968  | -2.942425 | -1.231342 |
| Br | 2.862510  | 1.525653  | -1.036463 |

SCF Energy (SMD/wB97XD/6-31+G\*\*) =  
-6264.251113

SCF Energy (B3LYP/6-31G\*\*) =  
-6264.28510752

## 1g\_C011

## MMFF Geometry

|    |          |          |          |
|----|----------|----------|----------|
| C  | -1.33480 | -1.09810 | -0.63774 |
| C  | -3.35201 | 0.36371  | -1.30902 |
| C  | -0.37740 | 0.22450  | -0.50631 |
| C  | -2.84536 | -0.76272 | -0.39453 |
| H  | -3.63327 | -0.08914 | -2.26825 |
| H  | -3.45890 | -1.65247 | -0.58988 |
| C  | -2.33917 | 1.41192  | -1.63359 |
| H  | -2.73475 | 2.23657  | -2.22650 |
| C  | -1.02167 | 1.37491  | -1.34215 |
| O  | -4.52954 | 1.00457  | -0.83585 |
| H  | -4.37373 | 1.21622  | 0.10266  |
| Br | -3.31987 | -0.42738 | 1.48822  |
| C  | -0.90019 | -2.28327 | 0.26103  |
| H  | -1.60175 | -3.12061 | 0.15801  |
| H  | -0.85719 | -2.03936 | 1.32369  |
| H  | 0.08296  | -2.66750 | -0.02838 |
| C  | -1.26985 | -1.68249 | -2.09550 |
| H  | -2.08759 | -2.39319 | -2.26826 |
| H  | -0.34810 | -2.24412 | -2.27859 |
| H  | -1.34074 | -0.91024 | -2.86667 |
| C  | -0.17290 | 2.50814  | -1.87532 |
| H  | -0.78333 | 3.34298  | -2.23904 |
| H  | 0.43058  | 2.16658  | -2.72229 |
| H  | 0.48817  | 2.92351  | -1.11637 |
| C  | -0.29226 | 0.74226  | 0.97741  |
| H  | -1.14458 | 1.39377  | 1.20378  |
| H  | -0.34487 | -0.08962 | 1.68379  |
| C  | 1.08470  | -0.10164 | -0.99081 |
| H  | 1.53045  | 0.74044  | -1.52812 |
| H  | 1.08721  | -0.90481 | -1.72959 |
| C  | 0.97217  | 1.52713  | 1.35160  |
| H  | 0.95580  | 2.48458  | 0.82471  |
| H  | 0.89851  | 1.80355  | 2.41210  |
| C  | 2.02594  | -0.45307 | 0.16593  |
| H  | 1.60148  | -1.27366 | 0.75178  |
| C  | 2.28932  | 0.75424  | 1.09354  |
| Cl | 3.45387  | 1.94087  | 0.37015  |
| C  | 2.88954  | 0.28886  | 2.43034  |
| H  | 2.21514  | -0.40953 | 2.93895  |
| H  | 3.05830  | 1.13341  | 3.10895  |
| H  | 3.85155  | -0.21673 | 2.29602  |
| Br | 3.65967  | -1.26829 | -0.56015 |

SCF Energy (SMD/wB97XD/6-31+G\*\*) =  
-6264.248586

SCF Energy (B3LYP/6-31G\*\*) =  
-6264.28667575

## 1h\_C001

## MMFF Geometry

|    |           |           |           |
|----|-----------|-----------|-----------|
| C  | -1.510970 | 0.218247  | 0.819227  |
| C  | -2.736916 | 0.614213  | -1.437065 |
| C  | -0.131195 | 0.841301  | 0.181654  |
| C  | -2.343386 | -0.394805 | -0.352098 |
| H  | -2.989339 | 0.081653  | -2.361485 |
| H  | -1.758575 | -1.195435 | -0.820231 |
| C  | -1.657137 | 1.604759  | -1.716922 |
| H  | -1.890784 | 2.283417  | -2.536537 |
| C  | -0.506351 | 1.757490  | -1.027918 |
| O  | -3.875792 | 1.396946  | -1.079846 |
| H  | -4.542328 | 0.777898  | -0.730621 |
| Br | -3.966582 | -1.362406 | 0.223818  |
| C  | -2.303585 | 1.328649  | 1.565348  |
| H  | -3.298275 | 0.986377  | 1.867827  |
| H  | -2.436420 | 2.231281  | 0.962697  |
| H  | -1.791742 | 1.630190  | 2.486108  |
| C  | -1.223998 | -0.894819 | 1.870045  |
| H  | -2.109112 | -1.104492 | 2.481877  |
| H  | -0.433630 | -0.623646 | 2.572866  |
| H  | -0.937656 | -1.840704 | 1.398680  |
| C  | 0.383915  | 2.902420  | -1.447965 |
| H  | -0.015662 | 3.441063  | -2.315498 |
| H  | 1.376192  | 2.557978  | -1.739810 |
| H  | 0.471674  | 3.641082  | -0.646265 |
| C  | 0.637293  | 1.636374  | 1.291731  |
| H  | 0.156560  | 2.609821  | 1.455095  |
| H  | 0.551507  | 1.121026  | 2.252076  |
| C  | 0.768209  | -0.318274 | -0.366929 |
| H  | 0.351039  | -0.697087 | -1.309971 |
| H  | 0.737501  | -1.170583 | 0.317238  |
| C  | 2.137332  | 1.881128  | 1.073626  |
| H  | 2.280281  | 2.676104  | 0.335585  |
| H  | 2.556036  | 2.289385  | 2.004166  |
| C  | 2.242454  | 0.029738  | -0.596734 |
| H  | 2.337716  | 0.705266  | -1.450925 |
| C  | 2.932261  | 0.636386  | 0.639248  |
| Cl | 2.963146  | -0.521913 | 2.028478  |
| C  | 4.382282  | 1.058382  | 0.354275  |
| H  | 5.033100  | 0.203126  | 0.145835  |
| H  | 4.815174  | 1.590457  | 1.209814  |
| H  | 4.431829  | 1.732346  | -0.508568 |
| Br | 3.147054  | -1.598642 | -1.252744 |

SCF Energy (SMD/wB97XD/6-31+G\*\*) =  
-6264.2594737

SCF Energy (B3LYP/6-31G\*\*) =  
-6264.30169607

## 1h\_C002

## MMFF Geometry

|    |           |           |           |
|----|-----------|-----------|-----------|
| C  | -1.513166 | 0.185758  | 0.830413  |
| C  | -2.772881 | 0.686271  | -1.384219 |
| C  | -0.139959 | 0.836687  | 0.205788  |
| C  | -2.357078 | -0.374963 | -0.358907 |
| H  | -3.067403 | 0.192176  | -2.317788 |
| H  | -1.763780 | -1.136914 | -0.878515 |
| C  | -1.681254 | 1.671300  | -1.656002 |
| H  | -1.900425 | 2.369315  | -2.462377 |
| C  | -0.521811 | 1.791528  | -0.974314 |
| O  | -3.887756 | 1.456166  | -0.936966 |
| H  | -4.190777 | 1.997558  | -1.684020 |
| Br | -3.940990 | -1.419069 | 0.182759  |
| C  | -2.299416 | 1.261352  | 1.631665  |
| H  | -3.297854 | 0.910385  | 1.911464  |
| H  | -2.421516 | 2.196022  | 1.077400  |
| H  | -1.788434 | 1.510299  | 2.568576  |
| C  | -1.213285 | -0.968906 | 1.831851  |
| H  | -2.088910 | -1.199249 | 2.449987  |
| H  | -0.409890 | -0.727463 | 2.530938  |
| H  | -0.938268 | -1.896550 | 1.319202  |
| C  | 0.379485  | 2.936229  | -1.372323 |
| H  | 0.479312  | 3.654063  | -0.553283 |
| H  | -0.019170 | 3.500482  | -2.223855 |
| H  | 1.366276  | 2.589523  | -1.678550 |
| C  | 0.628981  | 1.598904  | 1.338394  |
| H  | 0.147475  | 2.566792  | 1.530361  |
| H  | 0.543447  | 1.055174  | 2.283170  |
| C  | 0.762451  | -0.301632 | -0.383839 |
| H  | 0.347049  | -0.645539 | -1.340945 |
| H  | 0.731312  | -1.178902 | 0.267692  |
| C  | 2.128741  | 1.850963  | 1.127746  |
| H  | 2.271164  | 2.666932  | 0.412828  |
| H  | 2.546920  | 2.232426  | 2.069814  |
| C  | 2.237743  | 0.052020  | -0.597670 |
| H  | 2.336681  | 0.752902  | -1.430475 |
| C  | 2.924893  | 0.620075  | 0.657706  |
| Cl | 2.954231  | -0.580091 | 2.010252  |
| C  | 4.375292  | 1.051245  | 0.388330  |
| H  | 5.026826  | 0.203074  | 0.154677  |
| H  | 4.806528  | 1.556807  | 1.260624  |
| H  | 4.426063  | 1.751565  | -0.453195 |
| Br | 3.143992  | -1.554921 | -1.302759 |

SCF Energy (SMD/wB97XD/6-31+G\*\*) =  
-6264.2594737

SCF Energy (B3LYP/6-31G\*\*) =  
-6264.29374580



## 1h\_C003

## MMFF Geometry

|    |           |           |           |
|----|-----------|-----------|-----------|
| C  | 1.361344  | -0.328605 | -1.235136 |
| C  | 3.200101  | -1.562262 | 0.074203  |
| C  | 0.331991  | -0.397327 | 0.044091  |
| C  | 2.864554  | -0.352149 | -0.806241 |
| H  | 3.339387  | -2.432544 | -0.578745 |
| H  | 3.508924  | -0.388074 | -1.694534 |
| C  | 2.126607  | -1.930737 | 1.042710  |
| H  | 2.428521  | -2.696297 | 1.757410  |
| C  | 0.857516  | -1.470324 | 1.053489  |
| O  | 4.424550  | -1.427494 | 0.786090  |
| H  | 4.414601  | -0.540154 | 1.189890  |
| Br | 3.500878  | 1.315435  | 0.034755  |
| C  | 1.110123  | 0.875763  | -2.185926 |
| H  | 1.778357  | 0.821900  | -3.054712 |
| H  | 1.288926  | 1.848092  | -1.723466 |
| H  | 0.088977  | 0.887959  | -2.577244 |
| C  | 1.155522  | -1.587945 | -2.148713 |
| H  | 1.947543  | -1.657248 | -2.904351 |
| H  | 0.209234  | -1.544076 | -2.698707 |
| H  | 1.160263  | -2.524541 | -1.583372 |
| C  | -0.065500 | -2.077149 | 2.083344  |
| H  | 0.460366  | -2.761124 | 2.760142  |
| H  | -0.846933 | -2.669182 | 1.598795  |
| H  | -0.520014 | -1.318514 | 2.719360  |
| C  | 0.266263  | 0.973518  | 0.797193  |
| H  | 1.110384  | 1.061995  | 1.490189  |
| H  | 0.371848  | 1.800231  | 0.092598  |
| C  | -1.095432 | -0.774372 | -0.494620 |
| H  | -1.128942 | -1.851564 | -0.709968 |
| H  | -1.254512 | -0.287080 | -1.462051 |
| C  | -0.989622 | 1.284850  | 1.619266  |
| H  | -0.971725 | 0.702702  | 2.546155  |
| H  | -0.933435 | 2.332648  | 1.946260  |
| C  | -2.300535 | -0.419315 | 0.387174  |
| H  | -2.353600 | -1.088769 | 1.249194  |
| C  | -2.310546 | 1.037643  | 0.874306  |
| Cl | -2.422132 | 2.207293  | -0.498895 |
| C  | -3.475349 | 1.331349  | 1.832596  |
| H  | -4.449536 | 1.268990  | 1.337019  |
| H  | -3.394485 | 2.339377  | 2.256603  |
| H  | -3.482232 | 0.624575  | 2.670222  |
| Br | -3.935573 | -0.905462 | -0.607915 |

SCF Energy (SMD/wB97XD/6-31+G\*\*) =  
-6264.2588513

SCF Energy (B3LYP/6-31G\*\*) =  
-6264.29774312

## 1h\_C004

## MMFF Geometry

|    |           |           |           |
|----|-----------|-----------|-----------|
| C  | -1.364229 | -0.291603 | 1.234886  |
| C  | -3.209600 | -1.543656 | -0.046297 |
| C  | -0.335430 | -0.387738 | -0.042175 |
| C  | -2.867886 | -0.311496 | 0.802406  |
| H  | -3.330392 | -2.396250 | 0.634059  |
| H  | -3.511798 | -0.325102 | 1.691876  |
| C  | -2.138486 | -1.931861 | -1.016394 |
| H  | -2.426739 | -2.708330 | -1.722788 |
| C  | -0.867344 | -1.475138 | -1.034269 |
| O  | -4.460519 | -1.422018 | -0.713164 |
| H  | -4.569611 | -2.185037 | -1.302730 |
| Br | -3.482879 | 1.351801  | -0.059044 |
| C  | -1.104924 | 0.925859  | 2.167290  |
| H  | -1.775907 | 0.891363  | 3.034950  |
| H  | -1.273328 | 1.892653  | 1.689723  |
| H  | -0.084754 | 0.935189  | 2.561310  |
| C  | -1.166429 | -1.536734 | 2.169907  |
| H  | -1.961935 | -1.591057 | 2.923080  |
| H  | -0.222302 | -1.486896 | 2.723179  |
| H  | -1.170855 | -2.482582 | 1.620234  |
| C  | 0.054259  | -2.096206 | -2.057352 |
| H  | -0.473097 | -2.786101 | -2.726907 |
| H  | 0.833631  | -2.685286 | -1.565968 |
| H  | 0.511028  | -1.346206 | -2.701810 |
| C  | -0.259172 | 0.970515  | -0.817282 |
| H  | -1.099968 | 1.051725  | -1.515230 |
| H  | -0.363393 | 1.808959  | -0.126541 |
| C  | 1.089077  | -0.766171 | 0.503757  |
| H  | 1.115403  | -1.840403 | 0.734397  |
| H  | 1.250221  | -0.266383 | 1.464426  |
| C  | 1.001164  | 1.264297  | -1.638919 |
| H  | 0.982796  | 0.670711  | -2.558520 |
| H  | 0.951973  | 2.308146  | -1.979424 |
| C  | 2.297597  | -0.431107 | -0.381064 |
| H  | 2.347067  | -1.112030 | -1.234244 |
| C  | 2.318456  | 1.019076  | -0.887253 |
| Cl | 2.435500  | 2.205602  | 0.470647  |
| C  | 3.487374  | 1.292316  | -1.846682 |
| H  | 4.460019  | 1.230369  | -1.348025 |
| H  | 3.414002  | 2.295054  | -2.284382 |
| H  | 3.491622  | 0.574311  | -2.674722 |
| Br | 3.928034  | -0.916601 | 0.622045  |

SCF Energy (SMD/wB97XD/6-31+G\*\*) =  
-6264.2549295

SCF Energy (B3LYP/6-31G\*\*) =  
-6264.28900332

## 1i\_C001

## MMFF Geometry

|    |           |           |           |
|----|-----------|-----------|-----------|
| C  | -1.331320 | -0.418331 | -0.207107 |
| C  | -3.140953 | 1.453906  | -0.030918 |
| C  | -0.151836 | 0.652487  | 0.213778  |
| C  | -2.682993 | 0.067722  | 0.427761  |
| H  | -3.916972 | 1.827815  | 0.647823  |
| H  | -2.577599 | 0.082735  | 1.518884  |
| C  | -2.011855 | 2.418989  | -0.055403 |
| H  | -2.316353 | 3.455952  | -0.190165 |
| C  | -0.703831 | 2.116793  | 0.059376  |
| O  | -3.692393 | 1.460860  | -1.344344 |
| H  | -4.354831 | 0.747362  | -1.373045 |
| Br | -4.204464 | -1.175872 | 0.184520  |
| C  | -1.065165 | -1.858230 | 0.294853  |
| H  | -1.759720 | -2.578532 | -0.152259 |
| H  | -1.185963 | -1.937297 | 1.379660  |
| H  | -0.077923 | -2.225462 | 0.025951  |
| C  | -1.449177 | -0.514433 | -1.752554 |
| H  | -2.347918 | -1.055211 | -2.064855 |
| H  | -0.603893 | -1.066910 | -2.178748 |
| H  | -1.473877 | 0.468634  | -2.231647 |
| C  | 0.264344  | 3.285504  | 0.043963  |
| H  | -0.241436 | 4.239610  | 0.232667  |
| H  | 0.750054  | 3.368626  | -0.933571 |
| H  | 1.031978  | 3.187182  | 0.815965  |
| C  | 0.265507  | 0.506601  | 1.718055  |
| H  | 0.672044  | 1.455997  | 2.087185  |
| H  | -0.615082 | 0.333094  | 2.346408  |
| C  | 1.135316  | 0.531146  | -0.681736 |
| H  | 1.718643  | 1.455594  | -0.620270 |
| H  | 0.867028  | 0.477829  | -1.742265 |
| C  | 1.309931  | -0.569710 | 2.051402  |
| H  | 1.604342  | -0.443793 | 3.102889  |
| H  | 0.849667  | -1.560535 | 2.014588  |
| C  | 2.110976  | -0.591281 | -0.323418 |
| H  | 1.683696  | -1.562993 | -0.573510 |
| C  | 2.560971  | -0.558989 | 1.151472  |
| Cl | 3.505383  | 0.936191  | 1.539476  |
| C  | 3.438119  | -1.766631 | 1.518100  |
| H  | 2.931654  | -2.707180 | 1.273047  |
| H  | 3.658791  | -1.784596 | 2.592056  |
| H  | 4.398410  | -1.759855 | 0.992469  |
| Br | 3.632026  | -0.497083 | -1.583129 |

SCF Energy (SMD/wB97XD/6-31+G\*\*) =  
-6264.2590807

SCF Energy (B3LYP/6-31G\*\*) =  
-6264.29888838

## 1i\_C002

## MMFF Geometry

|    |           |           |           |
|----|-----------|-----------|-----------|
| C  | -1.333384 | -0.419893 | -0.225872 |
| C  | -3.144810 | 1.445888  | -0.027012 |
| C  | -0.159843 | 0.636886  | 0.245393  |
| C  | -2.692713 | 0.049082  | 0.406291  |
| H  | -3.956161 | 1.784324  | 0.628657  |
| H  | -2.589404 | 0.048308  | 1.498065  |
| C  | -2.018566 | 2.418259  | 0.037604  |
| H  | -2.315686 | 3.463971  | -0.021820 |
| C  | -0.712832 | 2.108980  | 0.161886  |
| O  | -3.638076 | 1.472850  | -1.362923 |
| H  | -3.887631 | 2.388644  | -1.568689 |
| Br | -4.201735 | -1.203507 | 0.157149  |
| C  | -1.070955 | -1.875569 | 0.231914  |
| H  | -1.758811 | -2.581789 | -0.246970 |
| H  | -1.203224 | -1.990515 | 1.312213  |
| H  | -0.079992 | -2.232350 | -0.038497 |
| C  | -1.431703 | -0.469482 | -1.774336 |
| H  | -2.331190 | -0.993762 | -2.112243 |
| H  | -0.584514 | -1.014984 | -2.205968 |
| H  | -1.441591 | 0.527386  | -2.224577 |
| C  | 0.256022  | 3.275865  | 0.237045  |
| H  | -0.252758 | 4.215592  | 0.481546  |
| H  | 0.753743  | 3.422638  | -0.726909 |
| H  | 1.015215  | 3.128459  | 1.009184  |
| C  | 0.255318  | 0.417569  | 1.742530  |
| H  | 0.654941  | 1.348394  | 2.162041  |
| H  | -0.626290 | 0.207562  | 2.358413  |
| C  | 1.127929  | 0.563277  | -0.653164 |
| H  | 1.709156  | 1.484908  | -0.545891 |
| H  | 0.860783  | 0.562127  | -1.715379 |
| C  | 1.305783  | -0.667530 | 2.025602  |
| H  | 1.601778  | -0.586860 | 3.081128  |
| H  | 0.850226  | -1.658077 | 1.947118  |
| C  | 2.103172  | -0.575307 | -0.349569 |
| H  | 1.674615  | -1.533935 | -0.644754 |
| C  | 2.554915  | -0.611634 | 1.124840  |
| Cl | 3.495889  | 0.866801  | 1.581517  |
| C  | 3.435918  | -1.832624 | 1.433278  |
| H  | 2.931948  | -2.761994 | 1.144366  |
| H  | 3.657580  | -1.900695 | 2.505022  |
| H  | 4.395761  | -1.798186 | 0.907929  |
| Br | 3.623178  | -0.420213 | -1.604720 |

SCF Energy (SMD/wB97XD/6-31+G\*\*) =  
-6264.2552897

SCF Energy (B3LYP/6-31G\*\*) =  
-6264.29112421

## 1i\_C003

## MMFF Geometry

|    |           |           |           |
|----|-----------|-----------|-----------|
| C  | 1.378547  | -0.646447 | 1.204367  |
| C  | 3.490650  | -0.900562 | -0.260316 |
| C  | 0.389536  | -1.013495 | -0.058054 |
| C  | 2.746916  | -0.022343 | 0.747896  |
| H  | 3.908461  | -1.774157 | 0.251977  |
| H  | 3.402341  | 0.138417  | 1.613946  |
| C  | 2.601975  | -1.397254 | -1.343588 |
| H  | 3.127712  | -1.768793 | -2.222698 |
| C  | 1.255873  | -1.455205 | -1.296684 |
| O  | 4.605578  | -0.238334 | -0.848554 |
| H  | 4.272542  | 0.610794  | -1.193844 |
| Br | 2.601243  | 1.821256  | 0.042926  |
| C  | 1.761234  | -1.943943 | 1.989942  |
| H  | 2.553217  | -1.743479 | 2.722105  |
| H  | 2.123258  | -2.739474 | 1.331351  |
| H  | 0.912300  | -2.338667 | 2.558548  |
| C  | 0.771351  | 0.284556  | 2.280587  |
| H  | 1.496029  | 0.469556  | 3.084163  |
| H  | -0.105809 | -0.151027 | 2.762019  |
| H  | 0.495123  | 1.265723  | 1.889367  |
| C  | 0.570309  | -2.029232 | -2.526290 |
| H  | 1.231207  | -2.023192 | -3.401190 |
| H  | -0.317636 | -1.464217 | -2.815128 |
| H  | 0.282207  | -3.070920 | -2.352984 |
| C  | -0.571324 | -2.217065 | 0.259532  |
| H  | -0.994745 | -2.613400 | -0.669072 |
| H  | -0.023515 | -3.071839 | 0.668940  |
| C  | -0.521387 | 0.187439  | -0.505630 |
| H  | -0.868545 | 0.024174  | -1.531497 |
| H  | 0.061936  | 1.105927  | -0.577783 |
| C  | -1.769519 | -1.905551 | 1.157333  |
| H  | -2.363787 | -2.822558 | 1.271945  |
| H  | -1.424302 | -1.661897 | 2.165842  |
| C  | -1.773701 | 0.460381  | 0.347004  |
| H  | -1.496517 | 0.901357  | 1.304899  |
| C  | -2.659449 | -0.772818 | 0.605347  |
| Cl | -3.451422 | -1.361150 | -0.912631 |
| C  | -3.773706 | -0.483784 | 1.623282  |
| H  | -3.357624 | -0.098735 | 2.561264  |
| H  | -4.335412 | -1.393947 | 1.864940  |
| H  | -4.494708 | 0.252365  | 1.253354  |
| Br | -2.762329 | 1.954348  | -0.488231 |

SCF Energy (SMD/wB97XD/6-31+G\*\*) =  
-6264.2596971

SCF Energy (B3LYP/6-31G\*\*) =  
-6264.29733199

## 1i\_C004

## MMFF Geometry

|    |           |           |           |
|----|-----------|-----------|-----------|
| C  | -1.338261 | -0.417905 | -0.222362 |
| C  | -3.147084 | 1.456433  | -0.023305 |
| C  | -0.160647 | 0.640648  | 0.234255  |
| C  | -2.696943 | 0.057353  | 0.408147  |
| H  | -3.935567 | 1.802689  | 0.655392  |
| H  | -2.590949 | 0.058544  | 1.499716  |
| C  | -2.015332 | 2.424874  | 0.019529  |
| H  | -2.317988 | 3.469748  | -0.044890 |
| C  | -0.709501 | 2.112857  | 0.130231  |
| O  | -3.697307 | 1.489609  | -1.338173 |
| H  | -3.062914 | 1.918317  | -1.935872 |
| Br | -4.205120 | -1.196427 | 0.164858  |
| C  | -1.075846 | -1.869016 | 0.250960  |
| H  | -1.764477 | -2.580184 | -0.219383 |
| H  | -1.206469 | -1.972156 | 1.332644  |
| H  | -0.085423 | -2.229112 | -0.016692 |
| C  | -1.439313 | -0.484882 | -1.769694 |
| H  | -2.347749 | -0.996878 | -2.101830 |
| H  | -0.601394 | -1.049766 | -2.194748 |
| H  | -1.430094 | 0.505431  | -2.232567 |
| C  | 0.262886  | 3.278257  | 0.183968  |
| H  | -0.242279 | 4.223204  | 0.415469  |
| H  | 0.757328  | 3.408581  | -0.784028 |
| H  | 1.024406  | 3.140251  | 0.955588  |
| C  | 0.252954  | 0.442382  | 1.734821  |
| H  | 0.652881  | 1.378962  | 2.141190  |
| H  | -0.629348 | 0.242142  | 2.352901  |
| C  | 1.127099  | 0.548694  | -0.663040 |
| H  | 1.708745  | 1.471933  | -0.573784 |
| H  | 0.859911  | 0.527082  | -1.724973 |
| C  | 1.302027  | -0.639419 | 2.034918  |
| H  | 1.595956  | -0.544523 | 3.089820  |
| H  | 0.845801  | -1.630609 | 1.968470  |
| C  | 2.102729  | -0.584445 | -0.338995 |
| H  | 1.675048  | -1.548123 | -0.618489 |
| C  | 2.552967  | -0.596367 | 1.136044  |
| Cl | 3.491158  | 0.890498  | 1.569006  |
| C  | 3.434924  | -1.811081 | 1.465460  |
| H  | 2.932363  | -2.745652 | 1.191251  |
| H  | 3.655405  | -1.861296 | 2.538430  |
| H  | 4.395335  | -1.784133 | 0.940705  |
| Br | 3.622957  | -0.449576 | -1.595934 |

SCF Energy (SMD/wB97XD/6-31+G\*\*) =  
-6264.2568555

SCF Energy (B3LYP/6-31G\*\*) =  
-6264.29287061

## 1i\_C005

## MMFF Geometry

|    |           |           |           |
|----|-----------|-----------|-----------|
| C  | -1.437998 | -0.534639 | -0.249062 |
| C  | -3.078615 | 1.476063  | -0.148664 |
| C  | -0.176399 | 0.499332  | -0.091832 |
| C  | -2.664863 | 0.126220  | 0.460320  |
| H  | -3.648510 | 2.053403  | 0.588567  |
| H  | -2.423274 | 0.280900  | 1.517838  |
| C  | -1.912078 | 2.284898  | -0.617714 |
| H  | -2.183734 | 3.258578  | -1.023894 |
| C  | -0.621217 | 1.888597  | -0.642580 |
| O  | -3.910975 | 1.328402  | -1.299322 |
| H  | -4.590808 | 0.668563  | -1.072455 |
| Br | -4.256650 | -1.032706 | 0.592928  |
| C  | -1.132064 | -1.917316 | 0.384531  |
| H  | -1.902623 | -2.654532 | 0.132219  |
| H  | -1.080805 | -1.875188 | 1.475876  |
| H  | -0.194183 | -2.337241 | 0.012123  |
| C  | -1.751273 | -0.812058 | -1.751134 |
| H  | -2.718235 | -1.309495 | -1.877151 |
| H  | -1.014301 | -1.482894 | -2.204335 |
| H  | -1.770642 | 0.096526  | -2.358629 |
| C  | 0.382219  | 2.841645  | -1.249097 |
| H  | -0.033957 | 3.847187  | -1.380717 |
| H  | 0.688476  | 2.493364  | -2.240609 |
| H  | 1.268044  | 2.956583  | -0.625539 |
| C  | 0.163355  | 0.717235  | 1.430637  |
| H  | -0.567828 | 1.388038  | 1.899760  |
| H  | 0.090348  | -0.224190 | 1.983262  |
| C  | 1.099288  | -0.060750 | -0.819950 |
| H  | 1.584255  | 0.696787  | -1.441144 |
| H  | 0.827466  | -0.840948 | -1.535092 |
| C  | 1.556787  | 1.287690  | 1.717329  |
| H  | 1.586277  | 2.326075  | 1.373126  |
| H  | 1.669876  | 1.362510  | 2.807258  |
| C  | 2.149968  | -0.620953 | 0.147528  |
| H  | 1.711903  | -1.441980 | 0.725381  |
| C  | 2.710807  | 0.443799  | 1.117288  |
| Cl | 3.838039  | 1.595102  | 0.288415  |
| C  | 3.504273  | -0.218860 | 2.256761  |
| H  | 2.873471  | -0.920677 | 2.814292  |
| H  | 3.875472  | 0.526189  | 2.970630  |
| H  | 4.373413  | -0.773885 | 1.888836  |
| Br | 3.538589  | -1.545666 | -0.895907 |

SCF Energy (SMD/wB97XD/6-31+G\*\*) =  
-6264.2534548

SCF Energy (B3LYP/6-31G\*\*) =  
-6264.29210537

## 1i\_C006

## MMFF Geometry

|    |           |           |           |
|----|-----------|-----------|-----------|
| C  | -1.533759 | 0.436843  | 1.334270  |
| C  | -3.441294 | 0.979985  | -0.305691 |
| C  | -0.398353 | 0.998135  | 0.293797  |
| C  | -2.828515 | -0.079460 | 0.618032  |
| H  | -3.960261 | 1.728605  | 0.303882  |
| H  | -3.584115 | -0.365034 | 1.361596  |
| C  | -2.426019 | 1.705617  | -1.119605 |
| H  | -2.844592 | 2.277555  | -1.947421 |
| C  | -1.097693 | 1.742684  | -0.887715 |
| O  | -4.434583 | 0.452914  | -1.178457 |
| H  | -4.038188 | -0.326248 | -1.610728 |
| Br | -2.614952 | -1.780987 | -0.356396 |
| C  | -2.023040 | 1.593599  | 2.275674  |
| H  | -2.910739 | 1.288898  | 2.843417  |
| H  | -2.282275 | 2.500804  | 1.721291  |
| H  | -1.268315 | 1.869419  | 3.019634  |
| C  | -0.995937 | -0.650618 | 2.298619  |
| H  | -1.787852 | -0.992059 | 2.976520  |
| H  | -0.186297 | -0.268314 | 2.928301  |
| H  | -0.617764 | -1.536304 | 1.783191  |
| C  | -0.268986 | 2.575118  | -1.841701 |
| H  | -0.838338 | 2.874806  | -2.729418 |
| H  | 0.600270  | 2.026845  | -2.210775 |
| H  | 0.060075  | 3.497518  | -1.354539 |
| C  | 0.553947  | 1.982654  | 1.074449  |
| H  | 0.079187  | 2.967817  | 1.170543  |
| H  | 0.702774  | 1.619800  | 2.098252  |
| C  | 0.484691  | -0.149668 | -0.313688 |
| H  | 0.691638  | 0.026757  | -1.375945 |
| H  | -0.051882 | -1.095444 | -0.311850 |
| C  | 1.964703  | 2.185699  | 0.503809  |
| H  | 1.900258  | 2.766052  | -0.419581 |
| H  | 2.509812  | 2.844938  | 1.193006  |
| C  | 1.817358  | -0.346006 | 0.416483  |
| H  | 1.626559  | -0.547929 | 1.475455  |
| C  | 2.756212  | 0.871714  | 0.287640  |
| Cl | 3.515467  | 0.980770  | -1.355698 |
| C  | 3.903485  | 0.786855  | 1.308403  |
| H  | 3.512694  | 0.742237  | 2.331429  |
| H  | 4.559305  | 1.663462  | 1.246372  |
| H  | 4.530282  | -0.097515 | 1.153590  |
| Br | 2.629542  | -2.035069 | -0.181557 |

SCF Energy (SMD/wB97XD/6-31+G\*\*) =  
-6264.2538368

SCF Energy (B3LYP/6-31G\*\*) =  
-6264.29102182

## 1i\_C007

## MMFF Geometry

|    |           |           |           |
|----|-----------|-----------|-----------|
| C  | 1.379590  | -0.611328 | 1.208896  |
| C  | 3.498630  | -0.877428 | -0.240289 |
| C  | 0.397283  | -0.997089 | -0.052775 |
| C  | 2.745841  | 0.017493  | 0.747317  |
| H  | 3.887762  | -1.753843 | 0.290344  |
| H  | 3.395649  | 0.194643  | 1.614529  |
| C  | 2.616686  | -1.373197 | -1.334356 |
| H  | 3.130661  | -1.740034 | -2.220524 |
| C  | 1.269946  | -1.437576 | -1.288876 |
| O  | 4.646979  | -0.228920 | -0.776748 |
| H  | 5.011834  | -0.788862 | -1.480748 |
| Br | 2.578350  | 1.850878  | 0.024822  |
| C  | 1.766735  | -1.897581 | 2.011033  |
| H  | 2.557002  | -1.684579 | 2.741487  |
| H  | 2.132163  | -2.700405 | 1.363384  |
| H  | 0.918758  | -2.289010 | 2.583325  |
| C  | 0.763080  | 0.326834  | 2.274094  |
| H  | 1.485310  | 0.527026  | 3.076229  |
| H  | -0.110767 | -0.111205 | 2.759553  |
| H  | 0.478157  | 1.301107  | 1.872085  |
| C  | 0.587131  | -2.012291 | -2.520376 |
| H  | 1.250007  | -2.007072 | -3.393785 |
| H  | -0.300131 | -1.448566 | -2.813084 |
| H  | 0.299191  | -3.054035 | -2.347252 |
| C  | -0.550140 | -2.209503 | 0.270778  |
| H  | -0.969518 | -2.614755 | -0.655800 |
| H  | 0.007076  | -3.056338 | 0.683976  |
| C  | -0.528145 | 0.191117  | -0.507316 |
| H  | -0.873948 | 0.018278  | -1.531789 |
| H  | 0.044064  | 1.116075  | -0.585094 |
| C  | -1.750499 | -1.906100 | 1.168513  |
| H  | -2.333753 | -2.829235 | 1.290231  |
| H  | -1.406799 | -1.651307 | 2.174803  |
| C  | -1.783989 | 0.454703  | 0.343002  |
| H  | -1.512882 | 0.906712  | 1.297477  |
| C  | -2.654327 | -0.787619 | 0.610331  |
| Cl | -3.441136 | -1.396457 | -0.902613 |
| C  | -3.770924 | -0.505421 | 1.627686  |
| H  | -3.358505 | -0.109213 | 2.562635  |
| H  | -4.321303 | -1.420702 | 1.875990  |
| H  | -4.501198 | 0.219495  | 1.253791  |
| Br | -2.792828 | 1.929032  | -0.503661 |

SCF Energy (SMD/wB97XD/6-31+G\*\*) =  
-6264.2556294

SCF Energy (B3LYP/6-31G\*\*) =  
-6264.28888645

## 1i\_C008

## MMFF Geometry

|    |           |           |           |
|----|-----------|-----------|-----------|
| C  | 1.576772  | -0.306969 | 0.619464  |
| C  | 2.828584  | 1.306595  | -0.982382 |
| C  | 0.125054  | 0.137740  | -0.035266 |
| C  | 2.672493  | -0.132605 | -0.482022 |
| H  | 3.331231  | 1.306187  | -1.956706 |
| H  | 2.419830  | -0.772625 | -1.335908 |
| C  | 1.517988  | 2.004814  | -1.103679 |
| H  | 1.594644  | 2.999402  | -1.542054 |
| C  | 0.315459  | 1.544706  | -0.695367 |
| O  | 3.609768  | 2.118978  | -0.107639 |
| H  | 4.411898  | 1.609422  | 0.106658  |
| Br | 4.456522  | -0.813976 | 0.023385  |
| C  | 1.581839  | -1.785861 | 1.106377  |
| H  | 2.452021  | -1.994294 | 1.739615  |
| H  | 1.621689  | -2.496457 | 0.275352  |
| H  | 0.714229  | -2.036197 | 1.718815  |
| C  | 1.886874  | 0.562628  | 1.873258  |
| H  | 2.911390  | 0.411546  | 2.228055  |
| H  | 1.232943  | 0.303238  | 2.712866  |
| H  | 1.757082  | 1.632674  | 1.690375  |
| C  | -0.852375 | 2.470073  | -0.907656 |
| H  | -0.577844 | 3.361311  | -1.484929 |
| H  | -1.226314 | 2.836005  | 0.050989  |
| H  | -1.646637 | 1.986271  | -1.474683 |
| C  | -0.253457 | -0.836269 | -1.199064 |
| H  | 0.260880  | -0.544600 | -2.124974 |
| H  | 0.111023  | -1.845150 | -0.994503 |
| C  | -0.971758 | 0.137771  | 1.106791  |
| H  | -0.961187 | 1.106861  | 1.622726  |
| H  | -0.651854 | -0.563815 | 1.882650  |
| C  | -1.741442 | -0.962679 | -1.523798 |
| H  | -2.111129 | -0.031302 | -1.962926 |
| H  | -1.850493 | -1.720163 | -2.312157 |
| C  | -2.425074 | -0.306446 | 0.812636  |
| H  | -2.833457 | -0.725832 | 1.742470  |
| C  | -2.578859 | -1.356036 | -0.304360 |
| Cl | -4.294432 | -1.568667 | -0.848487 |
| C  | -2.164845 | -2.742636 | 0.227982  |
| H  | -1.154685 | -2.746228 | 0.641449  |
| H  | -2.196374 | -3.500191 | -0.563991 |
| H  | -2.833547 | -3.074548 | 1.031498  |
| Br | -3.592283 | 1.265549  | 0.619964  |

SCF Energy (SMD/wB97XD/6-31+G\*\*) =  
-6264.2462078

SCF Energy (B3LYP/6-31G\*\*) =  
-6264.28497702

## 1i\_C009

## MMFF Geometry

|    |           |           |           |
|----|-----------|-----------|-----------|
| C  | -1.442787 | -0.537962 | -0.261582 |
| C  | -3.093973 | 1.461941  | -0.167538 |
| C  | -0.183615 | 0.495836  | -0.078060 |
| C  | -2.677487 | 0.113965  | 0.443432  |
| H  | -3.703363 | 2.015220  | 0.556730  |
| H  | -2.433764 | 0.276567  | 1.499326  |
| C  | -1.919171 | 2.294787  | -0.582087 |
| H  | -2.173662 | 3.288270  | -0.947649 |
| C  | -0.626831 | 1.901729  | -0.593471 |
| O  | -3.882705 | 1.289304  | -1.344551 |
| H  | -4.188568 | 2.166435  | -1.627781 |
| Br | -4.249916 | -1.063389 | 0.604065  |
| C  | -1.140185 | -1.929893 | 0.353662  |
| H  | -1.901810 | -2.666788 | 0.074264  |
| H  | -1.108881 | -1.907053 | 1.446354  |
| H  | -0.193805 | -2.338307 | -0.009591 |
| C  | -1.741748 | -0.795742 | -1.769609 |
| H  | -2.718617 | -1.269276 | -1.911649 |
| H  | -1.014328 | -1.480168 | -2.218389 |
| H  | -1.729664 | 0.118498  | -2.368998 |
| C  | 0.386739  | 2.878864  | -1.143781 |
| H  | -0.028999 | 3.888052  | -1.245680 |
| H  | 0.712766  | 2.569191  | -2.141740 |
| H  | 1.260035  | 2.972638  | -0.500268 |
| C  | 0.154027  | 0.673584  | 1.450455  |
| H  | -0.577094 | 1.333331  | 1.935063  |
| H  | 0.077128  | -0.281810 | 1.977727  |
| C  | 1.093135  | -0.043772 | -0.819152 |
| H  | 1.575440  | 0.729955  | -1.422232 |
| H  | 0.822813  | -0.806585 | -1.553361 |
| C  | 1.547700  | 1.230656  | 1.761645  |
| H  | 1.578794  | 2.282963  | 1.463355  |
| H  | 1.657701  | 1.259695  | 2.854170  |
| C  | 2.145727  | -0.626537 | 0.132936  |
| H  | 1.711661  | -1.464773 | 0.688428  |
| C  | 2.703983  | 0.412639  | 1.131104  |
| Cl | 3.819661  | 1.595257  | 0.330145  |
| C  | 3.508190  | -0.276900 | 2.246940  |
| H  | 2.885779  | -1.000345 | 2.785957  |
| H  | 3.876273  | 0.449805  | 2.981062  |
| H  | 4.380425  | -0.813268 | 1.859243  |
| Br | 3.537885  | -1.515903 | -0.937201 |

SCF Energy (SMD/wB97XD/6-31+G\*\*) =  
-6264.2497497

SCF Energy (B3LYP/6-31G\*\*) =  
-6264.28430699

## 1i\_C010

## MMFF Geometry

|    |           |           |           |
|----|-----------|-----------|-----------|
| C  | 1.707084  | 1.432624  | 0.387259  |
| C  | 3.040848  | -0.619516 | 1.220626  |
| C  | 0.280706  | 0.662736  | 0.675989  |
| C  | 2.884456  | 0.434709  | 0.116061  |
| H  | 3.670238  | -0.177986 | 2.004104  |
| H  | 3.828858  | 0.991582  | 0.050155  |
| C  | 1.772628  | -1.015186 | 1.899508  |
| H  | 1.913903  | -1.773219 | 2.670229  |
| C  | 0.556936  | -0.450709 | 1.736601  |
| O  | 3.722830  | -1.797490 | 0.812806  |
| H  | 3.297337  | -2.094098 | -0.012401 |
| Br | 2.855561  | -0.406716 | -1.668166 |
| C  | 2.120245  | 2.266378  | 1.650763  |
| H  | 3.130690  | 2.676725  | 1.533533  |
| H  | 2.115428  | 1.676923  | 2.571837  |
| H  | 1.454461  | 3.121621  | 1.809121  |
| C  | 1.646886  | 2.489771  | -0.753056 |
| H  | 2.629127  | 2.960865  | -0.886510 |
| H  | 0.946262  | 3.299842  | -0.531574 |
| H  | 1.367085  | 2.081752  | -1.725365 |
| C  | -0.507398 | -0.871019 | 2.725094  |
| H  | -1.401755 | -1.248068 | 2.240756  |
| H  | -0.783111 | -0.035294 | 3.375081  |
| H  | -0.163805 | -1.673543 | 3.388627  |
| C  | -0.751245 | 1.712401  | 1.211438  |
| H  | -0.556154 | 1.931815  | 2.268944  |
| H  | -0.608855 | 2.670197  | 0.703668  |
| C  | -0.264019 | -0.017471 | -0.637738 |
| H  | 0.223355  | -0.989724 | -0.776496 |
| H  | 0.049814  | 0.585601  | -1.491833 |
| C  | -2.237626 | 1.369710  | 1.064571  |
| H  | -2.516174 | 0.571592  | 1.757835  |
| H  | -2.817654 | 2.244904  | 1.388639  |
| C  | -1.777425 | -0.192003 | -0.861878 |
| H  | -1.941133 | -0.316694 | -1.940968 |
| C  | -2.625275 | 0.990916  | -0.367526 |
| Cl | -4.398871 | 0.632933  | -0.400159 |
| C  | -2.439846 | 2.192948  | -1.317169 |
| H  | -1.392108 | 2.490220  | -1.416341 |
| H  | -2.995007 | 3.069738  | -0.963420 |
| H  | -2.798526 | 1.958496  | -2.326698 |
| Br | -2.344013 | -1.956738 | -0.214518 |

SCF Energy (PCM/mPW1PW91/6-31+G\*\*) =  
-6264.2489265

SCF Energy (B3LYP/6-31G\*\*) =  
-6264.28691829

## 1i\_C011

## MMFF Geometry

|    |           |           |           |
|----|-----------|-----------|-----------|
| C  | 1.578078  | 0.305286  | -0.619716 |
| C  | 2.807556  | -1.292835 | 1.019553  |
| C  | 0.133533  | -0.048826 | 0.085231  |
| C  | 2.703547  | 0.127989  | 0.454016  |
| H  | 3.365800  | -1.272330 | 1.963073  |
| H  | 2.523562  | 0.812993  | 1.289132  |
| C  | 1.466234  | -1.897827 | 1.257181  |
| H  | 1.498539  | -2.851630 | 1.782158  |
| C  | 0.278277  | -1.391376 | 0.866842  |
| O  | 3.488872  | -2.193804 | 0.149526  |
| H  | 4.309800  | -1.748481 | -0.127081 |
| Br | 4.497094  | 0.698155  | -0.146167 |
| C  | 1.594445  | 1.763839  | -1.156097 |
| H  | 2.463543  | 1.947835  | -1.797262 |
| H  | 1.631358  | 2.498167  | -0.345424 |
| H  | 0.719209  | 1.992113  | -1.769959 |
| C  | 1.835485  | -0.625912 | -1.842357 |
| H  | 2.865809  | -0.550659 | -2.203339 |
| H  | 1.203141  | -0.361782 | -2.696436 |
| H  | 1.640924  | -1.677970 | -1.615650 |
| C  | -0.957815 | -2.182274 | 1.222410  |
| H  | -0.732246 | -3.023455 | 1.888286  |
| H  | -1.418037 | -2.609107 | 0.328678  |
| H  | -1.682156 | -1.563609 | 1.749397  |
| C  | -0.243206 | 1.042968  | 1.140578  |
| H  | -0.582232 | 0.576275  | 2.073795  |
| H  | 0.633505  | 1.617545  | 1.452399  |
| C  | -0.966716 | -0.177940 | -1.032993 |
| H  | -0.992197 | -1.206850 | -1.414626 |
| H  | -0.618157 | 0.391909  | -1.901417 |
| C  | -1.301518 | 2.050836  | 0.689574  |
| H  | -1.452580 | 2.783025  | 1.494172  |
| H  | -0.925910 | 2.623945  | -0.166353 |
| C  | -2.390990 | 0.376464  | -0.819676 |
| H  | -2.616119 | 0.907453  | -1.756560 |
| C  | -2.633153 | 1.381344  | 0.325976  |
| Cl | -3.322548 | 0.648713  | 1.828549  |
| C  | -3.636398 | 2.463076  | -0.114691 |
| H  | -3.272393 | 3.004755  | -0.995455 |
| H  | -3.799375 | 3.205467  | 0.675584  |
| H  | -4.609717 | 2.029949  | -0.371120 |
| Br | -3.730977 | -1.051644 | -0.958762 |

SCF Energy (SMD/wB97XD/6-31+G\*\*) =  
-6264.2458515

SCF Energy (B3LYP/6-31G\*\*) =  
-6264.28484945

## 1i\_C012

## MMFF Geometry

|    |           |           |           |
|----|-----------|-----------|-----------|
| C  | -1.534440 | 0.398518  | 1.335945  |
| C  | -3.451986 | 0.955124  | -0.286204 |
| C  | -0.405538 | 0.980657  | 0.300515  |
| C  | -2.826432 | -0.119267 | 0.612782  |
| H  | -3.947558 | 1.699459  | 0.348406  |
| H  | -3.576563 | -0.423042 | 1.354860  |
| C  | -2.441414 | 1.688619  | -1.106317 |
| H  | -2.847247 | 2.267214  | -1.933921 |
| C  | -1.112355 | 1.730419  | -0.874583 |
| O  | -4.485001 | 0.431033  | -1.113451 |
| H  | -4.739438 | 1.112305  | -1.756104 |
| Br | -2.590168 | -1.807193 | -0.377142 |
| C  | -2.030266 | 1.539331  | 2.293687  |
| H  | -2.918431 | 1.223019  | 2.854276  |
| H  | -2.290294 | 2.454478  | 1.752948  |
| H  | -1.278458 | 1.806240  | 3.043896  |
| C  | -0.986532 | -0.696013 | 2.287070  |
| H  | -1.775076 | -1.052010 | 2.961409  |
| H  | -0.179704 | -0.314100 | 2.920655  |
| H  | -0.600756 | -1.572457 | 1.761682  |
| C  | -0.286508 | 2.570438  | -1.825196 |
| H  | -0.855286 | 2.868051  | -2.713965 |
| H  | 0.587866  | 2.030125  | -2.193564 |
| H  | 0.034295  | 3.494156  | -1.334996 |
| C  | 0.536480  | 1.967757  | 1.090618  |
| H  | 0.051504  | 2.946997  | 1.195716  |
| H  | 0.689015  | 1.596691  | 2.110933  |
| C  | 0.490400  | -0.152628 | -0.317029 |
| H  | 0.695402  | 0.034476  | -1.377704 |
| H  | -0.035326 | -1.104359 | -0.323389 |
| C  | 1.945074  | 2.191128  | 0.522881  |
| H  | 1.874975  | 2.779204  | -0.395161 |
| H  | 2.482655  | 2.849955  | 1.218371  |
| C  | 1.825057  | -0.341390 | 0.411327  |
| H  | 1.636078  | -0.556138 | 1.468103  |
| C  | 2.750701  | 0.887794  | 0.295535  |
| Cl | 3.511978  | 1.022003  | -1.345154 |
| C  | 3.897167  | 0.805611  | 1.317565  |
| H  | 3.505153  | 0.746858  | 2.339411  |
| H  | 4.543489  | 1.689875  | 1.265207  |
| H  | 4.533892  | -0.070300 | 1.155369  |
| Br | 2.657875  | -2.014681 | -0.202824 |

SCF Energy (SMD/wB97XD/6-31+G\*\*) =  
-6264.2496697

SCF Energy (B3LYP/6-31G\*\*) =  
-6264.28237928

**1j\_C001****MMFF Geometry**

|    |           |           |           |
|----|-----------|-----------|-----------|
| C  | -1.439536 | -0.349983 | -0.461804 |
| C  | -3.041528 | 1.397212  | 0.599846  |
| C  | -0.156329 | 0.384113  | 0.255562  |
| C  | -2.696786 | -0.086282 | 0.426723  |
| H  | -3.682789 | 1.525812  | 1.479726  |
| H  | -2.525157 | -0.519661 | 1.419269  |
| C  | -1.827819 | 2.251934  | 0.745019  |
| H  | -2.053615 | 3.297479  | 0.951665  |
| C  | -0.544938 | 1.861230  | 0.590026  |
| O  | -3.747877 | 1.938093  | -0.515926 |
| H  | -4.448563 | 1.299339  | -0.740459 |
| Br | -4.322341 | -1.043118 | -0.159665 |
| C  | -1.235244 | -1.887536 | -0.603438 |
| H  | -1.945395 | -2.320713 | -1.317454 |
| H  | -1.386841 | -2.411333 | 0.346028  |
| H  | -0.242525 | -2.153602 | -0.972085 |
| C  | -1.632312 | 0.198792  | -1.904004 |
| H  | -2.568841 | -0.149426 | -2.350903 |
| H  | -0.831422 | -0.143601 | -2.568900 |
| H  | -1.635867 | 1.291500  | -1.943792 |
| C  | 0.505936  | 2.938309  | 0.709153  |
| H  | 0.073179  | 3.914164  | 0.959748  |
| H  | 1.032421  | 3.074382  | -0.239728 |
| H  | 1.223005  | 2.715827  | 1.499915  |
| C  | 0.171946  | -0.331466 | 1.608929  |
| H  | -0.552258 | -0.038253 | 2.380165  |
| H  | 0.054102  | -1.412752 | 1.507035  |
| C  | 1.080996  | 0.314271  | -0.706397 |
| H  | 0.963845  | 1.060327  | -1.504682 |
| H  | 1.088226  | -0.647182 | -1.227993 |
| C  | 1.572695  | -0.102008 | 2.182938  |
| H  | 1.647250  | 0.922516  | 2.562144  |
| H  | 1.691187  | -0.742598 | 3.067795  |
| C  | 2.466323  | 0.493394  | -0.066765 |
| H  | 2.633096  | 1.541925  | 0.190144  |
| C  | 2.708227  | -0.376518 | 1.179191  |
| Cl | 2.700118  | -2.139954 | 0.778473  |
| C  | 4.049044  | -0.061339 | 1.860828  |
| H  | 4.907554  | -0.325266 | 1.234879  |
| H  | 4.154641  | -0.614393 | 2.801774  |
| H  | 4.126537  | 1.005629  | 2.099058  |
| Br | 3.821633  | 0.209964  | -1.475615 |

**SCF Energy (SMD/wB97XD/6-31+G\*\*) =**  
**-6264.2642846**

**SCF Energy (B3LYP/6-31G\*\*) =**  
**-6264.30169961**

**1j\_C002****MMFF Geometry**

|    |           |           |           |
|----|-----------|-----------|-----------|
| C  | -1.441464 | -0.342646 | -0.476013 |
| C  | -3.053740 | 1.397013  | 0.578092  |
| C  | -0.163198 | 0.378880  | 0.263386  |
| C  | -2.705753 | -0.085852 | 0.404843  |
| H  | -3.730577 | 1.512636  | 1.433046  |
| H  | -2.530013 | -0.513425 | 1.399398  |
| C  | -1.837577 | 2.243021  | 0.779621  |
| H  | -2.051714 | 3.280487  | 1.031142  |
| C  | -0.554119 | 1.848893  | 0.634983  |
| O  | -3.716446 | 1.930760  | -0.566817 |
| H  | -4.014963 | 2.827631  | -0.344467 |
| Br | -4.315151 | -1.073761 | -0.165413 |
| C  | -1.235977 | -1.878047 | -0.639297 |
| H  | -1.934088 | -2.298738 | -1.372496 |
| H  | -1.403600 | -2.417404 | 0.298734  |
| H  | -0.236896 | -2.138013 | -0.995302 |
| C  | -1.621115 | 0.225340  | -1.912183 |
| H  | -2.563994 | -0.100566 | -2.362888 |
| H  | -0.825551 | -0.124351 | -2.579795 |
| H  | -1.602250 | 1.318336  | -1.939766 |
| C  | 0.501887  | 2.913798  | 0.809944  |
| H  | 0.071568  | 3.882569  | 1.090435  |
| H  | 1.041985  | 3.081609  | -0.126136 |
| H  | 1.206676  | 2.658398  | 1.601385  |
| C  | 0.162561  | -0.369786 | 1.600507  |
| H  | -0.559955 | -0.090361 | 2.378438  |
| H  | 0.038555  | -1.447699 | 1.474615  |
| C  | 1.076615  | 0.335384  | -0.696896 |
| H  | 0.962040  | 1.104870  | -1.473077 |
| H  | 1.083474  | -0.610540 | -1.246511 |
| C  | 1.564643  | -0.165510 | 2.180848  |
| H  | 1.644616  | 0.845636  | 2.592912  |
| H  | 1.679637  | -0.834013 | 3.045351  |
| C  | 2.460667  | 0.493468  | -0.049425 |
| H  | 2.627531  | 1.533459  | 0.240165  |
| C  | 2.699542  | -0.414038 | 1.169856  |
| Cl | 2.686772  | -2.164286 | 0.717128  |
| C  | 4.040911  | -0.123247 | 1.861402  |
| H  | 4.899124  | -0.371850 | 1.228803  |
| H  | 4.143837  | -0.703724 | 2.785994  |
| H  | 4.121807  | 0.936091  | 2.130562  |
| Br | 3.818749  | 0.253067  | -1.463306 |

**SCF Energy (SMD/wB97XD/6-31+G\*\*) =**  
**-6264.2605934**

**SCF Energy (B3LYP/6-31G\*\*) =**  
**-6264.29368623**



## 1j\_C003

## MMFF Geometry

|    |           |           |           |
|----|-----------|-----------|-----------|
| C  | -1.605688 | 0.969793  | 1.063373  |
| C  | -3.353883 | 0.626594  | -0.794095 |
| C  | -0.388921 | 1.082203  | -0.034765 |
| C  | -2.811804 | 0.118620  | 0.547800  |
| H  | -4.012624 | 1.480485  | -0.593309 |
| H  | -3.631170 | 0.148111  | 1.278169  |
| C  | -2.305327 | 1.119995  | -1.734125 |
| H  | -2.687524 | 1.355885  | -2.727285 |
| C  | -1.009468 | 1.361564  | -1.442608 |
| O  | -4.165422 | -0.319939 | -1.478953 |
| H  | -3.685731 | -1.168414 | -1.452233 |
| Br | -2.470022 | -1.822556 | 0.469970  |
| C  | -2.182845 | 2.398543  | 1.360142  |
| H  | -3.104646 | 2.333503  | 1.951014  |
| H  | -2.417571 | 2.956675  | 0.449004  |
| H  | -1.485122 | 3.007822  | 1.944792  |
| C  | -1.155572 | 0.444999  | 2.456152  |
| H  | -1.997505 | 0.460157  | 3.159825  |
| H  | -0.368941 | 1.063714  | 2.897044  |
| H  | -0.787049 | -0.582269 | 2.443121  |
| C  | -0.176993 | 1.969843  | -2.546577 |
| H  | -0.734604 | 2.055559  | -3.486894 |
| H  | 0.701472  | 1.367886  | -2.774628 |
| H  | 0.131145  | 2.985272  | -2.282362 |
| C  | 0.564592  | 2.248357  | 0.407080  |
| H  | 0.116681  | 3.216041  | 0.144978  |
| H  | 0.649983  | 2.260752  | 1.497779  |
| C  | 0.422438  | -0.254980 | -0.126429 |
| H  | -0.115366 | -0.965061 | -0.765467 |
| H  | 0.478177  | -0.723833 | 0.858220  |
| C  | 2.002509  | 2.242756  | -0.126380 |
| H  | 2.011150  | 2.544628  | -1.178347 |
| H  | 2.564618  | 3.029132  | 0.396369  |
| C  | 1.856688  | -0.174472 | -0.664446 |
| H  | 1.841228  | -0.005207 | -1.743919 |
| C  | 2.723685  | 0.893149  | 0.020554  |
| Cl | 2.945922  | 0.554599  | 1.782289  |
| C  | 4.119693  | 1.013084  | -0.610588 |
| H  | 4.728268  | 0.117026  | -0.451783 |
| H  | 4.674896  | 1.857855  | -0.185669 |
| H  | 4.048579  | 1.179792  | -1.691488 |
| Br | 2.645157  | -1.983286 | -0.550106 |

SCF Energy (SMD/wB97XD/6-31+G\*\*) =  
-6264.2580378

SCF Energy (B3LYP/6-31G\*\*) =  
-6264.29746189

## 1j\_C004

## MMFF Geometry

|    |           |           |           |
|----|-----------|-----------|-----------|
| C  | -1.431363 | -0.307890 | -0.409031 |
| C  | -3.092154 | 1.402080  | 0.626501  |
| C  | -0.182013 | 0.405338  | 0.366822  |
| C  | -2.729227 | -0.074412 | 0.431422  |
| H  | -3.795085 | 1.498950  | 1.462468  |
| H  | -2.605045 | -0.530718 | 1.419564  |
| C  | -1.890733 | 2.241233  | 0.897946  |
| H  | -2.124356 | 3.266278  | 1.182512  |
| C  | -0.603768 | 1.850119  | 0.798746  |
| O  | -3.716886 | 1.983847  | -0.515054 |
| H  | -4.408432 | 1.361444  | -0.804063 |
| Br | -4.324741 | -1.020114 | -0.249533 |
| C  | -1.202922 | -1.830317 | -0.585185 |
| H  | -1.929634 | -2.272209 | -1.275950 |
| H  | -1.299507 | -2.364578 | 0.365275  |
| H  | -0.221204 | -2.056509 | -1.009077 |
| C  | -1.582712 | 0.284993  | -1.841034 |
| H  | -2.511933 | -0.037506 | -2.320902 |
| H  | -0.773686 | -0.045452 | -2.501456 |
| H  | -1.570477 | 1.378566  | -1.845900 |
| C  | 0.455540  | 2.877448  | 1.134885  |
| H  | 0.019813  | 3.838647  | 1.431571  |
| H  | 1.096882  | 3.082689  | 0.273597  |
| H  | 1.071100  | 2.546194  | 1.975377  |
| C  | 0.214354  | -0.332739 | 1.696769  |
| H  | 0.608965  | 0.383477  | 2.429509  |
| H  | -0.666638 | -0.762833 | 2.183416  |
| C  | 1.067561  | 0.455132  | -0.582836 |
| H  | 1.022600  | 1.356617  | -1.207952 |
| H  | 1.051431  | -0.376364 | -1.294831 |
| C  | 1.273201  | -1.433973 | 1.558239  |
| H  | 1.476129  | -1.837542 | 2.559313  |
| H  | 0.833419  | -2.274152 | 1.014431  |
| C  | 2.399171  | 0.379950  | 0.169180  |
| H  | 2.461688  | 1.188203  | 0.901744  |
| C  | 2.595398  | -0.972162 | 0.891597  |
| Cl | 3.087296  | -2.297854 | -0.245206 |
| C  | 3.700204  | -0.858720 | 1.955183  |
| H  | 4.666197  | -0.586114 | 1.517264  |
| H  | 3.840876  | -1.805811 | 2.489462  |
| H  | 3.446647  | -0.097059 | 2.701398  |
| Br | 3.856687  | 0.843601  | -1.065126 |

SCF Energy (SMD/wB97XD/6-31+G\*\*) =  
-6264.2565690

SCF Energy (B3LYP/6-31G\*\*) =  
-6264.29470353

## 1j\_C005

## MMFF Geometry

|    |           |           |           |
|----|-----------|-----------|-----------|
| C  | -1.604911 | 0.934224  | 1.083075  |
| C  | -3.365410 | 0.614995  | -0.766653 |
| C  | -0.395073 | 1.071116  | -0.019039 |
| C  | -2.806495 | 0.079595  | 0.558833  |
| H  | -4.009672 | 1.472622  | -0.534296 |
| H  | -3.620304 | 0.090291  | 1.296169  |
| C  | -2.322038 | 1.125449  | -1.710597 |
| H  | -2.694804 | 1.384757  | -2.699998 |
| C  | -1.025306 | 1.367884  | -1.420202 |
| O  | -4.215614 | -0.318198 | -1.422542 |
| H  | -4.418965 | 0.018492  | -2.309505 |
| Br | -2.441101 | -1.855015 | 0.461220  |
| C  | -2.190894 | 2.354360  | 1.404271  |
| H  | -3.111680 | 2.273491  | 1.994739  |
| H  | -2.429358 | 2.926884  | 0.503121  |
| H  | -1.496414 | 2.958153  | 1.998473  |
| C  | -1.143846 | 0.394116  | 2.466840  |
| H  | -1.983454 | 0.390010  | 3.173447  |
| H  | -0.362598 | 1.015199  | 2.914002  |
| H  | -0.763528 | -0.628465 | 2.438514  |
| C  | -0.197046 | 1.993258  | -2.518262 |
| H  | -0.755918 | 2.087538  | -3.456984 |
| H  | 0.683776  | 1.398236  | -2.754869 |
| H  | 0.106398  | 3.007002  | -2.242467 |
| C  | 0.551090  | 2.238842  | 0.435251  |
| H  | 0.094594  | 3.206432  | 0.187996  |
| H  | 0.640408  | 2.237216  | 1.525682  |
| C  | 0.427261  | -0.258063 | -0.133660 |
| H  | -0.106143 | -0.961945 | -0.783174 |
| H  | 0.488840  | -0.741929 | 0.843290  |
| C  | 1.987098  | 2.252169  | -0.102890 |
| H  | 1.990069  | 2.567840  | -1.150796 |
| H  | 2.544374  | 3.036310  | 0.428346  |
| C  | 1.859874  | -0.158883 | -0.672529 |
| H  | 1.841069  | 0.024356  | -1.749661 |
| C  | 2.719764  | 0.906846  | 0.024280  |
| Cl | 2.950869  | 0.547890  | 1.780729  |
| C  | 4.112833  | 1.047177  | -0.609440 |
| H  | 4.729787  | 0.154592  | -0.463979 |
| H  | 4.661927  | 1.891276  | -0.175331 |
| H  | 4.036967  | 1.227156  | -1.687889 |
| Br | 2.665483  | -1.961630 | -0.584149 |

SCF Energy (SMD/wB97XD/6-31+G\*\*) =  
-6264.2547215

SCF Energy (B3LYP/6-31G\*\*) =  
-6264.28849581

## 1j\_C006

## MMFF Geometry

|    |           |           |           |
|----|-----------|-----------|-----------|
| C  | -1.435653 | -0.309680 | -0.420703 |
| C  | -3.099759 | 1.413596  | 0.582886  |
| C  | -0.189777 | 0.398983  | 0.365142  |
| C  | -2.738473 | -0.066478 | 0.410160  |
| H  | -3.835597 | 1.513895  | 1.389778  |
| H  | -2.609663 | -0.501348 | 1.407587  |
| C  | -1.896933 | 2.241903  | 0.898418  |
| H  | -2.119564 | 3.259203  | 1.215773  |
| C  | -0.611421 | 1.841621  | 0.813327  |
| O  | -3.678869 | 1.973661  | -0.592606 |
| H  | -3.920190 | 2.893478  | -0.395980 |
| Br | -4.321726 | -1.049766 | -0.236583 |
| C  | -1.209324 | -1.832568 | -0.595793 |
| H  | -1.931167 | -2.272485 | -1.292963 |
| H  | -1.313560 | -2.367655 | 0.353363  |
| H  | -0.224868 | -2.059135 | -1.013406 |
| C  | -1.574389 | 0.280441  | -1.854674 |
| H  | -2.512229 | -0.022690 | -2.330784 |
| H  | -0.773994 | -0.071470 | -2.514678 |
| H  | -1.534812 | 1.373412  | -1.863961 |
| C  | 0.451335  | 2.853212  | 1.186754  |
| H  | 0.018950  | 3.811886  | 1.496213  |
| H  | 1.105924  | 3.070501  | 0.338392  |
| H  | 1.052765  | 2.501207  | 2.028898  |
| C  | 0.203159  | -0.355323 | 1.688139  |
| H  | 0.592924  | 0.351701  | 2.431954  |
| H  | -0.679135 | -0.792955 | 2.165755  |
| C  | 1.062641  | 0.459489  | -0.579756 |
| H  | 1.019348  | 1.368635  | -1.193883 |
| H  | 1.048364  | -0.364110 | -1.301018 |
| C  | 1.264877  | -1.453369 | 1.542208  |
| H  | 1.466405  | -1.864368 | 2.540579  |
| H  | 0.828280  | -2.290677 | 0.991567  |
| C  | 2.392249  | 0.375612  | 0.174972  |
| H  | 2.452614  | 1.174847  | 0.917453  |
| C  | 2.587752  | -0.984319 | 0.882225  |
| Cl | 3.082428  | -2.296246 | -0.268841 |
| C  | 3.691046  | -0.882633 | 1.948704  |
| H  | 4.657698  | -0.605067 | 1.515384  |
| H  | 3.831024  | -1.835645 | 2.472550  |
| H  | 3.436289  | -0.129404 | 2.703034  |
| Br | 3.852866  | 0.856115  | -1.049203 |

SCF Energy (SMD/wB97XD/6-31+G\*\*) =  
-6264.2529937

SCF Energy (B3LYP/6-31G\*\*) =  
-6264.28680997

## 1k\_C001

## MMFF Geometry

|    |           |           |           |
|----|-----------|-----------|-----------|
| C  | -1.278515 | -0.369078 | -0.397395 |
| C  | -3.224195 | 1.310826  | -0.067690 |
| C  | -0.199033 | 0.721311  | 0.198186  |
| C  | -2.676961 | -0.079683 | 0.251296  |
| H  | -3.653191 | 1.363968  | -1.075365 |
| H  | -2.638534 | -0.229468 | 1.336430  |
| C  | -2.179606 | 2.360593  | 0.054954  |
| H  | -2.566302 | 3.379006  | 0.042099  |
| C  | -0.854919 | 2.149719  | 0.178779  |
| O  | -4.257668 | 1.657356  | 0.854312  |
| H  | -4.948342 | 0.976099  | 0.765999  |
| Br | -4.094192 | -1.374549 | -0.266983 |
| C  | -0.910396 | -1.839530 | -0.091403 |
| H  | -1.533836 | -2.540613 | -0.657850 |
| H  | -1.052633 | -2.079583 | 0.966663  |
| H  | 0.109023  | -2.089114 | -0.373538 |
| C  | -1.365050 | -0.250563 | -1.945486 |
| H  | -2.193023 | -0.834083 | -2.359427 |
| H  | -0.459763 | -0.641715 | -2.422943 |
| H  | -1.498987 | 0.782900  | -2.278708 |
| C  | 0.014199  | 3.382874  | 0.337082  |
| H  | -0.574730 | 4.271306  | 0.593162  |
| H  | 0.537963  | 3.606166  | -0.597851 |
| H  | 0.748640  | 3.260575  | 1.137208  |
| C  | 0.164487  | 0.433877  | 1.695710  |
| H  | 0.492749  | 1.358674  | 2.185685  |
| H  | -0.727025 | 0.134482  | 2.257601  |
| C  | 1.130773  | 0.794392  | -0.638224 |
| H  | 1.635636  | 1.746840  | -0.446879 |
| H  | 0.912931  | 0.839515  | -1.710516 |
| C  | 1.265661  | -0.604064 | 1.954562  |
| H  | 1.496310  | -0.594021 | 3.028952  |
| H  | 0.880399  | -1.608954 | 1.763736  |
| C  | 2.180528  | -0.282595 | -0.353345 |
| H  | 1.850684  | -1.248194 | -0.738196 |
| C  | 2.552875  | -0.375731 | 1.139471  |
| Cl | 3.610660  | -1.820834 | 1.418037  |
| C  | 3.305255  | 0.847861  | 1.691593  |
| H  | 3.467216  | 0.753743  | 2.772321  |
| H  | 2.753948  | 1.778657  | 1.531885  |
| H  | 4.293253  | 0.969044  | 1.235756  |
| Br | 3.745538  | 0.092802  | -1.502899 |

SCF Energy (SMD/wB97XD/6-31+G\*\*) =  
-6264.2619414

SCF Energy (B3LYP/6-31G\*\*) =  
-6264.29891747

## 1k\_C002

## MMFF Geometry

|    |           |           |           |
|----|-----------|-----------|-----------|
| C  | 1.438407  | 0.328109  | -0.676417 |
| C  | 2.757433  | -1.552549 | 0.496351  |
| C  | 0.026224  | -0.235169 | -0.036383 |
| C  | 2.590949  | -0.044033 | 0.307721  |
| H  | 3.347241  | -1.999629 | -0.313153 |
| H  | 2.443371  | 0.445507  | 1.277848  |
| C  | 1.454129  | -2.272471 | 0.561759  |
| H  | 1.546746  | -3.327474 | 0.816912  |
| C  | 0.234784  | -1.744103 | 0.322837  |
| O  | 3.441577  | -1.825665 | 1.718531  |
| H  | 4.305513  | -1.380104 | 1.658686  |
| Br | 4.360927  | 0.671017  | -0.228482 |
| C  | 1.423394  | 1.872046  | -0.876749 |
| H  | 2.240246  | 2.197440  | -1.531307 |
| H  | 1.545742  | 2.413030  | 0.066646  |
| H  | 0.508207  | 2.233317  | -1.348607 |
| C  | 1.679615  | -0.299646 | -2.082713 |
| H  | 2.660278  | -0.028272 | -2.486221 |
| H  | 0.945633  | 0.054364  | -2.813952 |
| H  | 1.624873  | -1.391713 | -2.074892 |
| C  | -0.935986 | -2.680529 | 0.452278  |
| H  | -0.641169 | -3.663809 | 0.838237  |
| H  | -1.388223 | -2.862682 | -0.525039 |
| H  | -1.675958 | -2.296754 | 1.154041  |
| C  | -0.262834 | 0.492461  | 1.317280  |
| H  | 0.278294  | 0.002135  | 2.138472  |
| H  | 0.141412  | 1.506777  | 1.304854  |
| C  | -1.133246 | -0.022341 | -1.090476 |
| H  | -1.180415 | -0.888966 | -1.763007 |
| H  | -0.841565 | 0.793765  | -1.757971 |
| C  | -1.727661 | 0.603233  | 1.738275  |
| H  | -2.106689 | -0.380890 | 2.031019  |
| H  | -1.774398 | 1.213155  | 2.650893  |
| C  | -2.550571 | 0.387578  | -0.633798 |
| H  | -3.003858 | 0.967443  | -1.449925 |
| C  | -2.625304 | 1.214121  | 0.658701  |
| Cl | -2.021812 | 2.891276  | 0.269894  |
| C  | -4.046208 | 1.417565  | 1.207789  |
| H  | -4.053952 | 2.142257  | 2.031317  |
| H  | -4.467711 | 0.491780  | 1.612772  |
| H  | -4.724775 | 1.791301  | 0.432467  |
| Br | -3.756053 | -1.167131 | -0.636811 |

SCF Energy (SMD/wB97XD/6-31+G\*\*) =  
-6264.2522965

SCF Energy (B3LYP/6-31G\*\*) =  
-6264.29307080

## 1k\_C003

## MMFF Geometry

|    |           |           |           |
|----|-----------|-----------|-----------|
| C  | -1.290030 | -0.374462 | -0.409284 |
| C  | -3.237426 | 1.308716  | -0.061675 |
| C  | -0.207863 | 0.722689  | 0.167748  |
| C  | -2.687885 | -0.086033 | 0.246417  |
| H  | -3.707181 | 1.346118  | -1.051169 |
| H  | -2.640515 | -0.240140 | 1.330444  |
| C  | -2.186304 | 2.360478  | 0.001507  |
| H  | -2.569836 | 3.379035  | -0.058374 |
| C  | -0.860999 | 2.151340  | 0.114752  |
| O  | -4.237740 | 1.673995  | 0.890749  |
| H  | -3.806916 | 1.751650  | 1.758806  |
| Br | -4.094076 | -1.394933 | -0.263448 |
| C  | -0.913417 | -1.840896 | -0.093277 |
| H  | -1.535197 | -2.549752 | -0.651766 |
| H  | -1.050139 | -2.073272 | 0.967135  |
| H  | 0.105602  | -2.088055 | -0.377659 |
| C  | -1.387422 | -0.269051 | -1.958154 |
| H  | -2.215642 | -0.858868 | -2.362346 |
| H  | -0.484420 | -0.661414 | -2.438755 |
| H  | -1.527553 | 0.760860  | -2.299454 |
| C  | 0.013502  | 3.386777  | 0.214445  |
| H  | -0.569986 | 4.286651  | 0.441398  |
| H  | 0.528505  | 3.571523  | -0.733634 |
| H  | 0.754290  | 3.291976  | 1.012737  |
| C  | 0.149061  | 0.470622  | 1.672449  |
| H  | 0.479312  | 1.406890  | 2.139443  |
| H  | -0.745049 | 0.188702  | 2.238993  |
| C  | 1.126701  | 0.770706  | -0.665007 |
| H  | 1.631409  | 1.727561  | -0.497623 |
| H  | 0.913839  | 0.786181  | -1.739013 |
| C  | 1.244977  | -0.565018 | 1.959678  |
| H  | 1.467516  | -0.534830 | 3.035380  |
| H  | 0.858506  | -1.572283 | 1.784342  |
| C  | 2.177851  | -0.296471 | -0.346997 |
| H  | 1.855759  | -1.271886 | -0.712641 |
| C  | 2.538864  | -0.354965 | 1.150206  |
| Cl | 3.594398  | -1.792500 | 1.470802  |
| C  | 3.286559  | 0.881432  | 1.679762  |
| H  | 3.436747  | 0.814179  | 2.764183  |
| H  | 2.738195  | 1.808449  | 1.490654  |
| H  | 4.279598  | 0.990351  | 1.231805  |
| Br | 3.751314  | 0.058526  | -1.491921 |

SCF Energy (SMD/wB97XD/6-31+G\*\*) =  
-6264.2594237

SCF Energy (B3LYP/6-31G\*\*) =  
-6264.29375653

## 1k\_C004

## MMFF Geometry

|    |          |          |          |
|----|----------|----------|----------|
| C  | -1.28680 | -0.37780 | -0.40366 |
| C  | -3.23749 | 1.29594  | -0.02856 |
| C  | -0.20554 | 0.71876  | 0.17262  |
| C  | -2.68052 | -0.09797 | 0.26413  |
| H  | -3.72813 | 1.33376  | -1.00865 |
| H  | -2.63110 | -0.26591 | 1.34604  |
| C  | -2.18950 | 2.35174  | 0.02738  |
| H  | -2.56730 | 3.37208  | -0.01183 |
| C  | -0.86179 | 2.14598  | 0.12354  |
| O  | -4.21090 | 1.63089  | 0.96133  |
| H  | -4.72893 | 2.37695  | 0.61582  |
| Br | -4.08928 | -1.40428 | -0.26467 |
| C  | -0.90432 | -1.84507 | -0.09906 |
| H  | -1.52783 | -2.55216 | -0.65782 |
| H  | -1.03389 | -2.08449 | 0.96065  |
| H  | 0.11345  | -2.08778 | -0.39146 |
| C  | -1.39347 | -0.26271 | -1.95146 |
| H  | -2.22027 | -0.85431 | -2.35570 |
| H  | -0.49122 | -0.64730 | -2.43963 |
| H  | -1.54096 | 0.76860  | -2.28531 |
| C  | 0.01123  | 3.38224  | 0.22513  |
| H  | -0.57210 | 4.28070  | 0.45790  |
| H  | 0.52197  | 3.57146  | -0.72440 |
| H  | 0.75555  | 3.28544  | 1.01985  |
| C  | 0.15502  | 0.46421  | 1.67631  |
| H  | 0.48436  | 1.40013  | 2.14460  |
| H  | -0.73717 | 0.17947  | 2.24437  |
| C  | 1.12724  | 0.77091  | -0.66267 |
| H  | 1.62970  | 1.72901  | -0.49574 |
| H  | 0.91246  | 0.78648  | -1.73626 |
| C  | 1.25329  | -0.57003 | 1.95921  |
| H  | 1.47694  | -0.54289 | 3.03475  |
| H  | 0.86905  | -1.57757 | 1.78057  |
| C  | 2.18215  | -0.29336 | -0.34743 |
| H  | 1.86317  | -1.26924 | -0.71444 |
| C  | 2.54541  | -0.35380 | 1.14904  |
| Cl | 3.60681  | -1.78855 | 1.46442  |
| C  | 3.28994  | 0.88382  | 1.68008  |
| H  | 3.44129  | 0.81508  | 2.76424  |
| H  | 2.73881  | 1.80958  | 1.49300  |
| H  | 4.28224  | 0.99641  | 1.23137  |
| Br | 3.75306  | 0.06878  | -1.49434 |

SCF Energy (SMD/wB97XD/6-31+G\*\*) =  
-6264.2586026

SCF Energy (B3LYP/6-31G\*\*) =  
-6264.29245023

## 1k\_C005

## MMFF Geometry

|    |           |           |           |
|----|-----------|-----------|-----------|
| C  | -1.362023 | -0.604427 | -0.377798 |
| C  | -3.154675 | 1.259784  | -0.386394 |
| C  | -0.199222 | 0.545419  | -0.359281 |
| C  | -2.615244 | 0.009472  | 0.324209  |
| H  | -3.862442 | 0.989967  | -1.180154 |
| H  | -2.397475 | 0.233531  | 1.374742  |
| C  | -2.091864 | 2.104219  | -1.014209 |
| H  | -2.466546 | 3.002772  | -1.502267 |
| C  | -0.775046 | 1.810550  | -1.066144 |
| O  | -3.854362 | 2.090853  | 0.537287  |
| H  | -4.593547 | 1.560934  | 0.885238  |
| Br | -4.128090 | -1.253626 | 0.518591  |
| C  | -0.914232 | -1.897044 | 0.350950  |
| H  | -1.655880 | -2.696833 | 0.249061  |
| H  | -0.761175 | -1.744461 | 1.422191  |
| H  | 0.006561  | -2.302998 | -0.076466 |
| C  | -1.704837 | -1.035727 | -1.837927 |
| H  | -2.556945 | -1.722583 | -1.865792 |
| H  | -0.878248 | -1.575353 | -2.309618 |
| H  | -1.952592 | -0.193655 | -2.489197 |
| C  | 0.119813  | 2.753986  | -1.833863 |
| H  | -0.393682 | 3.686057  | -2.096586 |
| H  | 0.439311  | 2.292456  | -2.773865 |
| H  | 1.003835  | 3.039629  | -1.262646 |
| C  | 0.121152  | 0.975020  | 1.124300  |
| H  | -0.644958 | 1.663720  | 1.503233  |
| H  | 0.098335  | 0.113559  | 1.798007  |
| C  | 1.128002  | 0.035507  | -1.029862 |
| H  | 1.590528  | 0.801036  | -1.658907 |
| H  | 0.922092  | -0.783913 | -1.722895 |
| C  | 1.481860  | 1.652106  | 1.301832  |
| H  | 1.488267  | 2.579979  | 0.722579  |
| H  | 1.580063  | 1.981839  | 2.344518  |
| C  | 2.184927  | -0.408329 | -0.009613 |
| H  | 1.771002  | -1.213535 | 0.605643  |
| C  | 2.671881  | 0.748478  | 0.894068  |
| Cl | 3.362572  | 0.019309  | 2.406743  |
| C  | 3.763451  | 1.645394  | 0.287616  |
| H  | 3.978406  | 2.498395  | 0.943113  |
| H  | 3.450648  | 2.050061  | -0.681008 |
| H  | 4.711699  | 1.118114  | 0.141852  |
| Br | 3.638668  | -1.317809 | -0.969762 |

SCF Energy (SMD/wB97XD/6-31+G\*\*) =  
-6264.2586734

SCF Energy (B3LYP/6-31G\*\*) =  
-6264.29508213

## 1k\_C006

## MMFF Geometry

|    |           |           |           |
|----|-----------|-----------|-----------|
| C  | 1.450420  | 0.323168  | -0.678173 |
| C  | 2.756568  | -1.552615 | 0.531507  |
| C  | 0.035252  | -0.236582 | -0.042541 |
| C  | 2.604227  | -0.044515 | 0.309933  |
| H  | 3.381630  | -2.006307 | -0.246406 |
| H  | 2.460760  | 0.465668  | 1.270004  |
| C  | 1.452763  | -2.278741 | 0.554545  |
| H  | 1.545009  | -3.341220 | 0.779695  |
| C  | 0.237192  | -1.748499 | 0.305050  |
| O  | 3.395526  | -1.810767 | 1.782415  |
| H  | 2.781676  | -1.542394 | 2.487066  |
| Br | 4.370691  | 0.661753  | -0.248183 |
| C  | 1.435714  | 1.867736  | -0.880695 |
| H  | 2.255116  | 2.193085  | -1.531971 |
| H  | 1.553353  | 2.409333  | 0.062975  |
| H  | 0.523293  | 2.230092  | -1.356742 |
| C  | 1.694529  | -0.307915 | -2.082453 |
| H  | 2.667184  | -0.020952 | -2.494359 |
| H  | 0.949913  | 0.028523  | -2.811113 |
| H  | 1.660954  | -1.400715 | -2.068143 |
| C  | -0.934668 | -2.688440 | 0.396084  |
| H  | -0.644185 | -3.680078 | 0.763525  |
| H  | -1.374940 | -2.848832 | -0.590439 |
| H  | -1.682636 | -2.319973 | 1.097928  |
| C  | -0.250646 | 0.481720  | 1.315924  |
| H  | 0.291315  | -0.014387 | 2.133096  |
| H  | 0.154258  | 1.495916  | 1.309544  |
| C  | -1.123918 | -0.010395 | -1.095537 |
| H  | -1.174528 | -0.870814 | -1.775614 |
| H  | -0.829415 | 0.808923  | -1.757459 |
| C  | -1.715500 | 0.587955  | 1.738018  |
| H  | -2.094884 | -0.400315 | 2.016682  |
| H  | -1.762239 | 1.185760  | 2.658573  |
| C  | -2.539960 | 0.401585  | -0.635901 |
| H  | -2.990301 | 0.991823  | -1.446166 |
| C  | -2.611874 | 1.214200  | 0.665616  |
| Cl | -2.002550 | 2.893082  | 0.295542  |
| C  | -4.031780 | 1.416281  | 1.217658  |
| H  | -4.036754 | 2.132105  | 2.048931  |
| H  | -4.456017 | 0.487584  | 1.612998  |
| H  | -4.709549 | 1.800526  | 0.446792  |
| Br | -3.751827 | -1.148303 | -0.654879 |

SCF Energy (SMD/wB97XD/6-31+G\*\*) =  
-6264.2505502

SCF Energy (B3LYP/6-31G\*\*) =  
-6264.28803081

## 1k\_C007

## MMFF Geometry

|    |           |           |           |
|----|-----------|-----------|-----------|
| C  | 1.445737  | 0.335885  | -0.672589 |
| C  | 2.757486  | -1.533552 | 0.542312  |
| C  | 0.033271  | -0.231068 | -0.040726 |
| C  | 2.598368  | -0.027415 | 0.318277  |
| H  | 3.397343  | -1.982195 | -0.227363 |
| H  | 2.456900  | 0.486121  | 1.276926  |
| C  | 1.457616  | -2.268374 | 0.556814  |
| H  | 1.541991  | -3.329258 | 0.786207  |
| C  | 0.240677  | -1.744049 | 0.298877  |
| O  | 3.380799  | -1.758085 | 1.807086  |
| H  | 3.637563  | -2.694495 | 1.841312  |
| Br | 4.366952  | 0.677118  | -0.250541 |
| C  | 1.425257  | 1.880860  | -0.872243 |
| H  | 2.245046  | 2.210841  | -1.520665 |
| H  | 1.538410  | 2.421119  | 0.072744  |
| H  | 0.512684  | 2.240802  | -1.349806 |
| C  | 1.694630  | -0.292036 | -2.077519 |
| H  | 2.663044  | 0.005920  | -2.491506 |
| H  | 0.945116  | 0.036285  | -2.804831 |
| H  | 1.673580  | -1.385151 | -2.063484 |
| C  | -0.928808 | -2.687208 | 0.385349  |
| H  | -0.636743 | -3.679419 | 0.749910  |
| H  | -1.366988 | -2.845685 | -0.602430 |
| H  | -1.678932 | -2.322985 | 1.087043  |
| C  | -0.255543 | 0.480868  | 1.320561  |
| H  | 0.289051  | -0.015672 | 2.135668  |
| H  | 0.144424  | 1.497069  | 1.317522  |
| C  | -1.126663 | -0.004636 | -1.092721 |
| H  | -1.173996 | -0.862136 | -1.776708 |
| H  | -0.835535 | 0.818654  | -1.751145 |
| C  | -1.720380 | 0.578830  | 1.743891  |
| H  | -2.095177 | -0.412225 | 2.018829  |
| H  | -1.769318 | 1.172769  | 2.666828  |
| C  | -2.544176 | 0.399455  | -0.630935 |
| H  | -2.996193 | 0.992523  | -1.438238 |
| C  | -2.620012 | 1.205144  | 0.674607  |
| Cl | -2.020885 | 2.889420  | 0.311087  |
| C  | -4.040865 | 1.396835  | 1.228026  |
| H  | -4.049441 | 2.108552  | 2.062789  |
| H  | -4.459879 | 0.463884  | 1.618921  |
| H  | -4.720998 | 1.781169  | 0.459284  |
| Br | -3.751319 | -1.154237 | -0.661027 |

SCF Energy (SMD/wB97XD/6-31+G\*\*) =  
-6264.2496857

SCF Energy (B3LYP/6-31G\*\*) =  
-6264.28692394

## 1k\_C008

## MMFF Geometry

|    |           |           |           |
|----|-----------|-----------|-----------|
| C  | 1.599483  | 0.722083  | 1.137623  |
| C  | 2.480784  | -1.483642 | -0.022546 |
| C  | 0.119526  | 0.081687  | 0.919514  |
| C  | 2.676769  | 0.027671  | 0.228204  |
| H  | 2.329350  | -1.723950 | -1.081204 |
| H  | 3.669232  | 0.199792  | 0.665967  |
| C  | 1.352843  | -2.105014 | 0.732614  |
| H  | 1.458720  | -3.171390 | 0.925308  |
| C  | 0.276187  | -1.438772 | 1.198669  |
| O  | 3.667770  | -2.177665 | 0.375313  |
| H  | 4.362919  | -1.932063 | -0.259802 |
| Br | 2.935274  | 0.892907  | -1.539433 |
| C  | 2.071563  | 0.485986  | 2.615964  |
| H  | 3.064140  | 0.924310  | 2.779533  |
| H  | 2.150551  | -0.572677 | 2.878219  |
| H  | 1.399134  | 0.958853  | 3.338762  |
| C  | 1.646620  | 2.269626  | 0.987221  |
| H  | 2.682842  | 2.629231  | 1.015670  |
| H  | 1.133464  | 2.778492  | 1.809988  |
| H  | 1.199213  | 2.632675  | 0.060033  |
| C  | -0.686202 | -2.199871 | 2.076630  |
| H  | -0.345116 | -3.225170 | 2.263533  |
| H  | -1.672889 | -2.286955 | 1.623871  |
| H  | -0.780125 | -1.729341 | 3.059136  |
| C  | -0.905800 | 0.775454  | 1.874389  |
| H  | -0.738857 | 0.469743  | 2.913449  |
| H  | -0.738773 | 1.855887  | 1.873193  |
| C  | -0.347887 | 0.294189  | -0.567870 |
| H  | 0.206771  | -0.366976 | -1.243680 |
| H  | -0.071597 | 1.306986  | -0.874797 |
| C  | -2.392652 | 0.572273  | 1.551527  |
| H  | -2.694444 | -0.451649 | 1.783921  |
| H  | -2.978907 | 1.198653  | 2.238201  |
| C  | -1.845595 | 0.172350  | -0.890636 |
| H  | -2.008110 | 0.575783  | -1.899030 |
| C  | -2.763647 | 0.904593  | 0.100917  |
| Cl | -2.519367 | 2.697849  | -0.148087 |
| C  | -4.261272 | 0.660883  | -0.135868 |
| H  | -4.875082 | 1.316925  | 0.493319  |
| H  | -4.554879 | -0.364643 | 0.110329  |
| H  | -4.535966 | 0.850131  | -1.179858 |
| Br | -2.315240 | -1.714386 | -1.163916 |

SCF Energy (SMD/wB97XD/6-31+G\*\*) =  
-6264.2559863

SCF Energy (B3LYP/6-31G\*\*) =  
-6264.29286899

**1k\_C009****MMFF Geometry**

|    |           |           |           |
|----|-----------|-----------|-----------|
| C  | -1.619311 | -0.734639 | 1.119465  |
| C  | -2.584496 | 1.447361  | -0.003007 |
| C  | -0.148160 | -0.067949 | 0.910770  |
| C  | -2.699793 | -0.080011 | 0.186950  |
| H  | -2.547024 | 1.730997  | -1.060731 |
| H  | -3.695520 | -0.324058 | 0.581449  |
| C  | -1.428435 | 2.094843  | 0.691980  |
| H  | -1.529408 | 3.164675  | 0.864338  |
| C  | -0.331761 | 1.456485  | 1.150718  |
| O  | -3.773561 | 2.044651  | 0.528920  |
| H  | -3.795884 | 2.965410  | 0.217751  |
| Br | -2.839963 | -0.914148 | -1.609160 |
| C  | -2.113693 | -0.490283 | 2.588593  |
| H  | -3.106444 | -0.931999 | 2.741143  |
| H  | -2.199635 | 0.569534  | 2.843400  |
| H  | -1.449398 | -0.955338 | 3.324030  |
| C  | -1.636705 | -2.284672 | 0.983676  |
| H  | -2.667167 | -2.661345 | 0.998892  |
| H  | -1.127541 | -2.776889 | 1.818850  |
| H  | -1.170119 | -2.649785 | 0.066973  |
| C  | 0.635108  | 2.257139  | 1.989589  |
| H  | 0.743116  | 1.822640  | 2.987236  |
| H  | 0.288534  | 3.285942  | 2.144352  |
| H  | 1.616381  | 2.336318  | 1.525209  |
| C  | 0.870675  | -0.721230 | 1.900982  |
| H  | 0.683828  | -0.385327 | 2.927473  |
| H  | 0.714672  | -1.802831 | 1.931214  |
| C  | 0.350739  | -0.297885 | -0.563089 |
| H  | -0.193570 | 0.355658  | -1.255112 |
| H  | 0.084765  | -1.315470 | -0.862071 |
| C  | 2.360611  | -0.513117 | 1.596172  |
| H  | 2.650501  | 0.518979  | 1.806553  |
| H  | 2.940870  | -1.116029 | 2.308519  |
| C  | 1.853030  | -0.179725 | -0.864033 |
| H  | 2.032854  | -0.611483 | -1.857752 |
| C  | 2.758076  | -0.880344 | 0.161299  |
| Cl | 2.528496  | -2.680705 | -0.045174 |
| C  | 4.258128  | -0.633482 | -0.056111 |
| H  | 4.864833  | -1.269235 | 0.600217  |
| H  | 4.541385  | 0.399880  | 0.168557  |
| H  | 4.551929  | -0.847856 | -1.089994 |
| Br | 2.320763  | 1.699218  | -1.189629 |

**SCF Energy (SMD/wB97XD/6-31+G\*\*) =**  
**-6264.2537305**

**SCF Energy (B3LYP/6-31G\*\*) =**  
**-6264.29030984**

**1k\_C010****MMFF Geometry**

|    |           |           |           |
|----|-----------|-----------|-----------|
| C  | 1.635351  | 0.727439  | 1.091821  |
| C  | 2.640090  | -1.447588 | 0.000557  |
| C  | 0.166181  | 0.047591  | 0.897647  |
| C  | 2.714338  | 0.086211  | 0.147759  |
| H  | 2.659997  | -1.764517 | -1.047325 |
| H  | 3.709848  | 0.363783  | 0.520105  |
| C  | 1.467268  | -2.104209 | 0.655964  |
| H  | 1.571673  | -3.180800 | 0.788996  |
| C  | 0.362576  | -1.479860 | 1.113187  |
| O  | 3.811347  | -2.021081 | 0.597706  |
| H  | 3.723848  | -1.930389 | 1.561963  |
| Br | 2.799996  | 0.887745  | -1.661419 |
| C  | 2.141516  | 0.488733  | 2.557652  |
| H  | 3.144073  | 0.912454  | 2.695429  |
| H  | 2.206118  | -0.569311 | 2.824621  |
| H  | 1.493962  | 0.974663  | 3.294860  |
| C  | 1.640737  | 2.277906  | 0.953528  |
| H  | 2.668785  | 2.661315  | 0.968257  |
| H  | 1.127559  | 2.768718  | 1.786832  |
| H  | 1.173812  | 2.639408  | 0.035752  |
| C  | -0.613783 | -2.307175 | 1.914824  |
| H  | -0.270320 | -3.341301 | 2.037875  |
| H  | -1.591477 | -2.368672 | 1.441619  |
| H  | -0.729399 | -1.905781 | 2.925536  |
| C  | -0.838868 | 0.675245  | 1.917979  |
| H  | -0.638089 | 0.310655  | 2.932261  |
| H  | -0.680394 | 1.755175  | 1.977005  |
| C  | -0.358340 | 0.291183  | -0.565155 |
| H  | 0.168642  | -0.363806 | -1.269386 |
| H  | -0.088295 | 1.307672  | -0.863033 |
| C  | -2.333203 | 0.477767  | 1.628841  |
| H  | -2.623057 | -0.558430 | 1.818627  |
| H  | -2.901851 | 1.065020  | 2.363301  |
| C  | -1.866268 | 0.193993  | -0.844648 |
| H  | -2.056726 | 0.649871  | -1.825604 |
| C  | -2.749045 | 0.880488  | 0.208888  |
| Cl | -2.504731 | 2.682717  | 0.038719  |
| C  | -4.254505 | 0.652472  | 0.009287  |
| H  | -4.561856 | 0.891958  | -1.015099 |
| H  | -4.845007 | 1.279540  | 0.688354  |
| H  | -4.544302 | -0.382810 | 0.216085  |
| Br | -2.358630 | -1.670977 | -1.207886 |

**SCF Energy (SMD/wB97XD/6-31+G\*\*) =**  
**-6264.2545869**

**SCF Energy (B3LYP/6-31G\*\*) =**  
**-6264.29198209**

## 1k\_C011

## MMFF Geometry

|    |           |           |           |
|----|-----------|-----------|-----------|
| C  | -1.369061 | -0.619645 | -0.363994 |
| C  | -3.144930 | 1.272627  | -0.331922 |
| C  | -0.206925 | 0.527324  | -0.377948 |
| C  | -2.613633 | 0.000509  | 0.351890  |
| H  | -3.922246 | 1.022699  | -1.064489 |
| H  | -2.387594 | 0.201327  | 1.405628  |
| C  | -2.097946 | 2.077325  | -1.041876 |
| H  | -2.472731 | 2.952350  | -1.569681 |
| C  | -0.786550 | 1.767314  | -1.122580 |
| O  | -3.739696 | 2.119918  | 0.650325  |
| H  | -4.175979 | 2.849739  | 0.180142  |
| Br | -4.130855 | -1.265691 | 0.528248  |
| C  | -0.906796 | -1.901041 | 0.376720  |
| H  | -1.652959 | -2.700144 | 0.310440  |
| H  | -0.724494 | -1.727975 | 1.440296  |
| H  | 0.001765  | -2.318221 | -0.066235 |
| C  | -1.733753 | -1.070676 | -1.813179 |
| H  | -2.543517 | -1.807618 | -1.814381 |
| H  | -0.893931 | -1.559653 | -2.314765 |
| H  | -2.055364 | -0.245325 | -2.453439 |
| C  | 0.097734  | 2.661127  | -1.958254 |
| H  | -0.416667 | 3.579372  | -2.264172 |
| H  | 0.399063  | 2.146116  | -2.876175 |
| H  | 0.991869  | 2.973818  | -1.416593 |
| C  | 0.114550  | 1.002486  | 1.091298  |
| H  | -0.653693 | 1.697840  | 1.453069  |
| H  | 0.099352  | 0.161124  | 1.790485  |
| C  | 1.122023  | -0.003183 | -1.031521 |
| H  | 1.584808  | 0.741322  | -1.684925 |
| H  | 0.918014  | -0.845758 | -1.696796 |
| C  | 1.471772  | 1.693674  | 1.237503  |
| H  | 1.472603  | 2.594151  | 0.615703  |
| H  | 1.571059  | 2.069310  | 2.264355  |
| C  | 2.179390  | -0.411651 | 0.003352  |
| H  | 1.766087  | -1.196865 | 0.644629  |
| C  | 2.663841  | 0.776789  | 0.866841  |
| Cl | 3.350528  | 0.102974  | 2.406211  |
| C  | 3.756319  | 1.652789  | 0.232056  |
| H  | 3.968105  | 2.529035  | 0.857224  |
| H  | 3.446169  | 2.022132  | -0.751436 |
| H  | 4.705646  | 1.121807  | 0.108357  |
| Br | 3.635342  | -1.349312 | -0.925841 |

SCF Energy (SMD/wB97XD/6-31+G\*\*) =  
-6264.2561634

SCF Energy (B3LYP/6-31G\*\*) =  
-6264.28942400

## 1k\_C012

## MMFF Geometry

|    |           |           |           |
|----|-----------|-----------|-----------|
| C  | -1.372273 | -0.613773 | -0.368444 |
| C  | -3.154020 | 1.270174  | -0.370987 |
| C  | -0.208321 | 0.533533  | -0.379769 |
| C  | -2.622951 | 0.009849  | 0.334988  |
| H  | -3.904404 | 1.004389  | -1.124952 |
| H  | -2.399414 | 0.229988  | 1.385251  |
| C  | -2.098803 | 2.080048  | -1.060211 |
| H  | -2.480681 | 2.952264  | -1.590091 |
| C  | -0.785068 | 1.777293  | -1.121432 |
| O  | -3.797682 | 2.131799  | 0.567101  |
| H  | -3.107189 | 2.531202  | 1.122871  |
| Br | -4.131913 | -1.257506 | 0.532479  |
| C  | -0.915744 | -1.892997 | 0.379346  |
| H  | -1.659903 | -2.693437 | 0.306407  |
| H  | -0.744590 | -1.718089 | 1.444442  |
| H  | -0.002644 | -2.309927 | -0.054201 |
| C  | -1.727107 | -1.070644 | -1.818234 |
| H  | -2.554691 | -1.787430 | -1.823955 |
| H  | -0.891906 | -1.585324 | -2.301860 |
| H  | -2.018153 | -0.244304 | -2.471670 |
| C  | 0.102898  | 2.678108  | -1.946344 |
| H  | -0.411584 | 3.597293  | -2.249404 |
| H  | 0.410777  | 2.169418  | -2.865617 |
| H  | 0.993244  | 2.989266  | -1.397868 |
| C  | 0.112403  | 1.005188  | 1.090404  |
| H  | -0.653567 | 1.703500  | 1.451209  |
| H  | 0.092086  | 0.163263  | 1.788630  |
| C  | 1.120618  | 0.003812  | -1.034019 |
| H  | 1.586382  | 0.751921  | -1.681267 |
| H  | 0.915457  | -0.833429 | -1.705609 |
| C  | 1.472665  | 1.689736  | 1.240619  |
| H  | 1.479661  | 2.591192  | 0.620547  |
| H  | 1.571211  | 2.063518  | 2.268254  |
| C  | 2.175518  | -0.413692 | -0.000070 |
| H  | 1.759040  | -1.201082 | 0.636218  |
| C  | 2.661786  | 0.768033  | 0.871661  |
| Cl | 3.334262  | 0.083386  | 2.412342  |
| C  | 3.762595  | 1.641206  | 0.247760  |
| H  | 4.709908  | 1.105852  | 0.127500  |
| H  | 3.975046  | 2.513480  | 0.878231  |
| H  | 3.460213  | 2.016623  | -0.735882 |
| Br | 3.629899  | -1.350418 | -0.931491 |

SCF Energy (SMD/wB97XD/6-31+G\*\*) =  
-6264.2571214

SCF Energy (B3LYP/6-31G\*\*) =  
-6264.29015652



## 1k\_C013

## MMFF Geometry

|    |           |           |           |
|----|-----------|-----------|-----------|
| C  | -1.432373 | -0.594076 | -1.041005 |
| C  | -3.582269 | -0.375273 | 0.429251  |
| C  | -0.516882 | -0.963733 | 0.267449  |
| C  | -2.726992 | 0.229136  | -0.683836 |
| H  | -4.238323 | 0.383842  | 0.870858  |
| H  | -3.346452 | 0.320154  | -1.586523 |
| C  | -2.777679 | -1.000556 | 1.514763  |
| H  | -3.350123 | -1.249265 | 2.407281  |
| C  | -1.455009 | -1.255570 | 1.493496  |
| O  | -4.449648 | -1.372940 | -0.110456 |
| H  | -4.906825 | -1.799070 | 0.633818  |
| Br | -2.405635 | 2.127220  | -0.243327 |
| C  | -1.942618 | -1.908585 | -1.718947 |
| H  | -2.704702 | -1.694885 | -2.478316 |
| H  | -2.383691 | -2.605114 | -0.999738 |
| H  | -1.134442 | -2.434064 | -2.239811 |
| C  | -0.701017 | 0.157041  | -2.180753 |
| H  | -1.385326 | 0.345500  | -3.018364 |
| H  | 0.129484  | -0.413741 | -2.597007 |
| H  | -0.321168 | 1.133135  | -1.874397 |
| C  | -0.873813 | -1.881500 | 2.750141  |
| H  | -1.539024 | -1.761386 | 3.613300  |
| H  | 0.078789  | -1.430523 | 3.036160  |
| H  | -0.726422 | -2.956994 | 2.608624  |
| C  | 0.357162  | -2.255877 | 0.053454  |
| H  | 0.719221  | -2.630571 | 1.016405  |
| H  | -0.240930 | -3.087834 | -0.331426 |
| C  | 0.466655  | 0.185741  | 0.687827  |
| H  | 0.756909  | 0.053086  | 1.736559  |
| H  | -0.046000 | 1.148301  | 0.686649  |
| C  | 1.610237  | -2.090638 | -0.804295 |
| H  | 2.132832  | -3.056427 | -0.840558 |
| H  | 1.326717  | -1.882104 | -1.838751 |
| C  | 1.769434  | 0.310432  | -0.123748 |
| H  | 1.565702  | 0.715481  | -1.115513 |
| C  | 2.558614  | -1.005160 | -0.257522 |
| Cl | 3.882882  | -0.809415 | -1.478805 |
| C  | 3.216953  | -1.483140 | 1.049291  |
| H  | 3.644187  | -2.486069 | 0.930134  |
| H  | 2.503850  | -1.530642 | 1.877589  |
| H  | 4.036709  | -0.828800 | 1.364327  |
| Br | 2.839773  | 1.760840  | 0.687574  |

SCF Energy (SMD/wB97XD/6-31+G\*\*) =  
-6264.2545603

SCF Energy (B3LYP/6-31G\*\*) =  
-6264.28960484

## 1k\_C014

## MMFF Geometry

|    |           |           |           |
|----|-----------|-----------|-----------|
| C  | 1.495736  | -0.477606 | 1.126462  |
| C  | 3.492774  | -0.541763 | -0.544996 |
| C  | 0.458780  | -0.996152 | -0.021544 |
| C  | 2.768554  | 0.240062  | 0.554421  |
| H  | 4.068611  | 0.130526  | -1.191305 |
| H  | 3.472072  | 0.411652  | 1.380640  |
| C  | 2.590821  | -1.367657 | -1.399886 |
| H  | 3.084417  | -1.816177 | -2.260845 |
| C  | 1.274067  | -1.588397 | -1.213732 |
| O  | 4.449022  | -1.421558 | 0.051852  |
| H  | 4.859085  | -1.938129 | -0.661839 |
| Br | 2.487984  | 2.086029  | -0.073373 |
| C  | 2.041296  | -1.708100 | 1.934568  |
| H  | 2.869916  | -1.414206 | 2.590220  |
| H  | 2.403672  | -2.507994 | 1.282084  |
| H  | 1.279192  | -2.143326 | 2.589551  |
| C  | 0.830323  | 0.426685  | 2.194671  |
| H  | 1.564730  | 0.745071  | 2.944829  |
| H  | 0.037154  | -0.096541 | 2.737692  |
| H  | 0.394404  | 1.334768  | 1.771681  |
| C  | 0.580102  | -2.459949 | -2.237693 |
| H  | 1.240981  | -2.729890 | -3.069739 |
| H  | -0.276049 | -1.947573 | -2.683770 |
| H  | 0.252002  | -3.400792 | -1.786627 |
| C  | -0.488163 | -2.092145 | 0.605314  |
| H  | 0.012884  | -3.068619 | 0.604130  |
| H  | -0.694296 | -1.862354 | 1.656325  |
| C  | -0.453008 | 0.141836  | -0.603510 |
| H  | -0.665245 | -0.030443 | -1.666451 |
| H  | 0.068290  | 1.096254  | -0.592220 |
| C  | -1.857234 | -2.243932 | -0.068740 |
| H  | -1.719218 | -2.571506 | -1.101671 |
| H  | -2.396678 | -3.072165 | 0.409727  |
| C  | -1.795814 | 0.286156  | 0.123305  |
| H  | -1.609498 | 0.469270  | 1.184724  |
| C  | -2.706708 | -0.950236 | -0.045467 |
| Cl | -3.811419 | -1.030745 | 1.392506  |
| C  | -3.599402 | -0.953265 | -1.297866 |
| H  | -4.125632 | -1.910281 | -1.401833 |
| H  | -3.004783 | -0.808267 | -2.206686 |
| H  | -4.370440 | -0.176473 | -1.269863 |
| Br | -2.640451 | 1.968516  | -0.440284 |

SCF Energy (SMD/wB97XD/6-31+G\*\*) =  
-6264.2525066

SCF Energy (B3LYP/6-31G\*\*) =  
-6264.28815474

## 1k\_C015

## MMFF Geometry

|    |           |           |           |
|----|-----------|-----------|-----------|
| C  | -1.439652 | -0.607297 | -1.028741 |
| C  | -3.561583 | -0.364007 | 0.484899  |
| C  | -0.506984 | -0.991692 | 0.262410  |
| C  | -2.721091 | 0.224852  | -0.648424 |
| H  | -4.170695 | 0.406370  | 0.972646  |
| H  | -3.357057 | 0.312899  | -1.539885 |
| C  | -2.751669 | -1.041239 | 1.530192  |
| H  | -3.328503 | -1.331826 | 2.407473  |
| C  | -1.433283 | -1.313230 | 1.486972  |
| O  | -4.481051 | -1.335639 | -0.013768 |
| H  | -5.163247 | -0.856645 | -0.514191 |
| Br | -2.388491 | 2.126281  | -0.238388 |
| C  | -1.975758 | -1.915393 | -1.700387 |
| H  | -2.749013 | -1.692260 | -2.445648 |
| H  | -2.412064 | -2.608608 | -0.975030 |
| H  | -1.182444 | -2.447498 | -2.237156 |
| C  | -0.720257 | 0.139130  | -2.178729 |
| H  | -1.416632 | 0.334931  | -3.004688 |
| H  | 0.098034  | -0.437269 | -2.610146 |
| H  | -0.327378 | 1.111352  | -1.877477 |
| C  | -0.850272 | -1.992528 | 2.713694  |
| H  | -1.507753 | -1.899101 | 3.586016  |
| H  | 0.108495  | -1.559197 | 3.007673  |
| H  | -0.713596 | -3.063101 | 2.530344  |
| C  | 0.378129  | -2.270646 | 0.014082  |
| H  | 0.747592  | -2.664653 | 0.966414  |
| H  | -0.213845 | -3.098601 | -0.388265 |
| C  | 0.466077  | 0.157219  | 0.702436  |
| H  | 0.765108  | 0.001357  | 1.746045  |
| H  | -0.057370 | 1.113570  | 0.729016  |
| C  | 1.628356  | -2.076133 | -0.841769 |
| H  | 2.162039  | -3.035125 | -0.894653 |
| H  | 1.341866  | -1.854929 | -1.872461 |
| C  | 1.760407  | 0.313602  | -0.115981 |
| H  | 1.543490  | 0.732316  | -1.099180 |
| C  | 2.565353  | -0.989204 | -0.278484 |
| Cl | 3.881123  | -0.753227 | -1.502120 |
| C  | 3.235827  | -1.483813 | 1.015827  |
| H  | 3.678305  | -2.477192 | 0.874336  |
| H  | 2.526526  | -1.560114 | 1.845209  |
| H  | 4.046296  | -0.823303 | 1.341755  |
| Br | 2.817335  | 1.763687  | 0.712389  |

SCF Energy (SMD/wB97XD/6-31+G\*\*) =  
-6264.2572687

SCF Energy (B3LYP/6-31G\*\*) =  
-6264.29141608

## 1k\_C016

## MMFF Geometry

|    |           |           |           |
|----|-----------|-----------|-----------|
| C  | 1.494945  | -0.504177 | 1.111252  |
| C  | 3.460435  | -0.547026 | -0.605893 |
| C  | 0.443430  | -1.022116 | -0.022515 |
| C  | 2.760161  | 0.213493  | 0.524467  |
| H  | 3.980064  | 0.133719  | -1.290369 |
| H  | 3.480612  | 0.363526  | 1.340209  |
| C  | 2.556320  | -1.408660 | -1.416389 |
| H  | 3.055940  | -1.888998 | -2.257019 |
| C  | 1.244918  | -1.638589 | -1.208352 |
| O  | 4.466304  | -1.412363 | -0.073865 |
| H  | 5.188560  | -0.848009 | 0.250719  |
| Br | 2.489780  | 2.077500  | -0.050269 |
| C  | 2.053387  | -1.736563 | 1.907853  |
| H  | 2.879564  | -1.440106 | 2.565491  |
| H  | 2.425243  | -2.526277 | 1.248391  |
| H  | 1.295831  | -2.185228 | 2.558934  |
| C  | 0.843234  | 0.397115  | 2.190501  |
| H  | 1.587763  | 0.715574  | 2.930613  |
| H  | 0.058354  | -0.126613 | 2.744682  |
| H  | 0.400216  | 1.304901  | 1.774395  |
| C  | 0.549037  | -2.546525 | -2.197775 |
| H  | 0.219282  | -3.470175 | -1.713793 |
| H  | 1.208010  | -2.846904 | -3.020848 |
| H  | -0.306651 | -2.047033 | -2.659585 |
| C  | -0.514461 | -2.096436 | 0.624822  |
| H  | -0.027457 | -3.079927 | 0.633775  |
| H  | -0.710469 | -1.851884 | 1.674233  |
| C  | -0.453414 | 0.118411  | -0.618883 |
| H  | -0.676520 | -0.072700 | -1.676775 |
| H  | 0.084494  | 1.063790  | -0.630756 |
| C  | -1.889395 | -2.236199 | -0.039935 |
| H  | -1.761374 | -2.578049 | -1.069634 |
| H  | -2.438698 | -3.050280 | 0.451393  |
| C  | -1.788345 | 0.295491  | 0.114455  |
| H  | -1.591796 | 0.491755  | 1.171624  |
| C  | -2.719190 | -0.929498 | -0.028251 |
| Cl | -3.811659 | -0.971977 | 1.420844  |
| C  | -3.623228 | -0.937214 | -1.272363 |
| H  | -4.382028 | -0.148310 | -1.248916 |
| H  | -4.164850 | -1.887478 | -1.357440 |
| H  | -3.034810 | -0.814695 | -2.188501 |
| Br | -2.610023 | 1.982011  | -0.468937 |

SCF Energy (SMD/wB97XD/6-31+G\*\*) =  
-6264.2544413

SCF Energy (B3LYP/6-31G\*\*) =  
-6264.28991794

## 1k\_C017

## MMFF Geometry

|    |           |           |           |
|----|-----------|-----------|-----------|
| C  | 1.500329  | -0.482374 | 1.117817  |
| C  | 3.489562  | -0.536252 | -0.567506 |
| C  | 0.459587  | -0.999912 | -0.027893 |
| C  | 2.772395  | 0.236868  | 0.543644  |
| H  | 4.044016  | 0.144791  | -1.222667 |
| H  | 3.480963  | 0.401462  | 1.366866  |
| C  | 2.585110  | -1.365298 | -1.417193 |
| H  | 3.082346  | -1.804602 | -2.282088 |
| C  | 1.271592  | -1.594108 | -1.221611 |
| O  | 4.480589  | -1.395490 | 0.005124  |
| H  | 4.175160  | -2.314949 | -0.072173 |
| Br | 2.487928  | 2.089051  | -0.065609 |
| C  | 2.045888  | -1.714094 | 1.923430  |
| H  | 2.885420  | -1.425829 | 2.567425  |
| H  | 2.390876  | -2.520300 | 1.270177  |
| H  | 1.287790  | -2.140176 | 2.589203  |
| C  | 0.837502  | 0.420064  | 2.189621  |
| H  | 1.574004  | 0.737170  | 2.938282  |
| H  | 0.045781  | -0.103949 | 2.734012  |
| H  | 0.399858  | 1.328644  | 1.769581  |
| C  | 0.575470  | -2.466918 | -2.243241 |
| H  | 1.235590  | -2.739751 | -3.074954 |
| H  | -0.280359 | -1.954232 | -2.689590 |
| H  | 0.246380  | -3.406303 | -1.789863 |
| C  | -0.487892 | -2.094026 | 0.601079  |
| H  | 0.010620  | -3.071770 | 0.597592  |
| H  | -0.690326 | -1.864964 | 1.652914  |
| C  | -0.451312 | 0.139155  | -0.609266 |
| H  | -0.668172 | -0.035659 | -1.670906 |
| H  | 0.073135  | 1.091945  | -0.602910 |
| C  | -1.858972 | -2.241287 | -0.069937 |
| H  | -1.724161 | -2.565333 | -1.104431 |
| H  | -2.398867 | -3.070034 | 0.407131  |
| C  | -1.791361 | 0.288774  | 0.121797  |
| H  | -1.600691 | 0.474037  | 1.182003  |
| C  | -2.705939 | -0.945995 | -0.040138 |
| Cl | -3.798801 | -1.025064 | 1.406864  |
| C  | -3.608531 | -0.947733 | -1.285310 |
| H  | -4.136894 | -1.904009 | -1.385152 |
| H  | -3.020872 | -0.803552 | -2.198789 |
| H  | -4.378226 | -0.169851 | -1.251065 |
| Br | -2.633614 | 1.971693  | -0.442392 |

SCF Energy (SMD/wB97XD/6-31+G\*\*) =  
-6264.2550608

SCF Energy (B3LYP/6-31G\*\*) =  
-6264.29009730

## 1k\_C018

## MMFF Geometry

|    |           |           |           |
|----|-----------|-----------|-----------|
| C  | -1.556930 | 0.683580  | 1.051316  |
| C  | -3.244180 | -0.000651 | -0.844763 |
| C  | -0.542875 | 1.217147  | -0.102317 |
| C  | -2.598262 | -0.355119 | 0.505667  |
| H  | -3.278909 | -0.857300 | -1.527428 |
| H  | -3.393283 | -0.473461 | 1.254834  |
| C  | -2.610508 | 1.133386  | -1.580256 |
| H  | -3.188955 | 1.494744  | -2.429589 |
| C  | -1.434700 | 1.720142  | -1.280623 |
| O  | -4.604826 | 0.388118  | -0.626216 |
| H  | -5.096268 | -0.417177 | -0.388791 |
| Br | -1.938742 | -2.216861 | 0.438238  |
| C  | -2.423012 | 1.884888  | 1.589846  |
| H  | -3.196931 | 1.527558  | 2.281031  |
| H  | -2.936981 | 2.437357  | 0.799009  |
| H  | -1.823056 | 2.603645  | 2.156505  |
| C  | -0.896305 | 0.131684  | 2.335705  |
| H  | -1.654238 | -0.300329 | 3.002483  |
| H  | -0.414959 | 0.919403  | 2.920541  |
| H  | -0.165354 | -0.651623 | 2.151163  |
| C  | -0.962032 | 2.853402  | -2.160938 |
| H  | -0.940107 | 3.792540  | -1.599130 |
| H  | -1.621995 | 3.012792  | -3.021154 |
| H  | 0.034787  | 2.648145  | -2.562861 |
| C  | 0.400796  | 2.359119  | 0.418042  |
| H  | 0.780424  | 2.948946  | -0.422577 |
| H  | -0.147125 | 3.084533  | 1.025352  |
| C  | 0.371161  | 0.139087  | -0.777088 |
| H  | 0.717662  | 0.533813  | -1.744098 |
| H  | -0.210654 | -0.738223 | -1.067171 |
| C  | 1.652064  | 1.910265  | 1.184476  |
| H  | 2.247767  | 2.803231  | 1.419195  |
| H  | 1.371671  | 1.496242  | 2.154648  |
| C  | 1.619707  | -0.289708 | -0.001715 |
| H  | 1.340132  | -0.879070 | 0.872021  |
| C  | 2.514367  | 0.895093  | 0.408578  |
| Cl | 3.804610  | 0.326720  | 1.546994  |
| C  | 3.223821  | 1.597336  | -0.763162 |
| H  | 3.756624  | 2.492222  | -0.419367 |
| H  | 2.522759  | 1.919436  | -1.538670 |
| H  | 3.968764  | 0.954118  | -1.243074 |
| Br | 2.579021  | -1.619957 | -1.102771 |

SCF Energy (SMD/wB97XD/6-31+G\*\*) =  
-6264.2550313

SCF Energy (B3LYP/6-31G\*\*) =  
-6264.28986588

## 1k\_C019

## MMFF Geometry

|    |           |           |           |
|----|-----------|-----------|-----------|
| C  | 1.530343  | 0.387230  | -0.649815 |
| C  | 2.911257  | -1.447883 | 0.535216  |
| C  | 0.142877  | -0.190567 | 0.021117  |
| C  | 2.719951  | 0.052745  | 0.309057  |
| H  | 3.466738  | -1.916264 | -0.286262 |
| H  | 2.608766  | 0.563698  | 1.271148  |
| C  | 1.618283  | -2.171971 | 0.688730  |
| H  | 1.725363  | -3.210737 | 0.999083  |
| C  | 0.389171  | -1.664525 | 0.464425  |
| O  | 3.653846  | -1.675237 | 1.732563  |
| H  | 4.513701  | -1.233263 | 1.614602  |
| Br | 4.464966  | 0.775002  | -0.299736 |
| C  | 1.461542  | 1.923638  | -0.863049 |
| H  | 2.302347  | 2.287311  | -1.463574 |
| H  | 1.486839  | 2.466862  | 0.086882  |
| H  | 0.562304  | 2.232804  | -1.401535 |
| C  | 1.765908  | -0.258289 | -2.049496 |
| H  | 2.735655  | 0.022990  | -2.471361 |
| H  | 1.020525  | 0.069467  | -2.781007 |
| H  | 1.729484  | -1.351028 | -2.018643 |
| C  | -0.782533 | -2.587540 | 0.685504  |
| H  | -0.488198 | -3.518096 | 1.184775  |
| H  | -1.230070 | -2.873579 | -0.269233 |
| H  | -1.534094 | -2.124932 | 1.323915  |
| C  | -0.219622 | 0.606410  | 1.315357  |
| H  | -0.563087 | -0.071046 | 2.106683  |
| H  | 0.663317  | 1.084617  | 1.748694  |
| C  | -1.021931 | -0.104403 | -1.036317 |
| H  | -1.030618 | -1.010197 | -1.656613 |
| H  | -0.757759 | 0.682769  | -1.750825 |
| C  | -1.277962 | 1.689670  | 1.120171  |
| H  | -1.385339 | 2.246392  | 2.060725  |
| H  | -0.932163 | 2.420411  | 0.380701  |
| C  | -2.455018 | 0.292335  | -0.611460 |
| H  | -2.818499 | 0.910396  | -1.444959 |
| C  | -2.629184 | 1.098413  | 0.695615  |
| Cl | -3.724318 | 2.518123  | 0.355857  |
| C  | -3.277775 | 0.364820  | 1.882319  |
| H  | -3.271140 | 0.991693  | 2.782771  |
| H  | -2.756091 | -0.558931 | 2.137771  |
| H  | -4.326708 | 0.112254  | 1.690789  |
| Br | -3.690408 | -1.219868 | -0.808803 |

SCF Energy (SMD/wB97XD/6-31+G\*\*) =  
-6264.2495174

SCF Energy (B3LYP/6-31G\*\*) =  
-6264.28670115

## 1k\_C020

## MMFF Geometry

|    |           |           |           |
|----|-----------|-----------|-----------|
| C  | 1.347507  | -0.386113 | 0.575197  |
| C  | 2.827804  | 1.591431  | -0.170490 |
| C  | -0.023211 | 0.428379  | 0.160690  |
| C  | 2.515407  | 0.105458  | -0.340104 |
| H  | 3.469214  | 1.776924  | 0.699649  |
| H  | 2.313273  | -0.125341 | -1.391379 |
| C  | 1.599338  | 2.417217  | -0.017641 |
| H  | 1.787112  | 3.490117  | -0.040110 |
| C  | 0.339325  | 1.960036  | 0.140913  |
| O  | 3.517926  | 2.085533  | -1.317778 |
| H  | 4.337923  | 1.565570  | -1.393605 |
| Br | 4.224565  | -0.869616 | -0.064920 |
| C  | 1.202830  | -1.915722 | 0.418216  |
| H  | 2.040597  | -2.452882 | 0.876898  |
| H  | 1.176132  | -2.215956 | -0.632009 |
| H  | 0.316669  | -2.296739 | 0.921862  |
| C  | 1.691197  | -0.126374 | 2.076896  |
| H  | 2.665786  | -0.543588 | 2.349206  |
| H  | 0.969098  | -0.599427 | 2.749591  |
| H  | 1.714190  | 0.937397  | 2.328984  |
| C  | -0.738794 | 3.013160  | 0.238137  |
| H  | -0.326573 | 4.029582  | 0.235516  |
| H  | -1.302440 | 2.926608  | 1.169201  |
| H  | -1.408932 | 2.960806  | -0.622154 |
| C  | -0.519518 | 0.113613  | -1.287063 |
| H  | -1.132951 | 0.948415  | -1.651124 |
| H  | 0.319495  | 0.082280  | -1.990042 |
| C  | -1.182074 | 0.100294  | 1.180798  |
| H  | -1.292484 | 0.906026  | 1.915701  |
| H  | -0.885891 | -0.757760 | 1.791055  |
| C  | -1.363688 | -1.146183 | -1.501327 |
| H  | -1.771046 | -1.077695 | -2.519959 |
| H  | -0.708801 | -2.020631 | -1.547643 |
| C  | -2.563273 | -0.299415 | 0.616764  |
| H  | -3.159199 | -0.686705 | 1.454414  |
| C  | -2.517831 | -1.361897 | -0.500232 |
| Cl | -2.247076 | -2.978097 | 0.320645  |
| C  | -3.846502 | -1.552975 | -1.255002 |
| H  | -3.809101 | -2.431902 | -1.910740 |
| H  | -4.076849 | -0.699286 | -1.901047 |
| H  | -4.685132 | -1.693151 | -0.563152 |
| Br | -3.627545 | 1.277481  | 0.143424  |

SCF Energy (SMD/wB97XD/6-31+G\*\*) =  
-6264.2464502

SCF Energy (B3LYP/6-31G\*\*) =  
-6264.28748728

## 1I\_C001

## MMFF Geometry

|    |           |           |           |
|----|-----------|-----------|-----------|
| C  | -1.311326 | -0.288428 | -0.321134 |
| C  | -3.238460 | 1.300378  | 0.434349  |
| C  | -0.202187 | 0.655232  | 0.450323  |
| C  | -2.688677 | -0.127455 | 0.415685  |
| H  | -4.032430 | 1.378894  | 1.186753  |
| H  | -2.578799 | -0.468579 | 1.451749  |
| C  | -2.174706 | 2.289799  | 0.745768  |
| H  | -2.548814 | 3.291798  | 0.951667  |
| C  | -0.848721 | 2.052132  | 0.774094  |
| O  | -3.797640 | 1.707191  | -0.811058 |
| H  | -4.407092 | 0.999583  | -1.088369 |
| Br | -4.127501 | -1.312659 | -0.251360 |
| C  | -0.950546 | -1.793482 | -0.321310 |
| H  | -1.598337 | -2.365698 | -0.995223 |
| H  | -1.063143 | -2.236418 | 0.673047  |
| H  | 0.057401  | -1.988147 | -0.678874 |
| C  | -1.429936 | 0.126973  | -1.812891 |
| H  | -2.293385 | -0.334416 | -2.302075 |
| H  | -0.552729 | -0.198743 | -2.383668 |
| H  | -1.520187 | 1.209747  | -1.939384 |
| C  | 0.038122  | 3.223863  | 1.151244  |
| H  | -0.530504 | 4.036026  | 1.619041  |
| H  | 0.520343  | 3.642775  | 0.262276  |
| H  | 0.807345  | 2.934030  | 1.871588  |
| C  | 0.229339  | 0.052679  | 1.832219  |
| H  | 0.587490  | 0.851357  | 2.493256  |
| H  | -0.637130 | -0.362706 | 2.358456  |
| C  | 1.089393  | 0.912645  | -0.409841 |
| H  | 1.613185  | 1.798246  | -0.035781 |
| H  | 0.823856  | 1.194787  | -1.434267 |
| C  | 1.334263  | -1.013327 | 1.810860  |
| H  | 1.618608  | -1.228302 | 2.850405  |
| H  | 0.931817  | -1.957380 | 1.434951  |
| C  | 2.136759  | -0.203077 | -0.419600 |
| H  | 1.774010  | -1.061475 | -0.986312 |
| C  | 2.581273  | -0.616501 | 0.997504  |
| Cl | 3.634181  | -2.088852 | 0.905211  |
| C  | 3.374829  | 0.458570  | 1.761225  |
| H  | 4.338947  | 0.676781  | 1.290682  |
| H  | 3.592079  | 0.131914  | 2.785533  |
| H  | 2.825842  | 1.401265  | 1.837513  |
| Br | 3.648505  | 0.407734  | -1.538756 |

SCF Energy (SMD/wB97XD/6-31+G\*\*) =  
-6264.2583628

SCF Energy (B3LYP/6-31G\*\*) =  
-6264.29682098

## 1I\_C002

## MMFF Geometry

|    |           |           |           |
|----|-----------|-----------|-----------|
| C  | 1.459702  | 0.283004  | -0.575810 |
| C  | 2.751622  | -1.459024 | 0.847817  |
| C  | 0.027610  | -0.216940 | 0.077460  |
| C  | 2.584207  | 0.017877  | 0.476006  |
| H  | 3.284265  | -1.539739 | 1.802699  |
| H  | 2.356326  | 0.582362  | 1.388230  |
| C  | 1.443185  | -2.165214 | 0.952662  |
| H  | 1.529047  | -3.190505 | 1.310787  |
| C  | 0.230830  | -1.671483 | 0.620145  |
| O  | 3.503773  | -2.196420 | -0.114460 |
| H  | 4.290542  | -1.661491 | -0.324126 |
| Br | 4.353805  | 0.741019  | -0.021612 |
| C  | 1.446638  | 1.799132  | -0.932312 |
| H  | 2.276944  | 2.058464  | -1.599525 |
| H  | 1.547093  | 2.434060  | -0.046579 |
| H  | 0.540556  | 2.105883  | -1.457596 |
| C  | 1.737755  | -0.476727 | -1.906549 |
| H  | 2.755587  | -0.301154 | -2.269054 |
| H  | 1.069651  | -0.143025 | -2.707741 |
| H  | 1.604243  | -1.557855 | -1.812879 |
| C  | -0.939327 | -2.599576 | 0.805158  |
| H  | -0.655785 | -3.530682 | 1.310531  |
| H  | -1.349479 | -2.893976 | -0.163295 |
| H  | -1.709681 | -2.147585 | 1.429276  |
| C  | -0.318696 | 0.659086  | 1.325892  |
| H  | 0.194259  | 0.273770  | 2.218040  |
| H  | 0.076834  | 1.670267  | 1.210922  |
| C  | -1.092612 | -0.136745 | -1.036698 |
| H  | -1.106697 | -1.073018 | -1.609995 |
| H  | -0.781128 | 0.604724  | -1.778452 |
| C  | -1.799583 | 0.798678  | 1.677320  |
| H  | -2.181401 | -0.150329 | 2.066423  |
| H  | -1.885842 | 1.507751  | 2.512108  |
| C  | -2.529692 | 0.305266  | -0.683685 |
| H  | -2.955031 | 0.783849  | -1.576890 |
| C  | -2.660881 | 1.271799  | 0.502976  |
| Cl | -2.057616 | 2.902327  | -0.049496 |
| C  | -4.103305 | 1.517731  | 0.973059  |
| H  | -4.755226 | 1.792707  | 0.136014  |
| H  | -4.148504 | 2.330706  | 1.708236  |
| H  | -4.531844 | 0.638388  | 1.464855  |
| Br | -3.723524 | -1.253103 | -0.555403 |

SCF Energy (SMD/wB97XD/6-31+G\*\*) =  
-6264.2490217

SCF Energy (B3LYP/6-31G\*\*) =  
-6264.29126528

## 1I\_C003

## MMFF Geometry

|    |           |           |           |
|----|-----------|-----------|-----------|
| C  | -1.322518 | -0.782635 | -1.114672 |
| C  | -3.552726 | -0.835579 | 0.185842  |
| C  | -0.449618 | -1.010813 | 0.261157  |
| C  | -2.709206 | -0.091323 | -0.851089 |
| H  | -3.944007 | -1.759874 | -0.253076 |
| H  | -3.287351 | -0.023412 | -1.781958 |
| C  | -2.767612 | -1.207406 | 1.392529  |
| H  | -3.373441 | -1.461825 | 2.261784  |
| C  | -1.423801 | -1.286021 | 1.467654  |
| O  | -4.699121 | -0.096810 | 0.595360  |
| H  | -4.382434 | 0.791025  | 0.845536  |
| Br | -2.579060 | 1.819328  | -0.349989 |
| C  | -1.668213 | -2.158431 | -1.773534 |
| H  | -2.390934 | -2.035125 | -2.589588 |
| H  | -2.102994 | -2.865525 | -1.060353 |
| H  | -0.784206 | -2.629415 | -2.216639 |
| C  | -0.608435 | 0.008856  | -2.236316 |
| H  | -1.262001 | 0.111159  | -3.112391 |
| H  | 0.293227  | -0.492268 | -2.592156 |
| H  | -0.339870 | 1.024127  | -1.937609 |
| C  | -0.856863 | -1.712850 | 2.811700  |
| H  | -0.568559 | -2.768487 | 2.788802  |
| H  | -1.591312 | -1.601593 | 3.618237  |
| H  | 0.009579  | -1.119663 | 3.109217  |
| C  | 0.501586  | -2.260243 | 0.173491  |
| H  | 0.848458  | -2.541313 | 1.173356  |
| H  | -0.035644 | -3.151005 | -0.167660 |
| C  | 0.454753  | 0.220691  | 0.633703  |
| H  | 0.710642  | 0.179889  | 1.697753  |
| H  | -0.106124 | 1.151458  | 0.542252  |
| C  | 1.768893  | -2.079548 | -0.660054 |
| H  | 2.342028  | -3.016107 | -0.624805 |
| H  | 1.503606  | -1.944051 | -1.712060 |
| C  | 1.782252  | 0.363739  | -0.135067 |
| H  | 1.597824  | 0.696127  | -1.157307 |
| C  | 2.641962  | -0.913386 | -0.155517 |
| Cl | 3.995690  | -0.726444 | -1.345103 |
| C  | 3.277166  | -1.270276 | 1.200294  |
| H  | 4.054295  | -0.556958 | 1.494775  |
| H  | 3.754539  | -2.256823 | 1.163042  |
| H  | 2.539317  | -1.296653 | 2.007726  |
| Br | 2.744085  | 1.917291  | 0.618739  |

SCF Energy (SMD/wB97XD/6-31+G\*\*) =  
-6264.2597052

SCF Energy (B3LYP/6-31G\*\*) =  
-6264.29580157

## 1I\_C004

## MMFF Geometry

|    |           |           |           |
|----|-----------|-----------|-----------|
| C  | -1.312277 | -0.294674 | -0.329282 |
| C  | -3.243752 | 1.300935  | 0.395121  |
| C  | -0.210582 | 0.641227  | 0.462729  |
| C  | -2.698472 | -0.129270 | 0.390360  |
| H  | -4.072915 | 1.370579  | 1.109573  |
| H  | -2.592808 | -0.456637 | 1.431660  |
| C  | -2.184188 | 2.278814  | 0.768315  |
| H  | -2.551977 | 3.272696  | 1.017976  |
| C  | -0.859999 | 2.032565  | 0.815136  |
| O  | -3.742026 | 1.702424  | -0.877215 |
| H  | -4.092152 | 2.603877  | -0.787676 |
| Br | -4.122270 | -1.338903 | -0.255695 |
| C  | -0.954320 | -1.800809 | -0.333100 |
| H  | -1.594498 | -2.368215 | -1.018308 |
| H  | -1.078867 | -2.248982 | 0.657538  |
| H  | 0.057622  | -1.994879 | -0.680384 |
| C  | -1.409703 | 0.125309  | -1.820693 |
| H  | -2.273394 | -0.326272 | -2.318951 |
| H  | -0.529172 | -0.207571 | -2.382351 |
| H  | -1.485770 | 1.209359  | -1.945605 |
| C  | 0.026393  | 3.186125  | 1.248328  |
| H  | -0.545978 | 3.982144  | 1.738754  |
| H  | 0.520889  | 3.636212  | 0.381588  |
| H  | 0.786566  | 2.869093  | 1.966388  |
| C  | 0.219814  | 0.009423  | 1.833149  |
| H  | 0.570790  | 0.793406  | 2.514734  |
| H  | -0.646834 | -0.422328 | 2.346010  |
| C  | 1.081242  | 0.921100  | -0.388783 |
| H  | 1.602417  | 1.799483  | 0.005513  |
| H  | 0.816543  | 1.225689  | -1.407051 |
| C  | 1.331327  | -1.049746 | 1.793764  |
| H  | 1.617390  | -1.279771 | 2.829654  |
| H  | 0.934280  | -1.990472 | 1.404137  |
| C  | 2.128925  | -0.193650 | -0.422199 |
| H  | 1.765237  | -1.041023 | -1.005029 |
| C  | 2.575856  | -0.633434 | 0.986383  |
| Cl | 3.634334  | -2.099589 | 0.864951  |
| C  | 3.366456  | 0.429274  | 1.770471  |
| H  | 4.328337  | 0.661862  | 1.302277  |
| H  | 3.587891  | 0.082336  | 2.787203  |
| H  | 2.813240  | 1.367475  | 1.868093  |
| Br | 3.638710  | 0.441658  | -1.530602 |

SCF Energy (SMD/wB97XD/6-31+G\*\*) =  
-6264.2544965

SCF Energy (B3LYP/6-31G\*\*) =  
-6264.28880081

## 1I\_C005

## MMFF Geometry

|    |          |          |          |
|----|----------|----------|----------|
| C  | -1.38550 | -0.44209 | -0.37512 |
| C  | -3.14886 | 1.39822  | 0.12936  |
| C  | -0.19315 | 0.64753  | -0.10335 |
| C  | -2.61232 | 0.00166  | 0.48797  |
| H  | -3.70499 | 1.80910  | 0.97990  |
| H  | -2.32170 | 0.00141  | 1.54454  |
| C  | -2.07119 | 2.35549  | -0.26896 |
| H  | -2.43452 | 3.35345  | -0.51164 |
| C  | -0.76097 | 2.06591  | -0.42160 |
| O  | -4.04351 | 1.37343  | -0.98374 |
| H  | -4.66129 | 0.63551  | -0.83153 |
| Br | -4.11528 | -1.27721 | 0.49905  |
| C  | -0.95384 | -1.88312 | 0.00118  |
| H  | -1.70744 | -2.62066 | -0.29653 |
| H  | -0.79629 | -2.00855 | 1.07536  |
| H  | -0.04092 | -2.18101 | -0.52081 |
| C  | -1.76157 | -0.49690 | -1.88723 |
| H  | -2.68841 | -1.05573 | -2.05220 |
| H  | -0.99684 | -1.01171 | -2.47785 |
| H  | -1.89454 | 0.49223  | -2.33285 |
| C  | 0.13328  | 3.16588  | -0.94408 |
| H  | -0.36120 | 4.14391  | -0.92157 |
| H  | 0.40394  | 2.97116  | -1.98694 |
| H  | 1.04601  | 3.26991  | -0.35673 |
| C  | 0.19981  | 0.66377  | 1.42374  |
| H  | -0.53134 | 1.23891  | 2.00631  |
| H  | 0.18286  | -0.34483 | 1.84634  |
| C  | 1.09124  | 0.31368  | -0.94709 |
| H  | 1.54500  | 1.21107  | -1.37642 |
| H  | 0.83441  | -0.29205 | -1.81976 |
| C  | 1.58400  | 1.24956  | 1.71192  |
| H  | 1.58988  | 2.29956  | 1.40594  |
| H  | 1.73360  | 1.28381  | 2.79918  |
| C  | 2.18037  | -0.39586 | -0.13158 |
| H  | 1.77516  | -1.32998 | 0.26967  |
| C  | 2.73342  | 0.47483  | 1.02060  |
| Cl | 3.47426  | -0.63581 | 2.25156  |
| C  | 3.81700  | 1.48923  | 0.61978  |
| H  | 4.74547  | 1.00980  | 0.29341  |
| H  | 4.08056  | 2.13576  | 1.46596  |
| H  | 3.47060  | 2.13928  | -0.19091 |
| Br | 3.56978  | -1.03639 | -1.36507 |

SCF Energy (SMD/wB97XD/6-31+G\*\*) =  
-6264.2553988

SCF Energy (B3LYP/6-31G\*\*) =  
-6264.29326878

## 1I\_C006

## MMFF Geometry

|    |           |           |           |
|----|-----------|-----------|-----------|
| C  | 1.577416  | 1.315666  | 0.655768  |
| C  | 3.019716  | -0.785174 | 1.078392  |
| C  | 0.192066  | 0.440861  | 0.818477  |
| C  | 2.789274  | 0.441677  | 0.185522  |
| H  | 3.635528  | -0.460914 | 1.927117  |
| H  | 3.706645  | 1.045295  | 0.202749  |
| C  | 1.783897  | -1.369705 | 1.675929  |
| H  | 1.973976  | -2.256834 | 2.280214  |
| C  | 0.539775  | -0.846890 | 1.633683  |
| O  | 3.758723  | -1.828748 | 0.457636  |
| H  | 3.351340  | -1.975582 | -0.415677 |
| Br | 2.747694  | -0.071538 | -1.718998 |
| C  | 1.985769  | 1.918397  | 2.046037  |
| H  | 2.978775  | 2.381354  | 1.993882  |
| H  | 2.018880  | 1.169472  | 2.842287  |
| H  | 1.294134  | 2.704323  | 2.368104  |
| C  | 1.443919  | 2.561773  | -0.267013 |
| H  | 2.395816  | 3.106420  | -0.309294 |
| H  | 0.698768  | 3.272866  | 0.100405  |
| H  | 1.180006  | 2.326765  | -1.299182 |
| C  | -0.490613 | -1.512378 | 2.516794  |
| H  | -0.104571 | -2.421473 | 2.993035  |
| H  | -1.375063 | -1.816407 | 1.967217  |
| H  | -0.791718 | -0.845286 | 3.329986  |
| C  | -0.860988 | 1.317662  | 1.575548  |
| H  | -0.646781 | 1.322544  | 2.652136  |
| H  | -0.760070 | 2.364120  | 1.275618  |
| C  | -0.363171 | 0.007581  | -0.590130 |
| H  | 0.148303  | -0.903984 | -0.921217 |
| H  | -0.084440 | 0.771746  | -1.317989 |
| C  | -2.339086 | 0.957479  | 1.389738  |
| H  | -2.574645 | 0.030884  | 1.920325  |
| H  | -2.941452 | 1.729145  | 1.888890  |
| C  | -1.873955 | -0.167846 | -0.820446 |
| H  | -2.057760 | -0.073244 | -1.899691 |
| C  | -2.762774 | 0.837402  | -0.077152 |
| Cl | -2.534383 | 2.463289  | -0.876319 |
| C  | -4.266833 | 0.542944  | -0.174505 |
| H  | -4.579112 | 0.399717  | -1.215257 |
| H  | -4.860722 | 1.366988  | 0.239462  |
| H  | -4.547665 | -0.352010 | 0.390174  |
| Br | -2.384550 | -2.045277 | -0.556339 |

SCF Energy (SMD/wB97XD/6-31+G\*\*) =  
-6264.2507400

SCF Energy (B3LYP/6-31G\*\*) =  
-6264.29273655

## 1I\_C007

## MMFF Geometry

|    |           |           |           |
|----|-----------|-----------|-----------|
| C  | -1.317452 | -0.289339 | -0.330232 |
| C  | -3.247815 | 1.303334  | 0.423823  |
| C  | -0.211223 | 0.645634  | 0.456141  |
| C  | -2.702448 | -0.127684 | 0.394404  |
| H  | -4.046493 | 1.364175  | 1.172615  |
| H  | -2.591389 | -0.467031 | 1.431364  |
| C  | -2.181831 | 2.283112  | 0.776239  |
| H  | -2.555699 | 3.274786  | 1.030308  |
| C  | -0.856960 | 2.040135  | 0.801501  |
| O  | -3.819732 | 1.716386  | -0.814859 |
| H  | -3.194141 | 2.300571  | -1.273555 |
| Br | -4.124963 | -1.333596 | -0.259409 |
| C  | -0.958258 | -1.795632 | -0.335044 |
| H  | -1.598981 | -2.363379 | -1.019450 |
| H  | -1.080664 | -2.244136 | 0.655700  |
| H  | 0.053183  | -1.989023 | -0.683764 |
| C  | -1.419259 | 0.129838  | -1.821196 |
| H  | -2.295334 | -0.304125 | -2.312933 |
| H  | -0.549088 | -0.220630 | -2.388570 |
| H  | -1.472107 | 1.214219  | -1.948235 |
| C  | 0.032919  | 3.196966  | 1.219192  |
| H  | -0.535755 | 3.998391  | 1.705073  |
| H  | 0.522956  | 3.638344  | 0.345469  |
| H  | 0.796505  | 2.885147  | 1.935996  |
| C  | 0.217480  | 0.021090  | 1.830344  |
| H  | 0.570458  | 0.808755  | 2.506803  |
| H  | -0.650146 | -0.405169 | 2.346021  |
| C  | 1.081563  | 0.915382  | -0.397706 |
| H  | 1.603334  | 1.797098  | -0.011824 |
| H  | 0.817776  | 1.209718  | -1.419178 |
| C  | 1.326039  | -1.041275 | 1.797676  |
| H  | 1.609421  | -1.267808 | 2.835056  |
| H  | 0.927126  | -1.982312 | 1.410605  |
| C  | 2.129489  | -0.199918 | -0.420726 |
| H  | 1.767340  | -1.050967 | -0.999062 |
| C  | 2.573222  | -0.631342 | 0.991222  |
| Cl | 3.629752  | -2.099383 | 0.880314  |
| C  | 3.363441  | 0.435266  | 1.770106  |
| H  | 4.327202  | 0.662581  | 1.303155  |
| H  | 3.581026  | 0.095167  | 2.789962  |
| H  | 2.811854  | 1.375275  | 1.859078  |
| Br | 3.640970  | 0.428321  | -1.530636 |

SCF Energy (SMD/wB97XD/6-31+G\*\*) =  
-6264.2562556

SCF Energy (B3LYP/6-31G\*\*) =  
-6264.29068035

## 1I\_C008

## MMFF Geometry

|    |           |           |           |
|----|-----------|-----------|-----------|
| C  | 1.403119  | -0.607364 | 1.260184  |
| C  | 3.494521  | -0.943935 | -0.201738 |
| C  | 0.400669  | -1.038402 | 0.037796  |
| C  | 2.763843  | -0.006873 | 0.766240  |
| H  | 3.953531  | -1.759590 | 0.368746  |
| H  | 3.425132  | 0.185749  | 1.621265  |
| C  | 2.590064  | -1.568782 | -1.207018 |
| H  | 3.111642  | -2.038833 | -2.040479 |
| C  | 1.244592  | -1.636939 | -1.136820 |
| O  | 4.570913  | -0.313251 | -0.887199 |
| H  | 4.220581  | 0.523997  | -1.243796 |
| Br | 2.638540  | 1.801783  | -0.010949 |
| C  | 1.797639  | -1.871990 | 2.102342  |
| H  | 2.613901  | -1.641702 | 2.797953  |
| H  | 2.126050  | -2.705443 | 1.473775  |
| H  | 0.968602  | -2.234647 | 2.718916  |
| C  | 0.751266  | 0.356016  | 2.281983  |
| H  | 1.460236  | 0.613848  | 3.078373  |
| H  | -0.116222 | -0.098975 | 2.770560  |
| H  | 0.423141  | 1.296982  | 1.834229  |
| C  | 0.549476  | -2.362358 | -2.268963 |
| H  | 0.136256  | -3.312596 | -1.918369 |
| H  | 1.235983  | -2.605150 | -3.088642 |
| H  | -0.246280 | -1.758067 | -2.710715 |
| C  | -0.625169 | -2.109007 | 0.576206  |
| H  | -0.167272 | -3.106416 | 0.567792  |
| H  | -0.877722 | -1.899069 | 1.621661  |
| C  | -0.432512 | 0.165707  | -0.535932 |
| H  | -0.589933 | 0.059303  | -1.615980 |
| H  | 0.120432  | 1.097452  | -0.443740 |
| C  | -1.960932 | -2.179280 | -0.173669 |
| H  | -1.781847 | -2.476163 | -1.209382 |
| H  | -2.558233 | -3.000005 | 0.245294  |
| C  | -1.806858 | 0.335181  | 0.124426  |
| H  | -1.669343 | 0.465829  | 1.201194  |
| C  | -2.756703 | -0.852278 | -0.145856 |
| Cl | -3.944122 | -0.939939 | 1.224165  |
| C  | -3.574758 | -0.767668 | -1.445291 |
| H  | -4.313078 | 0.040586  | -1.428702 |
| H  | -4.133426 | -1.695932 | -1.617918 |
| H  | -2.923044 | -0.613707 | -2.312524 |
| Br | -2.551850 | 2.074655  | -0.405796 |

SCF Energy (SMD/wB97XD/6-31+G\*\*) =  
-6264.2564030

SCF Energy (B3LYP/6-31G\*\*) =  
-6264.29341090



## 1I\_C009

## MMFF Geometry

|    |           |           |           |
|----|-----------|-----------|-----------|
| C  | 1.464279  | 0.283892  | -0.582677 |
| C  | 2.764948  | -1.481772 | 0.799753  |
| C  | 0.034324  | -0.218323 | 0.074595  |
| C  | 2.593475  | 0.002713  | 0.460392  |
| H  | 3.332778  | -1.576766 | 1.732982  |
| H  | 2.355885  | 0.541012  | 1.386101  |
| C  | 1.449811  | -2.177435 | 0.938565  |
| H  | 1.520714  | -3.195518 | 1.318113  |
| C  | 0.237035  | -1.673880 | 0.621396  |
| O  | 3.483909  | -2.188030 | -0.209538 |
| H  | 3.612693  | -3.098957 | 0.101163  |
| Br | 4.349204  | 0.773891  | -0.001923 |
| C  | 1.450875  | 1.802604  | -0.927812 |
| H  | 2.274827  | 2.065041  | -1.601770 |
| H  | 1.561047  | 2.431408  | -0.038900 |
| H  | 0.539946  | 2.113431  | -1.442312 |
| C  | 1.733665  | -0.463046 | -1.922169 |
| H  | 2.757614  | -0.303605 | -2.275243 |
| H  | 1.077677  | -0.104412 | -2.722713 |
| H  | 1.574880  | -1.542089 | -1.844072 |
| C  | -0.940083 | -2.587869 | 0.833858  |
| H  | -0.659654 | -3.514148 | 1.349720  |
| H  | -1.362296 | -2.892600 | -0.126151 |
| H  | -1.700305 | -2.120984 | 1.458936  |
| C  | -0.310649 | 0.659930  | 1.322994  |
| H  | 0.199692  | 0.272397  | 2.215693  |
| H  | 0.089388  | 1.669309  | 1.208915  |
| C  | -1.087984 | -0.139878 | -1.037330 |
| H  | -1.104629 | -1.078466 | -1.606851 |
| H  | -0.776472 | 0.599022  | -1.781810 |
| C  | -1.790836 | 0.809023  | 1.674299  |
| H  | -2.177325 | -0.134791 | 2.070826  |
| H  | -1.872799 | 1.523887  | 2.504639  |
| C  | -2.523642 | 0.306129  | -0.683802 |
| H  | -2.950188 | 0.780721  | -1.578550 |
| C  | -2.651887 | 1.278431  | 0.498501  |
| Cl | -2.047095 | 2.905330  | -0.060675 |
| C  | -4.093672 | 1.528629  | 0.968679  |
| H  | -4.745820 | 1.800963  | 0.130940  |
| H  | -4.137082 | 2.344834  | 1.700387  |
| H  | -4.523271 | 0.652148  | 1.464637  |
| Br | -3.718802 | -1.250836 | -0.545287 |

SCF Energy (SMD/wB97XD/6-31+G\*\*) =  
-6264.2452207

SCF Energy (B3LYP/6-31G\*\*) =  
-6264.28335022

## 1I\_C010

## MMFF Geometry

|    |           |           |           |
|----|-----------|-----------|-----------|
| C  | 1.463821  | 0.283405  | -0.581067 |
| C  | 2.752522  | -1.448787 | 0.884165  |
| C  | 0.033121  | -0.216265 | 0.072035  |
| C  | 2.597034  | 0.019025  | 0.465547  |
| H  | 3.234452  | -1.484017 | 1.868320  |
| H  | 2.368427  | 0.600769  | 1.367404  |
| C  | 1.443262  | -2.162029 | 0.962641  |
| H  | 1.524465  | -3.180345 | 1.343216  |
| C  | 0.235624  | -1.674480 | 0.606614  |
| O  | 3.577848  | -2.215890 | 0.010227  |
| H  | 3.074419  | -2.416870 | -0.794120 |
| Br | 4.355598  | 0.753596  | -0.040772 |
| C  | 1.449399  | 1.802401  | -0.931907 |
| H  | 2.273810  | 2.062917  | -1.605989 |
| H  | 1.557928  | 2.433904  | -0.044599 |
| H  | 0.539080  | 2.113112  | -1.447404 |
| C  | 1.728898  | -0.467799 | -1.917790 |
| H  | 2.763810  | -0.351984 | -2.253871 |
| H  | 1.100980  | -0.078444 | -2.726979 |
| H  | 1.518636  | -1.538128 | -1.849656 |
| C  | -0.935449 | -2.604635 | 0.778888  |
| H  | -0.653786 | -3.540507 | 1.276422  |
| H  | -1.341566 | -2.890627 | -0.193795 |
| H  | -1.708061 | -2.158062 | 1.404115  |
| C  | -0.309314 | 0.654224  | 1.325215  |
| H  | 0.207723  | 0.266312  | 2.213839  |
| H  | 0.084201  | 1.666485  | 1.212551  |
| C  | -1.089973 | -0.128104 | -1.039481 |
| H  | -1.106495 | -1.060930 | -1.618250 |
| H  | -0.779403 | 0.616412  | -1.778489 |
| C  | -1.789241 | 0.789627  | 1.682353  |
| H  | -2.168698 | -0.162739 | 2.065610  |
| H  | -1.873625 | 1.492586  | 2.522475  |
| C  | -2.526140 | 0.313097  | -0.680281 |
| H  | -2.952644 | 0.798734  | -1.569114 |
| C  | -2.654747 | 1.270487  | 0.514092  |
| Cl | -2.054680 | 2.904978  | -0.029151 |
| C  | -4.095883 | 1.511569  | 0.990393  |
| H  | -4.750663 | 1.792174  | 0.157458  |
| H  | -4.139536 | 2.318997  | 1.731747  |
| H  | -4.522034 | 0.628127  | 1.476899  |
| Br | -3.720234 | -1.246047 | -0.563015 |

SCF Energy (SMD/wB97XD/6-31+G\*\*) =  
-6264.2478580

SCF Energy (B3LYP/6-31G\*\*) =  
-6264.28640854

## 1I\_C011

## MMFF Geometry

|    |           |           |           |
|----|-----------|-----------|-----------|
| C  | -1.390770 | -0.437094 | -0.394220 |
| C  | -3.167699 | 1.380715  | 0.135898  |
| C  | -0.201521 | 0.644052  | -0.075489 |
| C  | -2.626468 | -0.019852 | 0.470039  |
| H  | -3.762714 | 1.749900  | 0.979566  |
| H  | -2.335305 | -0.031647 | 1.526470  |
| C  | -2.081642 | 2.361276  | -0.188565 |
| H  | -2.428709 | 3.376251  | -0.374806 |
| C  | -0.768752 | 2.077615  | -0.332167 |
| O  | -4.017822 | 1.359733  | -1.010883 |
| H  | -4.450307 | 2.227029  | -1.073430 |
| Br | -4.105894 | -1.322072 | 0.479294  |
| C  | -0.961113 | -1.890029 | -0.063113 |
| H  | -1.706458 | -2.617923 | -0.402808 |
| H  | -0.823639 | -2.055308 | 1.008436  |
| H  | -0.038061 | -2.166300 | -0.578775 |
| C  | -1.752499 | -0.443083 | -1.910317 |
| H  | -2.691127 | -0.974796 | -2.097697 |
| H  | -0.994136 | -0.960692 | -2.507028 |
| H  | -1.855197 | 0.560932  | -2.330228 |
| C  | 0.135632  | 3.203054  | -0.779368 |
| H  | -0.354994 | 4.180301  | -0.702996 |
| H  | 0.414929  | 3.069543  | -1.829584 |
| H  | 1.043690  | 3.268750  | -0.180167 |
| C  | 0.190181  | 0.593555  | 1.451581  |
| H  | -0.542208 | 1.142383  | 2.057492  |
| H  | 0.172658  | -0.432554 | 1.829314  |
| C  | 1.083631  | 0.348782  | -0.932049 |
| H  | 1.533267  | 1.264348  | -1.325844 |
| H  | 0.828345  | -0.221987 | -1.828443 |
| C  | 1.573659  | 1.164097  | 1.772188  |
| H  | 1.578053  | 2.229878  | 1.527711  |
| H  | 1.721332  | 1.137548  | 2.859979  |
| C  | 2.176021  | -0.390186 | -0.147563 |
| H  | 1.776220  | -1.342794 | 0.213314  |
| C  | 2.726211  | 0.432044  | 1.040750  |
| Cl | 3.483982  | -0.725806 | 2.216783  |
| C  | 3.799066  | 1.473240  | 0.681234  |
| H  | 4.730033  | 1.017389  | 0.329184  |
| H  | 4.061392  | 2.083076  | 1.554615  |
| H  | 3.443268  | 2.156255  | -0.097588 |
| Br | 3.568491  | -0.969010 | -1.408665 |

SCF Energy (SMD/wB97XD/6-31+G\*\*) =  
-6264.2516880

SCF Energy (B3LYP/6-31G\*\*) =  
-6264.28531024

## 1I\_C012

## MMFF Geometry

|    |           |           |           |
|----|-----------|-----------|-----------|
| C  | -1.323654 | -0.753099 | -1.119273 |
| C  | -3.558782 | -0.815555 | 0.167919  |
| C  | -0.456755 | -0.993700 | 0.257869  |
| C  | -2.708375 | -0.055347 | -0.852668 |
| H  | -3.920080 | -1.746589 | -0.283347 |
| H  | -3.280952 | 0.025291  | -1.786075 |
| C  | -2.780644 | -1.178909 | 1.385886  |
| H  | -3.375256 | -1.421840 | 2.264261  |
| C  | -1.436328 | -1.262165 | 1.463246  |
| O  | -4.733496 | -0.094719 | 0.524499  |
| H  | -5.188796 | -0.585161 | 1.227721  |
| Br | -2.557665 | 1.848575  | -0.338035 |
| C  | -1.672467 | -2.122548 | -1.790146 |
| H  | -2.394141 | -1.990158 | -2.605685 |
| H  | -2.109018 | -2.835350 | -1.083886 |
| H  | -0.789356 | -2.592367 | -2.236242 |
| C  | -0.601933 | 0.041877  | -2.234047 |
| H  | -1.253462 | 0.155533  | -3.110235 |
| H  | 0.296440  | -0.463750 | -2.592260 |
| H  | -0.325565 | 1.052777  | -1.927776 |
| C  | -0.871379 | -1.680647 | 2.811349  |
| H  | -1.608259 | -1.568482 | 3.615546  |
| H  | -0.008008 | -1.083883 | 3.109925  |
| H  | -0.580013 | -2.735516 | 2.794470  |
| C  | 0.480721  | -2.253234 | 0.169628  |
| H  | 0.823802  | -2.539042 | 1.169436  |
| H  | -0.065897 | -3.137770 | -0.172798 |
| C  | 0.462038  | 0.227494  | 0.632887  |
| H  | 0.717294  | 0.182552  | 1.696629  |
| H  | -0.087657 | 1.164969  | 0.542695  |
| C  | 1.749807  | -2.084999 | -0.663843 |
| H  | 2.311964  | -3.028279 | -0.631414 |
| H  | 1.485960  | -1.942949 | -1.715401 |
| C  | 1.792080  | 0.356905  | -0.134101 |
| H  | 1.613294  | 0.694442  | -1.155632 |
| C  | 2.636376  | -0.930464 | -0.156380 |
| Cl | 3.993600  | -0.758354 | -1.344415 |
| C  | 3.266130  | -1.297903 | 1.199256  |
| H  | 4.052469  | -0.595410 | 1.495315  |
| H  | 3.730511  | -2.290584 | 1.160638  |
| H  | 2.527601  | -1.315859 | 2.006306  |
| Br | 2.773176  | 1.896024  | 0.625217  |

SCF Energy (SMD/wB97XD/6-31+G\*\*) =  
-6264.2556922

SCF Energy (B3LYP/6-31G\*\*) =  
-6264.28729609

## 1I\_C013

## MMFF Geometry

|    |           |           |           |
|----|-----------|-----------|-----------|
| C  | 1.405029  | -0.571125 | 1.263984  |
| C  | 3.504234  | -0.918372 | -0.181529 |
| C  | 0.408728  | -1.022041 | 0.044281  |
| C  | 2.762480  | 0.034984  | 0.763084  |
| H  | 3.938361  | -1.732465 | 0.411180  |
| H  | 3.418197  | 0.245867  | 1.618260  |
| C  | 2.606014  | -1.547991 | -1.194949 |
| H  | 3.116111  | -2.019163 | -2.032946 |
| C  | 1.259919  | -1.621676 | -1.126096 |
| O  | 4.612358  | -0.294095 | -0.820257 |
| H  | 4.991162  | -0.922082 | -1.456051 |
| Br | 2.613238  | 1.832558  | -0.031287 |
| C  | 1.806194  | -1.823296 | 2.121916  |
| H  | 2.624080  | -1.581215 | 2.811563  |
| H  | 2.134063  | -2.664759 | 1.503866  |
| H  | 0.980245  | -2.179927 | 2.746196  |
| C  | 0.744020  | 0.397760  | 2.275142  |
| H  | 1.450260  | 0.669998  | 3.069165  |
| H  | -0.119750 | -0.059822 | 2.767968  |
| H  | 0.407482  | 1.331132  | 1.817957  |
| C  | 0.568036  | -2.350596 | -2.258575 |
| H  | 0.163616  | -3.304727 | -1.908220 |
| H  | 1.254584  | -2.586844 | -3.080114 |
| H  | -0.233607 | -1.753082 | -2.698606 |
| C  | -0.605413 | -2.100389 | 0.589723  |
| H  | -0.136305 | -3.092607 | 0.588550  |
| H  | -0.861031 | -1.885633 | 1.633471  |
| C  | -0.438790 | 0.169266  | -0.537106 |
| H  | -0.594236 | 0.055564  | -1.616515 |
| H  | 0.102294  | 1.108315  | -0.449987 |
| C  | -1.939919 | -2.191472 | -0.159955 |
| H  | -1.757398 | -2.494019 | -1.193367 |
| H  | -2.527766 | -3.015988 | 0.264921  |
| C  | -1.815355 | 0.326615  | 0.121707  |
| H  | -1.680023 | 0.465340  | 1.197732  |
| C  | -2.750904 | -0.873616 | -0.141881 |
| Cl | -3.939446 | -0.966934 | 1.227039  |
| C  | -3.568138 | -0.807236 | -1.442972 |
| H  | -4.316213 | -0.007903 | -1.432611 |
| H  | -4.115354 | -1.743256 | -1.610348 |
| H  | -2.917128 | -0.651025 | -2.310328 |
| Br | -2.582573 | 2.053272  | -0.418998 |

SCF Energy (SMD/wB97XD/6-31+G\*\*) =  
-6264.2524267

SCF Energy (B3LYP/6-31G\*\*) =  
-6264.28481075

## 1I\_C014

## MMFF Geometry

|    |           |           |           |
|----|-----------|-----------|-----------|
| C  | 1.553333  | 0.343053  | -0.558563 |
| C  | 2.907181  | -1.339536 | 0.888818  |
| C  | 0.145642  | -0.160734 | 0.134050  |
| C  | 2.715464  | 0.120960  | 0.467264  |
| H  | 3.486656  | -1.380580 | 1.818748  |
| H  | 2.524110  | 0.712486  | 1.368604  |
| C  | 1.606190  | -2.037306 | 1.090536  |
| H  | 1.704020  | -3.036877 | 1.512468  |
| C  | 0.383758  | -1.564195 | 0.771702  |
| O  | 3.611797  | -2.114580 | -0.078428 |
| H  | 4.396766  | -1.597399 | -0.334125 |
| Br | 4.463595  | 0.837733  | -0.111346 |
| C  | 1.487744  | 1.846719  | -0.942973 |
| H  | 2.342074  | 2.143553  | -1.561107 |
| H  | 1.488708  | 2.493445  | -0.059945 |
| H  | 0.601050  | 2.088806  | -1.534328 |
| C  | 1.823821  | -0.444925 | -1.874866 |
| H  | 2.835024  | -0.270310 | -2.255049 |
| H  | 1.147027  | -0.137643 | -2.679049 |
| H  | 1.699725  | -1.524274 | -1.749819 |
| C  | -0.791334 | -2.464771 | 1.058533  |
| H  | -0.512608 | -3.323910 | 1.679881  |
| H  | -1.199131 | -2.870249 | 0.129633  |
| H  | -1.569684 | -1.934705 | 1.605848  |
| C  | -0.270735 | 0.788889  | 1.303575  |
| H  | -0.638656 | 0.212208  | 2.161045  |
| H  | 0.591449  | 1.328539  | 1.705232  |
| C  | -0.980100 | -0.219097 | -0.967555 |
| H  | -0.958714 | -1.193924 | -1.471987 |
| H  | -0.694703 | 0.478711  | -1.762418 |
| C  | -1.329201 | 1.826559  | 0.936341  |
| H  | -1.475760 | 2.494562  | 1.795676  |
| H  | -0.961426 | 2.464131  | 0.124908  |
| C  | -2.430995 | 0.210245  | -0.648310 |
| H  | -2.767460 | 0.714950  | -1.565324 |
| C  | -2.659440 | 1.171419  | 0.540131  |
| Cl | -3.750698 | 2.525185  | -0.013474 |
| C  | -3.346792 | 0.584709  | 1.785391  |
| H  | -4.386029 | 0.297878  | 1.589316  |
| H  | -3.378327 | 1.319505  | 2.599596  |
| H  | -2.828459 | -0.293465 | 2.173742  |
| Br | -3.648320 | -1.328272 | -0.698354 |

SCF Energy (SMD/wB97XD/6-31+G\*\*) =  
-6264.2460585

SCF Energy (B3LYP/6-31G\*\*) =  
-6264.28493952

## 1l\_C015

## MMFF Geometry

|    |           |           |           |
|----|-----------|-----------|-----------|
| C  | 1.368932  | -0.329754 | 0.468409  |
| C  | 2.820980  | 1.592178  | -0.500121 |
| C  | -0.021048 | 0.441739  | 0.027793  |
| C  | 2.509459  | 0.093854  | -0.516420 |
| H  | 3.359383  | 1.865989  | -1.415179 |
| H  | 2.230139  | -0.193646 | -1.535465 |
| C  | 1.585090  | 2.413618  | -0.392585 |
| H  | 1.764011  | 3.482372  | -0.504880 |
| C  | 0.333026  | 1.965086  | -0.160667 |
| O  | 3.638298  | 1.986275  | 0.600120  |
| H  | 4.374163  | 1.349390  | 0.644062  |
| Br | 4.210707  | -0.889137 | -0.283281 |
| C  | 1.228177  | -1.867784 | 0.433953  |
| H  | 2.077165  | -2.364397 | 0.917263  |
| H  | 1.180656  | -2.249174 | -0.589123 |
| H  | 0.353082  | -2.209288 | 0.983126  |
| C  | 1.746007  | 0.041646  | 1.936303  |
| H  | 2.763066  | -0.275502 | 2.187555  |
| H  | 1.093417  | -0.453245 | 2.662946  |
| H  | 1.678874  | 1.115634  | 2.130637  |
| C  | -0.747581 | 3.019827  | -0.124570 |
| H  | -0.343279 | 4.032473  | -0.243595 |
| H  | -1.273782 | 3.023721  | 0.832017  |
| H  | -1.449746 | 2.881376  | -0.949024 |
| C  | -0.576913 | -0.017750 | -1.358699 |
| H  | -1.206700 | 0.777009  | -1.779882 |
| H  | 0.231758  | -0.122987 | -2.089332 |
| C  | -1.136195 | 0.216164  | 1.122845  |
| H  | -1.215677 | 1.088795  | 1.781416  |
| H  | -0.812970 | -0.581437 | 1.798026  |
| C  | -1.427045 | -1.291312 | -1.408565 |
| H  | -1.874289 | -1.327121 | -2.412030 |
| H  | -0.773108 | -2.167515 | -1.390407 |
| C  | -2.539934 | -0.232622 | 0.660637  |
| H  | -3.099081 | -0.532909 | 1.557274  |
| C  | -2.540657 | -1.401123 | -0.345896 |
| Cl | -2.239548 | -2.929565 | 0.619719  |
| C  | -3.898377 | -1.659877 | -1.025224 |
| H  | -4.709189 | -1.726404 | -0.290535 |
| H  | -3.887795 | -2.599933 | -1.591009 |
| H  | -4.153151 | -0.873775 | -1.743809 |
| Br | -3.626836 | 1.291126  | 0.077584  |

SCF Energy (SMD/wB97XD/6-31+G\*\*) =  
-6264.2431448

SCF Energy (B3LYP/6-31G\*\*) =  
-6264.28565196

## 1m\_C001

## MMFF Geometry

|    |           |           |           |
|----|-----------|-----------|-----------|
| C  | 1.492214  | 0.724255  | 0.497886  |
| C  | 2.452904  | -1.636593 | -0.034565 |
| C  | -0.018638 | 0.074639  | 0.606570  |
| C  | 2.320500  | -0.174387 | -0.478645 |
| H  | 2.671417  | -2.269830 | -0.902139 |
| H  | 1.841103  | -0.158060 | -1.464381 |
| C  | 1.235155  | -2.145901 | 0.660666  |
| H  | 1.320251  | -3.183648 | 0.981760  |
| C  | 0.142368  | -1.429255 | 1.001000  |
| O  | 3.513441  | -1.829700 | 0.903528  |
| H  | 4.285628  | -1.347081 | 0.557109  |
| Br | 4.118251  | 0.528198  | -0.901636 |
| C  | 2.146293  | 0.800353  | 1.906681  |
| H  | 3.196089  | 1.105713  | 1.850544  |
| H  | 2.112913  | -0.150377 | 2.445146  |
| H  | 1.643497  | 1.543361  | 2.535736  |
| C  | 1.478365  | 2.183436  | -0.049929 |
| H  | 2.432835  | 2.688603  | 0.139493  |
| H  | 0.716318  | 2.809357  | 0.417392  |
| H  | 1.318476  | 2.219017  | -1.132164 |
| C  | -0.858258 | -2.123515 | 1.896643  |
| H  | -0.906043 | -1.639722 | 2.876489  |
| H  | -0.587706 | -3.169037 | 2.086898  |
| H  | -1.855331 | -2.147955 | 1.466234  |
| C  | -0.846113 | 0.858510  | 1.676253  |
| H  | -0.548394 | 0.552246  | 2.687099  |
| H  | -0.602774 | 1.922910  | 1.642419  |
| C  | -0.715406 | 0.155156  | -0.806090 |
| H  | -0.335693 | -0.643727 | -1.456883 |
| H  | -0.396326 | 1.078135  | -1.297415 |
| C  | -2.373699 | 0.759821  | 1.575514  |
| H  | -2.712751 | -0.227344 | 1.899681  |
| H  | -2.807207 | 1.456963  | 2.306086  |
| C  | -2.248472 | 0.194099  | -0.892157 |
| H  | -2.516493 | 0.579789  | -1.885349 |
| C  | -2.926754 | 1.062711  | 0.178040  |
| Cl | -2.548558 | 2.805488  | -0.216330 |
| C  | -4.459646 | 0.968431  | 0.181233  |
| H  | -4.902449 | 1.714450  | 0.852377  |
| H  | -4.810051 | -0.007774 | 0.531790  |
| H  | -4.872084 | 1.137023  | -0.820102 |
| Br | -2.958027 | -1.629605 | -1.023594 |

SCF Energy (SMD/wB97XD/6-31+G\*\*) =  
-6264.2564372

SCF Energy (B3LYP/6-31G\*\*) =  
-6264.29816142

## 1m\_C002

## MMFF Geometry

|    |           |           |           |
|----|-----------|-----------|-----------|
| C  | -1.388911 | 0.125332  | 0.750817  |
| C  | -3.006018 | 0.835194  | -1.156595 |
| C  | -0.163082 | 0.955770  | 0.046449  |
| C  | -2.385720 | -0.323549 | -0.368469 |
| H  | -3.424653 | 0.456580  | -2.096691 |
| H  | -1.863497 | -0.977987 | -1.074897 |
| C  | -2.009217 | 1.900229  | -1.459097 |
| H  | -2.377076 | 2.665837  | -2.140944 |
| C  | -0.760025 | 1.992891  | -0.959128 |
| O  | -4.064714 | 1.486857  | -0.458964 |
| H  | -4.653353 | 0.785676  | -0.125730 |
| Br | -3.848167 | -1.494740 | 0.259314  |
| C  | -2.102280 | 1.018891  | 1.806997  |
| H  | -3.025433 | 0.560014  | 2.174328  |
| H  | -2.356880 | 2.008188  | 1.416525  |
| H  | -1.472554 | 1.177217  | 2.689397  |
| C  | -0.875989 | -1.125764 | 1.510902  |
| H  | -1.667290 | -1.590627 | 2.108991  |
| H  | -0.083276 | -0.882797 | 2.223058  |
| H  | -0.499965 | -1.891346 | 0.824968  |
| C  | 0.077267  | 3.162245  | -1.423713 |
| H  | -0.442469 | 3.774300  | -2.170099 |
| H  | 1.000860  | 2.819584  | -1.898017 |
| H  | 0.315456  | 3.828302  | -0.589700 |
| C  | 0.689667  | 1.665276  | 1.160415  |
| H  | 0.216861  | 2.612455  | 1.449936  |
| H  | 0.715308  | 1.061901  | 2.073326  |
| C  | 0.780528  | 0.024367  | -0.797020 |
| H  | 1.144856  | 0.546736  | -1.691837 |
| H  | 0.218931  | -0.827842 | -1.192999 |
| C  | 2.151365  | 1.937014  | 0.786195  |
| H  | 2.184690  | 2.643698  | -0.046303 |
| H  | 2.633041  | 2.473130  | 1.614797  |
| C  | 2.002849  | -0.473666 | -0.018086 |
| H  | 1.664515  | -1.030299 | 0.858968  |
| C  | 2.953665  | 0.664927  | 0.415785  |
| Cl | 3.840696  | 0.111801  | 1.900112  |
| C  | 4.018714  | 1.068788  | -0.617985 |
| H  | 4.577645  | 1.950696  | -0.281132 |
| H  | 3.558534  | 1.322440  | -1.579486 |
| H  | 4.758649  | 0.281175  | -0.793536 |
| Br | 2.882627  | -1.880408 | -1.072112 |

SCF Energy (SMD/wB97XD/6-31+G\*\*) =  
-6264.2589863

SCF Energy (B3LYP/6-31G\*\*) =  
-6264.29682376

## 1m\_C003

## MMFF Geometry

|    |           |           |           |
|----|-----------|-----------|-----------|
| C  | -1.355834 | 0.046347  | 0.728689  |
| C  | -3.079630 | 0.866708  | -1.049801 |
| C  | -0.194888 | 1.022941  | 0.085612  |
| C  | -2.368261 | -0.328504 | -0.411718 |
| H  | -3.537353 | 0.559179  | -1.997724 |
| H  | -1.831902 | -0.871446 | -1.198604 |
| C  | -2.139281 | 1.988493  | -1.305529 |
| H  | -2.557035 | 2.784462  | -1.920574 |
| C  | -0.878544 | 2.093600  | -0.841700 |
| O  | -4.117886 | 1.405900  | -0.236764 |
| H  | -4.674101 | 0.655379  | 0.039704  |
| Br | -3.755296 | -1.640478 | 0.112029  |
| C  | -2.082180 | 0.767240  | 1.897182  |
| H  | -2.987334 | 0.237375  | 2.209681  |
| H  | -2.371968 | 1.790577  | 1.641530  |
| H  | -1.443599 | 0.818883  | 2.786465  |
| C  | -0.797762 | -1.271439 | 1.317397  |
| H  | -1.554973 | -1.808093 | 1.900348  |
| H  | 0.021740  | -1.110095 | 2.013583  |
| H  | -0.463715 | -1.955883 | 0.531528  |
| C  | -0.103453 | 3.325974  | -1.268089 |
| H  | -0.574059 | 3.834158  | -2.117821 |
| H  | 0.912346  | 3.076103  | -1.584778 |
| H  | -0.054462 | 4.051308  | -0.449711 |
| C  | 0.631766  | 1.793490  | 1.177333  |
| H  | 1.120491  | 2.667668  | 0.736476  |
| H  | -0.021649 | 2.226633  | 1.940751  |
| C  | 0.803386  | 0.233231  | -0.833569 |
| H  | 1.243244  | 0.919342  | -1.568708 |
| H  | 0.255419  | -0.492614 | -1.445988 |
| C  | 1.764368  | 1.026741  | 1.858674  |
| H  | 2.298627  | 1.722795  | 2.520483  |
| H  | 1.350931  | 0.269985  | 2.529296  |
| C  | 1.965540  | -0.484483 | -0.126173 |
| H  | 1.602962  | -1.373211 | 0.393287  |
| C  | 2.753912  | 0.403722  | 0.853950  |
| Cl | 3.901955  | -0.612538 | 1.819872  |
| C  | 3.586404  | 1.506090  | 0.175900  |
| H  | 4.025353  | 2.181211  | 0.920319  |
| H  | 2.984956  | 2.118828  | -0.501619 |
| H  | 4.418678  | 1.098095  | -0.407268 |
| Br | 3.109981  | -1.278824 | -1.528123 |

SCF Energy (SMD/wB97XD/6-31+G\*\*) =  
-6264.2595556

SCF Energy (B3LYP/6-31G\*\*) =  
-6264.29710058

## 1m\_C004

## MMFF Geometry

|    |          |          |          |
|----|----------|----------|----------|
| C  | 1.49817  | 0.71709  | 0.51149  |
| C  | 2.48416  | -1.63149 | -0.01855 |
| C  | -0.00965 | 0.05880  | 0.61124  |
| C  | 2.33344  | -0.17271 | -0.46745 |
| H  | 2.74295  | -2.25425 | -0.88298 |
| H  | 1.83960  | -0.17010 | -1.44630 |
| C  | 1.25245  | -2.16252 | 0.64263  |
| H  | 1.31911  | -3.20902 | 0.93586  |
| C  | 0.15302  | -1.45369 | 0.97932  |
| O  | 3.52751  | -1.78140 | 0.94539  |
| H  | 3.68063  | -2.73261 | 1.06726  |
| Br | 4.10317  | 0.56521  | -0.93412 |
| C  | 2.14844  | 0.78710  | 1.92203  |
| H  | 3.20262  | 1.07765  | 1.86725  |
| H  | 2.09873  | -0.16182 | 2.46255  |
| H  | 1.65353  | 1.53773  | 2.54844  |
| C  | 1.47625  | 2.18104  | -0.02372 |
| H  | 2.42337  | 2.69389  | 0.18170  |
| H  | 0.70209  | 2.79466  | 0.44015  |
| H  | 1.32826  | 2.22495  | -1.10739 |
| C  | -0.86287 | -2.16672 | 1.84286  |
| H  | -0.92292 | -1.70653 | 2.83341  |
| H  | -0.59829 | -3.21743 | 2.01158  |
| H  | -1.85369 | -2.17735 | 1.39865  |
| C  | -0.83722 | 0.82153  | 1.69605  |
| H  | -0.54070 | 0.49311  | 2.70037  |
| H  | -0.59152 | 1.88602  | 1.68513  |
| C  | -0.70847 | 0.16100  | -0.79983 |
| H  | -0.33367 | -0.63197 | -1.46065 |
| H  | -0.38440 | 1.08751  | -1.28080 |
| C  | -2.36484 | 0.72800  | 1.59217  |
| H  | -2.70619 | -0.26501 | 1.89548  |
| H  | -2.79734 | 1.41064  | 2.33691  |
| C  | -2.24119 | 0.21212  | -0.88635 |
| H  | -2.50531 | 0.62116  | -1.87126 |
| C  | -2.91667 | 1.06109  | 0.20114  |
| Cl | -2.53366 | 2.80996  | -0.15800 |
| C  | -4.44994 | 0.97164  | 0.20288  |
| H  | -4.89024 | 1.70555  | 0.88887  |
| H  | -4.80337 | -0.01019 | 0.53417  |
| H  | -4.86211 | 1.16146  | -0.79476 |
| Br | -2.96259 | -1.60377 | -1.06177 |

SCF Energy (SMD/wB97XD/6-31+G\*\*) =  
-6264.2530983

SCF Energy (B3LYP/6-31G\*\*) =  
-6264.29061327

## 1m\_C005

## MMFF Geometry

|    |           |           |           |
|----|-----------|-----------|-----------|
| C  | 1.165276  | -0.114641 | -1.095166 |
| C  | 3.225388  | -1.491346 | -0.368067 |
| C  | 0.395778  | -0.409280 | 0.328879  |
| C  | 2.730652  | -0.173200 | -0.966807 |
| H  | 3.118488  | -2.294261 | -1.105552 |
| H  | 3.201918  | -0.041595 | -1.949625 |
| C  | 2.457109  | -1.885423 | 0.842386  |
| H  | 2.949888  | -2.632513 | 1.463976  |
| C  | 1.234275  | -1.432003 | 1.184071  |
| O  | 4.610987  | -1.460515 | -0.040721 |
| H  | 4.752029  | -0.657227 | 0.493876  |
| Br | 3.517976  | 1.343288  | 0.033938  |
| C  | 0.800697  | 1.219743  | -1.789048 |
| H  | 1.358268  | 1.330995  | -2.728131 |
| H  | 1.045513  | 2.095671  | -1.185022 |
| H  | -0.254937 | 1.276142  | -2.059116 |
| C  | 0.797754  | -1.210387 | -2.148989 |
| H  | 1.429060  | -1.126671 | -3.042245 |
| H  | -0.236585 | -1.109951 | -2.494885 |
| H  | 0.923544  | -2.224768 | -1.758086 |
| C  | 0.645994  | -2.005320 | 2.462818  |
| H  | 1.413766  | -2.470740 | 3.092270  |
| H  | -0.089240 | -2.782750 | 2.232507  |
| H  | 0.168747  | -1.244326 | 3.082690  |
| C  | 0.175537  | 0.883671  | 1.192356  |
| H  | 0.004199  | 0.612632  | 2.238923  |
| H  | 1.077745  | 1.494141  | 1.226800  |
| C  | -1.020724 | -1.065026 | 0.126223  |
| H  | -1.370578 | -1.491187 | 1.073178  |
| H  | -0.954520 | -1.940269 | -0.529714 |
| C  | -0.999317 | 1.797211  | 0.803779  |
| H  | -1.098830 | 2.570387  | 1.578469  |
| H  | -0.756459 | 2.351640  | -0.105375 |
| C  | -2.125191 | -0.117407 | -0.345778 |
| H  | -1.911740 | 0.239203  | -1.355475 |
| C  | -2.340761 | 1.062549  | 0.622118  |
| Cl | -3.497239 | 2.251742  | -0.107690 |
| C  | -2.905164 | 0.672298  | 2.000069  |
| H  | -2.976553 | 1.548280  | 2.656434  |
| H  | -2.274359 | -0.058179 | 2.514791  |
| H  | -3.912191 | 0.248416  | 1.932054  |
| Br | -3.759857 | -1.191208 | -0.611347 |

SCF Energy (SMD/wB97XD/6-31+G\*\*) =  
-6264.2586267

SCF Energy (B3LYP/6-31G\*\*) =  
-6264.29563596

## 1m\_C006

## MMFF Geometry

|    |           |           |           |
|----|-----------|-----------|-----------|
| C  | -1.394553 | 0.112874  | 0.760560  |
| C  | -3.035487 | 0.857059  | -1.110962 |
| C  | -0.174172 | 0.951141  | 0.055717  |
| C  | -2.400990 | -0.317622 | -0.357772 |
| H  | -3.493832 | 0.487566  | -2.036196 |
| H  | -1.874659 | -0.942055 | -1.088300 |
| C  | -2.028227 | 1.910064  | -1.438062 |
| H  | -2.380221 | 2.669783  | -2.133912 |
| C  | -0.773495 | 1.991209  | -0.949098 |
| O  | -4.058983 | 1.499803  | -0.355729 |
| H  | -4.456681 | 2.184062  | -0.918511 |
| Br | -3.825144 | -1.543671 | 0.243025  |
| C  | -2.098796 | 0.991316  | 1.834856  |
| H  | -3.029695 | 0.535887  | 2.187112  |
| H  | -2.336651 | 1.993440  | 1.467007  |
| H  | -1.470001 | 1.120600  | 2.722746  |
| C  | -0.874582 | -1.146354 | 1.502582  |
| H  | -1.659984 | -1.616711 | 2.104232  |
| H  | -0.075609 | -0.909615 | 2.209949  |
| H  | -0.504685 | -1.905196 | 0.805991  |
| C  | 0.074648  | 3.147394  | -1.428367 |
| H  | -0.440065 | 3.755451  | -2.181460 |
| H  | 0.995574  | 2.792870  | -1.898832 |
| H  | 0.317779  | 3.820617  | -0.601477 |
| C  | 0.678528  | 1.659566  | 1.170067  |
| H  | 0.202986  | 2.604382  | 1.462926  |
| H  | 0.707342  | 1.052695  | 2.080692  |
| C  | 0.770578  | 0.022559  | -0.791111 |
| H  | 1.129007  | 0.544360  | -1.688374 |
| H  | 0.210794  | -0.832258 | -1.184229 |
| C  | 2.138998  | 1.937708  | 0.796005  |
| H  | 2.169601  | 2.651388  | -0.030520 |
| H  | 2.619739  | 2.469095  | 1.628220  |
| C  | 1.998361  | -0.470864 | -0.017609 |
| H  | 1.667026  | -1.031775 | 0.859284  |
| C  | 2.945371  | 0.671333  | 0.414894  |
| Cl | 3.846263  | 0.117560  | 1.890524  |
| C  | 4.001146  | 1.085422  | -0.624568 |
| H  | 4.557389  | 1.969134  | -0.287965 |
| H  | 3.533041  | 1.340289  | -1.581903 |
| H  | 4.744418  | 0.302850  | -0.808344 |
| Br | 2.881967  | -1.869775 | -1.079711 |

SCF Energy (SMD/wB97XD/6-31+G\*\*) =  
-6264.2552726

SCF Energy (B3LYP/6-31G\*\*) =  
-6264.28868662

## 1m\_C007

## MMFF Geometry

|    |           |           |           |
|----|-----------|-----------|-----------|
| C  | -1.359012 | 0.027728  | 0.733095  |
| C  | -3.111569 | 0.882220  | -0.998751 |
| C  | -0.206509 | 1.014304  | 0.089279  |
| C  | -2.386593 | -0.326072 | -0.400784 |
| H  | -3.613498 | 0.581272  | -1.926282 |
| H  | -1.851963 | -0.837029 | -1.210416 |
| C  | -2.161099 | 1.992451  | -1.286002 |
| H  | -2.564526 | 2.782527  | -1.917203 |
| C  | -0.893551 | 2.086569  | -0.837772 |
| O  | -4.106075 | 1.411810  | -0.127408 |
| H  | -4.549024 | 2.140344  | -0.592477 |
| Br | -3.735474 | -1.684459 | 0.092044  |
| C  | -2.069553 | 0.726843  | 1.923533  |
| H  | -2.974308 | 0.193744  | 2.232337  |
| H  | -2.355603 | 1.757187  | 1.692997  |
| H  | -1.421404 | 0.757298  | 2.806984  |
| C  | -0.791510 | -1.298322 | 1.294661  |
| H  | -1.540466 | -1.845240 | 1.878785  |
| H  | 0.035555  | -1.145480 | 1.984154  |
| H  | -0.464771 | -1.969797 | 0.494592  |
| C  | -0.107711 | 3.305897  | -1.284286 |
| H  | -0.048499 | 4.041058  | -0.475373 |
| H  | -0.577828 | 3.807484  | -2.138195 |
| H  | 0.904632  | 3.044936  | -1.602133 |
| C  | 0.617095  | 1.787440  | 1.180752  |
| H  | 1.102723  | 2.663670  | 0.740527  |
| H  | -0.037980 | 2.218114  | 1.944231  |
| C  | 0.794858  | 0.228054  | -0.831528 |
| H  | 1.229019  | 0.913822  | -1.569821 |
| H  | 0.248909  | -0.502035 | -1.440916 |
| C  | 1.750141  | 1.021768  | 1.862184  |
| H  | 2.279680  | 1.716553  | 2.529054  |
| H  | 1.336843  | 0.259880  | 2.527291  |
| C  | 1.963963  | -0.482404 | -0.127383 |
| H  | 1.610444  | -1.377713 | 0.386908  |
| C  | 2.744928  | 0.407809  | 0.856962  |
| Cl | 3.898529  | -0.603710 | 1.821081  |
| C  | 3.571495  | 1.517583  | 0.183509  |
| H  | 4.002168  | 2.195250  | 0.930441  |
| H  | 2.968000  | 2.126179  | -0.495880 |
| H  | 4.409371  | 1.116939  | -0.396758 |
| Br | 3.115870  | -1.259015 | -1.533951 |

SCF Energy (SMD/wB97XD/6-31+G\*\*) =  
-6264.2558367

SCF Energy (B3LYP/6-31G\*\*) =  
-6264.28908719

| <b>1m_C008</b>       |           |           |           |
|----------------------|-----------|-----------|-----------|
| <b>MMFF Geometry</b> |           |           |           |
| C                    | -1.445460 | 0.121704  | 1.304867  |
| C                    | -3.003297 | -1.642423 | 0.274306  |
| C                    | -0.199758 | -0.287877 | 0.300445  |
| C                    | -2.852610 | -0.175158 | 0.689649  |
| H                    | -3.219927 | -2.236592 | 1.170255  |
| H                    | -3.639447 | 0.053914  | 1.420429  |
| C                    | -1.773166 | -2.223360 | -0.334805 |
| H                    | -1.929021 | -3.206651 | -0.778709 |
| C                    | -0.535106 | -1.683561 | -0.328636 |
| O                    | -4.098487 | -1.873898 | -0.604102 |
| H                    | -4.033295 | -1.204301 | -1.309790 |
| Br                   | -3.372150 | 1.022542  | -0.788939 |
| C                    | -1.400550 | 1.594237  | 1.800650  |
| H                    | -2.220199 | 1.783952  | 2.505257  |
| H                    | -1.505406 | 2.332290  | 1.003710  |
| H                    | -0.474083 | 1.823932  | 2.333920  |
| C                    | -1.371092 | -0.734396 | 2.621311  |
| H                    | -2.294902 | -0.635233 | 3.204426  |
| H                    | -0.560236 | -0.411615 | 3.282336  |
| H                    | -1.221163 | -1.799774 | 2.423179  |
| C                    | 0.542482  | -2.504014 | -0.987634 |
| H                    | 0.132649  | -3.345900 | -1.558742 |
| H                    | 1.197928  | -2.939727 | -0.230781 |
| H                    | 1.117549  | -1.917520 | -1.702408 |
| C                    | -0.074762 | 0.712862  | -0.894630 |
| H                    | -0.709884 | 0.388246  | -1.728788 |
| H                    | -0.458376 | 1.694663  | -0.614934 |
| C                    | 1.129536  | -0.324349 | 1.164209  |
| H                    | 1.245390  | -1.318624 | 1.615755  |
| H                    | 0.983119  | 0.339810  | 2.021690  |
| C                    | 1.315575  | 0.958059  | -1.485398 |
| H                    | 1.630754  | 0.090470  | -2.072782 |
| H                    | 1.234786  | 1.777997  | -2.212584 |
| C                    | 2.475569  | 0.166859  | 0.592524  |
| H                    | 3.086488  | 0.512590  | 1.438120  |
| C                    | 2.377080  | 1.296745  | -0.439098 |
| Cl                   | 1.875551  | 2.809627  | 0.445471  |
| C                    | 3.705438  | 1.651425  | -1.125020 |
| H                    | 3.608784  | 2.560023  | -1.732020 |
| H                    | 4.041027  | 0.863291  | -1.806833 |
| H                    | 4.499679  | 1.827066  | -0.390463 |
| Br                   | 3.573636  | -1.347265 | -0.009257 |

**SCF Energy (SMD/wB97XD/6-31+G\*\*) =**  
**-6264.2445028**  
**SCF Energy (B3LYP/6-31G\*\*) =**  
**-6264.28759237**

| <b>1m_C009</b>       |           |           |           |
|----------------------|-----------|-----------|-----------|
| <b>MMFF Geometry</b> |           |           |           |
| C                    | 1.196271  | -0.568185 | -1.083506 |
| C                    | 3.351580  | -1.379565 | 0.066846  |
| C                    | 0.382316  | -0.527532 | 0.345236  |
| C                    | 2.736033  | -0.354525 | -0.892254 |
| H                    | 3.488970  | -2.324798 | -0.471693 |
| H                    | 3.255461  | -0.438581 | -1.855950 |
| C                    | 2.497263  | -1.680019 | 1.250522  |
| H                    | 3.004469  | -2.256988 | 2.023554  |
| C                    | 1.200091  | -1.343005 | 1.410265  |
| O                    | 4.648553  | -1.013346 | 0.523600  |
| H                    | 4.585614  | -0.088522 | 0.825932  |
| Br                   | 3.232215  | 1.480409  | -0.364827 |
| C                    | 0.687571  | 0.411818  | -2.173208 |
| H                    | 1.356045  | 0.393454  | -3.043859 |
| H                    | 0.633661  | 1.451822  | -1.849627 |
| H                    | -0.296035 | 0.126721  | -2.554536 |
| C                    | 1.048773  | -1.979472 | -1.752853 |
| H                    | 1.775823  | -2.107002 | -2.564409 |
| H                    | 0.062196  | -2.115339 | -2.209270 |
| H                    | 1.199466  | -2.800319 | -1.045387 |
| C                    | 0.554055  | -1.766931 | 2.712749  |
| H                    | 1.270418  | -2.245871 | 3.391143  |
| H                    | -0.238664 | -2.500491 | 2.544660  |
| H                    | 0.154716  | -0.911254 | 3.257671  |
| C                    | 0.227979  | 0.934803  | 0.904986  |
| H                    | 1.054716  | 1.172230  | 1.585866  |
| H                    | 0.272577  | 1.676976  | 0.107260  |
| C                    | -1.067384 | -1.131092 | 0.198508  |
| H                    | -1.430092 | -1.525025 | 1.153897  |
| H                    | -1.067830 | -2.007191 | -0.454031 |
| C                    | -1.077558 | 1.203999  | 1.665232  |
| H                    | -1.119844 | 0.550726  | 2.541442  |
| H                    | -1.049707 | 2.222590  | 2.074844  |
| C                    | -2.105031 | -0.098492 | -0.255487 |
| H                    | -1.777446 | 0.355546  | -1.189933 |
| C                    | -2.350751 | 0.996801  | 0.810032  |
| Cl                   | -2.706387 | 2.549801  | -0.057836 |
| C                    | -3.519959 | 0.747983  | 1.777194  |
| H                    | -3.548462 | 1.512729  | 2.563314  |
| H                    | -3.421397 | -0.223878 | 2.273819  |
| H                    | -4.494023 | 0.779026  | 1.277814  |
| Br                   | -3.729872 | -1.044293 | -0.820706 |

**SCF Energy (SMD/wB97XD/6-31+G\*\*) =**  
**-6264.2510379**  
**SCF Energy (B3LYP/6-31G\*\*) =**  
**-6264.28849797**



| <b>1m_C010</b>       |           |           |           |
|----------------------|-----------|-----------|-----------|
| <b>MMFF Geometry</b> |           |           |           |
| C                    | 1.167765  | -0.098193 | -1.088827 |
| C                    | 3.226727  | -1.474183 | -0.365485 |
| C                    | 0.399785  | -0.390177 | 0.336215  |
| C                    | 2.734740  | -0.150973 | -0.956923 |
| H                    | 3.087871  | -2.274298 | -1.101336 |
| H                    | 3.205361  | -0.016592 | -1.939784 |
| C                    | 2.470771  | -1.853744 | 0.861334  |
| H                    | 2.960514  | -2.582213 | 1.504464  |
| C                    | 1.246371  | -1.400247 | 1.200825  |
| O                    | 4.625128  | -1.451263 | -0.099345 |
| H                    | 4.865290  | -2.289149 | 0.328186  |
| Br                   | 3.504287  | 1.374052  | 0.041356  |
| C                    | 0.798351  | 1.232574  | -1.787862 |
| H                    | 1.357834  | 1.343617  | -2.725825 |
| H                    | 1.036417  | 2.112003  | -1.186250 |
| H                    | -0.257022 | 1.282200  | -2.060885 |
| C                    | 0.802740  | -1.197204 | -2.140467 |
| H                    | 1.436228  | -1.115799 | -3.032373 |
| H                    | -0.230876 | -1.098154 | -2.488897 |
| H                    | 0.926603  | -2.210714 | -1.746934 |
| C                    | 0.665545  | -1.953763 | 2.492247  |
| H                    | 1.436263  | -2.412527 | 3.122994  |
| H                    | -0.072763 | -2.732897 | 2.278307  |
| H                    | 0.194595  | -1.183982 | 3.105711  |
| C                    | 0.164695  | 0.908496  | 1.188495  |
| H                    | -0.006538 | 0.645433  | 2.236836  |
| H                    | 1.060534  | 1.528340  | 1.219933  |
| C                    | -1.009908 | -1.060804 | 0.136841  |
| H                    | -1.357350 | -1.482257 | 1.086769  |
| H                    | -0.934367 | -1.940897 | -0.511544 |
| C                    | -1.018501 | 1.807467  | 0.790714  |
| H                    | -1.127272 | 2.585394  | 1.559389  |
| H                    | -0.779672 | 2.357628  | -0.122069 |
| C                    | -2.121871 | -0.127255 | -0.345681 |
| H                    | -1.908695 | 0.224155  | -1.357338 |
| C                    | -2.351860 | 1.057810  | 0.612470  |
| Cl                   | -3.519848 | 2.228656  | -0.128757 |
| C                    | -2.914924 | 0.672334  | 1.992328  |
| H                    | -2.997487 | 1.552717  | 2.641457  |
| H                    | -2.277224 | -0.046903 | 2.514332  |
| H                    | -3.917009 | 0.236702  | 1.925552  |
| Br                   | -3.745070 | -1.219529 | -0.607767 |

**SCF Energy (SMD/wB97XD/6-31+G\*\*) =**  
**-6264.2546462**  
**SCF Energy (B3LYP/6-31G\*\*) =**  
**-6264.28729176**

| <b>1m_C011</b>       |           |           |           |
|----------------------|-----------|-----------|-----------|
| <b>MMFF Geometry</b> |           |           |           |
| C                    | -1.448417 | 0.138284  | 1.294234  |
| C                    | -3.015528 | -1.621422 | 0.271095  |
| C                    | -0.203352 | -0.280074 | 0.293693  |
| C                    | -2.856026 | -0.150195 | 0.672503  |
| H                    | -3.215330 | -2.202567 | 1.180076  |
| H                    | -3.642420 | 0.087827  | 1.401154  |
| C                    | -1.786869 | -2.210429 | -0.343743 |
| H                    | -1.928739 | -3.194030 | -0.788191 |
| C                    | -0.546191 | -1.674874 | -0.335662 |
| O                    | -4.146534 | -1.841508 | -0.563977 |
| H                    | -4.111017 | -2.752621 | -0.896006 |
| Br                   | -3.355669 | 1.058656  | -0.801920 |
| C                    | -1.394624 | 1.610833  | 1.790209  |
| H                    | -2.216412 | 1.806772  | 2.490611  |
| H                    | -1.489063 | 2.350198  | 0.993253  |
| H                    | -0.469150 | 1.833215  | 2.328358  |
| C                    | -1.382736 | -0.716380 | 2.612353  |
| H                    | -2.309610 | -0.614981 | 3.190163  |
| H                    | -0.575080 | -0.393921 | 3.277518  |
| H                    | -1.232494 | -1.782168 | 2.416737  |
| C                    | 0.529900  | -2.496657 | -0.996257 |
| H                    | 0.118377  | -3.333648 | -1.573284 |
| H                    | 1.180904  | -2.939355 | -0.239645 |
| H                    | 1.109783  | -1.909440 | -1.706339 |
| C                    | -0.066470 | 0.719970  | -0.900867 |
| H                    | -0.700054 | 0.399271  | -1.737693 |
| H                    | -0.444691 | 1.704201  | -0.622493 |
| C                    | 1.123066  | -0.326061 | 1.161732  |
| H                    | 1.230702  | -1.321390 | 1.613007  |
| H                    | 0.978494  | 0.338549  | 2.019153  |
| C                    | 1.327432  | 0.957831  | -1.486144 |
| H                    | 1.639450  | 0.089783  | -2.074462 |
| H                    | 1.254185  | 1.779718  | -2.211950 |
| C                    | 2.474290  | 0.156400  | 0.594998  |
| H                    | 3.084508  | 0.497287  | 1.443087  |
| C                    | 2.387544  | 1.287812  | -0.435903 |
| Cl                   | 1.895218  | 2.803418  | 0.448854  |
| C                    | 3.720862  | 1.633062  | -1.117105 |
| H                    | 3.633046  | 2.542831  | -1.723699 |
| H                    | 4.052815  | 0.842954  | -1.798419 |
| H                    | 4.513959  | 1.802166  | -0.379779 |
| Br                   | 3.564644  | -1.365093 | -0.002956 |

**SCF Energy (SMD/wB97XD/6-31+G\*\*) =**  
**-6264.2404566**  
**SCF Energy (B3LYP/6-31G\*\*) =**  
**-6264.27903519**

**1n\_C001****MMFF Geometry**

|    |           |           |           |
|----|-----------|-----------|-----------|
| C  | 1.507736  | 0.630675  | -0.740727 |
| C  | 2.757028  | 0.216930  | 1.483696  |
| C  | 0.124504  | 0.930452  | 0.089882  |
| C  | 2.372825  | -0.347243 | 0.114064  |
| H  | 3.643170  | 0.860259  | 1.419099  |
| H  | 1.861551  | -1.309960 | 0.232264  |
| C  | 1.667265  | 1.014313  | 2.116994  |
| H  | 1.895555  | 1.343804  | 3.129898  |
| C  | 0.500715  | 1.372044  | 1.540622  |
| O  | 3.069167  | -0.842643 | 2.386478  |
| H  | 3.803305  | -1.342443 | 1.986612  |
| Br | 4.054047  | -0.907470 | -0.775403 |
| C  | 2.264046  | 1.962417  | -1.017127 |
| H  | 3.236323  | 1.789837  | -1.489254 |
| H  | 2.444823  | 2.543135  | -0.108295 |
| H  | 1.703036  | 2.601927  | -1.707190 |
| C  | 1.236961  | -0.020309 | -2.128614 |
| H  | 2.121804  | 0.030003  | -2.773628 |
| H  | 0.437066  | 0.473835  | -2.683332 |
| H  | 0.974654  | -1.079645 | -2.041170 |
| C  | -0.416566 | 2.249912  | 2.357070  |
| H  | -0.011625 | 2.456547  | 3.354928  |
| H  | -1.387946 | 1.781758  | 2.517771  |
| H  | -0.551864 | 3.223271  | 1.877142  |
| C  | -0.699252 | 2.037899  | -0.650442 |
| H  | -0.257875 | 3.024458  | -0.457389 |
| H  | -0.621043 | 1.907328  | -1.732788 |
| C  | -0.717886 | -0.386010 | 0.196768  |
| H  | -0.261900 | -1.059256 | 0.935574  |
| H  | -0.674212 | -0.934136 | -0.748378 |
| C  | -2.200602 | 2.123969  | -0.339806 |
| H  | -2.351562 | 2.593684  | 0.636746  |
| H  | -2.658311 | 2.821304  | -1.055448 |
| C  | -2.196780 | -0.207309 | 0.553543  |
| H  | -2.293638 | 0.111180  | 1.594894  |
| C  | -2.939291 | 0.773632  | -0.373116 |
| Cl | -2.965058 | 0.193156  | -2.086606 |
| C  | -4.395478 | 1.003456  | 0.061224  |
| H  | -5.010307 | 0.103969  | -0.045391 |
| H  | -4.868684 | 1.789013  | -0.539963 |
| H  | -4.446442 | 1.319125  | 1.109524  |
| Br | -3.027321 | -1.998830 | 0.586377  |

**SCF Energy (SMD/wB97XD/6-31+G\*\*) =**  
**-6264.2658995**

**SCF Energy (B3LYP/6-31G\*\*) =**  
**-6264.30299546**

**1n\_C002****MMFF Geometry**

|    |           |           |           |
|----|-----------|-----------|-----------|
| C  | 1.526586  | 0.709790  | -0.660697 |
| C  | 2.729872  | -0.004125 | 1.520796  |
| C  | 0.135200  | 0.916578  | 0.183859  |
| C  | 2.380306  | -0.373641 | 0.074671  |
| H  | 3.642350  | 0.602283  | 1.561224  |
| H  | 1.868549  | -1.342972 | 0.047260  |
| C  | 1.651674  | 0.754087  | 2.223068  |
| H  | 1.882979  | 0.984961  | 3.262882  |
| C  | 0.499087  | 1.193198  | 1.677253  |
| O  | 2.978091  | -1.179151 | 2.292722  |
| H  | 2.142101  | -1.671028 | 2.360042  |
| Br | 4.073468  | -0.805011 | -0.862285 |
| C  | 2.292296  | 2.060715  | -0.764479 |
| H  | 3.261710  | 1.945028  | -1.259201 |
| H  | 2.480899  | 2.516468  | 0.211481  |
| H  | 1.734561  | 2.788439  | -1.363695 |
| C  | 1.266933  | 0.234194  | -2.120800 |
| H  | 2.161391  | 0.347760  | -2.744028 |
| H  | 0.483252  | 0.803316  | -2.624002 |
| H  | 0.988270  | -0.823609 | -2.164466 |
| C  | -0.407683 | 2.006706  | 2.569239  |
| H  | -0.006313 | 2.108054  | 3.584629  |
| H  | -1.388302 | 1.542270  | 2.678216  |
| H  | -0.522393 | 3.024232  | 2.185311  |
| C  | -0.684208 | 2.098933  | -0.437384 |
| H  | -0.242943 | 3.058554  | -0.138111 |
| H  | -0.601734 | 2.085580  | -1.526891 |
| C  | -0.708199 | -0.401546 | 0.138461  |
| H  | -0.254501 | -1.155434 | 0.796396  |
| H  | -0.663929 | -0.838444 | -0.863093 |
| C  | -2.187464 | 2.153920  | -0.127451 |
| H  | -2.342954 | 2.519640  | 0.891938  |
| H  | -2.640909 | 2.922856  | -0.768591 |
| C  | -2.186701 | -0.258216 | 0.513557  |
| H  | -2.280947 | -0.048155 | 1.582530  |
| C  | -2.927457 | 0.815492  | -0.305245 |
| Cl | -2.949825 | 0.418643  | -2.069798 |
| C  | -4.384214 | 0.999181  | 0.148315  |
| H  | -4.999348 | 0.116522  | -0.054169 |
| H  | -4.855742 | 1.844419  | -0.367125 |
| H  | -4.437002 | 1.201992  | 1.224074  |
| Br | -3.018122 | -2.042077 | 0.363234  |

**SCF Energy (SMD/wB97XD/6-31+G\*\*) =**  
**-6264.2641691**

**SCF Energy (B3LYP/6-31G\*\*) =**  
**-6264.29794241**

**1n\_C003****MMFF Geometry**

|    |           |           |           |
|----|-----------|-----------|-----------|
| C  | 1.520348  | 0.702946  | -0.671591 |
| C  | 2.722761  | -0.016295 | 1.509842  |
| C  | 0.132457  | 0.914422  | 0.175294  |
| C  | 2.370875  | -0.382258 | 0.064229  |
| H  | 3.647649  | 0.572101  | 1.551141  |
| H  | 1.861660  | -1.352924 | 0.033237  |
| C  | 1.652680  | 0.754819  | 2.212045  |
| H  | 1.874754  | 0.988334  | 3.251931  |
| C  | 0.502635  | 1.200959  | 1.665422  |
| O  | 2.937419  | -1.211855 | 2.259340  |
| H  | 3.358914  | -0.958068 | 3.097125  |
| Br | 4.071725  | -0.804904 | -0.872001 |
| C  | 2.289050  | 2.051939  | -0.779544 |
| H  | 3.254160  | 1.934755  | -1.282196 |
| H  | 2.486776  | 2.505893  | 0.195433  |
| H  | 1.728800  | 2.781893  | -1.373642 |
| C  | 1.257344  | 0.224740  | -2.130277 |
| H  | 2.152177  | 0.331350  | -2.754167 |
| H  | 0.477012  | 0.797027  | -2.635031 |
| H  | 0.972753  | -0.831564 | -2.171111 |
| C  | -0.401132 | 2.019979  | 2.555049  |
| H  | 0.002665  | 2.126932  | 3.568884  |
| H  | -1.381814 | 1.556827  | 2.669067  |
| H  | -0.515744 | 3.035546  | 2.165933  |
| C  | -0.689014 | 2.093580  | -0.449246 |
| H  | -0.245956 | 3.054788  | -0.157863 |
| H  | -0.611980 | 2.073661  | -1.538990 |
| C  | -0.711605 | -0.404117 | 0.138713  |
| H  | -0.255551 | -1.155518 | 0.797763  |
| H  | -0.671673 | -0.844646 | -0.861453 |
| C  | -2.190562 | 2.151190  | -0.132144 |
| H  | -2.341309 | 2.522556  | 0.885835  |
| H  | -2.646577 | 2.917119  | -0.775096 |
| C  | -2.188135 | -0.259348 | 0.519406  |
| H  | -2.277680 | -0.046055 | 1.588198  |
| C  | -2.932094 | 0.812377  | -0.299552 |
| Cl | -2.965983 | 0.410011  | -2.063084 |
| C  | -4.386130 | 0.999652  | 0.161768  |
| H  | -5.003750 | 0.117270  | -0.034212 |
| H  | -4.859462 | 1.843821  | -0.353785 |
| H  | -4.432435 | 1.206188  | 1.237119  |
| Br | -3.024522 | -2.041958 | 0.376490  |

**SCF Energy (SMD/wB97XD/6-31+G\*\*) =**  
**-6264.2631188**

**SCF Energy (B3LYP/6-31G\*\*) =**  
**-6264.29662416**

**1n\_C004****MMFF Geometry**

|    |           |           |           |
|----|-----------|-----------|-----------|
| C  | -1.453466 | 0.387721  | -1.080604 |
| C  | -3.261309 | 1.224242  | 0.612970  |
| C  | -0.339021 | 0.431058  | 0.108879  |
| C  | -2.915975 | 0.266789  | -0.537189 |
| H  | -3.915639 | 0.757087  | 1.357809  |
| H  | -3.610327 | 0.447841  | -1.369016 |
| C  | -2.090238 | 1.801657  | 1.336064  |
| H  | -2.362934 | 2.559668  | 2.069730  |
| C  | -0.789072 | 1.501447  | 1.145490  |
| O  | -3.989218 | 2.344353  | 0.097052  |
| H  | -4.865983 | 2.017696  | -0.168589 |
| Br | -3.461252 | -1.560266 | -0.025932 |
| C  | -1.195898 | -0.712229 | -2.151291 |
| H  | -2.016743 | -0.736427 | -2.879277 |
| H  | -1.110600 | -1.718011 | -1.736688 |
| H  | -0.285821 | -0.526326 | -2.729396 |
| C  | -1.405647 | 1.727211  | -1.895727 |
| H  | -2.214496 | 1.763141  | -2.635808 |
| H  | -0.470412 | 1.829388  | -2.456459 |
| H  | -1.506759 | 2.614270  | -1.264400 |
| C  | 0.215865  | 2.273287  | 1.963995  |
| H  | -0.263195 | 2.999502  | 2.631337  |
| H  | 0.884637  | 2.849635  | 1.318550  |
| H  | 0.800715  | 1.612582  | 2.605633  |
| C  | -0.257495 | -0.934768 | 0.861623  |
| H  | -1.104168 | -1.039465 | 1.550270  |
| H  | -0.343623 | -1.764445 | 0.156975  |
| C  | 1.061087  | 0.761356  | -0.521534 |
| H  | 1.097647  | 1.823769  | -0.797634 |
| H  | 1.168222  | 0.218831  | -1.465485 |
| C  | 1.007471  | -1.190886 | 1.687446  |
| H  | 0.998942  | -0.544007 | 2.571650  |
| H  | 0.960217  | -2.215492 | 2.081400  |
| C  | 2.302441  | 0.435641  | 0.322578  |
| H  | 2.409377  | 1.156841  | 1.135897  |
| C  | 2.315072  | -0.988659 | 0.901873  |
| Cl | 2.400845  | -2.242887 | -0.398118 |
| C  | 3.499310  | -1.223008 | 1.852524  |
| H  | 4.463301  | -1.185014 | 1.335008  |
| H  | 3.431264  | -2.205206 | 2.335261  |
| H  | 3.518959  | -0.469227 | 2.647895  |
| Br | 3.897768  | 0.833479  | -0.772515 |

**SCF Energy (SMD/wB97XD/6-31+G\*\*) =**  
**-6264.2595733**

**SCF Energy (B3LYP/6-31G\*\*) =**  
**-6264.29475605**

## 1n\_C005

## MMFF Geometry

|    |           |           |           |
|----|-----------|-----------|-----------|
| C  | -1.449270 | 0.367384  | -1.087341 |
| C  | -3.284380 | 1.263801  | 0.530491  |
| C  | -0.352611 | 0.392324  | 0.122624  |
| C  | -2.923191 | 0.260773  | -0.572295 |
| H  | -4.038508 | 0.854268  | 1.211886  |
| H  | -3.601915 | 0.412210  | -1.422827 |
| C  | -2.128269 | 1.759171  | 1.339297  |
| H  | -2.401352 | 2.477970  | 2.110369  |
| C  | -0.829644 | 1.423621  | 1.191155  |
| O  | -3.888516 | 2.409823  | -0.080371 |
| H  | -4.157081 | 3.014110  | 0.631627  |
| Br | -3.469631 | -1.545347 | 0.004739  |
| C  | -1.190433 | -0.733209 | -2.157277 |
| H  | -1.972761 | -0.708027 | -2.926530 |
| H  | -1.181846 | -1.747241 | -1.754397 |
| H  | -0.241838 | -0.589897 | -2.682558 |
| C  | -1.367269 | 1.709008  | -1.896484 |
| H  | -2.183681 | 1.777408  | -2.625723 |
| H  | -0.436446 | 1.782872  | -2.469244 |
| H  | -1.426406 | 2.594516  | -1.257526 |
| C  | 0.158614  | 2.116749  | 2.097633  |
| H  | -0.332063 | 2.798257  | 2.802637  |
| H  | 0.853743  | 2.729889  | 1.517148  |
| H  | 0.715727  | 1.403950  | 2.706256  |
| C  | -0.253637 | -0.997910 | 0.829575  |
| H  | -1.089790 | -1.127130 | 1.526582  |
| H  | -0.347622 | -1.804303 | 0.099818  |
| C  | 1.047469  | 0.776121  | -0.478848 |
| H  | 1.069349  | 1.853256  | -0.694114 |
| H  | 1.167118  | 0.290918  | -1.452195 |
| C  | 1.021081  | -1.289099 | 1.628409  |
| H  | 1.015056  | -0.696079 | 2.549165  |
| H  | 0.984877  | -2.334838 | 1.964044  |
| C  | 2.289871  | 0.422075  | 0.351357  |
| H  | 2.381962  | 1.096739  | 1.205643  |
| C  | 2.321215  | -1.032224 | 0.847895  |
| Cl | 2.409988  | -2.209247 | -0.521296 |
| C  | 3.513082  | -1.309268 | 1.777435  |
| H  | 4.473633  | -1.236114 | 1.257314  |
| H  | 3.455080  | -2.316930 | 2.205993  |
| H  | 3.532302  | -0.600046 | 2.612796  |
| Br | 3.882918  | 0.904689  | -0.711965 |

SCF Energy (SMD/wB97XD/6-31+G\*\*) =  
-6264.2578012

SCF Energy (B3LYP/6-31G\*\*) =  
-6264.29321928

## 1n\_C006

## MMFF Geometry

|    |           |           |           |
|----|-----------|-----------|-----------|
| C  | -1.457625 | 0.381847  | -1.079795 |
| C  | -3.273044 | 1.234019  | 0.599762  |
| C  | -0.347756 | 0.420205  | 0.115601  |
| C  | -2.926191 | 0.269078  | -0.544131 |
| H  | -3.947736 | 0.768183  | 1.325920  |
| H  | -3.617662 | 0.447007  | -1.378901 |
| C  | -2.103887 | 1.789391  | 1.346638  |
| H  | -2.380216 | 2.521008  | 2.106152  |
| C  | -0.803638 | 1.482872  | 1.160950  |
| O  | -4.001593 | 2.349947  | 0.073507  |
| H  | -3.361265 | 2.977560  | -0.301322 |
| Br | -3.467417 | -1.557822 | -0.020730 |
| C  | -1.202707 | -0.721855 | -2.148264 |
| H  | -2.012051 | -0.728915 | -2.889410 |
| H  | -1.143667 | -1.730171 | -1.735425 |
| H  | -0.279328 | -0.553822 | -2.710369 |
| C  | -1.388460 | 1.718142  | -1.897877 |
| H  | -2.218394 | 1.785086  | -2.611609 |
| H  | -0.467724 | 1.785613  | -2.487823 |
| H  | -1.429093 | 2.608015  | -1.264627 |
| C  | 0.199230  | 2.225422  | 2.009654  |
| H  | -0.281160 | 2.938856  | 2.689718  |
| H  | 0.878528  | 2.812397  | 1.385070  |
| H  | 0.772806  | 1.545119  | 2.640480  |
| C  | -0.263260 | -0.952440 | 0.856402  |
| H  | -1.106059 | -1.061246 | 1.549140  |
| H  | -0.355371 | -1.775698 | 0.145212  |
| C  | 1.052713  | 0.764094  | -0.507160 |
| H  | 1.086576  | 1.831276  | -0.765257 |
| H  | 1.162002  | 0.238702  | -1.460545 |
| C  | 1.005609  | -1.223239 | 1.671586  |
| H  | 1.001195  | -0.592994 | 2.567583  |
| H  | 0.959634  | -2.254698 | 2.047511  |
| C  | 2.294362  | 0.426850  | 0.332129  |
| H  | 2.398226  | 1.133115  | 1.158909  |
| C  | 2.310259  | -1.007668 | 0.884910  |
| Cl | 2.391014  | -2.236663 | -0.438632 |
| C  | 3.497931  | -1.259432 | 1.826702  |
| H  | 4.459996  | -1.212793 | 1.306316  |
| H  | 3.431156  | -2.250054 | 2.292094  |
| H  | 3.521024  | -0.519947 | 2.635289  |
| Br | 3.888356  | 0.850062  | -0.754643 |

SCF Energy (SMD/wB97XD/6-31+G\*\*) =  
-6264.2600461

SCF Energy (B3LYP/6-31G\*\*) =  
-6264.29544814

| <b>1o_C001</b>       |           |           |           |
|----------------------|-----------|-----------|-----------|
| <b>MMFF Geometry</b> |           |           |           |
| C                    | -1.360390 | 0.163287  | 0.874598  |
| C                    | -2.978874 | 1.008699  | -0.963119 |
| C                    | -0.110036 | 0.988516  | 0.194424  |
| C                    | -2.378055 | -0.207818 | -0.259520 |
| H                    | -3.771966 | 1.477919  | -0.368903 |
| H                    | -1.914457 | -0.876943 | -0.993306 |
| C                    | -1.950327 | 2.036793  | -1.270177 |
| H                    | -2.287008 | 2.818447  | -1.950162 |
| C                    | -0.690629 | 2.063901  | -0.793225 |
| O                    | -3.554338 | 0.622722  | -2.211157 |
| H                    | -4.232056 | -0.047252 | -2.010121 |
| Br                   | -3.908019 | -1.317138 | 0.358411  |
| C                    | -2.056545 | 1.034094  | 1.959576  |
| H                    | -2.997487 | 0.593436  | 2.302783  |
| H                    | -2.282808 | 2.043676  | 1.603836  |
| H                    | -1.430815 | 1.126750  | 2.854165  |
| C                    | -0.927870 | -1.144351 | 1.576688  |
| H                    | -1.737411 | -1.567650 | 2.182085  |
| H                    | -0.108381 | -0.995846 | 2.275846  |
| H                    | -0.641883 | -1.914966 | 0.854390  |
| C                    | 0.199881  | 3.188053  | -1.288744 |
| H                    | -0.210954 | 3.674153  | -2.181259 |
| H                    | 1.193975  | 2.827171  | -1.565212 |
| H                    | 0.302408  | 3.962112  | -0.521494 |
| C                    | 0.777395  | 1.737244  | 1.252504  |
| H                    | 1.324453  | 2.555764  | 0.775391  |
| H                    | 0.162585  | 2.250458  | 1.997778  |
| C                    | 0.809799  | 0.059128  | -0.674107 |
| H                    | 1.309239  | 0.656461  | -1.447654 |
| H                    | 0.196350  | -0.647972 | -1.244774 |
| C                    | 1.854609  | 0.920229  | 1.968073  |
| H                    | 2.455490  | 1.607854  | 2.579983  |
| H                    | 1.392683  | 0.243531  | 2.690830  |
| C                    | 1.899577  | -0.719794 | 0.079249  |
| H                    | 1.455537  | -1.530650 | 0.659257  |
| C                    | 2.776178  | 0.139755  | 1.008940  |
| Cl                   | 3.767169  | 1.333569  | 0.077567  |
| C                    | 3.744742  | -0.709421 | 1.847416  |
| H                    | 3.204180  | -1.477455 | 2.412310  |
| H                    | 4.286784  | -0.091375 | 2.573095  |
| H                    | 4.495228  | -1.216211 | 1.232237  |
| Br                   | 2.952945  | -1.724969 | -1.256009 |

**SCF Energy (SMD/wB97XD/6-31+G\*\*) =**  
**-6264.2629238**  
**SCF Energy (B3LYP/6-31G\*\*) =**  
**-6264.30096716**

| <b>1o_C002</b>       |           |           |           |
|----------------------|-----------|-----------|-----------|
| <b>MMFF Geometry</b> |           |           |           |
| C                    | -1.448847 | 0.123999  | 0.915388  |
| C                    | -2.901450 | 1.102083  | -0.982989 |
| C                    | -0.129491 | 0.904500  | 0.336342  |
| C                    | -2.411128 | -0.166598 | -0.281360 |
| H                    | -3.723270 | 1.579826  | -0.436272 |
| H                    | -1.942876 | -0.839421 | -1.008104 |
| C                    | -1.816198 | 2.107151  | -1.162014 |
| H                    | -2.081507 | 2.938463  | -1.814027 |
| C                    | -0.590466 | 2.060183  | -0.602462 |
| O                    | -3.387464 | 0.787770  | -2.287548 |
| H                    | -4.105504 | 0.140478  | -2.169487 |
| Br                   | -4.023109 | -1.206603 | 0.224174  |
| C                    | -2.161374 | 0.998284  | 1.990060  |
| H                    | -3.103659 | 0.551850  | 2.322286  |
| H                    | -2.387270 | 2.005671  | 1.628578  |
| H                    | -1.548857 | 1.106190  | 2.891519  |
| C                    | -1.068686 | -1.211801 | 1.607772  |
| H                    | -1.924662 | -1.660284 | 2.123374  |
| H                    | -0.305174 | -1.078903 | 2.378184  |
| H                    | -0.702648 | -1.952842 | 0.890414  |
| C                    | 0.370706  | 3.172009  | -0.952511 |
| H                    | 1.300777  | 2.773367  | -1.365312 |
| H                    | 0.589960  | 3.784895  | -0.073654 |
| H                    | -0.037842 | 3.849404  | -1.711377 |
| C                    | 0.714194  | 1.457833  | 1.540713  |
| H                    | 0.279339  | 2.398508  | 1.903305  |
| H                    | 0.660443  | 0.770176  | 2.390944  |
| C                    | 0.765945  | -0.047713 | -0.531439 |
| H                    | 1.152305  | 0.475382  | -1.416052 |
| H                    | 0.165858  | -0.862019 | -0.949883 |
| C                    | 2.211476  | 1.682772  | 1.284811  |
| H                    | 2.337215  | 2.562665  | 0.648635  |
| H                    | 2.668634  | 1.980709  | 2.238273  |
| C                    | 1.952864  | -0.625635 | 0.243718  |
| H                    | 1.590236  | -1.171549 | 1.119621  |
| C                    | 2.956940  | 0.455880  | 0.698002  |
| Cl                   | 3.968905  | 1.066647  | -0.678307 |
| C                    | 3.925900  | -0.107988 | 1.751207  |
| H                    | 3.378680  | -0.476244 | 2.626558  |
| H                    | 4.626105  | 0.659630  | 2.101758  |
| H                    | 4.524615  | -0.937474 | 1.360796  |
| Br                   | 2.765826  | -2.063780 | -0.823599 |

**SCF Energy (SMD/wB97XD/6-31+G\*\*) =**  
**-6264.2599294**  
**SCF Energy (B3LYP/6-31G\*\*) =**  
**-6264.29667529**

| <b>1o_C003</b>       |          |          |          |
|----------------------|----------|----------|----------|
| <b>MMFF Geometry</b> |          |          |          |
| C                    | -1.37565 | 0.17814  | 0.87993  |
| C                    | -2.96150 | 0.97883  | -1.01401 |
| C                    | -0.11774 | 0.99382  | 0.20360  |
| C                    | -2.38011 | -0.21970 | -0.25979 |
| H                    | -3.79273 | 1.43443  | -0.46388 |
| H                    | -1.90634 | -0.91296 | -0.96382 |
| C                    | -1.94295 | 2.03022  | -1.28512 |
| H                    | -2.28416 | 2.82394  | -1.94961 |
| C                    | -0.69240 | 2.06911  | -0.78717 |
| O                    | -3.47425 | 0.56767  | -2.28250 |
| H                    | -2.72037 | 0.29231  | -2.83167 |
| Br                   | -3.91200 | -1.31513 | 0.37593  |
| C                    | -2.08822 | 1.06791  | 1.93933  |
| H                    | -3.03213 | 0.63165  | 2.27968  |
| H                    | -2.31321 | 2.06975  | 1.56186  |
| H                    | -1.47494 | 1.17934  | 2.84025  |
| C                    | -0.94680 | -1.11421 | 1.61247  |
| H                    | -1.76066 | -1.52713 | 2.21919  |
| H                    | -0.13445 | -0.94999 | 2.31591  |
| H                    | -0.65246 | -1.89853 | 0.90867  |
| C                    | 0.19117  | 3.21108  | -1.25302 |
| H                    | -0.21455 | 3.70765  | -2.14212 |
| H                    | 1.19116  | 2.86243  | -1.52483 |
| H                    | 0.27715  | 3.97356  | -0.47233 |
| C                    | 0.77167  | 1.73692  | 1.26559  |
| H                    | 1.31762  | 2.55839  | 0.79267  |
| H                    | 0.15788  | 2.24518  | 2.01487  |
| C                    | 0.79909  | 0.06231  | -0.66399 |
| H                    | 1.30186  | 0.66060  | -1.43520 |
| H                    | 0.18472  | -0.64114 | -1.23783 |
| C                    | 1.85370  | 0.92017  | 1.97543  |
| H                    | 2.45907  | 1.60894  | 2.58170  |
| H                    | 1.39756  | 0.24559  | 2.70358  |
| C                    | 1.88414  | -0.72210 | 0.09018  |
| H                    | 1.43547  | -1.52724 | 0.67468  |
| C                    | 2.76859  | 0.13626  | 1.01316  |
| Cl                   | 3.75595  | 1.32640  | 0.07321  |
| C                    | 3.74015  | -0.71334 | 1.84750  |
| H                    | 3.20138  | -1.47985 | 2.41615  |
| H                    | 4.28696  | -0.09521 | 2.56951  |
| H                    | 4.48665  | -1.22201 | 1.22903  |
| Br                   | 2.92664  | -1.73694 | -1.24609 |

**SCF Energy (SMD/wB97XD/6-31+G\*\*) =**  
**-6264.2609895**  
**SCF Energy (B3LYP/6-31G\*\*) =**  
**-6264.29627805**

| <b>1o_C004</b>       |          |          |          |
|----------------------|----------|----------|----------|
| <b>MMFF Geometry</b> |          |          |          |
| C                    | -1.36920 | 0.15450  | 0.88137  |
| C                    | -2.95724 | 0.97550  | -1.00234 |
| C                    | -0.11566 | 0.98574  | 0.21847  |
| C                    | -2.37118 | -0.22988 | -0.26488 |
| H                    | -3.79803 | 1.41263  | -0.45047 |
| H                    | -1.89951 | -0.91630 | -0.97711 |
| C                    | -1.94403 | 2.03719  | -1.25595 |
| H                    | -2.27374 | 2.83775  | -1.91590 |
| C                    | -0.69558 | 2.07684  | -0.75143 |
| O                    | -3.44532 | 0.55397  | -2.27649 |
| H                    | -3.97675 | 1.28209  | -2.63914 |
| Br                   | -3.90894 | -1.32925 | 0.36506  |
| C                    | -2.08443 | 1.02515  | 1.95503  |
| H                    | -3.02516 | 0.57950  | 2.29174  |
| H                    | -2.31554 | 2.03109  | 1.59247  |
| H                    | -1.46994 | 1.12662  | 2.85628  |
| C                    | -0.93609 | -1.14825 | 1.59273  |
| H                    | -1.74854 | -1.57372 | 2.19261  |
| H                    | -0.12426 | -0.99335 | 2.29875  |
| H                    | -0.63951 | -1.92010 | 0.87623  |
| C                    | 0.18598  | 3.22732  | -1.20001 |
| H                    | 0.27019  | 3.97780  | -0.40755 |
| H                    | -0.22022 | 3.73712  | -2.08133 |
| H                    | 1.18685  | 2.88533  | -1.47685 |
| C                    | 0.77283  | 1.71294  | 1.29214  |
| H                    | 1.31696  | 2.54318  | 0.83258  |
| H                    | 0.15862  | 2.20770  | 2.05005  |
| C                    | 0.80369  | 0.07319  | -0.66712 |
| H                    | 1.30444  | 0.68707  | -1.42724 |
| H                    | 0.19112  | -0.62134 | -1.25361 |
| C                    | 1.85662  | 0.88645  | 1.98753  |
| H                    | 2.46059  | 1.56600  | 2.60552  |
| H                    | 1.40249  | 0.19852  | 2.70425  |
| C                    | 1.89130  | -0.72165 | 0.07176  |
| H                    | 1.44511  | -1.53928 | 0.64063  |
| C                    | 2.77299  | 0.12160  | 1.01150  |
| Cl                   | 3.75992  | 1.33134  | 0.09581  |
| C                    | 3.74529  | -0.74150 | 1.83122  |
| H                    | 3.20733  | -1.51956 | 2.38477  |
| H                    | 4.28988  | -0.13585 | 2.56540  |
| H                    | 4.49370  | -1.23703 | 1.20446  |
| Br                   | 2.93969  | -1.70764 | -1.28174 |

**SCF Energy (SMD/wB97XD/6-31+G\*\*) =**  
**-6264.2598279**  
**SCF Energy (B3LYP/6-31G\*\*) =**  
**-6264.29443057**

| <b>1o_C005</b>       |           |           |           |
|----------------------|-----------|-----------|-----------|
| <b>MMFF Geometry</b> |           |           |           |
| C                    | -1.463889 | 0.126216  | 0.915014  |
| C                    | -2.883882 | 1.083491  | -1.027192 |
| C                    | -0.137747 | 0.901575  | 0.345254  |
| C                    | -2.418537 | -0.176031 | -0.287863 |
| H                    | -3.736347 | 1.551002  | -0.521148 |
| H                    | -1.947914 | -0.870249 | -0.992485 |
| C                    | -1.806547 | 2.106204  | -1.168045 |
| H                    | -2.074954 | 2.952537  | -1.800134 |
| C                    | -0.589694 | 2.061905  | -0.591044 |
| O                    | -3.313516 | 0.753853  | -2.348959 |
| H                    | -2.531380 | 0.469379  | -2.852118 |
| Br                   | -4.036969 | -1.198765 | 0.231340  |
| C                    | -2.185256 | 1.008754  | 1.976983  |
| H                    | -3.122993 | 0.558306  | 2.316389  |
| H                    | -2.421698 | 2.008220  | 1.600700  |
| H                    | -1.574398 | 1.135330  | 2.877050  |
| C                    | -1.088979 | -1.205781 | 1.619314  |
| H                    | -1.948546 | -1.651350 | 2.131320  |
| H                    | -0.331205 | -1.069909 | 2.394625  |
| H                    | -0.717442 | -1.950825 | 0.908880  |
| C                    | 0.366880  | 3.187788  | -0.907513 |
| H                    | 0.571680  | 3.786257  | -0.015437 |
| H                    | -0.037515 | 3.875896  | -1.658938 |
| H                    | 1.303944  | 2.802032  | -1.316870 |
| C                    | 0.702730  | 1.447269  | 1.555961  |
| H                    | 0.268947  | 2.387227  | 1.921671  |
| H                    | 0.642949  | 0.756857  | 2.403289  |
| C                    | 0.756844  | -0.050420 | -0.521602 |
| H                    | 1.144460  | 0.474342  | -1.404901 |
| H                    | 0.156516  | -0.863374 | -0.942089 |
| C                    | 2.202427  | 1.669063  | 1.310401  |
| H                    | 2.335712  | 2.558745  | 0.689367  |
| H                    | 2.655128  | 1.950263  | 2.271101  |
| C                    | 1.941951  | -0.631780 | 0.254198  |
| H                    | 1.578335  | -1.179515 | 1.128709  |
| C                    | 2.946866  | 0.448380  | 0.709360  |
| Cl                   | 3.944860  | 1.071016  | -0.672383 |
| C                    | 3.926314  | -0.119468 | 1.750381  |
| H                    | 3.387373  | -0.497528 | 2.626683  |
| H                    | 4.625415  | 0.648721  | 2.101890  |
| H                    | 4.526216  | -0.942754 | 1.348888  |
| Br                   | 2.753435  | -2.066112 | -0.819795 |

**SCF Energy (SMD/wB97XD/6-31+G\*\*) =**  
**-6264.2582131**  
**SCF Energy (B3LYP/6-31G\*\*) =**  
**-6264.29215564**

| <b>1o_C006</b>       |           |           |           |
|----------------------|-----------|-----------|-----------|
| <b>MMFF Geometry</b> |           |           |           |
| C                    | -1.456558 | 0.108232  | 0.914913  |
| C                    | -2.882303 | 1.072435  | -1.020139 |
| C                    | -0.135904 | 0.895023  | 0.351046  |
| C                    | -2.410149 | -0.188673 | -0.289824 |
| H                    | -3.744476 | 1.525311  | -0.515872 |
| H                    | -1.942079 | -0.880453 | -0.998657 |
| C                    | -1.811497 | 2.104259  | -1.151529 |
| H                    | -2.070105 | 2.953331  | -1.781799 |
| C                    | -0.595851 | 2.063974  | -0.570482 |
| O                    | -3.289689 | 0.722342  | -2.343127 |
| H                    | -3.749552 | 1.491223  | -2.719068 |
| Br                   | -4.032964 | -1.211644 | 0.232960  |
| C                    | -2.180552 | 0.978173  | 1.985736  |
| H                    | -3.112899 | 0.518224  | 2.327063  |
| H                    | -2.426927 | 1.977958  | 1.616733  |
| H                    | -1.566978 | 1.104009  | 2.884026  |
| C                    | -1.075006 | -1.228584 | 1.606242  |
| H                    | -1.932238 | -1.683581 | 2.113801  |
| H                    | -0.317878 | -1.096673 | 2.382856  |
| H                    | -0.700013 | -1.964725 | 0.888358  |
| C                    | 0.357205  | 3.195137  | -0.878771 |
| H                    | -0.050390 | 3.889636  | -1.622521 |
| H                    | 1.294502  | 2.816016  | -1.293825 |
| H                    | 0.562297  | 3.785717  | 0.018507  |
| C                    | 0.704938  | 1.431252  | 1.565957  |
| H                    | 0.269028  | 2.366334  | 1.941501  |
| H                    | 0.649227  | 0.732506  | 2.406660  |
| C                    | 0.761983  | -0.042683 | -0.528954 |
| H                    | 1.149137  | 0.495357  | -1.404397 |
| H                    | 0.163968  | -0.851360 | -0.960816 |
| C                    | 2.203035  | 1.660124  | 1.318903  |
| H                    | 2.331351  | 2.552688  | 0.701084  |
| H                    | 2.657042  | 1.939049  | 2.279629  |
| C                    | 1.948100  | -0.631154 | 0.239314  |
| H                    | 1.584787  | -1.190854 | 1.106290  |
| C                    | 2.950247  | 0.444858  | 0.710741  |
| Cl                   | 3.958683  | 1.081791  | -0.656814 |
| C                    | 3.922318  | -0.133951 | 1.752890  |
| H                    | 3.377307  | -0.519124 | 2.622317  |
| H                    | 4.620372  | 0.629839  | 2.115881  |
| H                    | 4.523440  | -0.954500 | 1.347610  |
| Br                   | 2.765848  | -2.050518 | -0.849553 |

**SCF Energy (SMD/wB97XD/6-31+G\*\*) =**  
**-6264.2570661**  
**SCF Energy (B3LYP/6-31G\*\*) =**  
**-6264.29030818**

| <b>1o_C007</b>       |           |           |           |
|----------------------|-----------|-----------|-----------|
| <b>MMFF Geometry</b> |           |           |           |
| C                    | -1.599832 | -0.933852 | 0.427832  |
| C                    | -2.514989 | 1.494091  | 0.405853  |
| C                    | -0.075291 | -0.337392 | 0.609054  |
| C                    | -2.438726 | 0.150129  | -0.323828 |
| H                    | -3.351588 | 1.512017  | 1.115616  |
| H                    | -2.050800 | 0.296215  | -1.338837 |
| C                    | -1.283564 | 1.828825  | 1.177766  |
| H                    | -1.340228 | 2.781462  | 1.702991  |
| C                    | -0.201753 | 1.037494  | 1.338976  |
| O                    | -2.729701 | 2.552762  | -0.524222 |
| H                    | -3.584365 | 2.377407  | -0.956144 |
| Br                   | -4.301044 | -0.411714 | -0.708306 |
| C                    | -2.212280 | -1.272831 | 1.817839  |
| H                    | -3.245591 | -1.624258 | 1.732331  |
| H                    | -2.220378 | -0.419625 | 2.501322  |
| H                    | -1.657189 | -2.079610 | 2.308453  |
| C                    | -1.637988 | -2.255890 | -0.395028 |
| H                    | -2.613957 | -2.748338 | -0.313554 |
| H                    | -0.911924 | -2.994646 | -0.052118 |
| H                    | -1.466204 | -2.087489 | -1.462327 |
| C                    | 0.828563  | 1.503916  | 2.342057  |
| H                    | 0.568775  | 2.475829  | 2.778484  |
| H                    | 1.813843  | 1.628640  | 1.901824  |
| H                    | 0.900040  | 0.805622  | 3.180894  |
| C                    | 0.792148  | -1.344012 | 1.433139  |
| H                    | 0.543241  | -1.278766 | 2.499646  |
| H                    | 0.543405  | -2.373135 | 1.165532  |
| C                    | 0.556034  | -0.100856 | -0.819034 |
| H                    | 0.151385  | 0.819867  | -1.260073 |
| H                    | 0.210364  | -0.895121 | -1.486039 |
| C                    | 2.314141  | -1.220479 | 1.286064  |
| H                    | 2.675066  | -0.325906 | 1.799651  |
| H                    | 2.773031  | -2.060784 | 1.825358  |
| C                    | 2.085016  | -0.111764 | -0.979355 |
| H                    | 2.308550  | -0.253215 | -2.045288 |
| C                    | 2.784006  | -1.221207 | -0.173196 |
| Cl                   | 4.585998  | -1.049486 | -0.190358 |
| C                    | 2.505259  | -2.591146 | -0.826681 |
| H                    | 1.436610  | -2.811251 | -0.897639 |
| H                    | 2.966703  | -3.406151 | -0.256528 |
| H                    | 2.906258  | -2.631929 | -1.846587 |
| Br                   | 2.790077  | 1.696348  | -0.694433 |

**SCF Energy (SMD/wB97XD/6-31+G\*\*) =**  
**-6264.2575983**

**SCF Energy (B3LYP/6-31G\*\*) =**  
**-6264.29353361**

| <b>1o_C008</b>       |           |           |           |
|----------------------|-----------|-----------|-----------|
| <b>MMFF Geometry</b> |           |           |           |
| C                    | -1.617950 | -0.937861 | 0.413718  |
| C                    | -2.462842 | 1.526190  | 0.353889  |
| C                    | -0.085011 | -0.367611 | 0.597392  |
| C                    | -2.442102 | 0.158776  | -0.342733 |
| H                    | -3.334069 | 1.610211  | 1.014250  |
| H                    | -2.069131 | 0.269375  | -1.367917 |
| C                    | -1.253363 | 1.811144  | 1.183089  |
| H                    | -1.313813 | 2.744793  | 1.742245  |
| C                    | -0.194543 | 0.992877  | 1.354962  |
| O                    | -2.574579 | 2.570774  | -0.612120 |
| H                    | -1.689421 | 2.725682  | -0.984534 |
| Br                   | -4.321726 | -0.375512 | -0.683376 |
| C                    | -2.237044 | -1.268818 | 1.802761  |
| H                    | -3.264966 | -1.634964 | 1.714181  |
| H                    | -2.262649 | -0.407870 | 2.475941  |
| H                    | -1.676529 | -2.063483 | 2.306473  |
| C                    | -1.675046 | -2.259185 | -0.410439 |
| H                    | -2.665009 | -2.725677 | -0.349347 |
| H                    | -0.977794 | -3.018250 | -0.052447 |
| H                    | -1.476689 | -2.096048 | -1.473774 |
| C                    | 0.811879  | 1.405309  | 2.405728  |
| H                    | 0.549811  | 2.362009  | 2.873406  |
| H                    | 1.810415  | 1.537420  | 1.996958  |
| H                    | 0.852330  | 0.674224  | 3.218059  |
| C                    | 0.779239  | -1.400833 | 1.392271  |
| H                    | 0.527976  | -1.370776 | 2.459495  |
| H                    | 0.532135  | -2.420318 | 1.089898  |
| C                    | 0.541717  | -0.115054 | -0.829070 |
| H                    | 0.129168  | 0.804794  | -1.264110 |
| H                    | 0.205135  | -0.909058 | -1.501220 |
| C                    | 2.302265  | -1.273605 | 1.252843  |
| H                    | 2.662538  | -0.395769 | 1.794528  |
| H                    | 2.759641  | -2.130075 | 1.767452  |
| C                    | 2.070817  | -0.105296 | -0.983361 |
| H                    | 2.301469  | -0.212651 | -2.051650 |
| C                    | 2.776473  | -1.229995 | -0.204530 |
| Cl                   | 4.576064  | -1.039729 | -0.212829 |
| C                    | 2.510958  | -2.584669 | -0.894616 |
| H                    | 1.444385  | -2.815232 | -0.967886 |
| H                    | 2.983364  | -3.409653 | -0.348255 |
| H                    | 2.909351  | -2.593025 | -1.916295 |
| Br                   | 2.747818  | 1.703378  | -0.636962 |

**SCF Energy (SMD/wB97XD/6-31+G\*\*) =**  
**-6264.2560663**

**SCF Energy (B3LYP/6-31G\*\*) =**  
**-6264.28941087**



## 1o\_C009

## MMFF Geometry

|    |           |           |           |
|----|-----------|-----------|-----------|
| C  | -1.615569 | -0.945135 | 0.413347  |
| C  | -2.433847 | 1.530263  | 0.294331  |
| C  | -0.082923 | -0.375855 | 0.592935  |
| C  | -2.433905 | 0.142145  | -0.361645 |
| H  | -3.321703 | 1.661441  | 0.924821  |
| H  | -2.071886 | 0.217898  | -1.394121 |
| C  | -1.240152 | 1.811902  | 1.149697  |
| H  | -1.294621 | 2.745386  | 1.707527  |
| C  | -0.194930 | 0.982549  | 1.351307  |
| O  | -2.487448 | 2.529011  | -0.723709 |
| H  | -2.458702 | 3.397078  | -0.288116 |
| Br | -4.326641 | -0.377983 | -0.665719 |
| C  | -2.239495 | -1.256283 | 1.804811  |
| H  | -3.259841 | -1.643313 | 1.716943  |
| H  | -2.286662 | -0.380889 | 2.457923  |
| H  | -1.669443 | -2.029517 | 2.330449  |
| C  | -1.674175 | -2.277181 | -0.393192 |
| H  | -2.674228 | -2.723891 | -0.354944 |
| H  | -1.004274 | -3.044567 | -0.001905 |
| H  | -1.441122 | -2.135070 | -1.452212 |
| C  | 0.795320  | 1.384127  | 2.420735  |
| H  | 0.529897  | 2.339706  | 2.888748  |
| H  | 1.801421  | 1.513024  | 2.029339  |
| H  | 0.818133  | 0.648925  | 3.229987  |
| C  | 0.784959  | -1.410481 | 1.382189  |
| H  | 0.535070  | -1.387419 | 2.449736  |
| H  | 0.541105  | -2.428807 | 1.074018  |
| C  | 0.542145  | -0.116414 | -0.833570 |
| H  | 0.126594  | 0.802856  | -1.266964 |
| H  | 0.208653  | -0.910210 | -1.507611 |
| C  | 2.307428  | -1.279930 | 1.241511  |
| H  | 2.666692  | -0.404574 | 1.787888  |
| H  | 2.767043  | -2.138621 | 1.750394  |
| C  | 2.071264  | -0.097263 | -0.985741 |
| H  | 2.304618  | -0.191842 | -2.054583 |
| C  | 2.778845  | -1.227421 | -0.216595 |
| Cl | 4.578928  | -1.036807 | -0.226483 |
| C  | 2.512961  | -2.577785 | -0.914962 |
| H  | 1.446575  | -2.810212 | -0.985768 |
| H  | 2.988855  | -3.405609 | -0.375953 |
| H  | 2.907646  | -2.578336 | -1.938103 |
| Br | 2.744653  | 1.708176  | -0.613097 |

SCF Energy (SMD/wB97XD/6-31+G\*\*) =  
-6264.2547966

SCF Energy (B3LYP/6-31G\*\*) =  
-6264.28831877

## 1o\_C010

## MMFF Geometry

|    |           |           |           |
|----|-----------|-----------|-----------|
| C  | -1.279809 | 0.356616  | -0.972081 |
| C  | -3.302582 | 1.354114  | 0.349643  |
| C  | -0.376557 | 0.256534  | 0.392101  |
| C  | -2.830683 | 0.343175  | -0.694842 |
| H  | -4.282360 | 1.069759  | 0.750650  |
| H  | -3.358102 | 0.546284  | -1.636887 |
| C  | -2.351790 | 1.512204  | 1.484037  |
| H  | -2.757843 | 2.056089  | 2.335759  |
| C  | -1.092063 | 1.039712  | 1.550570  |
| O  | -3.488422 | 2.632206  | -0.259435 |
| H  | -3.646409 | 3.277069  | 0.450396  |
| Br | -3.570003 | -1.423558 | -0.211754 |
| C  | -0.988733 | -0.718494 | -2.048470 |
| H  | -1.628840 | -0.565929 | -2.927311 |
| H  | -1.185937 | -1.734379 | -1.702132 |
| H  | 0.036650  | -0.681055 | -2.416832 |
| C  | -0.993004 | 1.711129  | -1.700232 |
| H  | -1.710748 | 1.886866  | -2.510797 |
| H  | -0.001342 | 1.717101  | -2.166166 |
| H  | -1.047960 | 2.568695  | -1.023133 |
| C  | -0.338667 | 1.317835  | 2.841113  |
| H  | -1.015945 | 1.585371  | 3.660681  |
| H  | 0.349355  | 2.158972  | 2.708245  |
| H  | 0.228565  | 0.450985  | 3.186737  |
| C  | -0.154274 | -1.215680 | 0.882884  |
| H  | 0.105317  | -1.219913 | 1.947157  |
| H  | -1.081248 | -1.787610 | 0.842609  |
| C  | 1.050081  | 0.904750  | 0.227206  |
| H  | 1.495711  | 1.074117  | 1.213810  |
| H  | 0.974619  | 1.916665  | -0.185807 |
| C  | 0.940502  | -2.034025 | 0.177386  |
| H  | 1.063282  | -2.980150 | 0.723293  |
| H  | 0.602741  | -2.336711 | -0.816246 |
| C  | 2.069809  | 0.076992  | -0.556416 |
| H  | 1.770801  | -0.004013 | -1.602466 |
| C  | 2.300846  | -1.322221 | 0.049544  |
| Cl | 3.033397  | -1.233381 | 1.703865  |
| C  | 3.228678  | -2.186591 | -0.818585 |
| H  | 2.855730  | -2.250105 | -1.847212 |
| H  | 3.293894  | -3.210208 | -0.430853 |
| H  | 4.249023  | -1.791913 | -0.859339 |
| Br | 3.734007  | 1.131774  | -0.690176 |

SCF Energy (SMD/wB97XD/6-31+G\*\*) =  
-6264.2544729

SCF Energy (B3LYP/6-31G\*\*) =  
-6264.29144462

| <b>1o_C011</b>       |           |           |           |
|----------------------|-----------|-----------|-----------|
| <b>MMFF Geometry</b> |           |           |           |
| C                    | 1.283906  | -0.368735 | -0.955758 |
| C                    | 3.313751  | -1.327264 | 0.392671  |
| C                    | 0.366569  | -0.283172 | 0.399184  |
| C                    | 2.831400  | -0.334825 | -0.665485 |
| H                    | 4.262893  | -1.006131 | 0.838169  |
| H                    | 3.366296  | -0.542733 | -1.602294 |
| C                    | 2.337401  | -1.537570 | 1.491943  |
| H                    | 2.732782  | -2.122420 | 2.321569  |
| C                    | 1.069094  | -1.088040 | 1.547577  |
| O                    | 3.563771  | -2.607970 | -0.186206 |
| H                    | 4.370879  | -2.529527 | -0.722315 |
| Br                   | 3.555080  | 1.444228  | -0.210136 |
| C                    | 0.986620  | 0.700314  | -2.036031 |
| H                    | 1.637509  | 0.556201  | -2.908420 |
| H                    | 1.165424  | 1.719272  | -1.689596 |
| H                    | -0.033692 | 0.647491  | -2.415214 |
| C                    | 1.025135  | -1.729470 | -1.683871 |
| H                    | 1.752904  | -1.895622 | -2.487514 |
| H                    | 0.038187  | -1.751376 | -2.159315 |
| H                    | 1.088329  | -2.584848 | -1.004632 |
| C                    | 0.295220  | -1.420987 | 2.811770  |
| H                    | 0.959617  | -1.709344 | 3.634801  |
| H                    | -0.380570 | -2.264220 | 2.636328  |
| H                    | -0.287418 | -0.571050 | 3.174565  |
| C                    | 0.150006  | 1.178747  | 0.917829  |
| H                    | -0.121075 | 1.160491  | 1.979609  |
| H                    | 1.081654  | 1.744128  | 0.900339  |
| C                    | -1.062990 | -0.919264 | 0.208073  |
| H                    | -1.517631 | -1.107889 | 1.186962  |
| H                    | -0.990179 | -1.921880 | -0.227283 |
| C                    | -0.931341 | 2.018276  | 0.217435  |
| H                    | -1.049944 | 2.956563  | 0.777539  |
| H                    | -0.583352 | 2.332881  | -0.768865 |
| C                    | -2.074152 | -0.069034 | -0.562346 |
| H                    | -1.772287 | 0.028893  | -1.605765 |
| C                    | -2.296988 | 1.320569  | 0.068258  |
| Cl                   | -3.041195 | 1.207938  | 1.715602  |
| C                    | -3.211787 | 2.208658  | -0.789807 |
| H                    | -2.831254 | 2.288328  | -1.814527 |
| H                    | -3.271393 | 3.225364  | -0.383437 |
| H                    | -4.234971 | 1.823161  | -0.844862 |
| Br                   | -3.746041 | -1.108117 | -0.723009 |

**SCF Energy (SMD/wB97XD/6-31+G\*\*) =**  
**-6264.2565078**  
**SCF Energy (B3LYP/6-31G\*\*) =**  
**-6264.29305907**

| <b>1o_C012</b>       |           |           |           |
|----------------------|-----------|-----------|-----------|
| <b>MMFF Geometry</b> |           |           |           |
| C                    | 1.434414  | -0.133222 | 1.128453  |
| C                    | 3.341586  | 1.174513  | -0.108893 |
| C                    | 0.374758  | 0.570190  | 0.123395  |
| C                    | 2.888001  | -0.146590 | 0.543002  |
| H                    | 3.849510  | 1.013687  | -1.066621 |
| H                    | 3.585601  | -0.402975 | 1.351907  |
| C                    | 2.263486  | 2.184912  | -0.338213 |
| H                    | 2.628653  | 3.177814  | -0.597910 |
| C                    | 0.935744  | 1.974774  | -0.225649 |
| O                    | 4.298846  | 1.811799  | 0.744462  |
| H                    | 5.115374  | 1.285044  | 0.700544  |
| Br                   | 3.268055  | -1.633554 | -0.700290 |
| C                    | 0.998599  | -1.552772 | 1.575895  |
| H                    | 1.771231  | -2.016005 | 2.201718  |
| H                    | 0.807745  | -2.232163 | 0.742822  |
| H                    | 0.085510  | -1.522919 | 2.179892  |
| C                    | 1.543586  | 0.675522  | 2.472650  |
| H                    | 2.334286  | 0.259735  | 3.109943  |
| H                    | 0.627520  | 0.630993  | 3.068001  |
| H                    | 1.781939  | 1.731534  | 2.320250  |
| C                    | 0.014497  | 3.149244  | -0.451454 |
| H                    | 0.545019  | 4.015350  | -0.863444 |
| H                    | -0.430746 | 3.471439  | 0.495337  |
| H                    | -0.782848 | 2.910482  | -1.157280 |
| C                    | 0.264549  | -0.212717 | -1.234767 |
| H                    | 1.115708  | 0.017563  | -1.886853 |
| H                    | 0.294624  | -1.293203 | -1.067289 |
| C                    | -1.058266 | 0.631309  | 0.776247  |
| H                    | -1.545663 | 1.595992  | 0.612321  |
| H                    | -0.998580 | 0.554146  | 1.863886  |
| C                    | -1.010444 | 0.071807  | -2.035790 |
| H                    | -0.996341 | 1.122121  | -2.343705 |
| H                    | -0.960637 | -0.493201 | -2.975926 |
| C                    | -1.999555 | -0.454923 | 0.243667  |
| H                    | -1.553534 | -1.439749 | 0.420363  |
| C                    | -2.305696 | -0.285018 | -1.263104 |
| Cl                   | -3.487003 | 1.051612  | -1.582628 |
| C                    | -2.913644 | -1.574375 | -1.839502 |
| H                    | -2.230950 | -2.421359 | -1.706210 |
| H                    | -3.110189 | -1.478582 | -2.913957 |
| H                    | -3.862465 | -1.833680 | -1.358284 |
| Br                   | -3.605546 | -0.522439 | 1.375258  |

**SCF Energy (SMD/wB97XD/6-31+G\*\*) =**  
**-6264.2501776**  
**SCF Energy (B3LYP/6-31G\*\*) =**  
**-6264.28565808**

## 1o\_C013

## MMFF Geometry

|    |           |           |           |
|----|-----------|-----------|-----------|
| C  | 1.433213  | -0.015439 | 1.136043  |
| C  | 3.383376  | 1.148345  | -0.155493 |
| C  | 0.390111  | 0.550864  | 0.027263  |
| C  | 2.896181  | -0.110911 | 0.583427  |
| H  | 4.015866  | 0.893485  | -1.013020 |
| H  | 3.573481  | -0.312227 | 1.424746  |
| C  | 2.306941  | 2.081473  | -0.619310 |
| H  | 2.667252  | 3.017668  | -1.042471 |
| C  | 0.975756  | 1.877689  | -0.533087 |
| O  | 4.216530  | 1.891986  | 0.742619  |
| H  | 4.580549  | 2.645113  | 0.247776  |
| Br | 3.262741  | -1.699771 | -0.528401 |
| C  | 0.992419  | -1.364926 | 1.760097  |
| H  | 1.750772  | -1.731646 | 2.462780  |
| H  | 0.829471  | -2.154532 | 1.024216  |
| H  | 0.063705  | -1.260425 | 2.330882  |
| C  | 1.519437  | 0.963616  | 2.363696  |
| H  | 2.341405  | 0.676841  | 3.031557  |
| H  | 0.617046  | 0.944093  | 2.981700  |
| H  | 1.690872  | 2.003135  | 2.071905  |
| C  | 0.065505  | 2.988130  | -1.004027 |
| H  | 0.610915  | 3.760033  | -1.559097 |
| H  | -0.402237 | 3.484685  | -0.147764 |
| H  | -0.715535 | 2.623177  | -1.671751 |
| C  | 0.260826  | -0.425855 | -1.197521 |
| H  | 1.104870  | -0.296220 | -1.885529 |
| H  | 0.291003  | -1.468715 | -0.870046 |
| C  | -1.040816 | 0.741065  | 0.658527  |
| H  | -1.513006 | 1.672192  | 0.333972  |
| H  | -0.981575 | 0.848270  | 1.743362  |
| C  | -1.019782 | -0.271719 | -2.025533 |
| H  | -0.999193 | 0.706396  | -2.515306 |
| H  | -0.981046 | -0.992575 | -2.853067 |
| C  | -1.998500 | -0.405000 | 0.313966  |
| H  | -1.564242 | -1.354820 | 0.643770  |
| C  | -2.313855 | -0.476114 | -1.198215 |
| Cl | -3.475664 | 0.812764  | -1.722905 |
| C  | -2.948404 | -1.830306 | -1.555734 |
| H  | -2.279393 | -2.656904 | -1.290411 |
| H  | -3.151339 | -1.905723 | -2.630632 |
| H  | -3.897956 | -1.991227 | -1.034680 |
| Br | -3.597372 | -0.266184 | 1.449572  |

SCF Energy (SMD/wB97XD/6-31+G\*\*) =  
-6264.2482882

SCF Energy (B3LYP/6-31G\*\*) =  
-6264.28394480

## 1o\_C014

## MMFF Geometry

|    |           |           |           |
|----|-----------|-----------|-----------|
| C  | 1.440973  | -0.045009 | 1.129115  |
| C  | 3.369549  | 1.161301  | -0.168694 |
| C  | 0.387717  | 0.559174  | 0.051570  |
| C  | 2.901766  | -0.112361 | 0.561380  |
| H  | 3.947421  | 0.921636  | -1.067499 |
| H  | 3.590463  | -0.317858 | 1.392098  |
| C  | 2.287961  | 2.120501  | -0.557533 |
| H  | 2.653865  | 3.069287  | -0.949887 |
| C  | 0.959186  | 1.915605  | -0.449172 |
| O  | 4.272194  | 1.879118  | 0.682454  |
| H  | 3.742039  | 2.377190  | 1.327521  |
| Br | 3.270926  | -1.683771 | -0.576319 |
| C  | 1.007764  | -1.419271 | 1.703848  |
| H  | 1.772733  | -1.811459 | 2.385250  |
| H  | 0.838254  | -2.179256 | 0.938775  |
| H  | 0.083395  | -1.340031 | 2.285763  |
| C  | 1.527057  | 0.885749  | 2.393404  |
| H  | 2.363218  | 0.589070  | 3.038694  |
| H  | 0.633045  | 0.824615  | 3.021176  |
| H  | 1.671805  | 1.939332  | 2.141694  |
| C  | 0.040093  | 3.045595  | -0.850179 |
| H  | 0.576959  | 3.848526  | -1.368309 |
| H  | -0.420306 | 3.493410  | 0.036392  |
| H  | -0.746455 | 2.712595  | -1.528396 |
| C  | 0.265405  | -0.363785 | -1.214640 |
| H  | 1.111414  | -0.203447 | -1.893769 |
| H  | 0.297522  | -1.419880 | -0.932548 |
| C  | -1.042327 | 0.705956  | 0.695629  |
| H  | -1.521566 | 1.650030  | 0.423100  |
| H  | -0.980076 | 0.755123  | 1.784686  |
| C  | -1.014363 | -0.174412 | -2.036595 |
| H  | -0.996568 | 0.826765  | -2.477849 |
| H  | -0.972092 | -0.854386 | -2.897815 |
| C  | -1.993592 | -0.426771 | 0.293090  |
| H  | -1.553707 | -1.389383 | 0.575340  |
| C  | -2.308481 | -0.423246 | -1.221025 |
| Cl | -3.473515 | 0.887429  | -1.679653 |
| C  | -2.939390 | -1.759391 | -1.646182 |
| H  | -2.268435 | -2.596528 | -1.422012 |
| H  | -3.141489 | -1.781442 | -2.723653 |
| H  | -3.888854 | -1.948567 | -1.134554 |
| Br | -3.592534 | -0.353440 | 1.434496  |

SCF Energy (SMD/wB97XD/6-31+G\*\*) =  
-6264.2503364

SCF Energy (B3LYP/6-31G\*\*) =  
-6264.28607247

## 1p\_C001

## MMFF Geometry

|    |           |           |           |
|----|-----------|-----------|-----------|
| C  | 1.496886  | 0.843259  | 0.508628  |
| C  | 2.461037  | -1.555808 | 0.309294  |
| C  | -0.013476 | 0.205521  | 0.661509  |
| C  | 2.348270  | -0.167167 | -0.325626 |
| H  | 3.300517  | -1.601560 | 1.014350  |
| H  | 1.951179  | -0.251970 | -1.344069 |
| C  | 1.240492  | -1.974259 | 1.057481  |
| H  | 1.318781  | -2.963285 | 1.506998  |
| C  | 0.142946  | -1.220575 | 1.280345  |
| O  | 2.698865  | -2.543014 | -0.691621 |
| H  | 3.537142  | -2.304471 | -1.125584 |
| Br | 4.194262  | 0.459396  | -0.689012 |
| C  | 2.117730  | 1.094663  | 1.913371  |
| H  | 3.145585  | 1.464976  | 1.843837  |
| H  | 2.142621  | 0.196554  | 2.536305  |
| H  | 1.557017  | 1.858344  | 2.463019  |
| C  | 1.499008  | 2.220255  | -0.220502 |
| H  | 2.457468  | 2.736938  | -0.093271 |
| H  | 0.743004  | 2.908772  | 0.160242  |
| H  | 1.344329  | 2.119634  | -1.299164 |
| C  | -0.878546 | -1.786525 | 2.239342  |
| H  | -0.957476 | -1.165388 | 3.136206  |
| H  | -0.606084 | -2.789924 | 2.587839  |
| H  | -1.862790 | -1.883646 | 1.789798  |
| C  | -0.884010 | 1.128227  | 1.574195  |
| H  | -0.624413 | 0.975258  | 2.629299  |
| H  | -0.645152 | 2.178723  | 1.395337  |
| C  | -0.657129 | 0.068428  | -0.771872 |
| H  | -0.248327 | -0.813080 | -1.283665 |
| H  | -0.324614 | 0.912545  | -1.381975 |
| C  | -2.406201 | 1.000527  | 1.432161  |
| H  | -2.752638 | 0.067968  | 1.884902  |
| H  | -2.870614 | 1.792794  | 2.035726  |
| C  | -2.185926 | 0.076832  | -0.917402 |
| H  | -2.420055 | 0.304867  | -1.966245 |
| C  | -2.906135 | 1.089946  | -0.014603 |
| Cl | -2.516355 | 2.758495  | -0.647230 |
| C  | -4.437907 | 0.985840  | -0.055101 |
| H  | -4.907374 | 1.819982  | 0.480499  |
| H  | -4.800028 | 0.070054  | 0.423253  |
| H  | -4.811867 | 1.000821  | -1.085210 |
| Br | -2.882872 | -1.751973 | -0.790984 |

SCF Energy (SMD/wB97XD/6-31+G\*\*) =  
-6264.2596815

SCF Energy (B3LYP/6-31G\*\*) =  
-6264.29938274

## 1p\_C002

## MMFF Geometry

|    |          |          |          |
|----|----------|----------|----------|
| C  | -1.36559 | 0.18875  | 0.87790  |
| C  | -3.02216 | 0.96946  | -0.94409 |
| C  | -0.14473 | 1.00028  | 0.14737  |
| C  | -2.40454 | -0.22472 | -0.21375 |
| H  | -3.82894 | 1.43148  | -0.36247 |
| H  | -1.95959 | -0.91758 | -0.93623 |
| C  | -2.01878 | 2.02347  | -1.26260 |
| H  | -2.38912 | 2.80218  | -1.92825 |
| C  | -0.75148 | 2.07878  | -0.80580 |
| O  | -3.58288 | 0.55030  | -2.18787 |
| H  | -4.25406 | -0.12357 | -1.97761 |
| Br | -3.91004 | -1.31255 | 0.48435  |
| C  | -2.03518 | 1.09073  | 1.95756  |
| H  | -2.91837 | 0.61654  | 2.39667  |
| H  | -2.34985 | 2.05954  | 1.55903  |
| H  | -1.35614 | 1.28882  | 2.79364  |
| C  | -0.86147 | -1.08139 | 1.61003  |
| H  | -1.64615 | -1.53550 | 2.22474  |
| H  | -0.04316 | -0.86606 | 2.30162  |
| H  | -0.52429 | -1.84762 | 0.90484  |
| C  | 0.10042  | 3.23123  | -1.28542 |
| H  | -0.43267 | 3.87362  | -1.99602 |
| H  | 0.99154  | 2.87082  | -1.80637 |
| H  | 0.39542  | 3.87287  | -0.45040 |
| C  | 0.77192  | 1.66052  | 1.24002  |
| H  | 0.34126  | 2.61630  | 1.56502  |
| H  | 0.81404  | 1.03987  | 2.14046  |
| C  | 0.73527  | 0.06111  | -0.75402 |
| H  | 1.08195  | 0.59360  | -1.64982 |
| H  | 0.13118  | -0.76299 | -1.14716 |
| C  | 2.22532  | 1.89418  | 0.81144  |
| H  | 2.24720  | 2.61335  | -0.01075 |
| H  | 2.75645  | 2.40100  | 1.62817  |
| C  | 1.96915  | -0.49339 | -0.03377 |
| H  | 1.64557  | -1.05800 | 0.84379  |
| C  | 2.97178  | 0.60456  | 0.38845  |
| Cl | 3.88972  | -0.00669 | 1.83081  |
| C  | 4.01372  | 0.99484  | -0.67356 |
| H  | 4.72096  | 0.18751  | -0.88965 |
| H  | 4.61242  | 1.85131  | -0.33944 |
| H  | 3.52964  | 1.28262  | -1.61348 |
| Br | 2.76348  | -1.90372 | -1.14806 |

SCF Energy (SMD/wB97XD/6-31+G\*\*) =  
-6264.2620850

SCF Energy (B3LYP/6-31G\*\*) =  
-6264.29854987

**1p\_C003****MMFF Geometry**

|    |           |           |           |
|----|-----------|-----------|-----------|
| C  | 1.516125  | 0.849161  | 0.500415  |
| C  | 2.410761  | -1.583263 | 0.249503  |
| C  | -0.003651 | 0.236552  | 0.654783  |
| C  | 2.353015  | -0.169580 | -0.344624 |
| H  | 3.285333  | -1.693276 | 0.901598  |
| H  | 1.969611  | -0.212702 | -1.371002 |
| C  | 1.210663  | -1.959904 | 1.055272  |
| H  | 1.292230  | -2.935238 | 1.534721  |
| C  | 0.135987  | -1.180594 | 1.295695  |
| O  | 2.545182  | -2.553368 | -0.788752 |
| H  | 1.674562  | -2.656199 | -1.209927 |
| Br | 4.217259  | 0.427885  | -0.664443 |
| C  | 2.143550  | 1.085381  | 1.904873  |
| H  | 3.166052  | 1.470228  | 1.835428  |
| H  | 2.185240  | 0.177522  | 2.512478  |
| H  | 1.577908  | 1.833598  | 2.470247  |
| C  | 1.538337  | 2.229692  | -0.222860 |
| H  | 2.514043  | 2.718463  | -0.119851 |
| H  | 0.815562  | 2.939288  | 0.182678  |
| H  | 1.351106  | 2.139499  | -1.297059 |
| C  | -0.860668 | -1.700337 | 2.306574  |
| H  | -0.584454 | -2.691824 | 2.685095  |
| H  | -1.858380 | -1.808191 | 1.888690  |
| H  | -0.908835 | -1.045968 | 3.181528  |
| C  | -0.872519 | 1.184517  | 1.543618  |
| H  | -0.609244 | 1.064972  | 2.601805  |
| H  | -0.638446 | 2.229287  | 1.330417  |
| C  | -0.643158 | 0.090208  | -0.778596 |
| H  | -0.223601 | -0.785952 | -1.290440 |
| H  | -0.323467 | 0.939931  | -1.388054 |
| C  | -2.395626 | 1.049469  | 1.410753  |
| H  | -2.738839 | 0.129915  | 1.891068  |
| H  | -2.859712 | 1.857263  | 1.993698  |
| C  | -2.172297 | 0.072320  | -0.918249 |
| H  | -2.414866 | 0.270203  | -1.971186 |
| C  | -2.902008 | 1.096893  | -0.035929 |
| Cl | -2.534921 | 2.754435  | -0.708990 |
| C  | -4.432186 | 0.971633  | -0.068789 |
| H  | -4.911017 | 1.810945  | 0.450145  |
| H  | -4.780325 | 0.061550  | 0.430364  |
| H  | -4.809558 | 0.959005  | -1.097682 |
| Br | -2.834306 | -1.765132 | -0.738315 |

**SCF Energy (SMD/wB97XD/6-31+G\*\*) =**  
**-6264.2581472**

**SCF Energy (B3LYP/6-31G\*\*) =**  
**-6264.29493005**

**1p\_C004****MMFF Geometry**

|    |           |           |           |
|----|-----------|-----------|-----------|
| C  | 1.512997  | 0.858083  | 0.500398  |
| C  | 2.384624  | -1.580763 | 0.196308  |
| C  | -0.006354 | 0.246301  | 0.651228  |
| C  | 2.344014  | -0.151215 | -0.360894 |
| H  | 3.275932  | -1.729100 | 0.818183  |
| H  | 1.969818  | -0.163023 | -1.391687 |
| C  | 1.198899  | -1.956060 | 1.026283  |
| H  | 1.274029  | -2.930798 | 1.505336  |
| C  | 0.136066  | -1.168818 | 1.293828  |
| O  | 2.466383  | -2.505694 | -0.887633 |
| H  | 2.502618  | -3.399883 | -0.509579 |
| Br | 4.221184  | 0.432355  | -0.648812 |
| C  | 2.145045  | 1.076547  | 1.905653  |
| H  | 3.160549  | 1.479924  | 1.838228  |
| H  | 2.206090  | 0.157432  | 2.494409  |
| H  | 1.571213  | 1.804171  | 2.489178  |
| C  | 1.536872  | 2.247129  | -0.206249 |
| H  | 2.522724  | 2.719189  | -0.125259 |
| H  | 0.839281  | 2.963450  | 0.230514  |
| H  | 1.317514  | 2.174921  | -1.275448 |
| C  | -0.846263 | -1.679941 | 2.322326  |
| H  | -0.881120 | -1.019653 | 3.193406  |
| H  | -0.565339 | -2.668895 | 2.703937  |
| H  | -1.850038 | -1.789749 | 1.919223  |
| C  | -0.879544 | 1.195723  | 1.534367  |
| H  | -0.616708 | 1.084313  | 2.593389  |
| H  | -0.650497 | 2.239929  | 1.314077  |
| C  | -0.643896 | 0.094359  | -0.782785 |
| H  | -0.219780 | -0.779828 | -1.294214 |
| H  | -0.328952 | 0.945719  | -1.392545 |
| C  | -2.402043 | 1.054721  | 1.401199  |
| H  | -2.742348 | 0.136702  | 1.886437  |
| H  | -2.869442 | 1.864138  | 1.979232  |
| C  | -2.172726 | 0.064897  | -0.921448 |
| H  | -2.417932 | 0.251690  | -1.975728 |
| C  | -2.907029 | 1.092657  | -0.046400 |
| Cl | -2.546620 | 2.748557  | -0.727617 |
| C  | -4.436866 | 0.961645  | -0.079907 |
| H  | -4.919228 | 1.802582  | 0.433113  |
| H  | -4.782542 | 0.053724  | 0.424830  |
| H  | -4.813085 | 0.941030  | -1.109094 |
| Br | -2.827015 | -1.773768 | -0.719269 |

**SCF Energy (SMD/wB97XD/6-31+G\*\*) =**  
**-6264.2568859**

**SCF Energy (B3LYP/6-31G\*\*) =**  
**-6264.29375116**

## 1p\_C005

## MMFF Geometry

|    |           |           |           |
|----|-----------|-----------|-----------|
| C  | -1.332205 | 0.044094  | 0.874327  |
| C  | -3.097550 | 1.029106  | -0.746810 |
| C  | -0.175018 | 1.044634  | 0.267444  |
| C  | -2.385582 | -0.230352 | -0.254973 |
| H  | -3.886206 | 1.352495  | -0.057094 |
| H  | -1.921628 | -0.754616 | -1.098290 |
| C  | -2.153609 | 2.159797  | -0.945200 |
| H  | -2.577046 | 3.004996  | -1.486695 |
| C  | -0.874105 | 2.207102  | -0.526426 |
| O  | -3.711746 | 0.786616  | -2.012381 |
| H  | -4.333887 | 0.048310  | -1.882942 |
| Br | -3.810242 | -1.517372 | 0.261809  |
| C  | -2.018896 | 0.699443  | 2.106302  |
| H  | -1.348379 | 0.711405  | 2.972716  |
| H  | -2.906733 | 0.146509  | 2.427834  |
| H  | -2.331978 | 1.729546  | 1.911709  |
| C  | -0.784173 | -1.319893 | 1.353877  |
| H  | -1.533340 | -1.881110 | 1.923816  |
| H  | 0.060345  | -1.221984 | 2.031305  |
| H  | -0.490931 | -1.955435 | 0.512733  |
| C  | -0.089043 | 3.453359  | -0.888754 |
| H  | 0.017991  | 4.106582  | -0.016918 |
| H  | -0.586803 | 4.041006  | -1.668892 |
| H  | 0.903626  | 3.208746  | -1.275153 |
| C  | 0.720249  | 1.698758  | 1.380315  |
| H  | 1.206133  | 2.600104  | 0.994247  |
| H  | 0.114191  | 2.073704  | 2.210520  |
| C  | 0.756663  | 0.314636  | -0.763547 |
| H  | 1.179765  | 1.050806  | -1.458983 |
| H  | 0.160855  | -0.343289 | -1.407189 |
| C  | 1.868838  | 0.856362  | 1.933840  |
| H  | 2.453245  | 1.484841  | 2.620488  |
| H  | 1.474073  | 0.054942  | 2.562294  |
| C  | 1.930019  | -0.487583 | -0.176199 |
| H  | 1.566750  | -1.405492 | 0.289357  |
| C  | 2.789890  | 0.298711  | 0.830508  |
| Cl | 3.959009  | -0.818178 | 1.648991  |
| C  | 3.614626  | 1.436062  | 0.202796  |
| H  | 4.110622  | 2.034962  | 0.976067  |
| H  | 2.994814  | 2.118112  | -0.386089 |
| H  | 4.403283  | 1.060887  | -0.457844 |
| Br | 2.982854  | -1.193352 | -1.691975 |

SCF Energy (SMD/wB97XD/6-31+G\*\*) =  
-6264.2624456

SCF Energy (B3LYP/6-31G\*\*) =  
-6264.29872807

## 1p\_C006

## MMFF Geometry

|    |           |           |           |
|----|-----------|-----------|-----------|
| C  | -1.376915 | 0.190218  | 0.877949  |
| C  | -3.013514 | 0.946638  | -0.980793 |
| C  | -0.153150 | 1.001742  | 0.152643  |
| C  | -2.410960 | -0.236921 | -0.216289 |
| H  | -3.849758 | 1.392749  | -0.430227 |
| H  | -1.960566 | -0.946669 | -0.918640 |
| C  | -2.019417 | 2.021460  | -1.267183 |
| H  | -2.396779 | 2.814278  | -1.912912 |
| C  | -0.757891 | 2.083435  | -0.797468 |
| O  | -3.527600 | 0.516656  | -2.242147 |
| H  | -2.775719 | 0.224152  | -2.784763 |
| Br | -3.916179 | -1.313257 | 0.499099  |
| C  | -2.055616 | 1.096782  | 1.948237  |
| H  | -2.931077 | 0.616987  | 2.396497  |
| H  | -2.384858 | 2.055896  | 1.538310  |
| H  | -1.377365 | 1.314105  | 2.780079  |
| C  | -0.871757 | -1.074578 | 1.619953  |
| H  | -1.656677 | -1.526854 | 2.235619  |
| H  | -0.055525 | -0.854869 | 2.312377  |
| H  | -0.531409 | -1.844045 | 0.919757  |
| C  | 0.086205  | 3.253456  | -1.248251 |
| H  | -0.449006 | 3.905222  | -1.948663 |
| H  | 0.982142  | 2.909756  | -1.772397 |
| H  | 0.372507  | 3.881163  | -0.399865 |
| C  | 0.762464  | 1.657297  | 1.249765  |
| H  | 0.333252  | 2.612953  | 1.576864  |
| H  | 0.801460  | 1.035333  | 2.149200  |
| C  | 0.728217  | 0.067677  | -0.751219 |
| H  | 1.079799  | 0.607466  | -1.641013 |
| H  | 0.123772  | -0.751756 | -1.153380 |
| C  | 2.217315  | 1.888517  | 0.824901  |
| H  | 2.242249  | 2.607425  | 0.002512  |
| H  | 2.747659  | 2.394099  | 1.642899  |
| C  | 1.958537  | -0.495072 | -0.030701 |
| H  | 1.630775  | -1.066697 | 0.840709  |
| C  | 2.962283  | 0.597497  | 0.403557  |
| Cl | 3.866122  | -0.022743 | 1.850327  |
| C  | 4.014221  | 0.988264  | -0.648396 |
| H  | 4.613065  | 1.841410  | -0.306106 |
| H  | 3.538792  | 1.281381  | -1.591100 |
| H  | 4.720491  | 0.179327  | -0.861702 |
| Br | 2.752161  | -1.896683 | -1.156603 |

SCF Energy (SMD/wB97XD/6-31+G\*\*) =  
-6264.2602386

SCF Energy (B3LYP/6-31G\*\*) =  
-6264.29365075

## 1p\_C007

## MMFF Geometry

|    |           |           |           |
|----|-----------|-----------|-----------|
| C  | -1.370522 | 0.170863  | 0.879962  |
| C  | -3.007625 | 0.937935  | -0.974515 |
| C  | -0.151008 | 0.995457  | 0.164895  |
| C  | -2.400807 | -0.248772 | -0.220369 |
| H  | -3.856330 | 1.365353  | -0.426843 |
| H  | -1.951825 | -0.955088 | -0.927179 |
| C  | -2.020422 | 2.023977  | -1.244485 |
| H  | -2.387363 | 2.821389  | -1.888389 |
| C  | -0.761098 | 2.089030  | -0.767915 |
| O  | -3.489067 | 0.491440  | -2.242428 |
| H  | -4.074479 | 1.184603  | -2.590281 |
| Br | -3.912221 | -1.326722 | 0.492708  |
| C  | -2.053040 | 1.062711  | 1.960328  |
| H  | -2.922705 | 0.572185  | 2.408137  |
| H  | -2.391835 | 2.022423  | 1.559700  |
| H  | -1.373776 | 1.278508  | 2.791714  |
| C  | -0.861071 | -1.100739 | 1.607303  |
| H  | -1.644833 | -1.563650 | 2.216478  |
| H  | -0.046374 | -0.886393 | 2.303181  |
| H  | -0.517111 | -1.860430 | 0.898247  |
| C  | 0.080394  | 3.265956  | -1.205082 |
| H  | -0.456392 | 3.925652  | -1.896787 |
| H  | 0.976646  | 2.930720  | -1.734111 |
| H  | 0.365920  | 3.883760  | -0.349183 |
| C  | 0.764374  | 1.638931  | 1.269462  |
| H  | 0.332877  | 2.588809  | 1.610140  |
| H  | 0.806746  | 1.005135  | 2.160419  |
| C  | 0.731995  | 0.076110  | -0.753212 |
| H  | 1.080685  | 0.628937  | -1.636056 |
| H  | 0.129790  | -0.739819 | -1.165575 |
| C  | 2.217769  | 1.880442  | 0.845552  |
| H  | 2.239452  | 2.611238  | 0.033653  |
| H  | 2.747916  | 2.375864  | 1.669875  |
| C  | 1.964531  | -0.492395 | -0.041496 |
| H  | 1.639466  | -1.074825 | 0.823758  |
| C  | 2.965666  | 0.597745  | 0.404580  |
| Cl | 3.876409  | -0.037924 | 1.840824  |
| C  | 4.013168  | 1.006271  | -0.645138 |
| H  | 4.609851  | 1.857055  | -0.293320 |
| H  | 3.533972  | 1.310006  | -1.582553 |
| H  | 4.721841  | 0.202907  | -0.871116 |
| Br | 2.763011  | -1.878772 | -1.182643 |

SCF Energy (SMD/wB97XD/6-31+G\*\*) =  
-6264.2592252

SCF Energy (B3LYP/6-31G\*\*) =  
-6264.29209561

## 1p\_C008

## MMFF Geometry

|    |           |           |           |
|----|-----------|-----------|-----------|
| C  | -1.346302 | 0.043182  | 0.882411  |
| C  | -3.086360 | 1.015805  | -0.782406 |
| C  | -0.183589 | 1.044055  | 0.287920  |
| C  | -2.388542 | -0.241293 | -0.257788 |
| H  | -3.908970 | 1.321939  | -0.126051 |
| H  | -1.912888 | -0.780152 | -1.085041 |
| C  | -2.152017 | 2.164609  | -0.933334 |
| H  | -2.581562 | 3.024564  | -1.447244 |
| C  | -0.879898 | 2.215361  | -0.494879 |
| O  | -3.648690 | 0.774651  | -2.073256 |
| H  | -2.916164 | 0.605549  | -2.689874 |
| Br | -3.811516 | -1.526670 | 0.264767  |
| C  | -2.048852 | 0.702152  | 2.104053  |
| H  | -2.938289 | 0.148228  | 2.419091  |
| H  | -2.363475 | 1.730186  | 1.901644  |
| H  | -1.388523 | 0.719871  | 2.978049  |
| C  | -0.798498 | -1.316951 | 1.373900  |
| H  | -1.550334 | -1.877141 | 1.941278  |
| H  | 0.040024  | -1.213637 | 2.057368  |
| H  | -0.496911 | -1.956206 | 0.538657  |
| C  | -0.103068 | 3.478683  | -0.812847 |
| H  | -0.010781 | 4.108170  | 0.077885  |
| H  | -0.598048 | 4.083651  | -1.581436 |
| H  | 0.895042  | 3.251584  | -1.196524 |
| C  | 0.714233  | 1.681215  | 1.409959  |
| H  | 1.198896  | 2.588562  | 1.036981  |
| H  | 0.109735  | 2.042752  | 2.247060  |
| C  | 0.746136  | 0.325781  | -0.751442 |
| H  | 1.171344  | 1.071661  | -1.435727 |
| H  | 0.149546  | -0.321290 | -1.405080 |
| C  | 1.867330  | 0.834545  | 1.948994  |
| H  | 2.455152  | 1.457696  | 2.637661  |
| H  | 1.478276  | 0.027564  | 2.573563  |
| C  | 1.916775  | -0.487383 | -0.174224 |
| H  | 1.550259  | -1.407556 | 0.284386  |
| C  | 2.782859  | 0.286861  | 0.836361  |
| Cl | 3.953901  | -0.840164 | 1.637102  |
| C  | 3.606389  | 1.429633  | 0.216961  |
| H  | 4.109460  | 2.017522  | 0.994120  |
| H  | 2.984510  | 2.120877  | -0.358839 |
| H  | 4.389311  | 1.060503  | -0.453809 |
| Br | 2.960888  | -1.181811 | -1.701185 |

SCF Energy (SMD/wB97XD/6-31+G\*\*) =  
-6264.2603597

SCF Energy (B3LYP/6-31G\*\*) =  
-6264.29372422

## 1p\_C009

## MMFF Geometry

|    |           |           |           |
|----|-----------|-----------|-----------|
| C  | -1.340162 | 0.020154  | 0.881111  |
| C  | -3.078956 | 1.011525  | -0.774290 |
| C  | -0.181168 | 1.034940  | 0.306497  |
| C  | -2.377598 | -0.249320 | -0.266803 |
| H  | -3.914419 | 1.294923  | -0.122828 |
| H  | -1.902770 | -0.779490 | -1.100206 |
| C  | -2.151197 | 2.169309  | -0.899381 |
| H  | -2.569556 | 3.036282  | -1.407981 |
| C  | -0.881897 | 2.219840  | -0.451258 |
| O  | -3.605902 | 0.763769  | -2.078116 |
| H  | -4.247634 | 1.467843  | -2.269633 |
| Br | -3.807622 | -1.539100 | 0.244810  |
| C  | -2.047105 | 0.656335  | 2.112529  |
| H  | -2.933529 | 0.093138  | 2.419215  |
| H  | -2.367240 | 1.685658  | 1.925994  |
| H  | -1.387448 | 0.663810  | 2.987155  |
| C  | -0.789033 | -1.346465 | 1.350328  |
| H  | -1.540199 | -1.918692 | 1.906439  |
| H  | 0.047818  | -1.252457 | 2.037093  |
| H  | -0.484052 | -1.970527 | 0.504916  |
| C  | -0.107053 | 3.489898  | -0.746268 |
| H  | -0.602159 | 4.108108  | -1.504130 |
| H  | 0.891885  | 3.271855  | -1.132965 |
| H  | -0.016812 | 4.103392  | 0.155784  |
| C  | 0.715833  | 1.652262  | 1.440225  |
| H  | 1.197636  | 2.568207  | 1.084981  |
| H  | 0.111231  | 1.995546  | 2.284873  |
| C  | 0.749927  | 0.339869  | -0.748050 |
| H  | 1.172982  | 1.100296  | -1.417432 |
| H  | 0.154765  | -0.295405 | -1.414360 |
| C  | 1.871815  | 0.798549  | 1.961295  |
| H  | 2.458818  | 1.409986  | 2.661092  |
| H  | 1.486051  | -0.021319 | 2.570863  |
| C  | 1.922567  | -0.481873 | -0.187725 |
| H  | 1.558433  | -1.411515 | 0.253326  |
| C  | 2.787346  | 0.274901  | 0.837253  |
| Cl | 3.962554  | -0.863774 | 1.616044  |
| C  | 3.607446  | 1.431819  | 0.239732  |
| H  | 4.109415  | 2.005840  | 1.027898  |
| H  | 2.983359  | 2.132486  | -0.322097 |
| H  | 4.390996  | 1.078015  | -0.438512 |
| Br | 2.969955  | -1.144398 | -1.726766 |

SCF Energy (SMD/wB97XD/6-31+G\*\*) =  
-6264.2592986

SCF Energy (B3LYP/6-31G\*\*) =  
-6264.29209230

## 1p\_C010

## MMFF Geometry

|    |           |           |           |
|----|-----------|-----------|-----------|
| C  | 1.256150  | -0.181776 | -0.982875 |
| C  | 3.381954  | -1.318066 | 0.027314  |
| C  | 0.427954  | -0.374833 | 0.418588  |
| C  | 2.818599  | -0.151962 | -0.784126 |
| H  | 4.372836  | -1.070934 | 0.425773  |
| H  | 3.299490  | -0.152145 | -1.771829 |
| C  | 2.501865  | -1.725177 | 1.157068  |
| H  | 2.973800  | -2.400987 | 1.868911  |
| C  | 1.232718  | -1.328471 | 1.373438  |
| O  | 3.574683  | -2.452322 | -0.818013 |
| H  | 3.822763  | -3.202947 | -0.252722 |
| Br | 3.522498  | 1.523598  | -0.010310 |
| C  | 0.869645  | 1.059147  | -1.825131 |
| H  | 1.462585  | 1.097219  | -2.748374 |
| H  | 1.054606  | 2.001690  | -1.307185 |
| H  | -0.173597 | 1.046545  | -2.141527 |
| C  | 0.974585  | -1.389963 | -1.936005 |
| H  | 1.652044  | -1.382540 | -2.798595 |
| H  | -0.040517 | -1.352129 | -2.346757 |
| H  | 1.094878  | -2.354545 | -1.434006 |
| C  | 0.564604  | -1.876364 | 2.623379  |
| H  | 1.295455  | -2.268865 | 3.340173  |
| H  | -0.106419 | -2.702675 | 2.367662  |
| H  | -0.004874 | -1.113176 | 3.158007  |
| C  | 0.183827  | 0.969210  | 1.188607  |
| H  | -0.024896 | 0.763435  | 2.244211  |
| H  | 1.088590  | 1.576197  | 1.217490  |
| C  | -0.984169 | -1.041092 | 0.204712  |
| H  | -1.368007 | -1.410662 | 1.162005  |
| H  | -0.899262 | -1.953692 | -0.395429 |
| C  | -0.971535 | 1.857260  | 0.698084  |
| H  | -1.090944 | 2.684177  | 1.412006  |
| H  | -0.697451 | 2.343165  | -0.240723 |
| C  | -2.074835 | -0.126248 | -0.355163 |
| H  | -1.840850 | 0.158716  | -1.382176 |
| C  | -2.310881 | 1.116139  | 0.526227  |
| Cl | -3.440751 | 2.258181  | -0.312863 |
| C  | -2.916482 | 0.819918  | 1.910273  |
| H  | -2.995849 | 1.736625  | 2.507426  |
| H  | -2.308176 | 0.117573  | 2.487316  |
| H  | -3.926066 | 0.402180  | 1.841825  |
| Br | -3.707322 | -1.214428 | -0.584463 |

SCF Energy (SMD/wB97XD/6-31+G\*\*) =  
-6264.2537213

SCF Energy (B3LYP/6-31G\*\*) =  
-6264.28961815



## 1p\_C011

## MMFF Geometry

|    |           |           |           |
|----|-----------|-----------|-----------|
| C  | 1.261380  | -0.201494 | -0.968721 |
| C  | 3.392877  | -1.301568 | 0.079736  |
| C  | 0.418220  | -0.401528 | 0.422088  |
| C  | 2.820379  | -0.153973 | -0.752489 |
| H  | 4.355662  | -1.028107 | 0.527718  |
| H  | 3.309726  | -0.163144 | -1.736012 |
| C  | 2.487266  | -1.747037 | 1.169881  |
| H  | 2.948769  | -2.454988 | 1.857342  |
| C  | 1.209772  | -1.369859 | 1.369268  |
| O  | 3.648505  | -2.445864 | -0.734243 |
| H  | 4.408608  | -2.232724 | -1.301671 |
| Br | 3.506818  | 1.540280  | -0.007941 |
| C  | 0.869654  | 1.030699  | -1.820810 |
| H  | 1.473421  | 1.071964  | -2.736925 |
| H  | 1.036977  | 1.977558  | -1.305282 |
| H  | -0.168768 | 1.004679  | -2.150603 |
| C  | 1.007974  | -1.418278 | -1.919614 |
| H  | 1.696201  | -1.406197 | -2.773606 |
| H  | -0.002064 | -1.395235 | -2.343797 |
| H  | 1.135475  | -2.378793 | -1.411513 |
| C  | 0.521227  | -1.960744 | 2.587151  |
| H  | 1.240134  | -2.369523 | 3.306905  |
| H  | -0.138762 | -2.783198 | 2.293160  |
| H  | -0.063607 | -1.215645 | 3.131369  |
| C  | 0.180414  | 0.931354  | 1.210348  |
| H  | -0.039490 | 0.709079  | 2.260826  |
| H  | 1.090830  | 1.528635  | 1.257404  |
| C  | -0.997961 | -1.053280 | 0.186900  |
| H  | -1.391009 | -1.436520 | 1.134963  |
| H  | -0.916160 | -1.955599 | -0.428869 |
| C  | -0.962201 | 1.836555  | 0.722933  |
| H  | -1.077454 | 2.656890  | 1.445034  |
| H  | -0.677675 | 2.328845  | -0.209362 |
| C  | -2.080141 | -0.121789 | -0.361755 |
| H  | -1.842915 | 0.174765  | -1.384389 |
| C  | -2.307925 | 1.110674  | 0.535512  |
| Cl | -3.422479 | 2.275204  | -0.293466 |
| C  | -2.922863 | 0.801524  | 1.912506  |
| H  | -2.993272 | 1.710132  | 2.522986  |
| H  | -2.325860 | 0.082830  | 2.481162  |
| H  | -3.937310 | 0.397565  | 1.833796  |
| Br | -3.721555 | -1.192348 | -0.610499 |

SCF Energy (SMD/wB97XD/6-31+G\*\*) =  
-6264.2558681

SCF Energy (B3LYP/6-31G\*\*) =  
-6264.29145051

## 1p\_C012

## MMFF Geometry

|    |           |           |           |
|----|-----------|-----------|-----------|
| C  | -1.516483 | -0.046946 | 1.160985  |
| C  | -3.034488 | -1.540307 | -0.331432 |
| C  | -0.221824 | -0.320431 | 0.187787  |
| C  | -2.889525 | -0.218104 | 0.427639  |
| H  | -3.712278 | -1.436166 | -1.186187 |
| H  | -3.694395 | -0.150349 | 1.172319  |
| C  | -1.745908 | -2.122926 | -0.812089 |
| H  | -1.863525 | -3.038371 | -1.390215 |
| C  | -0.503089 | -1.638031 | -0.605310 |
| O  | -3.642928 | -2.504752 | 0.534006  |
| H  | -3.707673 | -3.340629 | 0.042764  |
| Br | -3.381091 | 1.263256  | -0.777214 |
| C  | -1.487990 | 1.333195  | 1.880828  |
| H  | -2.377326 | 1.450803  | 2.512995  |
| H  | -1.476306 | 2.185880  | 1.200172  |
| H  | -0.625521 | 1.443078  | 2.543902  |
| C  | -1.522060 | -1.093224 | 2.333222  |
| H  | -2.459897 | -1.041409 | 2.899622  |
| H  | -0.720352 | -0.909549 | 3.055925  |
| H  | -1.407895 | -2.122690 | 1.982421  |
| C  | 0.628472  | -2.428468 | -1.206533 |
| H  | 0.272786  | -3.235227 | -1.858713 |
| H  | 1.213118  | -2.910914 | -0.420357 |
| H  | 1.264205  | -1.802864 | -1.832019 |
| C  | -0.069050 | 0.805123  | -0.883490 |
| H  | -0.686789 | 0.580337  | -1.762753 |
| H  | -0.456535 | 1.751498  | -0.504561 |
| C  | 1.068939  | -0.429322 | 1.103066  |
| H  | 1.181070  | -1.462173 | 1.458330  |
| H  | 0.876039  | 0.139209  | 2.017560  |
| C  | 1.339109  | 1.099108  | -1.403053 |
| H  | 1.676549  | 0.282534  | -2.048831 |
| H  | 1.282062  | 1.978404  | -2.059493 |
| C  | 2.430174  | 0.132617  | 0.641677  |
| H  | 2.993684  | 0.411557  | 1.543079  |
| C  | 2.359615  | 1.348051  | -0.291039 |
| Cl | 1.814670  | 2.773674  | 0.707508  |
| C  | 3.708101  | 1.770705  | -0.894211 |
| H  | 3.624648  | 2.729558  | -1.420523 |
| H  | 4.074177  | 1.048939  | -1.631601 |
| H  | 4.474449  | 1.884572  | -0.118978 |
| Br | 3.589257  | -1.304876 | -0.032581 |

SCF Energy (SMD/wB97XD/6-31+G\*\*) =  
-6264.2424572

SCF Energy (B3LYP/6-31G\*\*) =  
-6264.28282751

**1p\_C013****MMFF Geometry**

|    |           |           |           |
|----|-----------|-----------|-----------|
| C  | -1.511718 | -0.090596 | 1.155354  |
| C  | -3.003816 | -1.540473 | -0.416271 |
| C  | -0.209428 | -0.340074 | 0.188402  |
| C  | -2.877187 | -0.254227 | 0.407211  |
| H  | -3.617564 | -1.395021 | -1.312722 |
| H  | -3.684872 | -0.232474 | 1.151540  |
| C  | -1.706593 | -2.137489 | -0.842705 |
| H  | -1.822435 | -3.067368 | -1.398785 |
| C  | -0.467180 | -1.660980 | -0.601823 |
| O  | -3.667056 | -2.547098 | 0.355017  |
| H  | -4.597341 | -2.276768 | 0.438912  |
| Br | -3.398487 | 1.274373  | -0.723879 |
| C  | -1.494076 | 1.275366  | 1.902957  |
| H  | -2.405818 | 1.392901  | 2.502393  |
| H  | -1.442366 | 2.139939  | 1.239408  |
| H  | -0.658574 | 1.361633  | 2.603140  |
| C  | -1.523763 | -1.159972 | 2.305917  |
| H  | -2.452625 | -1.098997 | 2.886124  |
| H  | -0.707332 | -1.008116 | 3.019396  |
| H  | -1.439884 | -2.184846 | 1.934059  |
| C  | 0.676165  | -2.468556 | -1.154056 |
| H  | 0.334289  | -3.294805 | -1.789003 |
| H  | 1.245983  | -2.926959 | -0.342919 |
| H  | 1.322885  | -1.859314 | -1.785010 |
| C  | -0.077043 | 0.785195  | -0.884005 |
| H  | -0.703861 | 0.557315  | -1.756124 |
| H  | -0.465638 | 1.729436  | -0.500722 |
| C  | 1.080836  | -0.421941 | 1.106590  |
| H  | 1.206756  | -1.448966 | 1.473588  |
| H  | 0.879049  | 0.152552  | 2.015181  |
| C  | 1.325683  | 1.080874  | -1.416175 |
| H  | 1.665186  | 0.255563  | -2.050007 |
| H  | 1.259303  | 1.949753  | -2.085350 |
| C  | 2.434758  | 0.153169  | 0.638993  |
| H  | 2.991834  | 0.453752  | 1.537463  |
| C  | 2.348973  | 1.354036  | -0.311647 |
| Cl | 1.794505  | 2.788461  | 0.670648  |
| C  | 3.690385  | 1.781826  | -0.926693 |
| H  | 3.594901  | 2.732432  | -1.465766 |
| H  | 4.060173  | 1.053567  | -1.655823 |
| H  | 4.459037  | 1.914195  | -0.156703 |
| Br | 3.618282  | -1.276184 | -0.009141 |

**SCF Energy (SMD/wB97XD/6-31+G\*\*) =**  
**-6264.2442034**

**SCF Energy (B3LYP/6-31G\*\*) =**  
**-6264.28435788**

**1p\_C014****MMFF Geometry**

|    |           |           |           |
|----|-----------|-----------|-----------|
| C  | -1.519472 | -0.076372 | 1.154358  |
| C  | -3.019345 | -1.546533 | -0.391155 |
| C  | -0.218980 | -0.332570 | 0.184762  |
| C  | -2.889743 | -0.247857 | 0.412580  |
| H  | -3.656898 | -1.406300 | -1.270778 |
| H  | -3.697461 | -0.212078 | 1.156210  |
| C  | -1.723176 | -2.131738 | -0.845398 |
| H  | -1.842561 | -3.043161 | -1.431668 |
| C  | -0.483919 | -1.652086 | -0.610612 |
| O  | -3.687813 | -2.534539 | 0.401658  |
| H  | -3.013880 | -3.068233 | 0.854973  |
| Br | -3.396273 | 1.267538  | -0.746017 |
| C  | -1.501818 | 1.296705  | 1.889478  |
| H  | -2.401804 | 1.408359  | 2.507514  |
| H  | -1.475400 | 2.156626  | 1.218482  |
| H  | -0.651395 | 1.399232  | 2.569198  |
| C  | -1.518992 | -1.132569 | 2.316700  |
| H  | -2.466710 | -1.110675 | 2.868043  |
| H  | -0.733090 | -0.934516 | 3.053237  |
| H  | -1.368679 | -2.154809 | 1.960403  |
| C  | 0.657038  | -2.442659 | -1.193396 |
| H  | 0.311325  | -3.257214 | -1.841242 |
| H  | 1.236500  | -2.915341 | -0.397460 |
| H  | 1.295359  | -1.818952 | -1.818331 |
| C  | -0.078690 | 0.795947  | -0.884286 |
| H  | -0.699445 | 0.569871  | -1.761152 |
| H  | -0.470163 | 1.738991  | -0.501179 |
| C  | 1.071122  | -0.426443 | 1.102465  |
| H  | 1.193011  | -1.457155 | 1.460590  |
| H  | 0.871219  | 0.141609  | 2.015626  |
| C  | 1.326359  | 1.097626  | -1.407554 |
| H  | 1.668505  | 0.280268  | -2.049965 |
| H  | 1.262199  | 1.973840  | -2.067393 |
| C  | 2.427491  | 0.147710  | 0.640598  |
| H  | 2.986439  | 0.436188  | 1.541853  |
| C  | 2.346283  | 1.358610  | -0.297331 |
| Cl | 1.790444  | 2.782743  | 0.697818  |
| C  | 3.690513  | 1.790291  | -0.903327 |
| H  | 3.598479  | 2.746418  | -1.433145 |
| H  | 4.061816  | 1.068735  | -1.638317 |
| H  | 4.456639  | 1.913546  | -0.129316 |
| Br | 3.602357  | -1.281080 | -0.023973 |

**SCF Energy (SMD/wB97XD/6-31+G\*\*) =**  
**-6264.2446890**

**SCF Energy (B3LYP/6-31G\*\*) =**  
**-6264.28521885**

**1p\_C015****MMFF Geometry**

|    |           |           |           |
|----|-----------|-----------|-----------|
| C  | 1.378257  | -0.491185 | -1.024076 |
| C  | 3.408463  | -0.861340 | 0.595255  |
| C  | 0.396322  | -0.664447 | 0.254074  |
| C  | 2.831630  | -0.082200 | -0.602653 |
| H  | 3.912481  | -0.206861 | 1.315444  |
| H  | 3.494503  | -0.217009 | -1.468184 |
| C  | 2.426866  | -1.693296 | 1.356374  |
| H  | 2.883001  | -2.394485 | 2.054165  |
| C  | 1.084568  | -1.662903 | 1.226415  |
| O  | 4.407145  | -1.772716 | 0.122840  |
| H  | 5.171418  | -1.238659 | -0.154672 |
| Br | 3.092532  | 1.849412  | -0.286720 |
| C  | 0.820636  | 0.473256  | -2.101875 |
| H  | 1.550519  | 0.617685  | -2.907943 |
| H  | 0.569639  | 1.462152  | -1.713069 |
| H  | -0.083546 | 0.071529  | -2.571581 |
| C  | 1.541116  | -1.857055 | -1.785714 |
| H  | 2.288782  | -1.767293 | -2.583943 |
| H  | 0.618013  | -2.177076 | -2.277051 |
| H  | 1.866380  | -2.675088 | -1.137564 |
| C  | 0.277625  | -2.636303 | 2.050898  |
| H  | 0.894919  | -3.165165 | 2.786197  |
| H  | -0.170597 | -3.400351 | 1.407566  |
| H  | -0.511771 | -2.134878 | 2.613832  |
| C  | 0.229767  | 0.685232  | 1.042375  |
| H  | 1.084225  | 0.855128  | 1.708656  |
| H  | 0.199650  | 1.539020  | 0.360054  |
| C  | -1.037116 | -1.149474 | -0.188511 |
| H  | -1.463330 | -1.865325 | 0.520191  |
| H  | -0.990390 | -1.704560 | -1.127910 |
| C  | -1.040486 | 0.753736  | 1.894154  |
| H  | -1.013990 | -0.058779 | 2.626901  |
| H  | -1.021101 | 1.672322  | 2.495105  |
| C  | -2.044875 | 0.000460  | -0.312541 |
| H  | -1.660963 | 0.735251  | -1.026964 |
| C  | -2.336301 | 0.676641  | 1.048659  |
| Cl | -2.895260 | 2.371280  | 0.720029  |
| C  | -3.418656 | 0.003376  | 1.908144  |
| H  | -3.484502 | 0.476121  | 2.895913  |
| H  | -3.193418 | -1.056567 | 2.069391  |
| H  | -4.416258 | 0.072838  | 1.462552  |
| Br | -3.654484 | -0.664755 | -1.220028 |

**SCF Energy (SMD/wB97XD/6-31+G\*\*) =**  
**-6264.2519115**

**SCF Energy (B3LYP/6-31G\*\*) =**  
**-6264.28481178**

**1p\_C016****MMFF Geometry**

|    |           |           |           |
|----|-----------|-----------|-----------|
| C  | 1.368030  | -0.504306 | -1.009992 |
| C  | 3.455431  | -0.879398 | 0.515652  |
| C  | 0.412702  | -0.609800 | 0.300260  |
| C  | 2.833417  | -0.084814 | -0.645244 |
| H  | 4.099465  | -0.247966 | 1.137690  |
| H  | 3.463311  | -0.209522 | -1.536755 |
| C  | 2.480844  | -1.588592 | 1.404205  |
| H  | 2.937793  | -2.228699 | 2.157071  |
| C  | 1.134734  | -1.527432 | 1.331551  |
| O  | 4.309087  | -1.885439 | -0.043695 |
| H  | 4.777204  | -2.313036 | 0.692905  |
| Br | 3.088642  | 1.843919  | -0.317386 |
| C  | 0.802443  | 0.415406  | -2.122171 |
| H  | 1.519584  | 0.510399  | -2.946958 |
| H  | 0.573385  | 1.426270  | -1.779780 |
| H  | -0.113984 | 0.003071  | -2.557166 |
| C  | 1.498956  | -1.906144 | -1.709557 |
| H  | 2.275380  | -1.882502 | -2.484457 |
| H  | 0.579369  | -2.205620 | -2.221245 |
| H  | 1.761590  | -2.709414 | -1.016132 |
| C  | 0.347103  | -2.392077 | 2.288214  |
| H  | 0.985601  | -2.848718 | 3.053310  |
| H  | -0.134804 | -3.214340 | 1.749550  |
| H  | -0.413426 | -1.822782 | 2.823834  |
| C  | 0.223978  | 0.785899  | 0.999347  |
| H  | 1.068703  | 1.001982  | 1.664683  |
| H  | 0.196352  | 1.594179  | 0.264276  |
| C  | -1.016293 | -1.156007 | -0.080507 |
| H  | -1.426128 | -1.801886 | 0.701689  |
| H  | -0.967815 | -1.804686 | -0.957552 |
| C  | -1.056338 | 0.910670  | 1.830393  |
| H  | -1.030435 | 0.163472  | 2.628642  |
| H  | -1.050272 | 1.875625  | 2.354258  |
| C  | -2.041858 | -0.038096 | -0.307882 |
| H  | -1.670490 | 0.637182  | -1.083963 |
| C  | -2.345716 | 0.752490  | 0.986940  |
| Cl | -2.912849 | 2.408264  | 0.508818  |
| C  | -3.429660 | 0.150600  | 1.896280  |
| H  | -3.503495 | 0.707151  | 2.838801  |
| H  | -3.199888 | -0.890033 | 2.150407  |
| H  | -4.425128 | 0.175726  | 1.441255  |
| Br | -3.639008 | -0.808011 | -1.152318 |

**SCF Energy (SMD/wB97XD/6-31+G\*\*) =**  
**-6264.2499748**

**SCF Energy (B3LYP/6-31G\*\*) =**  
**-6264.28481178**

**1p\_C017****MMFF Geometry**

|    |           |           |           |
|----|-----------|-----------|-----------|
| C  | 1.379251  | -0.500440 | -1.008217 |
| C  | 3.440836  | -0.862494 | 0.567365  |
| C  | 0.410238  | -0.629704 | 0.288238  |
| C  | 2.841473  | -0.084107 | -0.618865 |
| H  | 4.016690  | -0.208338 | 1.230460  |
| H  | 3.488896  | -0.220834 | -1.495672 |
| C  | 2.460165  | -1.621072 | 1.405361  |
| H  | 2.921391  | -2.269131 | 2.150552  |
| C  | 1.116052  | -1.579035 | 1.301107  |
| O  | 4.383126  | -1.820348 | 0.068277  |
| H  | 3.882958  | -2.575497 | -0.284582 |
| Br | 3.092331  | 1.850083  | -0.311894 |
| C  | 0.819918  | 0.435744  | -2.110457 |
| H  | 1.543336  | 0.545824  | -2.927795 |
| H  | 0.583555  | 1.439737  | -1.752909 |
| H  | -0.092663 | 0.028991  | -2.558874 |
| C  | 1.515772  | -1.890245 | -1.729875 |
| H  | 2.307075  | -1.858595 | -2.489085 |
| H  | 0.603762  | -2.174803 | -2.263519 |
| H  | 1.757003  | -2.708044 | -1.046299 |
| C  | 0.317371  | -2.481468 | 2.211950  |
| H  | 0.945625  | -2.962374 | 2.970591  |
| H  | -0.150680 | -3.285784 | 1.635274  |
| H  | -0.455671 | -1.934837 | 2.753874  |
| C  | 0.229733  | 0.750796  | 1.018406  |
| H  | 1.077623  | 0.950337  | 1.684895  |
| H  | 0.202546  | 1.575118  | 0.301108  |
| C  | -1.019542 | -1.153166 | -0.119456 |
| H  | -1.437364 | -1.826039 | 0.635133  |
| H  | -0.969494 | -1.767913 | -1.020786 |
| C  | -1.048177 | 0.857575  | 1.855305  |
| H  | -1.023471 | 0.087484  | 2.631877  |
| H  | -1.037527 | 1.807415  | 2.405936  |
| C  | -2.037661 | -0.021674 | -0.311047 |
| H  | -1.659864 | 0.675681  | -1.064592 |
| C  | -2.338926 | 0.728204  | 1.008569  |
| Cl | -2.903288 | 2.398907  | 0.582680  |
| C  | -3.423225 | 0.099578  | 1.899016  |
| H  | -3.495977 | 0.626475  | 2.858502  |
| H  | -3.194748 | -0.948788 | 2.120344  |
| H  | -4.418796 | 0.140086  | 1.445348  |
| Br | -3.637560 | -0.754247 | -1.182847 |

**SCF Energy (SMD/wB97XD/6-31+G\*\*) =**  
**-6264.2521069**

**SCF Energy (B3LYP/6-31G\*\*) =**  
**-6264.28693015**

**2a\_C001****MMFF Geometry**

|    |           |           |           |
|----|-----------|-----------|-----------|
| C  | -0.380364 | 1.420165  | -1.148891 |
| C  | 1.523633  | 0.151071  | -0.034127 |
| C  | -0.812670 | -0.124589 | 0.888936  |
| C  | 0.544617  | -0.857928 | 0.621824  |
| C  | -1.366782 | 0.604199  | -0.330257 |
| C  | 0.980668  | 0.750740  | -1.331483 |
| H  | -1.525184 | -0.881413 | 1.232074  |
| H  | 1.698170  | 1.470879  | -1.747887 |
| H  | -0.787910 | 1.609922  | -2.148796 |
| H  | 1.772966  | 0.953657  | 0.669509  |
| H  | 0.887780  | -0.031271 | -2.096552 |
| Cl | -0.186163 | 3.046667  | -0.428607 |
| Br | 3.277716  | -0.645171 | -0.443676 |
| C  | 0.244909  | -2.079049 | -0.289835 |
| H  | -0.195262 | -1.792319 | -1.249295 |
| H  | -0.466745 | -2.756999 | 0.197118  |
| H  | 1.144483  | -2.665947 | -0.500028 |
| C  | 1.120480  | -1.419380 | 1.944645  |
| H  | 1.935079  | -2.129429 | 1.765423  |
| H  | 0.350643  | -1.957502 | 2.509950  |
| H  | 1.519143  | -0.627246 | 2.587056  |
| Cl | -0.739491 | 1.039612  | 2.255943  |
| C  | -2.653150 | 0.503571  | -0.738541 |
| H  | -2.959901 | 1.033747  | -1.640508 |
| C  | -3.774181 | -0.225909 | -0.064388 |
| H  | -3.633737 | -0.322021 | 1.015118  |
| H  | -4.718180 | 0.302987  | -0.227575 |
| Cl | -3.915779 | -1.848832 | -0.765232 |

**SCF Energy (SMD/wB97XD/6-31+G\*\*) =**  
**-4341.7383593**

**SCF Energy (B3LYP/6-31G\*\*) =**  
**-4341.80544998**

**2a\_C002****MMFF Geometry**

|   |           |           |           |
|---|-----------|-----------|-----------|
| C | -0.436009 | 1.482327  | -0.697433 |
| C | 1.646444  | 0.235781  | 0.067328  |
| C | -0.613682 | -0.823193 | 0.472641  |
| C | 0.886005  | -1.115244 | 0.126520  |
| C | -1.255739 | 0.229916  | -0.423300 |
| C | 1.047057  | 1.211924  | -0.945153 |
| H | -1.150906 | -1.771908 | 0.382673  |
| H | 1.605338  | 2.158035  | -0.938511 |
| H | -0.824826 | 2.000183  | -1.582062 |
| H | 1.676765  | 0.701109  | 1.059248  |
| H | 1.167616  | 0.818982  | -1.963251 |

|    |           |           |           |
|----|-----------|-----------|-----------|
| Cl | -0.640715 | 2.657656  | 0.635365  |
| Br | 3.551141  | 0.017811  | -0.384053 |
| C  | 0.913592  | -1.876643 | -1.227041 |
| H  | 0.470442  | -1.301047 | -2.044855 |
| H  | 0.346989  | -2.812971 | -1.153128 |
| H  | 1.930912  | -2.148006 | -1.525858 |
| C  | 1.506623  | -2.061714 | 1.183058  |
| H  | 2.467487  | -2.469243 | 0.850608  |
| H  | 0.849853  | -2.917971 | 1.376082  |
| H  | 1.685344  | -1.551860 | 2.135538  |
| Cl | -0.871117 | -0.349644 | 2.184977  |
| C  | -2.469234 | 0.090698  | -1.007399 |
| H  | -2.823205 | 0.895913  | -1.653664 |
| C  | -3.453746 | -1.030704 | -0.859817 |
| H  | -3.549500 | -1.570676 | -1.805977 |
| H  | -3.196879 | -1.742115 | -0.074170 |
| Cl | -5.051299 | -0.365113 | -0.453121 |

**SCF Energy (SMD/wB97XD/6-31+G\*\*) =**  
**-4341.7372877**  
**SCF Energy (B3LYP/6-31G\*\*) =**  
**-4341.80458500**

**2b\_C001**

**MMFF Geometry**

|    |           |           |           |
|----|-----------|-----------|-----------|
| C  | 0.955683  | -0.119002 | 1.136914  |
| C  | -1.460549 | -0.047976 | 0.321356  |
| C  | 0.315572  | 1.069193  | -1.077606 |
| C  | -1.018624 | 0.255688  | -1.134503 |
| C  | 1.393523  | 0.424765  | -0.211106 |
| C  | -0.405143 | -0.816507 | 1.116399  |
| H  | 0.687852  | 1.177502  | -2.104103 |
| H  | -0.752800 | -0.986960 | 2.144489  |
| H  | 1.676119  | -0.853621 | 1.509126  |
| H  | -1.715596 | 0.880071  | 0.845792  |
| H  | -0.275967 | -1.820992 | 0.691879  |
| Cl | 0.973143  | 1.189080  | 2.356080  |
| Br | -3.132972 | -1.084445 | 0.408188  |
| C  | -0.749724 | -1.031588 | -1.959875 |
| H  | 0.026560  | -1.663067 | -1.518020 |
| H  | -0.414170 | -0.775795 | -2.972357 |
| H  | -1.650288 | -1.643457 | -2.071948 |
| C  | -2.103082 | 1.056241  | -1.895715 |
| H  | -2.964282 | 0.430854  | -2.154783 |
| H  | -1.707108 | 1.454971  | -2.836992 |
| H  | -2.481901 | 1.897415  | -1.305792 |
| Cl | 0.090803  | 2.766539  | -0.527015 |
| C  | 2.655045  | 0.307191  | -0.686678 |
| H  | 2.880829  | 0.698468  | -1.678910 |

|    |          |           |           |
|----|----------|-----------|-----------|
| C  | 3.848176 | -0.266100 | 0.014375  |
| H  | 3.758120 | -0.244696 | 1.103143  |
| H  | 4.747439 | 0.296862  | -0.253626 |
| Cl | 4.068639 | -1.948761 | -0.501173 |

**SCF Energy (SMD/wB97XD/6-31+G\*\*) =**  
**-4341.7379085**  
**SCF Energy (B3LYP/6-31G\*\*) =**  
**-4341.80587360**

**2b\_C002**

**MMFF Geometry**

|    |           |           |           |
|----|-----------|-----------|-----------|
| C  | 0.746510  | -1.233325 | -0.013364 |
| C  | -1.609808 | -0.268101 | 0.165076  |
| C  | 0.344315  | 1.324367  | 0.103475  |
| C  | -1.139228 | 1.118910  | -0.346502 |
| C  | 1.268487  | 0.167850  | -0.274121 |
| C  | -0.736695 | -1.416567 | -0.340240 |
| H  | 0.710083  | 2.250513  | -0.357449 |
| H  | -1.093325 | -2.372693 | 0.066715  |
| H  | 1.287342  | -1.964199 | -0.621409 |
| H  | -1.642883 | -0.282384 | 1.260513  |
| H  | -0.844035 | -1.515820 | -1.428642 |
| Cl | 1.080329  | -1.712183 | 1.674811  |
| Br | -3.468209 | -0.675559 | -0.344841 |
| C  | -1.181872 | 1.233747  | -1.894223 |
| H  | -0.560852 | 0.483011  | -2.391467 |
| H  | -0.814636 | 2.215655  | -2.216938 |
| H  | -2.199038 | 1.134047  | -2.285899 |
| C  | -2.031439 | 2.254993  | 0.210256  |
| H  | -3.015788 | 2.272244  | -0.270015 |
| H  | -1.574645 | 3.235283  | 0.030962  |
| H  | -2.200699 | 2.153537  | 1.287352  |
| Cl | 0.513070  | 1.632788  | 1.866756  |
| C  | 2.465600  | 0.431624  | -0.848863 |
| H  | 2.736860  | 1.474803  | -1.019182 |
| C  | 3.531812  | -0.538951 | -1.261510 |
| H  | 3.628627  | -0.547340 | -2.350758 |
| H  | 3.354736  | -1.558430 | -0.916106 |
| Cl | 5.093041  | -0.025366 | -0.583812 |

**SCF Energy (SMD/wB97XD/6-31+G\*\*) =**  
**-4341.7371911**  
**SCF Energy (B3LYP/6-31G\*\*) =**  
**-4341.80468667**

**2c\_C001**

**MMFF Geometry**

|   |           |           |           |
|---|-----------|-----------|-----------|
| C | -0.115621 | 1.451665  | -1.013794 |
| C | 1.335033  | -0.697747 | -1.034350 |

|    |           |           |           |
|----|-----------|-----------|-----------|
| C  | -0.650679 | -0.491033 | 0.609887  |
| C  | 0.232739  | -1.449540 | -0.245180 |
| C  | -1.136224 | 0.732966  | -0.151792 |
| C  | 0.826522  | 0.529588  | -1.794926 |
| H  | -1.510455 | -1.080320 | 0.944943  |
| H  | 1.659868  | 1.105608  | -2.218275 |
| H  | -0.637232 | 2.063860  | -1.759645 |
| H  | 1.775911  | -1.385043 | -1.768341 |
| H  | 0.269092  | 0.164801  | -2.668816 |
| Cl | 0.776654  | 2.649594  | -0.034509 |
| Br | 2.912945  | -0.213385 | 0.020149  |
| C  | -0.704514 | -2.131561 | -1.291658 |
| H  | -1.209391 | -1.409398 | -1.940446 |
| H  | -1.486333 | -2.719117 | -0.795658 |
| H  | -0.141270 | -2.815877 | -1.936922 |
| C  | 0.799579  | -2.615556 | 0.599558  |
| H  | 1.373786  | -3.308349 | -0.026769 |
| H  | -0.010396 | -3.188859 | 1.066079  |
| H  | 1.458271  | -2.285466 | 1.407060  |
| Cl | 0.092781  | 0.047947  | 2.146256  |
| C  | -2.422059 | 1.156355  | -0.142043 |
| H  | -2.691653 | 2.027359  | -0.739824 |
| C  | -3.563391 | 0.602760  | 0.654251  |
| H  | -3.243367 | 0.105699  | 1.573337  |
| H  | -4.249454 | 1.407134  | 0.936692  |
| Cl | -4.452891 | -0.564655 | -0.342239 |

**SCF Energy (SMD/wB97XD/6-31+G\*\*) =**  
**-4341.7316210**

**SCF Energy (B3LYP/6-31G\*\*) =**  
**-4341.79550996**

**2c\_C002**

**MMFF Geometry**

|    |           |           |           |
|----|-----------|-----------|-----------|
| C  | -0.265464 | -1.163714 | 1.196360  |
| C  | 1.763861  | 0.429984  | 0.940967  |
| C  | -0.451229 | 0.940942  | -0.294805 |
| C  | 0.828392  | 1.529253  | 0.375703  |
| C  | -1.151420 | -0.113522 | 0.548606  |
| C  | 1.042540  | -0.623929 | 1.784688  |
| H  | -1.126653 | 1.786697  | -0.457252 |
| H  | 1.715595  | -1.452292 | 2.042239  |
| H  | -0.806536 | -1.632870 | 2.027184  |
| H  | 2.521884  | 0.904154  | 1.578219  |
| H  | 0.794513  | -0.157994 | 2.748450  |
| Cl | 0.018677  | -2.513283 | 0.062253  |
| Br | 2.894789  | -0.450449 | -0.393102 |
| C  | 0.358324  | 2.403666  | 1.581329  |
| H  | -0.220964 | 1.834978  | 2.315065  |

|    |           |           |           |
|----|-----------|-----------|-----------|
| H  | -0.276364 | 3.231485  | 1.243131  |
| H  | 1.214848  | 2.842120  | 2.106738  |
| C  | 1.568986  | 2.512469  | -0.562287 |
| H  | 2.434599  | 2.956921  | -0.057160 |
| H  | 0.908837  | 3.333539  | -0.866290 |
| H  | 1.933626  | 2.044296  | -1.480298 |
| Cl | -0.204904 | 0.295129  | -1.943803 |
| C  | -2.485762 | -0.134122 | 0.779932  |
| H  | -2.882773 | -0.919804 | 1.425059  |
| C  | -3.541035 | 0.772169  | 0.219404  |
| H  | -3.930889 | 1.423612  | 1.006445  |
| H  | -3.193704 | 1.388942  | -0.610545 |
| Cl | -4.896526 | -0.201685 | -0.393848 |

**SCF Energy (SMD/wB97XD/6-31+G\*\*) =**  
**-4341.7304104**

**SCF Energy (B3LYP/6-31G\*\*) =**  
**-4341.79412978**

**2c\_C003**

**MMFF Geometry**

|    |           |           |           |
|----|-----------|-----------|-----------|
| C  | -0.246153 | 1.549708  | -1.077402 |
| C  | 1.774656  | 0.189632  | -0.386013 |
| C  | -0.344633 | -0.927007 | -1.115886 |
| C  | 0.918768  | -1.105751 | -0.202289 |
| C  | -1.122674 | 0.340317  | -0.743799 |
| C  | 1.008250  | 1.505848  | -0.198963 |
| H  | 0.011893  | -0.782922 | -2.144626 |
| H  | 0.736573  | 1.642769  | 0.856733  |
| H  | 0.040980  | 1.497576  | -2.134088 |
| H  | 2.206828  | 0.189550  | -1.395475 |
| H  | 1.665788  | 2.347357  | -0.456689 |
| Cl | -1.023417 | 3.144870  | -0.902800 |
| Br | 3.356319  | 0.251147  | 0.778573  |
| C  | 1.739612  | -2.332993 | -0.669686 |
| H  | 2.013095  | -2.244487 | -1.727051 |
| H  | 1.184079  | -3.268226 | -0.544331 |
| H  | 2.664660  | -2.449788 | -0.096399 |
| C  | 0.498859  | -1.339207 | 1.267266  |
| H  | 1.358915  | -1.574228 | 1.902842  |
| H  | -0.188426 | -2.187475 | 1.355674  |
| H  | 0.001087  | -0.466380 | 1.700352  |
| Cl | -1.344428 | -2.395016 | -1.290379 |
| C  | -2.341772 | 0.446405  | -0.160512 |
| H  | -2.747291 | 1.443845  | 0.005999  |
| C  | -3.249296 | -0.620515 | 0.380198  |
| H  | -3.962991 | -0.947550 | -0.379865 |
| H  | -2.704109 | -1.470527 | 0.789917  |
| Cl | -4.194857 | 0.029070  | 1.749617  |

SCF Energy (SMD/wB97XD/6-31+G\*\*) =  
-4341.7295224  
SCF Energy (B3LYP/6-31G\*\*) =  
-4341.79903479

2c\_C004

MMFF Geometry

|    |           |           |           |
|----|-----------|-----------|-----------|
| C  | -0.376391 | 1.062303  | -1.465104 |
| C  | 1.302118  | -0.532438 | -0.366718 |
| C  | -0.749271 | 0.094670  | 0.911222  |
| C  | 0.814320  | -0.059605 | 1.025645  |
| C  | -1.310671 | 0.414942  | -0.468542 |
| C  | 1.052385  | 0.503433  | -1.466300 |
| H  | -1.173457 | -0.878123 | 1.190889  |
| H  | 1.790699  | 1.314204  | -1.412697 |
| H  | -0.769526 | 0.935853  | -2.481016 |
| H  | 0.801845  | -1.472646 | -0.633890 |
| H  | 1.234355  | 0.024428  | -2.438942 |
| Cl | -0.395375 | 2.834772  | -1.219404 |
| Br | 3.204958  | -1.018879 | -0.420990 |
| C  | 1.097928  | -1.129637 | 2.110929  |
| H  | 0.727622  | -2.114308 | 1.803709  |
| H  | 0.607864  | -0.871520 | 3.056783  |
| H  | 2.167213  | -1.227211 | 2.325024  |
| C  | 1.534198  | 1.234388  | 1.477828  |
| H  | 2.622661  | 1.117512  | 1.468482  |
| H  | 1.273712  | 1.501064  | 2.508343  |
| H  | 1.296937  | 2.092963  | 0.849155  |
| Cl | -1.448954 | 1.234450  | 2.107748  |
| C  | -2.552261 | 0.049373  | -0.869620 |
| H  | -2.863932 | 0.285039  | -1.888033 |
| C  | -3.620532 | -0.633878 | -0.070206 |
| H  | -3.430469 | -0.641509 | 1.004225  |
| H  | -4.585554 | -0.146548 | -0.238041 |
| Cl | -3.745345 | -2.320971 | -0.611529 |

SCF Energy (SMD/wB97XD/6-31+G\*\*) =  
-4341.7271592  
SCF Energy (B3LYP/6-31G\*\*) =  
-4341.79558252

2c\_C005

MMFF Geometry

|   |           |           |           |
|---|-----------|-----------|-----------|
| C | -0.192719 | 1.670184  | -0.731008 |
| C | 1.780457  | 0.108020  | -0.468925 |
| C | -0.540551 | -0.784566 | -0.787620 |
| C | 0.853984  | -1.106082 | -0.139191 |
| C | -1.107782 | 0.537532  | -0.254443 |
| C | 1.196553  | 1.480914  | -0.115345 |

|    |           |           |           |
|----|-----------|-----------|-----------|
| H  | -0.376918 | -0.640731 | -1.864042 |
| H  | 1.148145  | 1.606529  | 0.975024  |
| H  | -0.121234 | 1.629786  | -1.824195 |
| H  | 2.008136  | 0.101197  | -1.543071 |
| H  | 1.870770  | 2.266455  | -0.483291 |
| Cl | -0.756013 | 3.326568  | -0.379156 |
| Br | 3.554982  | -0.014436 | 0.367854  |
| C  | 1.449818  | -2.388887 | -0.771155 |
| H  | 1.519220  | -2.295303 | -1.860686 |
| H  | 0.845260  | -3.274198 | -0.548315 |
| H  | 2.453683  | -2.604633 | -0.392131 |
| C  | 0.702216  | -1.344279 | 1.381341  |
| H  | 1.640957  | -1.677676 | 1.835747  |
| H  | -0.034997 | -2.126694 | 1.591396  |
| H  | 0.383577  | -0.442519 | 1.912795  |
| Cl | -1.675045 | -2.158236 | -0.778817 |
| C  | -2.184680 | 0.750062  | 0.540584  |
| H  | -2.436164 | 1.775495  | 0.810766  |
| C  | -3.126234 | -0.192174 | 1.226495  |
| H  | -2.721224 | -1.189797 | 1.395143  |
| H  | -3.370814 | 0.206016  | 2.217204  |
| Cl | -4.640654 | -0.298508 | 0.311994  |

SCF Energy (SMD/wB97XD/6-31+G\*\*) =  
-4341.7282039  
SCF Energy (B3LYP/6-31G\*\*) =  
-4341.79711465

2d\_C001

MMFF Geometry

|    |           |           |           |
|----|-----------|-----------|-----------|
| C  | -0.036514 | 1.611448  | 0.095047  |
| C  | 1.429671  | -0.108122 | -1.092315 |
| C  | -0.447104 | -0.858876 | 0.533615  |
| C  | 0.453727  | -1.244089 | -0.683393 |
| C  | -1.069334 | 0.529066  | 0.403581  |
| C  | 0.774598  | 1.274736  | -1.160004 |
| H  | -1.224130 | -1.625108 | 0.608664  |
| H  | 1.537468  | 2.046475  | -1.329933 |
| H  | 0.633208  | 1.710510  | 0.955054  |
| H  | 1.864544  | -0.334054 | -2.074090 |
| H  | 0.118151  | 1.311593  | -2.039663 |
| Cl | -0.727175 | 3.252222  | -0.118445 |
| Br | 3.033858  | 0.025500  | 0.036318  |
| C  | -0.491854 | -1.493162 | -1.899719 |
| H  | -1.090416 | -0.613671 | -2.155269 |
| H  | -1.191132 | -2.312059 | -1.693431 |
| H  | 0.080839  | -1.770416 | -2.792562 |
| C  | 1.174615  | -2.593703 | -0.456079 |
| H  | 1.765026  | -2.874382 | -1.336156 |

|    |           |           |           |
|----|-----------|-----------|-----------|
| H  | 0.450292  | -3.397100 | -0.276402 |
| H  | 1.852778  | -2.583312 | 0.401154  |
| Cl | 0.369720  | -0.938916 | 2.129311  |
| C  | -2.400915 | 0.741464  | 0.532821  |
| H  | -2.803887 | 1.744742  | 0.407783  |
| C  | -3.464032 | -0.253411 | 0.889269  |
| H  | -3.096290 | -1.059127 | 1.529621  |
| H  | -4.276600 | 0.244371  | 1.427659  |
| Cl | -4.133251 | -0.961134 | -0.592072 |

**SCF Energy (SMD/wB97XD/6-31+G\*\*) =**  
**-4341.7363747**

**SCF Energy (B3LYP/6-31G\*\*) =**  
**-4341.80383709**

**2d\_C002**

**MMFF Geometry**

|    |           |           |           |
|----|-----------|-----------|-----------|
| C  | 0.269041  | 1.854887  | -0.139343 |
| C  | -1.718371 | 0.267031  | 0.066118  |
| C  | 0.472416  | -0.324339 | 1.132504  |
| C  | -0.799021 | -0.938340 | 0.444779  |
| C  | 1.177786  | 0.687704  | 0.224606  |
| C  | -1.029742 | 1.350977  | -0.769683 |
| H  | 0.133656  | 0.217805  | 2.022677  |
| H  | -0.805011 | 0.961016  | -1.771754 |
| H  | 0.751575  | 2.528721  | -0.856049 |
| H  | -2.116287 | 0.721289  | 0.982152  |
| H  | -1.713228 | 2.195653  | -0.930367 |
| Cl | -0.053416 | 2.864835  | 1.299829  |
| Br | -3.344773 | -0.271885 | -0.904261 |
| C  | -1.545097 | -1.858035 | 1.443841  |
| H  | -1.812504 | -1.313030 | 2.356051  |
| H  | -0.940270 | -2.722745 | 1.735750  |
| H  | -2.467316 | -2.264868 | 1.017446  |
| C  | -0.393179 | -1.788450 | -0.782285 |
| H  | -1.256163 | -2.287857 | -1.234292 |
| H  | 0.308377  | -2.582382 | -0.504261 |
| H  | 0.085802  | -1.189749 | -1.562723 |
| Cl | 1.558693  | -1.549838 | 1.852020  |
| C  | 2.416408  | 0.660783  | -0.324073 |
| H  | 2.710694  | 1.524902  | -0.923397 |
| C  | 3.470801  | -0.405332 | -0.278607 |
| H  | 4.086457  | -0.311157 | 0.619093  |
| H  | 3.051309  | -1.408464 | -0.362188 |
| Cl | 4.560824  | -0.232319 | -1.683974 |

**SCF Energy (SMD/wB97XD/6-31+G\*\*) =**  
**-4341.7326329**

**SCF Energy (B3LYP/6-31G\*\*) =**  
**-4341.80316049**

**2d\_C003**

**MMFF Geometry**

|    |           |           |           |
|----|-----------|-----------|-----------|
| C  | 0.105208  | 1.560032  | -0.137664 |
| C  | -1.756877 | 0.143871  | 0.897247  |
| C  | 0.470709  | -0.937611 | 0.130129  |
| C  | -0.772502 | -1.045907 | 1.068519  |
| C  | 1.110421  | 0.447978  | 0.160943  |
| C  | -1.072376 | 1.513756  | 0.843176  |
| H  | 1.184332  | -1.704250 | 0.442458  |
| H  | -1.802898 | 2.292749  | 0.586387  |
| H  | -0.257084 | 1.449357  | -1.164245 |
| H  | -2.472792 | 0.147868  | 1.728876  |
| H  | -0.716148 | 1.766345  | 1.851090  |
| Cl | 0.795558  | 3.214237  | -0.081470 |
| Br | -2.951347 | -0.007200 | -0.656241 |
| C  | -0.248871 | -1.000650 | 2.537956  |
| H  | 0.286561  | -0.074252 | 2.766813  |
| H  | 0.441091  | -1.829703 | 2.735371  |
| H  | -1.075957 | -1.085652 | 3.252585  |
| C  | -1.470363 | -2.419816 | 0.935115  |
| H  | -2.314542 | -2.498367 | 1.630143  |
| H  | -0.774880 | -3.234536 | 1.169445  |
| H  | -1.855806 | -2.613987 | -0.069178 |
| Cl | 0.150192  | -1.360353 | -1.584315 |
| C  | 2.426214  | 0.641361  | 0.418989  |
| H  | 2.835984  | 1.649743  | 0.399453  |
| C  | 3.471744  | -0.379719 | 0.752370  |
| H  | 4.222788  | 0.062172  | 1.414886  |
| H  | 3.068709  | -1.256044 | 1.264939  |
| Cl | 4.286481  | -0.910308 | -0.727231 |

**SCF Energy (SMD/wB97XD/6-31+G\*\*) =**  
**-4341.7352096**

**SCF Energy (B3LYP/6-31G\*\*) =**  
**-4341.80161006**

**2d\_C004**

**MMFF Geometry**

|   |           |           |           |
|---|-----------|-----------|-----------|
| C | 0.224285  | 0.224285  | 0.224285  |
| C | -1.730732 | -1.730732 | -1.730732 |
| C | 0.617225  | 0.617225  | 0.617225  |
| C | -0.798738 | -0.798738 | -0.798738 |
| C | 1.150481  | 1.150481  | 1.150481  |
| C | -1.196238 | -1.196238 | -1.196238 |
| H | 0.500678  | 0.500678  | 0.500678  |
| H | -1.204915 | -1.204915 | -1.204915 |
| H | 0.565689  | 0.565689  | 0.565689  |
| H | -1.904913 | -1.904913 | -1.904913 |
| H | -1.865341 | -1.865341 | -1.865341 |



|    |           |           |           |
|----|-----------|-----------|-----------|
| Cl | 0.251213  | 0.251213  | 0.251213  |
| Br | -3.547500 | -3.547500 | -3.547500 |
| C  | -1.350231 | -1.350231 | -1.350231 |
| H  | -1.390506 | -1.390506 | -1.390506 |
| H  | -0.735073 | -0.735073 | -0.735073 |
| H  | -2.359390 | -2.359390 | -2.359390 |
| C  | -0.700641 | -0.700641 | -0.700641 |
| H  | -1.660626 | -1.660626 | -1.660626 |
| H  | 0.009035  | 0.009035  | 0.009035  |
| H  | -0.373429 | -0.373429 | -0.373429 |
| Cl | 1.769143  | 1.769143  | 1.769143  |
| C  | 2.247360  | 2.247360  | 2.247360  |
| H  | 2.424461  | 2.424461  | 2.424461  |
| C  | 3.301345  | 3.301345  | 3.301345  |
| H  | 2.983240  | 2.983240  | 2.983240  |
| H  | 3.592577  | 3.592577  | 3.592577  |
| Cl | 4.744134  | 4.744134  | 4.744134  |

**SCF Energy (SMD/wB97XD/6-31+G\*\*) =**  
**-4341.7310354**  
**SCF Energy (B3LYP/6-31G\*\*) =**  
**-4341.80068211**

**2e\_C001**

**MMFF Geometry**

|    |           |           |           |
|----|-----------|-----------|-----------|
| C  | -0.410991 | 1.712447  | 0.504914  |
| C  | 1.571747  | 0.161761  | 0.272770  |
| C  | -0.692038 | -0.789765 | 0.882016  |
| C  | 0.656858  | -1.083756 | 0.141778  |
| C  | -1.352495 | 0.510563  | 0.426862  |
| C  | 0.914165  | 1.453762  | -0.215142 |
| H  | -1.352225 | -1.646797 | 0.722215  |
| H  | 1.594089  | 2.298214  | -0.036206 |
| H  | -0.204645 | 1.921733  | 1.560298  |
| H  | 1.882581  | 0.292906  | 1.316292  |
| H  | 0.758027  | 1.419971  | -1.301564 |
| Cl | -1.099775 | 3.238828  | -0.128720 |
| Br | 3.282067  | -0.036654 | -0.676647 |
| C  | 0.322645  | -1.422102 | -1.335376 |
| H  | -0.147454 | -0.586979 | -1.862759 |
| H  | -0.370304 | -2.270357 | -1.388551 |
| H  | 1.213057  | -1.710684 | -1.902875 |
| C  | 1.332343  | -2.336982 | 0.748865  |
| H  | 2.158993  | -2.695762 | 0.126215  |
| H  | 0.617635  | -3.163638 | 0.835542  |
| H  | 1.741588  | -2.140440 | 1.745259  |
| Cl | -0.515885 | -0.701086 | 2.673429  |
| C  | -2.633931 | 0.559000  | -0.009032 |
| H  | -3.055564 | 1.504854  | -0.344464 |

|    |           |           |           |
|----|-----------|-----------|-----------|
| C  | -3.636041 | -0.554604 | -0.061596 |
| H  | -3.478661 | -1.306581 | 0.715624  |
| H  | -4.645921 | -0.154844 | 0.073735  |
| Cl | -3.561817 | -1.346016 | -1.645442 |

**SCF Energy (SMD/wB97XD/6-31+G\*\*) =**  
**-4341.7394351**  
**SCF Energy (B3LYP/6-31G\*\*) =**  
**-4341.80826546**

**2e\_C002**

**MMFF Geometry**

|    |           |           |           |
|----|-----------|-----------|-----------|
| C  | -0.376160 | 1.548728  | 0.603015  |
| C  | 1.630766  | 0.016095  | 0.369876  |
| C  | -0.702473 | -0.942168 | 0.210143  |
| C  | 0.772547  | -1.097031 | -0.289031 |
| C  | -1.252276 | 0.463726  | -0.023736 |
| C  | 1.081047  | 1.427029  | 0.146432  |
| H  | -1.314522 | -1.698527 | -0.287877 |
| H  | 1.695707  | 2.148657  | 0.702211  |
| H  | -0.419431 | 1.453986  | 1.693154  |
| H  | 1.719500  | -0.163678 | 1.447999  |
| H  | 1.171906  | 1.708849  | -0.911252 |
| Cl | -0.917826 | 3.223294  | 0.270546  |
| Br | 3.501465  | -0.000590 | -0.237403 |
| C  | 0.760933  | -1.003117 | -1.838060 |
| H  | 0.431956  | -0.024035 | -2.198430 |
| H  | 0.080081  | -1.750005 | -2.264099 |
| H  | 1.748412  | -1.197252 | -2.268822 |
| C  | 1.309973  | -2.502153 | 0.074080  |
| H  | 2.254466  | -2.720874 | -0.435651 |
| H  | 0.599453  | -3.281877 | -0.223987 |
| H  | 1.492584  | -2.606917 | 1.148573  |
| Cl | -0.897750 | -1.323003 | 1.961446  |
| C  | -2.398896 | 0.693605  | -0.707057 |
| H  | -2.764455 | 1.712886  | -0.819218 |
| C  | -3.293682 | -0.301612 | -1.382126 |
| H  | -3.798843 | 0.168932  | -2.231571 |
| H  | -2.751363 | -1.167315 | -1.769974 |
| Cl | -4.530741 | -0.863868 | -0.246884 |

**SCF Energy (SMD/wB97XD/6-31+G\*\*) =**  
**-4341.7384930**  
**SCF Energy (B3LYP/6-31G\*\*) =**  
**-4341.80695235**

**2e\_C003**

**MMFF Geometry**

|   |           |           |          |
|---|-----------|-----------|----------|
| C | 0.039362  | -1.683345 | 0.379538 |
| C | -1.577574 | 0.226050  | 1.102308 |

|    |           |           |           |
|----|-----------|-----------|-----------|
| C  | 0.221899  | 0.620407  | -0.647028 |
| C  | -0.599818 | 1.283542  | 0.502246  |
| C  | 0.982432  | -0.608499 | -0.143594 |
| C  | -0.935166 | -1.129992 | 1.430604  |
| H  | -0.476669 | 0.282394  | -1.419394 |
| H  | -0.363749 | -0.998517 | 2.360276  |
| H  | 0.602304  | -2.489837 | 0.863725  |
| H  | -2.027648 | 0.625515  | 2.020037  |
| H  | -1.698127 | -1.881956 | 1.670309  |
| Cl | -0.783963 | -2.487020 | -0.984321 |
| Br | -3.168404 | -0.083834 | -0.019322 |
| C  | -1.363116 | 2.539527  | 0.012074  |
| H  | -1.891719 | 2.359288  | -0.929539 |
| H  | -0.686650 | 3.384349  | -0.160736 |
| H  | -2.094692 | 2.870600  | 0.758359  |
| C  | 0.337855  | 1.772792  | 1.640569  |
| H  | -0.242094 | 2.240123  | 2.445357  |
| H  | 1.053150  | 2.520487  | 1.281073  |
| H  | 0.914679  | 0.959824  | 2.091396  |
| Cl | 1.227789  | 1.790723  | -1.551447 |
| C  | 2.314571  | -0.838896 | -0.047486 |
| H  | 2.620795  | -1.821537 | 0.317536  |
| C  | 3.477162  | 0.064349  | -0.334119 |
| H  | 3.761584  | 0.016823  | -1.387968 |
| H  | 3.292302  | 1.093331  | -0.024862 |
| Cl | 4.894116  | -0.462661 | 0.619299  |

**SCF Energy (SMD/wB97XD/6-31+G\*\*) =**  
**-4341.7293553**

**SCF Energy (B3LYP/6-31G\*\*) =**  
**-4341.79722294**

**2f\_C001**

**MMFF Geometry**

|    |           |           |           |
|----|-----------|-----------|-----------|
| C  | 0.813975  | -0.958007 | -0.547471 |
| C  | -1.296763 | 0.427322  | -1.155658 |
| C  | 0.098192  | 1.043454  | 0.928755  |
| C  | -0.821013 | 1.564414  | -0.215455 |
| C  | 1.204804  | 0.113678  | 0.450285  |
| C  | -0.173283 | -0.498773 | -1.627438 |
| H  | 0.552505  | 1.922569  | 1.403545  |
| H  | -0.575962 | -1.364997 | -2.168824 |
| H  | 1.700251  | -1.305696 | -1.087721 |
| H  | -1.756262 | 0.874451  | -2.046970 |
| H  | 0.407862  | 0.052146  | -2.380144 |
| Cl | 0.240252  | -2.412914 | 0.313081  |
| Br | -2.784075 | -0.643354 | -0.464418 |
| C  | 0.025023  | 2.555999  | -1.074707 |
| H  | 0.920648  | 2.090785  | -1.497659 |

|    |           |           |           |
|----|-----------|-----------|-----------|
| H  | 0.360019  | 3.409897  | -0.473806 |
| H  | -0.563871 | 2.954300  | -1.909260 |
| C  | -1.994808 | 2.412039  | 0.330100  |
| H  | -2.600888 | 2.813548  | -0.490525 |
| H  | -1.623132 | 3.264213  | 0.911485  |
| H  | -2.666373 | 1.851536  | 0.985635  |
| Cl | -0.765320 | 0.255252  | 2.285507  |
| C  | 2.476018  | 0.310244  | 0.872179  |
| H  | 2.677583  | 1.122608  | 1.570744  |
| C  | 3.688026  | -0.504297 | 0.539003  |
| H  | 3.449508  | -1.527683 | 0.239454  |
| H  | 4.352957  | -0.560486 | 1.406249  |
| Cl | 4.565466  | 0.282588  | -0.787124 |

**SCF Energy (SMD/wB97XD/6-31+G\*\*) =**  
**-4341.7314777**

**SCF Energy (B3LYP/6-31G\*\*) =**  
**-4341.79578246**

**2f\_C002**

**MMFF Geometry**

|    |           |           |           |
|----|-----------|-----------|-----------|
| C  | 0.640319  | -0.812105 | -1.002370 |
| C  | -1.724014 | 0.264633  | -1.020928 |
| C  | 0.121144  | 1.217855  | 0.513891  |
| C  | -1.153390 | 1.527479  | -0.326272 |
| C  | 1.158391  | 0.383656  | -0.229184 |
| C  | -0.671450 | -0.565919 | -1.758936 |
| H  | 0.569037  | 2.181761  | 0.787570  |
| H  | -1.093151 | -1.517047 | -2.109922 |
| H  | 1.367223  | -1.101708 | -1.767570 |
| H  | -2.477672 | 0.576028  | -1.756165 |
| H  | -0.414283 | -0.021708 | -2.678481 |
| Cl | 0.543362  | -2.240584 | 0.060423  |
| Br | -2.789525 | -0.902209 | 0.135398  |
| C  | -0.737105 | 2.529282  | -1.448810 |
| H  | 0.050058  | 2.133564  | -2.097772 |
| H  | -0.359664 | 3.465374  | -1.020186 |
| H  | -1.592150 | 2.782866  | -2.086406 |
| C  | -2.220757 | 2.280628  | 0.502995  |
| H  | -3.087950 | 2.536440  | -0.117097 |
| H  | -1.814540 | 3.217581  | 0.902323  |
| H  | -2.590313 | 1.707355  | 1.357202  |
| Cl | -0.198328 | 0.456727  | 2.102887  |
| C  | 2.459528  | 0.758801  | -0.204305 |
| H  | 2.726795  | 1.653772  | 0.359882  |
| C  | 3.635874  | 0.065969  | -0.825323 |
| H  | 4.018471  | 0.656515  | -1.662394 |
| H  | 3.414261  | -0.942939 | -1.176468 |
| Cl | 4.941202  | -0.078038 | 0.373279  |

SCF Energy (SMD/wB97XD/6-31+G\*\*) =  
-4341.7305053  
SCF Energy (B3LYP/6-31G\*\*) =  
-4341.79420759

2f\_C003

MMFF Geometry

|    |           |           |           |
|----|-----------|-----------|-----------|
| C  | 0.483475  | -1.189988 | -1.151098 |
| C  | -1.752373 | -0.309384 | -0.400567 |
| C  | 0.127660  | 1.258417  | -0.982120 |
| C  | -1.161642 | 1.104287  | -0.092233 |
| C  | 1.124729  | 0.116570  | -0.700946 |
| C  | -0.750187 | -1.466614 | -0.291703 |
| H  | -0.169660 | 1.179077  | -2.035886 |
| H  | -0.458347 | -1.631479 | 0.754187  |
| H  | 0.168227  | -1.068778 | -2.194555 |
| H  | -2.161423 | -0.308149 | -1.419637 |
| H  | -1.232873 | -2.395131 | -0.625829 |
| Cl | 1.525172  | -2.624449 | -1.200220 |
| Br | -3.310400 | -0.767733 | 0.705631  |
| C  | -2.196664 | 2.188813  | -0.480835 |
| H  | -2.437296 | 2.138125  | -1.548620 |
| H  | -1.831363 | 3.198748  | -0.267897 |
| H  | -3.132774 | 2.080330  | 0.075871  |
| C  | -0.816322 | 1.281818  | 1.406045  |
| H  | -1.714243 | 1.280152  | 2.032575  |
| H  | -0.317296 | 2.238478  | 1.593244  |
| H  | -0.157523 | 0.490530  | 1.776189  |
| Cl | 0.853273  | 2.896983  | -0.903426 |
| C  | 2.323803  | 0.310286  | -0.098515 |
| H  | 2.613478  | 1.330939  | 0.148332  |
| C  | 3.342323  | -0.692820 | 0.360019  |
| H  | 3.978563  | -1.012828 | -0.468587 |
| H  | 2.881721  | -1.549009 | 0.854681  |
| Cl | 4.414848  | 0.038721  | 1.587209  |

SCF Energy (SMD/wB97XD/6-31+G\*\*) =  
-4341.7280242  
SCF Energy (B3LYP/6-31G\*\*) =  
-4341.79813792

2f\_C004

MMFF Geometry

|   |           |           |           |
|---|-----------|-----------|-----------|
| C | 0.826401  | -0.712838 | -1.310339 |
| C | -1.547196 | -0.346252 | -0.535007 |
| C | 0.053491  | 1.575559  | -0.742555 |
| C | -1.207267 | 1.063014  | 0.044669  |
| C | 1.228909  | 0.584105  | -0.617448 |
| C | -0.368827 | -1.326647 | -0.576645 |

|    |           |           |           |
|----|-----------|-----------|-----------|
| H  | -0.207137 | 1.634369  | -1.807431 |
| H  | -0.079020 | -1.627435 | 0.439211  |
| H  | 0.524737  | -0.466349 | -2.335540 |
| H  | -1.927433 | -0.227257 | -1.558277 |
| H  | -0.683898 | -2.245756 | -1.089555 |
| Cl | 2.076384  | -1.947992 | -1.529070 |
| Br | -3.032638 | -1.238450 | 0.391776  |
| C  | -2.400478 | 2.020082  | -0.198155 |
| H  | -2.609355 | 2.124746  | -1.268701 |
| H  | -2.212014 | 3.020326  | 0.205290  |
| H  | -3.315936 | 1.665074  | 0.285464  |
| C  | -0.923885 | 1.021615  | 1.565289  |
| H  | -1.820947 | 0.765236  | 2.138353  |
| H  | -0.592231 | 1.996188  | 1.938852  |
| H  | -0.151200 | 0.291427  | 1.823635  |
| Cl | 0.491224  | 3.274358  | -0.358918 |
| C  | 2.354227  | 0.870073  | 0.082181  |
| H  | 2.431294  | 1.846576  | 0.559745  |
| C  | 3.575591  | 0.061656  | 0.394567  |
| H  | 4.386694  | 0.735022  | 0.692327  |
| H  | 3.957246  | -0.513136 | -0.449155 |
| Cl | 3.249788  | -1.003747 | 1.774710  |

SCF Energy (SMD/wB97XD/6-31+G\*\*) =  
-4341.7268102  
SCF Energy (B3LYP/6-31G\*\*) =  
-4341.79611724

2g\_C001

MMFF Geometry

|    |           |           |           |
|----|-----------|-----------|-----------|
| C  | -0.881135 | -1.047498 | 0.924189  |
| C  | 1.486211  | -0.305041 | 0.346961  |
| C  | -0.331899 | 1.409412  | 0.556695  |
| C  | 0.991998  | 1.062916  | -0.216160 |
| C  | -1.387191 | 0.299629  | 0.439344  |
| C  | 0.445484  | -1.423602 | 0.266158  |
| H  | -0.086322 | 1.517048  | 1.619863  |
| H  | 0.256412  | -1.683629 | -0.784063 |
| H  | -1.588151 | -1.853616 | 0.714242  |
| H  | 1.799745  | -0.177772 | 1.390547  |
| H  | 0.837877  | -2.339881 | 0.727760  |
| Cl | -0.731615 | -1.018425 | 2.707913  |
| Br | 3.121838  | -0.965180 | -0.528150 |
| C  | 2.058319  | 2.151545  | 0.064210  |
| H  | 2.251819  | 2.244835  | 1.138704  |
| H  | 1.749327  | 3.134533  | -0.305647 |
| H  | 3.010653  | 1.930065  | -0.427524 |
| C  | 0.736997  | 1.017914  | -1.742187 |
| H  | 1.654501  | 0.811821  | -2.302386 |

|    |           |           |           |
|----|-----------|-----------|-----------|
| H  | 0.363112  | 1.977314  | -2.115424 |
| H  | 0.003760  | 0.254491  | -2.018764 |
| Cl | -0.974844 | 3.036985  | 0.133594  |
| C  | -2.627189 | 0.454625  | -0.083226 |
| H  | -2.940330 | 1.425670  | -0.461786 |
| C  | -3.709200 | -0.575610 | -0.205015 |
| H  | -4.690658 | -0.091323 | -0.205292 |
| H  | -3.700970 | -1.295900 | 0.617337  |
| Cl | -3.521744 | -1.450211 | -1.736102 |

**SCF Energy (SMD/wB97XD/6-31+G\*\*) =**  
**-4341.7379534**

**SCF Energy (B3LYP/6-31G\*\*) =**  
**-4341.80804344**

**2g\_C002**

**MMFF Geometry**

|    |           |           |           |
|----|-----------|-----------|-----------|
| C  | -0.851870 | -1.229433 | 0.085201  |
| C  | 1.564756  | -0.452862 | 0.266459  |
| C  | -0.299876 | 1.197384  | 0.605628  |
| C  | 1.170113  | 1.043170  | 0.065908  |
| C  | -1.272767 | 0.220916  | -0.075019 |
| C  | 0.589455  | -1.445256 | -0.371655 |
| H  | -0.296120 | 0.970085  | 1.677987  |
| H  | 0.630094  | -1.361190 | -1.465938 |
| H  | -1.487782 | -1.910643 | -0.483956 |
| H  | 1.650021  | -0.666831 | 1.338984  |
| H  | 0.896344  | -2.475469 | -0.145556 |
| Cl | -1.062267 | -1.732988 | 1.791064  |
| Br | 3.361855  | -0.884820 | -0.413739 |
| C  | 2.123970  | 1.941893  | 0.892529  |
| H  | 2.075178  | 1.691090  | 1.958081  |
| H  | 1.881065  | 3.004291  | 0.788562  |
| H  | 3.165698  | 1.837672  | 0.573535  |
| C  | 1.255932  | 1.482471  | -1.416338 |
| H  | 2.278268  | 1.418115  | -1.802009 |
| H  | 0.950210  | 2.526177  | -1.545262 |
| H  | 0.619493  | 0.875182  | -2.066785 |
| Cl | -0.869690 | 2.904979  | 0.561253  |
| C  | -2.387386 | 0.579863  | -0.756441 |
| H  | -2.658292 | 1.631080  | -0.835193 |
| C  | -3.362945 | -0.302620 | -1.475743 |
| H  | -2.896283 | -1.192100 | -1.905690 |
| H  | -3.824681 | 0.249038  | -2.300794 |
| Cl | -4.645950 | -0.809694 | -0.365746 |

**SCF Energy (SMD/wB97XD/6-31+G\*\*) =**  
**-4341.7365611**

**SCF Energy (B3LYP/6-31G\*\*) =**  
**-4341.80593190**

**2g\_C003**

**MMFF Geometry**

|    |           |           |           |
|----|-----------|-----------|-----------|
| C  | -0.376593 | 1.209902  | 0.121398  |
| C  | 1.617495  | 0.142432  | -1.068317 |
| C  | 0.016670  | -1.275923 | 0.396893  |
| C  | 1.048880  | -1.273487 | -0.775283 |
| C  | -1.027342 | -0.161789 | 0.261658  |
| C  | 0.554624  | 1.247811  | -1.096139 |
| H  | -0.477187 | -2.255471 | 0.399534  |
| H  | 1.036937  | 2.231886  | -1.169737 |
| H  | 0.199584  | 1.415577  | 1.028475  |
| H  | 2.136250  | 0.136296  | -2.035212 |
| H  | -0.041265 | 1.142467  | -2.012737 |
| Cl | -1.493913 | 2.593705  | 0.012523  |
| Br | 3.053373  | 0.704210  | 0.152502  |
| C  | 0.294028  | -1.736237 | -2.060623 |
| H  | -0.535086 | -1.072928 | -2.324947 |
| H  | -0.124250 | -2.741485 | -1.931045 |
| H  | 0.971079  | -1.772127 | -2.922246 |
| C  | 2.157526  | -2.330362 | -0.561163 |
| H  | 2.851108  | -2.346726 | -1.410014 |
| H  | 1.726238  | -3.334366 | -0.469795 |
| H  | 2.750383  | -2.159232 | 0.341124  |
| Cl | 0.737242  | -1.173015 | 2.036110  |
| C  | -2.334979 | -0.518152 | 0.261000  |
| H  | -2.556350 | -1.578061 | 0.400214  |
| C  | -3.562457 | 0.327768  | 0.095796  |
| H  | -3.515397 | 0.935868  | -0.809381 |
| H  | -3.739344 | 0.946121  | 0.978931  |
| Cl | -5.000849 | -0.714040 | -0.098755 |

**SCF Energy (SMD/wB97XD/6-31+G\*\*) =**  
**-4341.7299126**

**SCF Energy (B3LYP/6-31G\*\*) =**  
**-4341.79848703**

**2g\_C004**

**MMFF Geometry**

|   |           |           |           |
|---|-----------|-----------|-----------|
| C | 0.584824  | -1.035136 | 0.312475  |
| C | -1.377707 | -0.218268 | -1.115176 |
| C | -0.187536 | 1.366003  | 0.549342  |
| C | -1.048314 | 1.252690  | -0.747164 |
| C | 1.011311  | 0.409013  | 0.559011  |
| C | -0.178020 | -1.165282 | -1.013056 |
| H | 0.160174  | 2.404013  | 0.621204  |
| H | -0.507386 | -2.203572 | -1.155586 |
| H | -0.060663 | -1.350373 | 1.137955  |
| H | -1.767413 | -0.261512 | -2.140025 |
| H | 0.506327  | -0.957556 | -1.846825 |

|    |           |           |           |
|----|-----------|-----------|-----------|
| Cl | 1.885458  | -2.250212 | 0.300024  |
| Br | -2.863546 | -0.996370 | -0.088872 |
| C  | -0.201956 | 1.839720  | -1.919707 |
| H  | 0.738913  | 1.302180  | -2.071725 |
| H  | 0.052338  | 2.890047  | -1.734116 |
| H  | -0.757812 | 1.799520  | -2.863872 |
| C  | -2.308102 | 2.147032  | -0.676696 |
| H  | -2.880903 | 2.089383  | -1.609678 |
| H  | -2.032335 | 3.197386  | -0.524769 |
| H  | -2.984917 | 1.878242  | 0.138513  |
| Cl | -1.094161 | 1.133681  | 2.080836  |
| C  | 2.238337  | 0.954294  | 0.741674  |
| H  | 2.287742  | 2.036366  | 0.881815  |
| C  | 3.608535  | 0.356818  | 0.810918  |
| H  | 3.648662  | -0.630345 | 1.269559  |
| H  | 4.250777  | 1.000187  | 1.421998  |
| Cl | 4.310019  | 0.306982  | -0.817544 |

**SCF Energy (SMD/wB97XD/6-31+G\*\*) =**  
**-4341.7290073**

**SCF Energy (B3LYP/6-31G\*\*) =**  
**-4341.79684924**

**2h\_C001**

**MMFF Geometry**

|    |           |           |           |
|----|-----------|-----------|-----------|
| C  | 0.643189  | -1.308575 | 0.001997  |
| C  | -1.367996 | -0.105534 | 1.129649  |
| C  | -0.027000 | 1.043303  | -0.698060 |
| C  | -0.835987 | 1.265383  | 0.618547  |
| C  | 1.119268  | 0.043168  | -0.498814 |
| C  | -0.305490 | -1.208038 | 1.204898  |
| H  | -0.695110 | 0.635692  | -1.464333 |
| H  | 0.315620  | -0.999186 | 2.087227  |
| H  | 1.481921  | -1.929164 | 0.328459  |
| H  | -1.803749 | 0.021371  | 2.128867  |
| H  | -0.764008 | -2.184854 | 1.406903  |
| Cl | -0.064142 | -2.218825 | -1.363244 |
| Br | -2.910746 | -0.771783 | 0.102561  |
| C  | -1.995818 | 2.272057  | 0.412666  |
| H  | -2.574569 | 2.054293  | -0.490746 |
| H  | -1.629991 | 3.300384  | 0.314335  |
| H  | -2.680421 | 2.262669  | 1.268810  |
| C  | 0.066014  | 1.872845  | 1.729569  |
| H  | -0.499341 | 1.998743  | 2.660683  |
| H  | 0.446131  | 2.860986  | 1.448905  |
| H  | 0.932085  | 1.245356  | 1.960069  |
| Cl | 0.514813  | 2.599542  | -1.424482 |
| C  | 2.432773  | 0.315062  | -0.690089 |
| H  | 2.741856  | 1.308080  | -1.010218 |

|    |          |           |           |
|----|----------|-----------|-----------|
| C  | 3.595913 | -0.618985 | -0.543141 |
| H  | 4.409709 | -0.313104 | -1.207921 |
| H  | 3.343263 | -1.653335 | -0.790679 |
| Cl | 4.190712 | -0.558342 | 1.126941  |

**SCF Energy (SMD/wB97XD/6-31+G\*\*) =**  
**-4341.7349228**

**SCF Energy (B3LYP/6-31G\*\*) =**  
**-4341.80265948**

**2h\_C002**

**MMFF Geometry**

|    |           |           |           |
|----|-----------|-----------|-----------|
| C  | 0.597679  | -0.945754 | 0.968367  |
| C  | -1.719254 | -0.150981 | 0.301422  |
| C  | 0.225090  | 1.455935  | 0.227051  |
| C  | -1.143263 | 1.086518  | -0.434088 |
| C  | 1.201269  | 0.273205  | 0.275094  |
| C  | -0.751740 | -1.335251 | 0.353286  |
| H  | 0.661794  | 2.292903  | -0.331243 |
| H  | -1.201601 | -2.142017 | 0.948762  |
| H  | 0.443564  | -0.700941 | 2.024719  |
| H  | -2.006684 | 0.117680  | 1.325050  |
| H  | -0.603293 | -1.752746 | -0.651735 |
| Cl | 1.616347  | -2.407503 | 0.998591  |
| Br | -3.407286 | -0.789586 | -0.479349 |
| C  | -0.885498 | 0.818371  | -1.940736 |
| H  | -0.233739 | -0.043767 | -2.109948 |
| H  | -0.403394 | 1.684927  | -2.409299 |
| H  | -1.814920 | 0.641128  | -2.491318 |
| C  | -2.115040 | 2.287720  | -0.348801 |
| H  | -3.000003 | 2.140637  | -0.977262 |
| H  | -1.629919 | 3.208639  | -0.692620 |
| H  | -2.470578 | 2.456479  | 0.672965  |
| Cl | 0.055833  | 2.094003  | 1.904333  |
| C  | 2.424119  | 0.446536  | -0.283309 |
| H  | 2.628654  | 1.421922  | -0.728809 |
| C  | 3.582694  | -0.502344 | -0.372264 |
| H  | 3.345611  | -1.359886 | -1.005876 |
| H  | 3.916151  | -0.821726 | 0.617449  |
| Cl | 4.982351  | 0.306943  | -1.131733 |

**SCF Energy (SMD/wB97XD/6-31+G\*\*) =**  
**-4341.7331267**

**SCF Energy (B3LYP/6-31G\*\*) =**  
**-4341.80352507**

**2h\_C003**

**MMFF Geometry**

|   |           |           |           |
|---|-----------|-----------|-----------|
| C | -0.820239 | -0.274246 | -1.238067 |
| C | 1.567788  | -0.147493 | -0.382695 |

|    |           |           |           |
|----|-----------|-----------|-----------|
| C  | -0.074282 | 1.669689  | 0.215920  |
| C  | 1.179198  | 0.877949  | 0.712020  |
| C  | -1.239212 | 0.756820  | -0.192324 |
| C  | 0.415713  | -1.066067 | -0.792087 |
| H  | -0.383937 | 2.354229  | 1.015004  |
| H  | 0.747834  | -1.713109 | -1.616126 |
| H  | -0.577691 | 0.257448  | -2.164452 |
| H  | 1.940434  | 0.373027  | -1.273100 |
| H  | 0.154104  | -1.743122 | 0.032315  |
| Cl | -2.058136 | -1.456429 | -1.722235 |
| Br | 3.088096  | -1.282274 | 0.134230  |
| C  | 0.811049  | 0.201802  | 2.059486  |
| H  | 0.012975  | -0.539125 | 1.955364  |
| H  | 0.465234  | 0.949294  | 2.783754  |
| H  | 1.670018  | -0.301696 | 2.514490  |
| C  | 2.344138  | 1.854932  | 0.999907  |
| H  | 3.161532  | 1.365559  | 1.540406  |
| H  | 2.007786  | 2.692490  | 1.622010  |
| H  | 2.769364  | 2.269273  | 0.079900  |
| Cl | 0.275699  | 2.762691  | -1.174792 |
| C  | -2.429817 | 0.965251  | 0.419991  |
| H  | -2.476576 | 1.765808  | 1.161680  |
| C  | -3.769834 | 0.315480  | 0.271468  |
| H  | -3.985640 | -0.052815 | -0.730586 |
| H  | -4.551267 | 1.048696  | 0.498586  |
| Cl | -3.920184 | -0.998678 | 1.452380  |

**SCF Energy (SMD/wB97XD/6-31+G\*\*) =**  
**-4341.7323331**  
**SCF Energy (B3LYP/6-31G\*\*) =**  
**-4341.80180178**

**2h\_C004**

**MMFF Geometry**

|    |           |           |           |
|----|-----------|-----------|-----------|
| C  | 0.672159  | -1.084007 | 0.652431  |
| C  | -1.714978 | -0.111437 | 0.992014  |
| C  | -0.028534 | 1.065603  | -0.507196 |
| C  | -1.225213 | 1.273488  | 0.476111  |
| C  | 1.114718  | 0.279890  | 0.154010  |
| C  | -0.597928 | -1.024045 | 1.512608  |
| H  | -0.372699 | 0.493827  | -1.375595 |
| H  | -0.300606 | -0.642852 | 2.499552  |
| H  | 1.440790  | -1.554065 | 1.269302  |
| H  | -2.441149 | 0.037388  | 1.801383  |
| H  | -0.973720 | -2.038011 | 1.702059  |
| Cl | 0.507046  | -2.193972 | -0.738367 |
| Br | -2.790888 | -1.098348 | -0.328482 |
| C  | -2.380972 | 2.061494  | -0.190839 |
| H  | -2.622174 | 1.674443  | -1.186116 |

|    |           |           |           |
|----|-----------|-----------|-----------|
| H  | -2.133193 | 3.121771  | -0.314716 |
| H  | -3.288868 | 2.021059  | 0.422237  |
| C  | -0.791005 | 2.114200  | 1.710206  |
| H  | -1.625883 | 2.231186  | 2.411488  |
| H  | -0.470052 | 3.121414  | 1.423627  |
| H  | 0.033813  | 1.655585  | 2.263672  |
| Cl | 0.511552  | 2.622874  | -1.233716 |
| C  | 2.385983  | 0.728838  | 0.292986  |
| H  | 2.656164  | 1.709410  | -0.095041 |
| C  | 3.557696  | 0.050429  | 0.937157  |
| H  | 3.275474  | -0.684661 | 1.693062  |
| H  | 4.188542  | 0.794995  | 1.433084  |
| Cl | 4.532171  | -0.759845 | -0.300155 |

**SCF Energy (SMD/wB97XD/6-31+G\*\*) =**  
**-4341.7333603**  
**SCF Energy (B3LYP/6-31G\*\*) =**  
**-4341.80016246**

**2h\_C005**

**MMFF Geometry**

|    |           |           |           |
|----|-----------|-----------|-----------|
| C  | -0.795388 | -0.797904 | -0.697823 |
| C  | 1.641018  | -0.168585 | -0.387012 |
| C  | -0.167920 | 1.525059  | 0.101227  |
| C  | 1.269863  | 1.050462  | 0.497074  |
| C  | -1.201432 | 0.391367  | 0.168424  |
| C  | 0.608549  | -1.297607 | -0.338491 |
| H  | -0.453502 | 2.345260  | 0.771086  |
| H  | 0.905459  | -2.086283 | -1.043913 |
| H  | -0.790290 | -0.473757 | -1.743906 |
| H  | 1.771706  | 0.147568  | -1.428996 |
| H  | 0.600267  | -1.769821 | 0.653067  |
| Cl | -1.891499 | -2.196808 | -0.690302 |
| Br | 3.393070  | -0.938262 | 0.065901  |
| C  | 1.256494  | 0.706176  | 2.010440  |
| H  | 0.598793  | -0.135855 | 2.245206  |
| H  | 0.906623  | 1.563819  | 2.597726  |
| H  | 2.254964  | 0.457407  | 2.384059  |
| C  | 2.281684  | 2.205507  | 0.305803  |
| H  | 3.250627  | 1.977633  | 0.762941  |
| H  | 1.917044  | 3.126740  | 0.774841  |
| H  | 2.467336  | 2.417681  | -0.752216 |
| Cl | -0.249246 | 2.260464  | -1.540738 |
| C  | -2.291016 | 0.590340  | 0.948945  |
| H  | -2.370473 | 1.553487  | 1.458038  |
| C  | -3.468243 | -0.273070 | 1.280312  |
| H  | -3.846545 | 0.003568  | 2.270444  |
| H  | -3.245507 | -1.337944 | 1.332974  |
| Cl | -4.772527 | 0.022180  | 0.118023  |

SCF Energy (SMD/wB97XD/6-31+G\*\*) =  
-4341.7317756  
SCF Energy (B3LYP/6-31G\*\*) =  
-4341.80107468

H -2.852858 1.271726 -2.315273  
SCF Energy (SMD/wB97XD/6-31+G\*\*) =  
-6413.4318534  
SCF Energy (B3LYP/6-31G\*\*) =  
-6413.49942284

3a\_C001

MMFF Geometry

|    |           |           |           |
|----|-----------|-----------|-----------|
| C  | -2.299675 | -0.228626 | 0.153306  |
| C  | -2.735913 | 0.900962  | 1.154484  |
| H  | -2.972196 | 0.468653  | 2.134118  |
| C  | -1.687012 | 1.966155  | 1.334931  |
| H  | -2.104279 | 2.949166  | 1.513388  |
| C  | -0.328619 | 1.814259  | 0.664275  |
| C  | -0.102513 | 0.507664  | -0.167340 |
| C  | -0.111201 | -0.717366 | 0.809868  |
| H  | 0.139844  | -0.447189 | 1.839413  |
| O  | -1.465540 | -1.199311 | 0.835280  |
| Br | -3.921123 | -1.191203 | -0.421032 |
| C  | -1.409119 | 0.255410  | -1.023856 |
| O  | -3.911097 | 1.588625  | 0.696609  |
| H  | -4.604324 | 0.909981  | 0.590367  |
| O  | -0.519610 | 1.624283  | 2.078288  |
| C  | 1.232476  | 0.542423  | -0.953219 |
| H  | 1.386106  | 1.518360  | -1.424603 |
| H  | 1.235416  | -0.169170 | -1.783916 |
| C  | 2.395205  | 0.160726  | -0.026744 |
| H  | 2.357280  | 0.802380  | 0.861596  |
| C  | 2.338107  | -1.337967 | 0.385254  |
| C  | 0.868015  | -1.832666 | 0.443682  |
| H  | 0.587420  | -2.264594 | -0.521310 |
| H  | 0.754132  | -2.668781 | 1.146978  |
| C  | 3.112349  | -2.308183 | -0.522855 |
| H  | 2.799633  | -2.205055 | -1.567976 |
| H  | 2.929719  | -3.349626 | -0.230205 |
| H  | 4.195830  | -2.157203 | -0.475070 |
| Cl | 3.051538  | -1.486126 | 2.044263  |
| Br | 4.078289  | 0.695957  | -0.872127 |
| C  | 0.404983  | 3.079410  | 0.327434  |
| H  | 0.077823  | 3.913753  | 0.958263  |
| H  | 0.224634  | 3.369813  | -0.711882 |
| H  | 1.481580  | 2.967419  | 0.482453  |
| C  | -1.239410 | -0.838496 | -2.115268 |
| H  | -0.469969 | -0.572185 | -2.845776 |
| H  | -2.158722 | -0.957134 | -2.701445 |
| H  | -1.008234 | -1.823983 | -1.710137 |
| C  | -1.920178 | 1.495498  | -1.784774 |
| H  | -1.184418 | 1.814987  | -2.532032 |
| H  | -2.126377 | 2.362420  | -1.155314 |

3a\_C002

MMFF Geometry

|    |           |           |           |
|----|-----------|-----------|-----------|
| C  | 1.984707  | -0.177660 | -0.390349 |
| C  | 2.870574  | 1.110502  | -0.280881 |
| H  | 3.171417  | 1.451597  | -1.278730 |
| C  | 2.174500  | 2.237642  | 0.425865  |
| H  | 2.854441  | 2.869164  | 0.983738  |
| C  | 0.723815  | 2.078906  | 0.867928  |
| C  | -0.008338 | 0.721812  | 0.494923  |
| C  | -0.109330 | 0.618547  | -1.062076 |
| H  | -0.094012 | 1.603199  | -1.536269 |
| O  | 1.086734  | -0.046904 | -1.514352 |
| Br | 3.175937  | -1.693642 | -0.806742 |
| C  | 1.040833  | -0.429684 | 0.819177  |
| O  | 4.073973  | 0.865968  | 0.465385  |
| H  | 4.537409  | 0.138343  | 0.009217  |
| O  | 1.110943  | 2.896779  | -0.253373 |
| C  | -1.396426 | 0.637016  | 1.213903  |
| H  | -1.695807 | 1.656187  | 1.478815  |
| H  | -1.282729 | 0.136271  | 2.182899  |
| C  | -2.642087 | 0.123768  | 0.458926  |
| H  | -3.523502 | 0.607301  | 0.902537  |
| C  | -2.643515 | 0.378735  | -1.055481 |
| C  | -1.321599 | -0.085251 | -1.666130 |
| H  | -1.221888 | -1.172286 | -1.587798 |
| H  | -1.318097 | 0.097759  | -2.750411 |
| C  | -3.826843 | -0.256164 | -1.801563 |
| H  | -3.754366 | -1.347949 | -1.837367 |
| H  | -3.866597 | 0.082808  | -2.844034 |
| H  | -4.781711 | 0.005373  | -1.331414 |
| Cl | -2.820894 | 2.174698  | -1.305909 |
| Br | -3.007863 | -1.748622 | 0.927314  |
| C  | 0.311706  | 2.874398  | 2.074669  |
| H  | 1.082054  | 3.598188  | 2.363518  |
| H  | 0.143095  | 2.223833  | 2.938127  |
| H  | -0.598846 | 3.447092  | 1.872490  |
| C  | 0.423021  | -1.845700 | 0.800690  |
| H  | -0.297262 | -1.963080 | 1.612856  |
| H  | 1.178259  | -2.617863 | 0.987637  |
| H  | -0.053488 | -2.101714 | -0.144536 |
| C  | 1.712659  | -0.321233 | 2.206951  |
| H  | 0.969535  | -0.429597 | 3.005317  |

H 2.233158 0.619504 2.391197  
H 2.456310 -1.115298 2.342021  
**SCF Energy (SMD/wB97XD/6-31+G\*\*) =**  
**-6413.4243456**  
**SCF Energy (B3LYP/6-31G\*\*) =**  
**-6413.49640925**

H -0.443970 -0.448959 -2.934844  
H -2.143269 -0.799660 -2.839407  
H -1.037299 -1.714019 -1.841081  
**SCF Energy (SMD/wB97XD/6-31+G\*\*) =**  
**-6413.4350803**  
**SCF Energy (B3LYP/6-31G\*\*) =**  
**-6413.49823274**

**3b\_C001**

**MMFF Geometry**

C -2.340084 -0.127696 0.025523  
C -2.763329 0.994671 1.032094  
H -3.627600 1.535453 0.627498  
C -1.696859 2.025906 1.272378  
H -2.102025 3.010669 1.464481  
C -0.328418 1.853670 0.625517  
C -0.116161 0.555126 -0.223251  
C -0.183890 -0.688987 0.729751  
H 0.051411 -0.444764 1.769472  
O -1.553089 -1.132754 0.718759  
Br -3.980003 -0.990826 -0.620759  
C -1.406521 0.357156 -1.116547  
O -3.171212 0.452828 2.290827  
H -2.535997 -0.262208 2.490895  
O -0.550882 1.641342 2.030069  
C 1.239461 0.566358 -0.973726  
H 1.432998 1.546262 -1.421574  
H 1.244178 -0.129143 -1.817940  
C 2.366429 0.133438 -0.025715  
H 2.323054 0.758700 0.874047  
C 2.256630 -1.371008 0.354068  
C 0.772007 -1.824724 0.365241  
H 0.504100 -2.229355 -0.614986  
H 0.616680 -2.670816 1.048376  
C 3.026889 -2.344942 -0.553301  
H 2.744480 -2.212704 -1.603756  
H 2.807753 -3.386264 -0.286432  
H 4.112537 -2.225675 -0.474879  
Cl 2.921530 -1.571290 2.027490  
Br 4.084894 0.637227 -0.817131  
C 0.445140 3.104707 0.328693  
H 0.123812 3.936245 0.966172  
H 0.297430 3.417244 -0.709332  
H 1.514458 2.961978 0.507318  
C -1.873138 1.628111 -1.855972  
H -1.097350 1.973461 -2.549053  
H -2.116888 2.468080 -1.203172  
H -2.775836 1.429584 -2.445244  
C -1.236225 -0.714709 -2.228911

**3b\_C002**

**MMFF Geometry**

C 2.023236 -0.233464 -0.240125  
C 2.923695 1.011838 0.041494  
H 3.784627 0.707303 0.649095  
C 2.225547 2.093262 0.808767  
H 2.898779 2.646976 1.449967  
C 0.752234 1.929503 1.168397  
C 0.008957 0.635771 0.627828  
C -0.013367 0.682151 -0.936475  
H 0.044174 1.707151 -1.311640  
O 1.193198 0.036298 -1.394352  
Br 3.214704 -1.725637 -0.699196  
C 1.013312 -0.568528 0.892685  
O 3.450644 1.571603 -1.164632  
H 2.711220 1.558945 -1.803645  
O 1.206537 2.841234 0.151568  
C -1.417164 0.524046 1.263872  
H -1.706898 1.523534 1.604264  
H -1.366463 -0.064366 2.187922  
C -2.632259 0.114355 0.402749  
H -3.525052 0.578586 0.844236  
C -2.548866 0.506275 -1.079865  
C -1.206265 0.067569 -1.663923  
H -1.132759 -1.024143 -1.682899  
H -1.142200 0.349947 -2.724741  
C -3.704134 -0.027486 -1.940241  
H -3.652332 -1.112919 -2.073235  
H -3.682048 0.406278 -2.947506  
H -4.676803 0.214099 -1.496664  
Cl -2.675592 2.321573 -1.170959  
Br -3.062478 -1.782228 0.677936  
C 0.298665 2.614426 2.426792  
H 1.071108 3.283298 2.822621  
H 0.070632 1.887540 3.212143  
H -0.586323 3.230488 2.239192  
C 1.625949 -0.604649 2.311945  
H 0.841437 -0.720066 3.068405  
H 2.200881 0.282280 2.582980  
H 2.310939 -1.453893 2.419304



|   |           |           |           |
|---|-----------|-----------|-----------|
| C | 0.362860  | -1.958189 | 0.715479  |
| H | -0.396989 | -2.128062 | 1.481039  |
| H | 1.088250  | -2.766662 | 0.862486  |
| H | -0.074473 | -2.112120 | -0.269857 |

**SCF Energy (SMD/wB97XD/6-31+G\*\*) =  
-6413.4275830**

**SCF Energy (B3LYP/6-31G\*\*) =  
-6413.49520893**

|   |           |           |           |
|---|-----------|-----------|-----------|
| H | -0.437904 | -2.258310 | -0.541653 |
| C | -1.635684 | 0.359516  | -2.421536 |
| H | -0.796948 | 0.402299  | -3.125690 |
| H | -2.051710 | 1.366672  | -2.365441 |
| H | -2.412791 | -0.266071 | -2.876038 |

**SCF Energy (SMD/wB97XD/6-31+G\*\*) =  
-6413.4398102**

**SCF Energy (B3LYP/6-31G\*\*) =  
-6413.50324715**

**3c\_C001**

**MMFF Geometry**

|    |           |           |           |
|----|-----------|-----------|-----------|
| C  | -2.264262 | -0.204936 | 0.049141  |
| C  | -3.008448 | 1.161140  | 0.189625  |
| H  | -3.805029 | 1.223029  | -0.561657 |
| C  | -2.113801 | 2.344569  | -0.028709 |
| H  | -2.640864 | 3.196847  | -0.436650 |
| C  | -0.631941 | 2.124747  | -0.315828 |
| C  | -0.100826 | 0.637713  | -0.298657 |
| C  | -0.210871 | 0.074197  | 1.155883  |
| H  | -0.121122 | 0.869371  | 1.902375  |
| O  | -1.545368 | -0.467148 | 1.280185  |
| Br | -3.623333 | -1.604650 | -0.161057 |
| C  | -1.179870 | -0.229226 | -1.065510 |
| O  | -3.635409 | 1.294433  | 1.468156  |
| H  | -2.971861 | 0.985423  | 2.116162  |
| O  | -1.113969 | 2.613590  | 0.950124  |
| C  | 1.348839  | 0.576787  | -0.843628 |
| H  | 1.869666  | 1.499559  | -0.563463 |
| H  | 1.328254  | 0.586547  | -1.941063 |
| C  | 2.229420  | -0.580857 | -0.351734 |
| H  | 1.928445  | -1.518553 | -0.826123 |
| C  | 2.225356  | -0.759708 | 1.177533  |
| C  | 0.773289  | -1.008588 | 1.607182  |
| H  | 0.444933  | -1.993938 | 1.260153  |
| H  | 0.708509  | -1.093779 | 2.701987  |
| C  | 3.080315  | -1.951027 | 1.637576  |
| H  | 2.787007  | -2.869242 | 1.116000  |
| H  | 2.959633  | -2.132943 | 2.712224  |
| H  | 4.148644  | -1.793054 | 1.458092  |
| Cl | 2.831970  | 0.712552  | 2.027603  |
| Br | 4.038983  | -0.302861 | -1.086203 |
| C  | 0.059818  | 3.176685  | -1.135150 |
| H  | -0.553950 | 4.079270  | -1.231875 |
| H  | 0.263853  | 2.815574  | -2.147513 |
| H  | 1.000956  | 3.481683  | -0.667686 |
| C  | -0.689016 | -1.656600 | -1.413083 |
| H  | 0.177882  | -1.625499 | -2.080171 |
| H  | -1.452785 | -2.218865 | -1.963488 |

**3c\_C002**

**MMFF Geometry**

|    |           |           |           |
|----|-----------|-----------|-----------|
| C  | 2.131867  | -0.087453 | -0.211954 |
| C  | 2.530967  | 1.343024  | -0.686717 |
| H  | 3.464735  | 1.643432  | -0.196015 |
| C  | 1.511883  | 2.383529  | -0.345914 |
| H  | 1.954046  | 3.358937  | -0.189876 |
| C  | 0.226197  | 1.978688  | 0.366314  |
| C  | -0.000553 | 0.435997  | 0.639915  |
| C  | -0.147435 | -0.314832 | -0.727699 |
| H  | -0.568869 | 0.336739  | -1.499111 |
| O  | 1.191602  | -0.642004 | -1.164202 |
| Br | 3.754865  | -1.193356 | -0.257878 |
| C  | 1.387932  | -0.135351 | 1.155319  |
| O  | 2.773131  | 1.387421  | -2.095601 |
| H  | 2.045106  | 0.875700  | -2.500657 |
| O  | 0.258073  | 2.350503  | -1.023148 |
| C  | -1.233914 | 0.191636  | 1.555421  |
| H  | -1.480470 | 1.067987  | 2.160015  |
| H  | -1.002941 | -0.559241 | 2.312277  |
| C  | -2.504693 | -0.284781 | 0.829139  |
| H  | -3.298765 | -0.427639 | 1.572762  |
| C  | -2.280133 | -1.598875 | 0.050240  |
| C  | -0.990468 | -1.594794 | -0.793057 |
| H  | -0.371547 | -2.468074 | -0.559130 |
| H  | -1.223774 | -1.758456 | -1.855359 |
| C  | -2.221305 | -2.777567 | 1.048600  |
| H  | -1.378076 | -2.691293 | 1.738312  |
| H  | -2.111957 | -3.737467 | 0.529068  |
| H  | -3.132956 | -2.833104 | 1.655415  |
| Cl | -3.694665 | -1.996025 | -1.015872 |
| Br | -3.219352 | 1.179112  | -0.271614 |
| C  | -0.355403 | 3.029250  | 1.269664  |
| H  | 0.012138  | 4.029433  | 1.012416  |
| H  | -0.076094 | 2.844816  | 2.311516  |
| H  | -1.443942 | 3.072366  | 1.196495  |
| C  | 1.300644  | -1.579356 | 1.723175  |
| H  | 0.659562  | -1.639139 | 2.606489  |

|   |          |           |          |
|---|----------|-----------|----------|
| H | 2.280424 | -1.929635 | 2.069162 |
| H | 0.954142 | -2.312023 | 0.996621 |
| C | 2.038727 | 0.692926  | 2.283060 |
| H | 1.390864 | 0.710917  | 3.167033 |
| H | 2.248954 | 1.730784  | 2.019051 |
| H | 2.997425 | 0.256324  | 2.586153 |

**SCF Energy (SMD/wB97XD/6-31+G\*\*) =  
-6413.4279868**

**SCF Energy (B3LYP/6-31G\*\*) =  
-6413.49059957**

|   |           |           |           |
|---|-----------|-----------|-----------|
| H | -0.296651 | -1.185569 | -2.612665 |
| H | -1.993944 | -1.543178 | -2.504534 |
| H | -0.929578 | -2.120886 | -1.244660 |
| C | -1.814433 | 1.065068  | -2.209703 |
| H | -1.011740 | 1.229049  | -2.937920 |
| H | -2.101236 | 2.044568  | -1.823069 |
| H | -2.685042 | 0.688270  | -2.758857 |

**SCF Energy (SMD/wB97XD/6-31+G\*\*) =  
-6413.4331146**

**SCF Energy (B3LYP/6-31G\*\*) =  
-6413.49643845**

### 3d\_C001

#### MMFF Geometry

|    |           |           |           |
|----|-----------|-----------|-----------|
| C  | -2.346336 | -0.123058 | 0.058722  |
| C  | -2.841412 | 1.218368  | 0.696430  |
| H  | -3.690016 | 1.603303  | 0.117857  |
| C  | -1.803738 | 2.305083  | 0.699081  |
| H  | -2.232842 | 3.293549  | 0.600484  |
| C  | -0.402808 | 2.004292  | 0.183419  |
| C  | -0.124791 | 0.530358  | -0.272911 |
| C  | -0.217730 | -0.410264 | 0.980199  |
| H  | -0.024901 | 0.115335  | 1.920078  |
| O  | -1.580660 | -0.867720 | 1.044508  |
| Br | -3.934691 | -1.183034 | -0.392783 |
| C  | -1.364522 | 0.058073  | -1.131082 |
| O  | -3.308695 | 1.028011  | 2.034808  |
| H  | -2.703321 | 0.374729  | 2.436657  |
| O  | -0.691099 | 2.169732  | 1.582661  |
| C  | 1.268514  | 0.386426  | -0.935605 |
| H  | 1.474058  | 1.222408  | -1.611192 |
| H  | 1.329427  | -0.501828 | -1.570393 |
| C  | 2.337977  | 0.246430  | 0.153907  |
| H  | 2.208862  | 1.054207  | 0.884596  |
| C  | 2.241890  | -1.125536 | 0.878935  |
| C  | 0.762522  | -1.584723 | 0.988732  |
| H  | 0.506830  | -2.270589 | 0.176627  |
| H  | 0.603036  | -2.183463 | 1.895659  |
| C  | 2.870887  | -1.028842 | 2.276994  |
| H  | 3.928883  | -0.749397 | 2.227530  |
| H  | 2.807402  | -1.983108 | 2.812855  |
| H  | 2.357398  | -0.277493 | 2.887424  |
| Cl | 3.107732  | -2.449712 | -0.006658 |
| Br | 4.098041  | 0.648117  | -0.601337 |
| C  | 0.364966  | 3.152021  | -0.404304 |
| H  | -0.002581 | 4.114429  | -0.030433 |
| H  | 0.266692  | 3.169655  | -1.493817 |
| H  | 1.425488  | 3.093962  | -0.143801 |
| C  | -1.121201 | -1.270518 | -1.898958 |

### 3d\_C002

#### MMFF Geometry

|    |            |            |            |
|----|------------|------------|------------|
| C  | 2.0465810  | -0.3021550 | -0.2562290 |
| C  | 3.0256220  | 0.9129000  | -0.1709440 |
| H  | 3.8975450  | 0.6346230  | 0.4335890  |
| C  | 2.4267350  | 2.1214020  | 0.4829270  |
| H  | 3.1612230  | 2.7059250  | 1.0215670  |
| C  | 0.9679700  | 2.0897430  | 0.9243840  |
| C  | 0.1273820  | 0.7911480  | 0.5735170  |
| C  | 0.0404420  | 0.6481810  | -0.9847990 |
| H  | 0.1408740  | 1.6147010  | -1.4857840 |
| O  | 1.1833410  | -0.1231130 | -1.4038910 |
| Br | 3.1315020  | -1.9075400 | -0.5700880 |
| C  | 1.0703890  | -0.4334330 | 0.9463070  |
| O  | 3.5223210  | 1.2877210  | -1.4589870 |
| H  | 2.7729210  | 1.1692850  | -2.0751910 |
| O  | 1.4159070  | 2.8476240  | -0.2131710 |
| C  | -1.2752160 | 0.8537230  | 1.2695970  |
| H  | -1.4835170 | 1.9029100  | 1.5031310  |
| H  | -1.2240000 | 0.3699470  | 2.2524390  |
| C  | -2.5514900 | 0.4406220  | 0.5021700  |
| H  | -3.3930680 | 1.0114220  | 0.9176300  |
| C  | -2.4879500 | 0.6792370  | -1.0165490 |
| C  | -1.2226030 | 0.0385000  | -1.5853690 |
| H  | -1.2344700 | -1.0480790 | -1.4571630 |
| H  | -1.1803910 | 0.1751410  | -2.6756020 |
| C  | -2.5322850 | 2.1928540  | -1.3095290 |
| H  | -3.4818280 | 2.6313650  | -0.9796250 |
| H  | -2.4285010 | 2.3928320  | -2.3824830 |
| H  | -1.7378590 | 2.7437850  | -0.7968420 |
| Cl | -3.9193780 | -0.0132390 | -1.8800690 |
| Br | -3.0735330 | -1.3868000 | 1.0039320  |
| C  | 0.6217020  | 2.9397900  | 2.1147370  |
| H  | 1.4533880  | 3.5942400  | 2.3988180  |
| H  | 0.3870860  | 2.3223160  | 2.9869650  |
| H  | -0.2308330 | 3.5902220  | 1.8954150  |

|   |            |            |           |
|---|------------|------------|-----------|
| C | 0.3320320  | -1.7898650 | 0.9642940 |
| H | -0.4043410 | -1.8171430 | 1.7701980 |
| H | 1.0140990  | -2.6192020 | 1.1844030 |
| H | -0.1539370 | -2.0332250 | 0.0204790 |
| C | 1.7440000  | -0.3374830 | 2.3344530 |
| H | 0.9893600  | -0.3065550 | 3.1285180 |
| H | 2.3852480  | 0.5350540  | 2.4697060 |
| H | 2.3790860  | -1.2114310 | 2.5210620 |

**SCF Energy (SMD/wB97XD/6-31+G\*\*) =  
-6413.4256051**

**SCF Energy (B3LYP/6-31G\*\*) =  
-6413.48986967**

|   |           |           |           |
|---|-----------|-----------|-----------|
| H | 0.987739  | 3.543810  | -0.002346 |
| C | -0.731433 | -1.407442 | -1.562911 |
| H | 0.106755  | -1.259614 | -2.250644 |
| H | -1.520363 | -1.869194 | -2.168702 |
| H | -0.445446 | -2.148808 | -0.819162 |
| C | -1.709250 | 0.745740  | -2.173269 |
| H | -0.910175 | 0.870774  | -2.913128 |
| H | -2.072690 | 1.747229  | -1.939011 |
| H | -2.535911 | 0.224217  | -2.669571 |

**SCF Energy (SMD/wB97XD/6-31+G\*\*) =  
-6413.4362366**

**SCF Energy (B3LYP/6-31G\*\*) =  
-6413.50393842**

### 3e\_C001

#### MMFF Geometry

|    |           |           |           |
|----|-----------|-----------|-----------|
| C  | -2.234927 | -0.238988 | 0.195546  |
| C  | -2.981881 | 1.072443  | 0.612882  |
| H  | -3.380965 | 0.977524  | 1.629935  |
| C  | -2.093733 | 2.282361  | 0.555117  |
| H  | -2.631730 | 3.192804  | 0.323829  |
| C  | -0.625266 | 2.130113  | 0.172624  |
| C  | -0.091152 | 0.669085  | -0.099207 |
| C  | -0.131442 | -0.140310 | 1.236380  |
| H  | -0.012113 | 0.512374  | 2.106626  |
| O  | -1.455241 | -0.711838 | 1.318829  |
| Br | -3.592823 | -1.620475 | -0.165507 |
| C  | -1.203444 | -0.062494 | -0.955931 |
| O  | -4.090714 | 1.352402  | -0.255885 |
| H  | -4.685861 | 0.581220  | -0.199741 |
| O  | -1.056015 | 2.383810  | 1.524690  |
| C  | 1.330610  | 0.719820  | -0.714171 |
| H  | 1.862313  | 1.585453  | -0.302958 |
| H  | 1.257062  | 0.919499  | -1.791001 |
| C  | 2.236592  | -0.495696 | -0.472752 |
| H  | 1.915540  | -1.340182 | -1.088103 |
| C  | 2.306196  | -0.936858 | 1.000706  |
| C  | 0.877191  | -1.273003 | 1.447365  |
| H  | 0.536610  | -2.187368 | 0.950241  |
| H  | 0.864761  | -1.547113 | 2.512616  |
| C  | 3.185539  | -2.180477 | 1.206363  |
| H  | 2.870503  | -2.997352 | 0.547073  |
| H  | 3.116524  | -2.547638 | 2.237365  |
| H  | 4.243696  | -1.981882 | 1.007954  |
| Cl | 2.948909  | 0.371789  | 2.064969  |
| Br | 4.008633  | -0.075590 | -1.231176 |
| C  | 0.027695  | 3.317443  | -0.476056 |
| H  | -0.591168 | 4.217109  | -0.384796 |
| H  | 0.188077  | 3.143593  | -1.544231 |

### 3e\_C002

#### MMFF Geometry

|    |           |           |           |
|----|-----------|-----------|-----------|
| C  | -2.239946 | -0.249709 | 0.184922  |
| C  | -2.995153 | 1.059886  | 0.594611  |
| H  | -3.405920 | 0.948214  | 1.605886  |
| C  | -2.108240 | 2.273488  | 0.549600  |
| H  | -2.641381 | 3.184742  | 0.311594  |
| C  | -0.637242 | 2.126753  | 0.174236  |
| C  | -0.096351 | 0.668410  | -0.101035 |
| C  | -0.134722 | -0.139940 | 1.232867  |
| H  | -0.011220 | 0.513194  | 2.102291  |
| O  | -1.458508 | -0.706366 | 1.318663  |
| Br | -3.570008 | -1.658607 | -0.165782 |
| C  | -1.202767 | -0.067854 | -0.961713 |
| O  | -4.087631 | 1.335877  | -0.294574 |
| H  | -4.766352 | 1.799191  | 0.227095  |
| O  | -1.078427 | 2.374577  | 1.525490  |
| C  | 1.326884  | 0.725477  | -0.712226 |
| H  | 1.855221  | 1.590875  | -0.296257 |
| H  | 1.255561  | 0.929024  | -1.788472 |
| C  | 2.235523  | -0.488731 | -0.472938 |
| H  | 1.919161  | -1.331837 | -1.092432 |
| C  | 2.302470  | -0.935440 | 0.999032  |
| C  | 0.872964  | -1.273472 | 1.442852  |
| H  | 0.533112  | -2.186950 | 0.943891  |
| H  | 0.859196  | -1.549622 | 2.507572  |
| C  | 3.182158  | -2.179281 | 1.201529  |
| H  | 2.868151  | -2.994121 | 0.539239  |
| H  | 3.112244  | -2.549844 | 2.231249  |
| H  | 4.240406  | -1.979548 | 1.004774  |
| Cl | 2.943357  | 0.370054  | 2.069073  |
| Br | 4.008776  | -0.060333 | -1.224670 |
| C  | 0.017438  | 3.318474  | -0.464822 |
| H  | -0.603256 | 4.216746  | -0.372340 |

|   |           |           |           |
|---|-----------|-----------|-----------|
| H | 0.183756  | 3.150304  | -1.533003 |
| H | 0.974478  | 3.543904  | 0.015359  |
| C | -0.723168 | -1.409457 | -1.570174 |
| H | 0.116358  | -1.256729 | -2.255171 |
| H | -1.508186 | -1.872683 | -2.179998 |
| H | -0.436569 | -2.151558 | -0.827536 |
| C | -1.705917 | 0.739947  | -2.180684 |
| H | -0.906205 | 0.862016  | -2.920404 |
| H | -2.065931 | 1.743119  | -1.948345 |
| H | -2.533635 | 0.219549  | -2.676418 |

**SCF Energy (SMD/wB97XD/6-31+G\*\*) =  
-6413.4332766**

**SCF Energy (B3LYP/6-31G\*\*) =  
-6413.49652088**

|   |           |           |          |
|---|-----------|-----------|----------|
| H | 0.083218  | 4.071197  | 0.680192 |
| H | 0.005412  | 2.974725  | 2.055101 |
| H | -1.386392 | 3.160454  | 0.962480 |
| C | 1.273271  | -1.520555 | 1.702689 |
| H | 0.651296  | -1.519212 | 2.601506 |
| H | 2.254906  | -1.868616 | 2.045968 |
| H | 0.897130  | -2.286204 | 1.026509 |
| C | 2.065115  | 0.760855  | 2.120821 |
| H | 1.457448  | 0.802346  | 3.032323 |
| H | 2.245679  | 1.792944  | 1.816905 |
| H | 3.041519  | 0.344320  | 2.393920 |

**SCF Energy (SMD/wB97XD/6-31+G\*\*) =  
-6413.4246934**

**SCF Energy (B3LYP/6-31G\*\*) =  
-6413.49165348**

### 3e\_C003

#### MMFF Geometry

|    |           |           |           |
|----|-----------|-----------|-----------|
| C  | 2.078942  | -0.160343 | -0.335563 |
| C  | 2.505068  | 1.228226  | -0.912724 |
| H  | 2.630749  | 1.168720  | -2.000556 |
| C  | 1.514747  | 2.308804  | -0.601672 |
| H  | 1.973802  | 3.285554  | -0.513364 |
| C  | 0.238073  | 1.978541  | 0.162870  |
| C  | -0.015089 | 0.462300  | 0.541548  |
| C  | -0.219009 | -0.365944 | -0.770902 |
| H  | -0.646040 | 0.247247  | -1.570205 |
| O  | 1.098888  | -0.752876 | -1.218193 |
| Br | 3.661438  | -1.337552 | -0.385564 |
| C  | 1.374335  | -0.112118 | 1.053027  |
| O  | 3.756745  | 1.669337  | -0.362347 |
| H  | 4.413862  | 0.985651  | -0.592568 |
| O  | 0.246958  | 2.262166  | -1.249120 |
| C  | -1.225504 | 0.306172  | 1.505316  |
| H  | -1.434527 | 1.224586  | 2.059487  |
| H  | -0.987864 | -0.400426 | 2.301869  |
| C  | -2.527593 | -0.184665 | 0.847551  |
| H  | -3.301535 | -0.262521 | 1.621429  |
| C  | -2.355006 | -1.549260 | 0.146569  |
| C  | -1.093822 | -1.625912 | -0.735167 |
| H  | -0.488727 | -2.500194 | -0.470685 |
| H  | -1.365687 | -1.843607 | -1.778445 |
| C  | -2.288168 | -2.664719 | 1.214610  |
| H  | -1.421676 | -2.555087 | 1.871165  |
| H  | -2.215480 | -3.657258 | 0.753232  |
| H  | -3.180701 | -2.661885 | 1.851641  |
| Cl | -3.811441 | -1.981148 | -0.847957 |
| Br | -3.244867 | 1.223051  | -0.322831 |
| C  | -0.297466 | 3.097837  | 1.010771  |

### 3f\_C001

#### MMFF Geometry

|    |           |           |           |
|----|-----------|-----------|-----------|
| C  | -2.308960 | -0.199625 | 0.199126  |
| C  | -2.818603 | 1.092586  | 0.932011  |
| H  | -3.105830 | 0.854913  | 1.963259  |
| C  | -1.795538 | 2.196640  | 0.957367  |
| H  | -2.235740 | 3.185386  | 0.925976  |
| C  | -0.403851 | 1.953503  | 0.390836  |
| C  | -0.112387 | 0.517037  | -0.164992 |
| C  | -0.144765 | -0.496143 | 1.030803  |
| H  | 0.066668  | -0.023659 | 1.994562  |
| O  | -1.493734 | -0.986349 | 1.105549  |
| Br | -3.880481 | -1.303763 | -0.242756 |
| C  | -1.370207 | 0.067501  | -1.010333 |
| O  | -3.973928 | 1.648728  | 0.285014  |
| H  | -4.647172 | 0.942399  | 0.265514  |
| O  | -0.661614 | 2.028862  | 1.805634  |
| C  | 1.260370  | 0.443763  | -0.880230 |
| H  | 1.425720  | 1.322739  | -1.510810 |
| H  | 1.317778  | -0.403700 | -1.568818 |
| C  | 2.368755  | 0.263686  | 0.163447  |
| H  | 2.248961  | 1.024838  | 0.944022  |
| C  | 2.324030  | -1.149263 | 0.810394  |
| C  | 0.858956  | -1.646996 | 0.937967  |
| H  | 0.591707  | -2.288289 | 0.093753  |
| H  | 0.740919  | -2.302577 | 1.811303  |
| C  | 2.994496  | -1.118304 | 2.192142  |
| H  | 4.044354  | -0.812606 | 2.126899  |
| H  | 2.967799  | -2.102777 | 2.673704  |
| H  | 2.484961  | -0.414828 | 2.860207  |
| Cl | 3.189148  | -2.401483 | -0.175303 |
| Br | 4.094491  | 0.745776  | -0.623592 |

|   |           |           |           |
|---|-----------|-----------|-----------|
| C | 0.326106  | 3.150425  | -0.145200 |
| H | -0.046149 | 4.080475  | 0.299268  |
| H | 0.194788  | 3.234545  | -1.228129 |
| H | 1.394822  | 3.096613  | 0.080144  |
| C | -1.129477 | -1.213425 | -1.856964 |
| H | -0.326080 | -1.077784 | -2.586708 |
| H | -2.015500 | -1.464298 | -2.452765 |
| H | -0.908378 | -2.095994 | -1.256690 |
| C | -1.863638 | 1.121560  | -2.022040 |
| H | -1.099655 | 1.303656  | -2.786914 |
| H | -2.108617 | 2.091031  | -1.585637 |
| H | -2.768710 | 0.777061  | -2.535396 |

**SCF Energy (SMD/wB97XD/6-31+G\*\*) =  
-6413.4299064**

**SCF Energy (B3LYP/6-31G\*\*) =  
-6413.49788311**

|    |           |           |          |
|----|-----------|-----------|----------|
| Br | -3.026561 | -1.287286 | 1.231849 |
| C  | 0.631786  | 3.193391  | 1.658415 |
| H  | 1.460815  | 3.890881  | 1.822527 |
| H  | 0.452768  | 2.679153  | 2.607480 |
| H  | -0.244435 | 3.799174  | 1.406889 |
| C  | 0.383876  | -1.649607 | 1.058610 |
| H  | -0.316257 | -1.601494 | 1.895159 |
| H  | 1.093379  | -2.437656 | 1.336457 |
| H  | -0.138016 | -2.002989 | 0.170306 |
| C  | 1.819485  | -0.035696 | 2.199681 |
| H  | 1.099987  | 0.022872  | 3.024450 |
| H  | 2.407822  | 0.882300  | 2.232673 |
| H  | 2.513166  | -0.853334 | 2.427836 |

**SCF Energy (SMD/wB97XD/6-31+G\*\*) =  
-6413.4224483**

**SCF Energy (B3LYP/6-31G\*\*) =  
-6413.49143855**

### 3f\_C002

#### MMFF Geometry

|    |           |           |           |
|----|-----------|-----------|-----------|
| C  | 2.007119  | -0.277178 | -0.397782 |
| C  | 2.975100  | 0.951533  | -0.499344 |
| H  | 3.261302  | 1.125341  | -1.543579 |
| C  | 2.377443  | 2.213461  | 0.053936  |
| H  | 3.117128  | 2.870804  | 0.493802  |
| C  | 0.939911  | 2.214617  | 0.559855  |
| C  | 0.108962  | 0.872762  | 0.403409  |
| C  | -0.052321 | 0.556820  | -1.121268 |
| H  | 0.007319  | 1.461786  | -1.731737 |
| O  | 1.080257  | -0.243565 | -1.505405 |
| Br | 3.084912  | -1.912485 | -0.623616 |
| C  | 1.092427  | -0.291098 | 0.860135  |
| O  | 4.186122  | 0.736795  | 0.243111  |
| H  | 4.584343  | -0.081637 | -0.109361 |
| O  | 1.328048  | 2.840894  | -0.677781 |
| C  | -1.257315 | 0.991288  | 1.161815  |
| H  | -1.473685 | 2.056224  | 1.294029  |
| H  | -1.147343 | 0.615924  | 2.186311  |
| C  | -2.562617 | 0.481554  | 0.510304  |
| H  | -3.392611 | 1.083555  | 0.904476  |
| C  | -2.578868 | 0.554416  | -1.026459 |
| C  | -1.332774 | -0.130133 | -1.586236 |
| H  | -1.319576 | -1.196107 | -1.339669 |
| H  | -1.347195 | -0.113676 | -2.685588 |
| C  | -2.663479 | 2.026496  | -1.478775 |
| H  | -3.602753 | 2.487343  | -1.149924 |
| H  | -2.616664 | 2.109598  | -2.570971 |
| H  | -1.854040 | 2.639145  | -1.070195 |
| Cl | -4.039738 | -0.244353 | -1.735687 |

### 3g\_C001

#### MMFF Geometry

|    |           |           |           |
|----|-----------|-----------|-----------|
| C  | -2.270350 | -0.245045 | -0.005529 |
| C  | -3.094133 | 0.982082  | 0.500323  |
| H  | -3.895289 | 1.205218  | -0.214633 |
| C  | -2.272586 | 2.229727  | 0.634006  |
| H  | -2.852516 | 3.129139  | 0.474130  |
| C  | -0.783115 | 2.186000  | 0.311126  |
| C  | -0.163025 | 0.786611  | -0.075770 |
| C  | -0.236372 | -0.165056 | 1.164081  |
| H  | -0.186700 | 0.395230  | 2.102977  |
| O  | -1.535752 | -0.792530 | 1.118104  |
| Br | -3.543057 | -1.607665 | -0.613552 |
| C  | -1.188725 | 0.104492  | -1.067644 |
| O  | -3.723798 | 0.716557  | 1.756846  |
| H  | -3.059490 | 0.230341  | 2.284064  |
| O  | -1.281736 | 2.275938  | 1.658415  |
| C  | 1.287785  | 0.968170  | -0.590945 |
| H  | 1.747452  | 1.808458  | -0.058026 |
| H  | 1.267072  | 1.277573  | -1.643886 |
| C  | 2.244146  | -0.219782 | -0.416870 |
| H  | 2.009989  | -1.007069 | -1.138715 |
| C  | 2.242158  | -0.797456 | 1.009781  |
| C  | 0.813800  | -1.269078 | 1.309430  |
| H  | 0.553181  | -2.129204 | 0.684113  |
| H  | 0.749690  | -1.668732 | 2.332129  |
| C  | 2.723407  | 0.178337  | 2.095271  |
| H  | 2.630244  | -0.268451 | 3.092521  |
| H  | 2.141794  | 1.105250  | 2.105882  |
| H  | 3.775366  | 0.453016  | 1.966000  |

|    |           |           |           |
|----|-----------|-----------|-----------|
| Cl | 3.302296  | -2.263289 | 1.091166  |
| Br | 4.032408  | 0.381512  | -0.996636 |
| C  | -0.165171 | 3.462894  | -0.183684 |
| H  | -0.835801 | 4.317222  | -0.038448 |
| H  | 0.055422  | 3.404461  | -1.253645 |
| H  | 0.757446  | 3.688191  | 0.359749  |
| C  | -0.612093 | -1.138515 | -1.789618 |
| H  | 0.255620  | -0.874089 | -2.401613 |
| H  | -1.338685 | -1.565184 | -2.491462 |
| H  | -0.331472 | -1.946106 | -1.116356 |
| C  | -1.683411 | 1.018241  | -2.213615 |
| H  | -0.850509 | 1.305842  | -2.865300 |
| H  | -2.161649 | 1.942705  | -1.886003 |
| H  | -2.421068 | 0.497980  | -2.835724 |

**SCF Energy (SMD/wB97XD/6-31+G\*\*) =  
-6413.4392561**

**SCF Energy (B3LYP/6-31G\*\*) =  
-6413.50138883**

### 3g\_C002

#### MMFF Geometry

|    |           |           |           |
|----|-----------|-----------|-----------|
| C  | -2.077297 | -0.008091 | -0.196966 |
| C  | -2.506705 | -1.492415 | -0.402508 |
| H  | -3.405517 | -1.699494 | 0.190914  |
| C  | -1.464947 | -2.472554 | 0.034135  |
| H  | -1.892870 | -3.408299 | 0.369451  |
| C  | -0.138337 | -1.970291 | 0.590625  |
| C  | 0.101711  | -0.404084 | 0.606204  |
| C  | 0.168595  | 0.119304  | -0.867122 |
| H  | 0.554125  | -0.651495 | -1.541639 |
| O  | -1.193870 | 0.366460  | -1.283625 |
| Br | -3.699501 | 1.091818  | -0.334572 |
| C  | -1.253918 | 0.257411  | 1.097490  |
| O  | -2.840756 | -1.764218 | -1.766906 |
| H  | -2.150896 | -1.316608 | -2.295715 |
| O  | -0.257615 | -2.553217 | -0.720018 |
| C  | 1.382080  | -0.034267 | 1.406514  |
| H  | 1.685012  | -0.824986 | 2.096796  |
| H  | 1.177065  | 0.796212  | 2.084112  |
| C  | 2.599507  | 0.362055  | 0.553794  |
| H  | 3.426013  | 0.625091  | 1.226328  |
| C  | 2.309570  | 1.534881  | -0.399881 |
| C  | 1.001111  | 1.366137  | -1.193501 |
| H  | 0.379693  | 2.268046  | -1.149733 |
| H  | 1.234513  | 1.302211  | -2.267059 |
| C  | 3.478511  | 1.869576  | -1.341468 |
| H  | 3.297044  | 2.805936  | -1.883267 |
| H  | 3.627709  | 1.095909  | -2.101619 |

|    |           |           |           |
|----|-----------|-----------|-----------|
| H  | 4.418014  | 1.982194  | -0.788185 |
| Cl | 2.126307  | 3.026923  | 0.648724  |
| Br | 3.307707  | -1.218341 | -0.372710 |
| C  | 0.512148  | -2.873855 | 1.599521  |
| H  | 0.131237  | -3.899134 | 1.526269  |
| H  | 0.308985  | -2.530392 | 2.618501  |
| H  | 1.592584  | -2.934406 | 1.450639  |
| C  | -1.135047 | 1.776392  | 1.405322  |
| H  | -0.427667 | 1.984816  | 2.211621  |
| H  | -2.088884 | 2.183578  | 1.761728  |
| H  | -0.855263 | 2.372212  | 0.537801  |
| C  | -1.834078 | -0.366673 | 2.383289  |
| H  | -1.138822 | -0.234263 | 3.220250  |
| H  | -2.047001 | -1.434668 | 2.310687  |
| H  | -2.778976 | 0.114823  | 2.660386  |

**SCF Energy (SMD/wB97XD/6-31+G\*\*) =  
-6413.4298965**

**SCF Energy (B3LYP/6-31G\*\*) =  
-6413.49572098**

### 3h\_C001

#### MMFF Geometry

|    |           |           |           |
|----|-----------|-----------|-----------|
| C  | -2.240910 | -0.302831 | 0.156975  |
| C  | -3.068709 | 0.876225  | 0.770811  |
| H  | -3.472247 | 0.590581  | 1.749711  |
| C  | -2.253601 | 2.127728  | 0.933340  |
| H  | -2.844305 | 3.031090  | 0.849001  |
| C  | -0.777696 | 2.126925  | 0.551496  |
| C  | -0.153810 | 0.764742  | 0.052908  |
| C  | -0.156676 | -0.256219 | 1.236274  |
| H  | -0.076911 | 0.249436  | 2.203661  |
| O  | -1.444618 | -0.904361 | 1.204820  |
| Br | -3.509524 | -1.681767 | -0.449437 |
| C  | -1.212021 | 0.120807  | -0.931512 |
| O  | -4.182592 | 1.234384  | -0.061513 |
| H  | -4.728474 | 0.430584  | -0.152651 |
| O  | -1.226585 | 2.127452  | 1.920867  |
| C  | 1.268613  | 1.002418  | -0.515898 |
| H  | 1.738699  | 1.820518  | 0.041714  |
| H  | 1.194600  | 1.368911  | -1.547888 |
| C  | 2.251165  | -0.174872 | -0.451349 |
| H  | 1.997655  | -0.925439 | -1.205047 |
| C  | 2.322845  | -0.830207 | 0.939461  |
| C  | 0.917735  | -1.345812 | 1.273624  |
| H  | 0.644975  | -2.174847 | 0.612531  |
| H  | 0.905871  | -1.802920 | 2.273951  |
| C  | 2.834889  | 0.093494  | 2.055986  |
| H  | 2.794392  | -0.409614 | 3.029664  |

|    |           |           |           |
|----|-----------|-----------|-----------|
| H  | 2.238042  | 1.006485  | 2.144163  |
| H  | 3.874973  | 0.396052  | 1.896430  |
| Cl | 3.410923  | -2.277353 | 0.892884  |
| Br | 4.001861  | 0.490702  | -1.074431 |
| C  | -0.198523 | 3.441937  | 0.112289  |
| H  | -0.874344 | 4.274842  | 0.336434  |
| H  | -0.020519 | 3.452843  | -0.967124 |
| H  | 0.742026  | 3.648626  | 0.631899  |
| C  | -0.653681 | -1.075498 | -1.742074 |
| H  | 0.186404  | -0.769880 | -2.373043 |
| H  | -1.405332 | -1.470437 | -2.436196 |
| H  | -0.339043 | -1.915467 | -1.125825 |
| C  | -1.755836 | 1.087775  | -2.008544 |
| H  | -0.959672 | 1.379613  | -2.703172 |
| H  | -2.181293 | 2.013796  | -1.619356 |
| H  | -2.545318 | 0.608007  | -2.598630 |

**SCF Energy (SMD/wB97XD/6-31+G\*\*) =  
-6413.4358017**

**SCF Energy (B3LYP/6-31G\*\*) =  
-6413.50236023**

|    |           |           |           |
|----|-----------|-----------|-----------|
| H  | -3.449456 | -2.884189 | -1.606161 |
| H  | -3.762744 | -1.190831 | -1.945752 |
| H  | -4.514453 | -1.957502 | -0.537799 |
| Cl | -2.184850 | -2.928831 | 0.888874  |
| Br | -3.341341 | 1.244356  | -0.418554 |
| C  | -0.448796 | 2.999078  | 1.302169  |
| H  | -0.056773 | 4.008530  | 1.131918  |
| H  | -0.215494 | 2.737236  | 2.338792  |
| H  | -1.532720 | 3.065370  | 1.185045  |
| C  | 1.121059  | -1.690590 | 1.416283  |
| H  | 0.435272  | -1.829825 | 2.255465  |
| H  | 2.080670  | -2.083531 | 1.773486  |
| H  | 0.807800  | -2.344347 | 0.603586  |
| C  | 1.875836  | 0.503026  | 2.216889  |
| H  | 1.224056  | 0.400307  | 3.092338  |
| H  | 2.054613  | 1.571012  | 2.083229  |
| H  | 2.843579  | 0.056001  | 2.471749  |

**SCF Energy (SMD/wB97XD/6-31+G\*\*) =  
-6413.4264635**

**SCF Energy (B3LYP/6-31G\*\*) =  
-6413.49664987**

### 3h\_C002

#### MMFF Geometry

|    |           |           |           |
|----|-----------|-----------|-----------|
| C  | 2.029236  | -0.045482 | -0.344923 |
| C  | 2.484966  | 1.410162  | -0.683508 |
| H  | 2.680610  | 1.509500  | -1.758047 |
| C  | 1.470040  | 2.437014  | -0.284055 |
| H  | 1.915332  | 3.391798  | -0.033934 |
| C  | 0.153718  | 2.004831  | 0.350146  |
| C  | -0.111124 | 0.449618  | 0.502080  |
| C  | -0.241956 | -0.184784 | -0.920435 |
| H  | -0.638312 | 0.538260  | -1.640072 |
| O  | 1.099503  | -0.491179 | -1.360009 |
| Br | 3.616272  | -1.209480 | -0.485737 |
| C  | 1.250502  | -0.199642 | 0.995133  |
| O  | 3.696276  | 1.762049  | 0.004037  |
| H  | 4.365991  | 1.105836  | -0.266435 |
| O  | 0.243607  | 2.479308  | -1.007551 |
| C  | -1.365525 | 0.169063  | 1.375914  |
| H  | -1.628935 | 1.017565  | 2.011649  |
| H  | -1.147422 | -0.608937 | 2.109599  |
| C  | -2.620743 | -0.270631 | 0.603235  |
| H  | -3.424435 | -0.465350 | 1.324875  |
| C  | -2.385934 | -1.519295 | -0.265439 |
| C  | -1.107347 | -1.436317 | -1.118789 |
| H  | -0.500155 | -2.344637 | -1.030634 |
| H  | -1.382116 | -1.448670 | -2.184373 |
| C  | -3.595623 | -1.905308 | -1.133203 |

### 1a\_C001

#### B3LYP/6-31G\* Geometry

|    |           |           |           |
|----|-----------|-----------|-----------|
| C  | -1.388911 | -0.489523 | -0.462962 |
| C  | -3.045760 | 1.457615  | -0.138361 |
| C  | -0.173464 | 0.439045  | 0.059907  |
| C  | -2.656674 | 0.036680  | 0.240616  |
| H  | -3.464007 | 1.450533  | -1.158694 |
| H  | -2.562842 | -0.033538 | 1.323750  |
| C  | -1.833718 | 2.339488  | -0.133982 |
| H  | -2.061453 | 3.401124  | -0.210078 |
| C  | -0.557231 | 1.930483  | -0.110038 |
| O  | -4.001494 | 2.005201  | 0.762057  |
| H  | -4.788106 | 1.435200  | 0.700205  |
| Br | -4.288519 | -1.107843 | -0.096734 |
| C  | -1.200490 | -1.983314 | -0.107889 |
| H  | -1.906100 | -2.585193 | -0.686360 |
| H  | -1.398692 | -2.193260 | 0.947125  |
| H  | -0.193596 | -2.340695 | -0.338469 |
| C  | -1.533081 | -0.383084 | -1.999148 |
| H  | -2.489476 | -0.818590 | -2.305289 |
| H  | -0.740462 | -0.940959 | -2.506180 |
| H  | -1.498072 | 0.651339  | -2.352715 |
| C  | 0.512347  | 2.996605  | -0.248869 |
| H  | 0.048722  | 3.983495  | -0.334841 |
| H  | 1.123113  | 2.847721  | -1.148138 |
| H  | 1.197424  | 3.035665  | 0.605343  |

|    |           |           |           |
|----|-----------|-----------|-----------|
| C  | 0.105550  | 0.142423  | 1.572799  |
| H  | -0.656716 | 0.630217  | 2.188526  |
| H  | 0.015796  | -0.931609 | 1.745693  |
| C  | 1.097360  | 0.071327  | -0.779794 |
| H  | 1.035305  | 0.525487  | -1.772160 |
| H  | 1.122156  | -1.007871 | -0.938520 |
| C  | 1.484335  | 0.560481  | 2.099143  |
| H  | 1.582673  | 1.652883  | 2.125008  |
| H  | 1.592133  | 0.219387  | 3.134832  |
| C  | 2.449366  | 0.455432  | -0.170836 |
| H  | 2.609245  | 1.532222  | -0.193649 |
| C  | 2.669840  | 0.015530  | 1.279873  |
| Cl | 2.649339  | -1.832892 | 1.393338  |
| C  | 4.006258  | 0.482961  | 1.852119  |
| H  | 4.841370  | 0.073737  | 1.280697  |
| H  | 4.102468  | 0.173244  | 2.896390  |
| H  | 4.060004  | 1.578281  | 1.809357  |
| Br | 3.882460  | -0.196561 | -1.397852 |

SCF Energy (PCM/mPW1PW91/6-31+G\*\*) =  
-6264.57273596

|    |           |           |           |
|----|-----------|-----------|-----------|
| C  | 0.099449  | 0.182208  | 1.565311  |
| H  | -0.662977 | 0.684238  | 2.170070  |
| H  | 0.006503  | -0.887095 | 1.763688  |
| C  | 1.093067  | 0.054587  | -0.783068 |
| H  | 1.032593  | 0.486052  | -1.785574 |
| H  | 1.116124  | -1.027613 | -0.918061 |
| C  | 1.477963  | 0.611211  | 2.084032  |
| H  | 1.578601  | 1.703927  | 2.083242  |
| H  | 1.583924  | 0.295021  | 3.127819  |
| C  | 2.445225  | 0.450332  | -0.181625 |
| H  | 2.607552  | 1.526042  | -0.229186 |
| C  | 2.663281  | 0.044190  | 1.279511  |
| Cl | 2.638453  | -1.800072 | 1.437642  |
| C  | 3.999831  | 0.522880  | 1.842227  |
| H  | 4.834668  | 0.098234  | 1.281814  |
| H  | 4.094261  | 0.238102  | 2.893733  |
| H  | 4.056064  | 1.616721  | 1.772991  |
| Br | 3.878670  | -0.233571 | -1.390024 |

SCF Energy (PCM/mPW1PW91/6-31+G\*\*) =  
-6264.57038236

Number of imaginary frequencies = 0

#### 1a\_C002

##### B3LYP/6-31G\* Geometry

|    |           |           |           |
|----|-----------|-----------|-----------|
| C  | -1.397390 | -0.492808 | -0.454632 |
| C  | -3.058911 | 1.459533  | -0.147364 |
| C  | -0.179423 | 0.442517  | 0.045929  |
| C  | -2.678421 | 0.033413  | 0.239914  |
| H  | -3.540657 | 1.445985  | -1.131955 |
| H  | -2.569933 | -0.035756 | 1.323938  |
| C  | -1.837207 | 2.332153  | -0.208913 |
| H  | -2.062668 | 3.390038  | -0.339016 |
| C  | -0.558624 | 1.928089  | -0.165052 |
| O  | -4.051803 | 2.016454  | 0.710706  |
| H  | -3.641525 | 2.148784  | 1.581155  |
| Br | -4.277528 | -1.129229 | -0.087470 |
| C  | -1.200679 | -1.980107 | -0.074500 |
| H  | -1.905530 | -2.595069 | -0.638731 |
| H  | -1.395589 | -2.172909 | 0.984577  |
| H  | -0.192577 | -2.336626 | -0.300924 |
| C  | -1.546762 | -0.414581 | -1.992080 |
| H  | -2.499782 | -0.865073 | -2.285757 |
| H  | -0.750413 | -0.973147 | -2.492582 |
| H  | -1.524132 | 0.613727  | -2.364173 |
| C  | 0.510514  | 2.989103  | -0.338736 |
| H  | 0.047692  | 3.972774  | -0.459673 |
| H  | 1.122630  | 2.808787  | -1.231056 |
| H  | 1.194476  | 3.056127  | 0.514649  |

#### 1a\_C003

##### B3LYP/6-31G\* Geometry

|    |           |           |           |
|----|-----------|-----------|-----------|
| C  | -1.388988 | -0.489625 | -0.462901 |
| C  | -3.045761 | 1.457627  | -0.138478 |
| C  | -0.173508 | 0.438918  | 0.059865  |
| C  | -2.656790 | 0.036722  | 0.240599  |
| H  | -3.463896 | 1.450521  | -1.158835 |
| H  | -2.562955 | -0.033334 | 1.323737  |
| C  | -1.833678 | 2.339442  | -0.134004 |
| H  | -2.061346 | 3.401090  | -0.210132 |
| C  | -0.557206 | 1.930375  | -0.110050 |
| O  | -4.001615 | 2.005302  | 0.761791  |
| H  | -4.788175 | 1.435206  | 0.700012  |
| Br | -4.288704 | -1.107786 | -0.096604 |
| C  | -1.200760 | -1.983365 | -0.107576 |
| H  | -1.906508 | -2.585192 | -0.685915 |
| H  | -1.398938 | -2.193096 | 0.947495  |
| H  | -0.193935 | -2.340885 | -0.338190 |
| C  | -1.533018 | -0.383447 | -1.999130 |
| H  | -2.489270 | -0.819211 | -2.305336 |
| H  | -0.740211 | -0.941236 | -2.505969 |
| H  | -1.498162 | 0.650924  | -2.352873 |
| C  | 0.512339  | 2.996455  | -0.249274 |
| H  | 0.048722  | 3.983321  | -0.335514 |
| H  | 1.123027  | 2.847307  | -1.148532 |



|    |           |           |           |
|----|-----------|-----------|-----------|
| H  | 1.197471  | 3.035754  | 0.604898  |
| C  | 0.105541  | 0.142258  | 1.572700  |
| H  | -0.656864 | 0.629849  | 2.188420  |
| H  | 0.015975  | -0.931821 | 1.745395  |
| C  | 1.097344  | 0.071172  | -0.779813 |
| H  | 1.035180  | 0.525233  | -1.772221 |
| H  | 1.122224  | -1.008040 | -0.938409 |
| C  | 1.484249  | 0.560540  | 2.099067  |
| H  | 1.582464  | 1.652944  | 2.124929  |
| H  | 1.592012  | 0.219477  | 3.134771  |
| C  | 2.449345  | 0.455400  | -0.170938 |
| H  | 2.609212  | 1.532196  | -0.193920 |
| C  | 2.669936  | 0.015802  | 1.279869  |
| Cl | 2.650060  | -1.832602 | 1.393643  |
| C  | 4.006192  | 0.483695  | 1.852114  |
| H  | 4.841456  | 0.074741  | 1.280699  |
| H  | 4.102478  | 0.174054  | 2.896387  |
| H  | 4.059572  | 1.579037  | 1.809337  |
| Br | 3.882445  | -0.196752 | -1.397933 |

**SCF Energy (PCM/mPW1PW91/6-31+G\*\*) =  
-6264.57273352**

**Number of imaginary frequencies = 0**

|    |           |           |           |
|----|-----------|-----------|-----------|
| H  | -0.735748 | -1.756334 | -2.607589 |
| H  | -0.006637 | -3.208026 | -1.924611 |
| C  | -0.383276 | -2.180612 | 0.626049  |
| H  | 0.126235  | -3.135042 | 0.458669  |
| H  | -0.428993 | -2.047729 | 1.709385  |
| C  | -0.447073 | 0.262298  | -0.098356 |
| H  | 0.035107  | 1.003554  | -0.734687 |
| H  | -0.559719 | 0.721297  | 0.884629  |
| C  | -1.835288 | -2.326319 | 0.141158  |
| H  | -1.874848 | -2.715811 | -0.881284 |
| H  | -2.343849 | -3.066405 | 0.769268  |
| C  | -1.857645 | 0.013771  | -0.630546 |
| H  | -1.847155 | -0.304887 | -1.674104 |
| C  | -2.664371 | -1.030630 | 0.147739  |
| Cl | -2.873520 | -0.489040 | 1.907687  |
| C  | -4.064376 | -1.266177 | -0.414697 |
| H  | -4.662503 | -0.354460 | -0.370944 |
| H  | -4.572628 | -2.054605 | 0.147598  |
| H  | -3.989836 | -1.581613 | -1.463297 |
| Br | -2.796151 | 1.771544  | -0.741336 |

**SCF Energy (PCM/mPW1PW91/6-31+G\*\*) =  
-6264.56184490**

**Number of imaginary frequencies = 0**

#### 1a\_C004

##### B3LYP/6-31G\* Geometry

|    |          |           |           |
|----|----------|-----------|-----------|
| C  | 1.692087 | -0.725844 | 1.023661  |
| C  | 3.280989 | -0.249016 | -0.992592 |
| C  | 0.467237 | -1.011360 | 0.024739  |
| C  | 2.777045 | 0.184928  | 0.396361  |
| H  | 3.577076 | 0.646986  | -1.553386 |
| H  | 3.625620 | 0.232879  | 1.079905  |
| C  | 2.253756 | -1.003109 | -1.774108 |
| H  | 2.596038 | -1.302648 | -2.762820 |
| C  | 1.033705 | -1.380329 | -1.365199 |
| O  | 4.417870 | -1.120782 | -0.871375 |
| H  | 5.186663 | -0.569447 | -0.653180 |
| Br | 2.287152 | 2.140627  | 0.283197  |
| C  | 2.427347 | -2.063154 | 1.345115  |
| H  | 3.342206 | -1.860748 | 1.911776  |
| H  | 2.714251 | -2.613709 | 0.448029  |
| H  | 1.797894 | -2.703461 | 1.969365  |
| C  | 1.268824 | -0.122696 | 2.381913  |
| H  | 2.140760 | -0.098356 | 3.046521  |
| H  | 0.500830 | -0.721765 | 2.878202  |
| H  | 0.904864 | 0.901896  | 2.296775  |
| C  | 0.220359 | -2.216531 | -2.334205 |
| H  | 0.780310 | -2.368945 | -3.261232 |

#### 1a\_C005

##### B3LYP/6-31G\* Geometry

|    |          |           |           |
|----|----------|-----------|-----------|
| C  | 1.695576 | -0.715301 | 1.022216  |
| C  | 3.291375 | -0.235992 | -0.980594 |
| C  | 0.472440 | -1.004871 | 0.021856  |
| C  | 2.783351 | 0.196824  | 0.398454  |
| H  | 3.612579 | 0.654325  | -1.536473 |
| H  | 3.637636 | 0.242240  | 1.073064  |
| C  | 2.259884 | -0.979476 | -1.773497 |
| H  | 2.581486 | -1.252603 | -2.780370 |
| C  | 1.040896 | -1.367341 | -1.369339 |
| O  | 4.447124 | -1.062132 | -0.732207 |
| H  | 4.674810 | -1.504994 | -1.565409 |
| Br | 2.286703 | 2.143322  | 0.275444  |
| C  | 2.426351 | -2.052923 | 1.351137  |
| H  | 3.350152 | -1.849856 | 1.901562  |
| H  | 2.699243 | -2.614273 | 0.456458  |
| H  | 1.799719 | -2.682811 | 1.988794  |
| C  | 1.268099 | -0.109285 | 2.377963  |
| H  | 2.136647 | -0.091134 | 3.046932  |
| H  | 0.492938 | -0.703077 | 2.869532  |
| H  | 0.912098 | 0.917929  | 2.290648  |
| C  | 0.228377 | -2.197344 | -2.344045 |

|    |           |           |           |
|----|-----------|-----------|-----------|
| H  | 0.784902  | -2.340196 | -3.275030 |
| H  | -0.729772 | -1.737799 | -2.610178 |
| H  | 0.005206  | -3.192752 | -1.941890 |
| C  | -0.373940 | -2.179101 | 0.619466  |
| H  | 0.139544  | -3.131339 | 0.451363  |
| H  | -0.420256 | -2.048090 | 1.702944  |
| C  | -0.448251 | 0.264792  | -0.100974 |
| H  | 0.030432  | 1.009132  | -0.736282 |
| H  | -0.560113 | 0.721751  | 0.882987  |
| C  | -1.825414 | -2.329774 | 0.134313  |
| H  | -1.864292 | -2.716049 | -0.889517 |
| H  | -2.330236 | -3.074349 | 0.760120  |
| C  | -1.859224 | 0.012230  | -0.630458 |
| H  | -1.850727 | -0.302930 | -1.675111 |
| C  | -2.660235 | -1.037800 | 0.146179  |
| Cl | -2.869021 | -0.502566 | 1.907528  |
| C  | -4.060009 | -1.277727 | -0.415061 |
| H  | -4.661883 | -0.368668 | -0.367664 |
| H  | -4.564194 | -2.069916 | 0.145636  |
| H  | -3.985850 | -1.589659 | -1.464758 |
| Br | -2.804685 | 1.766516  | -0.733825 |

SCF Energy (PCM/mPW1PW91/6-31+G\*\*) =  
-6264.56066983

Number of imaginary frequencies = 0

|    |           |           |           |
|----|-----------|-----------|-----------|
| C  | 0.246285  | -2.169732 | -2.360575 |
| H  | 0.807380  | -2.305399 | -3.289602 |
| H  | -0.709081 | -1.704705 | -2.627374 |
| H  | 0.017440  | -3.168067 | -1.968606 |
| C  | -0.366179 | -2.179581 | 0.602541  |
| H  | 0.150704  | -3.129447 | 0.429559  |
| H  | -0.417289 | -2.056150 | 1.686826  |
| C  | -0.448511 | 0.269358  | -0.101051 |
| H  | 0.027123  | 1.018372  | -0.732843 |
| H  | -0.561639 | 0.721230  | 0.885211  |
| C  | -1.815466 | -2.333302 | 0.112266  |
| H  | -1.849554 | -2.709136 | -0.915539 |
| H  | -2.317796 | -3.086687 | 0.729439  |
| C  | -1.858895 | 0.014747  | -0.631888 |
| H  | -1.849150 | -0.291683 | -1.679114 |
| C  | -2.655635 | -1.045131 | 0.135635  |
| Cl | -2.866094 | -0.526386 | 1.901779  |
| C  | -4.054422 | -1.285711 | -0.427695 |
| H  | -4.659316 | -0.379072 | -0.373186 |
| H  | -4.555986 | -2.084020 | 0.126606  |
| H  | -3.979020 | -1.588956 | -1.479810 |
| Br | -2.810424 | 1.765777  | -0.719417 |

SCF Energy (PCM/mPW1PW91/6-31+G\*\*) =  
-6264.56223535

Number of imaginary frequencies = 0

### 1a\_C006

#### B3LYP/6-31G\* Geometry

|    |          |           |           |
|----|----------|-----------|-----------|
| C  | 1.692999 | -0.709609 | 1.024698  |
| C  | 3.310840 | -0.235614 | -0.968464 |
| C  | 0.477065 | -0.997056 | 0.015250  |
| C  | 2.785536 | 0.202457  | 0.408912  |
| H  | 3.655837 | 0.651178  | -1.506206 |
| H  | 3.632183 | 0.259605  | 1.092350  |
| C  | 2.278623 | -0.960326 | -1.775284 |
| H  | 2.617541 | -1.236623 | -2.772928 |
| C  | 1.055856 | -1.347923 | -1.376013 |
| O  | 4.496465 | -1.036000 | -0.833497 |
| H  | 4.217457 | -1.943774 | -0.638077 |
| Br | 2.276066 | 2.148005  | 0.274117  |
| C  | 2.413370 | -2.054033 | 1.356502  |
| H  | 3.382930 | -1.863793 | 1.828289  |
| H  | 2.576199 | -2.675871 | 0.471023  |
| H  | 1.821502 | -2.642220 | 2.063306  |
| C  | 1.260581 | -0.110069 | 2.381563  |
| H  | 2.120695 | -0.114914 | 3.061895  |
| H  | 0.466200 | -0.691486 | 2.857028  |
| H  | 0.927769 | 0.924958  | 2.296572  |

### 1a\_C007

#### B3LYP/6-31G\* Geometry

|    |          |          |          |
|----|----------|----------|----------|
| C  | -1.39755 | -0.37083 | -0.48722 |
| C  | -3.06815 | 1.49576  | 0.11453  |
| C  | -0.19964 | 0.43678  | 0.21195  |
| C  | -2.69056 | 0.02796  | 0.25716  |
| H  | -3.42369 | 1.67583  | -0.91324 |
| H  | -2.63548 | -0.22069 | 1.31700  |
| C  | -1.86096 | 2.34730  | 0.37015  |
| H  | -2.08570 | 3.39889  | 0.53771  |
| C  | -0.58998 | 1.92417  | 0.38004  |
| O  | -4.07703 | 1.87825  | 1.04097  |
| H  | -4.85614 | 1.33284  | 0.83439  |
| Br | -4.30677 | -1.03419 | -0.32767 |
| C  | -1.20685 | -1.89889 | -0.39622 |
| H  | -1.97817 | -2.40056 | -0.98575 |
| H  | -1.29998 | -2.26672 | 0.63068  |
| H  | -0.23602 | -2.21185 | -0.79070 |
| C  | -1.50637 | 0.01126  | -1.98336 |
| H  | -2.45006 | -0.36603 | -2.38954 |
| H  | -0.69637 | -0.43743 | -2.56490 |

|    |          |          |          |
|----|----------|----------|----------|
| H  | -1.47399 | 1.09329  | -2.13984 |
| C  | 0.49750  | 2.95197  | 0.62552  |
| H  | 0.06135  | 3.95183  | 0.70208  |
| H  | 1.24291  | 2.97854  | -0.17781 |
| H  | 1.04138  | 2.76852  | 1.56184  |
| C  | 0.14937  | -0.10745 | 1.64753  |
| H  | 0.49377  | 0.73105  | 2.26374  |
| H  | -0.75657 | -0.46670 | 2.14562  |
| C  | 1.08413  | 0.31145  | -0.68232 |
| H  | 1.09716  | 1.09945  | -1.43760 |
| H  | 1.08735  | -0.63631 | -1.22617 |
| C  | 1.20710  | -1.22761 | 1.70636  |
| H  | 1.39354  | -1.47993 | 2.75673  |
| H  | 0.81339  | -2.12997 | 1.24230  |
| C  | 2.36679  | 0.36424  | 0.14437  |
| H  | 2.36769  | 1.22692  | 0.80830  |
| C  | 2.57198  | -0.87289 | 1.03539  |
| Cl | 3.07540  | -2.32523 | -0.00146 |
| C  | 3.68231  | -0.65130 | 2.06109  |
| H  | 4.61893  | -0.37403 | 1.57159  |
| H  | 3.84300  | -1.55488 | 2.65499  |
| H  | 3.38980  | 0.15984  | 2.74092  |
| Br | 3.92225  | 0.75360  | -1.02876 |

**SCF Energy (PCM/mPW1PW91/6-31+G\*\*) =  
-6264.56514360**

**Number of imaginary frequencies = 0**

**1a\_C008**

**B3LYP/6-31G\* Geometry**

|    |           |           |           |
|----|-----------|-----------|-----------|
| C  | -1.397426 | -0.370731 | -0.487218 |
| C  | -3.068191 | 1.495794  | 0.114221  |
| C  | -0.199649 | 0.437060  | 0.211892  |
| C  | -2.690460 | 0.028037  | 0.257076  |
| H  | -3.423812 | 1.675735  | -0.913534 |
| H  | -2.635368 | -0.220502 | 1.316944  |
| C  | -1.861064 | 2.347460  | 0.369674  |
| H  | -2.085861 | 3.399033  | 0.537247  |
| C  | -0.590072 | 1.924413  | 0.379729  |
| O  | -4.077084 | 1.878269  | 1.040733  |
| H  | -4.856067 | 1.332676  | 0.834100  |
| Br | -4.306509 | -1.034405 | -0.327590 |
| C  | -1.206465 | -1.898759 | -0.396085 |
| H  | -1.977524 | -2.400621 | -0.985800 |
| H  | -1.299788 | -2.266591 | 0.630790  |
| H  | -0.235463 | -2.211544 | -0.790279 |
| C  | -1.506303 | 0.011178  | -1.983419 |
| H  | -2.449856 | -0.366445 | -2.389590 |

|    |           |           |           |
|----|-----------|-----------|-----------|
| H  | -0.696146 | -0.437357 | -2.564875 |
| H  | -1.474239 | 1.093193  | -2.140056 |
| C  | 0.497284  | 2.952222  | 0.625714  |
| H  | 0.061078  | 3.952043  | 0.702413  |
| H  | 1.242898  | 2.979043  | -0.177413 |
| H  | 1.040930  | 2.768571  | 1.562137  |
| C  | 0.149270  | -0.106855 | 1.647601  |
| H  | 0.493581  | 0.731844  | 2.263602  |
| H  | -0.756707 | -0.465957 | 2.145736  |
| C  | 1.084214  | 0.311636  | -0.682304 |
| H  | 1.097258  | 1.099656  | -1.437560 |
| H  | 1.087379  | -0.636098 | -1.226191 |
| C  | 1.207023  | -1.226944 | 1.707006  |
| H  | 1.393739  | -1.478367 | 2.757545  |
| H  | 0.813244  | -2.129746 | 1.243836  |
| C  | 2.366804  | 0.364301  | 0.144431  |
| H  | 2.367882  | 1.227050  | 0.808263  |
| C  | 2.571884  | -0.872831 | 1.035435  |
| Cl | 3.074448  | -2.325287 | -0.001374 |
| C  | 3.682538  | -0.651577 | 2.060879  |
| H  | 4.619209  | -0.374862 | 1.571162  |
| H  | 3.842912  | -1.555136 | 2.654908  |
| H  | 3.390598  | 0.159829  | 2.740626  |
| Br | 3.922362  | 0.753316  | -1.028819 |

**SCF Energy (PCM/mPW1PW91/6-31+G\*\*) =  
-6264.56514369**

**Number of imaginary frequencies = 0**

**1a\_C009**

**B3LYP/6-31G\* Geometry**

|    |           |           |           |
|----|-----------|-----------|-----------|
| C  | -1.405942 | -0.368106 | -0.487115 |
| C  | -3.080657 | 1.498240  | 0.118107  |
| C  | -0.205341 | 0.439250  | 0.205071  |
| C  | -2.712053 | 0.023089  | 0.251639  |
| H  | -3.496179 | 1.677443  | -0.879988 |
| H  | -2.640477 | -0.236123 | 1.310212  |
| C  | -1.860888 | 2.351764  | 0.324014  |
| H  | -2.080399 | 3.411248  | 0.450840  |
| C  | -0.589116 | 1.928759  | 0.353639  |
| O  | -4.130269 | 1.884811  | 1.000811  |
| H  | -3.781464 | 1.836818  | 1.906218  |
| Br | -4.296929 | -1.051955 | -0.333919 |
| C  | -1.208787 | -1.895610 | -0.392326 |
| H  | -1.979056 | -2.401557 | -0.978315 |
| H  | -1.300526 | -2.260873 | 0.635842  |
| H  | -0.236501 | -2.205771 | -0.785509 |
| C  | -1.518126 | 0.008114  | -1.984503 |

|    |           |           |           |
|----|-----------|-----------|-----------|
| H  | -2.456864 | -0.383268 | -2.388164 |
| H  | -0.702337 | -0.431609 | -2.564898 |
| H  | -1.500233 | 1.089983  | -2.145007 |
| C  | 0.498429  | 2.959500  | 0.585563  |
| H  | 0.063826  | 3.961506  | 0.641953  |
| H  | 1.247591  | 2.970319  | -0.214388 |
| H  | 1.038228  | 2.791013  | 1.527145  |
| C  | 0.142664  | -0.092307 | 1.645799  |
| H  | 0.488730  | 0.750804  | 2.255461  |
| H  | -0.763818 | -0.448909 | 2.145476  |
| C  | 1.079701  | 0.303626  | -0.686477 |
| H  | 1.094025  | 1.083521  | -1.450030 |
| H  | 1.081541  | -0.649360 | -1.220763 |
| C  | 1.198663  | -1.213625 | 1.714463  |
| H  | 1.382666  | -1.459939 | 2.766711  |
| H  | 0.803344  | -2.117479 | 1.254892  |
| C  | 2.361719  | 0.363446  | 0.140887  |
| H  | 2.362590  | 1.231950  | 0.797285  |
| C  | 2.565133  | -0.865482 | 1.043616  |
| Cl | 3.070821  | -2.327129 | 0.022441  |
| C  | 3.673053  | -0.634059 | 2.069873  |
| H  | 4.610740  | -0.361597 | 1.579712  |
| H  | 3.832570  | -1.531966 | 2.672630  |
| H  | 3.379426  | 0.183655  | 2.741386  |
| Br | 3.918644  | 0.741764  | -1.033515 |

SCF Energy (PCM/mPW1PW91/6-31+G\*\*) =  
-6264.56270109

Number of imaginary frequencies = 0

|    |           |           |           |
|----|-----------|-----------|-----------|
| C  | -1.683303 | -1.352531 | -1.521267 |
| H  | -2.663552 | -1.837379 | -1.566131 |
| H  | -0.926844 | -2.123111 | -1.696866 |
| H  | -1.622470 | -0.626979 | -2.337216 |
| C  | 0.556791  | 2.294098  | -1.742631 |
| H  | 0.131972  | 3.116451  | -2.325328 |
| H  | 1.120869  | 1.662138  | -2.440019 |
| H  | 1.281235  | 2.731301  | -1.047648 |
| C  | 0.073303  | 0.809554  | 1.305842  |
| H  | -0.658352 | 1.572727  | 1.588653  |
| H  | -0.056784 | -0.019029 | 2.006845  |
| C  | 1.010549  | -0.496309 | -0.672391 |
| H  | 0.947537  | -0.619043 | -1.756802 |
| H  | 0.982911  | -1.506159 | -0.258492 |
| C  | 1.476642  | 1.396381  | 1.528348  |
| H  | 1.602783  | 2.327572  | 0.969667  |
| H  | 1.596545  | 1.654191  | 2.586508  |
| C  | 2.399457  | 0.081102  | -0.349979 |
| H  | 2.617046  | 0.966761  | -0.939153 |
| C  | 2.600213  | 0.417041  | 1.133348  |
| Cl | 4.192494  | 1.345106  | 1.304940  |
| C  | 2.688777  | -0.792516 | 2.062504  |
| H  | 1.773573  | -1.391759 | 2.007981  |
| H  | 2.820768  | -0.461671 | 3.096316  |
| H  | 3.528996  | -1.430571 | 1.783888  |
| Br | 3.752591  | -1.222507 | -1.027690 |

SCF Energy (PCM/mPW1PW91/6-31+G\*\*) =  
-6264.57108247

Number of imaginary frequencies = 0

### 1b\_C001

#### B3LYP/6-31G\* Geometry

|    |           |           |           |
|----|-----------|-----------|-----------|
| C  | -1.493869 | -0.697545 | -0.133140 |
| C  | -3.055547 | 1.246655  | -0.789307 |
| C  | -0.226972 | 0.306420  | -0.146719 |
| C  | -2.714409 | 0.172216  | 0.233774  |
| H  | -3.524888 | 0.764776  | -1.663211 |
| H  | -2.586948 | 0.634962  | 1.211705  |
| C  | -1.808563 | 1.937350  | -1.254293 |
| H  | -1.995892 | 2.822858  | -1.858715 |
| C  | -0.550040 | 1.522124  | -1.051617 |
| O  | -3.939752 | 2.224672  | -0.255510 |
| H  | -4.759759 | 1.753352  | -0.026200 |
| Br | -4.404611 | -0.900498 | 0.512450  |
| C  | -1.359517 | -1.833703 | 0.906924  |
| H  | -2.144635 | -2.574340 | 0.735966  |
| H  | -1.477715 | -1.483201 | 1.936535  |
| H  | -0.401148 | -2.354885 | 0.828822  |

### 1b\_C002

#### B3LYP/6-31G\* Geometry

|    |           |           |           |
|----|-----------|-----------|-----------|
| C  | -1.493590 | -0.697184 | -0.133813 |
| C  | -3.055946 | 1.246684  | -0.788967 |
| C  | -0.226956 | 0.307047  | -0.146973 |
| C  | -2.714353 | 0.172046  | 0.233700  |
| H  | -3.525145 | 0.764914  | -1.662981 |
| H  | -2.586737 | 0.634591  | 1.211713  |
| C  | -1.809152 | 1.938019  | -1.253628 |
| H  | -1.996718 | 2.823921  | -1.857391 |
| C  | -0.550483 | 1.523166  | -1.051109 |
| O  | -3.940526 | 2.224178  | -0.254703 |
| H  | -4.760097 | 1.752348  | -0.024845 |
| Br | -4.404158 | -0.901254 | 0.512516  |
| C  | -1.358697 | -1.833944 | 0.905565  |
| H  | -2.143409 | -2.574895 | 0.734125  |
| H  | -1.477102 | -1.484169 | 1.935400  |

|    |           |           |           |
|----|-----------|-----------|-----------|
| H  | -0.400050 | -2.354572 | 0.827161  |
| C  | -1.682971 | -1.351446 | -1.522299 |
| H  | -2.662975 | -1.836784 | -1.567213 |
| H  | -0.926161 | -2.121548 | -1.698473 |
| H  | -1.622668 | -0.625415 | -2.337866 |
| C  | 0.556162  | 2.296337  | -1.741054 |
| H  | 0.131143  | 3.119044  | -2.323099 |
| H  | 1.120783  | 1.665335  | -2.438868 |
| H  | 1.280115  | 2.733238  | -1.045365 |
| C  | 0.073190  | 0.809429  | 1.305866  |
| H  | -0.658191 | 1.572858  | 1.588710  |
| H  | -0.057626 | -0.019331 | 2.006518  |
| C  | 1.010683  | -0.495107 | -0.673379 |
| H  | 0.947739  | -0.616469 | -1.757946 |
| H  | 0.982887  | -1.505492 | -0.260795 |
| C  | 1.476709  | 1.395487  | 1.529190  |
| H  | 1.603479  | 2.327114  | 0.971362  |
| H  | 1.596343  | 1.652350  | 2.587615  |
| C  | 2.399645  | 0.081652  | -0.350016 |
| H  | 2.617648  | 0.967842  | -0.938240 |
| C  | 2.600085  | 0.416130  | 1.133710  |
| Cl | 4.192507  | 1.343531  | 1.306769  |
| C  | 2.687878  | -0.794327 | 2.061786  |
| H  | 1.772482  | -1.393188 | 2.006364  |
| H  | 2.819569  | -0.464471 | 3.095945  |
| H  | 3.528036  | -1.432382 | 1.782934  |
| Br | 3.752587  | -1.221667 | -1.028621 |

SCF Energy (PCM/mPW1PW91/6-31+G\*\*) =  
-6264.57108013

Number of imaginary frequencies = 0

### 1b\_C003

#### B3LYP/6-31G\* Geometry

|    |           |           |           |
|----|-----------|-----------|-----------|
| C  | -1.503218 | -0.693285 | -0.131945 |
| C  | -3.066249 | 1.259223  | -0.780264 |
| C  | -0.232992 | 0.304255  | -0.152093 |
| C  | -2.736631 | 0.169213  | 0.237277  |
| H  | -3.596918 | 0.806904  | -1.626229 |
| H  | -2.596870 | 0.618400  | 1.222075  |
| C  | -1.811591 | 1.914440  | -1.285230 |
| H  | -1.996965 | 2.779547  | -1.920776 |
| C  | -0.550626 | 1.508793  | -1.071305 |
| O  | -3.989401 | 2.219843  | -0.273450 |
| H  | -3.524063 | 2.743905  | 0.399086  |
| Br | -4.397121 | -0.918403 | 0.514089  |
| C  | -1.362727 | -1.827082 | 0.910750  |
| H  | -2.150778 | -2.565671 | 0.748883  |

|    |           |           |           |
|----|-----------|-----------|-----------|
| H  | -1.473839 | -1.473259 | 1.940219  |
| H  | -0.405459 | -2.349565 | 0.828080  |
| C  | -1.697163 | -1.353885 | -1.516932 |
| H  | -2.674484 | -1.844711 | -1.552041 |
| H  | -0.936979 | -2.120148 | -1.695666 |
| H  | -1.647400 | -0.631212 | -2.336234 |
| C  | 0.555478  | 2.269578  | -1.775325 |
| H  | 0.130736  | 3.081303  | -2.372909 |
| H  | 1.119585  | 1.625385  | -2.461101 |
| H  | 1.280261  | 2.718290  | -1.087825 |
| C  | 0.068841  | 0.819064  | 1.295729  |
| H  | -0.663920 | 1.582764  | 1.575745  |
| H  | -0.060489 | -0.004047 | 2.003038  |
| C  | 1.005303  | -0.504146 | -0.668623 |
| H  | 0.942642  | -0.638088 | -1.751680 |
| H  | 0.976094  | -1.509629 | -0.244997 |
| C  | 1.471129  | 1.410461  | 1.512086  |
| H  | 1.596830  | 2.334811  | 0.941683  |
| H  | 1.591113  | 1.680803  | 2.567130  |
| C  | 2.394977  | 0.074745  | -0.351337 |
| H  | 2.614660  | 0.953656  | -0.949829 |
| C  | 2.594973  | 0.427043  | 1.128371  |
| Cl | 4.186190  | 1.358348  | 1.290941  |
| C  | 2.683298  | -0.772025 | 2.071050  |
| H  | 1.769137  | -1.373279 | 2.021710  |
| H  | 2.813625  | -0.429830 | 3.101377  |
| H  | 3.524656  | -1.411982 | 1.800470  |
| Br | 3.746893  | -1.237693 | -1.012428 |

SCF Energy (PCM/mPW1PW91/6-31+G\*\*) =  
-6264.56883166

Number of imaginary frequencies = 0

### 1b\_C004

#### B3LYP/6-31G\* Geometry

|    |           |           |           |
|----|-----------|-----------|-----------|
| C  | -1.473117 | -0.379676 | -0.565170 |
| C  | -3.034228 | 1.487438  | 0.275032  |
| C  | -0.207859 | 0.320795  | 0.137850  |
| C  | -2.710162 | 0.000327  | 0.278552  |
| H  | -3.431762 | 1.764547  | -0.715135 |
| H  | -2.612609 | -0.338103 | 1.309886  |
| C  | -1.781966 | 2.268940  | 0.534578  |
| H  | -1.956129 | 3.309847  | 0.799940  |
| C  | -0.529316 | 1.803116  | 0.440621  |
| O  | -3.980143 | 1.828135  | 1.280207  |
| H  | -4.790836 | 1.332601  | 1.069774  |
| Br | -4.396699 | -0.949459 | -0.303903 |
| C  | -1.347281 | -1.916252 | -0.618820 |

|    |           |           |           |
|----|-----------|-----------|-----------|
| H  | -2.185396 | -2.333386 | -1.182245 |
| H  | -1.370291 | -2.372955 | 0.375696  |
| H  | -0.429486 | -2.229613 | -1.124834 |
| C  | -1.640173 | 0.135084  | -2.015240 |
| H  | -2.621605 | -0.161106 | -2.398696 |
| H  | -0.884795 | -0.297770 | -2.677106 |
| H  | -1.560530 | 1.223873  | -2.081913 |
| C  | 0.604945  | 2.772918  | 0.706975  |
| H  | 0.206276  | 3.767632  | 0.924518  |
| H  | 1.281896  | 2.872796  | -0.150101 |
| H  | 1.216178  | 2.475968  | 1.568851  |
| C  | 0.184541  | -0.360192 | 1.500505  |
| H  | 0.583040  | 0.400405  | 2.181203  |
| H  | -0.706439 | -0.751687 | 2.000501  |
| C  | 1.024888  | 0.205572  | -0.827680 |
| H  | 1.012511  | 1.020596  | -1.554233 |
| H  | 0.967438  | -0.718548 | -1.410331 |
| C  | 1.222964  | -1.482265 | 1.372127  |
| H  | 1.396953  | -1.946428 | 2.347192  |
| H  | 0.839764  | -2.271902 | 0.720184  |
| C  | 2.367458  | 0.218581  | -0.088343 |
| H  | 2.453209  | 1.099342  | 0.536405  |
| C  | 2.587448  | -1.035159 | 0.787203  |
| Cl | 3.686523  | -0.516770 | 2.195840  |
| C  | 3.272646  | -2.213554 | 0.098522  |
| H  | 2.709393  | -2.492853 | -0.800440 |
| H  | 3.294951  | -3.074246 | 0.773545  |
| H  | 4.291783  | -1.966484 | -0.199573 |
| Br | 3.831614  | 0.517842  | -1.409934 |

SCF Energy (PCM/mPW1PW91/6-31+G\*\*) =  
-6264.56649738

Number of imaginary frequencies = 0

### 1b\_C005

#### B3LYP/6-31G\* Geometry

|    |          |           |           |
|----|----------|-----------|-----------|
| C  | 1.798314 | -0.726368 | 1.054578  |
| C  | 3.237867 | -0.416198 | -1.101447 |
| C  | 0.487623 | -1.000267 | 0.166862  |
| C  | 2.868631 | 0.102417  | 0.301422  |
| H  | 3.513653 | 0.440217  | -1.730382 |
| H  | 3.772317 | 0.135100  | 0.910855  |
| C  | 2.126981 | -1.173124 | -1.755520 |
| H  | 2.381677 | -1.544105 | -2.746166 |
| C  | 0.930109 | -1.480133 | -1.234786 |
| O  | 4.352927 | -1.320574 | -1.027181 |
| H  | 5.155879 | -0.786679 | -0.914193 |
| Br | 2.462169 | 2.073465  | 0.144114  |

|    |           |           |           |
|----|-----------|-----------|-----------|
| C  | 2.497461  | -2.079845 | 1.387279  |
| H  | 3.460716  | -1.894629 | 1.874063  |
| H  | 2.690484  | -2.683041 | 0.499203  |
| H  | 1.890309  | -2.661796 | 2.086506  |
| C  | 1.513235  | -0.040711 | 2.410198  |
| H  | 2.446945  | 0.016420  | 2.982121  |
| H  | 0.804339  | -0.610430 | 3.018122  |
| H  | 1.143880  | 0.980500  | 2.305528  |
| C  | 0.017029  | -2.341648 | -2.085253 |
| H  | 0.505454  | -2.582180 | -3.033824 |
| H  | -0.936245 | -1.858442 | -2.324754 |
| H  | -0.221601 | -3.291101 | -1.591632 |
| C  | -0.380032 | -2.076321 | 0.900510  |
| H  | 0.064277  | -3.068007 | 0.767286  |
| H  | -0.337874 | -1.876426 | 1.974888  |
| C  | -0.367166 | 0.310931  | 0.024979  |
| H  | 0.110635  | 0.990551  | -0.679814 |
| H  | -0.386592 | 0.836081  | 0.981720  |
| C  | -1.867361 | -2.174060 | 0.505955  |
| H  | -1.980880 | -2.618697 | -0.483659 |
| H  | -2.373476 | -2.849763 | 1.205101  |
| C  | -1.823409 | 0.114952  | -0.415081 |
| H  | -1.895478 | -0.249110 | -1.438006 |
| C  | -2.605166 | -0.821628 | 0.513095  |
| Cl | -4.273152 | -1.132896 | -0.229745 |
| C  | -2.841955 | -0.278167 | 1.921575  |
| H  | -1.889935 | -0.104497 | 2.434726  |
| H  | -3.419600 | -0.999019 | 2.506437  |
| H  | -3.385750 | 0.667603  | 1.885017  |
| Br | -2.657767 | 1.924144  | -0.542178 |

SCF Energy (PCM/mPW1PW91/6-31+G\*\*) =  
-6264.56027172

Number of imaginary frequencies = 0

### 1b\_C006

#### B3LYP/6-31G\* Geometry

|   |          |           |           |
|---|----------|-----------|-----------|
| C | 1.802583 | -0.714308 | 1.053308  |
| C | 3.249886 | -0.405624 | -1.090281 |
| C | 0.492962 | -0.993090 | 0.165035  |
| C | 2.876194 | 0.114341  | 0.302007  |
| H | 3.554171 | 0.442721  | -1.716933 |
| H | 3.784566 | 0.145306  | 0.902583  |
| C | 2.133127 | -1.150748 | -1.755658 |
| H | 2.365973 | -1.496547 | -2.764351 |
| C | 0.936769 | -1.467985 | -1.238330 |
| O | 4.392868 | -1.262408 | -0.891877 |
| H | 4.538668 | -1.752072 | -1.717260 |

|    |           |           |           |
|----|-----------|-----------|-----------|
| Br | 2.461911  | 2.075667  | 0.131858  |
| C  | 2.497153  | -2.067536 | 1.395283  |
| H  | 3.468465  | -1.882970 | 1.864575  |
| H  | 2.675283  | -2.681943 | 0.511866  |
| H  | 1.894294  | -2.637268 | 2.108281  |
| C  | 1.513941  | -0.023395 | 2.405572  |
| H  | 2.444870  | 0.027869  | 2.982329  |
| H  | 0.796955  | -0.586321 | 3.010436  |
| H  | 1.153241  | 1.000384  | 2.296135  |
| C  | 0.024058  | -2.324704 | -2.093676 |
| H  | -0.209636 | -3.278935 | -1.606903 |
| H  | 0.508161  | -2.555517 | -3.047222 |
| H  | -0.931700 | -1.842905 | -2.324594 |
| C  | -0.370540 | -2.074013 | 0.896454  |
| H  | 0.078202  | -3.063725 | 0.763060  |
| H  | -0.328950 | -1.874697 | 1.970884  |
| C  | -0.368483 | 0.314189  | 0.023408  |
| H  | 0.106251  | 0.996931  | -0.680403 |
| H  | -0.387884 | 0.837749  | 0.980928  |
| C  | -1.857451 | -2.177829 | 0.502127  |
| H  | -1.970070 | -2.621223 | -0.488241 |
| H  | -2.360069 | -2.857247 | 1.200184  |
| C  | -1.824896 | 0.113602  | -0.414182 |
| H  | -1.898280 | -0.247448 | -1.438071 |
| C  | -2.601541 | -0.828750 | 0.512520  |
| Cl | -4.268373 | -1.146301 | -0.230092 |
| C  | -2.839692 | -0.289552 | 1.922355  |
| H  | -1.888079 | -0.111838 | 2.434843  |
| H  | -3.412911 | -1.014628 | 2.506355  |
| H  | -3.388538 | 0.653375  | 1.888353  |
| Br | -2.666426 | 1.919754  | -0.534884 |

**SCF Energy (PCM/mPW1PW91/6-31+G\*\*) =  
-6264.55919170**

**Number of imaginary frequencies = 0**

**1b\_C007**

**B3LYP/6-31G\* Geometry**

|   |          |           |           |
|---|----------|-----------|-----------|
| C | 1.801958 | -0.707087 | 1.057070  |
| C | 3.268130 | -0.407341 | -1.082290 |
| C | 0.497551 | -0.986047 | 0.161517  |
| C | 2.879885 | 0.120094  | 0.309796  |
| H | 3.595559 | 0.437050  | -1.694379 |
| H | 3.783236 | 0.164328  | 0.917187  |
| C | 2.149199 | -1.136299 | -1.758834 |
| H | 2.397809 | -1.486882 | -2.759512 |
| C | 0.950080 | -1.453571 | -1.242794 |
| O | 4.432940 | -1.244633 | -1.000682 |

|    |           |           |           |
|----|-----------|-----------|-----------|
| H  | 4.138333  | -2.135256 | -0.755344 |
| Br | 2.452049  | 2.080781  | 0.127198  |
| C  | 2.485465  | -2.066176 | 1.405282  |
| H  | 3.495776  | -1.900599 | 1.793338  |
| H  | 2.553284  | -2.736979 | 0.543986  |
| H  | 1.923971  | -2.590891 | 2.183531  |
| C  | 1.510146  | -0.018826 | 2.409864  |
| H  | 2.435223  | 0.014598  | 2.997699  |
| H  | 0.775211  | -0.570113 | 3.003932  |
| H  | 1.169802  | 1.011412  | 2.297608  |
| C  | 0.039707  | -2.307040 | -2.104469 |
| H  | 0.527719  | -2.533831 | -3.056707 |
| H  | -0.914115 | -1.822218 | -2.337212 |
| H  | -0.198643 | -3.262999 | -1.623107 |
| C  | -0.363828 | -2.073031 | 0.887428  |
| H  | 0.088573  | -3.061262 | 0.753602  |
| H  | -0.327210 | -1.875697 | 1.962531  |
| C  | -0.368443 | 0.318444  | 0.024617  |
| H  | 0.103772  | 1.005053  | -0.676828 |
| H  | -0.389476 | 0.838662  | 0.984054  |
| C  | -1.848975 | -2.182266 | 0.488732  |
| H  | -1.956787 | -2.619843 | -0.504676 |
| H  | -2.349762 | -2.868394 | 1.181485  |
| C  | -1.824342 | 0.114410  | -0.414216 |
| H  | -1.895431 | -0.240928 | -1.440249 |
| C  | -2.598653 | -0.836413 | 0.505956  |
| Cl | -4.262404 | -1.156833 | -0.240654 |
| C  | -2.841122 | -0.306267 | 1.918538  |
| H  | -3.395151 | 0.633733  | 1.888868  |
| H  | -1.891158 | -0.125550 | 2.433101  |
| H  | -3.411003 | -1.037494 | 2.498135  |
| Br | -2.671556 | 1.917842  | -0.524102 |

**SCF Energy (PCM/mPW1PW91/6-31+G\*\*) =  
-6264.55919170**

**Number of imaginary frequencies = 0**

**1b\_C008**

**B3LYP/6-31G\* Geometry**

|   |           |           |           |
|---|-----------|-----------|-----------|
| C | -1.480937 | -0.388517 | -0.556237 |
| C | -3.045505 | 1.495589  | 0.251376  |
| C | -0.213364 | 0.327461  | 0.123628  |
| C | -2.731091 | 0.002293  | 0.274609  |
| H | -3.503478 | 1.751987  | -0.710755 |
| H | -2.618033 | -0.327073 | 1.309538  |
| C | -1.783151 | 2.287461  | 0.442345  |
| H | -1.953352 | 3.344046  | 0.645528  |
| C | -0.528765 | 1.819023  | 0.374177  |

|    |           |           |           |
|----|-----------|-----------|-----------|
| O  | -4.032694 | 1.863151  | 1.210362  |
| H  | -3.637350 | 1.754849  | 2.091174  |
| Br | -4.388021 | -0.970891 | -0.291843 |
| C  | -1.348816 | -1.925911 | -0.573077 |
| H  | -2.186896 | -2.359082 | -1.122950 |
| H  | -1.369545 | -2.357645 | 0.432717  |
| H  | -0.430037 | -2.248212 | -1.071749 |
| C  | -1.652419 | 0.089196  | -2.018593 |
| H  | -2.628624 | -0.231769 | -2.394798 |
| H  | -0.889515 | -0.347514 | -2.669330 |
| H  | -1.590071 | 1.177230  | -2.112309 |
| C  | 0.605488  | 2.798119  | 0.603147  |
| H  | 0.207802  | 3.801702  | 0.778122  |
| H  | 1.284860  | 2.861593  | -0.255275 |
| H  | 1.214537  | 2.535006  | 1.477618  |
| C  | 0.177226  | -0.310378 | 1.507969  |
| H  | 0.577365  | 0.470425  | 2.165106  |
| H  | -0.714762 | -0.687342 | 2.017870  |
| C  | 1.021080  | 0.179535  | -0.835896 |
| H  | 1.011237  | 0.971025  | -1.587952 |
| H  | 0.961802  | -0.761856 | -1.389524 |
| C  | 1.213718  | -1.437953 | 1.416340  |
| H  | 1.385822  | -1.871623 | 2.405670  |
| H  | 0.828437  | -2.246147 | 0.789178  |
| C  | 2.362843  | 0.213336  | -0.095592 |
| H  | 2.449258  | 1.112581  | 0.502172  |
| C  | 2.579306  | -1.012523 | 0.819000  |
| Cl | 3.677749  | -0.451363 | 2.212486  |
| C  | 3.262757  | -2.213446 | 0.168634  |
| H  | 2.698930  | -2.520152 | -0.720955 |
| H  | 3.283388  | -3.052177 | 0.870810  |
| H  | 4.282311  | -1.977763 | -0.137019 |
| Br | 3.829322  | 0.469067  | -1.422986 |

SCF Energy (PCM/mPW1PW91/6-31+G\*\*) =  
-6264.56424409

Number of imaginary frequencies = 0

### 1b\_C009

#### B3LYP/6-31G\* Geometry

|   |           |           |           |
|---|-----------|-----------|-----------|
| C | -1.473226 | -0.379702 | -0.565208 |
| C | -3.034169 | 1.487489  | 0.274789  |
| C | -0.207849 | 0.320724  | 0.137735  |
| C | -2.710210 | 0.000395  | 0.278557  |
| H | -3.431654 | 1.764563  | -0.715368 |
| H | -2.612600 | -0.337783 | 1.309969  |
| C | -1.781910 | 2.268950  | 0.534413  |
| H | -1.956017 | 3.309893  | 0.799665  |

|    |           |           |           |
|----|-----------|-----------|-----------|
| C  | -0.529259 | 1.803059  | 0.440544  |
| O  | -3.980217 | 1.828392  | 1.279874  |
| H  | -4.790475 | 1.331835  | 1.070088  |
| Br | -4.396754 | -0.949426 | -0.303742 |
| C  | -1.347623 | -1.916306 | -0.618795 |
| H  | -2.185744 | -2.333313 | -1.182314 |
| H  | -1.370814 | -2.373023 | 0.375716  |
| H  | -0.429844 | -2.229786 | -1.124742 |
| C  | -1.640380 | 0.134905  | -2.015326 |
| H  | -2.621942 | -0.161145 | -2.398573 |
| H  | -0.885204 | -0.298232 | -2.677237 |
| H  | -1.560503 | 1.223669  | -2.082159 |
| C  | 0.604936  | 2.772882  | 0.707056  |
| H  | 0.206217  | 3.767585  | 0.924529  |
| H  | 1.281968  | 2.872767  | -0.149934 |
| H  | 1.216062  | 2.475965  | 1.569037  |
| C  | 0.184520  | -0.360357 | 1.500334  |
| H  | 0.582866  | 0.400257  | 2.181085  |
| H  | -0.706487 | -0.751978 | 2.000203  |
| C  | 1.024944  | 0.205524  | -0.827778 |
| H  | 1.012516  | 1.020480  | -1.554409 |
| H  | 0.967575  | -0.718647 | -1.410361 |
| C  | 1.223030  | -1.482335 | 1.371862  |
| H  | 1.396880  | -1.946721 | 2.346850  |
| H  | 0.839972  | -2.271857 | 0.719686  |
| C  | 2.367559  | 0.218588  | -0.088429 |
| H  | 2.453322  | 1.099321  | 0.536345  |
| C  | 2.587543  | -1.035095 | 0.787164  |
| Cl | 3.686258  | -0.516530 | 2.196157  |
| C  | 3.273137  | -2.213349 | 0.098710  |
| H  | 2.710118  | -2.492931 | -0.800321 |
| H  | 3.295601  | -3.073957 | 0.773812  |
| H  | 4.292244  | -1.965963 | -0.199252 |
| Br | 3.831755  | 0.517730  | -1.409965 |

SCF Energy (PCM/mPW1PW91/6-31+G\*\*) =  
-6264.56649475

Number of imaginary frequencies = 0

### 1c\_C001

#### B3LYP/6-31G\* Geometry

|   |           |           |           |
|---|-----------|-----------|-----------|
| C | -1.594844 | 0.322458  | 0.828035  |
| C | -2.744900 | 0.523045  | -1.503201 |
| C | -0.197399 | 0.813552  | 0.179007  |
| C | -2.376230 | -0.367722 | -0.309972 |
| H | -2.943492 | -0.141512 | -2.360785 |
| H | -1.817362 | -1.231102 | -0.671389 |
| C | -1.599470 | 1.434574  | -1.832881 |



|    |           |           |           |
|----|-----------|-----------|-----------|
| H  | -1.758231 | 2.030101  | -2.729679 |
| C  | -0.492009 | 1.628701  | -1.103466 |
| O  | -3.872283 | 1.365789  | -1.291353 |
| H  | -4.611850 | 0.783425  | -1.041003 |
| Br | -4.076136 | -1.250976 | 0.323927  |
| C  | -2.380108 | 1.524707  | 1.400608  |
| H  | -3.392681 | 1.201697  | 1.658777  |
| H  | -2.470036 | 2.345764  | 0.687844  |
| H  | -1.907142 | 1.895074  | 2.315540  |
| C  | -1.394956 | -0.695349 | 1.977358  |
| H  | -2.336823 | -0.821139 | 2.516686  |
| H  | -0.650448 | -0.357587 | 2.704053  |
| H  | -1.100117 | -1.688133 | 1.623637  |
| C  | 0.476366  | 2.687913  | -1.592562 |
| H  | 0.621574  | 3.481520  | -0.850226 |
| H  | 0.087894  | 3.158848  | -2.499886 |
| H  | 1.468514  | 2.290295  | -1.832552 |
| C  | 0.570961  | 1.658893  | 1.243843  |
| H  | 0.127417  | 2.657427  | 1.312690  |
| H  | 0.419008  | 1.202723  | 2.225370  |
| C  | 0.672348  | -0.439522 | -0.196068 |
| H  | 0.282384  | -0.906631 | -1.103658 |
| H  | 0.599941  | -1.188517 | 0.595199  |
| C  | 2.090815  | 1.825745  | 1.037726  |
| H  | 2.301588  | 2.499695  | 0.206645  |
| H  | 2.518856  | 2.296112  | 1.930325  |
| C  | 2.163976  | -0.167950 | -0.424887 |
| H  | 2.335912  | 0.436180  | -1.313767 |
| C  | 2.835357  | 0.499320  | 0.782980  |
| Cl | 4.566932  | 0.952449  | 0.313052  |
| C  | 2.928725  | -0.378795 | 2.030082  |
| H  | 3.476933  | -1.298191 | 1.816565  |
| H  | 1.929780  | -0.649965 | 2.388142  |
| H  | 3.441208  | 0.163852  | 2.828880  |
| Br | 3.018016  | -1.906032 | -0.909586 |

**SCF Energy (PCM/mPW1PW91/6-31+G\*\*) =  
-6264.56649475**

**Number of imaginary frequencies = 0**

**1c\_C002**

**B3LYP/6-31G\* Geometry**

|   |           |           |           |
|---|-----------|-----------|-----------|
| C | -1.600893 | 0.311661  | 0.825148  |
| C | -2.763633 | 0.554248  | -1.486704 |
| C | -0.204084 | 0.811855  | 0.186547  |
| C | -2.401014 | -0.358652 | -0.319690 |
| H | -3.008734 | -0.084184 | -2.350074 |
| H | -1.824560 | -1.194457 | -0.716215 |

|    |           |           |           |
|----|-----------|-----------|-----------|
| C  | -1.599888 | 1.446607  | -1.821586 |
| H  | -1.730608 | 2.035054  | -2.731203 |
| C  | -0.493846 | 1.639680  | -1.088264 |
| O  | -3.909790 | 1.346291  | -1.155065 |
| H  | -4.077243 | 1.938968  | -1.904760 |
| Br | -4.060007 | -1.281095 | 0.311197  |
| C  | -2.377788 | 1.503652  | 1.430294  |
| H  | -3.400837 | 1.188831  | 1.652754  |
| H  | -2.439897 | 2.353541  | 0.748460  |
| H  | -1.914836 | 1.831995  | 2.366383  |
| C  | -1.395665 | -0.729798 | 1.952473  |
| H  | -2.331411 | -0.857295 | 2.500916  |
| H  | -0.636937 | -0.412263 | 2.673832  |
| H  | -1.117349 | -1.718606 | 1.575457  |
| C  | 0.477971  | 2.699336  | -1.568596 |
| H  | 0.097690  | 3.174304  | -2.477694 |
| H  | 1.471493  | 2.302034  | -1.801945 |
| H  | 0.618759  | 3.489845  | -0.821940 |
| C  | 0.563607  | 1.644685  | 1.261702  |
| H  | 0.119237  | 2.641976  | 1.343297  |
| H  | 0.410017  | 1.176320  | 2.237099  |
| C  | 0.668168  | -0.435121 | -0.204492 |
| H  | 0.279016  | -0.891851 | -1.117632 |
| H  | 0.594010  | -1.193174 | 0.577591  |
| C  | 2.083826  | 1.814689  | 1.060586  |
| H  | 2.296768  | 2.499629  | 0.238940  |
| H  | 2.510141  | 2.273334  | 1.960101  |
| C  | 2.160237  | -0.160859 | -0.427017 |
| H  | 2.335423  | 0.453361  | -1.308314 |
| C  | 2.829217  | 0.491758  | 0.790165  |
| Cl | 4.561646  | 0.951924  | 0.328467  |
| C  | 2.920994  | -0.401748 | 2.026428  |
| H  | 1.921568  | -0.679164 | 2.378182  |
| H  | 3.430376  | 0.131774  | 2.833327  |
| H  | 3.471378  | -1.317443 | 1.802864  |
| Br | 3.015824  | -1.892834 | -0.931334 |

**SCF Energy (PCM/mPW1PW91/6-31+G\*\*) =  
-6264.56215039**

**Number of imaginary frequencies = 0**

**1c\_C003**

**B3LYP/6-31G\* Geometry**

|   |          |           |           |
|---|----------|-----------|-----------|
| C | 1.463506 | -0.806682 | -1.006320 |
| C | 3.252749 | -1.340493 | 0.756142  |
| C | 0.411020 | -0.305369 | 0.104512  |
| C | 2.937658 | -0.633893 | -0.565413 |
| H | 3.326269 | -2.410898 | 0.513020  |

|    |           |           |           |
|----|-----------|-----------|-----------|
| H  | 3.600150  | -0.994183 | -1.353469 |
| C  | 2.141462  | -1.166709 | 1.751528  |
| H  | 2.411955  | -1.473272 | 2.760755  |
| C  | 0.880374  | -0.781319 | 1.500363  |
| O  | 4.530033  | -1.040436 | 1.288533  |
| H  | 4.570655  | -0.072939 | 1.391180  |
| Br | 3.549636  | 1.286332  | -0.430924 |
| C  | 1.288386  | -0.141050 | -2.389288 |
| H  | 1.899013  | -0.677289 | -3.125276 |
| H  | 1.616423  | 0.899980  | -2.398080 |
| H  | 0.253153  | -0.185289 | -2.741403 |
| C  | 1.302377  | -2.342837 | -1.231672 |
| H  | 2.152527  | -2.734438 | -1.801714 |
| H  | 0.403502  | -2.556543 | -1.815536 |
| H  | 1.235566  | -2.899569 | -0.293371 |
| C  | -0.099166 | -0.838852 | 2.657083  |
| H  | 0.419471  | -1.136874 | 3.572809  |
| H  | -0.889937 | -1.579319 | 2.481659  |
| H  | -0.592975 | 0.116207  | 2.859527  |
| C  | 0.273065  | 1.259132  | 0.092906  |
| H  | 1.117049  | 1.700763  | 0.623906  |
| H  | 0.355220  | 1.610024  | -0.938010 |
| C  | -0.982969 | -0.928184 | -0.270755 |
| H  | -1.015396 | -1.981736 | 0.018344  |
| H  | -1.094448 | -0.913030 | -1.357738 |
| C  | -1.022254 | 1.849157  | 0.677611  |
| H  | -1.065391 | 1.716400  | 1.761499  |
| H  | -1.023709 | 2.931366  | 0.504618  |
| C  | -2.238065 | -0.256607 | 0.310388  |
| H  | -2.339311 | -0.434663 | 1.377056  |
| C  | -2.298457 | 1.252819  | 0.056341  |
| Cl | -3.727472 | 1.946902  | 1.006617  |
| C  | -2.498971 | 1.653663  | -1.403997 |
| H  | -1.673909 | 1.285097  | -2.022918 |
| H  | -2.531353 | 2.742997  | -1.491870 |
| H  | -3.430003 | 1.237582  | -1.793366 |
| Br | -3.819409 | -1.223500 | -0.437332 |

SCF Energy (PCM/mPW1PW91/6-31+G\*\*) =  
-6264.56431906

Number of imaginary frequencies = 0

1c\_C004

B3LYP/6-31G\* Geometry

|   |          |           |           |
|---|----------|-----------|-----------|
| C | 1.469915 | -0.783920 | -1.015175 |
| C | 3.247004 | -1.345087 | 0.727055  |
| C | 0.413326 | -0.300434 | 0.099873  |
| C | 2.946475 | -0.601697 | -0.568196 |

|    |           |           |           |
|----|-----------|-----------|-----------|
| H  | 3.291590  | -2.414269 | 0.448464  |
| H  | 3.604251  | -0.962395 | -1.360268 |
| C  | 2.143909  | -1.180528 | 1.732112  |
| H  | 2.402344  | -1.500602 | 2.742616  |
| C  | 0.882125  | -0.794991 | 1.489022  |
| O  | 4.526133  | -0.962968 | 1.218590  |
| H  | 4.708907  | -1.506315 | 2.001308  |
| Br | 3.542427  | 1.303176  | -0.417153 |
| C  | 1.294970  | -0.095957 | -2.386939 |
| H  | 1.903675  | -0.622536 | -3.131626 |
| H  | 1.628244  | 0.942970  | -2.377578 |
| H  | 0.259151  | -0.132851 | -2.738611 |
| C  | 1.305575  | -2.314557 | -1.268470 |
| H  | 2.160383  | -2.697563 | -1.837419 |
| H  | 0.411860  | -2.516641 | -1.864599 |
| H  | 1.227965  | -2.889708 | -0.341852 |
| C  | -0.095692 | -0.868620 | 2.645983  |
| H  | 0.422381  | -1.179917 | 3.557892  |
| H  | -0.887957 | -1.604933 | 2.460495  |
| H  | -0.587210 | 0.084381  | 2.862146  |
| C  | 0.270056  | 1.263402  | 0.111050  |
| H  | 1.114199  | 1.700447  | 0.645341  |
| H  | 0.350534  | 1.627847  | -0.915093 |
| C  | -0.978744 | -0.921943 | -0.284628 |
| H  | -1.008628 | -1.980277 | -0.013045 |
| H  | -1.089375 | -0.889273 | -1.371220 |
| C  | -1.027081 | 1.840471  | 0.704547  |
| H  | -1.069823 | 1.693325  | 1.786626  |
| H  | -1.032005 | 2.924956  | 0.546484  |
| C  | -2.236154 | -0.263463 | 0.306203  |
| H  | -2.337964 | -0.458061 | 1.369942  |
| C  | -2.301878 | 1.249317  | 0.075388  |
| Cl | -3.733670 | 1.922923  | 1.037616  |
| C  | -2.505105 | 1.672466  | -1.378214 |
| H  | -1.679238 | 1.316659  | -2.003446 |
| H  | -2.540733 | 2.762966  | -1.448440 |
| H  | -3.435329 | 1.260009  | -1.773320 |
| Br | -3.814602 | -1.225202 | -0.456294 |

SCF Energy (PCM/mPW1PW91/6-31+G\*\*) =  
-6264.55911313

Number of imaginary frequencies = 0

1c\_C005

B3LYP/6-31G\* Geometry

|   |          |           |           |
|---|----------|-----------|-----------|
| C | 1.583896 | 0.610786  | -0.714176 |
| C | 2.621163 | -0.007433 | 1.596962  |
| C | 0.169997 | 0.849137  | 0.019729  |

|    |           |           |           |
|----|-----------|-----------|-----------|
| C  | 2.309491  | -0.442780 | 0.150806  |
| H  | 2.726444  | -0.925797 | 2.198951  |
| H  | 1.733250  | -1.367006 | 0.173257  |
| C  | 1.505514  | 0.836762  | 2.150396  |
| H  | 1.664718  | 1.144676  | 3.181825  |
| C  | 0.446612  | 1.301583  | 1.474278  |
| O  | 3.797507  | 0.781905  | 1.737573  |
| H  | 4.527741  | 0.269953  | 1.346437  |
| Br | 4.030839  | -1.100286 | -0.669227 |
| C  | 2.409490  | 1.916524  | -0.795608 |
| H  | 3.420495  | 1.677360  | -1.138433 |
| H  | 2.501195  | 2.420024  | 0.166956  |
| H  | 1.975605  | 2.612189  | -1.520797 |
| C  | 1.415454  | 0.092232  | -2.157957 |
| H  | 2.398706  | -0.037526 | -2.616428 |
| H  | 0.865379  | 0.812069  | -2.770313 |
| H  | 0.906608  | -0.875469 | -2.218084 |
| C  | -0.482780 | 2.268098  | 2.179333  |
| H  | -0.229105 | 2.328029  | 3.241528  |
| H  | -1.541564 | 1.996058  | 2.105700  |
| H  | -0.391938 | 3.280626  | 1.765073  |
| C  | -0.699903 | 1.884324  | -0.771493 |
| H  | -1.241158 | 2.531794  | -0.077783 |
| H  | -0.063865 | 2.552825  | -1.356821 |
| C  | -0.650343 | -0.498655 | 0.101625  |
| H  | -0.303626 | -1.095775 | 0.946027  |
| H  | -0.504597 | -1.104543 | -0.797716 |
| C  | -1.737370 | 1.238553  | -1.696880 |
| H  | -2.246600 | 2.005061  | -2.288757 |
| H  | -1.246351 | 0.569910  | -2.411783 |
| C  | -2.150130 | -0.253099 | 0.285067  |
| H  | -2.324701 | 0.368336  | 1.157655  |
| C  | -2.804635 | 0.397415  | -0.959288 |
| Cl | -4.124734 | 1.553636  | -0.337411 |
| C  | -3.480220 | -0.559441 | -1.939213 |
| H  | -2.767180 | -1.330798 | -2.253809 |
| H  | -3.807794 | -0.006675 | -2.824739 |
| H  | -4.341038 | -1.054915 | -1.489636 |
| Br | -3.022485 | -1.963756 | 0.834244  |

SCF Energy (PCM/mPW1PW91/6-31+G\*\*) =  
-6264.56004783

Number of imaginary frequencies = 0

1c\_C006

B3LYP/6-31G\* Geometry

|   |           |           |           |
|---|-----------|-----------|-----------|
| C | -1.452764 | -0.407927 | 1.207435  |
| C | -3.200247 | -1.571172 | -0.276032 |

|    |           |           |           |
|----|-----------|-----------|-----------|
| C  | -0.383875 | -0.326438 | 0.017862  |
| C  | -2.922023 | -0.436810 | 0.715125  |
| H  | -3.239333 | -2.491782 | 0.324255  |
| H  | -3.590429 | -0.514000 | 1.573246  |
| C  | -2.087793 | -1.702380 | -1.276138 |
| H  | -2.344955 | -2.311630 | -2.141116 |
| C  | -0.841415 | -1.220525 | -1.158071 |
| O  | -4.482409 | -1.519329 | -0.874242 |
| H  | -4.550991 | -0.654764 | -1.317013 |
| Br | -3.581409 | 1.294282  | -0.093741 |
| C  | -1.309501 | 0.715907  | 2.252740  |
| H  | -2.039881 | 0.560307  | 3.055909  |
| H  | -1.496983 | 1.705877  | 1.832084  |
| H  | -0.319124 | 0.711888  | 2.718268  |
| C  | -1.289324 | -1.758024 | 1.974739  |
| H  | -2.143058 | -1.923726 | 2.641667  |
| H  | -0.395423 | -1.744477 | 2.603184  |
| H  | -1.211454 | -2.614265 | 1.299502  |
| C  | 0.148946  | -1.564037 | -2.254737 |
| H  | -0.343671 | -2.147173 | -3.037836 |
| H  | 0.986217  | -2.166611 | -1.880552 |
| H  | 0.579140  | -0.676718 | -2.734620 |
| C  | -0.162718 | 1.128527  | -0.543170 |
| H  | 0.100728  | 1.062987  | -1.604385 |
| H  | -1.095826 | 1.687671  | -0.515763 |
| C  | 1.007857  | -0.817273 | 0.568033  |
| H  | 1.074931  | -1.906299 | 0.521525  |
| H  | 1.109995  | -0.550515 | 1.624469  |
| C  | 0.937717  | 1.923981  | 0.169671  |
| H  | 0.975042  | 2.943736  | -0.224178 |
| H  | 0.705680  | 2.017409  | 1.234634  |
| C  | 2.202523  | -0.214371 | -0.179224 |
| H  | 2.122695  | -0.390974 | -1.245122 |
| C  | 2.353716  | 1.301584  | 0.065303  |
| Cl | 3.197522  | 2.003703  | -1.437316 |
| C  | 3.198114  | 1.699355  | 1.273899  |
| H  | 2.796807  | 1.223596  | 2.177328  |
| H  | 3.159381  | 2.784244  | 1.409686  |
| H  | 4.237358  | 1.390741  | 1.157932  |
| Br | 3.845102  | -1.248745 | 0.282616  |

SCF Energy (PCM/mPW1PW91/6-31+G\*\*) =  
-6264.56060637

Number of imaginary frequencies = 0

1d\_C001

B3LYP/6-31G\* Geometry

|   |           |           |           |
|---|-----------|-----------|-----------|
| C | -1.523145 | -0.574292 | -0.197654 |
|---|-----------|-----------|-----------|

|    |           |           |           |
|----|-----------|-----------|-----------|
| C  | -3.049461 | 1.543583  | -0.176157 |
| C  | -0.228893 | 0.370109  | 0.021466  |
| C  | -2.705833 | 0.182158  | 0.443569  |
| H  | -3.611238 | 2.116371  | 0.580946  |
| H  | -2.521546 | 0.315831  | 1.509511  |
| C  | -1.789995 | 2.279221  | -0.530720 |
| H  | -1.963851 | 3.284738  | -0.908826 |
| C  | -0.542703 | 1.789489  | -0.510975 |
| O  | -3.813238 | 1.476697  | -1.375234 |
| H  | -4.615703 | 0.965412  | -1.166782 |
| Br | -4.406568 | -0.903150 | 0.483287  |
| C  | -1.382339 | -1.949147 | 0.498833  |
| H  | -2.186227 | -2.607894 | 0.162393  |
| H  | -1.462401 | -1.886529 | 1.588462  |
| H  | -0.437488 | -2.442205 | 0.253630  |
| C  | -1.767495 | -0.833813 | -1.701410 |
| H  | -2.739476 | -1.318790 | -1.830225 |
| H  | -1.005886 | -1.507176 | -2.106682 |
| H  | -1.778809 | 0.085777  | -2.288396 |
| C  | 0.559999  | 2.686221  | -1.039666 |
| H  | 0.137117  | 3.632769  | -1.387836 |
| H  | 1.078255  | 2.231677  | -1.892726 |
| H  | 1.322108  | 2.928839  | -0.290957 |
| C  | 0.128560  | 0.455132  | 1.543314  |
| H  | -0.575842 | 1.120753  | 2.052486  |
| H  | 0.007672  | -0.530238 | 2.001125  |
| C  | 0.972265  | -0.281137 | -0.744012 |
| H  | 0.873614  | -0.103208 | -1.817717 |
| H  | 0.929370  | -1.364586 | -0.619654 |
| C  | 1.549632  | 0.948642  | 1.859277  |
| H  | 1.676034  | 1.990617  | 1.552637  |
| H  | 1.709832  | 0.923902  | 2.942891  |
| C  | 2.386046  | 0.162162  | -0.328199 |
| H  | 2.612358  | 1.167340  | -0.670458 |
| C  | 2.637956  | 0.091153  | 1.183283  |
| Cl | 4.255870  | 0.915499  | 1.540393  |
| C  | 2.723817  | -1.322490 | 1.757312  |
| H  | 1.795351  | -1.874316 | 1.574718  |
| H  | 2.889928  | -1.278897 | 2.837238  |
| H  | 3.542684  | -1.875435 | 1.294301  |
| Br | 3.682848  | -0.943529 | -1.369700 |

SCF Energy (PCM/mPW1PW91/6-31+G\*\*) =  
-6264.56797283

Number of imaginary frequencies = 0

1d\_C002

B3LYP/6-31G\* Geometry

|    |           |           |           |
|----|-----------|-----------|-----------|
| C  | -1.530028 | -0.556800 | -0.231672 |
| C  | -3.058330 | 1.545692  | -0.108425 |
| C  | -0.234276 | 0.368600  | 0.042057  |
| C  | -2.728916 | 0.159791  | 0.439413  |
| H  | -3.658410 | 2.074075  | 0.649426  |
| H  | -2.529252 | 0.261795  | 1.505964  |
| C  | -1.791298 | 2.307864  | -0.385862 |
| H  | -1.947221 | 3.349224  | -0.673000 |
| C  | -0.543019 | 1.818408  | -0.400884 |
| O  | -3.827976 | 1.428381  | -1.310445 |
| H  | -3.947953 | 2.323625  | -1.664788 |
| Br | -4.400559 | -0.937716 | 0.448299  |
| C  | -1.391505 | -1.965588 | 0.394685  |
| H  | -2.186474 | -2.608887 | 0.012103  |
| H  | -1.490843 | -1.960118 | 1.484440  |
| H  | -0.439008 | -2.438704 | 0.139142  |
| C  | -1.759828 | -0.742060 | -1.749019 |
| H  | -2.748095 | -1.179300 | -1.914863 |
| H  | -1.014950 | -1.423094 | -2.172936 |
| H  | -1.726330 | 0.202262  | -2.295197 |
| C  | 0.560744  | 2.745515  | -0.870468 |
| H  | 0.142382  | 3.715692  | -1.154195 |
| H  | 1.075759  | 2.345855  | -1.752519 |
| H  | 1.325446  | 2.934799  | -0.109683 |
| C  | 0.123521  | 0.362243  | 1.566854  |
| H  | -0.582202 | 0.993491  | 2.116224  |
| H  | 0.001132  | -0.650230 | 1.959079  |
| C  | 0.967449  | -0.237417 | -0.758851 |
| H  | 0.869931  | 0.000375  | -1.821045 |
| H  | 0.922961  | -1.326097 | -0.696394 |
| C  | 1.544650  | 0.833173  | 1.915637  |
| H  | 1.674261  | 1.892775  | 1.678150  |
| H  | 1.702853  | 0.738056  | 2.995712  |
| C  | 2.380979  | 0.179802  | -0.316500 |
| H  | 2.608386  | 1.203301  | -0.598176 |
| C  | 2.632873  | 0.018511  | 1.188263  |
| Cl | 4.251252  | 0.820873  | 1.593518  |
| C  | 2.718433  | -1.426862 | 1.676399  |
| H  | 1.788207  | -1.964585 | 1.463386  |
| H  | 2.886995  | -1.448150 | 2.756600  |
| H  | 3.535180  | -1.952509 | 1.179028  |
| Br | 3.678875  | -0.860306 | -1.422655 |

SCF Energy (PCM/mPW1PW91/6-31+G\*\*) =  
-6264.56352233

Number of imaginary frequencies = 0

1d\_C003

**B3LYP/6-31G\* Geometry**

|    |           |           |           |
|----|-----------|-----------|-----------|
| C  | 1.690432  | -0.912643 | 1.130360  |
| C  | 3.402799  | -0.787203 | -0.776725 |
| C  | 0.449404  | -1.051351 | 0.113451  |
| C  | 2.898819  | -0.157245 | 0.524772  |
| H  | 3.957059  | -1.689372 | -0.478664 |
| H  | 3.704903  | -0.108520 | 1.257893  |
| C  | 2.262735  | -1.210173 | -1.658452 |
| H  | 2.568487  | -1.453673 | -2.674765 |
| C  | 0.982608  | -1.393105 | -1.298434 |
| O  | 4.376724  | -0.018100 | -1.458347 |
| H  | 3.981142  | 0.857327  | -1.618515 |
| Br | 2.575439  | 1.808549  | 0.205702  |
| C  | 2.248522  | -2.330339 | 1.468701  |
| H  | 3.218713  | -2.246768 | 1.971557  |
| H  | 2.377470  | -2.953216 | 0.579678  |
| H  | 1.580005  | -2.855990 | 2.155100  |
| C  | 1.329043  | -0.250706 | 2.478613  |
| H  | 2.163345  | -0.381341 | 3.177981  |
| H  | 0.449404  | -0.708835 | 2.941821  |
| H  | 1.154527  | 0.822878  | 2.385273  |
| C  | 0.049164  | -1.963917 | -2.348586 |
| H  | -0.320535 | -2.957258 | -2.066197 |
| H  | 0.577294  | -2.074452 | -3.299912 |
| H  | -0.829736 | -1.339157 | -2.534821 |
| C  | -0.491014 | -2.178819 | 0.663432  |
| H  | -0.068776 | -3.161627 | 0.428994  |
| H  | -0.502602 | -2.114695 | 1.755682  |
| C  | -0.370462 | 0.294671  | 0.052195  |
| H  | 0.145407  | 1.009029  | -0.587867 |
| H  | -0.392146 | 0.745985  | 1.045104  |
| C  | -1.957285 | -2.174825 | 0.189630  |
| H  | -2.031889 | -2.464913 | -0.859724 |
| H  | -2.512639 | -2.929527 | 0.758190  |
| C  | -1.828018 | 0.203562  | -0.422568 |
| H  | -1.903978 | -0.017013 | -1.484695 |
| C  | -2.658054 | -0.815286 | 0.363692  |
| Cl | -4.316954 | -0.976884 | -0.442069 |
| C  | -2.908457 | -0.449662 | 1.825609  |
| H  | -3.440794 | 0.500389  | 1.898531  |
| H  | -1.961495 | -0.352560 | 2.367448  |
| H  | -3.502786 | -1.229498 | 2.309616  |
| Br | -2.593650 | 2.046219  | -0.322270 |

**SCF Energy (PCM/mPW1PW91/6-31+G\*\*) =  
-6264.56358287**

**Number of imaginary frequencies = 0**

**1d\_C004****B3LYP/6-31G\* Geometry**

|    |           |           |           |
|----|-----------|-----------|-----------|
| C  | -1.505011 | -0.231656 | -0.532663 |
| C  | -3.036455 | 1.229915  | 0.991650  |
| C  | -0.213986 | 0.230173  | 0.308485  |
| C  | -2.705016 | -0.160899 | 0.437917  |
| H  | -3.649708 | 1.082487  | 1.896401  |
| H  | -2.549897 | -0.841696 | 1.275447  |
| C  | -1.766750 | 1.931730  | 1.370805  |
| H  | -1.916120 | 2.861004  | 1.917091  |
| C  | -0.522250 | 1.542317  | 1.064033  |
| O  | -3.730785 | 2.084570  | 0.090732  |
| H  | -4.541146 | 1.612042  | -0.171692 |
| Br | -4.407848 | -0.900175 | -0.353745 |
| C  | -1.374324 | -1.677202 | -1.058143 |
| H  | -2.231429 | -1.913010 | -1.693030 |
| H  | -1.357465 | -2.418457 | -0.252365 |
| H  | -0.475974 | -1.807478 | -1.668412 |
| C  | -1.727340 | 0.696167  | -1.750430 |
| H  | -2.695865 | 0.469217  | -2.205316 |
| H  | -0.959124 | 0.531578  | -2.512116 |
| H  | -1.734654 | 1.751683  | -1.474902 |
| C  | 0.621899  | 2.411854  | 1.546743  |
| H  | 0.232397  | 3.298631  | 2.054289  |
| H  | 1.261102  | 2.759363  | 0.726704  |
| H  | 1.269182  | 1.889635  | 2.263364  |
| C  | 0.234060  | -0.832158 | 1.381116  |
| H  | 0.661233  | -0.310919 | 2.245567  |
| H  | -0.633990 | -1.371759 | 1.772001  |
| C  | 0.981559  | 0.432226  | -0.688642 |
| H  | 0.940021  | 1.429582  | -1.130842 |
| H  | 0.900581  | -0.269572 | -1.523562 |
| C  | 1.266914  | -1.847668 | 0.875057  |
| H  | 1.479746  | -2.586774 | 1.652836  |
| H  | 0.858015  | -2.403241 | 0.027060  |
| C  | 2.351530  | 0.234243  | -0.029938 |
| H  | 2.459162  | 0.878910  | 0.833825  |
| C  | 2.606635  | -1.225130 | 0.405834  |
| Cl | 3.759566  | -1.152404 | 1.865596  |
| C  | 3.266408  | -2.125182 | -0.636677 |
| H  | 2.672027  | -2.118227 | -1.558645 |
| H  | 3.311724  | -3.152295 | -0.262555 |
| H  | 4.274773  | -1.788075 | -0.877667 |
| Br | 3.764758  | 0.948155  | -1.242980 |

**SCF Energy (PCM/mPW1PW91/6-31+G\*\*) =  
-6264.56299986**

**Number of imaginary frequencies = 0**

**1d\_C005****B3LYP/6-31G\* Geometry**

|    |           |           |           |
|----|-----------|-----------|-----------|
| C  | -1.511234 | -0.221216 | -0.535414 |
| C  | -3.043629 | 1.241404  | 0.972675  |
| C  | -0.219272 | 0.233244  | 0.305741  |
| C  | -2.725544 | -0.145918 | 0.425978  |
| H  | -3.690904 | 1.112387  | 1.854617  |
| H  | -2.552334 | -0.802961 | 1.278684  |
| C  | -1.768445 | 1.924125  | 1.382080  |
| H  | -1.904118 | 2.836965  | 1.964427  |
| C  | -0.522414 | 1.540564  | 1.070679  |
| O  | -3.746477 | 2.013770  | -0.006530 |
| H  | -3.839908 | 2.911773  | 0.348694  |
| Br | -4.400564 | -0.921262 | -0.346502 |
| C  | -1.383066 | -1.668553 | -1.057019 |
| H  | -2.236278 | -1.900940 | -1.697432 |
| H  | -1.378041 | -2.408733 | -0.250060 |
| H  | -0.479352 | -1.803097 | -1.658667 |
| C  | -1.720992 | 0.700998  | -1.759807 |
| H  | -2.705996 | 0.507379  | -2.192944 |
| H  | -0.970043 | 0.503204  | -2.531151 |
| H  | -1.685682 | 1.759020  | -1.495438 |
| C  | 0.622702  | 2.402189  | 1.564224  |
| H  | 0.236713  | 3.283437  | 2.084568  |
| H  | 1.261389  | 2.758249  | 0.747413  |
| H  | 1.270120  | 1.869373  | 2.272469  |
| C  | 0.224591  | -0.832997 | 1.376760  |
| H  | 0.650815  | -0.317087 | 2.244983  |
| H  | -0.646425 | -1.371805 | 1.761782  |
| C  | 0.978478  | 0.436130  | -0.688333 |
| H  | 0.940177  | 1.434642  | -1.128466 |
| H  | 0.896068  | -0.262901 | -1.525251 |
| C  | 1.256287  | -1.848847 | 0.869285  |
| H  | 1.466337  | -2.590591 | 1.645314  |
| H  | 0.846864  | -2.400836 | 0.019411  |
| C  | 2.347353  | 0.232739  | -0.029151 |
| H  | 2.457153  | 0.874843  | 0.836174  |
| C  | 2.598094  | -1.228286 | 0.403541  |
| Cl | 3.749221  | -1.161200 | 1.865663  |
| C  | 3.257539  | -2.127411 | -0.639905 |
| H  | 2.664627  | -2.116785 | -1.562755 |
| H  | 3.299551  | -3.155501 | -0.268176 |
| H  | 4.267171  | -1.792228 | -0.878350 |
| Br | 3.764120  | 0.946218  | -1.239266 |

**SCF Energy (PCM/mPW1PW91/6-31+G\*\*) =  
-6264.55876756**

**Number of imaginary frequencies = 0**

**1d\_C006****B3LYP/6-31G\* Geometry**

|    |          |          |          |
|----|----------|----------|----------|
| C  | -1.50780 | -0.23330 | -0.52501 |
| C  | -3.04914 | 1.23605  | 0.98773  |
| C  | -0.21828 | 0.23522  | 0.30856  |
| C  | -2.72468 | -0.15866 | 0.43319  |
| H  | -3.67276 | 1.09756  | 1.87809  |
| H  | -2.55307 | -0.82451 | 1.28005  |
| C  | -1.77513 | 1.93695  | 1.36491  |
| H  | -1.92345 | 2.86699  | 1.91176  |
| C  | -0.52787 | 1.55437  | 1.05160  |
| O  | -3.85104 | 2.06497  | 0.14979  |
| H  | -3.30160 | 2.36038  | -0.59198 |
| Br | -4.39394 | -0.92123 | -0.35819 |
| C  | -1.37522 | -1.68039 | -1.04603 |
| H  | -2.22623 | -1.91710 | -1.68794 |
| H  | -1.37284 | -2.41614 | -0.23549 |
| H  | -0.46842 | -1.81637 | -1.64266 |
| C  | -1.71873 | 0.68423  | -1.75607 |
| H  | -2.73256 | 0.54959  | -2.14529 |
| H  | -1.02168 | 0.43152  | -2.56064 |
| H  | -1.56620 | 1.74342  | -1.52267 |
| C  | 0.61504  | 2.43326  | 1.52012  |
| H  | 0.22503  | 3.32537  | 2.01799  |
| H  | 1.25513  | 2.77082  | 0.69640  |
| H  | 1.26282  | 1.92021  | 2.24280  |
| C  | 0.22818  | -0.81594 | 1.39229  |
| H  | 0.65546  | -0.28631 | 2.25153  |
| H  | -0.64153 | -1.34947 | 1.78726  |
| C  | 0.97809  | 0.42720  | -0.68988 |
| H  | 0.94093  | 1.42107  | -1.14069 |
| H  | 0.89666  | -0.28143 | -1.51894 |
| C  | 1.25966  | -1.83828 | 0.89672  |
| H  | 1.47265  | -2.56774 | 1.68344  |
| H  | 0.84837  | -2.40412 | 0.05677  |
| C  | 2.34748  | 0.23290  | -0.02933 |
| H  | 2.45519  | 0.88403  | 0.82970  |
| C  | 2.59986  | -1.22337 | 0.41774  |
| Cl | 3.75828  | -1.14078 | 1.87200  |
| C  | 3.25329  | -2.13331 | -0.62025 |
| H  | 2.65500  | -2.13277 | -1.53975 |
| H  | 3.29784  | -3.15743 | -0.23809 |
| H  | 4.26144  | -1.80058 | -0.86817 |
| Br | 3.76144  | 0.93594  | -1.24763 |

**SCF Energy (PCM/mPW1PW91/6-31+G\*\*) =  
-6264.56048207**

**Number of imaginary frequencies = 0**

## 1e\_C001

## B3LYP/6-31G\* Geometry

|    |           |           |           |
|----|-----------|-----------|-----------|
| C  | -1.294518 | -0.517689 | -0.266683 |
| C  | -3.125965 | 1.274142  | -0.581150 |
| C  | -0.171713 | 0.618830  | -0.046279 |
| C  | -2.633158 | 0.084104  | 0.227616  |
| H  | -3.457477 | 0.923185  | -1.572179 |
| H  | -2.582265 | 0.367880  | 1.278473  |
| C  | -1.999896 | 2.246993  | -0.748074 |
| H  | -2.314099 | 3.242152  | -1.056737 |
| C  | -0.699246 | 1.982916  | -0.569046 |
| O  | -4.195205 | 1.952171  | 0.066352  |
| H  | -4.920197 | 1.307587  | 0.144045  |
| Br | -4.152777 | -1.252816 | 0.246081  |
| C  | -1.023650 | -1.814134 | 0.526215  |
| H  | -1.764738 | -2.569715 | 0.254939  |
| H  | -1.100857 | -1.665246 | 1.607525  |
| H  | -0.040909 | -2.231550 | 0.299303  |
| C  | -1.413422 | -0.900376 | -1.761399 |
| H  | -2.350393 | -1.441713 | -1.925249 |
| H  | -0.599309 | -1.564880 | -2.065986 |
| H  | -1.401777 | -0.026645 | -2.419681 |
| C  | 0.290839  | 3.102165  | -0.834574 |
| H  | -0.231550 | 4.061941  | -0.881981 |
| H  | 0.811838  | 2.968864  | -1.791180 |
| H  | 1.064159  | 3.179310  | -0.062465 |
| C  | 0.177097  | 0.850903  | 1.467232  |
| H  | 0.544816  | 1.875361  | 1.574516  |
| H  | -0.735285 | 0.805800  | 2.070663  |
| C  | 1.157912  | 0.294236  | -0.816137 |
| H  | 1.703160  | 1.224310  | -0.973361 |
| H  | 0.941355  | -0.095890 | -1.811510 |
| C  | 1.230122  | -0.073246 | 2.100827  |
| H  | 1.479744  | 0.305067  | 3.098490  |
| H  | 0.835126  | -1.084288 | 2.244601  |
| C  | 2.145557  | -0.645555 | -0.123113 |
| H  | 1.774696  | -1.668455 | -0.060363 |
| C  | 2.535545  | -0.223276 | 1.298846  |
| Cl | 3.380227  | 1.427037  | 1.261890  |
| C  | 3.496376  | -1.197536 | 1.976796  |
| H  | 3.038328  | -2.193901 | 2.019053  |
| H  | 3.709960  | -0.872266 | 2.998727  |
| H  | 4.434348  | -1.272063 | 1.423475  |
| Br | 3.730715  | -0.859947 | -1.317010 |

SCF Energy (PCM/mPW1PW91/6-31+G\*\*) =  
-6264.56897174

Number of imaginary frequencies = 0

## 1e\_C002

## B3LYP/6-31G\* Geometry

|    |           |           |           |
|----|-----------|-----------|-----------|
| C  | -1.305710 | -0.519581 | -0.279589 |
| C  | -3.140418 | 1.279333  | -0.563594 |
| C  | -0.177948 | 0.610634  | -0.064521 |
| C  | -2.652248 | 0.069823  | 0.227545  |
| H  | -3.548401 | 0.943276  | -1.523776 |
| H  | -2.577325 | 0.336377  | 1.283524  |
| C  | -1.999560 | 2.228198  | -0.788725 |
| H  | -2.307514 | 3.213121  | -1.138059 |
| C  | -0.697329 | 1.967859  | -0.607777 |
| O  | -4.237355 | 1.937604  | 0.064065  |
| H  | -3.898934 | 2.358189  | 0.871791  |
| Br | -4.142969 | -1.271648 | 0.250440  |
| C  | -1.021876 | -1.819780 | 0.502494  |
| H  | -1.765324 | -2.574576 | 0.238075  |
| H  | -1.085900 | -1.677246 | 1.585696  |
| H  | -0.040495 | -2.232057 | 0.260187  |
| C  | -1.438943 | -0.895285 | -1.775027 |
| H  | -2.374900 | -1.440977 | -1.928609 |
| H  | -0.625487 | -1.554183 | -2.093203 |
| H  | -1.440557 | -0.018477 | -2.429392 |
| C  | 0.294837  | 3.077222  | -0.902984 |
| H  | -0.224045 | 4.037575  | -0.973859 |
| H  | 0.812624  | 2.917946  | -1.857180 |
| H  | 1.070911  | 3.169672  | -0.135077 |
| C  | 0.165256  | 0.862199  | 1.447726  |
| H  | 0.532671  | 1.888233  | 1.543756  |
| H  | -0.749176 | 0.821942  | 2.048688  |
| C  | 1.155283  | 0.271891  | -0.823877 |
| H  | 1.700673  | 1.198366  | -0.999726 |
| H  | 0.940808  | -0.139829 | -1.810991 |
| C  | 1.215544  | -0.052964 | 2.098187  |
| H  | 1.457205  | 0.335503  | 3.093936  |
| H  | 0.821128  | -1.063365 | 2.247930  |
| C  | 2.144938  | -0.651612 | -0.111330 |
| H  | 1.779927  | -1.675478 | -0.034494 |
| C  | 2.525995  | -0.206807 | 1.305906  |
| Cl | 3.361277  | 1.448446  | 1.250206  |
| C  | 3.488854  | -1.165543 | 2.002638  |
| H  | 3.035481  | -2.163354 | 2.058248  |
| H  | 3.696735  | -0.823547 | 3.020263  |
| H  | 4.429303  | -1.243833 | 1.454103  |
| Br | 3.736617  | -0.873244 | -1.294733 |

SCF Energy (PCM/mPW1PW91/6-31+G\*\*) =  
-6264.56660636

Number of imaginary frequencies = 0

## 1e\_C003

## B3LYP/6-31G\* Geometry

|    |           |           |           |
|----|-----------|-----------|-----------|
| C  | -1.294428 | -0.517669 | -0.266676 |
| C  | -3.126004 | 1.274012  | -0.581380 |
| C  | -0.171739 | 0.618898  | -0.046166 |
| C  | -2.633165 | 0.084120  | 0.227531  |
| H  | -3.457499 | 0.922915  | -1.572324 |
| H  | -2.582300 | 0.368048  | 1.278346  |
| C  | -1.999943 | 2.246906  | -0.748335 |
| H  | -2.314153 | 3.241985  | -1.057225 |
| C  | -0.699298 | 1.982941  | -0.569029 |
| O  | -4.195319 | 1.952079  | 0.066067  |
| H  | -4.920227 | 1.307484  | 0.144100  |
| Br | -4.152803 | -1.252868 | 0.246230  |
| C  | -1.023544 | -1.814137 | 0.526173  |
| H  | -1.764292 | -2.569877 | 0.254442  |
| H  | -1.101276 | -1.665438 | 1.607464  |
| H  | -0.040580 | -2.231228 | 0.299608  |
| C  | -1.413083 | -0.900275 | -1.761415 |
| H  | -2.349803 | -1.442014 | -1.925362 |
| H  | -0.598645 | -1.564390 | -2.066001 |
| H  | -1.401764 | -0.026493 | -2.419638 |
| C  | 0.290693  | 3.102254  | -0.834673 |
| H  | 1.064022  | 3.179481  | -0.062574 |
| H  | -0.231799 | 4.061960  | -0.882106 |
| H  | 0.811726  | 2.968981  | -1.791259 |
| C  | 0.177001  | 0.850863  | 1.467374  |
| H  | 0.544528  | 1.875369  | 1.574703  |
| H  | -0.735392 | 0.805513  | 2.070780  |
| C  | 1.157923  | 0.294335  | -0.816032 |
| H  | 1.703246  | 1.224380  | -0.973137 |
| H  | 0.941284  | -0.095670 | -1.811442 |
| C  | 1.230191  | -0.073159 | 2.100914  |
| H  | 1.479786  | 0.305220  | 3.098560  |
| H  | 0.835416  | -1.084261 | 2.244684  |
| C  | 2.145538  | -0.645509 | -0.123069 |
| H  | 1.774596  | -1.668366 | -0.060083 |
| C  | 2.535662  | -0.223071 | 1.298894  |
| Cl | 3.380196  | 1.427254  | 1.261823  |
| C  | 3.496585  | -1.197241 | 1.976850  |
| H  | 3.038656  | -2.193661 | 2.019143  |
| H  | 3.710113  | -0.871918 | 2.998765  |
| H  | 4.434560  | -1.271641 | 1.423509  |
| Br | 3.730651  | -0.860159 | -1.317036 |

SCF Energy (PCM/mPW1PW91/6-31+G\*\*) =  
-6264.56897160

Number of imaginary frequencies = 0

## 1e\_C004

## B3LYP/6-31G\* Geometry

|    |           |           |           |
|----|-----------|-----------|-----------|
| C  | -1.368571 | -0.591606 | -0.357962 |
| C  | -3.107989 | 1.309647  | -0.439306 |
| C  | -0.203575 | 0.511065  | -0.235801 |
| C  | -2.604720 | 0.064159  | 0.289340  |
| H  | -3.669297 | 0.985125  | -1.331192 |
| H  | -2.420704 | 0.307795  | 1.333943  |
| C  | -1.967492 | 2.166544  | -0.910605 |
| H  | -2.277942 | 3.119071  | -1.336142 |
| C  | -0.674310 | 1.813508  | -0.927468 |
| O  | -3.956564 | 2.094437  | 0.391797  |
| H  | -4.730682 | 1.539497  | 0.591160  |
| Br | -4.189278 | -1.179033 | 0.451989  |
| C  | -1.016618 | -1.910006 | 0.362164  |
| H  | -1.819517 | -2.635741 | 0.208413  |
| H  | -0.900269 | -1.794072 | 1.444421  |
| H  | -0.099736 | -2.349377 | -0.043187 |
| C  | -1.659634 | -0.943529 | -1.836999 |
| H  | -2.599822 | -1.500919 | -1.897407 |
| H  | -0.877561 | -1.583420 | -2.255931 |
| H  | -1.745156 | -0.057204 | -2.470723 |
| C  | 0.318010  | 2.731456  | -1.609466 |
| H  | -0.149512 | 3.695766  | -1.829587 |
| H  | 0.657828  | 2.310266  | -2.565217 |
| H  | 1.219464  | 2.920114  | -1.018228 |
| C  | 0.077820  | 0.865001  | 1.273384  |
| H  | -0.676508 | 1.571249  | 1.629853  |
| H  | -0.021350 | -0.031619 | 1.894391  |
| C  | 1.124559  | -0.048106 | -0.860817 |
| H  | 1.637307  | 0.714251  | -1.449547 |
| H  | 0.913611  | -0.866265 | -1.549906 |
| C  | 1.459432  | 1.490945  | 1.526726  |
| H  | 1.527474  | 2.445581  | 1.004238  |
| H  | 1.557448  | 1.721330  | 2.593670  |
| C  | 2.103774  | -0.540692 | 0.203350  |
| H  | 1.625577  | -1.266391 | 0.861967  |
| C  | 2.654103  | 0.578863  | 1.104583  |
| Cl | 3.854976  | 1.623583  | 0.154871  |
| C  | 3.407291  | 0.019594  | 2.310448  |
| H  | 2.713797  | -0.558765 | 2.935306  |
| H  | 3.818485  | 0.831535  | 2.916194  |
| H  | 4.220566  | -0.638109 | 1.995163  |
| Br | 3.531048  | -1.630600 | -0.645653 |

SCF Energy (PCM/mPW1PW91/6-31+G\*\*) =  
-6264.56292509

Number of imaginary frequencies = 0



## 1e\_C005

## B3LYP/6-31G\* Geometry

|    |           |           |           |
|----|-----------|-----------|-----------|
| C  | -1.378927 | -0.593653 | -0.369290 |
| C  | -3.096309 | 1.341169  | -0.349029 |
| C  | -0.211581 | 0.505828  | -0.271486 |
| C  | -2.610775 | 0.050189  | 0.306734  |
| H  | -3.801450 | 1.082763  | -1.153523 |
| H  | -2.412588 | 0.249985  | 1.358102  |
| C  | -1.971004 | 2.142607  | -0.952188 |
| H  | -2.284805 | 3.072727  | -1.428077 |
| C  | -0.680934 | 1.784189  | -1.002838 |
| O  | -3.785256 | 2.073631  | 0.672319  |
| H  | -4.282020 | 2.787846  | 0.244425  |
| Br | -4.180945 | -1.195000 | 0.429335  |
| C  | -1.009015 | -1.907162 | 0.351868  |
| H  | -1.822525 | -2.627839 | 0.237689  |
| H  | -0.852909 | -1.777431 | 1.427845  |
| H  | -0.109362 | -2.357415 | -0.079294 |
| C  | -1.693470 | -0.953504 | -1.841102 |
| H  | -2.607916 | -1.553124 | -1.878934 |
| H  | -0.892704 | -1.552657 | -2.284805 |
| H  | -1.839153 | -0.069664 | -2.467118 |
| C  | 0.294175  | 2.655980  | -1.763329 |
| H  | -0.180533 | 3.601956  | -2.041207 |
| H  | 0.622118  | 2.171493  | -2.692670 |
| H  | 1.203214  | 2.888574  | -1.198657 |
| C  | 0.059745  | 0.905269  | 1.227570  |
| H  | -0.701806 | 1.615669  | 1.559608  |
| H  | -0.034288 | 0.027710  | 1.876182  |
| C  | 1.120692  | -0.068877 | -0.872154 |
| H  | 1.641066  | 0.678435  | -1.473445 |
| H  | 0.914805  | -0.902921 | -1.543617 |
| C  | 1.438026  | 1.546680  | 1.454289  |
| H  | 1.507203  | 2.468272  | 0.874815  |
| H  | 1.533494  | 1.839809  | 2.505936  |
| C  | 2.088077  | -0.534724 | 0.214006  |
| H  | 1.600841  | -1.240573 | 0.887173  |
| C  | 2.631630  | 0.610200  | 1.088314  |
| Cl | 3.859725  | 1.614175  | 0.130136  |
| C  | 3.353712  | 0.082710  | 2.326801  |
| H  | 2.639463  | -0.462432 | 2.958043  |
| H  | 3.767205  | 0.908606  | 2.911691  |
| H  | 4.161560  | -0.598521 | 2.049410  |
| Br | 3.520761  | -1.653077 | -0.587319 |

SCF Energy (PCM/mPW1PW91/6-31+G\*\*) =  
-6264.56037657

Number of imaginary frequencies = 0

## 1e\_C006

## B3LYP/6-31G\* Geometry

|    |           |           |           |
|----|-----------|-----------|-----------|
| C  | 1.530399  | -0.542933 | 1.091638  |
| C  | 3.457885  | -0.369038 | -0.674934 |
| C  | 0.489683  | -1.029189 | -0.027675 |
| C  | 2.717662  | 0.272977  | 0.505858  |
| H  | 3.944714  | 0.425059  | -1.247326 |
| H  | 3.439514  | 0.463985  | 1.299356  |
| C  | 2.537489  | -1.149673 | -1.556255 |
| H  | 2.990439  | -1.499896 | -2.482693 |
| C  | 1.267434  | -1.492137 | -1.288556 |
| O  | 4.548085  | -1.183068 | -0.210692 |
| H  | 4.200777  | -2.074028 | -0.052184 |
| Br | 2.253602  | 2.162070  | -0.037135 |
| C  | 2.189379  | -1.785582 | 1.766625  |
| H  | 3.097294  | -1.497733 | 2.305510  |
| H  | 2.454054  | -2.565440 | 1.046565  |
| H  | 1.508673  | -2.232873 | 2.497191  |
| C  | 0.932358  | 0.295337  | 2.243133  |
| H  | 1.728387  | 0.529116  | 2.960949  |
| H  | 0.160039  | -0.246307 | 2.793610  |
| H  | 0.531464  | 1.249538  | 1.899082  |
| C  | 0.549525  | -2.350806 | -2.315340 |
| H  | 0.474852  | -3.396098 | -1.989708 |
| H  | 1.096961  | -2.343652 | -3.262032 |
| H  | -0.471236 | -2.010640 | -2.518757 |
| C  | -0.401920 | -2.222652 | 0.457201  |
| H  | -0.821058 | -2.706993 | -0.425339 |
| H  | 0.200321  | -2.987876 | 0.952860  |
| C  | -0.490713 | 0.092409  | -0.541170 |
| H  | -0.882727 | -0.212500 | -1.514836 |
| H  | 0.057861  | 1.017736  | -0.707100 |
| C  | -1.605570 | -1.876174 | 1.343763  |
| H  | -2.179881 | -2.789272 | 1.536725  |
| H  | -1.297389 | -1.496850 | 2.324679  |
| C  | -1.701462 | 0.387997  | 0.348164  |
| H  | -1.407328 | 0.862470  | 1.283382  |
| C  | -2.554031 | -0.828756 | 0.727390  |
| Cl | -3.310822 | -1.573704 | -0.793700 |
| C  | -3.703577 | -0.489412 | 1.673243  |
| H  | -3.301315 | -0.049420 | 2.594611  |
| H  | -4.260721 | -1.392907 | 1.936492  |
| H  | -4.386026 | 0.230229  | 1.217370  |
| Br | -2.775477 | 1.822721  | -0.528250 |

SCF Energy (PCM/mPW1PW91/6-31+G\*\*) =  
-6264.56109795

Number of imaginary frequencies = 0

## 1e\_C007

## B3LYP/6-31G\* Geometry

|    |           |           |           |
|----|-----------|-----------|-----------|
| C  | -1.377114 | -0.585405 | -0.351721 |
| C  | -3.120925 | 1.318649  | -0.421694 |
| C  | -0.210471 | 0.514280  | -0.239199 |
| C  | -2.625472 | 0.059129  | 0.299076  |
| H  | -3.738661 | 1.011229  | -1.273615 |
| H  | -2.430549 | 0.288114  | 1.346955  |
| C  | -1.977545 | 2.151548  | -0.938056 |
| H  | -2.290476 | 3.090015  | -1.394404 |
| C  | -0.680365 | 1.808390  | -0.943724 |
| O  | -4.011836 | 2.087330  | 0.384621  |
| H  | -3.478930 | 2.523607  | 1.069262  |
| Br | -4.176590 | -1.201821 | 0.448604  |
| C  | -1.015465 | -1.901431 | 0.368961  |
| H  | -1.820047 | -2.627017 | 0.228075  |
| H  | -0.887609 | -1.781633 | 1.449797  |
| H  | -0.102332 | -2.341132 | -0.044547 |
| C  | -1.673106 | -0.944053 | -1.828582 |
| H  | -2.605900 | -1.513968 | -1.880163 |
| H  | -0.885371 | -1.573997 | -2.252068 |
| H  | -1.775902 | -0.061014 | -2.464322 |
| C  | 0.308521  | 2.719403  | -1.639401 |
| H  | -0.162075 | 3.678208  | -1.876520 |
| H  | 0.649831  | 2.283131  | -2.587640 |
| H  | 1.209475  | 2.920215  | -1.051127 |
| C  | 0.076459  | 0.878223  | 1.266509  |
| H  | -0.674801 | 1.588731  | 1.622273  |
| H  | -0.025003 | -0.013113 | 1.894230  |
| C  | 1.118013  | -0.048733 | -0.861216 |
| H  | 1.633057  | 0.710554  | -1.451931 |
| H  | 0.904811  | -0.868226 | -1.547781 |
| C  | 1.459597  | 1.503826  | 1.512477  |
| H  | 1.530175  | 2.451371  | 0.977367  |
| H  | 1.559769  | 1.746865  | 2.576472  |
| C  | 2.096384  | -0.539841 | 0.204424  |
| H  | 1.616148  | -1.260724 | 0.866800  |
| C  | 2.650496  | 0.582958  | 1.099656  |
| Cl | 3.857439  | 1.617345  | 0.147317  |
| C  | 3.397453  | 0.027138  | 2.310985  |
| H  | 2.699213  | -0.543063 | 2.938032  |
| H  | 3.812894  | 0.840210  | 2.912295  |
| H  | 4.206989  | -0.637771 | 2.001254  |
| Br | 3.519869  | -1.637282 | -0.639205 |

SCF Energy (PCM/mPW1PW91/6-31+G\*\*) =  
-6264.56092517

Number of imaginary frequencies = 0

## 1e\_C008

## B3LYP/6-31G\* Geometry

|    |           |           |           |
|----|-----------|-----------|-----------|
| C  | 1.515531  | -0.541546 | 1.091297  |
| C  | 3.469872  | -0.410580 | -0.645297 |
| C  | 0.483567  | -1.016345 | -0.042221 |
| C  | 2.720435  | 0.253842  | 0.517424  |
| H  | 3.977490  | 0.372020  | -1.223876 |
| H  | 3.420736  | 0.449770  | 1.330973  |
| C  | 2.548296  | -1.167186 | -1.541995 |
| H  | 3.011132  | -1.527641 | -2.458471 |
| C  | 1.265005  | -1.468433 | -1.302727 |
| O  | 4.453135  | -1.340467 | -0.158562 |
| H  | 5.215332  | -0.824627 | 0.150965  |
| Br | 2.293568  | 2.144099  | -0.059230 |
| C  | 2.153928  | -1.783017 | 1.784018  |
| H  | 2.993757  | -1.473622 | 2.414824  |
| H  | 2.536148  | -2.513711 | 1.069610  |
| H  | 1.424999  | -2.269791 | 2.439197  |
| C  | 0.910849  | 0.317152  | 2.224786  |
| H  | 1.700085  | 0.552629  | 2.949637  |
| H  | 0.129180  | -0.212833 | 2.773535  |
| H  | 0.519488  | 1.270572  | 1.867096  |
| C  | 0.541301  | -2.290037 | -2.356199 |
| H  | 0.452814  | -3.342038 | -2.057367 |
| H  | 1.096410  | -2.266801 | -3.298162 |
| H  | -0.473532 | -1.932569 | -2.559269 |
| C  | -0.406009 | -2.220209 | 0.417851  |
| H  | -0.831092 | -2.680576 | -0.474609 |
| H  | 0.201093  | -2.996689 | 0.888384  |
| C  | -0.499787 | 0.110436  | -0.538234 |
| H  | -0.890372 | -0.179822 | -1.516795 |
| H  | 0.044900  | 1.040874  | -0.689793 |
| C  | -1.603209 | -1.891140 | 1.318744  |
| H  | -2.174648 | -2.807817 | 1.503209  |
| H  | -1.287746 | -1.524818 | 2.302585  |
| C  | -1.712464 | 0.387579  | 0.355033  |
| H  | -1.421724 | 0.853794  | 1.295071  |
| C  | -2.558325 | -0.837536 | 0.722601  |
| Cl | -3.323567 | -1.563102 | -0.803860 |
| C  | -3.703032 | -0.514058 | 1.679942  |
| H  | -3.295925 | -0.087189 | 2.605384  |
| H  | -4.256940 | -1.422411 | 1.933178  |
| H  | -4.389490 | 0.210911  | 1.238771  |
| Br | -2.795920 | 1.828339  | -0.502487 |

SCF Energy (PCM/mPW1PW91/6-31+G\*\*) =  
-6264.56070642

Number of imaginary frequencies = 0

## 1e\_C009

## B3LYP/6-31G\* Geometry

|    |           |           |           |
|----|-----------|-----------|-----------|
| C  | 1.515638  | -0.541572 | 1.091216  |
| C  | 3.469640  | -0.410473 | -0.645765 |
| C  | 0.483569  | -1.016506 | -0.042059 |
| C  | 2.720410  | 0.253827  | 0.517184  |
| H  | 3.976626  | 0.372272  | -1.224700 |
| H  | 3.420926  | 0.449719  | 1.330552  |
| C  | 2.548090  | -1.167637 | -1.541996 |
| H  | 3.010933  | -1.528430 | -2.458338 |
| C  | 1.264855  | -1.468967 | -1.302496 |
| O  | 4.453472  | -1.339818 | -0.159297 |
| H  | 5.215421  | -0.823627 | 0.150257  |
| Br | 2.293368  | 2.144232  | -0.059027 |
| C  | 2.154267  | -1.782930 | 1.783986  |
| H  | 2.994024  | -1.473447 | 2.414848  |
| H  | 2.536612  | -2.513558 | 1.069564  |
| H  | 1.425457  | -2.269923 | 2.439164  |
| C  | 0.911011  | 0.317164  | 2.224713  |
| H  | 1.700113  | 0.552110  | 2.949870  |
| H  | 0.128926  | -0.212611 | 2.773071  |
| H  | 0.520209  | 1.270838  | 1.867095  |
| C  | 0.541186  | -2.291078 | -2.355578 |
| H  | 0.452899  | -3.342978 | -2.056323 |
| H  | 1.096142  | -2.268084 | -3.297626 |
| H  | -0.473706 | -1.933763 | -2.558656 |
| C  | -0.406133 | -2.220179 | 0.418427  |
| H  | -0.831263 | -2.680834 | -0.473876 |
| H  | 0.200961  | -2.996569 | 0.889132  |
| C  | -0.499778 | 0.110209  | -0.538331 |
| H  | -0.890346 | -0.180306 | -1.516823 |
| H  | 0.045004  | 1.040548  | -0.690161 |
| C  | -1.603255 | -1.890721 | 1.319246  |
| H  | -2.174709 | -2.807321 | 1.504097  |
| H  | -1.287822 | -1.524000 | 2.302930  |
| C  | -1.712410 | 0.387635  | 0.354876  |
| H  | -1.421619 | 0.854030  | 1.294810  |
| C  | -2.558377 | -0.837327 | 0.722669  |
| Cl | -3.323486 | -1.563313 | -0.803488 |
| C  | -3.703060 | -0.513545 | 1.679953  |
| H  | -3.296003 | -0.086334 | 2.605264  |
| H  | -4.256906 | -1.421834 | 1.933524  |
| H  | -4.389605 | 0.211226  | 1.238550  |
| Br | -2.795788 | 1.828350  | -0.502939 |

SCF Energy (PCM/mPW1PW91/6-31+G\*\*) =  
-6264.56070525

Number of imaginary frequencies = 0

## 1e\_C010

## B3LYP/6-31G\* Geometry

|    |           |           |           |
|----|-----------|-----------|-----------|
| C  | 1.526912  | -0.339815 | 0.708373  |
| C  | 2.860558  | 1.486180  | -0.514725 |
| C  | 0.137738  | 0.211353  | 0.070193  |
| C  | 2.626738  | -0.004006 | -0.320767 |
| H  | 3.396307  | 1.878527  | 0.365402  |
| H  | 2.420800  | -0.467332 | -1.285150 |
| C  | 1.545914  | 2.195100  | -0.631454 |
| H  | 1.632374  | 3.224100  | -0.974493 |
| C  | 0.337979  | 1.698991  | -0.325006 |
| O  | 3.618686  | 1.755108  | -1.688296 |
| H  | 4.483458  | 1.328700  | -1.555879 |
| Br | 4.431682  | -0.799859 | 0.133850  |
| C  | 1.530184  | -1.863323 | 0.965233  |
| H  | 2.451654  | -2.137247 | 1.484222  |
| H  | 1.501707  | -2.454098 | 0.044834  |
| H  | 0.700735  | -2.178271 | 1.604461  |
| C  | 1.819063  | 0.356490  | 2.059629  |
| H  | 2.853367  | 0.155675  | 2.356938  |
| H  | 1.170637  | -0.030185 | 2.851537  |
| H  | 1.679229  | 1.439279  | 2.009506  |
| C  | -0.843622 | 2.628955  | -0.465640 |
| H  | -0.507216 | 3.601523  | -0.836749 |
| H  | -1.358749 | 2.793083  | 0.485304  |
| H  | -1.601079 | 2.250006  | -1.157854 |
| C  | -0.205528 | -0.573712 | -1.250194 |
| H  | 0.291334  | -0.082895 | -2.092224 |
| H  | 0.214099  | -1.581557 | -1.200225 |
| C  | -0.979338 | -0.001712 | 1.165446  |
| H  | -1.042522 | 0.876577  | 1.811284  |
| H  | -0.646131 | -0.809333 | 1.821244  |
| C  | -1.699450 | -0.709894 | -1.595899 |
| H  | -2.146324 | 0.259288  | -1.835899 |
| H  | -1.799210 | -1.335915 | -2.488958 |
| C  | -2.429779 | -0.415954 | 0.786195  |
| H  | -2.871513 | -0.925738 | 1.642504  |
| C  | -2.492646 | -1.336482 | -0.448028 |
| Cl | -4.232205 | -1.573916 | -1.016019 |
| C  | -2.011088 | -2.746521 | -0.070331 |
| H  | -0.994869 | -2.736113 | 0.329460  |
| H  | -2.023260 | -3.392958 | -0.952763 |
| H  | -2.671899 | -3.185405 | 0.682477  |
| Br | -3.645304 | 1.163062  | 0.633909  |

SCF Energy (PCM/mPW1PW91/6-31+G\*\*) =  
-6264.55442026

Number of imaginary frequencies = 0

## 1e\_C011

## B3LYP/6-31G\* Geometry

|    |           |           |           |
|----|-----------|-----------|-----------|
| C  | -1.592487 | 0.374004  | 1.159937  |
| C  | -3.403880 | 0.551909  | -0.709193 |
| C  | -0.493728 | 1.034933  | 0.206112  |
| C  | -2.756232 | -0.302200 | 0.386071  |
| H  | -3.809642 | -0.113479 | -1.482137 |
| H  | -3.532923 | -0.580489 | 1.097359  |
| C  | -2.444929 | 1.515607  | -1.337464 |
| H  | -2.845907 | 2.060096  | -2.194105 |
| C  | -1.188412 | 1.778285  | -0.950328 |
| O  | -4.504136 | 1.237568  | -0.076424 |
| H  | -4.779969 | 1.955058  | -0.669116 |
| Br | -2.323536 | -2.097361 | -0.416796 |
| C  | -2.284573 | 1.481649  | 2.011686  |
| H  | -3.116378 | 1.053158  | 2.579569  |
| H  | -2.692686 | 2.285132  | 1.397050  |
| H  | -1.584739 | 1.909643  | 2.734558  |
| C  | -1.008053 | -0.651500 | 2.155822  |
| H  | -1.818696 | -1.059816 | 2.770374  |
| H  | -0.295547 | -0.185367 | 2.844070  |
| H  | -0.523760 | -1.497131 | 1.662781  |
| C  | -0.410923 | 2.815722  | -1.733355 |
| H  | -0.131525 | 3.674280  | -1.110758 |
| H  | -1.012732 | 3.196134  | -2.563840 |
| H  | 0.515522  | 2.411371  | -2.157753 |
| C  | 0.390211  | 2.014820  | 1.059930  |
| H  | -0.105565 | 2.986711  | 1.151682  |
| H  | 0.458012  | 1.627430  | 2.081349  |
| C  | 0.474084  | -0.023238 | -0.449917 |
| H  | 0.787291  | 0.321713  | -1.440225 |
| H  | -0.047604 | -0.963505 | -0.609946 |
| C  | 1.825240  | 2.253636  | 0.550224  |
| H  | 1.801441  | 2.774802  | -0.404661 |
| H  | 2.336282  | 2.925155  | 1.250163  |
| C  | 1.731575  | -0.248417 | 0.383767  |
| H  | 1.474907  | -0.451766 | 1.422658  |
| C  | 2.683292  | 0.959234  | 0.393875  |
| Cl | 3.575965  | 1.083405  | -1.227550 |
| C  | 3.750270  | 0.831650  | 1.479433  |
| H  | 3.266051  | 0.828343  | 2.465066  |
| H  | 4.443904  | 1.675865  | 1.440810  |
| H  | 4.312471  | -0.098371 | 1.366445  |
| Br | 2.623957  | -1.941781 | -0.148668 |

SCF Energy (PCM/mPW1PW91/6-31+G\*\*) =  
-6264.55436897

Number of imaginary frequencies = 0

## 1e\_C012

## B3LYP/6-31G\* Geometry

|    |           |           |           |
|----|-----------|-----------|-----------|
| C  | -1.664357 | -0.657864 | 1.209611  |
| C  | -2.312784 | 1.513795  | -0.178024 |
| C  | -0.174484 | -0.117238 | 0.937314  |
| C  | -2.683524 | 0.079316  | 0.286265  |
| H  | -1.939135 | 1.460359  | -1.210416 |
| H  | -3.639354 | 0.145277  | 0.804396  |
| C  | -1.251069 | 2.112616  | 0.692678  |
| H  | -1.346751 | 3.180912  | 0.871004  |
| C  | -0.227245 | 1.411957  | 1.199295  |
| O  | -3.456814 | 2.360856  | -0.148691 |
| H  | -4.050035 | 2.053173  | -0.853781 |
| Br | -3.223496 | -0.928344 | -1.383352 |
| C  | -2.103215 | -0.309286 | 2.661399  |
| H  | -3.097489 | -0.727489 | 2.855215  |
| H  | -2.149411 | 0.766580  | 2.838817  |
| H  | -1.418722 | -0.749529 | 3.393372  |
| C  | -1.817677 | -2.191622 | 1.093193  |
| H  | -2.876341 | -2.460070 | 1.163270  |
| H  | -1.303547 | -2.698771 | 1.914706  |
| H  | -1.455244 | -2.602007 | 0.148454  |
| C  | 0.773975  | 2.123271  | 2.081599  |
| H  | 1.757613  | 2.189507  | 1.607033  |
| H  | 0.902375  | 1.630235  | 3.052246  |
| H  | 0.435671  | 3.145697  | 2.275660  |
| C  | 0.830637  | -0.857366 | 1.867898  |
| H  | 0.722157  | -0.511195 | 2.899763  |
| H  | 0.573292  | -1.919549 | 1.885773  |
| C  | 0.212567  | -0.430122 | -0.549595 |
| H  | -0.320208 | 0.226138  | -1.237822 |
| H  | -0.118967 | -1.444013 | -0.794669 |
| C  | 2.320307  | -0.748393 | 1.481915  |
| H  | 2.683607  | 0.274700  | 1.593692  |
| H  | 2.912285  | -1.372575 | 2.160358  |
| C  | 1.701291  | -0.375943 | -0.925808 |
| H  | 1.831580  | -0.738056 | -1.946354 |
| C  | 2.571553  | -1.198085 | 0.039846  |
| Cl | 4.361771  | -0.956183 | -0.339016 |
| C  | 2.317869  | -2.699708 | -0.176073 |
| H  | 2.965367  | -3.282159 | 0.485198  |
| H  | 1.280089  | -2.970796 | 0.039245  |
| H  | 2.540132  | -2.984475 | -1.208608 |
| Br | 2.299278  | 1.523327  | -1.077015 |

SCF Energy (PCM/mPW1PW91/6-31+G\*\*) =  
-6264.56070642

Number of imaginary frequencies = 0

## 1e\_C013

## B3LYP/6-31G\* Geometry

|    |           |           |           |
|----|-----------|-----------|-----------|
| C  | -1.592487 | 0.374004  | 1.159937  |
| C  | -3.403880 | 0.551909  | -0.709193 |
| C  | -0.493728 | 1.034933  | 0.206112  |
| C  | -2.756232 | -0.302200 | 0.386071  |
| H  | -3.809642 | -0.113479 | -1.482137 |
| H  | -3.532923 | -0.580489 | 1.097359  |
| C  | -2.444929 | 1.515607  | -1.337464 |
| H  | -2.845907 | 2.060096  | -2.194105 |
| C  | -1.188412 | 1.778285  | -0.950328 |
| O  | -4.504136 | 1.237568  | -0.076424 |
| H  | -4.779969 | 1.955058  | -0.669116 |
| Br | -2.323536 | -2.097361 | -0.416796 |
| C  | -2.284573 | 1.481649  | 2.011686  |
| H  | -3.116378 | 1.053158  | 2.579569  |
| H  | -2.692686 | 2.285132  | 1.397050  |
| H  | -1.584739 | 1.909643  | 2.734558  |
| C  | -1.008053 | -0.651500 | 2.155822  |
| H  | -1.818696 | -1.059816 | 2.770374  |
| H  | -0.295547 | -0.185367 | 2.844070  |
| H  | -0.523760 | -1.497131 | 1.662781  |
| C  | -0.410923 | 2.815722  | -1.733355 |
| H  | -0.131525 | 3.674280  | -1.110758 |
| H  | -1.012732 | 3.196134  | -2.563840 |
| H  | 0.515522  | 2.411371  | -2.157753 |
| C  | 0.390211  | 2.014820  | 1.059930  |
| H  | -0.105565 | 2.986711  | 1.151682  |
| H  | 0.458012  | 1.627430  | 2.081349  |
| C  | 0.474084  | -0.023238 | -0.449917 |
| H  | 0.787291  | 0.321713  | -1.440225 |
| H  | -0.047604 | -0.963505 | -0.609946 |
| C  | 1.825240  | 2.253636  | 0.550224  |
| H  | 1.801441  | 2.774802  | -0.404661 |
| H  | 2.336282  | 2.925155  | 1.250163  |
| C  | 1.731575  | -0.248417 | 0.383767  |
| H  | 1.474907  | -0.451766 | 1.422658  |
| C  | 2.683292  | 0.959234  | 0.393875  |
| Cl | 3.575965  | 1.083405  | -1.227550 |
| C  | 3.750270  | 0.831650  | 1.479433  |
| H  | 3.266051  | 0.828343  | 2.465066  |
| H  | 4.443904  | 1.675865  | 1.440810  |
| H  | 4.312471  | -0.098371 | 1.366445  |
| Br | 2.623957  | -1.941781 | -0.148668 |

SCF Energy (PCM/mPW1PW91/6-31+G\*\*) =  
-6264.55236851

Number of imaginary frequencies = 0

## 1e\_C014

## B3LYP/6-31G\* Geometry

|    |           |           |           |
|----|-----------|-----------|-----------|
| C  | -1.536287 | -0.329158 | -0.709447 |
| C  | -2.85312  | 1.464836  | 0.586219  |
| C  | -0.142764 | 0.21681   | -0.080235 |
| C  | -2.642524 | -0.015964 | 0.326873  |
| H  | -3.48136  | 1.881787  | -0.215557 |
| H  | -2.438058 | -0.51289  | 1.274925  |
| C  | -1.540597 | 2.195981  | 0.617542  |
| H  | -1.618442 | 3.237432  | 0.93066   |
| C  | -0.334039 | 1.708598  | 0.294713  |
| O  | -3.538831 | 1.575492  | 1.83818   |
| H  | -3.939295 | 2.45668   | 1.883251  |
| Br | -4.4311   | -0.788242 | -0.168398 |
| C  | -1.534728 | -1.851645 | -0.977219 |
| H  | -2.464526 | -2.127978 | -1.478629 |
| H  | -1.485845 | -2.447374 | -0.060713 |
| H  | -0.715465 | -2.158435 | -1.633172 |
| C  | -1.838323 | 0.375054  | -2.053947 |
| H  | -2.864486 | 0.14895   | -2.359899 |
| H  | -1.173204 | 0.017735  | -2.846029 |
| H  | -1.730107 | 1.460694  | -1.988566 |
| C  | 0.84376   | 2.648364  | 0.389667  |
| H  | 0.508848  | 3.629852  | 0.738871  |
| H  | 1.344634  | 2.788519  | -0.572849 |
| H  | 1.613235  | 2.291412  | 1.080419  |
| C  | 0.193108  | -0.555002 | 1.249075  |
| H  | -0.307631 | -0.0553   | 2.083541  |
| H  | -0.227623 | -1.562683 | 1.207262  |
| C  | 0.975408  | -0.011642 | -1.171189 |
| H  | 1.04534   | 0.860981  | -1.82382  |
| H  | 0.63968   | -0.821665 | -1.822206 |
| C  | 1.685579  | -0.688457 | 1.599925  |
| H  | 2.134291  | 0.283784  | 1.824899  |
| H  | 1.783406  | -1.300881 | 2.502532  |
| C  | 2.422672  | -0.42988  | -0.783993 |
| H  | 2.864159  | -0.952281 | -1.632785 |
| C  | 2.477822  | -1.334408 | 0.462093  |
| Cl | 4.21496   | -1.574838 | 1.037057  |
| C  | 1.98827   | -2.746024 | 0.100574  |
| H  | 0.975046  | -2.733432 | -0.306801 |
| H  | 1.989301  | -3.38025  | 0.99193   |
| H  | 2.651119  | -3.200039 | -0.641367 |
| Br | 3.647325  | 1.144782  | -0.648037 |

SCF Energy (PCM/mPW1PW91/6-31+G\*\*) =  
-6264.55147048

Number of imaginary frequencies = 0

## 1e\_C015

## B3LYP/6-31G\* Geometry

|    |           |           |           |
|----|-----------|-----------|-----------|
| C  | -1.592487 | 0.374004  | 1.159937  |
| C  | -3.403880 | 0.551909  | -0.709193 |
| C  | -0.493728 | 1.034933  | 0.206112  |
| C  | -2.756232 | -0.302200 | 0.386071  |
| H  | -3.809642 | -0.113479 | -1.482137 |
| H  | -3.532923 | -0.580489 | 1.097359  |
| C  | -2.444929 | 1.515607  | -1.337464 |
| H  | -2.845907 | 2.060096  | -2.194105 |
| C  | -1.188412 | 1.778285  | -0.950328 |
| O  | -4.504136 | 1.237568  | -0.076424 |
| H  | -4.779969 | 1.955058  | -0.669116 |
| Br | -2.323536 | -2.097361 | -0.416796 |
| C  | -2.284573 | 1.481649  | 2.011686  |
| H  | -3.116378 | 1.053158  | 2.579569  |
| H  | -2.692686 | 2.285132  | 1.397050  |
| H  | -1.584739 | 1.909643  | 2.734558  |
| C  | -1.008053 | -0.651500 | 2.155822  |
| H  | -1.818696 | -1.059816 | 2.770374  |
| H  | -0.295547 | -0.185367 | 2.844070  |
| H  | -0.523760 | -1.497131 | 1.662781  |
| C  | -0.410923 | 2.815722  | -1.733355 |
| H  | -0.131525 | 3.674280  | -1.110758 |
| H  | -1.012732 | 3.196134  | -2.563840 |
| H  | 0.515522  | 2.411371  | -2.157753 |
| C  | 0.390211  | 2.014820  | 1.059930  |
| H  | -0.105565 | 2.986711  | 1.151682  |
| H  | 0.458012  | 1.627430  | 2.081349  |
| C  | 0.474084  | -0.023238 | -0.449917 |
| H  | 0.787291  | 0.321713  | -1.440225 |
| H  | -0.047604 | -0.963505 | -0.609946 |
| C  | 1.825240  | 2.253636  | 0.550224  |
| H  | 1.801441  | 2.774802  | -0.404661 |
| H  | 2.336282  | 2.925155  | 1.250163  |
| C  | 1.731575  | -0.248417 | 0.383767  |
| H  | 1.474907  | -0.451766 | 1.422658  |
| C  | 2.683292  | 0.959234  | 0.393875  |
| Cl | 3.575965  | 1.083405  | -1.227550 |
| C  | 3.750270  | 0.831650  | 1.479433  |
| H  | 3.266051  | 0.828343  | 2.465066  |
| H  | 4.443904  | 1.675865  | 1.440810  |
| H  | 4.312471  | -0.098371 | 1.366445  |
| Br | 2.623957  | -1.941781 | -0.148668 |

SCF Energy (PCM/mPW1PW91/6-31+G\*\*) =  
-6264.55537662

Number of imaginary frequencies = 0

## 1e\_C016

## B3LYP/6-31G\* Geometry

|    |           |           |           |
|----|-----------|-----------|-----------|
| C  | -1.539668 | -0.427539 | -0.658248 |
| C  | -2.820316 | 1.553427  | 0.364449  |
| C  | -0.156056 | 0.089449  | -0.007168 |
| C  | -2.665195 | 0.040982  | 0.289340  |
| H  | -3.249408 | 1.918140  | -0.583019 |
| H  | -2.535552 | -0.349658 | 1.297965  |
| C  | -1.471654 | 2.176449  | 0.572383  |
| H  | -1.507428 | 3.214553  | 0.896740  |
| C  | -0.287343 | 1.577285  | 0.385560  |
| O  | -3.657049 | 1.946712  | 1.445604  |
| H  | -4.529473 | 1.552051  | 1.271471  |
| Br | -4.481074 | -0.702604 | -0.202428 |
| C  | -1.576448 | -1.965280 | -0.787423 |
| H  | -2.487458 | -2.270276 | -1.307829 |
| H  | -1.578625 | -2.469882 | 0.183824  |
| H  | -0.728795 | -2.344383 | -1.367115 |
| C  | -1.761756 | 0.180740  | -2.064958 |
| H  | -2.802662 | 0.028307  | -2.367026 |
| H  | -1.132468 | -0.303145 | -2.816885 |
| H  | -1.549787 | 1.253237  | -2.088506 |
| C  | 0.971907  | 2.371169  | 0.647938  |
| H  | 0.721049  | 3.405113  | 0.901846  |
| H  | 1.650399  | 2.389556  | -0.211130 |
| H  | 1.549723  | 1.951598  | 1.477985  |
| C  | 0.187711  | -0.718745 | 1.295518  |
| H  | 0.543184  | -0.028525 | 2.064274  |
| H  | -0.718208 | -1.168852 | 1.709930  |
| C  | 0.964868  | -0.110914 | -1.092118 |
| H  | 1.050430  | 0.789732  | -1.701293 |
| H  | 0.612718  | -0.881242 | -1.780826 |
| C  | 1.244150  | -1.817167 | 1.129891  |
| H  | 1.381013  | -2.345530 | 2.079900  |
| H  | 0.915899  | -2.567333 | 0.397842  |
| C  | 2.395840  | -0.593539 | -0.713684 |
| H  | 2.662539  | -1.354726 | -1.447402 |
| C  | 2.604808  | -1.284018 | 0.661429  |
| Cl | 3.237616  | -0.142367 | 1.972753  |
| C  | 3.656088  | -2.390120 | 0.542797  |
| H  | 3.302575  | -3.164261 | -0.149889 |
| H  | 3.842686  | -2.854765 | 1.514352  |
| H  | 4.596496  | -1.982490 | 0.160682  |
| Br | 3.787545  | 0.769354  | -1.129908 |

SCF Energy (PCM/mPW1PW91/6-31+G\*\*) =  
-6264.55550158

Number of imaginary frequencies = 0

## 1e\_C017

## B3LYP/6-31G\* Geometry

|    |           |           |           |
|----|-----------|-----------|-----------|
| C  | -1.592487 | 0.374004  | 1.159937  |
| C  | -3.403880 | 0.551909  | -0.709193 |
| C  | -0.493728 | 1.034933  | 0.206112  |
| C  | -2.756232 | -0.302200 | 0.386071  |
| H  | -3.809642 | -0.113479 | -1.482137 |
| H  | -3.532923 | -0.580489 | 1.097359  |
| C  | -2.444929 | 1.515607  | -1.337464 |
| H  | -2.845907 | 2.060096  | -2.194105 |
| C  | -1.188412 | 1.778285  | -0.950328 |
| O  | -4.504136 | 1.237568  | -0.076424 |
| H  | -4.779969 | 1.955058  | -0.669116 |
| Br | -2.323536 | -2.097361 | -0.416796 |
| C  | -2.284573 | 1.481649  | 2.011686  |
| H  | -3.116378 | 1.053158  | 2.579569  |
| H  | -2.692686 | 2.285132  | 1.397050  |
| H  | -1.584739 | 1.909643  | 2.734558  |
| C  | -1.008053 | -0.651500 | 2.155822  |
| H  | -1.818696 | -1.059816 | 2.770374  |
| H  | -0.295547 | -0.185367 | 2.844070  |
| H  | -0.523760 | -1.497131 | 1.662781  |
| C  | -0.410923 | 2.815722  | -1.733355 |
| H  | -0.131525 | 3.674280  | -1.110758 |
| H  | -1.012732 | 3.196134  | -2.563840 |
| H  | 0.515522  | 2.411371  | -2.157753 |
| C  | 0.390211  | 2.014820  | 1.059930  |
| H  | -0.105565 | 2.986711  | 1.151682  |
| H  | 0.458012  | 1.627430  | 2.081349  |
| C  | 0.474084  | -0.023238 | -0.449917 |
| H  | 0.787291  | 0.321713  | -1.440225 |
| H  | -0.047604 | -0.963505 | -0.609946 |
| C  | 1.825240  | 2.253636  | 0.550224  |
| H  | 1.801441  | 2.774802  | -0.404661 |
| H  | 2.336282  | 2.925155  | 1.250163  |
| C  | 1.731575  | -0.248417 | 0.383767  |
| H  | 1.474907  | -0.451766 | 1.422658  |
| C  | 2.683292  | 0.959234  | 0.393875  |
| Cl | 3.575965  | 1.083405  | -1.227550 |
| C  | 3.750270  | 0.831650  | 1.479433  |
| H  | 3.266051  | 0.828343  | 2.465066  |
| H  | 4.443904  | 1.675865  | 1.440810  |
| H  | 4.312471  | -0.098371 | 1.366445  |
| Br | 2.623957  | -1.941781 | -0.148668 |

SCF Energy (PCM/mPW1PW91/6-31+G\*\*) =  
-6264.55730779

Number of imaginary frequencies = 0

## 1e\_C018

## B3LYP/6-31G\* Geometry

|    |           |           |           |
|----|-----------|-----------|-----------|
| C  | -1.737210 | -0.707511 | 1.112076  |
| C  | -2.903559 | 1.375861  | 0.021940  |
| C  | -0.301729 | -0.019752 | 0.868569  |
| C  | -2.823801 | -0.161526 | 0.147883  |
| H  | -3.154929 | 1.631851  | -1.010469 |
| H  | -3.800665 | -0.512795 | 0.476695  |
| C  | -1.651083 | 2.073233  | 0.458267  |
| H  | -1.754191 | 3.157064  | 0.487626  |
| C  | -0.512030 | 1.517412  | 0.901585  |
| O  | -4.017408 | 1.874888  | 0.781042  |
| H  | -3.728770 | 1.953533  | 1.704253  |
| Br | -2.775027 | -0.946896 | -1.713437 |
| C  | -2.237885 | -0.361847 | 2.547291  |
| H  | -3.276813 | -0.683792 | 2.677402  |
| H  | -2.177656 | 0.706361  | 2.769718  |
| H  | -1.641754 | -0.888975 | 3.298050  |
| C  | -1.741087 | -2.252277 | 1.036700  |
| H  | -2.751476 | -2.614232 | 1.260181  |
| H  | -1.073147 | -2.700740 | 1.777616  |
| H  | -1.485306 | -2.641054 | 0.050246  |
| C  | 0.525008  | 2.445871  | 1.500551  |
| H  | 0.745698  | 2.187225  | 2.543367  |
| H  | 0.152221  | 3.474363  | 1.492665  |
| H  | 1.465767  | 2.431623  | 0.947571  |
| C  | 0.672567  | -0.487181 | 1.997438  |
| H  | 0.460743  | 0.056117  | 2.923359  |
| H  | 0.471339  | -1.537253 | 2.225075  |
| C  | 0.264351  | -0.477833 | -0.526397 |
| H  | -0.219029 | 0.081294  | -1.326934 |
| H  | -0.022694 | -1.520249 | -0.684473 |
| C  | 2.181836  | -0.360166 | 1.704433  |
| H  | 2.490882  | 0.685121  | 1.650274  |
| H  | 2.741616  | -0.813365 | 2.530104  |
| C  | 1.781981  | -0.452021 | -0.776554 |
| H  | 1.995577  | -1.008949 | -1.689359 |
| C  | 2.576336  | -1.050299 | 0.396555  |
| Cl | 4.389259  | -0.814342 | 0.146852  |
| C  | 2.372018  | -2.574202 | 0.436212  |
| H  | 2.721134  | -3.033953 | -0.492734 |
| H  | 1.319307  | -2.836980 | 0.574503  |
| H  | 2.942973  | -3.002656 | 1.264851  |
| Br | 2.383792  | 1.381998  | -1.290954 |

SCF Energy (PCM/mPW1PW91/6-31+G\*\*) =  
-6264.55375875

Number of imaginary frequencies = 0

## 1f\_C001

## B3LYP/6-31G\* Geometry

|    |           |           |           |
|----|-----------|-----------|-----------|
| C  | -1.592487 | 0.374004  | 1.159937  |
| C  | -3.403880 | 0.551909  | -0.709193 |
| C  | -0.493728 | 1.034933  | 0.206112  |
| C  | -2.756232 | -0.302200 | 0.386071  |
| H  | -3.809642 | -0.113479 | -1.482137 |
| H  | -3.532923 | -0.580489 | 1.097359  |
| C  | -2.444929 | 1.515607  | -1.337464 |
| H  | -2.845907 | 2.060096  | -2.194105 |
| C  | -1.188412 | 1.778285  | -0.950328 |
| O  | -4.504136 | 1.237568  | -0.076424 |
| H  | -4.779969 | 1.955058  | -0.669116 |
| Br | -2.323536 | -2.097361 | -0.416796 |
| C  | -2.284573 | 1.481649  | 2.011686  |
| H  | -3.116378 | 1.053158  | 2.579569  |
| H  | -2.692686 | 2.285132  | 1.397050  |
| H  | -1.584739 | 1.909643  | 2.734558  |
| C  | -1.008053 | -0.651500 | 2.155822  |
| H  | -1.818696 | -1.059816 | 2.770374  |
| H  | -0.295547 | -0.185367 | 2.844070  |
| H  | -0.523760 | -1.497131 | 1.662781  |
| C  | -0.410923 | 2.815722  | -1.733355 |
| H  | -0.131525 | 3.674280  | -1.110758 |
| H  | -1.012732 | 3.196134  | -2.563840 |
| H  | 0.515522  | 2.411371  | -2.157753 |
| C  | 0.390211  | 2.014820  | 1.059930  |
| H  | -0.105565 | 2.986711  | 1.151682  |
| H  | 0.458012  | 1.627430  | 2.081349  |
| C  | 0.474084  | -0.023238 | -0.449917 |
| H  | 0.787291  | 0.321713  | -1.440225 |
| H  | -0.047604 | -0.963505 | -0.609946 |
| C  | 1.825240  | 2.253636  | 0.550224  |
| H  | 1.801441  | 2.774802  | -0.404661 |
| H  | 2.336282  | 2.925155  | 1.250163  |
| C  | 1.731575  | -0.248417 | 0.383767  |
| H  | 1.474907  | -0.451766 | 1.422658  |
| C  | 2.683292  | 0.959234  | 0.393875  |
| Cl | 3.575965  | 1.083405  | -1.227550 |
| C  | 3.750270  | 0.831650  | 1.479433  |
| H  | 3.266051  | 0.828343  | 2.465066  |
| H  | 4.443904  | 1.675865  | 1.440810  |
| H  | 4.312471  | -0.098371 | 1.366445  |
| Br | 2.623957  | -1.941781 | -0.148668 |

SCF Energy (PCM/mPW1PW91/6-31+G\*\*) =  
-6264.56935769

Number of imaginary frequencies = 0

## 1f\_C002

## B3LYP/6-31G\* Geometry

|    |           |           |           |
|----|-----------|-----------|-----------|
| C  | 1.589682  | 0.566071  | -0.815945 |
| C  | 2.805789  | 0.464083  | 1.458930  |
| C  | 0.194306  | 0.906050  | -0.075916 |
| C  | 2.436656  | -0.272344 | 0.173891  |
| H  | 3.643410  | 1.141014  | 1.254105  |
| H  | 1.916455  | -1.199992 | 0.419827  |
| C  | 1.639257  | 1.265441  | 1.964450  |
| H  | 1.802514  | 1.696219  | 2.951633  |
| C  | 0.491978  | 1.515719  | 1.315199  |
| O  | 3.311675  | -0.409230 | 2.465107  |
| H  | 2.573094  | -0.961191 | 2.770888  |
| Br | 4.135774  | -0.955146 | -0.639876 |
| C  | 2.328647  | 1.872972  | -1.187722 |
| H  | 3.356601  | 1.639158  | -1.480802 |
| H  | 2.362263  | 2.584119  | -0.357530 |
| H  | 1.847573  | 2.367180  | -2.036951 |
| C  | 1.396151  | -0.252012 | -2.115230 |
| H  | 2.334431  | -0.272885 | -2.673745 |
| H  | 0.636662  | 0.184254  | -2.770517 |
| H  | 1.125057  | -1.294476 | -1.922751 |
| C  | -0.509549 | 2.426318  | 1.996846  |
| H  | -0.705548 | 3.330676  | 1.408303  |
| H  | -0.122920 | 2.748812  | 2.967786  |
| H  | -1.478316 | 1.947385  | 2.175581  |
| C  | -0.619386 | 1.889756  | -0.977201 |
| H  | -0.214518 | 2.902232  | -0.876703 |
| H  | -0.462516 | 1.616176  | -2.023417 |
| C  | -0.629730 | -0.419021 | 0.109691  |
| H  | -0.212357 | -1.003496 | 0.933127  |
| H  | -0.536058 | -1.035880 | -0.785695 |
| C  | -2.141509 | 1.960413  | -0.737078 |
| H  | -2.366410 | 2.478399  | 0.196380  |
| H  | -2.597949 | 2.556156  | -1.535704 |
| C  | -2.128374 | -0.243406 | 0.382639  |
| H  | -2.317032 | 0.203989  | 1.356740  |
| C  | -2.832799 | 0.582860  | -0.701670 |
| Cl | -4.576635 | 0.887804  | -0.164422 |
| C  | -2.899846 | -0.086653 | -2.073904 |
| H  | -3.419465 | -1.044685 | -2.012729 |
| H  | -1.893425 | -0.267270 | -2.466862 |
| H  | -3.430022 | 0.560409  | -2.777837 |
| Br | -2.914624 | -2.066357 | 0.584427  |

SCF Energy (PCM/mPW1PW91/6-31+G\*\*) =  
-6264.56738028

Number of imaginary frequencies = 0



## 1f\_C003

## B3LYP/6-31G\* Geometry

|    |          |          |          |
|----|----------|----------|----------|
| C  | 1.57700  | 0.54755  | -0.83688 |
| C  | 2.81669  | 0.53239  | 1.42084  |
| C  | 0.18684  | 0.90345  | -0.09197 |
| C  | 2.41942  | -0.25167 | 0.17872  |
| H  | 3.60568  | 1.25262  | 1.14705  |
| H  | 1.91146  | -1.16777 | 0.47877  |
| C  | 1.63954  | 1.30153  | 1.94169  |
| H  | 1.79738  | 1.72983  | 2.92974  |
| C  | 0.49310  | 1.53820  | 1.28788  |
| O  | 3.28918  | -0.31824 | 2.45757  |
| H  | 4.07955  | -0.76340 | 2.10485  |
| Br | 4.13402  | -0.97711 | -0.60738 |
| C  | 2.30834  | 1.84595  | -1.25102 |
| H  | 3.33879  | 1.61090  | -1.53548 |
| H  | 2.33480  | 2.58332  | -0.44384 |
| H  | 1.82513  | 2.30880  | -2.11649 |
| C  | 1.38158  | -0.31116 | -2.10854 |
| H  | 2.31542  | -0.33779 | -2.67553 |
| H  | 0.61226  | 0.09758  | -2.77027 |
| H  | 1.12258  | -1.34983 | -1.88285 |
| C  | -0.51348 | 2.45036  | 1.96049  |
| H  | -0.12650 | 2.78669  | 2.92650  |
| H  | -1.47802 | 1.96674  | 2.14883  |
| H  | -0.71757 | 3.34649  | 1.36193  |
| C  | -0.62888 | 1.86831  | -1.01062 |
| H  | -0.22329 | 2.88258  | -0.93262 |
| H  | -0.47638 | 1.57210  | -2.05166 |
| C  | -0.63515 | -0.41849 | 0.12636  |
| H  | -0.21590 | -0.98065 | 0.96410  |
| H  | -0.54249 | -1.05649 | -0.75434 |
| C  | -2.14959 | 1.94453  | -0.76585 |
| H  | -2.36978 | 2.47937  | 0.15915  |
| H  | -2.60896 | 2.52613  | -1.57319 |
| C  | -2.13460 | -0.23881 | 0.39508  |
| H  | -2.32326 | 0.22414  | 1.36167  |
| C  | -2.84101 | 0.56824  | -0.70260 |
| Cl | -4.58357 | 0.88525  | -0.16746 |
| C  | -2.91335 | -0.12682 | -2.06187 |
| H  | -1.90856 | -0.32194 | -2.45208 |
| H  | -3.44027 | 0.50968  | -2.77788 |
| H  | -3.43857 | -1.08026 | -1.98138 |
| Br | -2.91988 | -2.05842 | 0.62626  |

SCF Energy (PCM/mPW1PW91/6-31+G\*\*) =  
-6264.56935904

Number of imaginary frequencies = 0

## 1f\_C004

## B3LYP/6-31G\* Geometry

|    |           |           |           |
|----|-----------|-----------|-----------|
| C  | 1.554806  | -0.647010 | -0.959146 |
| C  | 3.315111  | -1.037970 | 0.923564  |
| C  | 0.429105  | -0.309567 | 0.134553  |
| C  | 2.990593  | -0.396115 | -0.430689 |
| H  | 4.050965  | -0.413456 | 1.446681  |
| H  | 3.707350  | -0.773626 | -1.158920 |
| C  | 2.105833  | -1.229220 | 1.788156  |
| H  | 2.319875  | -1.669732 | 2.763744  |
| C  | 0.827290  | -0.972625 | 1.474142  |
| O  | 3.928109  | -2.305448 | 0.612305  |
| H  | 3.956024  | -2.827372 | 1.430277  |
| Br | 3.531493  | 1.542705  | -0.337942 |
| C  | 1.386963  | 0.111679  | -2.295200 |
| H  | 2.137568  | -0.252831 | -3.006175 |
| H  | 1.539320  | 1.187603  | -2.198769 |
| H  | 0.407854  | -0.066589 | -2.749390 |
| C  | 1.509743  | -2.164749 | -1.313243 |
| H  | 2.361978  | -2.427663 | -1.947620 |
| H  | 0.601815  | -2.399187 | -1.876218 |
| H  | 1.553852  | -2.803577 | -0.430189 |
| C  | -0.225768 | -1.368270 | 2.490416  |
| H  | 0.247680  | -1.814720 | 3.369883  |
| H  | -0.920323 | -2.113714 | 2.084134  |
| H  | -0.828604 | -0.524891 | 2.841935  |
| C  | 0.279087  | 1.235584  | 0.339804  |
| H  | 1.116832  | 1.610231  | 0.929814  |
| H  | 0.355221  | 1.730247  | -0.631581 |
| C  | -0.935268 | -0.871353 | -0.399479 |
| H  | -0.967414 | -1.958189 | -0.290930 |
| H  | -0.997810 | -0.677877 | -1.472570 |
| C  | -1.027578 | 1.700699  | 1.002009  |
| H  | -1.085126 | 1.363485  | 2.040859  |
| H  | -1.040146 | 2.795904  | 1.035489  |
| C  | -2.222442 | -0.311188 | 0.229590  |
| H  | -2.376526 | -0.678463 | 1.239790  |
| C  | -2.283371 | 1.219858  | 0.250097  |
| Cl | -3.742625 | 1.729982  | 1.269668  |
| C  | -2.447428 | 1.876240  | -1.119879 |
| H  | -1.618537 | 1.603643  | -1.781881 |
| H  | -2.458171 | 2.964550  | -1.014672 |
| H  | -3.378037 | 1.555427  | -1.591138 |
| Br | -3.760806 | -1.125313 | -0.753588 |

SCF Energy (PCM/mPW1PW91/6-31+G\*\*) =  
-6264.56038155

Number of imaginary frequencies = 0

## 1f\_C005

## B3LYP/6-31G\* Geometry

|    |           |           |           |
|----|-----------|-----------|-----------|
| C  | 1.550521  | -0.649456 | -0.961292 |
| C  | 3.308635  | -1.043097 | 0.930785  |
| C  | 0.425983  | -0.313183 | 0.133707  |
| C  | 2.983862  | -0.397453 | -0.430592 |
| H  | 4.027019  | -0.403731 | 1.460227  |
| H  | 3.695985  | -0.765358 | -1.169852 |
| C  | 2.099047  | -1.247108 | 1.786166  |
| H  | 2.320171  | -1.720648 | 2.740567  |
| C  | 0.823379  | -0.981753 | 1.470292  |
| O  | 3.889687  | -2.344177 | 0.742183  |
| H  | 4.815357  | -2.216882 | 0.478516  |
| Br | 3.529866  | 1.547362  | -0.340408 |
| C  | 1.380948  | 0.108641  | -2.297371 |
| H  | 2.134712  | -0.250490 | -3.007949 |
| H  | 1.526124  | 1.185519  | -2.199996 |
| H  | 0.403783  | -0.075377 | -2.753335 |
| C  | 1.512649  | -2.168226 | -1.313358 |
| H  | 2.356065  | -2.423361 | -1.963553 |
| H  | 0.598937  | -2.410217 | -1.863493 |
| H  | 1.575075  | -2.807364 | -0.431509 |
| C  | -0.231102 | -1.384147 | 2.482794  |
| H  | 0.243144  | -1.838384 | 3.357434  |
| H  | -0.926154 | -2.126186 | 2.071135  |
| H  | -0.833103 | -0.542901 | 2.841465  |
| C  | 0.278157  | 1.231608  | 0.341242  |
| H  | 1.116374  | 1.603885  | 0.932151  |
| H  | 0.352676  | 1.729829  | -0.628564 |
| C  | -0.938758 | -0.872167 | -0.402514 |
| H  | -0.971715 | -1.959127 | -0.295965 |
| H  | -1.001924 | -0.675915 | -1.475147 |
| C  | -1.027210 | 1.694908  | 1.007401  |
| H  | -1.083068 | 1.352348  | 2.044530  |
| H  | -1.039131 | 2.789962  | 1.045920  |
| C  | -2.225137 | -0.312717 | 0.228763  |
| H  | -2.378993 | -0.683842 | 1.237521  |
| C  | -2.284195 | 1.218262  | 0.254886  |
| Cl | -3.742005 | 1.726773  | 1.277460  |
| C  | -2.448904 | 1.879801  | -1.112559 |
| H  | -1.621426 | 1.607791  | -1.776590 |
| H  | -2.457489 | 2.967774  | -1.003618 |
| H  | -3.380701 | 1.562236  | -1.583654 |
| Br | -3.764791 | -1.121212 | -0.757324 |

SCF Energy (PCM/mPW1PW91/6-31+G\*\*) =  
-6264.56139646

Number of imaginary frequencies = 0

## 1f\_C006

## B3LYP/6-31G\* Geometry

|    |           |           |           |
|----|-----------|-----------|-----------|
| C  | 1.553991  | -0.647494 | -0.961376 |
| C  | 3.321639  | -1.052422 | 0.919245  |
| C  | 0.433513  | -0.298940 | 0.134010  |
| C  | 2.992741  | -0.403879 | -0.437215 |
| H  | 4.081093  | -0.445690 | 1.419285  |
| H  | 3.709197  | -0.774005 | -1.169696 |
| C  | 2.118033  | -1.209134 | 1.796144  |
| H  | 2.339509  | -1.651423 | 2.766494  |
| C  | 0.838964  | -0.947296 | 1.480108  |
| O  | 3.966609  | -2.321829 | 0.728578  |
| H  | 3.273688  | -2.985129 | 0.585895  |
| Br | 3.531283  | 1.538887  | -0.338396 |
| C  | 1.389024  | 0.101073  | -2.303273 |
| H  | 2.119841  | -0.290994 | -3.020566 |
| H  | 1.574601  | 1.172339  | -2.216400 |
| H  | 0.398880  | -0.051591 | -2.742797 |
| C  | 1.486841  | -2.167869 | -1.307987 |
| H  | 2.384621  | -2.479770 | -1.851572 |
| H  | 0.630318  | -2.376322 | -1.955309 |
| H  | 1.385796  | -2.798851 | -0.420092 |
| C  | -0.211872 | -1.325269 | 2.505997  |
| H  | 0.264559  | -1.761953 | 3.388458  |
| H  | -0.912955 | -2.072352 | 2.113827  |
| H  | -0.808458 | -0.474205 | 2.849576  |
| C  | 0.280475  | 1.248116  | 0.320211  |
| H  | 1.117460  | 1.631193  | 0.905460  |
| H  | 0.355560  | 1.731241  | -0.657241 |
| C  | -0.931207 | -0.869583 | -0.391113 |
| H  | -0.961604 | -1.955718 | -0.272671 |
| H  | -0.997376 | -0.685895 | -1.465805 |
| C  | -1.026855 | 1.718370  | 0.977772  |
| H  | -1.081273 | 1.395606  | 2.021228  |
| H  | -1.041600 | 2.813869  | 0.996168  |
| C  | -2.218457 | -0.306385 | 0.234704  |
| H  | -2.367920 | -0.661265 | 1.249991  |
| C  | -2.283563 | 1.224698  | 0.235700  |
| Cl | -3.741079 | 1.742828  | 1.252603  |
| C  | -2.453629 | 1.863529  | -1.141888 |
| H  | -1.624695 | 1.587847  | -1.802651 |
| H  | -2.469797 | 2.952892  | -1.049489 |
| H  | -3.383643 | 1.532538  | -1.607279 |
| Br | -3.755802 | -1.138056 | -0.734573 |

SCF Energy (PCM/mPW1PW91/6-31+G\*\*) =  
-6264.56188819

Number of imaginary frequencies = 0

## 1f\_C007

## B3LYP/6-31G\* Geometry

|    |           |           |           |
|----|-----------|-----------|-----------|
| C  | -1.573768 | -0.974776 | -0.399813 |
| C  | -2.689931 | 0.400583  | 1.473325  |
| C  | -0.164645 | -0.850273 | 0.370488  |
| C  | -2.353056 | 0.300113  | -0.012811 |
| H  | -3.539350 | -0.271298 | 1.681462  |
| H  | -1.822762 | 1.198380  | -0.324514 |
| C  | -1.537056 | -0.050592 | 2.323380  |
| H  | -1.682752 | 0.116965  | 3.388891  |
| C  | -0.442782 | -0.690161 | 1.887474  |
| O  | -3.037276 | 1.729363  | 1.843946  |
| H  | -3.836683 | 1.953295  | 1.336026  |
| Br | -4.102162 | 0.511398  | -1.002543 |
| C  | -2.349877 | -2.235564 | 0.052064  |
| H  | -3.386522 | -2.164370 | -0.292427 |
| H  | -2.356905 | -2.358714 | 1.137725  |
| H  | -1.924395 | -3.142495 | -0.387549 |
| C  | -1.417809 | -1.065930 | -1.931086 |
| H  | -2.404462 | -1.157648 | -2.392461 |
| H  | -0.842002 | -1.951120 | -2.215014 |
| H  | -0.942955 | -0.184485 | -2.372765 |
| C  | 0.533314  | -1.222742 | 2.916242  |
| H  | 0.273508  | -0.848019 | 3.910480  |
| H  | 1.574567  | -0.945568 | 2.719455  |
| H  | 0.508058  | -2.319416 | 2.964068  |
| C  | 0.748431  | -2.083872 | 0.060020  |
| H  | 1.309943  | -2.373357 | 0.951516  |
| H  | 0.142980  | -2.956718 | -0.198024 |
| C  | 0.604648  | 0.449754  | -0.093940 |
| H  | 0.231565  | 1.315974  | 0.453991  |
| H  | 0.434197  | 0.648554  | -1.156451 |
| C  | 1.765499  | -1.830231 | -1.058182 |
| H  | 2.307851  | -2.751001 | -1.292939 |
| H  | 1.253449  | -1.529031 | -1.978315 |
| C  | 2.113762  | 0.354122  | 0.145498  |
| H  | 2.315604  | 0.150261  | 1.192052  |
| C  | 2.795235  | -0.722512 | -0.737004 |
| Cl | 4.156126  | -1.479697 | 0.284216  |
| C  | 3.437562  | -0.221929 | -2.028798 |
| H  | 2.694310  | 0.322433  | -2.623434 |
| H  | 3.796551  | -1.073356 | -2.614760 |
| H  | 4.271770  | 0.450614  | -1.828474 |
| Br | 2.915058  | 2.170149  | -0.067255 |

SCF Energy (PCM/mPW1PW91/6-31+G\*\*) =  
-6264.56281532

Number of imaginary frequencies = 0

## 1f\_C008

## B3LYP/6-31G\* Geometry

|    |           |           |           |
|----|-----------|-----------|-----------|
| C  | -1.590967 | -0.984200 | -0.344556 |
| C  | -2.661533 | 0.536655  | 1.451292  |
| C  | -0.173569 | -0.832969 | 0.400525  |
| C  | -2.369969 | 0.320095  | -0.038422 |
| H  | -3.557944 | -0.035797 | 1.717014  |
| H  | -1.835965 | 1.183267  | -0.436736 |
| C  | -1.523964 | 0.066033  | 2.317524  |
| H  | -1.671455 | 0.263559  | 3.378623  |
| C  | -0.435565 | -0.603623 | 1.909624  |
| O  | -3.021689 | 1.885646  | 1.741285  |
| H  | -2.214284 | 2.422169  | 1.681286  |
| Br | -4.115160 | 0.444898  | -1.016658 |
| C  | -2.375246 | -2.208042 | 0.187584  |
| H  | -3.405998 | -2.159293 | -0.176612 |
| H  | -2.399705 | -2.250505 | 1.279122  |
| H  | -1.945447 | -3.145758 | -0.177188 |
| C  | -1.442300 | -1.172444 | -1.868283 |
| H  | -2.430880 | -1.285889 | -2.319393 |
| H  | -0.870940 | -2.076433 | -2.097305 |
| H  | -0.964290 | -0.322682 | -2.365952 |
| C  | 0.531217  | -1.112879 | 2.958152  |
| H  | 0.278762  | -0.696701 | 3.937753  |
| H  | 1.577672  | -0.864140 | 2.750527  |
| H  | 0.484408  | -2.206191 | 3.046996  |
| C  | 0.733018  | -2.083861 | 0.137369  |
| H  | 1.291285  | -2.345479 | 1.039375  |
| H  | 0.121060  | -2.960509 | -0.089888 |
| C  | 0.597965  | 0.437844  | -0.132434 |
| H  | 0.227718  | 1.334133  | 0.366751  |
| H  | 0.428915  | 0.580828  | -1.204034 |
| C  | 1.753463  | -1.881073 | -0.988535 |
| H  | 2.292945  | -2.812949 | -1.182498 |
| H  | 1.244077  | -1.618304 | -1.921887 |
| C  | 2.105028  | 0.351501  | 0.118720  |
| H  | 2.300324  | 0.192557  | 1.174316  |
| C  | 2.786888  | -0.764595 | -0.712293 |
| Cl | 4.139851  | -1.479441 | 0.348221  |
| C  | 3.436487  | -0.322612 | -2.021662 |
| H  | 2.697666  | 0.196529  | -2.643748 |
| H  | 3.796242  | -1.199747 | -2.567707 |
| H  | 4.271605  | 0.355947  | -1.846775 |
| Br | 2.911005  | 2.156295  | -0.167333 |

SCF Energy (PCM/mPW1PW91/6-31+G\*\*) =  
-6264.56100406

Number of imaginary frequencies = 0

## 1f\_C009

## B3LYP/6-31G\* Geometry

|    |           |           |           |
|----|-----------|-----------|-----------|
| C  | -1.603656 | -1.006041 | -0.301920 |
| C  | -2.583485 | 0.675745  | 1.405907  |
| C  | -0.176658 | -0.832936 | 0.417695  |
| C  | -2.356868 | 0.323569  | -0.062871 |
| H  | -3.525746 | 0.213345  | 1.737304  |
| H  | -1.836555 | 1.152509  | -0.539433 |
| C  | -1.479252 | 0.173476  | 2.299817  |
| H  | -1.616150 | 0.403060  | 3.357482  |
| C  | -0.422337 | -0.556938 | 1.920372  |
| O  | -2.706558 | 2.101956  | 1.458185  |
| H  | -3.014410 | 2.343804  | 2.345321  |
| Br | -4.139819 | 0.393203  | -0.982710 |
| C  | -2.395142 | -2.192187 | 0.298355  |
| H  | -3.418423 | -2.173805 | -0.088441 |
| H  | -2.442193 | -2.156573 | 1.389337  |
| H  | -1.954063 | -3.151412 | 0.010664  |
| C  | -1.471751 | -1.268617 | -1.816346 |
| H  | -2.465734 | -1.386699 | -2.254799 |
| H  | -0.916001 | -2.190908 | -2.007598 |
| H  | -0.983203 | -0.449936 | -2.354288 |
| C  | 0.520572  | -1.080975 | 2.982073  |
| H  | 0.273754  | -0.645502 | 3.954943  |
| H  | 1.574506  | -0.861102 | 2.778020  |
| H  | 0.445022  | -2.171618 | 3.083599  |
| C  | 0.726221  | -2.090920 | 0.179290  |
| H  | 1.286566  | -2.335342 | 1.084779  |
| H  | 0.113032  | -2.971664 | -0.029084 |
| C  | 0.583150  | 0.425718  | -0.158883 |
| H  | 0.201012  | 1.334242  | 0.308310  |
| H  | 0.417521  | 0.527933  | -1.235977 |
| C  | 1.743495  | -1.911432 | -0.952857 |
| H  | 2.285309  | -2.845792 | -1.127696 |
| H  | 1.230406  | -1.670896 | -1.890330 |
| C  | 2.088743  | 0.348865  | 0.100727  |
| H  | 2.278247  | 0.212825  | 1.160916  |
| C  | 2.773587  | -0.785921 | -0.702556 |
| Cl | 4.127930  | -1.473729 | 0.375607  |
| C  | 3.423248  | -0.374812 | -2.021861 |
| H  | 2.683936  | 0.129010  | -2.655860 |
| H  | 3.783645  | -1.264396 | -2.547075 |
| H  | 4.257473  | 0.308673  | -1.862991 |
| Br | 2.899834  | 2.144181  | -0.222705 |

SCF Energy (PCM/mPW1PW91/6-31+G\*\*) =  
-6264.56026742

Number of imaginary frequencies = 0

## 1g\_C001

## B3LYP/6-31G\* Geometry

|    |           |           |           |
|----|-----------|-----------|-----------|
| C  | -1.392465 | 0.155414  | 0.770462  |
| C  | -2.919447 | 0.825284  | -1.244049 |
| C  | -0.155271 | 0.961361  | 0.118078  |
| C  | -2.294753 | -0.292699 | -0.404890 |
| H  | -3.246775 | 0.373614  | -2.195251 |
| H  | -1.742018 | -0.958224 | -1.068306 |
| C  | -1.879043 | 1.864710  | -1.528941 |
| H  | -2.170688 | 2.600982  | -2.275392 |
| C  | -0.685466 | 1.974121  | -0.931654 |
| O  | -4.023397 | 1.485686  | -0.635902 |
| H  | -4.687692 | 0.798123  | -0.449614 |
| Br | -3.809791 | -1.498132 | 0.172586  |
| C  | -2.181535 | 1.051951  | 1.752679  |
| H  | -3.140056 | 0.579259  | 1.984013  |
| H  | -2.394208 | 2.039736  | 1.340081  |
| H  | -1.637436 | 1.167464  | 2.695545  |
| C  | -0.956125 | -1.108437 | 1.544948  |
| H  | -1.823902 | -1.549175 | 2.041231  |
| H  | -0.226140 | -0.875796 | 2.321898  |
| H  | -0.542294 | -1.881393 | 0.889003  |
| C  | 0.211438  | 3.120391  | -1.363177 |
| H  | 0.234494  | 3.922158  | -0.614687 |
| H  | -0.158843 | 3.557722  | -2.294641 |
| H  | 1.249459  | 2.810231  | -1.528412 |
| C  | 0.678968  | 1.745425  | 1.185426  |
| H  | 1.208206  | 2.548739  | 0.672990  |
| H  | 0.015412  | 2.238373  | 1.900069  |
| C  | 0.832786  | 0.031831  | -0.685140 |
| H  | 1.349710  | 0.640015  | -1.431853 |
| H  | 0.277029  | -0.719884 | -1.251637 |
| C  | 1.759572  | 0.970027  | 1.952122  |
| H  | 2.330395  | 1.675186  | 2.566894  |
| H  | 1.328001  | 0.240785  | 2.647066  |
| C  | 1.913517  | -0.688534 | 0.126863  |
| H  | 1.489021  | -1.468533 | 0.756486  |
| C  | 2.747719  | 0.204585  | 1.049790  |
| Cl | 3.692642  | 1.446148  | 0.047386  |
| C  | 3.772127  | -0.570074 | 1.875953  |
| H  | 3.256635  | -1.322738 | 2.485978  |
| H  | 4.310408  | 0.106820  | 2.545220  |
| H  | 4.490866  | -1.080367 | 1.232139  |
| Br | 3.036378  | -1.741446 | -1.143957 |

SCF Energy (PCM/mPW1PW91/6-31+G\*\*) =  
-6264.56550950

Number of imaginary frequencies = 0

**1g\_C002****B3LYP/6-31G\* Geometry**

|    |           |           |           |
|----|-----------|-----------|-----------|
| C  | -1.438872 | 0.097591  | 0.801610  |
| C  | -2.884989 | 0.975192  | -1.186263 |
| C  | -0.171428 | 0.918662  | 0.243442  |
| C  | -2.319335 | -0.230992 | -0.425000 |
| H  | -3.179006 | 0.618281  | -2.187432 |
| H  | -1.767328 | -0.857443 | -1.126176 |
| C  | -1.819945 | 2.019982  | -1.334333 |
| H  | -2.084299 | 2.836855  | -2.002909 |
| C  | -0.639446 | 2.043714  | -0.702112 |
| O  | -4.001988 | 1.604040  | -0.568237 |
| H  | -4.680001 | 0.914181  | -0.452896 |
| Br | -3.881102 | -1.430251 | 0.016400  |
| C  | -2.228170 | 0.936089  | 1.833068  |
| H  | -3.165291 | 0.424710  | 2.071917  |
| H  | -2.482760 | 1.927152  | 1.454859  |
| H  | -1.664055 | 1.042433  | 2.764442  |
| C  | -1.016289 | -1.222793 | 1.483558  |
| H  | -1.899814 | -1.728109 | 1.880571  |
| H  | -0.345206 | -1.045067 | 2.329813  |
| H  | -0.528576 | -1.920960 | 0.795051  |
| C  | 0.294529  | 3.200718  | -0.988592 |
| H  | -0.148927 | 3.870955  | -1.730373 |
| H  | 1.263397  | 2.868919  | -1.381064 |
| H  | 0.496972  | 3.796250  | -0.090269 |
| C  | 0.627187  | 1.492270  | 1.464170  |
| H  | 0.167031  | 2.426401  | 1.801536  |
| H  | 0.528180  | 0.800848  | 2.306148  |
| C  | 0.799861  | -0.000392 | -0.591100 |
| H  | 1.229842  | 0.564029  | -1.423998 |
| H  | 0.254561  | -0.830208 | -1.043292 |
| C  | 2.131148  | 1.751904  | 1.239998  |
| H  | 2.270707  | 2.586590  | 0.556072  |
| H  | 2.569148  | 2.066065  | 2.194565  |
| C  | 1.950605  | -0.551208 | 0.246777  |
| H  | 1.575327  | -1.039330 | 1.145574  |
| C  | 2.943855  | 0.526538  | 0.708845  |
| Cl | 3.954775  | 1.107039  | -0.735616 |
| C  | 3.925370  | -0.009612 | 1.749425  |
| H  | 3.369670  | -0.316630 | 2.645347  |
| H  | 4.639883  | 0.765937  | 2.038057  |
| H  | 4.471684  | -0.874510 | 1.366264  |
| Br | 2.823076  | -2.062186 | -0.705583 |

**SCF Energy (PCM/mPW1PW91/6-31+G\*\*) =**  
**-6264.56194954**

**Number of imaginary frequencies = 0**

**1g\_C003****B3LYP/6-31G\* Geometry**

|    |           |           |           |
|----|-----------|-----------|-----------|
| C  | 1.188390  | -0.469747 | -1.057905 |
| C  | 3.191239  | -1.555040 | 0.147733  |
| C  | 0.361240  | -0.300224 | 0.312379  |
| C  | 2.725408  | -0.488153 | -0.841599 |
| H  | 3.078193  | -2.519789 | -0.367943 |
| H  | 3.225651  | -0.617541 | -1.801929 |
| C  | 2.325201  | -1.548023 | 1.371907  |
| H  | 2.764923  | -2.052120 | 2.231114  |
| C  | 1.084385  | -1.048615 | 1.464742  |
| O  | 4.575864  | -1.503996 | 0.442068  |
| H  | 4.753850  | -0.615586 | 0.798916  |
| Br | 3.507718  | 1.284868  | -0.261804 |
| C  | 0.902325  | 0.593951  | -2.141038 |
| H  | 1.494702  | 0.360621  | -3.034224 |
| H  | 1.183971  | 1.599054  | -1.823288 |
| H  | -0.145238 | 0.600387  | -2.450526 |
| C  | 0.881609  | -1.850886 | -1.711273 |
| H  | 1.598203  | -2.059721 | -2.513876 |
| H  | -0.113294 | -1.854486 | -2.166202 |
| H  | 0.926043  | -2.674969 | -0.993996 |
| C  | 0.351900  | -1.246685 | 2.782158  |
| H  | 1.068231  | -1.461344 | 3.580412  |
| H  | -0.341526 | -2.095965 | 2.734085  |
| H  | -0.238229 | -0.377814 | 3.089393  |
| C  | 0.184551  | 1.190631  | 0.772941  |
| H  | -0.040870 | 1.182546  | 1.842346  |
| H  | 1.130873  | 1.722314  | 0.673950  |
| C  | -1.081425 | -0.915439 | 0.218749  |
| H  | -1.471077 | -1.032472 | 1.230490  |
| H  | -1.055810 | -1.917816 | -0.208936 |
| C  | -0.927681 | 2.007571  | 0.094393  |
| H  | -1.032044 | 2.964419  | 0.618198  |
| H  | -0.666734 | 2.254328  | -0.939500 |
| C  | -2.111959 | -0.074554 | -0.531390 |
| H  | -1.859869 | 0.045588  | -1.585742 |
| C  | -2.311603 | 1.331321  | 0.049539  |
| Cl | -2.946024 | 1.208695  | 1.788445  |
| C  | -3.318419 | 2.173397  | -0.730532 |
| H  | -2.990224 | 2.262594  | -1.773988 |
| H  | -3.385509 | 3.177904  | -0.303501 |
| H  | -4.308718 | 1.714396  | -0.718166 |
| Br | -3.815459 | -1.111080 | -0.631397 |

**SCF Energy (PCM/mPW1PW91/6-31+G\*\*) =**  
**-6264.56527165**

**Number of imaginary frequencies = 0**

**1g\_C004****B3LYP/6-31G\* Geometry**

|    |          |          |          |
|----|----------|----------|----------|
| C  | -1.40030 | 0.15274  | 0.76806  |
| C  | -2.93299 | 0.83199  | -1.22886 |
| C  | -0.16246 | 0.95955  | 0.12145  |
| C  | -2.31948 | -0.29081 | -0.40353 |
| H  | -3.30260 | 0.39162  | -2.16830 |
| H  | -1.75451 | -0.92703 | -1.08501 |
| C  | -1.87631 | 1.85413  | -1.53527 |
| H  | -2.14335 | 2.57597  | -2.30878 |
| C  | -0.68552 | 1.97124  | -0.93199 |
| O  | -4.03606 | 1.41993  | -0.53002 |
| H  | -4.30380 | 2.20730  | -1.02963 |
| Br | -3.79356 | -1.52339 | 0.16309  |
| C  | -2.18006 | 1.03983  | 1.76614  |
| H  | -3.15049 | 0.58210  | 1.97433  |
| H  | -2.37019 | 2.04113  | 1.37504  |
| H  | -1.64006 | 1.12559  | 2.71494  |
| C  | -0.95956 | -1.11797 | 1.52887  |
| H  | -1.82411 | -1.56093 | 2.02757  |
| H  | -0.22190 | -0.89122 | 2.30044  |
| H  | -0.55407 | -1.88703 | 0.86311  |
| C  | 0.21510  | 3.11294  | -1.36677 |
| H  | -0.14644 | 3.54404  | -2.30491 |
| H  | 1.25400  | 2.80074  | -1.52043 |
| H  | 0.23363  | 3.91992  | -0.62357 |
| C  | 0.67002  | 1.74307  | 1.19075  |
| H  | 1.19818  | 2.55013  | 0.68284  |
| H  | 0.00423  | 2.23008  | 1.90737  |
| C  | 0.82593  | 0.03097  | -0.68365 |
| H  | 1.34148  | 0.63712  | -1.43294 |
| H  | 0.26810  | -0.72186 | -1.24651 |
| C  | 1.75147  | 0.96722  | 1.95573  |
| H  | 2.32113  | 1.67132  | 2.57283  |
| H  | 1.31978  | 0.23565  | 2.64801  |
| C  | 1.90871  | -0.68766 | 0.12700  |
| H  | 1.48581  | -1.47017 | 0.75443  |
| C  | 2.74075  | 0.20533  | 1.05190  |
| Cl | 3.68352  | 1.45175  | 0.05160  |
| C  | 3.76724  | -0.56851 | 1.87614  |
| H  | 3.25346  | -1.32367 | 2.48446  |
| H  | 4.30392  | 0.10818  | 2.54690  |
| H  | 4.48702  | -1.07575 | 1.23110  |
| Br | 3.03454  | -1.73452 | -1.14641 |

**SCF Energy (PCM/mPW1PW91/6-31+G\*\*) =**  
**-6264.56139312**

**Number of imaginary frequencies = 0**

**1g\_C005****B3LYP/6-31G\* Geometry**

|    |           |           |           |
|----|-----------|-----------|-----------|
| C  | -1.398204 | 0.161161  | 0.771992  |
| C  | -2.912311 | 0.798970  | -1.267122 |
| C  | -0.159521 | 0.963471  | 0.127382  |
| C  | -2.304045 | -0.309990 | -0.399270 |
| H  | -3.236826 | 0.338237  | -2.206839 |
| H  | -1.729965 | -0.968231 | -1.052246 |
| C  | -1.870097 | 1.842631  | -1.544827 |
| H  | -2.155920 | 2.571698  | -2.301666 |
| C  | -0.688996 | 1.976337  | -0.923134 |
| O  | -4.104665 | 1.396124  | -0.761138 |
| H  | -3.855138 | 1.982275  | -0.030712 |
| Br | -3.788021 | -1.515355 | 0.188849  |
| C  | -2.193467 | 1.070526  | 1.741554  |
| H  | -3.188076 | 0.646785  | 1.909537  |
| H  | -2.302971 | 2.093503  | 1.365103  |
| H  | -1.698721 | 1.137052  | 2.715524  |
| C  | -0.965069 | -1.087477 | 1.571976  |
| H  | -1.834439 | -1.521436 | 2.070332  |
| H  | -0.235622 | -0.840927 | 2.345213  |
| H  | -0.551153 | -1.870511 | 0.928718  |
| C  | 0.196454  | 3.137768  | -1.335880 |
| H  | 0.209929  | 3.931301  | -0.578107 |
| H  | -0.172951 | 3.581758  | -2.264548 |
| H  | 1.238120  | 2.838670  | -1.498992 |
| C  | 0.675845  | 1.740395  | 1.200219  |
| H  | 1.198137  | 2.553340  | 0.695920  |
| H  | 0.014106  | 2.220634  | 1.926004  |
| C  | 0.826525  | 0.036634  | -0.681238 |
| H  | 1.343063  | 0.648008  | -1.425668 |
| H  | 0.268168  | -0.711019 | -1.249942 |
| C  | 1.764573  | 0.964460  | 1.956171  |
| H  | 2.337987  | 1.669614  | 2.568489  |
| H  | 1.340052  | 0.232524  | 2.652377  |
| C  | 1.907616  | -0.688404 | 0.125703  |
| H  | 1.482557  | -1.467659 | 0.756216  |
| C  | 2.747322  | 0.202402  | 1.045957  |
| Cl | 3.684597  | 1.448340  | 0.041047  |
| C  | 3.777444  | -0.573575 | 1.863593  |
| H  | 3.266479  | -1.329585 | 2.473255  |
| H  | 4.318457  | 0.101458  | 2.532514  |
| H  | 4.493151  | -1.080248 | 1.213659  |
| Br | 3.023059  | -1.740642 | -1.150886 |

**SCF Energy (PCM/mPW1PW91/6-31+G\*\*) =**  
**-6264.56308421**

**Number of imaginary frequencies = 0**

## 1g\_C006

## B3LYP/6-31G\* Geometry

|    |           |           |           |
|----|-----------|-----------|-----------|
| C  | -1.449300 | 0.098687  | 0.801649  |
| C  | -2.893903 | 0.978397  | -1.175750 |
| C  | -0.177905 | 0.914423  | 0.249329  |
| C  | -2.343048 | -0.228839 | -0.422794 |
| H  | -3.226568 | 0.628769  | -2.165846 |
| H  | -1.775426 | -0.827844 | -1.135202 |
| C  | -1.810715 | 2.006734  | -1.344804 |
| H  | -2.046640 | 2.811246  | -2.043163 |
| C  | -0.634557 | 2.037359  | -0.703192 |
| O  | -4.018039 | 1.529580  | -0.480150 |
| H  | -4.279039 | 2.335708  | -0.952696 |
| Br | -3.866282 | -1.452831 | 0.006686  |
| C  | -2.231430 | 0.934213  | 1.840987  |
| H  | -3.188855 | 0.447858  | 2.046518  |
| H  | -2.449488 | 1.941601  | 1.483037  |
| H  | -1.680037 | 1.003280  | 2.783804  |
| C  | -1.028275 | -1.225040 | 1.478444  |
| H  | -1.911241 | -1.725369 | 1.881461  |
| H  | -0.347561 | -1.051336 | 2.317994  |
| H  | -0.552240 | -1.925834 | 0.784443  |
| C  | 0.306319  | 3.187411  | -0.992762 |
| H  | -0.124190 | 3.851925  | -1.747683 |
| H  | 1.278556  | 2.847147  | -1.368617 |
| H  | 0.500382  | 3.791269  | -0.098020 |
| C  | 0.618501  | 1.486758  | 1.471662  |
| H  | 0.157075  | 2.419848  | 1.810620  |
| H  | 0.515971  | 0.793350  | 2.311296  |
| C  | 0.792078  | -0.008247 | -0.583796 |
| H  | 1.218661  | 0.549694  | -1.422725 |
| H  | 0.244499  | -0.841354 | -1.026852 |
| C  | 2.123737  | 1.746798  | 1.256226  |
| H  | 2.269035  | 2.591967  | 0.586353  |
| H  | 2.558015  | 2.045208  | 2.217553  |
| C  | 1.946848  | -0.553142 | 0.251978  |
| H  | 1.575540  | -1.043161 | 1.151544  |
| C  | 2.937586  | 0.528279  | 0.710450  |
| Cl | 3.931567  | 1.121220  | -0.741893 |
| C  | 3.933275  | -0.006002 | 1.738467  |
| H  | 3.388229  | -0.324273 | 2.636967  |
| H  | 4.643075  | 0.774256  | 2.026199  |
| H  | 4.484107  | -0.863131 | 1.344671  |
| Br | 2.824012  | -2.059025 | -0.704538 |

SCF Energy (PCM/mPW1PW91/6-31+G\*\*) =  
-6264.55773159

Number of imaginary frequencies = 0

## 1g\_C007

## B3LYP/6-31G\* Geometry

|    |          |          |          |
|----|----------|----------|----------|
| C  | -1.57720 | -0.75167 | 0.53400  |
| C  | -2.51465 | 1.60701  | -0.07467 |
| C  | -0.08139 | -0.12325 | 0.59018  |
| C  | -2.35760 | 0.12934  | -0.46515 |
| H  | -2.69808 | 2.17655  | -1.00134 |
| H  | -1.89322 | 0.06971  | -1.44879 |
| C  | -1.26797 | 2.10322  | 0.59934  |
| H  | -1.32566 | 3.14989  | 0.89060  |
| C  | -0.20628 | 1.37539  | 0.97264  |
| O  | -3.56760 | 1.86343  | 0.84991  |
| H  | -4.38267 | 1.50963  | 0.45131  |
| Br | -4.20017 | -0.58368 | -0.88231 |
| C  | -2.22705 | -0.73701 | 1.93555  |
| H  | -3.28730 | -0.99109 | 1.84495  |
| H  | -2.16449 | 0.23957  | 2.41665  |
| H  | -1.75983 | -1.48527 | 2.58403  |
| C  | -1.60637 | -2.21607 | 0.03192  |
| H  | -2.60677 | -2.62735 | 0.18489  |
| H  | -0.91066 | -2.85544 | 0.58235  |
| H  | -1.39173 | -2.31472 | -1.03712 |
| C  | 0.83253  | 2.05986  | 1.83857  |
| H  | 0.95298  | 1.55259  | 2.80325  |
| H  | 0.51852  | 3.08581  | 2.05106  |
| H  | 1.81266  | 2.10590  | 1.36010  |
| C  | 0.75055  | -0.91081 | 1.65030  |
| H  | 0.48531  | -0.56704 | 2.65428  |
| H  | 0.46238  | -1.96427 | 1.62249  |
| C  | 0.58046  | -0.28314 | -0.83202 |
| H  | 0.22839  | 0.50786  | -1.49796 |
| H  | 0.23649  | -1.22647 | -1.26609 |
| C  | 2.28549  | -0.84397 | 1.50424  |
| H  | 2.66153  | 0.15841  | 1.71648  |
| H  | 2.74109  | -1.51586 | 2.23999  |
| C  | 2.11433  | -0.33489 | -0.95583 |
| H  | 2.37699  | -0.68764 | -1.95377 |
| C  | 2.75273  | -1.24988 | 0.10379  |
| Cl | 4.59178  | -1.11770 | 0.04978  |
| C  | 2.44676  | -2.71904 | -0.23196 |
| H  | 1.37102  | -2.91416 | -0.24518 |
| H  | 2.90271  | -3.37268 | 0.51697  |
| H  | 2.85626  | -2.98392 | -1.21097 |
| Br | 2.87870  | 1.50976  | -0.97796 |

SCF Energy (PCM/mPW1PW91/6-31+G\*\*) =  
-6264.55893989

Number of imaginary frequencies = 0

## 1g\_C008

## B3LYP/6-31G\* Geometry

|    |           |           |           |
|----|-----------|-----------|-----------|
| C  | -1.441661 | 0.096638  | 0.797306  |
| C  | -2.885762 | 0.957628  | -1.206098 |
| C  | -0.175408 | 0.917693  | 0.246329  |
| C  | -2.334056 | -0.245737 | -0.424609 |
| H  | -3.180080 | 0.595478  | -2.197557 |
| H  | -1.765461 | -0.864378 | -1.119945 |
| C  | -1.818417 | 2.005306  | -1.346012 |
| H  | -2.078605 | 2.818929  | -2.021444 |
| C  | -0.644770 | 2.043863  | -0.697446 |
| O  | -4.087968 | 1.528991  | -0.695196 |
| H  | -3.869633 | 2.001953  | 0.122176  |
| Br | -3.865100 | -1.445811 | 0.032383  |
| C  | -2.227654 | 0.942017  | 1.828988  |
| H  | -3.214818 | 0.498875  | 1.991662  |
| H  | -2.353866 | 1.980841  | 1.505910  |
| H  | -1.714712 | 0.966892  | 2.794919  |
| C  | -1.021802 | -1.218646 | 1.490757  |
| H  | -1.904781 | -1.717918 | 1.895304  |
| H  | -0.341820 | -1.038055 | 2.329312  |
| H  | -0.544472 | -1.923077 | 0.801709  |
| C  | 0.280420  | 3.211412  | -0.968774 |
| H  | -0.164463 | 3.885022  | -1.706732 |
| H  | 1.252328  | 2.888684  | -1.361327 |
| H  | 0.478279  | 3.800101  | -0.064773 |
| C  | 0.622585  | 1.487695  | 1.469841  |
| H  | 0.164442  | 2.421847  | 1.810948  |
| H  | 0.522554  | 0.793931  | 2.309730  |
| C  | 0.795835  | 0.002087  | -0.591413 |
| H  | 1.225602  | 0.569639  | -1.422316 |
| H  | 0.249031  | -0.825195 | -1.046080 |
| C  | 2.126770  | 1.747610  | 1.248315  |
| H  | 2.266981  | 2.585735  | 0.568594  |
| H  | 2.564358  | 2.056800  | 2.204670  |
| C  | 1.946631  | -0.551940 | 0.244259  |
| H  | 1.571252  | -1.044818 | 1.140447  |
| C  | 2.939274  | 0.524454  | 0.711276  |
| Cl | 3.949314  | 1.112781  | -0.729951 |
| C  | 3.920914  | -0.016376 | 1.749409  |
| H  | 3.365378  | -0.328636 | 2.643620  |
| H  | 4.635146  | 0.757879  | 2.042199  |
| H  | 4.467627  | -0.878989 | 1.361735  |
| Br | 2.820464  | -2.056273 | -0.715948 |

SCF Energy (PCM/mPW1PW91/6-31+G\*\*) =  
-6264.55924364

Number of imaginary frequencies = 0

## 1g\_C009

## B3LYP/6-31G\* Geometry

|    |           |           |           |
|----|-----------|-----------|-----------|
| C  | 1.194092  | -0.454094 | -1.058503 |
| C  | 3.181700  | -1.547197 | 0.128264  |
| C  | 0.363505  | -0.296467 | 0.311691  |
| C  | 2.735253  | -0.460478 | -0.835896 |
| H  | 3.026899  | -2.502749 | -0.405333 |
| H  | 3.230285  | -0.593540 | -1.798707 |
| C  | 2.330846  | -1.540009 | 1.362576  |
| H  | 2.765142  | -2.040580 | 2.229001  |
| C  | 1.088065  | -1.048659 | 1.460228  |
| O  | 4.572593  | -1.409391 | 0.393348  |
| H  | 4.826829  | -2.134401 | 0.985572  |
| Br | 3.499048  | 1.298421  | -0.251395 |
| C  | 0.907826  | 0.620659  | -2.130707 |
| H  | 1.500564  | 0.395288  | -3.025765 |
| H  | 1.192336  | 1.621240  | -1.802825 |
| H  | -0.139770 | 0.629070  | -2.440370 |
| C  | 0.881904  | -1.825264 | -1.728021 |
| H  | 1.601642  | -2.027706 | -2.529510 |
| H  | -0.110991 | -1.819268 | -2.187885 |
| H  | 0.917762  | -2.659723 | -1.022051 |
| C  | 0.358601  | -1.253863 | 2.777974  |
| H  | 1.075929  | -1.467405 | 3.575898  |
| H  | -0.332264 | -2.105176 | 2.727748  |
| H  | -0.234107 | -0.387985 | 3.087816  |
| C  | 0.182795  | 1.190772  | 0.782613  |
| H  | -0.040993 | 1.176619  | 1.852292  |
| H  | 1.128065  | 1.724057  | 0.682847  |
| C  | -1.076785 | -0.916610 | 0.213844  |
| H  | -1.467288 | -1.041936 | 1.224390  |
| H  | -1.047933 | -1.915686 | -0.221467 |
| C  | -0.932731 | 2.007469  | 0.109637  |
| H  | -1.040681 | 2.960440  | 0.639755  |
| H  | -0.671975 | 2.261939  | -0.922369 |
| C  | -2.109123 | -0.073785 | -0.531379 |
| H  | -1.855589 | 0.054815  | -1.584345 |
| C  | -2.314363 | 1.326938  | 0.059355  |
| Cl | -2.949852 | 1.189046  | 1.797405  |
| C  | -3.324145 | 2.170896  | -0.714756 |
| H  | -2.995584 | 2.269282  | -1.757259 |
| H  | -3.395053 | 3.171891  | -0.280189 |
| H  | -4.312772 | 1.708143  | -0.706435 |
| Br | -3.809287 | -1.116054 | -0.641891 |

SCF Energy (PCM/mPW1PW91/6-31+G\*\*) =  
-6264.56014069

Number of imaginary frequencies = 0



**1g\_C010****B3LYP/6-31G\* Geometry**

|    |           |           |           |
|----|-----------|-----------|-----------|
| C  | -1.583752 | -0.737225 | 0.539160  |
| C  | -2.529459 | 1.606414  | -0.079716 |
| C  | -0.088239 | -0.114635 | 0.590980  |
| C  | -2.380808 | 0.135696  | -0.463367 |
| H  | -2.754842 | 2.175565  | -0.995615 |
| H  | -1.895857 | 0.090562  | -1.437712 |
| C  | -1.265753 | 2.112892  | 0.560840  |
| H  | -1.290508 | 3.174783  | 0.812033  |
| C  | -0.206660 | 1.389271  | 0.952309  |
| O  | -3.618743 | 1.759706  | 0.839251  |
| H  | -3.592395 | 2.673207  | 1.165376  |
| Br | -4.190899 | -0.602047 | -0.894532 |
| C  | -2.226368 | -0.723505 | 1.944228  |
| H  | -3.293382 | -0.945195 | 1.854825  |
| H  | -2.135499 | 0.245053  | 2.437752  |
| H  | -1.774034 | -1.490049 | 2.582206  |
| C  | -1.612084 | -2.203715 | 0.042179  |
| H  | -2.607044 | -2.619878 | 0.212983  |
| H  | -0.901262 | -2.835886 | 0.581896  |
| H  | -1.417780 | -2.303622 | -1.030569 |
| C  | 0.835550  | 2.083938  | 1.805103  |
| H  | 0.532088  | 3.117637  | 1.996169  |
| H  | 1.816856  | 2.110679  | 1.328099  |
| H  | 0.949127  | 1.594483  | 2.779833  |
| C  | 0.742225  | -0.890199 | 1.661171  |
| H  | 0.476609  | -0.534574 | 2.661086  |
| H  | 0.451122  | -1.943021 | 1.645579  |
| C  | 0.576065  | -0.290712 | -0.828184 |
| H  | 0.225531  | 0.492031  | -1.504494 |
| H  | 0.229991  | -1.238275 | -1.250702 |
| C  | 2.277637  | -0.829157 | 1.516464  |
| H  | 2.657227  | 0.173956  | 1.719131  |
| H  | 2.730304  | -1.494883 | 2.259585  |
| C  | 2.109783  | -0.347864 | -0.950178 |
| H  | 2.372360  | -0.713434 | -1.943490 |
| C  | 2.745890  | -1.251003 | 0.121056  |
| Cl | 4.585539  | -1.122244 | 0.068016  |
| C  | 2.437903  | -2.723383 | -0.198457 |
| H  | 1.361886  | -2.916811 | -0.210296 |
| H  | 2.892294  | -3.369265 | 0.558139  |
| H  | 2.847719  | -2.999819 | -1.174111 |
| Br | 2.880147  | 1.495086  | -0.996882 |

**SCF Energy (PCM/mPW1PW91/6-31+G\*\*) =**  
**-6264.55461365**

**Number of imaginary frequencies = 0**

**1g\_C011****B3LYP/6-31G\* Geometry**

|    |           |           |           |
|----|-----------|-----------|-----------|
| C  | -1.304983 | -1.149300 | -0.488845 |
| C  | -3.354842 | 0.133857  | -1.360713 |
| C  | -0.400629 | 0.175670  | -0.486373 |
| C  | -2.812084 | -0.840975 | -0.306243 |
| H  | -3.500257 | -0.470467 | -2.268870 |
| H  | -3.379293 | -1.771730 | -0.333158 |
| C  | -2.367459 | 1.217163  | -1.694973 |
| H  | -2.786680 | 2.009549  | -2.313368 |
| C  | -1.054506 | 1.227354  | -1.416229 |
| O  | -4.655223 | 0.624528  | -1.088450 |
| H  | -4.620244 | 1.042908  | -0.209954 |
| Br | -3.320449 | -0.183043 | 1.534360  |
| C  | -0.880692 | -2.214438 | 0.544130  |
| H  | -1.518030 | -3.099630 | 0.430321  |
| H  | -0.986556 | -1.878650 | 1.577804  |
| H  | 0.149367  | -2.544795 | 0.378519  |
| C  | -1.231398 | -1.850572 | -1.883869 |
| H  | -2.057414 | -2.561983 | -1.996301 |
| H  | -0.310085 | -2.429948 | -1.984796 |
| H  | -1.278246 | -1.138630 | -2.711738 |
| C  | -0.214500 | 2.330863  | -2.030921 |
| H  | -0.861467 | 3.114006  | -2.437005 |
| H  | 0.393385  | 1.952402  | -2.863254 |
| H  | 0.481121  | 2.801839  | -1.331409 |
| C  | -0.276284 | 0.816488  | 0.950830  |
| H  | -1.145505 | 1.445086  | 1.145955  |
| H  | -0.311704 | 0.027975  | 1.706997  |
| C  | 1.060035  | -0.171633 | -0.960180 |
| H  | 1.475944  | 0.640033  | -1.560013 |
| H  | 1.069761  | -1.050527 | -1.602132 |
| C  | 0.989047  | 1.659773  | 1.195360  |
| H  | 0.984753  | 2.540504  | 0.553663  |
| H  | 0.957407  | 2.038944  | 2.223430  |
| C  | 2.013624  | -0.398718 | 0.211992  |
| H  | 1.592525  | -1.104614 | 0.927224  |
| C  | 2.328187  | 0.884806  | 0.997650  |
| Cl | 3.468735  | 1.967584  | 0.016262  |
| C  | 3.027246  | 0.584014  | 2.321955  |
| H  | 2.353050  | 0.000504  | 2.962761  |
| H  | 3.277953  | 1.511512  | 2.843534  |
| H  | 3.940521  | 0.006179  | 2.161419  |
| Br | 3.641261  | -1.358435 | -0.403786 |

**SCF Energy (PCM/mPW1PW91/6-31+G\*\*) =**  
**-6264.55546329**

**Number of imaginary frequencies = 0**

## 1h\_C001

## B3LYP/6-31G\* Geometry

|    |           |           |           |
|----|-----------|-----------|-----------|
| C  | -1.505557 | 0.220468  | 0.825132  |
| C  | -2.737068 | 0.641317  | -1.437892 |
| C  | -0.153485 | 0.852473  | 0.201739  |
| C  | -2.294550 | -0.363452 | -0.365934 |
| H  | -2.929985 | 0.071540  | -2.362546 |
| H  | -1.713159 | -1.153349 | -0.841530 |
| C  | -1.643941 | 1.639333  | -1.685176 |
| H  | -1.857679 | 2.328971  | -2.499450 |
| C  | -0.524399 | 1.797478  | -0.965764 |
| O  | -3.894662 | 1.399642  | -1.104643 |
| H  | -4.596579 | 0.756953  | -0.896943 |
| Br | -3.935069 | -1.387197 | 0.207658  |
| C  | -2.320712 | 1.306991  | 1.562131  |
| H  | -3.307266 | 0.908977  | 1.816358  |
| H  | -2.473726 | 2.199873  | 0.953888  |
| H  | -1.828042 | 1.591012  | 2.497050  |
| C  | -1.214783 | -0.920984 | 1.830443  |
| H  | -2.121415 | -1.142788 | 2.398527  |
| H  | -0.434501 | -0.653269 | 2.547019  |
| H  | -0.913510 | -1.851796 | 1.339972  |
| C  | 0.378792  | 2.954643  | -1.347537 |
| H  | -0.059890 | 3.513651  | -2.178817 |
| H  | 1.379434  | 2.637657  | -1.664043 |
| H  | 0.513385  | 3.656992  | -0.516449 |
| C  | 0.608837  | 1.601868  | 1.340131  |
| H  | 0.123578  | 2.563043  | 1.538531  |
| H  | 0.513757  | 1.021332  | 2.260003  |
| C  | 0.755928  | -0.308124 | -0.342919 |
| H  | 0.358324  | -0.681951 | -1.289586 |
| H  | 0.748804  | -1.140379 | 0.362061  |
| C  | 2.112142  | 1.853820  | 1.130220  |
| H  | 2.281225  | 2.639547  | 0.386952  |
| H  | 2.543037  | 2.222139  | 2.067932  |
| C  | 2.220027  | 0.063323  | -0.567349 |
| H  | 2.332866  | 0.796149  | -1.368090 |
| C  | 2.927933  | 0.632387  | 0.667368  |
| Cl | 2.919464  | -0.619541 | 2.033352  |
| C  | 4.387225  | 1.005394  | 0.414754  |
| H  | 4.972089  | 0.129805  | 0.127494  |
| H  | 4.826448  | 1.449142  | 1.312562  |
| H  | 4.442802  | 1.740990  | -0.397807 |
| Br | 3.156442  | -1.530825 | -1.318487 |

SCF Energy (PCM/mPW1PW91/6-31+G\*\*) =  
-6264.56856666

Number of imaginary frequencies = 0

## 1h\_C002

## B3LYP/6-31G\* Geometry

|    |           |           |           |
|----|-----------|-----------|-----------|
| C  | -1.512539 | 0.208298  | 0.821895  |
| C  | -2.757457 | 0.672263  | -1.414829 |
| C  | -0.160497 | 0.849069  | 0.211937  |
| C  | -2.320384 | -0.354363 | -0.374440 |
| H  | -3.000700 | 0.129967  | -2.342228 |
| H  | -1.722557 | -1.110120 | -0.883744 |
| C  | -1.644510 | 1.651759  | -1.669578 |
| H  | -1.829689 | 2.338045  | -2.497674 |
| C  | -0.526265 | 1.807155  | -0.946080 |
| O  | -3.925718 | 1.367783  | -0.963898 |
| H  | -4.144571 | 2.029448  | -1.638823 |
| Br | -3.917889 | -1.418100 | 0.186232  |
| C  | -2.320031 | 1.279339  | 1.589512  |
| H  | -3.319166 | 0.891245  | 1.804987  |
| H  | -2.444963 | 2.199594  | 1.016081  |
| H  | -1.837797 | 1.517099  | 2.542916  |
| C  | -1.218488 | -0.953637 | 1.802534  |
| H  | -2.120593 | -1.180601 | 2.374856  |
| H  | -0.428078 | -0.703094 | 2.514498  |
| H  | -0.930488 | -1.877478 | 1.291552  |
| C  | 0.380099  | 2.964845  | -1.317747 |
| H  | 0.509304  | 3.662637  | -0.481848 |
| H  | -0.050834 | 3.528989  | -2.150060 |
| H  | 1.382768  | 2.648878  | -1.627601 |
| C  | 0.601163  | 1.584327  | 1.359896  |
| H  | 0.114333  | 2.541814  | 1.572417  |
| H  | 0.506023  | 0.990803  | 2.271396  |
| C  | 0.751669  | -0.302628 | -0.347983 |
| H  | 0.354421  | -0.665979 | -1.298824 |
| H  | 0.743908  | -1.143174 | 0.346897  |
| C  | 2.104327  | 1.841389  | 1.154613  |
| H  | 2.273718  | 2.638041  | 0.422973  |
| H  | 2.534144  | 2.196918  | 2.097755  |
| C  | 2.215804  | 0.072332  | -0.566361 |
| H  | 2.330246  | 0.814078  | -1.358589 |
| C  | 2.922442  | 0.627566  | 0.675627  |
| Cl | 2.917479  | -0.640918 | 2.025571  |
| C  | 4.380824  | 1.007230  | 0.427064  |
| H  | 4.967366  | 0.136803  | 0.127782  |
| H  | 4.819720  | 1.439960  | 1.330394  |
| H  | 4.434285  | 1.753749  | -0.375683 |
| Br | 3.154771  | -1.512013 | -1.335355 |

SCF Energy (PCM/mPW1PW91/6-31+G\*\*) =  
-6264.56406678

Number of imaginary frequencies = 0

## 1h\_C003

## B3LYP/6-31G\* Geometry

|    |            |            |            |
|----|------------|------------|------------|
| C  | 1.3322660  | -0.3326400 | -1.2141210 |
| C  | 3.1942760  | -1.5776420 | 0.0383060  |
| C  | 0.3543030  | -0.3480510 | 0.0635180  |
| C  | 2.8318740  | -0.3713590 | -0.8314380 |
| H  | 3.2115640  | -2.4427350 | -0.6407440 |
| H  | 3.4416270  | -0.3582390 | -1.7356770 |
| C  | 2.1480770  | -1.8284040 | 1.0870130  |
| H  | 2.4661150  | -2.5269470 | 1.8594790  |
| C  | 0.8899390  | -1.3610280 | 1.1030070  |
| O  | 4.5099880  | -1.5483760 | 0.5614830  |
| H  | 4.5981580  | -0.7107410 | 1.0504650  |
| Br | 3.5055110  | 1.3010700  | 0.0812660  |
| C  | 1.0986010  | 0.8614990  | -2.1663810 |
| H  | 1.6194980  | 0.6739240  | -3.1128850 |
| H  | 1.4908390  | 1.7970320  | -1.7631750 |
| H  | 0.0394680  | 1.0045470  | -2.3978660 |
| C  | 1.1175370  | -1.6255800 | -2.0629120 |
| H  | 1.9270400  | -1.7384300 | -2.7930640 |
| H  | 0.1855440  | -1.5651690 | -2.6303770 |
| H  | 1.0824960  | -2.5306990 | -1.4504170 |
| C  | -0.0186010 | -1.8748140 | 2.2038600  |
| H  | 0.5424420  | -2.5248670 | 2.8814630  |
| H  | -0.8479040 | -2.4709450 | 1.8023160  |
| H  | -0.4575830 | -1.0764540 | 2.8109670  |
| C  | 0.2513630  | 1.0784690  | 0.7140490  |
| H  | 1.1259080  | 1.2518780  | 1.3422370  |
| H  | 0.2916800  | 1.8265300  | -0.0790690 |
| C  | -1.0689330 | -0.7693490 | -0.4574060 |
| H  | -1.1045660 | -1.8496020 | -0.6195360 |
| H  | -1.2411090 | -0.3053700 | -1.4306040 |
| C  | -1.0067670 | 1.3873710  | 1.5382830  |
| H  | -1.0132630 | 0.8320040  | 2.4840890  |
| H  | -0.9951510 | 2.4489110  | 1.8104280  |
| C  | -2.2693060 | -0.3917060 | 0.4137870  |
| H  | -2.3023130 | -0.9752780 | 1.3328580  |
| C  | -2.3380140 | 1.0780450  | 0.8322770  |
| Cl | -2.4697610 | 2.1610800  | -0.6651490 |
| C  | -3.5352100 | 1.4018430  | 1.7225400  |
| H  | -4.4751590 | 1.2015980  | 1.2051910  |
| H  | -3.5106220 | 2.4527210  | 2.0239520  |
| H  | -3.4983680 | 0.7815330  | 2.6271740  |
| Br | -3.9214750 | -1.0012560 | -0.5289180 |

SCF Energy (PCM/mPW1PW91/6-31+G\*\*) =  
-6264.56604176

Number of imaginary frequencies = 0

## 1h\_C004

## B3LYP/6-31G\* Geometry

|    |           |           |           |
|----|-----------|-----------|-----------|
| C  | 1.339358  | -0.314919 | -1.211805 |
| C  | 3.187575  | -1.568367 | 0.019221  |
| C  | 0.356918  | -0.340211 | 0.062830  |
| C  | 2.842002  | -0.345342 | -0.819430 |
| H  | 3.173709  | -2.421373 | -0.683634 |
| H  | 3.447010  | -0.336873 | -1.727137 |
| C  | 2.151069  | -1.823506 | 1.075374  |
| H  | 2.458008  | -2.527405 | 1.850376  |
| C  | 0.893106  | -1.357968 | 1.097007  |
| O  | 4.506730  | -1.444756 | 0.538573  |
| H  | 4.717452  | -2.277127 | 0.990183  |
| Br | 3.500871  | 1.310538  | 0.093053  |
| C  | 1.107406  | 0.888731  | -2.152143 |
| H  | 1.625922  | 0.707584  | -3.101357 |
| H  | 1.506102  | 1.817214  | -1.740028 |
| H  | 0.048148  | 1.036579  | -2.380618 |
| C  | 1.120075  | -1.596390 | -2.075198 |
| H  | 1.933600  | -1.705506 | -2.801480 |
| H  | 0.191993  | -1.524870 | -2.648072 |
| H  | 1.074956  | -2.509482 | -1.474848 |
| C  | -0.012156 | -1.875630 | 2.198430  |
| H  | 0.549490  | -2.527454 | 2.874204  |
| H  | -0.842678 | -2.470174 | 1.797254  |
| H  | -0.448750 | -1.078345 | 2.808210  |
| C  | 0.246536  | 1.082053  | 0.721044  |
| H  | 1.121338  | 1.258715  | 1.347645  |
| H  | 0.283266  | 1.832602  | -0.069603 |
| C  | -1.064223 | -0.763715 | -0.462348 |
| H  | -1.096222 | -1.842790 | -0.633368 |
| H  | -1.236441 | -0.292561 | -1.432053 |
| C  | -1.013774 | 1.381303  | 1.545483  |
| H  | -1.019381 | 0.822553  | 2.489441  |
| H  | -1.006821 | 2.441725  | 1.822147  |
| C  | -2.267107 | -0.397043 | 0.410123  |
| H  | -2.299004 | -0.986222 | 1.325634  |
| C  | -2.343638 | 1.069715  | 0.837471  |
| Cl | -2.481750 | 2.160692  | -0.653311 |
| C  | -3.542631 | 1.381678  | 1.729613  |
| H  | -4.481616 | 1.180036  | 1.210996  |
| H  | -3.523215 | 2.430714  | 2.037712  |
| H  | -3.502647 | 0.755963  | 2.630427  |
| Br | -3.916339 | -1.009954 | -0.537292 |

SCF Energy (PCM/mPW1PW91/6-31+G\*\*) =  
-6264.56067155

Number of imaginary frequencies = 0

## 1i\_C001

## B3LYP/6-31G\* Geometry

|    |           |           |           |
|----|-----------|-----------|-----------|
| C  | -1.330344 | -0.421858 | -0.227753 |
| C  | -3.139822 | 1.459487  | -0.071708 |
| C  | -0.176875 | 0.642359  | 0.148171  |
| C  | -2.633069 | 0.102653  | 0.424356  |
| H  | -3.854456 | 1.834150  | 0.680070  |
| H  | -2.516169 | 0.149934  | 1.507229  |
| C  | -1.985894 | 2.410087  | -0.164485 |
| H  | -2.269454 | 3.449014  | -0.321139 |
| C  | -0.688019 | 2.085017  | -0.109269 |
| O  | -3.772898 | 1.433364  | -1.345650 |
| H  | -4.510562 | 0.801265  | -1.274284 |
| Br | -4.181786 | -1.185873 | 0.261629  |
| C  | -1.055798 | -1.836969 | 0.327509  |
| H  | -1.823534 | -2.525202 | -0.033652 |
| H  | -1.084404 | -1.872467 | 1.421172  |
| H  | -0.093482 | -2.227456 | -0.008949 |
| C  | -1.501284 | -0.548947 | -1.759308 |
| H  | -2.437618 | -1.070852 | -1.974972 |
| H  | -0.689598 | -1.140752 | -2.194452 |
| H  | -1.544116 | 0.420378  | -2.259114 |
| C  | 0.322440  | 3.209885  | -0.244854 |
| H  | -0.170672 | 4.176988  | -0.112543 |
| H  | 0.790434  | 3.217965  | -1.237123 |
| H  | 1.134354  | 3.144598  | 0.487933  |
| C  | 0.235424  | 0.603307  | 1.663861  |
| H  | 0.627506  | 1.589497  | 1.929334  |
| H  | -0.651403 | 0.466150  | 2.291713  |
| C  | 1.117919  | 0.435790  | -0.717726 |
| H  | 1.681941  | 1.367536  | -0.728440 |
| H  | 0.855882  | 0.232973  | -1.756630 |
| C  | 1.294167  | -0.430220 | 2.085957  |
| H  | 1.591183  | -0.230990 | 3.121791  |
| H  | 0.883124  | -1.444727 | 2.072169  |
| C  | 2.105142  | -0.628432 | -0.239333 |
| H  | 1.709687  | -1.639433 | -0.333992 |
| C  | 2.562891  | -0.461050 | 1.214800  |
| Cl | 3.442071  | 1.158494  | 1.422344  |
| C  | 3.527719  | -1.551123 | 1.675484  |
| H  | 3.050051  | -2.533058 | 1.566238  |
| H  | 3.788354  | -1.409089 | 2.727982  |
| H  | 4.440981  | -1.543438 | 1.077858  |
| Br | 3.634139  | -0.665390 | -1.521545 |

SCF Energy (PCM/mPW1PW91/6-31+G\*\*) =  
-6264.56540596

Number of imaginary frequencies = 0

## 1i\_C002

## B3LYP/6-31G\* Geometry

|    |           |           |           |
|----|-----------|-----------|-----------|
| C  | -1.337652 | -0.416631 | -0.237372 |
| C  | -3.144620 | 1.455800  | -0.065520 |
| C  | -0.182305 | 0.636388  | 0.157565  |
| C  | -2.655171 | 0.094351  | 0.409487  |
| H  | -3.891777 | 1.813303  | 0.660704  |
| H  | -2.527863 | 0.151707  | 1.490608  |
| C  | -1.986989 | 2.411092  | -0.105208 |
| H  | -2.260311 | 3.462929  | -0.203446 |
| C  | -0.687746 | 2.085901  | -0.065675 |
| O  | -3.768242 | 1.342305  | -1.349374 |
| H  | -3.922012 | 2.243477  | -1.674102 |
| Br | -4.176450 | -1.200167 | 0.253809  |
| C  | -1.065874 | -1.837193 | 0.305660  |
| H  | -1.827607 | -2.522529 | -0.071680 |
| H  | -1.109308 | -1.885261 | 1.398425  |
| H  | -0.097507 | -2.219687 | -0.022969 |
| C  | -1.494114 | -0.532092 | -1.771447 |
| H  | -2.443879 | -1.022053 | -2.000348 |
| H  | -0.691940 | -1.141517 | -2.200709 |
| H  | -1.503332 | 0.440790  | -2.266767 |
| C  | 0.323735  | 3.212556  | -0.171445 |
| H  | -0.166024 | 4.177455  | -0.011037 |
| H  | 0.789950  | 3.246244  | -1.164173 |
| H  | 1.137654  | 3.124952  | 0.556506  |
| C  | 0.226936  | 0.569203  | 1.673821  |
| H  | 0.615194  | 1.550561  | 1.961866  |
| H  | -0.661779 | 0.415301  | 2.294931  |
| C  | 1.113037  | 0.445600  | -0.711286 |
| H  | 1.677646  | 1.377126  | -0.708492 |
| H  | 0.850169  | 0.257268  | -1.752693 |
| C  | 1.287482  | -0.469947 | 2.077296  |
| H  | 1.583378  | -0.289142 | 3.116841  |
| H  | 0.877406  | -1.484285 | 2.044517  |
| C  | 2.100896  | -0.625546 | -0.250160 |
| H  | 1.706280  | -1.635003 | -0.363164 |
| C  | 2.556816  | -0.482867 | 1.206939  |
| Cl | 3.432458  | 1.135684  | 1.443638  |
| C  | 3.524120  | -1.578024 | 1.649842  |
| H  | 3.049358  | -2.559146 | 1.522481  |
| H  | 3.782520  | -1.453890 | 2.705143  |
| H  | 4.438353  | -1.557204 | 1.054042  |
| Br | 3.631258  | -0.638348 | -1.531761 |

SCF Energy (PCM/mPW1PW91/6-31+G\*\*) =  
-6264.56125328

Number of imaginary frequencies = 0

## 1i\_C003

## B3LYP/6-31G\* Geometry

|    |           |           |           |
|----|-----------|-----------|-----------|
| C  | 1.392537  | -0.687317 | 1.198236  |
| C  | 3.496356  | -0.840777 | -0.282332 |
| C  | 0.412842  | -1.045309 | -0.027680 |
| C  | 2.719607  | -0.019804 | 0.745034  |
| H  | 3.906487  | -1.704294 | 0.261186  |
| H  | 3.341091  | 0.180317  | 1.618623  |
| C  | 2.577005  | -1.328936 | -1.361607 |
| H  | 3.085261  | -1.643572 | -2.271700 |
| C  | 1.245778  | -1.458462 | -1.271770 |
| O  | 4.652022  | -0.192975 | -0.783736 |
| H  | 4.354240  | 0.646406  | -1.177712 |
| Br | 2.500892  | 1.849094  | 0.010659  |
| C  | 1.848590  | -1.988284 | 1.923091  |
| H  | 2.673172  | -1.770959 | 2.611754  |
| H  | 2.181605  | -2.763829 | 1.227800  |
| H  | 1.032954  | -2.401462 | 2.523587  |
| C  | 0.785986  | 0.223163  | 2.289913  |
| H  | 1.531571  | 0.374052  | 3.080302  |
| H  | -0.089800 | -0.224090 | 2.766346  |
| H  | 0.522867  | 1.212364  | 1.910702  |
| C  | 0.526086  | -2.068794 | -2.464257 |
| H  | 1.155144  | -1.999768 | -3.356378 |
| H  | -0.429083 | -1.586081 | -2.694003 |
| H  | 0.309177  | -3.132589 | -2.303678 |
| C  | -0.550324 | -2.236648 | 0.293667  |
| H  | -0.954297 | -2.598779 | -0.652911 |
| H  | -0.001622 | -3.079588 | 0.720238  |
| C  | -0.497615 | 0.157721  | -0.482351 |
| H  | -0.848990 | -0.040636 | -1.496992 |
| H  | 0.090063  | 1.072023  | -0.540599 |
| C  | -1.764929 | -1.917096 | 1.173515  |
| H  | -2.380947 | -2.817125 | 1.279733  |
| H  | -1.465958 | -1.627912 | 2.188680  |
| C  | -1.742742 | 0.424384  | 0.368907  |
| H  | -1.482669 | 0.817800  | 1.349687  |
| C  | -2.651967 | -0.785078 | 0.615863  |
| Cl | -3.381420 | -1.370919 | -0.985166 |
| C  | -3.821011 | -0.477325 | 1.548718  |
| H  | -3.435177 | -0.135543 | 2.517668  |
| H  | -4.423894 | -1.374590 | 1.714118  |
| H  | -4.456532 | 0.307507  | 1.134190  |
| Br | -2.723860 | 1.963224  | -0.439077 |

SCF Energy (PCM/mPW1PW91/6-31+G\*\*) =  
-6264.56645389

Number of imaginary frequencies = 0

## 1i\_C004

## B3LYP/6-31G\* Geometry

|    |           |           |           |
|----|-----------|-----------|-----------|
| C  | -1.337048 | -0.418044 | -0.242170 |
| C  | -3.151660 | 1.457809  | -0.028847 |
| C  | -0.181512 | 0.634905  | 0.143039  |
| C  | -2.649649 | 0.081156  | 0.424304  |
| H  | -3.865232 | 1.809587  | 0.724703  |
| H  | -2.510288 | 0.115568  | 1.505322  |
| C  | -1.992913 | 2.407189  | -0.116397 |
| H  | -2.276566 | 3.450269  | -0.248847 |
| C  | -0.692055 | 2.080633  | -0.100115 |
| O  | -3.911098 | 1.472808  | -1.236116 |
| H  | -3.295427 | 1.353446  | -1.975136 |
| Br | -4.166874 | -1.211702 | 0.251375  |
| C  | -1.053518 | -1.846134 | 0.272356  |
| H  | -1.821495 | -2.527263 | -0.100222 |
| H  | -1.078908 | -1.908112 | 1.364604  |
| H  | -0.090068 | -2.221975 | -0.077876 |
| C  | -1.512818 | -0.513870 | -1.777962 |
| H  | -2.487146 | -0.955408 | -2.007332 |
| H  | -0.750590 | -1.159885 | -2.224379 |
| H  | -1.440497 | 0.460589  | -2.273406 |
| C  | 0.317740  | 3.203743  | -0.249658 |
| H  | -0.172211 | 4.171982  | -0.113732 |
| H  | 0.778420  | 3.209652  | -1.245606 |
| H  | 1.136020  | 3.137404  | 0.475990  |
| C  | 0.225303  | 0.586930  | 1.660205  |
| H  | 0.615660  | 1.571871  | 1.932856  |
| H  | -0.664274 | 0.445604  | 2.282541  |
| C  | 1.115664  | 0.428275  | -0.720544 |
| H  | 1.676846  | 1.361605  | -0.737094 |
| H  | 0.858488  | 0.217139  | -1.759524 |
| C  | 1.283115  | -0.447978 | 2.080050  |
| H  | 1.571783  | -0.257623 | 3.119868  |
| H  | 0.874767  | -1.463479 | 2.053369  |
| C  | 2.108353  | -0.630438 | -0.239083 |
| H  | 1.720671  | -1.643896 | -0.338327 |
| C  | 2.557698  | -0.465560 | 1.217342  |
| Cl | 3.423421  | 1.159810  | 1.435448  |
| C  | 3.528213  | -1.550413 | 1.678197  |
| H  | 3.058052  | -2.535299 | 1.563384  |
| H  | 3.783183  | -1.410348 | 2.732287  |
| H  | 4.444094  | -1.533978 | 1.084732  |
| Br | 3.642184  | -0.652180 | -1.515836 |

SCF Energy (PCM/mPW1PW91/6-31+G\*\*) =  
-6264.56308093

Number of imaginary frequencies = 0

## 1i\_C005

## B3LYP/6-31G\* Geometry

|    |           |           |           |
|----|-----------|-----------|-----------|
| C  | -1.403578 | -0.493584 | -0.298282 |
| C  | -3.093365 | 1.474855  | -0.049458 |
| C  | -0.202174 | 0.558333  | -0.092467 |
| C  | -2.596055 | 0.111461  | 0.471466  |
| H  | -3.614920 | 1.972474  | 0.785856  |
| H  | -2.348142 | 0.202947  | 1.528012  |
| C  | -1.938035 | 2.324305  | -0.505906 |
| H  | -2.235195 | 3.311732  | -0.853626 |
| C  | -0.659742 | 1.938323  | -0.618630 |
| O  | -3.971196 | 1.396012  | -1.167401 |
| H  | -4.703616 | 0.808460  | -0.908736 |
| Br | -4.187662 | -1.122908 | 0.570783  |
| C  | -1.053638 | -1.889313 | 0.262624  |
| H  | -1.867634 | -2.586034 | 0.047550  |
| H  | -0.908774 | -1.898189 | 1.347954  |
| H  | -0.152768 | -2.290465 | -0.212285 |
| C  | -1.752846 | -0.676617 | -1.794030 |
| H  | -2.681318 | -1.249468 | -1.875882 |
| H  | -0.974523 | -1.242933 | -2.314740 |
| H  | -1.906773 | 0.271479  | -2.309723 |
| C  | 0.327542  | 2.892811  | -1.256841 |
| H  | -0.120524 | 3.885096  | -1.362864 |
| H  | 0.608262  | 2.554929  | -2.263341 |
| H  | 1.261090  | 3.000553  | -0.695419 |
| C  | 0.145230  | 0.731739  | 1.433864  |
| H  | -0.581879 | 1.398781  | 1.904897  |
| H  | 0.061043  | -0.229194 | 1.952094  |
| C  | 1.088720  | 0.040507  | -0.825183 |
| H  | 1.590706  | 0.847717  | -1.360646 |
| H  | 0.832434  | -0.703800 | -1.578899 |
| C  | 1.544009  | 1.314271  | 1.696510  |
| H  | 1.604476  | 2.318041  | 1.274221  |
| H  | 1.687306  | 1.429986  | 2.776907  |
| C  | 2.102937  | -0.570624 | 0.140096  |
| H  | 1.641068  | -1.358288 | 0.735952  |
| C  | 2.706490  | 0.438394  | 1.132568  |
| Cl | 3.889411  | 1.563540  | 0.255431  |
| C  | 3.493352  | -0.257308 | 2.242016  |
| H  | 2.812165  | -0.888140 | 2.828297  |
| H  | 3.942486  | 0.479071  | 2.913740  |
| H  | 4.281414  | -0.889526 | 1.826663  |
| Br | 3.478236  | -1.577630 | -0.879903 |

SCF Energy (PCM/mPW1PW91/6-31+G\*\*) =  
-6264.55994675

Number of imaginary frequencies = 0

## 1h\_C006

## B3LYP/6-31G\* Geometry

|    |           |           |           |
|----|-----------|-----------|-----------|
| C  | -1.493175 | 0.458587  | 1.318369  |
| C  | -3.478972 | 0.890148  | -0.254175 |
| C  | -0.437376 | 1.053682  | 0.271779  |
| C  | -2.767769 | -0.119569 | 0.651255  |
| H  | -3.979184 | 1.600449  | 0.420017  |
| H  | -3.449230 | -0.479199 | 1.422871  |
| C  | -2.493693 | 1.645631  | -1.099203 |
| H  | -2.946704 | 2.173679  | -1.936770 |
| C  | -1.178354 | 1.779054  | -0.872311 |
| O  | -4.550584 | 0.345647  | -1.002559 |
| H  | -4.183147 | -0.388640 | -1.526174 |
| Br | -2.482095 | -1.823646 | -0.394607 |
| C  | -2.036715 | 1.599748  | 2.234930  |
| H  | -2.906461 | 1.250610  | 2.802988  |
| H  | -2.333326 | 2.486655  | 1.668654  |
| H  | -1.283898 | 1.905253  | 2.965512  |
| C  | -0.900322 | -0.616689 | 2.253917  |
| H  | -1.675724 | -0.962607 | 2.947646  |
| H  | -0.086410 | -0.215355 | 2.866287  |
| H  | -0.535021 | -1.493279 | 1.714381  |
| C  | -0.389710 | 2.674893  | -1.806697 |
| H  | -1.021771 | 3.005896  | -2.635758 |
| H  | 0.486634  | 2.178200  | -2.237560 |
| H  | -0.028507 | 3.576247  | -1.295427 |
| C  | 0.523816  | 2.039072  | 1.034161  |
| H  | 0.057907  | 3.026408  | 1.119604  |
| H  | 0.652305  | 1.685167  | 2.062619  |
| C  | 0.468118  | -0.059845 | -0.385443 |
| H  | 0.730061  | 0.228317  | -1.407715 |
| H  | -0.078893 | -0.993927 | -0.473203 |
| C  | 1.926976  | 2.221509  | 0.423427  |
| H  | 1.851109  | 2.693481  | -0.553696 |
| H  | 2.494553  | 2.915784  | 1.054144  |
| C  | 1.767299  | -0.279566 | 0.383363  |
| H  | 1.567760  | -0.429988 | 1.443512  |
| C  | 2.746555  | 0.901417  | 0.282061  |
| Cl | 3.548449  | 0.926526  | -1.389456 |
| C  | 3.869428  | 0.797662  | 1.312328  |
| H  | 3.441328  | 0.853299  | 2.322113  |
| H  | 4.579180  | 1.620921  | 1.194977  |
| H  | 4.402875  | -0.150798 | 1.213701  |
| Br | 2.584065  | -2.019700 | -0.119624 |

SCF Energy (PCM/mPW1PW91/6-31+G\*\*) =  
-6264.56006666

Number of imaginary frequencies = 0

**1i\_C007****B3LYP/6-31G\* Geometry**

|    |           |           |           |
|----|-----------|-----------|-----------|
| C  | 1.397829  | -0.671111 | 1.198147  |
| C  | 3.490226  | -0.831608 | -0.268936 |
| C  | 0.417159  | -1.040139 | -0.024192 |
| C  | 2.719913  | 0.010261  | 0.734696  |
| H  | 3.867174  | -1.703794 | 0.295773  |
| H  | 3.341606  | 0.204078  | 1.609857  |
| C  | 2.579510  | -1.315096 | -1.357134 |
| H  | 3.077572  | -1.629229 | -2.275313 |
| C  | 1.250150  | -1.455170 | -1.267187 |
| O  | 4.610307  | -0.096636 | -0.747460 |
| H  | 5.087032  | -0.668257 | -1.369541 |
| Br | 2.486698  | 1.859266  | 0.002976  |
| C  | 1.850318  | -1.965259 | 1.935699  |
| H  | 2.675523  | -1.741172 | 2.621519  |
| H  | 2.182028  | -2.750655 | 1.250612  |
| H  | 1.034388  | -2.371293 | 2.541045  |
| C  | 0.788030  | 0.245927  | 2.282730  |
| H  | 1.533142  | 0.402213  | 3.072594  |
| H  | -0.087388 | -0.199783 | 2.761429  |
| H  | 0.527529  | 1.232526  | 1.896213  |
| C  | 0.533319  | -2.071860 | -2.457806 |
| H  | 1.160889  | -2.003205 | -3.351227 |
| H  | -0.423180 | -1.592655 | -2.688329 |
| H  | 0.319250  | -3.135691 | -2.293405 |
| C  | -0.540685 | -2.233996 | 0.303181  |
| H  | -0.945215 | -2.602218 | -0.640940 |
| H  | 0.011445  | -3.072808 | 0.733604  |
| C  | -0.497724 | 0.157131  | -0.485980 |
| H  | -0.849194 | -0.046956 | -1.499440 |
| H  | 0.088881  | 1.071965  | -0.546767 |
| C  | -1.754799 | -1.914246 | 1.183551  |
| H  | -2.367344 | -2.815886 | 1.296374  |
| H  | -1.454205 | -1.617909 | 2.196088  |
| C  | -1.742934 | 0.422855  | 0.365077  |
| H  | -1.482647 | 0.823925  | 1.342680  |
| C  | -2.646834 | -0.788651 | 0.621344  |
| Cl | -3.377694 | -1.387775 | -0.975130 |
| C  | -3.815524 | -0.480046 | 1.554273  |
| H  | -3.429118 | -0.131046 | 2.520416  |
| H  | -4.414831 | -1.378530 | 1.726044  |
| H  | -4.454390 | 0.300159  | 1.136193  |
| Br | -2.733222 | 1.951521  | -0.451072 |

**SCF Energy (PCM/mPW1PW91/6-31+G\*\*) =  
-6264.56110807**

**Number of imaginary frequencies = 0**

**1i\_C008****B3LYP/6-31G\* Geometry**

|    |           |           |           |
|----|-----------|-----------|-----------|
| C  | 1.551641  | -0.294129 | 0.616210  |
| C  | 2.845772  | 1.353153  | -0.927922 |
| C  | 0.143942  | 0.189819  | -0.038130 |
| C  | 2.614626  | -0.096551 | -0.484944 |
| H  | 3.314451  | 1.320743  | -1.926043 |
| H  | 2.360139  | -0.699135 | -1.357075 |
| C  | 1.530588  | 2.066602  | -1.020886 |
| H  | 1.605381  | 3.069407  | -1.436403 |
| C  | 0.336888  | 1.621007  | -0.602186 |
| O  | 3.664300  | 2.121041  | -0.052454 |
| H  | 4.510565  | 1.645427  | 0.026328  |
| Br | 4.420821  | -0.861569 | -0.002848 |
| C  | 1.547232  | -1.782407 | 1.036566  |
| H  | 2.476551  | -2.008946 | 1.563752  |
| H  | 1.491567  | -2.472290 | 0.188616  |
| H  | 0.729368  | -2.016654 | 1.723410  |
| C  | 1.888648  | 0.539163  | 1.875295  |
| H  | 2.917019  | 0.328976  | 2.183064  |
| H  | 1.233954  | 0.267136  | 2.709226  |
| H  | 1.812453  | 1.612732  | 1.700479  |
| C  | -0.839402 | 2.552908  | -0.770652 |
| H  | -0.508869 | 3.488827  | -1.230597 |
| H  | -1.313294 | 2.797523  | 0.183906  |
| H  | -1.628639 | 2.131170  | -1.400280 |
| C  | -0.252132 | -0.740606 | -1.243476 |
| H  | 0.226944  | -0.366611 | -2.153630 |
| H  | 0.148095  | -1.744893 | -1.083771 |
| C  | -0.937886 | 0.115203  | 1.109919  |
| H  | -0.967602 | 1.060092  | 1.656515  |
| H  | -0.589169 | -0.618538 | 1.839818  |
| C  | -1.758152 | -0.883680 | -1.527159 |
| H  | -2.196753 | 0.063486  | -1.855277 |
| H  | -1.898190 | -1.599658 | -2.344115 |
| C  | -2.405389 | -0.320083 | 0.829940  |
| H  | -2.818647 | -0.728428 | 1.752272  |
| C  | -2.520538 | -1.369575 | -0.293139 |
| Cl | -4.280251 | -1.642541 | -0.778196 |
| C  | -2.044143 | -2.736789 | 0.222586  |
| H  | -1.017154 | -2.698149 | 0.591942  |
| H  | -2.088904 | -3.475182 | -0.583295 |
| H  | -2.688639 | -3.080735 | 1.036396  |
| Br | -3.617133 | 1.244265  | 0.550608  |

**SCF Energy (PCM/mPW1PW91/6-31+G\*\*) =  
-6264.55122201**

**Number of imaginary frequencies = 0**

## 1i\_C009

## B3LYP/6-31G\* Geometry

|    |           |           |           |
|----|-----------|-----------|-----------|
| C  | -1.413803 | -0.490335 | -0.300950 |
| C  | -3.101784 | 1.469588  | -0.060734 |
| C  | -0.207425 | 0.549940  | -0.085105 |
| C  | -2.622114 | 0.110559  | 0.459582  |
| H  | -3.661561 | 1.961497  | 0.751071  |
| H  | -2.363320 | 0.224385  | 1.511218  |
| C  | -1.933027 | 2.327240  | -0.476792 |
| H  | -2.204602 | 3.339124  | -0.783233 |
| C  | -0.654669 | 1.939324  | -0.593509 |
| O  | -3.980570 | 1.278863  | -1.175716 |
| H  | -4.165432 | 2.154955  | -1.549587 |
| Br | -4.184713 | -1.130898 | 0.577798  |
| C  | -1.074482 | -1.888574 | 0.260891  |
| H  | -1.882022 | -2.584321 | 0.022304  |
| H  | -0.958887 | -1.903583 | 1.349590  |
| H  | -0.160416 | -2.284210 | -0.193392 |
| C  | -1.745648 | -0.673957 | -1.800889 |
| H  | -2.700519 | -1.198795 | -1.892260 |
| H  | -0.985489 | -1.281289 | -2.302410 |
| H  | -1.843427 | 0.274883  | -2.329619 |
| C  | 0.340742  | 2.901452  | -1.206393 |
| H  | -0.097406 | 3.900709  | -1.289714 |
| H  | 0.620641  | 2.584277  | -2.219953 |
| H  | 1.274384  | 2.986837  | -0.641882 |
| C  | 0.138770  | 0.706485  | 1.443221  |
| H  | -0.590055 | 1.366003  | 1.921922  |
| H  | 0.052726  | -0.261458 | 1.947267  |
| C  | 1.082526  | 0.035230  | -0.822597 |
| H  | 1.582093  | 0.842576  | -1.360210 |
| H  | 0.823702  | -0.709337 | -1.575039 |
| C  | 1.536417  | 1.284850  | 1.720439  |
| H  | 1.596833  | 2.299597  | 1.325136  |
| H  | 1.677453  | 1.373042  | 2.803778  |
| C  | 2.101777  | -0.576612 | 0.136926  |
| H  | 1.645444  | -1.372478 | 0.726230  |
| C  | 2.702547  | 0.425792  | 1.137242  |
| Cl | 3.869907  | 1.571628  | 0.264362  |
| C  | 3.503711  | -0.274755 | 2.233211  |
| H  | 2.832821  | -0.920466 | 2.815059  |
| H  | 3.948059  | 0.458251  | 2.911826  |
| H  | 4.296513  | -0.892804 | 1.805839  |
| Br | 3.481781  | -1.565769 | -0.895216 |

SCF Energy (PCM/mPW1PW91/6-31+G\*\*) =  
-6264.55548204

Number of imaginary frequencies = 0

## 1i\_C010

## B3LYP/6-31G\* Geometry

|    |           |           |           |
|----|-----------|-----------|-----------|
| C  | 1.668690  | 1.461391  | 0.278614  |
| C  | 3.153796  | -0.411385 | 1.225485  |
| C  | 0.309496  | 0.663682  | 0.630523  |
| C  | 2.880600  | 0.524988  | 0.043575  |
| H  | 3.672090  | 0.207644  | 1.973854  |
| H  | 3.766227  | 1.124151  | -0.171682 |
| C  | 1.885146  | -0.904033 | 1.858552  |
| H  | 2.053689  | -1.667915 | 2.616003  |
| C  | 0.644465  | -0.418047 | 1.692009  |
| O  | 4.089700  | -1.439461 | 0.956333  |
| H  | 3.734871  | -1.953805 | 0.209805  |
| Br | 2.781232  | -0.571262 | -1.651366 |
| C  | 2.079858  | 2.343535  | 1.498377  |
| H  | 3.099110  | 2.724217  | 1.366430  |
| H  | 2.037968  | 1.796122  | 2.442974  |
| H  | 1.423951  | 3.214111  | 1.582174  |
| C  | 1.562431  | 2.423169  | -0.926486 |
| H  | 2.463942  | 3.045914  | -0.965396 |
| H  | 0.710824  | 3.104199  | -0.838045 |
| H  | 1.498281  | 1.902592  | -1.884088 |
| C  | -0.425176 | -0.923742 | 2.639314  |
| H  | -1.279076 | -1.359325 | 2.118927  |
| H  | -0.803435 | -0.118584 | 3.282251  |
| H  | -0.007028 | -1.690956 | 3.297465  |
| C  | -0.720976 | 1.696154  | 1.202386  |
| H  | -0.498223 | 1.892136  | 2.255935  |
| H  | -0.583697 | 2.654641  | 0.693496  |
| C  | -0.278883 | 0.008707  | -0.681861 |
| H  | 0.203538  | -0.950372 | -0.862385 |
| H  | 0.007572  | 0.640642  | -1.525163 |
| C  | -2.214472 | 1.329479  | 1.090974  |
| H  | -2.465163 | 0.474046  | 1.721372  |
| H  | -2.811752 | 2.175048  | 1.449629  |
| C  | -1.799916 | -0.190022 | -0.862079 |
| H  | -2.000311 | -0.342973 | -1.922882 |
| C  | -2.621561 | 1.003056  | -0.346803 |
| Cl | -4.426966 | 0.622199  | -0.359560 |
| C  | -2.460182 | 2.192551  | -1.308110 |
| H  | -1.412969 | 2.489121  | -1.411927 |
| H  | -3.024000 | 3.052001  | -0.933979 |
| H  | -2.843288 | 1.938225  | -2.300358 |
| Br | -2.392152 | -1.949009 | -0.118331 |

SCF Energy (PCM/mPW1PW91/6-31+G\*\*) =  
-6264.55385286

Number of imaginary frequencies = 0



## 1i\_C011

## B3LYP/6-31G\* Geometry

|    |           |           |           |
|----|-----------|-----------|-----------|
| C  | 1.569112  | 0.301260  | -0.618442 |
| C  | 2.811178  | -1.325568 | 0.995156  |
| C  | 0.164342  | -0.058794 | 0.092984  |
| C  | 2.658222  | 0.103226  | 0.457851  |
| H  | 3.345956  | -1.254227 | 1.957201  |
| H  | 2.485661  | 0.773920  | 1.299606  |
| C  | 1.453812  | -1.917628 | 1.233706  |
| H  | 1.467633  | -2.867294 | 1.764894  |
| C  | 0.281502  | -1.407268 | 0.832784  |
| O  | 3.515793  | -2.216111 | 0.136867  |
| H  | 4.386903  | -1.812316 | -0.026808 |
| Br | 4.486399  | 0.710365  | -0.147251 |
| C  | 1.596702  | 1.766689  | -1.107636 |
| H  | 2.522559  | 1.955321  | -1.656103 |
| H  | 1.557275  | 2.488453  | -0.285405 |
| H  | 0.768217  | 1.982772  | -1.789934 |
| C  | 1.842408  | -0.615789 | -1.835358 |
| H  | 2.874772  | -0.473791 | -2.167429 |
| H  | 1.191785  | -0.362414 | -2.677648 |
| H  | 1.717886  | -1.672698 | -1.595943 |
| C  | -0.986269 | -2.150123 | 1.186183  |
| H  | -0.747729 | -3.081767 | 1.707490  |
| H  | -1.586653 | -2.400808 | 0.306264  |
| H  | -1.637951 | -1.556529 | 1.835760  |
| C  | -0.231788 | 1.033188  | 1.153161  |
| H  | -0.616480 | 0.539788  | 2.049173  |
| H  | 0.654132  | 1.581932  | 1.483342  |
| C  | -0.919164 | -0.133368 | -1.043488 |
| H  | -0.976865 | -1.151917 | -1.428938 |
| H  | -0.544207 | 0.459041  | -1.879658 |
| C  | -1.286070 | 2.047827  | 0.694343  |
| H  | -1.457461 | 2.787288  | 1.484522  |
| H  | -0.936023 | 2.603527  | -0.185950 |
| C  | -2.364825 | 0.406815  | -0.839178 |
| H  | -2.606126 | 0.970776  | -1.740626 |
| C  | -2.627004 | 1.399395  | 0.324441  |
| Cl | -3.293856 | 0.591834  | 1.851582  |
| C  | -3.683378 | 2.428495  | -0.083971 |
| H  | -3.314301 | 3.023315  | -0.929069 |
| H  | -3.907153 | 3.106028  | 0.744023  |
| H  | -4.606650 | 1.926742  | -0.387774 |
| Br | -3.738932 | -1.029438 | -0.970122 |

SCF Energy (PCM/mPW1PW91/6-31+G\*\*) =  
-6264.55214308

Number of imaginary frequencies = 0

## 1i\_C012

## B3LYP/6-31G\* Geometry

|    |           |           |           |
|----|-----------|-----------|-----------|
| C  | -1.500034 | 0.443012  | 1.315195  |
| C  | -3.472870 | 0.880788  | -0.246086 |
| C  | -0.441043 | 1.046751  | 0.276516  |
| C  | -2.768615 | -0.144390 | 0.633845  |
| H  | -3.948410 | 1.594309  | 0.451632  |
| H  | -3.452236 | -0.495527 | 1.407773  |
| C  | -2.492845 | 1.636272  | -1.096355 |
| H  | -2.933439 | 2.171592  | -1.938564 |
| C  | -1.179825 | 1.776987  | -0.865227 |
| O  | -4.502078 | 0.245855  | -0.995111 |
| H  | -4.958653 | 0.935934  | -1.501524 |
| Br | -2.470021 | -1.832425 | -0.399785 |
| C  | -2.041181 | 1.575843  | 2.242173  |
| H  | -2.917039 | 1.224026  | 2.799099  |
| H  | -2.328732 | 2.473115  | 1.687244  |
| H  | -1.292355 | 1.867882  | 2.982574  |
| C  | -0.905789 | -0.637660 | 2.243581  |
| H  | -1.681078 | -0.986954 | 2.935813  |
| H  | -0.091539 | -0.239102 | 2.857548  |
| H  | -0.544071 | -1.511507 | 1.698234  |
| C  | -0.392024 | 2.679941  | -1.793040 |
| H  | -1.021015 | 3.012412  | -2.624162 |
| H  | 0.487402  | 2.187714  | -2.222173 |
| H  | -0.035772 | 3.580085  | -1.276217 |
| C  | 0.515291  | 2.029920  | 1.047578  |
| H  | 0.046185  | 3.015201  | 1.140524  |
| H  | 0.642500  | 1.667943  | 2.073246  |
| C  | 0.468055  | -0.060535 | -0.387180 |
| H  | 0.729135  | 0.232815  | -1.408186 |
| H  | -0.078742 | -0.994622 | -0.478484 |
| C  | 1.919238  | 2.222175  | 0.442041  |
| H  | 1.844837  | 2.703924  | -0.530465 |
| H  | 2.483541  | 2.911575  | 1.081103  |
| C  | 1.767411  | -0.279497 | 0.380945  |
| H  | 1.567267  | -0.438692 | 1.439746  |
| C  | 2.742658  | 0.905664  | 0.289420  |
| Cl | 3.544576  | 0.948353  | -1.382149 |
| C  | 3.866447  | 0.797418  | 1.318259  |
| H  | 3.438411  | 0.842176  | 2.328614  |
| H  | 4.572892  | 1.624560  | 1.208060  |
| H  | 4.403464  | -0.148050 | 1.210954  |
| Br | 2.593365  | -2.012025 | -0.133785 |

SCF Energy (PCM/mPW1PW91/6-31+G\*\*) =  
-6264.55466514

Number of imaginary frequencies = 0

## 1j\_C001

## B3LYP/6-31G\* Geometry

|    |           |           |           |
|----|-----------|-----------|-----------|
| C  | -1.423671 | -0.325370 | -0.474715 |
| C  | -3.046828 | 1.394061  | 0.631333  |
| C  | -0.176768 | 0.386026  | 0.270243  |
| C  | -2.648931 | -0.073936 | 0.429123  |
| H  | -3.650687 | 1.446427  | 1.553215  |
| H  | -2.487498 | -0.533332 | 1.404302  |
| C  | -1.817037 | 2.239644  | 0.790194  |
| H  | -2.029391 | 3.282110  | 1.019661  |
| C  | -0.548907 | 1.853092  | 0.593784  |
| O  | -3.782614 | 1.966954  | -0.443831 |
| H  | -4.556616 | 1.393081  | -0.586836 |
| Br | -4.297864 | -1.059533 | -0.189948 |
| C  | -1.227316 | -1.853653 | -0.627507 |
| H  | -1.968767 | -2.244465 | -1.328535 |
| H  | -1.364985 | -2.396139 | 0.312814  |
| H  | -0.238898 | -2.108126 | -1.018229 |
| C  | -1.633193 | 0.267594  | -1.885927 |
| H  | -2.585233 | -0.089558 | -2.289091 |
| H  | -0.841975 | -0.063708 | -2.565488 |
| H  | -1.667215 | 1.358252  | -1.882552 |
| C  | 0.520815  | 2.922568  | 0.702063  |
| H  | 0.062517  | 3.890572  | 0.923628  |
| H  | 1.078931  | 3.037280  | -0.235036 |
| H  | 1.252787  | 2.724066  | 1.493404  |
| C  | 0.155623  | -0.373457 | 1.598361  |
| H  | -0.583031 | -0.117724 | 2.365086  |
| H  | 0.073822  | -1.447985 | 1.423955  |
| C  | 1.059271  | 0.301958  | -0.688828 |
| H  | 0.963291  | 1.040670  | -1.488368 |
| H  | 1.068409  | -0.674280 | -1.175817 |
| C  | 1.552232  | -0.124354 | 2.182190  |
| H  | 1.653963  | 0.909355  | 2.536615  |
| H  | 1.695924  | -0.764832 | 3.059509  |
| C  | 2.435980  | 0.482500  | -0.041371 |
| H  | 2.601825  | 1.513826  | 0.265133  |
| C  | 2.705525  | -0.383105 | 1.193979  |
| Cl | 2.678787  | -2.176695 | 0.733960  |
| C  | 4.063988  | -0.107728 | 1.834988  |
| H  | 4.876022  | -0.316375 | 1.136087  |
| H  | 4.194883  | -0.724368 | 2.728466  |
| H  | 4.122836  | 0.947575  | 2.130421  |
| Br | 3.818604  | 0.247271  | -1.460237 |

SCF Energy (PCM/mPW1PW91/6-31+G\*\*) =  
-6264.56949361

Number of imaginary frequencies = 0

## 1j\_C002

## B3LYP/6-31G\* Geometry

|    |           |           |           |
|----|-----------|-----------|-----------|
| C  | -1.429982 | -0.313358 | -0.478027 |
| C  | -3.056595 | 1.393721  | 0.621525  |
| C  | -0.182542 | 0.383937  | 0.275585  |
| C  | -2.671829 | -0.067986 | 0.414932  |
| H  | -3.701907 | 1.449310  | 1.512788  |
| H  | -2.496076 | -0.507643 | 1.396649  |
| C  | -1.820706 | 2.225970  | 0.829455  |
| H  | -2.016917 | 3.262151  | 1.111059  |
| C  | -0.551012 | 1.845303  | 0.625694  |
| O  | -3.788744 | 1.876394  | -0.510666 |
| H  | -3.943084 | 2.824065  | -0.371196 |
| Br | -4.290194 | -1.075456 | -0.190943 |
| C  | -1.236464 | -1.841381 | -0.638860 |
| H  | -1.968615 | -2.223693 | -1.353453 |
| H  | -1.393433 | -2.390216 | 0.294617  |
| H  | -0.241954 | -2.095419 | -1.014783 |
| C  | -1.624248 | 0.285012  | -1.889338 |
| H  | -2.592240 | -0.034261 | -2.284800 |
| H  | -0.847075 | -0.073536 | -2.571656 |
| H  | -1.617557 | 1.376528  | -1.887131 |
| C  | 0.520800  | 2.908973  | 0.762820  |
| H  | 0.067268  | 3.872944  | 1.011741  |
| H  | 1.078460  | 3.046042  | -0.171652 |
| H  | 1.253129  | 2.685977  | 1.546794  |
| C  | 0.149929  | -0.394594 | 1.593150  |
| H  | -0.588543 | -0.150268 | 2.363670  |
| H  | 0.065116  | -1.465616 | 1.401165  |
| C  | 1.054462  | 0.313374  | -0.683171 |
| H  | 0.959878  | 1.062831  | -1.472935 |
| H  | 1.061472  | -0.655985 | -1.183628 |
| C  | 1.547499  | -0.159527 | 2.180870  |
| H  | 1.653126  | 0.866897  | 2.554950  |
| H  | 1.689451  | -0.816590 | 3.046143  |
| C  | 2.431508  | 0.482111  | -0.033322 |
| H  | 2.599665  | 1.508090  | 0.289757  |
| C  | 2.700384  | -0.403589 | 1.188151  |
| Cl | 2.671875  | -2.189233 | 0.699754  |
| C  | 4.059352  | -0.140130 | 1.833178  |
| H  | 4.871023  | -0.340482 | 1.131415  |
| H  | 4.188804  | -0.769957 | 2.717618  |
| H  | 4.120579  | 0.910657  | 2.143962  |
| Br | 3.814313  | 0.268512  | -1.455840 |

SCF Energy (PCM/mPW1PW91/6-31+G\*\*) =  
-6264.56499789

Number of imaginary frequencies = 0

## 1j\_C003

## B3LYP/6-31G\* Geometry

|    |           |           |           |
|----|-----------|-----------|-----------|
| C  | 1.574032  | 0.975136  | -1.053902 |
| C  | 3.419652  | 0.646233  | 0.699559  |
| C  | 0.415742  | 1.052370  | 0.061671  |
| C  | 2.801304  | 0.143051  | -0.607233 |
| H  | 3.970199  | 1.562424  | 0.439753  |
| H  | 3.548046  | 0.136265  | -1.402238 |
| C  | 2.358769  | 1.005998  | 1.700428  |
| H  | 2.743661  | 1.147971  | 2.709125  |
| C  | 1.060739  | 1.244249  | 1.455122  |
| O  | 4.424067  | -0.196589 | 1.234382  |
| H  | 4.023330  | -1.078479 | 1.336617  |
| Br | 2.444771  | -1.835812 | -0.422787 |
| C  | 2.149687  | 2.402797  | -1.310442 |
| H  | 3.077167  | 2.338690  | -1.890796 |
| H  | 2.364284  | 2.941339  | -0.383312 |
| H  | 1.449558  | 3.002857  | -1.896750 |
| C  | 1.091541  | 0.441099  | -2.421101 |
| H  | 1.860983  | 0.640582  | -3.176447 |
| H  | 0.171187  | 0.928851  | -2.753571 |
| H  | 0.923471  | -0.637505 | -2.409980 |
| C  | 0.223374  | 1.730937  | 2.622435  |
| H  | 0.823633  | 1.742839  | 3.536754  |
| H  | -0.652725 | 1.104632  | 2.819445  |
| H  | -0.142421 | 2.752595  | 2.462256  |
| C  | -0.518090 | 2.255465  | -0.310486 |
| H  | -0.041396 | 3.198002  | -0.021658 |
| H  | -0.619330 | 2.284933  | -1.398263 |
| C  | -0.444721 | -0.269447 | 0.053063  |
| H  | 0.088987  | -1.057307 | 0.582164  |
| H  | -0.563028 | -0.611409 | -0.975322 |
| C  | -1.947305 | 2.255306  | 0.254987  |
| H  | -1.951039 | 2.459627  | 1.331056  |
| H  | -2.510491 | 3.070341  | -0.213593 |
| C  | -1.853957 | -0.170576 | 0.638086  |
| H  | -1.837663 | -0.026976 | 1.718919  |
| C  | -2.726375 | 0.944451  | 0.056558  |
| Cl | -2.965639 | 0.681870  | -1.762694 |
| C  | -4.117299 | 1.022499  | 0.681447  |
| H  | -4.677105 | 0.101797  | 0.508075  |
| H  | -4.675924 | 1.864349  | 0.262788  |
| H  | -4.024724 | 1.172309  | 1.764663  |
| Br | -2.708996 | -1.968051 | 0.480498  |

SCF Energy (PCM/mPW1PW91/6-31+G\*\*) =  
-6264.56534936

Number of imaginary frequencies = 0

## 1j\_C004

## B3LYP/6-31G\* Geometry

|    |           |           |           |
|----|-----------|-----------|-----------|
| C  | -1.432088 | -0.308004 | -0.411720 |
| C  | -3.079908 | 1.437107  | 0.611694  |
| C  | -0.205634 | 0.390289  | 0.355964  |
| C  | -2.689772 | -0.036658 | 0.442019  |
| H  | -3.744370 | 1.498244  | 1.490145  |
| H  | -2.574700 | -0.481294 | 1.431121  |
| C  | -1.849013 | 2.253556  | 0.872847  |
| H  | -2.048420 | 3.285349  | 1.156007  |
| C  | -0.581996 | 1.838151  | 0.745493  |
| O  | -3.734106 | 2.018527  | -0.509539 |
| H  | -4.512724 | 1.463213  | -0.694894 |
| Br | -4.325530 | -1.007095 | -0.230031 |
| C  | -1.234962 | -1.833315 | -0.548494 |
| H  | -2.022493 | -2.249087 | -1.181674 |
| H  | -1.293034 | -2.350894 | 0.415110  |
| H  | -0.277143 | -2.080065 | -1.014910 |
| C  | -1.595209 | 0.280717  | -1.832336 |
| H  | -2.531601 | -0.081303 | -2.266641 |
| H  | -0.781079 | -0.046680 | -2.485405 |
| H  | -1.634333 | 1.370930  | -1.830749 |
| C  | 0.520596  | 2.831295  | 1.058156  |
| H  | 0.094124  | 3.814923  | 1.273419  |
| H  | 1.227077  | 2.952643  | 0.229404  |
| H  | 1.108111  | 2.537930  | 1.938905  |
| C  | 0.198660  | -0.349048 | 1.685920  |
| H  | 0.571777  | 0.396128  | 2.398231  |
| H  | -0.686555 | -0.777179 | 2.166933  |
| C  | 1.043065  | 0.392677  | -0.594335 |
| H  | 1.027999  | 1.274024  | -1.237896 |
| H  | 1.020994  | -0.473077 | -1.260407 |
| C  | 1.252710  | -1.464919 | 1.545790  |
| H  | 1.476872  | -1.865303 | 2.541410  |
| H  | 0.838828  | -2.291195 | 0.970862  |
| C  | 2.357140  | 0.334887  | 0.181543  |
| H  | 2.385371  | 1.096773  | 0.958582  |
| C  | 2.593009  | -1.013946 | 0.882774  |
| Cl | 3.056956  | -2.304766 | -0.364947 |
| C  | 3.740441  | -0.935429 | 1.888290  |
| H  | 4.658811  | -0.588582 | 1.408754  |
| H  | 3.921641  | -1.913314 | 2.342151  |
| H  | 3.475560  | -0.229314 | 2.686533  |
| Br | 3.867863  | 0.888974  | -0.983004 |

SCF Energy (PCM/mPW1PW91/6-31+G\*\*) =  
-6264.56152036

Number of imaginary frequencies = 0

## 1j\_C005

## B3LYP/6-31G\* Geometry

|    |           |           |           |
|----|-----------|-----------|-----------|
| C  | 1.577663  | 0.952641  | -1.061939 |
| C  | 3.419956  | 0.651784  | 0.674550  |
| C  | 0.419531  | 1.041659  | 0.053871  |
| C  | 2.802121  | 0.111224  | -0.607564 |
| H  | 3.939003  | 1.583578  | 0.383892  |
| H  | 3.547292  | 0.108953  | -1.404376 |
| C  | 2.366651  | 1.004283  | 1.684781  |
| H  | 2.742558  | 1.155108  | 2.697833  |
| C  | 1.067605  | 1.238877  | 1.445021  |
| O  | 4.393212  | -0.261848 | 1.166679  |
| H  | 4.812183  | 0.150724  | 1.938353  |
| Br | 2.439769  | -1.846204 | -0.409326 |
| C  | 2.146799  | 2.378443  | -1.338935 |
| H  | 3.077450  | 2.307752  | -1.913507 |
| H  | 2.354872  | 2.935763  | -0.421101 |
| H  | 1.447754  | 2.966404  | -1.938993 |
| C  | 1.090955  | 0.403901  | -2.421505 |
| H  | 1.856667  | 0.599663  | -3.181793 |
| H  | 0.167630  | 0.885978  | -2.754464 |
| H  | 0.929831  | -0.675216 | -2.397430 |
| C  | 0.233300  | 1.723900  | 2.614997  |
| H  | 0.834618  | 1.736347  | 3.528893  |
| H  | -0.640524 | 1.095361  | 2.813254  |
| H  | -0.135053 | 2.744754  | 2.456037  |
| C  | -0.508759 | 2.247607  | -0.322373 |
| H  | -0.025852 | 3.189981  | -0.043117 |
| H  | -0.613840 | 2.268650  | -1.409960 |
| C  | -0.449095 | -0.274785 | 0.052483  |
| H  | 0.082351  | -1.065431 | 0.579488  |
| H  | -0.571219 | -0.617213 | -0.975123 |
| C  | -1.935843 | 2.260163  | 0.248181  |
| H  | -1.934927 | 2.469574  | 1.323343  |
| H  | -2.495128 | 3.076844  | -0.222306 |
| C  | -1.856776 | -0.165485 | 0.639995  |
| H  | -1.838362 | -0.020254 | 1.720636  |
| C  | -2.724428 | 0.953614  | 0.058528  |
| Cl | -2.974564 | 0.687178  | -1.758634 |
| C  | -4.111923 | 1.043248  | 0.689516  |
| H  | -4.678214 | 0.125427  | 0.522091  |
| H  | -4.667083 | 1.887173  | 0.270355  |
| H  | -4.013378 | 1.196337  | 1.771795  |
| Br | -2.725006 | -1.957222 | 0.488237  |

SCF Energy (PCM/mPW1PW91/6-31+G\*\*) =  
-6264.55988488

Number of imaginary frequencies = 0

## 1j\_C006

## B3LYP/6-31G\* Geometry

|    |           |           |           |
|----|-----------|-----------|-----------|
| C  | -1.438337 | -0.297714 | -0.417510 |
| C  | -3.086174 | 1.441735  | 0.593418  |
| C  | -0.210780 | 0.390799  | 0.354207  |
| C  | -2.709929 | -0.027009 | 0.425935  |
| H  | -3.784414 | 1.512327  | 1.442717  |
| H  | -2.578384 | -0.446574 | 1.423765  |
| C  | -1.851150 | 2.246313  | 0.891596  |
| H  | -2.038643 | 3.271157  | 1.216607  |
| C  | -0.582441 | 1.835406  | 0.758212  |
| O  | -3.741221 | 1.925987  | -0.583408 |
| H  | -3.879357 | 2.878893  | -0.464382 |
| Br | -4.318271 | -1.024488 | -0.220616 |
| C  | -1.244518 | -1.823544 | -0.554600 |
| H  | -2.028271 | -2.235110 | -1.194201 |
| H  | -1.314025 | -2.342910 | 0.407274  |
| H  | -0.282717 | -2.070772 | -1.012837 |
| C  | -1.588484 | 0.287983  | -1.841008 |
| H  | -2.546834 | -0.029326 | -2.260611 |
| H  | -0.795093 | -0.079130 | -2.498960 |
| H  | -1.576210 | 1.379119  | -1.847104 |
| C  | 0.520542  | 2.822844  | 1.085787  |
| H  | 0.096870  | 3.804447  | 1.316762  |
| H  | 1.226859  | 2.954723  | 0.258341  |
| H  | 1.108230  | 2.515138  | 1.961171  |
| C  | 0.189155  | -0.357810 | 1.680733  |
| H  | 0.560774  | 0.380483  | 2.401052  |
| H  | -0.698909 | -0.788665 | 2.153807  |
| C  | 1.040245  | 0.398236  | -0.592857 |
| H  | 1.028594  | 1.283986  | -1.230575 |
| H  | 1.016692  | -0.462337 | -1.265378 |
| C  | 1.241967  | -1.474240 | 1.535369  |
| H  | 1.463934  | -1.880585 | 2.529077  |
| H  | 0.826972  | -2.296180 | 0.955283  |
| C  | 2.352770  | 0.331752  | 0.184877  |
| H  | 2.382537  | 1.087653  | 0.967677  |
| C  | 2.584441  | -1.022472 | 0.876867  |
| Cl | 3.047311  | -2.304966 | -0.379014 |
| C  | 3.730684  | -0.953879 | 1.884545  |
| H  | 4.650860  | -0.606559 | 1.408779  |
| H  | 3.908352  | -1.935360 | 2.332011  |
| H  | 3.466727  | -0.252589 | 2.687370  |
| Br | 3.867500  | 0.891468  | -0.972829 |

SCF Energy (PCM/mPW1PW91/6-31+G\*\*) =  
-6264.55722656

Number of imaginary frequencies = 0

**1k\_C001****B3LYP/6-31G\* Geometry**

|    |           |           |           |
|----|-----------|-----------|-----------|
| C  | -1.278948 | -0.328556 | -0.436922 |
| C  | -3.229256 | 1.318265  | -0.055410 |
| C  | -0.228401 | 0.713121  | 0.204717  |
| C  | -2.642318 | -0.052898 | 0.243554  |
| H  | -3.559943 | 1.345822  | -1.106783 |
| H  | -2.585253 | -0.186231 | 1.323582  |
| C  | -2.172794 | 2.357784  | 0.157001  |
| H  | -2.557852 | 3.372212  | 0.240465  |
| C  | -0.853957 | 2.135436  | 0.226006  |
| O  | -4.323570 | 1.628599  | 0.797276  |
| H  | -5.002775 | 0.953017  | 0.625374  |
| Br | -4.072350 | -1.394457 | -0.252191 |
| C  | -0.909132 | -1.808014 | -0.199463 |
| H  | -1.604375 | -2.448158 | -0.747617 |
| H  | -0.979925 | -2.092134 | 0.854698  |
| H  | 0.094595  | -2.042318 | -0.557487 |
| C  | -1.404895 | -0.116292 | -1.964658 |
| H  | -2.309372 | -0.614312 | -2.327644 |
| H  | -0.557268 | -0.558183 | -2.496710 |
| H  | -1.463413 | 0.941739  | -2.237508 |
| C  | 0.050489  | 3.342075  | 0.397128  |
| H  | -0.541781 | 4.219204  | 0.672336  |
| H  | 0.588643  | 3.590836  | -0.526076 |
| H  | 0.807410  | 3.201335  | 1.178246  |
| C  | 0.136830  | 0.383454  | 1.695544  |
| H  | 0.436907  | 1.316755  | 2.183792  |
| H  | -0.758247 | 0.058955  | 2.236120  |
| C  | 1.106471  | 0.785629  | -0.617578 |
| H  | 1.587050  | 1.742956  | -0.413990 |
| H  | 0.901139  | 0.790748  | -1.689151 |
| C  | 1.249782  | -0.656649 | 1.935386  |
| H  | 1.490171  | -0.678362 | 3.004435  |
| H  | 0.909729  | -1.659968 | 1.675561  |
| C  | 2.167365  | -0.287408 | -0.333364 |
| H  | 1.872000  | -1.273442 | -0.681863 |
| C  | 2.546371  | -0.368488 | 1.152150  |
| Cl | 3.644427  | -1.838666 | 1.392299  |
| C  | 3.308027  | 0.842906  | 1.689513  |
| H  | 3.548069  | 0.691996  | 2.745392  |
| H  | 2.702386  | 1.751464  | 1.603488  |
| H  | 4.234075  | 0.997041  | 1.132899  |
| Br | 3.738279  | 0.115753  | -1.499252 |

**SCF Energy (PCM/mPW1PW91/6-31+G\*\*) =**  
**-6264.56668975**

**Number of imaginary frequencies = 0**

**1k\_C002****B3LYP/6-31G\* Geometry**

|    |           |           |           |
|----|-----------|-----------|-----------|
| C  | 1.422382  | 0.323039  | -0.661309 |
| C  | 2.771990  | -1.597607 | 0.386071  |
| C  | 0.047748  | -0.248980 | -0.015753 |
| C  | 2.553038  | -0.096023 | 0.299971  |
| H  | 3.248006  | -1.943036 | -0.546488 |
| H  | 2.389050  | 0.303957  | 1.300194  |
| C  | 1.449856  | -2.286339 | 0.537740  |
| H  | 1.530289  | -3.331020 | 0.831830  |
| C  | 0.239830  | -1.751842 | 0.315488  |
| O  | 3.588884  | -1.954419 | 1.495230  |
| H  | 4.447075  | -1.519059 | 1.349111  |
| Br | 4.345530  | 0.714218  | -0.173744 |
| C  | 1.431597  | 1.863187  | -0.802362 |
| H  | 2.259912  | 2.161451  | -1.449935 |
| H  | 1.579481  | 2.373281  | 0.153875  |
| H  | 0.509485  | 2.248776  | -1.243115 |
| C  | 1.658062  | -0.284283 | -2.065117 |
| H  | 2.691266  | -0.095205 | -2.373573 |
| H  | 1.006209  | 0.179189  | -2.811263 |
| H  | 1.483762  | -1.363609 | -2.088016 |
| C  | -0.953395 | -2.665921 | 0.469873  |
| H  | -0.624843 | -3.651722 | 0.812079  |
| H  | -1.493843 | -2.802776 | -0.471536 |
| H  | -1.688300 | -2.291590 | 1.188658  |
| C  | -0.259432 | 0.502758  | 1.328372  |
| H  | 0.285397  | 0.014699  | 2.142111  |
| H  | 0.118935  | 1.524538  | 1.267035  |
| C  | -1.089690 | 0.009421  | -1.077551 |
| H  | -1.161967 | -0.837191 | -1.763800 |
| H  | -0.773557 | 0.852275  | -1.695690 |
| C  | -1.735724 | 0.600978  | 1.733555  |
| H  | -2.151592 | -0.386368 | 1.969830  |
| H  | -1.815917 | 1.200176  | 2.647375  |
| C  | -2.523716 | 0.405355  | -0.651700 |
| H  | -2.982557 | 0.972845  | -1.459396 |
| C  | -2.643012 | 1.199117  | 0.660583  |
| Cl | -2.006313 | 2.908787  | 0.216493  |
| C  | -4.068974 | 1.425548  | 1.159010  |
| H  | -4.058292 | 2.138644  | 1.987705  |
| H  | -4.498862 | 0.483199  | 1.507672  |
| H  | -4.708313 | 1.822620  | 0.365329  |
| Br | -3.774042 | -1.178748 | -0.596640 |

**SCF Energy (PCM/mPW1PW91/6-31+G\*\*) =**  
**-6264.55993370**

**Number of imaginary frequencies = 0**

## 1k\_C003

## B3LYP/6-31G\* Geometry

|    |           |           |           |
|----|-----------|-----------|-----------|
| C  | -1.290391 | -0.327594 | -0.445888 |
| C  | -3.244465 | 1.314997  | -0.045405 |
| C  | -0.234916 | 0.712823  | 0.185858  |
| C  | -2.661742 | -0.065820 | 0.238612  |
| H  | -3.645040 | 1.335388  | -1.065455 |
| H  | -2.580096 | -0.209683 | 1.317900  |
| C  | -2.173592 | 2.355547  | 0.107601  |
| H  | -2.553272 | 3.375812  | 0.148930  |
| C  | -0.853702 | 2.136402  | 0.184986  |
| O  | -4.371084 | 1.617442  | 0.771977  |
| H  | -4.052616 | 1.707129  | 1.685384  |
| Br | -4.060563 | -1.415387 | -0.249645 |
| C  | -0.908706 | -1.804777 | -0.212491 |
| H  | -1.603633 | -2.449206 | -0.754698 |
| H  | -0.970475 | -2.090558 | 0.841967  |
| H  | 0.094787  | -2.030032 | -0.577112 |
| C  | -1.428295 | -0.116460 | -1.973083 |
| H  | -2.333044 | -0.620101 | -2.327046 |
| H  | -0.583161 | -0.554845 | -2.511990 |
| H  | -1.494365 | 0.940835  | -2.247350 |
| C  | 0.051957  | 3.345463  | 0.328720  |
| H  | -0.538191 | 4.229892  | 0.584898  |
| H  | 0.588683  | 3.572611  | -0.600643 |
| H  | 0.810475  | 3.219778  | 1.111016  |
| C  | 0.126460  | 0.402408  | 1.682062  |
| H  | 0.425887  | 1.341853  | 2.159667  |
| H  | -0.769946 | 0.082661  | 2.223719  |
| C  | 1.102819  | 0.770062  | -0.634547 |
| H  | 1.583387  | 1.731157  | -0.449844 |
| H  | 0.898677  | 0.753115  | -1.706211 |
| C  | 1.238030  | -0.634855 | 1.939049  |
| H  | 1.472805  | -0.645599 | 3.009537  |
| H  | 0.898883  | -1.640477 | 1.686967  |
| C  | 2.165911  | -0.295543 | -0.328851 |
| H  | 1.875520  | -1.287565 | -0.663840 |
| C  | 2.537967  | -0.353722 | 1.159314  |
| Cl | 3.638934  | -1.816247 | 1.427283  |
| C  | 3.292858  | 0.867903  | 1.682954  |
| H  | 3.527287  | 0.733873  | 2.742397  |
| H  | 2.685446  | 1.773440  | 1.579131  |
| H  | 4.221596  | 1.016201  | 1.129312  |
| Br | 3.741307  | 0.095672  | -1.492344 |

SCF Energy (PCM/mPW1PW91/6-31+G\*\*) =  
-6264.56415515

Number of imaginary frequencies = 0

## 1k\_C004

## B3LYP/6-31G\* Geometry

|    |           |           |           |
|----|-----------|-----------|-----------|
| C  | -1.278974 | -0.328472 | -0.437155 |
| C  | -3.229234 | 1.318297  | -0.055372 |
| C  | -0.228387 | 0.712986  | 0.204907  |
| C  | -2.642347 | -0.052891 | 0.243481  |
| H  | -3.559723 | 1.346016  | -1.106810 |
| H  | -2.585105 | -0.186299 | 1.323478  |
| C  | -2.172738 | 2.357723  | 0.157481  |
| H  | -2.557753 | 3.372145  | 0.241245  |
| C  | -0.853928 | 2.135277  | 0.226639  |
| O  | -4.323652 | 1.628523  | 0.797097  |
| H  | -5.002794 | 0.952834  | 0.625149  |
| Br | -4.072411 | -1.394361 | -0.252254 |
| C  | -0.909246 | -1.808010 | -0.200135 |
| H  | -1.604205 | -2.448016 | -0.748820 |
| H  | -0.980437 | -2.092521 | 0.853889  |
| H  | 0.094637  | -2.042130 | -0.557840 |
| C  | -1.405024 | -0.115670 | -1.964744 |
| H  | -2.309603 | -0.613446 | -2.327813 |
| H  | -0.557521 | -0.557450 | -2.497073 |
| H  | -1.463473 | 0.942463  | -2.237231 |
| C  | 0.050541  | 3.341871  | 0.398184  |
| H  | -0.541655 | 4.218806  | 0.674169  |
| H  | 0.588283  | 3.591129  | -0.525142 |
| H  | 0.807774  | 3.200721  | 1.178888  |
| C  | 0.136824  | 0.382806  | 1.695614  |
| H  | 0.436816  | 1.315963  | 2.184182  |
| H  | -0.758220 | 0.058031  | 2.236070  |
| C  | 1.106488  | 0.785783  | -0.617370 |
| H  | 1.587034  | 1.743106  | -0.413610 |
| H  | 0.901153  | 0.791168  | -1.688944 |
| C  | 1.249884  | -0.657294 | 1.935175  |
| H  | 1.490231  | -0.679271 | 3.004225  |
| H  | 0.909843  | -1.660561 | 1.675087  |
| C  | 2.167468  | -0.287273 | -0.333472 |
| H  | 1.872114  | -1.273222 | -0.682230 |
| C  | 2.546393  | -0.368814 | 1.152056  |
| Cl | 3.644500  | -1.839164 | 1.391775  |
| C  | 3.308091  | 0.842334  | 1.689936  |
| H  | 3.547961  | 0.691058  | 2.745811  |
| H  | 2.702553  | 1.750973  | 1.604081  |
| H  | 4.234229  | 0.996576  | 1.133525  |
| Br | 3.738288  | 0.116293  | -1.499248 |

SCF Energy (PCM/mPW1PW91/6-31+G\*\*) =  
-6264.56669081

Number of imaginary frequencies = 0

## 1k\_C005

## B3LYP/6-31G\* Geometry

|    |          |          |          |
|----|----------|----------|----------|
| C  | -1.29550 | -0.51267 | -0.46398 |
| C  | -3.18104 | 1.23944  | -0.31302 |
| C  | -0.21666 | 0.67192  | -0.30810 |
| C  | -2.54041 | -0.00670 | 0.29597  |
| H  | -3.76572 | 0.93103  | -1.19566 |
| H  | -2.31375 | 0.17917  | 1.34434  |
| C  | -2.14134 | 2.21643  | -0.78258 |
| H  | -2.54990 | 3.16500  | -1.12612 |
| C  | -0.82719 | 1.97359  | -0.88664 |
| O  | -4.03863 | 1.89433  | 0.61502  |
| H  | -4.74623 | 1.25949  | 0.82362  |
| Br | -4.01465 | -1.37892 | 0.44529  |
| C  | -0.80969 | -1.85290 | 0.12508  |
| H  | -1.59479 | -2.60489 | 0.01116  |
| H  | -0.57377 | -1.80013 | 1.19232  |
| H  | 0.06988  | -2.22242 | -0.41053 |
| C  | -1.64124 | -0.77361 | -1.95023 |
| H  | -2.53414 | -1.40414 | -2.00949 |
| H  | -0.83361 | -1.31046 | -2.45659 |
| H  | -1.83563 | 0.14647  | -2.50675 |
| C  | 0.04356  | 3.01875  | -1.55156 |
| H  | -0.53786 | 3.92494  | -1.74483 |
| H  | 0.42876  | 2.66745  | -2.51795 |
| H  | 0.91437  | 3.30822  | -0.95261 |
| C  | 0.11322  | 0.94934  | 1.20894  |
| H  | -0.64196 | 1.61590  | 1.63321  |
| H  | 0.07143  | 0.02014  | 1.78722  |
| C  | 1.12456  | 0.28257  | -1.02214 |
| H  | 1.58694  | 1.15711  | -1.48531 |
| H  | 0.94109  | -0.41728 | -1.83851 |
| C  | 1.49538  | 1.57922  | 1.41236  |
| H  | 1.56694  | 2.50684  | 0.83432  |
| H  | 1.63413  | 1.86130  | 2.45959  |
| C  | 2.14480  | -0.34158 | -0.06233 |
| H  | 1.71211  | -1.18949 | 0.45824  |
| C  | 2.67232  | 0.66496  | 0.98069  |
| Cl | 3.21017  | -0.32618 | 2.45859  |
| C  | 3.87078  | 1.50545  | 0.54670  |
| H  | 4.10293  | 2.24412  | 1.31955  |
| H  | 3.63120  | 2.03974  | -0.38090 |
| H  | 4.75079  | 0.88688  | 0.36831  |
| Br | 3.59704  | -1.19993 | -1.12237 |

SCF Energy (PCM/mPW1PW91/6-31+G\*\*) =  
-6264.56367623

Number of imaginary frequencies = 0

## 1k\_C006

## B3LYP/6-31G\* Geometry

|    |           |           |           |
|----|-----------|-----------|-----------|
| C  | 1.431446  | 0.317229  | -0.657762 |
| C  | 2.780386  | -1.602336 | 0.403669  |
| C  | 0.053971  | -0.251931 | -0.018805 |
| C  | 2.576198  | -0.095312 | 0.300386  |
| H  | 3.315781  | -1.955214 | -0.485283 |
| H  | 2.400659  | 0.321798  | 1.293946  |
| C  | 1.451696  | -2.295125 | 0.503547  |
| H  | 1.529644  | -3.350784 | 0.760788  |
| C  | 0.239211  | -1.757199 | 0.296725  |
| O  | 3.634936  | -1.969427 | 1.484647  |
| H  | 3.154011  | -1.785606 | 2.308384  |
| Br | 4.340309  | 0.723542  | -0.188593 |
| C  | 1.435783  | 1.858110  | -0.798916 |
| H  | 2.264375  | 2.159399  | -1.443574 |
| H  | 1.581654  | 2.368472  | 0.157645  |
| H  | 0.512884  | 2.241349  | -1.240079 |
| C  | 1.670398  | -0.287488 | -2.062200 |
| H  | 2.700804  | -0.085875 | -2.371220 |
| H  | 1.012097  | 0.168657  | -2.807318 |
| H  | 1.508857  | -1.368863 | -2.086393 |
| C  | -0.954225 | -2.672705 | 0.437301  |
| H  | -0.626746 | -3.665726 | 0.759336  |
| H  | -1.497721 | -2.790238 | -0.504788 |
| H  | -1.686912 | -2.310053 | 1.164592  |
| C  | -0.253963 | 0.491577  | 1.329489  |
| H  | 0.289293  | -0.001435 | 2.141820  |
| H  | 0.126851  | 1.512691  | 1.274656  |
| C  | -1.083587 | 0.015704  | -1.078900 |
| H  | -1.158532 | -0.826988 | -1.769578 |
| H  | -0.763795 | 0.859769  | -1.693068 |
| C  | -1.730176 | 0.588559  | 1.735330  |
| H  | -2.148282 | -0.400364 | 1.961304  |
| H  | -1.810142 | 1.179466  | 2.654595  |
| C  | -2.516468 | 0.414193  | -0.651303 |
| H  | -2.972894 | 0.988754  | -1.455363 |
| C  | -2.634646 | 1.198893  | 0.666638  |
| Cl | -1.992328 | 2.909108  | 0.238152  |
| C  | -4.060322 | 1.425134  | 1.166261  |
| H  | -4.048110 | 2.131476  | 2.000706  |
| H  | -4.493528 | 0.481276  | 1.506617  |
| H  | -4.697745 | 1.830811  | 0.375423  |
| Br | -3.772784 | -1.165999 | -0.607340 |

SCF Energy (PCM/mPW1PW91/6-31+G\*\*) =  
-6264.55771598

Number of imaginary frequencies = 0

## 1k\_C007

## B3LYP/6-31G\* Geometry

|    |           |           |           |
|----|-----------|-----------|-----------|
| C  | 1.422389  | 0.323065  | -0.661355 |
| C  | 2.771896  | -1.597472 | 0.386200  |
| C  | 0.047746  | -0.248870 | -0.015742 |
| C  | 2.553000  | -0.095888 | 0.299962  |
| H  | 3.247841  | -1.943022 | -0.546362 |
| H  | 2.389131  | 0.304262  | 1.300145  |
| C  | 1.449775  | -2.286179 | 0.538046  |
| H  | 1.530185  | -3.330783 | 0.832388  |
| C  | 0.239764  | -1.751704 | 0.315580  |
| O  | 3.588895  | -1.954178 | 1.495317  |
| H  | 4.447093  | -1.518816 | 1.349171  |
| Br | 4.345607  | 0.714107  | -0.173867 |
| C  | 1.431773  | 1.863149  | -0.802631 |
| H  | 2.259858  | 2.161119  | -1.450646 |
| H  | 1.580174  | 2.373388  | 0.153442  |
| H  | 0.509546  | 2.248831  | -1.243094 |
| C  | 1.658027  | -0.284444 | -2.065103 |
| H  | 2.691267  | -0.095612 | -2.373587 |
| H  | 1.006269  | 0.179083  | -2.811302 |
| H  | 1.483507  | -1.363740 | -2.087879 |
| C  | -0.953474 | -2.665697 | 0.470233  |
| H  | -0.624999 | -3.651354 | 0.812899  |
| H  | -1.493725 | -2.802978 | -0.471252 |
| H  | -1.688584 | -2.291078 | 1.188655  |
| C  | -0.259478 | 0.502963  | 1.328353  |
| H  | 0.285420  | 0.015078  | 2.142147  |
| H  | 0.118719  | 1.524793  | 1.266923  |
| C  | -1.089646 | 0.009572  | -1.077560 |
| H  | -1.161787 | -0.836908 | -1.763991 |
| H  | -0.773561 | 0.852571  | -1.695527 |
| C  | -1.735771 | 0.600990  | 1.733492  |
| H  | -2.151492 | -0.386453 | 1.969610  |
| H  | -1.816093 | 1.200025  | 2.647413  |
| C  | -2.523717 | 0.405330  | -0.651745 |
| H  | -2.982649 | 0.972689  | -1.459486 |
| C  | -2.643100 | 1.199125  | 0.660511  |
| Cl | -2.006638 | 2.908798  | 0.216406  |
| C  | -4.069106 | 1.425324  | 1.158904  |
| H  | -4.058534 | 2.138280  | 1.987715  |
| H  | -4.498923 | 0.482873  | 1.507392  |
| H  | -4.708455 | 1.822463  | 0.365260  |
| Br | -3.773863 | -1.178862 | -0.596543 |

SCF Energy (PCM/mPW1PW91/6-31+G\*\*) =  
-6264.55993712

Number of imaginary frequencies = 0

## 1k\_C008

## B3LYP/6-31G\* Geometry

|    |           |           |           |
|----|-----------|-----------|-----------|
| C  | 1.549761  | 0.632829  | 1.219427  |
| C  | 2.263267  | -1.531458 | -0.147437 |
| C  | 0.076442  | 0.053959  | 0.939176  |
| C  | 2.594657  | -0.085594 | 0.310278  |
| H  | 1.897302  | -1.493645 | -1.183246 |
| H  | 3.546625  | -0.125252 | 0.838083  |
| C  | 1.208106  | -2.151439 | 0.716347  |
| H  | 1.327340  | -3.216364 | 0.901362  |
| C  | 0.163135  | -1.471970 | 1.208538  |
| O  | 3.427365  | -2.350582 | -0.103764 |
| H  | 4.022770  | -2.023754 | -0.798456 |
| Br | 3.127865  | 0.921207  | -1.361181 |
| C  | 1.986530  | 0.304047  | 2.676566  |
| H  | 2.968783  | 0.748207  | 2.874099  |
| H  | 2.058499  | -0.769191 | 2.862354  |
| H  | 1.287008  | 0.732733  | 3.401057  |
| C  | 1.662683  | 2.169169  | 1.093118  |
| H  | 2.713736  | 2.465257  | 1.168168  |
| H  | 1.128641  | 2.666410  | 1.907510  |
| H  | 1.290412  | 2.563652  | 0.146344  |
| C  | -0.832411 | -2.204720 | 2.079912  |
| H  | -0.466855 | -3.213722 | 2.294297  |
| H  | -1.803308 | -2.309268 | 1.585219  |
| H  | -0.997746 | -1.703364 | 3.040608  |
| C  | -0.953013 | 0.779651  | 1.852686  |
| H  | -0.829528 | 0.467542  | 2.893845  |
| H  | -0.742945 | 1.851270  | 1.829663  |
| C  | -0.307554 | 0.354326  | -0.549066 |
| H  | 0.259995  | -0.271929 | -1.237737 |
| H  | -0.029150 | 1.386496  | -0.779755 |
| C  | -2.432750 | 0.608428  | 1.472160  |
| H  | -2.760560 | -0.425507 | 1.619131  |
| H  | -3.049000 | 1.228551  | 2.132438  |
| C  | -1.782717 | 0.251339  | -0.938300 |
| H  | -1.923623 | 0.621716  | -1.953410 |
| C  | -2.755166 | 0.959122  | 0.019535  |
| Cl | -2.410422 | 2.785860  | -0.238833 |
| C  | -4.232716 | 0.774517  | -0.317110 |
| H  | -4.844161 | 1.417208  | 0.322148  |
| H  | -4.523781 | -0.266705 | -0.156115 |
| H  | -4.432709 | 1.031452  | -1.361585 |
| Br | -2.321838 | -1.680350 | -1.132268 |

SCF Energy (PCM/mPW1PW91/6-31+G\*\*) =  
-6264.56329332

Number of imaginary frequencies = 0



## 1k\_C009

## B3LYP/6-31G\* Geometry

|    |           |           |           |
|----|-----------|-----------|-----------|
| C  | -1.612642 | -0.596151 | 1.190530  |
| C  | -2.554260 | 1.474958  | -0.133257 |
| C  | -0.155249 | 0.024777  | 0.923427  |
| C  | -2.658433 | -0.033886 | 0.190448  |
| H  | -2.478554 | 1.600602  | -1.221995 |
| H  | -3.654561 | -0.200592 | 0.596723  |
| C  | -1.393451 | 2.153000  | 0.541473  |
| H  | -1.498792 | 3.234773  | 0.632380  |
| C  | -0.304870 | 1.560318  | 1.048581  |
| O  | -3.796026 | 2.043118  | 0.317403  |
| H  | -3.808455 | 2.974544  | 0.045497  |
| Br | -2.800726 | -1.052754 | -1.545425 |
| C  | -2.139376 | -0.167427 | 2.592077  |
| H  | -3.086883 | -0.678074 | 2.797019  |
| H  | -2.315866 | 0.906503  | 2.670087  |
| H  | -1.436736 | -0.461442 | 3.378014  |
| C  | -1.651545 | -2.142163 | 1.188419  |
| H  | -2.693545 | -2.478756 | 1.197196  |
| H  | -1.174964 | -2.546883 | 2.085764  |
| H  | -1.178731 | -2.595487 | 0.316014  |
| C  | 0.695493  | 2.414031  | 1.796404  |
| H  | 0.888431  | 2.031941  | 2.805765  |
| H  | 0.312991  | 3.434137  | 1.900556  |
| H  | 1.652830  | 2.475286  | 1.272213  |
| C  | 0.856564  | -0.571823 | 1.945643  |
| H  | 0.683340  | -0.154961 | 2.942392  |
| H  | 0.673635  | -1.645231 | 2.029354  |
| C  | 0.311235  | -0.369140 | -0.519935 |
| H  | -0.232731 | 0.207751  | -1.268626 |
| H  | 0.048275  | -1.414762 | -0.697857 |
| C  | 2.347116  | -0.401629 | 1.608233  |
| H  | 2.650533  | 0.648515  | 1.669320  |
| H  | 2.945991  | -0.941681 | 2.349989  |
| C  | 1.801998  | -0.289101 | -0.852564 |
| H  | 1.986578  | -0.762982 | -1.815990 |
| C  | 2.738776  | -0.883165 | 0.211508  |
| Cl | 2.426037  | -2.731685 | 0.116422  |
| C  | 4.228247  | -0.708419 | -0.073414 |
| H  | 4.815688  | -1.273389 | 0.655558  |
| H  | 4.497915  | 0.348697  | -0.004522 |
| H  | 4.482019  | -1.064974 | -1.076057 |
| Br | 2.343285  | 1.614614  | -1.246651 |

SCF Energy (PCM/mPW1PW91/6-31+G\*\*) =  
-6264.55924526

Number of imaginary frequencies = 0

## 1k\_C010

## B3LYP/6-31G\* Geometry

|    |           |           |           |
|----|-----------|-----------|-----------|
| C  | 1.630501  | 0.906022  | 0.931254  |
| C  | 2.919405  | -1.292982 | 0.326385  |
| C  | 0.229805  | 0.117105  | 0.845955  |
| C  | 2.748651  | 0.222558  | 0.100036  |
| H  | 3.238680  | -1.755391 | -0.610945 |
| H  | 3.702048  | 0.699236  | 0.323383  |
| C  | 1.682686  | -1.953144 | 0.853990  |
| H  | 1.825634  | -3.007339 | 1.087638  |
| C  | 0.509373  | -1.375479 | 1.159277  |
| O  | 4.016172  | -1.540515 | 1.222502  |
| H  | 3.686093  | -1.418095 | 2.126661  |
| Br | 2.644756  | 0.547746  | -1.892453 |
| C  | 2.136060  | 0.892820  | 2.406578  |
| H  | 3.173332  | 1.240174  | 2.460324  |
| H  | 2.080874  | -0.098669 | 2.864767  |
| H  | 1.537602  | 1.572368  | 3.020217  |
| C  | 1.559331  | 2.397096  | 0.527427  |
| H  | 2.530641  | 2.864068  | 0.730086  |
| H  | 0.810621  | 2.946066  | 1.103958  |
| H  | 1.356269  | 2.545498  | -0.533705 |
| C  | -0.509339 | -2.230700 | 1.886521  |
| H  | -0.100754 | -3.230532 | 2.060892  |
| H  | -1.435933 | -2.348702 | 1.321191  |
| H  | -0.766138 | -1.808148 | 2.865784  |
| C  | -0.753611 | 0.744844  | 1.885449  |
| H  | -0.498505 | 0.405988  | 2.894305  |
| H  | -0.614635 | 1.828128  | 1.887689  |
| C  | -0.374062 | 0.292370  | -0.594552 |
| H  | 0.128149  | -0.371758 | -1.297048 |
| H  | -0.149439 | 1.308131  | -0.926972 |
| C  | -2.254222 | 0.494615  | 1.661572  |
| H  | -2.511616 | -0.556216 | 1.828030  |
| H  | -2.823754 | 1.074065  | 2.396830  |
| C  | -1.885027 | 0.168444  | -0.810761 |
| H  | -2.136487 | 0.566777  | -1.792958 |
| C  | -2.757502 | 0.840376  | 0.261374  |
| Cl | -2.494631 | 2.678414  | -0.021777 |
| C  | -4.259082 | 0.617045  | 0.104290  |
| H  | -4.592161 | 0.874755  | -0.905374 |
| H  | -4.804913 | 1.238238  | 0.819705  |
| H  | -4.499790 | -0.433212 | 0.288397  |
| Br | -2.433164 | -1.758897 | -1.041588 |

SCF Energy (PCM/mPW1PW91/6-31+G\*\*) =  
-6264.55745208

Number of imaginary frequencies = 0

## 1k\_C011

## B3LYP/6-31G\* Geometry

|    |          |          |          |
|----|----------|----------|----------|
| C  | -1.31460 | -0.53879 | -0.44893 |
| C  | -3.16538 | 1.25869  | -0.27685 |
| C  | -0.22467 | 0.63917  | -0.35635 |
| C  | -2.55331 | -0.00935 | 0.31246  |
| H  | -3.88033 | 0.97115  | -1.06247 |
| H  | -2.31318 | 0.17436  | 1.35830  |
| C  | -2.13104 | 2.16408  | -0.89465 |
| H  | -2.53333 | 3.08600  | -1.31647 |
| C  | -0.82195 | 1.90553  | -1.01398 |
| O  | -3.86569 | 1.90538  | 0.79285  |
| H  | -4.47477 | 2.55204  | 0.40514  |
| Br | -4.02321 | -1.36642 | 0.46809  |
| C  | -0.82186 | -1.85346 | 0.19109  |
| H  | -1.60943 | -2.60778 | 0.12299  |
| H  | -0.57169 | -1.75179 | 1.25165  |
| H  | 0.05142  | -2.24639 | -0.33837 |
| C  | -1.67975 | -0.86200 | -1.91794 |
| H  | -2.54969 | -1.52563 | -1.93568 |
| H  | -0.86267 | -1.38453 | -2.42460 |
| H  | -1.92040 | 0.03125  | -2.49953 |
| C  | 0.04551  | 2.88510  | -1.77453 |
| H  | -0.53178 | 3.77728  | -2.03504 |
| H  | 0.41815  | 2.45287  | -2.71247 |
| H  | 0.92475  | 3.21560  | -1.20922 |
| C  | 0.09667  | 1.00103  | 1.14323  |
| H  | -0.66782 | 1.67987  | 1.52980  |
| H  | 0.06384  | 0.10412  | 1.77094  |
| C  | 1.11681  | 0.19826  | -1.03977 |
| H  | 1.58158  | 1.03441  | -1.56675 |
| H  | 0.93198  | -0.56037 | -1.80151 |
| C  | 1.47212  | 1.65417  | 1.31129  |
| H  | 1.53694  | 2.54730  | 0.67960  |
| H  | 1.60745  | 1.99872  | 2.34009  |
| C  | 2.13721  | -0.35401 | -0.03798 |
| H  | 1.70799  | -1.16819 | 0.53706  |
| C  | 2.65683  | 0.72461  | 0.93560  |
| Cl | 3.20940  | -0.16310 | 2.47267  |
| C  | 3.84606  | 1.54664  | 0.44424  |
| H  | 4.07498  | 2.33348  | 1.16905  |
| H  | 3.59793  | 2.02084  | -0.51342 |
| H  | 4.73059  | 0.92564  | 0.30015  |
| Br | 3.59754  | -1.27039 | -1.03636 |

SCF Energy (PCM/mPW1PW91/6-31+G\*\*) =  
-6264.56101940

Number of imaginary frequencies = 0

## 1k\_C012

## B3LYP/6-31G\* Geometry

|    |           |           |           |
|----|-----------|-----------|-----------|
| C  | -1.307398 | -0.518148 | -0.450031 |
| C  | -3.190689 | 1.244490  | -0.305914 |
| C  | -0.223870 | 0.663287  | -0.320248 |
| C  | -2.562241 | -0.011866 | 0.307067  |
| H  | -3.837580 | 0.940437  | -1.137028 |
| H  | -2.322673 | 0.170352  | 1.355086  |
| C  | -2.146569 | 2.189203  | -0.838676 |
| H  | -2.556121 | 3.121618  | -1.225422 |
| C  | -0.829575 | 1.950937  | -0.929524 |
| O  | -4.081624 | 1.899451  | 0.595053  |
| H  | -3.540998 | 2.317639  | 1.284987  |
| Br | -4.006998 | -1.391999 | 0.456104  |
| C  | -0.813897 | -1.848060 | 0.157051  |
| H  | -1.597805 | -2.602825 | 0.060697  |
| H  | -0.572301 | -1.777921 | 1.222256  |
| H  | 0.064290  | -2.222763 | -0.377376 |
| C  | -1.658667 | -0.805683 | -1.930490 |
| H  | -2.543486 | -1.448316 | -1.972400 |
| H  | -0.847499 | -1.339706 | -2.434352 |
| H  | -1.869469 | 0.102211  | -2.500899 |
| C  | 0.039962  | 2.978454  | -1.622608 |
| H  | -0.542337 | 3.878063  | -1.842441 |
| H  | 0.425785  | 2.599923  | -2.578232 |
| H  | 0.910674  | 3.284927  | -1.031719 |
| C  | 0.110942  | 0.970188  | 1.189690  |
| H  | -0.642911 | 1.643853  | 1.606175  |
| H  | 0.071140  | 0.052631  | 1.786026  |
| C  | 1.116948  | 0.256100  | -1.026668 |
| H  | 1.579815  | 1.118012  | -1.512363 |
| H  | 0.929785  | -0.462988 | -1.825082 |
| C  | 1.492087  | 1.607011  | 1.377453  |
| H  | 1.561693  | 2.521378  | 0.778189  |
| H  | 1.632926  | 1.912381  | 2.417884  |
| C  | 2.139909  | -0.346118 | -0.055924 |
| H  | 1.709329  | -1.183427 | 0.483259  |
| C  | 2.668314  | 0.683555  | 0.964466  |
| Cl | 3.206831  | -0.273935 | 2.463899  |
| C  | 3.866145  | 1.515151  | 0.511774  |
| H  | 4.745947  | 0.892921  | 0.345907  |
| H  | 4.098870  | 2.269928  | 1.268753  |
| H  | 3.625908  | 2.029441  | -0.426911 |
| Br | 3.591155  | -1.223072 | -1.100567 |

SCF Energy (PCM/mPW1PW91/6-31+G\*\*) =  
-6264.56165703

Number of imaginary frequencies = 0

| <b>1k_C013</b>               |           |           |           |
|------------------------------|-----------|-----------|-----------|
| <b>B3LYP/6-31G* Geometry</b> |           |           |           |
| C                            | -1.465474 | -0.647838 | -1.031507 |
| C                            | -3.570220 | -0.264789 | 0.472195  |
| C                            | -0.561481 | -1.014865 | 0.243924  |
| C                            | -2.691781 | 0.238043  | -0.671898 |
| H                            | -4.117859 | 0.586686  | 0.896105  |
| H                            | -3.311786 | 0.351192  | -1.560943 |
| C                            | -2.760644 | -0.921183 | 1.544823  |
| H                            | -3.305333 | -1.130629 | 2.466641  |
| C                            | -1.472277 | -1.285366 | 1.470576  |
| O                            | -4.527357 | -1.169995 | -0.113576 |
| H                            | -4.846840 | -1.754556 | 0.591951  |
| Br                           | -2.248364 | 2.159489  | -0.257607 |
| C                            | -2.069002 | -1.946398 | -1.644221 |
| H                            | -2.843604 | -1.695368 | -2.374854 |
| H                            | -2.530868 | -2.589479 | -0.893725 |
| H                            | -1.295377 | -2.511985 | -2.172447 |
| C                            | -0.730048 | 0.066626  | -2.189398 |
| H                            | -1.440242 | 0.224425  | -3.010200 |
| H                            | 0.090486  | -0.529086 | -2.592323 |
| H                            | -0.354289 | 1.050867  | -1.906464 |
| C                            | -0.884139 | -1.983211 | 2.685364  |
| H                            | -1.539094 | -1.851365 | 3.551178  |
| H                            | 0.103792  | -1.600644 | 2.964341  |
| H                            | -0.773396 | -3.062427 | 2.522160  |
| C                            | 0.316567  | -2.292378 | 0.017932  |
| H                            | 0.643911  | -2.652573 | 0.995294  |
| H                            | -0.278241 | -3.106847 | -0.402323 |
| C                            | 0.424447  | 0.130701  | 0.686188  |
| H                            | 0.711346  | -0.042052 | 1.727406  |
| H                            | -0.090319 | 1.090204  | 0.675963  |
| C                            | 1.587052  | -2.105887 | -0.827303 |
| H                            | 2.131659  | -3.056173 | -0.870344 |
| H                            | 1.348550  | -1.844147 | -1.860262 |
| C                            | 1.724047  | 0.268496  | -0.125863 |
| H                            | 1.538244  | 0.651820  | -1.124075 |
| C                            | 2.528092  | -1.034136 | -0.238432 |
| Cl                           | 3.880201  | -0.780978 | -1.478912 |
| C                            | 3.201549  | -1.487848 | 1.056865  |
| H                            | 3.729865  | -2.431348 | 0.894140  |
| H                            | 2.459327  | -1.640516 | 1.847766  |
| H                            | 3.912776  | -0.736835 | 1.403711  |
| Br                           | 2.787010  | 1.743300  | 0.702919  |

**SCF Energy (PCM/mPW1PW91/6-31+G\*\*) =  
-6264.55789874**

**Number of imaginary frequencies = 0**

| <b>1k_C014</b>               |           |           |           |
|------------------------------|-----------|-----------|-----------|
| <b>B3LYP/6-31G* Geometry</b> |           |           |           |
| C                            | 1.468802  | -0.531694 | 1.102930  |
| C                            | 3.489984  | -0.434327 | -0.542519 |
| C                            | 0.499686  | -1.054897 | -0.054753 |
| C                            | 2.697466  | 0.254410  | 0.572313  |
| H                            | 3.969039  | 0.334178  | -1.162899 |
| H                            | 3.378235  | 0.443964  | 1.401323  |
| C                            | 2.631891  | -1.305418 | -1.407186 |
| H                            | 3.144043  | -1.726998 | -2.273880 |
| C                            | 1.343196  | -1.622369 | -1.215342 |
| O                            | 4.521475  | -1.196188 | 0.116844  |
| H                            | 4.891825  | -1.812190 | -0.535514 |
| Br                           | 2.309952  | 2.136497  | -0.033228 |
| C                            | 2.080079  | -1.751802 | 1.858461  |
| H                            | 2.835675  | -1.410661 | 2.573064  |
| H                            | 2.567338  | -2.458852 | 1.185691  |
| H                            | 1.309916  | -2.278066 | 2.428607  |
| C                            | 0.762290  | 0.335158  | 2.167567  |
| H                            | 1.487669  | 0.614445  | 2.940752  |
| H                            | -0.041850 | -0.211281 | 2.670358  |
| H                            | 0.360180  | 1.264542  | 1.758909  |
| C                            | 0.693693  | -2.545396 | -2.226799 |
| H                            | 1.418015  | -2.841007 | -2.991226 |
| H                            | -0.148059 | -2.071040 | -2.746517 |
| H                            | 0.309825  | -3.462519 | -1.765080 |
| C                            | -0.454626 | -2.154468 | 0.533887  |
| H                            | 0.036406  | -3.132533 | 0.520285  |
| H                            | -0.651980 | -1.936429 | 1.587935  |
| C                            | -0.417618 | 0.070209  | -0.671372 |
| H                            | -0.644610 | -0.172948 | -1.715327 |
| H                            | 0.114805  | 1.018328  | -0.697052 |
| C                            | -1.813873 | -2.257307 | -0.169779 |
| H                            | -1.679792 | -2.473960 | -1.233114 |
| H                            | -2.385247 | -3.093841 | 0.242929  |
| C                            | -1.738465 | 0.240825  | 0.085278  |
| H                            | -1.553735 | 0.407910  | 1.140235  |
| C                            | -2.677616 | -0.974532 | -0.074024 |
| Cl                           | -3.698811 | -1.076562 | 1.480494  |
| C                            | -3.656289 | -0.912629 | -1.244066 |
| H                            | -4.199352 | -1.859265 | -1.323111 |
| H                            | -3.103766 | -0.749874 | -2.177592 |
| H                            | -4.371701 | -0.098712 | -1.125522 |
| Br                           | -2.589566 | 1.961883  | -0.455171 |

**SCF Energy (PCM/mPW1PW91/6-31+G\*\*) =  
-6264.55594840**

**Number of imaginary frequencies = 0**

## 1k\_C015

## B3LYP/6-31G\* Geometry

|    |           |           |           |
|----|-----------|-----------|-----------|
| C  | -1.460087 | -0.653729 | -1.030392 |
| C  | -3.571914 | -0.286484 | 0.472265  |
| C  | -0.557586 | -1.012890 | 0.247950  |
| C  | -2.688638 | 0.226643  | -0.672097 |
| H  | -4.118251 | 0.564821  | 0.898533  |
| H  | -3.295079 | 0.347718  | -1.571092 |
| C  | -2.762786 | -0.937577 | 1.543823  |
| H  | -3.322134 | -1.174949 | 2.446466  |
| C  | -1.469790 | -1.281696 | 1.473612  |
| O  | -4.519792 | -1.258722 | 0.000821  |
| H  | -5.231123 | -0.778171 | -0.452993 |
| Br | -2.255500 | 2.155732  | -0.253418 |
| C  | -2.064808 | -1.954459 | -1.638188 |
| H  | -2.827738 | -1.703455 | -2.382275 |
| H  | -2.539585 | -2.589046 | -0.888521 |
| H  | -1.289757 | -2.527345 | -2.156020 |
| C  | -0.725528 | 0.059684  | -2.189128 |
| H  | -1.434323 | 0.214291  | -3.012048 |
| H  | 0.097139  | -0.534757 | -2.589560 |
| H  | -0.352216 | 1.045295  | -1.907402 |
| C  | -0.879082 | -1.971328 | 2.692252  |
| H  | -1.536811 | -1.838118 | 3.555507  |
| H  | 0.106824  | -1.583119 | 2.971453  |
| H  | -0.764799 | -3.051017 | 2.535201  |
| C  | 0.321311  | -2.290763 | 0.027895  |
| H  | 0.648736  | -2.644921 | 1.007268  |
| H  | -0.273400 | -3.108273 | -0.386531 |
| C  | 0.427761  | 0.135535  | 0.682762  |
| H  | 0.713839  | -0.032387 | 1.724902  |
| H  | -0.086307 | 1.095326  | 0.668473  |
| C  | 1.591690  | -2.108351 | -0.818450 |
| H  | 2.136849  | -3.058523 | -0.856597 |
| H  | 1.353564  | -1.852000 | -1.852963 |
| C  | 1.727833  | 0.269746  | -0.129181 |
| H  | 1.543186  | 0.648014  | -1.129557 |
| C  | 2.532168  | -1.033278 | -0.234744 |
| Cl | 3.884892  | -0.785778 | -1.476537 |
| C  | 3.205337  | -1.480144 | 1.063057  |
| H  | 3.733366  | -2.424688 | 0.905493  |
| H  | 2.462764  | -1.628223 | 1.854419  |
| H  | 3.916686  | -0.727487 | 1.406001  |
| Br | 2.790314  | 1.749513  | 0.692212  |

SCF Energy (PCM/mPW1PW91/6-31+G\*\*) =  
-6264.55902661

Number of imaginary frequencies = 0

## 1k\_C016

## B3LYP/6-31G\* Geometry

|    |           |           |           |
|----|-----------|-----------|-----------|
| C  | 1.463896  | -0.537384 | 1.104339  |
| C  | 3.490470  | -0.452650 | -0.542071 |
| C  | 0.496255  | -1.055948 | -0.056290 |
| C  | 2.693359  | 0.244813  | 0.574247  |
| H  | 3.961138  | 0.316855  | -1.167672 |
| H  | 3.361467  | 0.443737  | 1.412966  |
| C  | 2.633371  | -1.322743 | -1.402545 |
| H  | 3.161925  | -1.765875 | -2.244197 |
| C  | 1.341029  | -1.624249 | -1.215256 |
| O  | 4.515362  | -1.295208 | 0.010689  |
| H  | 5.239071  | -0.720200 | 0.308013  |
| Br | 2.313377  | 2.133811  | -0.036123 |
| C  | 2.077231  | -1.759155 | 1.856400  |
| H  | 2.819617  | -1.416542 | 2.585041  |
| H  | 2.577709  | -2.457902 | 1.184500  |
| H  | 1.305279  | -2.295221 | 2.414665  |
| C  | 0.757902  | 0.328420  | 2.169934  |
| H  | 1.482309  | 0.605804  | 2.944969  |
| H  | -0.047531 | -0.217709 | 2.670925  |
| H  | 0.357148  | 1.258864  | 1.762174  |
| C  | 0.689785  | -2.543539 | -2.229281 |
| H  | 0.299201  | -3.459046 | -1.770034 |
| H  | 1.416841  | -2.842800 | -2.989290 |
| H  | -0.146959 | -2.064349 | -2.753182 |
| C  | -0.459723 | -2.155497 | 0.529932  |
| H  | 0.030276  | -3.133932 | 0.513042  |
| H  | -0.657671 | -1.940398 | 1.584623  |
| C  | -0.419479 | 0.071854  | -0.669620 |
| H  | -0.645888 | -0.169660 | -1.713988 |
| H  | 0.113055  | 1.019880  | -0.694062 |
| C  | -1.818588 | -2.254693 | -0.174910 |
| H  | -1.683259 | -2.468003 | -1.238697 |
| H  | -2.391240 | -3.091973 | 0.234535  |
| C  | -1.740720 | 0.242468  | 0.086416  |
| H  | -1.557104 | 0.407031  | 1.141944  |
| C  | -2.681066 | -0.971482 | -0.076238 |
| Cl | -3.702847 | -1.075957 | 1.478299  |
| C  | -3.659585 | -0.905642 | -1.246125 |
| H  | -4.374086 | -0.091176 | -1.125778 |
| H  | -4.203662 | -1.851494 | -1.327462 |
| H  | -3.106617 | -0.741486 | -2.179111 |
| Br | -2.589672 | 1.966220  | -0.450280 |

SCF Energy (PCM/mPW1PW91/6-31+G\*\*) =  
-6264.55703213

Number of imaginary frequencies = 0

## 1k\_C017

## B3LYP/6-31G\* Geometry

|    |           |           |           |
|----|-----------|-----------|-----------|
| C  | 1.466183  | -0.533297 | 1.101265  |
| C  | 3.501931  | -0.427364 | -0.533912 |
| C  | 0.503586  | -1.047866 | -0.065402 |
| C  | 2.696079  | 0.258096  | 0.581457  |
| H  | 3.993348  | 0.346166  | -1.129823 |
| H  | 3.370573  | 0.454537  | 1.414043  |
| C  | 2.646964  | -1.282685 | -1.415020 |
| H  | 3.173481  | -1.705412 | -2.269539 |
| C  | 1.356141  | -1.601496 | -1.227961 |
| O  | 4.593807  | -1.183151 | 0.013731  |
| H  | 4.248838  | -2.049175 | 0.279733  |
| Br | 2.297085  | 2.142054  | -0.022264 |
| C  | 2.067106  | -1.767142 | 1.846651  |
| H  | 2.902696  | -1.463229 | 2.485360  |
| H  | 2.421931  | -2.541215 | 1.159602  |
| H  | 1.318561  | -2.229551 | 2.495656  |
| C  | 0.759120  | 0.319197  | 2.176715  |
| H  | 1.479894  | 0.574338  | 2.962716  |
| H  | -0.058148 | -0.225630 | 2.659394  |
| H  | 0.375224  | 1.260943  | 1.779631  |
| C  | 0.711592  | -2.517942 | -2.249041 |
| H  | 1.440439  | -2.807332 | -3.011208 |
| H  | -0.126560 | -2.038310 | -2.769912 |
| H  | 0.323366  | -3.438516 | -1.797709 |
| C  | -0.446760 | -2.157694 | 0.511630  |
| H  | 0.045810  | -3.134917 | 0.485185  |
| H  | -0.644928 | -1.953336 | 1.568413  |
| C  | -0.417206 | 0.077974  | -0.673267 |
| H  | -0.643862 | -0.160751 | -1.718149 |
| H  | 0.112356  | 1.027627  | -0.694421 |
| C  | -1.805716 | -2.255774 | -0.192735 |
| H  | -1.670546 | -2.455932 | -1.259242 |
| H  | -2.373977 | -3.100386 | 0.207626  |
| C  | -1.738260 | 0.241174  | 0.084999  |
| H  | -1.553446 | 0.406553  | 1.140199  |
| C  | -2.673481 | -0.977755 | -0.077161 |
| Cl | -3.678890 | -1.099882 | 1.486188  |
| C  | -3.663203 | -0.910305 | -1.237477 |
| H  | -4.201834 | -1.859121 | -1.320465 |
| H  | -3.120178 | -0.735519 | -2.174342 |
| H  | -4.381887 | -0.101518 | -1.104627 |
| Br | -2.594940 | 1.960523  | -0.450525 |

SCF Energy (PCM/mPW1PW91/6-31+G\*\*) =  
-6264.55737798

Number of imaginary frequencies = 0

## 1k\_C018

## B3LYP/6-31G\* Geometry

|    |           |           |           |
|----|-----------|-----------|-----------|
| C  | -1.460107 | -0.653643 | -1.030312 |
| C  | -3.571916 | -0.286569 | 0.472267  |
| C  | -0.557600 | -1.012885 | 0.247965  |
| C  | -2.688605 | 0.226715  | -0.672024 |
| H  | -4.117959 | 0.564808  | 0.898766  |
| H  | -3.295142 | 0.347923  | -1.570927 |
| C  | -2.762872 | -0.938023 | 1.543659  |
| H  | -3.322307 | -1.175703 | 2.446161  |
| C  | -1.469788 | -1.281933 | 1.473523  |
| O  | -4.519983 | -1.258390 | 0.000554  |
| H  | -5.231474 | -0.777642 | -0.452782 |
| Br | -2.255353 | 2.155827  | -0.253303 |
| C  | -2.064900 | -1.954300 | -1.638218 |
| H  | -2.827593 | -1.703273 | -2.382547 |
| H  | -2.539962 | -2.588833 | -0.888664 |
| H  | -1.289861 | -2.527407 | -2.155850 |
| C  | -0.725568 | 0.059753  | -2.189063 |
| H  | -1.434284 | 0.214114  | -3.012089 |
| H  | 0.097195  | -0.534675 | -2.589350 |
| H  | -0.352402 | 1.045452  | -1.907435 |
| C  | -0.879017 | -1.971370 | 2.692251  |
| H  | -0.764686 | -3.051082 | 2.535373  |
| H  | -1.536657 | -1.838024 | 3.555544  |
| H  | 0.106857  | -1.582967 | 2.971301  |
| C  | 0.321282  | -2.290788 | 0.027756  |
| H  | 0.648687  | -2.645087 | 1.007090  |
| H  | -0.273562 | -3.108195 | -0.386669 |
| C  | 0.427826  | 0.135407  | 0.682905  |
| H  | 0.714040  | -0.032787 | 1.724982  |
| H  | -0.086293 | 1.095173  | 0.668955  |
| C  | 1.591594  | -2.108267 | -0.818624 |
| H  | 2.136710  | -3.058463 | -0.856879 |
| H  | 1.353501  | -1.851747 | -1.853112 |
| C  | 1.727753  | 0.269649  | -0.129153 |
| H  | 1.543100  | 0.647979  | -1.129503 |
| C  | 2.532138  | -1.033274 | -0.234810 |
| Cl | 3.884862  | -0.785653 | -1.476529 |
| C  | 3.205236  | -1.480276 | 1.062938  |
| H  | 3.733720  | -2.424512 | 0.905147  |
| H  | 2.462613  | -1.629048 | 1.854140  |
| H  | 3.916226  | -0.727406 | 1.406253  |
| Br | 2.790325  | 1.749415  | 0.692226  |

SCF Energy (PCM/mPW1PW91/6-31+G\*\*) =  
-6264.55902974

Number of imaginary frequencies = 0

## 1k\_C019

## B3LYP/6-31G\* Geometry

|    |           |           |           |
|----|-----------|-----------|-----------|
| C  | 1.516629  | 0.375965  | -0.643450 |
| C  | 2.923797  | -1.493143 | 0.425241  |
| C  | 0.172022  | -0.196122 | 0.046508  |
| C  | 2.683510  | 0.004106  | 0.298296  |
| H  | 3.351383  | -1.870146 | -0.518003 |
| H  | 2.549681  | 0.424530  | 1.294514  |
| C  | 1.616647  | -2.179163 | 0.686245  |
| H  | 1.716915  | -3.198119 | 1.054627  |
| C  | 0.397501  | -1.656959 | 0.493637  |
| O  | 3.801134  | -1.800934 | 1.501260  |
| H  | 4.647165  | -1.366582 | 1.294671  |
| Br | 4.446931  | 0.823990  | -0.254006 |
| C  | 1.472353  | 1.908845  | -0.822488 |
| H  | 2.358407  | 2.240936  | -1.368535 |
| H  | 1.466164  | 2.443002  | 0.132874  |
| H  | 0.598877  | 2.229013  | -1.398604 |
| C  | 1.744938  | -0.266962 | -2.033445 |
| H  | 2.768857  | -0.065715 | -2.363518 |
| H  | 1.072989  | 0.155225  | -2.785632 |
| H  | 1.594600  | -1.350078 | -2.018296 |
| C  | -0.802868 | -2.521404 | 0.801854  |
| H  | -0.479779 | -3.504308 | 1.156493  |
| H  | -1.449685 | -2.670623 | -0.067085 |
| H  | -1.437393 | -2.085085 | 1.582267  |
| C  | -0.205140 | 0.638166  | 1.321113  |
| H  | -0.549011 | -0.039761 | 2.108058  |
| H  | 0.685841  | 1.117840  | 1.735756  |
| C  | -0.977320 | -0.076333 | -1.020322 |
| H  | -1.012535 | -0.975004 | -1.638651 |
| H  | -0.691055 | 0.726353  | -1.703510 |
| C  | -1.275103 | 1.716508  | 1.092921  |
| H  | -1.415575 | 2.299139  | 2.009668  |
| H  | -0.957030 | 2.421304  | 0.319766  |
| C  | -2.436607 | 0.305374  | -0.629437 |
| H  | -2.816895 | 0.919953  | -1.439614 |
| C  | -2.625705 | 1.099947  | 0.695508  |
| Cl | -3.768515 | 2.525030  | 0.317761  |
| C  | -3.280188 | 0.356753  | 1.860720  |
| H  | -3.330895 | 1.018320  | 2.730107  |
| H  | -2.705992 | -0.533158 | 2.132051  |
| H  | -4.288433 | 0.034048  | 1.600609  |
| Br | -3.691723 | -1.252063 | -0.794550 |

SCF Energy (PCM/mPW1PW91/6-31+G\*\*) =  
-6264.55444964

Number of imaginary frequencies = 0

## 1k\_C020

## B3LYP/6-31G\* Geometry

|    |           |           |           |
|----|-----------|-----------|-----------|
| C  | 1.329475  | -0.390291 | 0.553440  |
| C  | 2.846274  | 1.602235  | -0.034942 |
| C  | -0.001046 | 0.442432  | 0.164550  |
| C  | 2.476099  | 0.158833  | -0.323749 |
| H  | 3.373034  | 1.651045  | 0.932316  |
| H  | 2.255047  | 0.051275  | -1.385172 |
| C  | 1.596308  | 2.420175  | 0.053232  |
| H  | 1.773167  | 3.493481  | 0.025981  |
| C  | 0.344598  | 1.959174  | 0.193764  |
| O  | 3.670981  | 2.157555  | -1.052547 |
| H  | 4.483787  | 1.622299  | -1.062645 |
| Br | 4.189599  | -0.905899 | -0.162318 |
| C  | 1.198873  | -1.904502 | 0.300004  |
| H  | 2.047889  | -2.423824 | 0.751670  |
| H  | 1.214008  | -2.146881 | -0.767294 |
| H  | 0.288584  | -2.319618 | 0.734235  |
| C  | 1.670409  | -0.188603 | 2.051509  |
| H  | 2.690581  | -0.537045 | 2.241219  |
| H  | 1.005575  | -0.774549 | 2.692677  |
| H  | 1.600468  | 0.858243  | 2.359940  |
| C  | -0.750136 | 2.998519  | 0.307064  |
| H  | -0.306699 | 3.997658  | 0.342272  |
| H  | -1.363821 | 2.874982  | 1.204942  |
| H  | -1.441546 | 2.970028  | -0.539943 |
| C  | -0.536264 | 0.139903  | -1.275774 |
| H  | -1.161953 | 0.987535  | -1.570990 |
| H  | 0.291547  | 0.126966  | -1.991664 |
| C  | -1.148033 | 0.074744  | 1.182648  |
| H  | -1.270290 | 0.854105  | 1.938059  |
| H  | -0.851812 | -0.821048 | 1.735450  |
| C  | -1.372524 | -1.142417 | -1.488684 |
| H  | -1.809587 | -1.079588 | -2.492186 |
| H  | -0.736593 | -2.026253 | -1.497512 |
| C  | -2.538319 | -0.297903 | 0.639199  |
| H  | -3.155369 | -0.648753 | 1.464324  |
| C  | -2.532109 | -1.359368 | -0.480544 |
| Cl | -2.252168 | -2.971197 | 0.460519  |
| C  | -3.872610 | -1.572427 | -1.183000 |
| H  | -3.808479 | -2.454349 | -1.826521 |
| H  | -4.109068 | -0.702700 | -1.800767 |
| H  | -4.684540 | -1.720159 | -0.465482 |
| Br | -3.608767 | 1.299442  | 0.037071  |

SCF Energy (PCM/mPW1PW91/6-31+G\*\*) =  
-6264.55457809

Number of imaginary frequencies = 0

## 1I\_C001

## B3LYP/6-31G\* Geometry

|    |           |           |           |
|----|-----------|-----------|-----------|
| C  | -1.313417 | -0.261700 | -0.352736 |
| C  | -3.249101 | 1.286982  | 0.484711  |
| C  | -0.233403 | 0.651341  | 0.426345  |
| C  | -2.645147 | -0.119149 | 0.425102  |
| H  | -3.978473 | 1.293243  | 1.311803  |
| H  | -2.523680 | -0.489271 | 1.443656  |
| C  | -2.165225 | 2.276351  | 0.782867  |
| H  | -2.522895 | 3.274511  | 1.027898  |
| C  | -0.847463 | 2.045018  | 0.731431  |
| O  | -3.892186 | 1.714701  | -0.709829 |
| H  | -4.583715 | 1.056082  | -0.901932 |
| Br | -4.101644 | -1.340057 | -0.257211 |
| C  | -0.940503 | -1.760659 | -0.385047 |
| H  | -1.658852 | -2.297889 | -1.008463 |
| H  | -0.969618 | -2.223500 | 0.606223  |
| H  | 0.047085  | -1.929627 | -0.817097 |
| C  | -1.484503 | 0.203488  | -1.817519 |
| H  | -2.376318 | -0.265558 | -2.242170 |
| H  | -0.631016 | -0.109551 | -2.427335 |
| H  | -1.609654 | 1.284213  | -1.905657 |
| C  | 0.073780  | 3.208695  | 1.051502  |
| H  | -0.496342 | 4.027347  | 1.499206  |
| H  | 0.561608  | 3.606673  | 0.153368  |
| H  | 0.870774  | 2.942371  | 1.756439  |
| C  | 0.199989  | 0.060983  | 1.815089  |
| H  | 0.533184  | 0.893099  | 2.444548  |
| H  | -0.668758 | -0.355676 | 2.335969  |
| C  | 1.066264  | 0.880697  | -0.424224 |
| H  | 1.563192  | 1.780222  | -0.061461 |
| H  | 0.812350  | 1.091239  | -1.463714 |
| C  | 1.315820  | -1.004158 | 1.809920  |
| H  | 1.606649  | -1.217765 | 2.844911  |
| H  | 0.955195  | -1.944259 | 1.391019  |
| C  | 2.129433  | -0.225808 | -0.395353 |
| H  | 1.811868  | -1.129856 | -0.907640 |
| C  | 2.576445  | -0.578013 | 1.029963  |
| Cl | 3.670560  | -2.068183 | 0.947076  |
| C  | 3.373007  | 0.514323  | 1.743263  |
| H  | 4.273437  | 0.767589  | 1.180978  |
| H  | 3.660453  | 0.172681  | 2.741241  |
| H  | 2.772281  | 1.423566  | 1.853524  |
| Br | 3.648883  | 0.389236  | -1.537899 |

SCF Energy (PCM/mPW1PW91/6-31+G\*\*) =  
-6264.56285906

Number of imaginary frequencies = 0

## 1I\_C002

## B3LYP/6-31G\* Geometry

|    |           |           |           |
|----|-----------|-----------|-----------|
| C  | 1.449065  | 0.273315  | -0.573082 |
| C  | 2.758537  | -1.487049 | 0.832555  |
| C  | 0.053604  | -0.232579 | 0.085552  |
| C  | 2.539890  | -0.011806 | 0.479518  |
| H  | 3.260736  | -1.519213 | 1.814392  |
| H  | 2.324831  | 0.543421  | 1.392771  |
| C  | 1.432847  | -2.181046 | 0.930895  |
| H  | 1.499869  | -3.205949 | 1.290482  |
| C  | 0.237102  | -1.692445 | 0.570254  |
| O  | 3.532541  | -2.219716 | -0.111229 |
| H  | 4.377192  | -1.743733 | -0.205847 |
| Br | 4.341080  | 0.752987  | -0.020898 |
| C  | 1.450108  | 1.789590  | -0.883561 |
| H  | 2.313522  | 2.027033  | -1.509607 |
| H  | 1.531935  | 2.408275  | 0.015182  |
| H  | 0.554679  | 2.108520  | -1.421754 |
| C  | 1.736016  | -0.480296 | -1.893018 |
| H  | 2.759274  | -0.266743 | -2.215054 |
| H  | 1.064886  | -0.142739 | -2.688991 |
| H  | 1.645045  | -1.562110 | -1.786479 |
| C  | -0.951033 | -2.614533 | 0.713370  |
| H  | -0.631964 | -3.570692 | 1.138552  |
| H  | -1.429246 | -2.820872 | -0.248642 |
| H  | -1.734969 | -2.207194 | 1.358978  |
| C  | -0.302562 | 0.649099  | 1.335520  |
| H  | 0.217617  | 0.252607  | 2.213118  |
| H  | 0.067626  | 1.664953  | 1.185652  |
| C  | -1.048518 | -0.086133 | -1.032202 |
| H  | -1.089221 | -0.991369 | -1.641615 |
| H  | -0.714959 | 0.699980  | -1.712012 |
| C  | -1.792287 | 0.766668  | 1.680233  |
| H  | -2.207082 | -0.200906 | 1.989829  |
| H  | -1.910245 | 1.445036  | 2.532639  |
| C  | -2.499143 | 0.336233  | -0.697251 |
| H  | -2.930596 | 0.818938  | -1.572205 |
| C  | -2.665980 | 1.253527  | 0.525837  |
| Cl | -2.020081 | 2.915027  | -0.062692 |
| C  | -4.107344 | 1.519522  | 0.955993  |
| H  | -4.725213 | 1.825806  | 0.107101  |
| H  | -4.123693 | 2.315771  | 1.705140  |
| H  | -4.542718 | 0.616427  | 1.390994  |
| Br | -3.747882 | -1.241712 | -0.532265 |

SCF Energy (PCM/mPW1PW91/6-31+G\*\*) =  
-6264.55668059

Number of imaginary frequencies = 0

## 1I\_C003

## B3LYP/6-31G\* Geometry

|    |           |           |           |
|----|-----------|-----------|-----------|
| C  | -1.335228 | -0.842216 | -1.090093 |
| C  | -3.570692 | -0.766822 | 0.191068  |
| C  | -0.482048 | -1.038669 | 0.261144  |
| C  | -2.679912 | -0.102928 | -0.856917 |
| H  | -3.948419 | -1.693055 | -0.265389 |
| H  | -3.212107 | -0.008751 | -1.804080 |
| C  | -2.767357 | -1.109381 | 1.410247  |
| H  | -3.365336 | -1.286801 | 2.302675  |
| C  | -1.436272 | -1.257386 | 1.467707  |
| O  | -4.751063 | -0.043214 | 0.487990  |
| H  | -4.470045 | 0.842273  | 0.780720  |
| Br | -2.478564 | 1.842954  | -0.349136 |
| C  | -1.753422 | -2.225979 | -1.669032 |
| H  | -2.498276 | -2.097849 | -2.462853 |
| H  | -2.177122 | -2.890415 | -0.910639 |
| H  | -0.893677 | -2.730698 | -2.118988 |
| C  | -0.609749 | -0.096645 | -2.233509 |
| H  | -1.275757 | -0.051344 | -3.103796 |
| H  | 0.297902  | -0.609713 | -2.556597 |
| H  | -0.362555 | 0.933487  | -1.970344 |
| C  | -0.849357 | -1.693297 | 2.801080  |
| H  | -0.615528 | -2.765388 | 2.813723  |
| H  | -1.569888 | -1.512397 | 3.603623  |
| H  | 0.072330  | -1.164589 | 3.066937  |
| C  | 0.470050  | -2.279766 | 0.200782  |
| H  | 0.780171  | -2.510264 | 1.222582  |
| H  | -0.065387 | -3.168636 | -0.141781 |
| C  | 0.426714  | 0.196705  | 0.618057  |
| H  | 0.676021  | 0.144557  | 1.680780  |
| H  | -0.132311 | 1.122686  | 0.493949  |
| C  | 1.753195  | -2.108586 | -0.627819 |
| H  | 2.345828  | -3.028857 | -0.572343 |
| H  | 1.528566  | -1.952238 | -1.685919 |
| C  | 1.754349  | 0.325277  | -0.149958 |
| H  | 1.598480  | 0.611898  | -1.184712 |
| C  | 2.622266  | -0.940404 | -0.116109 |
| Cl | 3.999770  | -0.733266 | -1.337516 |
| C  | 3.273658  | -1.239224 | 1.234236  |
| H  | 3.942331  | -0.428210 | 1.526372  |
| H  | 3.845906  | -2.169288 | 1.176498  |
| H  | 2.514417  | -1.348673 | 2.016091  |
| Br | 2.709984  | 1.918458  | 0.585765  |

SCF Energy (PCM/mPW1PW91/6-31+G\*\*) =  
-6264.56480242

Number of imaginary frequencies = 0

## 1I\_C004

## B3LYP/6-31G\* Geometry

|    |           |           |           |
|----|-----------|-----------|-----------|
| C  | -1.320494 | -0.255374 | -0.358695 |
| C  | -3.254408 | 1.286930  | 0.467870  |
| C  | -0.239183 | 0.643796  | 0.432020  |
| C  | -2.667412 | -0.116840 | 0.404677  |
| H  | -4.021146 | 1.292919  | 1.258525  |
| H  | -2.537183 | -0.463168 | 1.430301  |
| C  | -2.167491 | 2.261949  | 0.817052  |
| H  | -2.514797 | 3.253224  | 1.112321  |
| C  | -0.848570 | 2.033124  | 0.762678  |
| O  | -3.871704 | 1.625354  | -0.778392 |
| H  | -4.164186 | 2.548106  | -0.713938 |
| Br | -4.095699 | -1.353488 | -0.257872 |
| C  | -0.951498 | -1.755211 | -0.395064 |
| H  | -1.664209 | -2.285924 | -1.029487 |
| H  | -0.995463 | -2.224558 | 0.592652  |
| H  | 0.041515  | -1.922560 | -0.815511 |
| C  | -1.472708 | 0.213923  | -1.824370 |
| H  | -2.382213 | -0.219518 | -2.248069 |
| H  | -0.627882 | -0.127338 | -2.431722 |
| H  | -1.558399 | 1.298667  | -1.913731 |
| C  | 0.073803  | 3.186876  | 1.113227  |
| H  | -0.493758 | 3.995315  | 1.582926  |
| H  | 0.562613  | 3.606429  | 0.225391  |
| H  | 0.870787  | 2.900809  | 1.809890  |
| C  | 0.190848  | 0.031854  | 1.813189  |
| H  | 0.520008  | 0.852282  | 2.459937  |
| H  | -0.679832 | -0.396176 | 2.321384  |
| C  | 1.061246  | 0.885684  | -0.414067 |
| H  | 1.558484  | 1.781014  | -0.040986 |
| H  | 0.807131  | 1.107091  | -1.451242 |
| C  | 1.308535  | -1.031351 | 1.793983  |
| H  | 1.597907  | -1.259544 | 2.826293  |
| H  | 0.949621  | -1.965365 | 1.360698  |
| C  | 2.124642  | -0.220772 | -0.398386 |
| H  | 1.807478  | -1.117599 | -0.923485 |
| C  | 2.569939  | -0.591957 | 1.022526  |
| Cl | 3.667703  | -2.078096 | 0.921074  |
| C  | 3.362682  | 0.492124  | 1.752322  |
| H  | 4.262206  | 0.757250  | 1.193975  |
| H  | 3.651191  | 0.136481  | 2.745069  |
| H  | 2.758307  | 1.397174  | 1.876279  |
| Br | 3.645839  | 0.410381  | -1.530482 |

SCF Energy (PCM/mPW1PW91/6-31+G\*\*) =  
-6264.55867049

Number of imaginary frequencies = 0



## 1I\_C005

## B3LYP/6-31G\* Geometry

|    |           |           |           |
|----|-----------|-----------|-----------|
| C  | -1.336558 | -0.378605 | -0.423553 |
| C  | -3.167122 | 1.360799  | 0.223403  |
| C  | -0.217863 | 0.725287  | -0.075647 |
| C  | -2.531899 | -0.020055 | 0.485556  |
| H  | -3.677608 | 1.667044  | 1.152262  |
| H  | -2.235433 | -0.083323 | 1.531722  |
| C  | -2.112756 | 2.372944  | -0.134300 |
| H  | -2.509322 | 3.371606  | -0.306303 |
| C  | -0.814438 | 2.126117  | -0.354000 |
| O  | -4.097793 | 1.390335  | -0.853291 |
| H  | -4.761050 | 0.700926  | -0.670275 |
| Br | -4.014058 | -1.386666 | 0.438043  |
| C  | -0.852341 | -1.816028 | -0.134895 |
| H  | -1.648611 | -2.524093 | -0.376699 |
| H  | -0.583569 | -1.986144 | 0.912554  |
| H  | 0.006423  | -2.074110 | -0.761820 |
| C  | -1.747831 | -0.332225 | -1.914198 |
| H  | -2.626582 | -0.967163 | -2.061366 |
| H  | -0.951792 | -0.725608 | -2.554206 |
| H  | -2.010110 | 0.671085  | -2.250195 |
| C  | 0.051208  | 3.260467  | -0.861714 |
| H  | -0.509456 | 4.199413  | -0.844956 |
| H  | 0.366426  | 3.089254  | -1.899246 |
| H  | 0.964665  | 3.410834  | -0.275103 |
| C  | 0.188055  | 0.681628  | 1.447194  |
| H  | -0.537142 | 1.244434  | 2.040868  |
| H  | 0.170127  | -0.346784 | 1.822712  |
| C  | 1.082480  | 0.464634  | -0.914623 |
| H  | 1.539225  | 1.405640  | -1.228366 |
| H  | 0.848682  | -0.068698 | -1.836571 |
| C  | 1.583088  | 1.260727  | 1.707773  |
| H  | 1.633009  | 2.287309  | 1.329135  |
| H  | 1.774123  | 1.322820  | 2.782572  |
| C  | 2.137676  | -0.336051 | -0.142018 |
| H  | 1.718155  | -1.264092 | 0.233368  |
| C  | 2.730813  | 0.456367  | 1.041013  |
| Cl | 3.354579  | -0.793849 | 2.266794  |
| C  | 3.902819  | 1.374655  | 0.702822  |
| H  | 4.767997  | 0.809147  | 0.355916  |
| H  | 4.185241  | 1.954804  | 1.586376  |
| H  | 3.608141  | 2.073620  | -0.089653 |
| Br | 3.524086  | -0.984739 | -1.415722 |

SCF Energy (PCM/mPW1PW91/6-31+G\*\*) =  
-6264.56077054

Number of imaginary frequencies = 0

## 1I\_C006

## B3LYP/6-31G\* Geometry

|    |           |           |           |
|----|-----------|-----------|-----------|
| C  | 1.540106  | 1.395912  | 0.459114  |
| C  | 3.148865  | -0.481742 | 1.149755  |
| C  | 0.234074  | 0.491832  | 0.743259  |
| C  | 2.789353  | 0.560493  | 0.087045  |
| H  | 3.629661  | 0.079931  | 1.964847  |
| H  | 3.634531  | 1.225868  | -0.093529 |
| C  | 1.923036  | -1.141101 | 1.713287  |
| H  | 2.146695  | -2.000233 | 2.343962  |
| C  | 0.652526  | -0.717205 | 1.618470  |
| O  | 4.152633  | -1.400360 | 0.756128  |
| H  | 3.831840  | -1.834220 | -0.054376 |
| Br | 2.678684  | -0.368581 | -1.705851 |
| C  | 1.945874  | 2.145973  | 1.766359  |
| H  | 2.946742  | 2.579810  | 1.660216  |
| H  | 1.947512  | 1.492391  | 2.642359  |
| H  | 1.260302  | 2.974274  | 1.961828  |
| C  | 1.341154  | 2.483353  | -0.621767 |
| H  | 2.161801  | 3.207722  | -0.556340 |
| H  | 0.405931  | 3.033625  | -0.490425 |
| H  | 1.360228  | 2.074407  | -1.634191 |
| C  | -0.380932 | -1.441876 | 2.456286  |
| H  | 0.081523  | -2.286911 | 2.974930  |
| H  | -1.209155 | -1.829469 | 1.860131  |
| H  | -0.805578 | -0.784000 | 3.225513  |
| C  | -0.804162 | 1.387212  | 1.501269  |
| H  | -0.536509 | 1.439458  | 2.561305  |
| H  | -0.732781 | 2.409362  | 1.122055  |
| C  | -0.387226 | 0.013424  | -0.628522 |
| H  | 0.106077  | -0.899042 | -0.959766 |
| H  | -0.146146 | 0.768290  | -1.378548 |
| C  | -2.283146 | 0.985943  | 1.400128  |
| H  | -2.474275 | 0.036082  | 1.910717  |
| H  | -2.891682 | 1.743136  | 1.907269  |
| C  | -1.904339 | -0.179601 | -0.795202 |
| H  | -2.146316 | -0.139540 | -1.856195 |
| C  | -2.795501 | 0.806669  | -0.026129 |
| Cl | -2.577769 | 2.429150  | -0.948985 |
| C  | -4.292345 | 0.512762  | -0.081017 |
| H  | -4.630378 | 0.374058  | -1.112074 |
| H  | -4.849042 | 1.344599  | 0.359158  |
| H  | -4.514103 | -0.399040 | 0.479417  |
| Br | -2.459824 | -2.078148 | -0.385822 |

SCF Energy (PCM/mPW1PW91/6-31+G\*\*) =  
-6264.55841394

Number of imaginary frequencies = 0

## 1I\_C007

## B3LYP/6-31G\* Geometry

|    |           |           |           |
|----|-----------|-----------|-----------|
| C  | -1.322859 | -0.252447 | -0.366459 |
| C  | -3.261060 | 1.271696  | 0.516139  |
| C  | -0.238749 | 0.647394  | 0.414317  |
| C  | -2.661175 | -0.136736 | 0.415652  |
| H  | -3.988590 | 1.261226  | 1.335341  |
| H  | -2.514618 | -0.511366 | 1.429524  |
| C  | -2.171386 | 2.258478  | 0.816487  |
| H  | -2.528676 | 3.252153  | 1.082734  |
| C  | -0.851073 | 2.039802  | 0.729941  |
| O  | -4.031025 | 1.699158  | -0.605463 |
| H  | -3.418151 | 1.891937  | -1.331229 |
| Br | -4.086637 | -1.361254 | -0.267373 |
| C  | -0.940401 | -1.747133 | -0.438290 |
| H  | -1.656681 | -2.274104 | -1.072021 |
| H  | -0.968417 | -2.232417 | 0.541904  |
| H  | 0.049353  | -1.896799 | -0.872904 |
| C  | -1.502053 | 0.240327  | -1.823964 |
| H  | -2.446532 | -0.140413 | -2.224111 |
| H  | -0.702302 | -0.135767 | -2.469436 |
| H  | -1.496921 | 1.332930  | -1.907241 |
| C  | 0.070265  | 3.207074  | 1.034149  |
| H  | -0.496597 | 4.026612  | 1.484459  |
| H  | 0.551279  | 3.602168  | 0.130805  |
| H  | 0.873951  | 2.943980  | 1.732738  |
| C  | 0.188684  | 0.051098  | 1.802603  |
| H  | 0.521256  | 0.880317  | 2.436257  |
| H  | -0.683447 | -0.364778 | 2.317545  |
| C  | 1.063320  | 0.871504  | -0.435443 |
| H  | 1.556458  | 1.777220  | -0.083191 |
| H  | 0.814060  | 1.067835  | -1.479438 |
| C  | 1.301897  | -1.016048 | 1.797541  |
| H  | 1.583069  | -1.239470 | 2.833065  |
| H  | 0.943612  | -1.951711 | 1.366402  |
| C  | 2.133019  | -0.229562 | -0.395367 |
| H  | 1.826009  | -1.135131 | -0.911250 |
| C  | 2.569030  | -0.582698 | 1.032689  |
| Cl | 3.669910  | -2.067210 | 0.955525  |
| C  | 3.353862  | 0.511489  | 1.755888  |
| H  | 4.260795  | 0.766553  | 1.204925  |
| H  | 3.629578  | 0.170652  | 2.757433  |
| H  | 2.750026  | 1.419583  | 1.858430  |
| Br | 3.658446  | 0.396473  | -1.523948 |

SCF Energy (PCM/mPW1PW91/6-31+G\*\*) =  
-6264.56043422

Number of imaginary frequencies = 0

## 1I\_C008

## B3LYP/6-31G\* Geometry

|    |           |           |           |
|----|-----------|-----------|-----------|
| C  | 1.357778  | -0.667601 | 1.224644  |
| C  | 3.516091  | -0.862484 | -0.154406 |
| C  | 0.432203  | -1.082079 | -0.014162 |
| C  | 2.693392  | -0.000509 | 0.806245  |
| H  | 3.941455  | -1.672398 | 0.455628  |
| H  | 3.276167  | 0.233179  | 1.697778  |
| C  | 2.642527  | -1.472352 | -1.212543 |
| H  | 3.195325  | -1.873139 | -2.060668 |
| C  | 1.310662  | -1.626140 | -1.163978 |
| O  | 4.660746  | -0.217987 | -0.682851 |
| H  | 4.349957  | 0.595415  | -1.119020 |
| Br | 2.505517  | 1.843726  | 0.005147  |
| C  | 1.804360  | -1.947290 | 1.998636  |
| H  | 2.599691  | -1.701707 | 2.711561  |
| H  | 2.172337  | -2.731887 | 1.332181  |
| H  | 0.975477  | -2.360498 | 2.578048  |
| C  | 0.658348  | 0.247628  | 2.251592  |
| H  | 1.344241  | 0.446134  | 3.083766  |
| H  | -0.230100 | -0.226682 | 2.680386  |
| H  | 0.375307  | 1.215163  | 1.830546  |
| C  | 0.652766  | -2.365745 | -2.312817 |
| H  | 0.182441  | -3.300167 | -1.983221 |
| H  | 1.398356  | -2.626214 | -3.069291 |
| H  | -0.123933 | -1.774610 | -2.812315 |
| C  | -0.600818 | -2.169644 | 0.458898  |
| H  | -0.151235 | -3.166776 | 0.410626  |
| H  | -0.849827 | -2.003466 | 1.511998  |
| C  | -0.409898 | 0.119783  | -0.596147 |
| H  | -0.587289 | -0.040065 | -1.664612 |
| H  | 0.154222  | 1.046181  | -0.531152 |
| C  | -1.920689 | -2.171697 | -0.322189 |
| H  | -1.733837 | -2.323385 | -1.388605 |
| H  | -2.544905 | -3.009655 | 0.001683  |
| C  | -1.764470 | 0.297897  | 0.096558  |
| H  | -1.635966 | 0.396002  | 1.168413  |
| C  | -2.740205 | -0.864122 | -0.187953 |
| Cl | -3.845925 | -1.020794 | 1.302863  |
| C  | -3.651868 | -0.690019 | -1.400205 |
| H  | -4.344033 | 0.141377  | -1.265447 |
| H  | -4.222329 | -1.608358 | -1.568720 |
| H  | -3.044532 | -0.489354 | -2.291301 |
| Br | -2.513611 | 2.083661  | -0.383066 |

SCF Energy (PCM/mPW1PW91/6-31+G\*\*) =  
-6264.56191906

Number of imaginary frequencies = 0

## 1I\_C009

## B3LYP/6-31G\* Geometry

|    |           |           |           |
|----|-----------|-----------|-----------|
| C  | 1.456680  | 0.266327  | -0.570909 |
| C  | 2.767277  | -1.493210 | 0.820282  |
| C  | 0.060035  | -0.230834 | 0.086638  |
| C  | 2.563641  | -0.023389 | 0.472449  |
| H  | 3.303929  | -1.541570 | 1.781541  |
| H  | 2.332024  | 0.510121  | 1.394482  |
| C  | 1.432724  | -2.171557 | 0.950163  |
| H  | 1.479933  | -3.185939 | 1.350455  |
| C  | 0.236263  | -1.686955 | 0.583151  |
| O  | 3.564075  | -2.135349 | -0.182299 |
| H  | 3.503848  | -3.091166 | -0.026647 |
| Br | 4.337162  | 0.766970  | -0.014615 |
| C  | 1.461210  | 1.784041  | -0.875933 |
| H  | 2.312961  | 2.018095  | -1.518169 |
| H  | 1.569132  | 2.398233  | 0.023040  |
| H  | 0.555394  | 2.110399  | -1.392238 |
| C  | 1.731481  | -0.479915 | -1.897837 |
| H  | 2.766279  | -0.302710 | -2.202372 |
| H  | 1.080375  | -0.110338 | -2.696585 |
| H  | 1.599082  | -1.559234 | -1.806402 |
| C  | -0.954289 | -2.603114 | 0.738950  |
| H  | -0.640946 | -3.554934 | 1.178774  |
| H  | -1.431964 | -2.820057 | -0.221049 |
| H  | -1.738049 | -2.183641 | 1.376401  |
| C  | -0.296102 | 0.657343  | 1.332274  |
| H  | 0.226343  | 0.268502  | 2.211906  |
| H  | 0.074281  | 1.671547  | 1.173391  |
| C  | -1.042302 | -0.086839 | -1.030937 |
| H  | -1.082949 | -0.992204 | -1.640313 |
| H  | -0.707232 | 0.698361  | -1.710980 |
| C  | -1.785362 | 0.777190  | 1.678465  |
| H  | -2.200446 | -0.187693 | 1.996036  |
| H  | -1.901746 | 1.461445  | 2.526403  |
| C  | -2.492882 | 0.336479  | -0.697953 |
| H  | -2.924142 | 0.816564  | -1.574405 |
| C  | -2.661421 | 1.257010  | 0.522726  |
| Cl | -2.021213 | 2.917809  | -0.071357 |
| C  | -4.103291 | 1.519812  | 0.953436  |
| H  | -4.722871 | 1.821843  | 0.104261  |
| H  | -4.121232 | 2.318247  | 1.700211  |
| H  | -4.535693 | 0.616796  | 1.391620  |
| Br | -3.742598 | -1.242255 | -0.532176 |

SCF Energy (PCM/mPW1PW91/6-31+G\*\*) =  
-6264.55222128

Number of imaginary frequencies = 0

## 1I\_C010

## B3LYP/6-31G\* Geometry

|    |           |           |           |
|----|-----------|-----------|-----------|
| C  | 1.452180  | 0.272993  | -0.566954 |
| C  | 2.766231  | -1.481635 | 0.851294  |
| C  | 0.057752  | -0.230369 | 0.086055  |
| C  | 2.560719  | -0.006470 | 0.478252  |
| H  | 3.276324  | -1.510510 | 1.820965  |
| H  | 2.330364  | 0.546894  | 1.389423  |
| C  | 1.435638  | -2.171687 | 0.948367  |
| H  | 1.499592  | -3.194257 | 1.317452  |
| C  | 0.239809  | -1.690804 | 0.570484  |
| O  | 3.641361  | -2.218421 | -0.001345 |
| H  | 3.187380  | -2.352908 | -0.847313 |
| Br | 4.332181  | 0.765657  | -0.034937 |
| C  | 1.453352  | 1.787599  | -0.886302 |
| H  | 2.311770  | 2.021694  | -1.519782 |
| H  | 1.548580  | 2.407016  | 0.010075  |
| H  | 0.551933  | 2.106528  | -1.414696 |
| C  | 1.731531  | -0.479903 | -1.891635 |
| H  | 2.781201  | -0.348212 | -2.172332 |
| H  | 1.124709  | -0.080171 | -2.709798 |
| H  | 1.513894  | -1.550793 | -1.821600 |
| C  | -0.945569 | -2.618601 | 0.697539  |
| H  | -0.627643 | -3.574572 | 1.124140  |
| H  | -1.415703 | -2.823856 | -0.268973 |
| H  | -1.736781 | -2.214989 | 1.336394  |
| C  | -0.296777 | 0.650690  | 1.336241  |
| H  | 0.227170  | 0.256414  | 2.212341  |
| H  | 0.070859  | 1.667083  | 1.183843  |
| C  | -1.044875 | -0.081863 | -1.031491 |
| H  | -1.087984 | -0.985912 | -1.642828 |
| H  | -0.711416 | 0.705452  | -1.710005 |
| C  | -1.786066 | 0.763622  | 1.683363  |
| H  | -2.198235 | -0.205732 | 1.991184  |
| H  | -1.904237 | 1.439365  | 2.537750  |
| C  | -2.495759 | 0.339369  | -0.695029 |
| H  | -2.927362 | 0.825400  | -1.568038 |
| C  | -2.662393 | 1.252211  | 0.531544  |
| Cl | -2.020333 | 2.915960  | -0.053474 |
| C  | -4.103677 | 1.513734  | 0.964654  |
| H  | -4.723485 | 1.821955  | 0.117886  |
| H  | -4.120295 | 2.307243  | 1.716650  |
| H  | -4.536645 | 0.608298  | 1.397247  |
| Br | -3.743374 | -1.240191 | -0.537019 |

SCF Energy (PCM/mPW1PW91/6-31+G\*\*) =  
-6264.55428764

Number of imaginary frequencies = 0

## 1I\_C011

## B3LYP/6-31G\* Geometry

|    |           |           |           |
|----|-----------|-----------|-----------|
| C  | -1.344530 | -0.370012 | -0.426099 |
| C  | -3.181351 | 1.350048  | 0.218221  |
| C  | -0.224272 | 0.723240  | -0.061813 |
| C  | -2.557836 | -0.026442 | 0.475604  |
| H  | -3.739588 | 1.639672  | 1.122738  |
| H  | -2.252473 | -0.068602 | 1.520212  |
| C  | -2.115706 | 2.372640  | -0.085861 |
| H  | -2.490845 | 3.390105  | -0.209151 |
| C  | -0.816312 | 2.131067  | -0.310839 |
| O  | -4.094473 | 1.273107  | -0.882855 |
| H  | -4.433466 | 2.168690  | -1.038825 |
| Br | -4.004055 | -1.405930 | 0.437065  |
| C  | -0.865402 | -1.811584 | -0.149184 |
| H  | -1.656596 | -2.514702 | -0.418020 |
| H  | -0.620812 | -1.998788 | 0.901285  |
| H  | 0.007079  | -2.058601 | -0.761481 |
| C  | -1.739669 | -0.311105 | -1.921012 |
| H  | -2.651118 | -0.896520 | -2.070717 |
| H  | -0.958849 | -0.747344 | -2.552320 |
| H  | -1.945120 | 0.703267  | -2.264811 |
| C  | 0.053915  | 3.277066  | -0.782825 |
| H  | -0.501492 | 4.218654  | -0.739020 |
| H  | 0.370713  | 3.134848  | -1.824310 |
| H  | 0.966952  | 3.405184  | -0.190944 |
| C  | 0.183521  | 0.653649  | 1.459866  |
| H  | -0.541635 | 1.204354  | 2.064764  |
| H  | 0.164100  | -0.381699 | 1.814750  |
| C  | 1.075474  | 0.477028  | -0.906714 |
| H  | 1.531928  | 1.422136  | -1.208942 |
| H  | 0.839549  | -0.044079 | -1.835081 |
| C  | 1.578822  | 1.226482  | 1.733400  |
| H  | 1.629089  | 2.262632  | 1.381912  |
| H  | 1.769880  | 1.261169  | 2.809452  |
| C  | 2.133217  | -0.333689 | -0.148008 |
| H  | 1.715460  | -1.268074 | 0.213360  |
| C  | 2.727616  | 0.440130  | 1.046284  |
| Cl | 3.364598  | -0.828270 | 2.245964  |
| C  | 3.893248  | 1.370520  | 0.718894  |
| H  | 4.758832  | 0.815885  | 0.355765  |
| H  | 4.178507  | 1.934884  | 1.611723  |
| H  | 3.590472  | 2.083255  | -0.058190 |
| Br | 3.518987  | -0.959351 | -1.434270 |

SCF Energy (PCM/mPW1PW91/6-31+G\*\*) =  
-6264.55620953

Number of imaginary frequencies = 0

## 1I\_C012

## B3LYP/6-31G\* Geometry

|    |           |           |           |
|----|-----------|-----------|-----------|
| C  | -1.340228 | -0.827581 | -1.090555 |
| C  | -3.563323 | -0.760564 | 0.177622  |
| C  | -0.486208 | -1.031260 | 0.259866  |
| C  | -2.681093 | -0.073268 | -0.850725 |
| H  | -3.902289 | -1.701098 | -0.292934 |
| H  | -3.213440 | 0.012580  | -1.798889 |
| C  | -2.770043 | -1.090177 | 1.406600  |
| H  | -3.359084 | -1.261020 | 2.308442  |
| C  | -1.440775 | -1.246431 | 1.466547  |
| O  | -4.706993 | 0.043498  | 0.439542  |
| H  | -5.266547 | -0.443494 | 1.064663  |
| Br | -2.466449 | 1.852166  | -0.343527 |
| C  | -1.752322 | -2.208175 | -1.679320 |
| H  | -2.498957 | -2.075526 | -2.470801 |
| H  | -2.172400 | -2.882752 | -0.927598 |
| H  | -0.891639 | -2.706524 | -2.135100 |
| C  | -0.611651 | -0.077201 | -2.228853 |
| H  | -1.276323 | -0.028962 | -3.100090 |
| H  | 0.296357  | -0.589656 | -2.552132 |
| H  | -0.368440 | 0.952088  | -1.960605 |
| C  | -0.856858 | -1.681385 | 2.801297  |
| H  | -1.576691 | -1.497198 | 3.603976  |
| H  | 0.065415  | -1.153958 | 3.066446  |
| H  | -0.624658 | -2.753866 | 2.815457  |
| C  | 0.459425  | -2.277065 | 0.198342  |
| H  | 0.769887  | -2.510440 | 1.219584  |
| H  | -0.079989 | -3.163124 | -0.145474 |
| C  | 0.427867  | 0.199784  | 0.619455  |
| H  | 0.677259  | 0.146209  | 1.682091  |
| H  | -0.129118 | 1.126882  | 0.493908  |
| C  | 1.742308  | -2.110400 | -0.631574 |
| H  | 2.330516  | -3.033752 | -0.579387 |
| H  | 1.516235  | -1.949972 | -1.688718 |
| C  | 1.755994  | 0.322528  | -0.148592 |
| H  | 1.600755  | 0.613063  | -1.182303 |
| C  | 2.617415  | -0.947722 | -0.118218 |
| Cl | 3.995811  | -0.746176 | -1.340255 |
| C  | 3.268475  | -1.252983 | 1.230888  |
| H  | 3.942277  | -0.446495 | 1.523716  |
| H  | 3.834836  | -2.186543 | 1.171027  |
| H  | 2.509176  | -1.358737 | 2.013209  |
| Br | 2.721596  | 1.907855  | 0.591037  |

SCF Energy (PCM/mPW1PW91/6-31+G\*\*) =  
-6264.55945497

Number of imaginary frequencies = 0

## 1I\_C013

## B3LYP/6-31G\* Geometry

|    |           |           |           |
|----|-----------|-----------|-----------|
| C  | 1.364879  | -0.653097 | 1.223799  |
| C  | 3.510579  | -0.848767 | -0.145755 |
| C  | 0.436804  | -1.078615 | -0.009735 |
| C  | 2.694126  | 0.029766  | 0.792823  |
| H  | 3.912541  | -1.662375 | 0.484864  |
| H  | 3.278143  | 0.256321  | 1.685644  |
| C  | 2.645027  | -1.462469 | -1.207709 |
| H  | 3.187933  | -1.868393 | -2.062279 |
| C  | 1.315246  | -1.626785 | -1.157070 |
| O  | 4.608032  | -0.109539 | -0.667764 |
| H  | 5.146021  | -0.722992 | -1.192557 |
| Br | 2.487414  | 1.855970  | 0.000402  |
| C  | 1.810798  | -1.926116 | 2.007517  |
| H  | 2.610731  | -1.674752 | 2.713341  |
| H  | 2.173143  | -2.720088 | 1.348714  |
| H  | 0.984692  | -2.332060 | 2.596300  |
| C  | 0.662799  | 0.265818  | 2.245606  |
| H  | 1.348525  | 0.468780  | 3.076934  |
| H  | -0.224723 | -0.208662 | 2.676382  |
| H  | 0.381455  | 1.231229  | 1.819748  |
| C  | 0.660255  | -2.375698 | -2.301187 |
| H  | 0.192906  | -3.309416 | -1.965509 |
| H  | 1.405260  | -2.638365 | -3.057796 |
| H  | -0.118313 | -1.789542 | -2.803157 |
| C  | -0.591770 | -2.166685 | 0.471152  |
| H  | -0.139357 | -3.163026 | 0.430236  |
| H  | -0.840114 | -1.993501 | 1.523183  |
| C  | -0.409170 | 0.116832  | -0.599653 |
| H  | -0.587105 | -0.049770 | -1.667079 |
| H  | 0.154632  | 1.043922  | -0.539365 |
| C  | -1.912561 | -2.178796 | -0.308443 |
| H  | -1.726680 | -2.337708 | -1.374044 |
| H  | -2.533973 | -3.016216 | 0.022237  |
| C  | -1.763338 | 0.294116  | 0.093677  |
| H  | -1.633415 | 0.399106  | 1.164704  |
| C  | -2.735559 | -0.872532 | -0.183112 |
| Cl | -3.841826 | -1.023659 | 1.308657  |
| C  | -3.647674 | -0.709105 | -1.396458 |
| H  | -4.341767 | 0.121528  | -1.267231 |
| H  | -4.215700 | -1.630037 | -1.559129 |
| H  | -3.040618 | -0.512406 | -2.288657 |
| Br | -2.520845 | 2.073736  | -0.395352 |

SCF Energy (PCM/mPW1PW91/6-31+G\*\*) =  
-6264.55659758

Number of imaginary frequencies = 0

## 1I\_C014

## B3LYP/6-31G\* Geometry

|    |           |           |           |
|----|-----------|-----------|-----------|
| C  | 1.546196  | 0.331305  | -0.560633 |
| C  | 2.920113  | -1.358540 | 0.874365  |
| C  | 0.180542  | -0.166373 | 0.148114  |
| C  | 2.676261  | 0.099475  | 0.466823  |
| H  | 3.477137  | -1.340909 | 1.826237  |
| H  | 2.492723  | 0.685179  | 1.367674  |
| C  | 1.603279  | -2.040845 | 1.093062  |
| H  | 1.682049  | -3.029809 | 1.540162  |
| C  | 0.395106  | -1.565610 | 0.761458  |
| O  | 3.643343  | -2.134183 | -0.074117 |
| H  | 4.485456  | -1.669488 | -0.228395 |
| Br | 4.452847  | 0.852139  | -0.123956 |
| C  | 1.492572  | 1.833624  | -0.918040 |
| H  | 2.398971  | 2.114115  | -1.459516 |
| H  | 1.434021  | 2.477378  | -0.034562 |
| H  | 0.644986  | 2.069455  | -1.568565 |
| C  | 1.825255  | -0.460731 | -1.860371 |
| H  | 2.835647  | -0.231384 | -2.210582 |
| H  | 1.131401  | -0.172577 | -2.655488 |
| H  | 1.767151  | -1.539832 | -1.711345 |
| C  | -0.811069 | -2.420390 | 1.073177  |
| H  | -0.500568 | -3.355260 | 1.548457  |
| H  | -1.389526 | -2.671578 | 0.180236  |
| H  | -1.508446 | -1.921490 | 1.756334  |
| C  | -0.246392 | 0.800000  | 1.310251  |
| H  | -0.613464 | 0.207233  | 2.154169  |
| H  | 0.623683  | 1.334475  | 1.701628  |
| C  | -0.933998 | -0.175295 | -0.960507 |
| H  | -0.943195 | -1.135631 | -1.478548 |
| H  | -0.627619 | 0.548479  | -1.718161 |
| C  | -1.317466 | 1.835240  | 0.932560  |
| H  | -1.494154 | 2.509963  | 1.777125  |
| H  | -0.979706 | 2.458478  | 0.099635  |
| C  | -2.407448 | 0.234992  | -0.664556 |
| H  | -2.759456 | 0.758001  | -1.548543 |
| C  | -2.649053 | 1.163532  | 0.559789  |
| Cl | -3.791369 | 2.525941  | -0.002715 |
| C  | -3.333632 | 0.539887  | 1.776937  |
| H  | -4.330132 | 0.178861  | 1.522619  |
| H  | -3.417335 | 1.288887  | 2.569565  |
| H  | -2.759494 | -0.308907 | 2.157341  |
| Br | -3.652424 | -1.338505 | -0.708700 |

SCF Energy (PCM/mPW1PW91/6-31+G\*\*) =  
-6264.55105401

Number of imaginary frequencies = 0

## 1l\_C015

## B3LYP/6-31G\* Geometry

|    |           |           |           |
|----|-----------|-----------|-----------|
| C  | 1.355693  | -0.324374 | 0.472005  |
| C  | 2.820044  | 1.614996  | -0.471638 |
| C  | 0.003014  | 0.460913  | 0.055842  |
| C  | 2.452288  | 0.129502  | -0.516303 |
| H  | 3.304073  | 1.864497  | -1.431100 |
| H  | 2.167324  | -0.131902 | -1.535286 |
| C  | 1.570773  | 2.427454  | -0.322474 |
| H  | 1.734854  | 3.500174  | -0.402428 |
| C  | 0.337415  | 1.975183  | -0.052877 |
| O  | 3.682754  | 1.989200  | 0.596851  |
| H  | 4.474540  | 1.426619  | 0.522965  |
| Br | 4.173140  | -0.910970 | -0.327323 |
| C  | 1.217943  | -1.857484 | 0.375261  |
| H  | 2.083732  | -2.330724 | 0.845034  |
| H  | 1.190486  | -2.208610 | -0.661233 |
| H  | 0.326919  | -2.225131 | 0.885344  |
| C  | 1.756252  | 0.020557  | 1.926975  |
| H  | 2.764240  | -0.357874 | 2.119605  |
| H  | 1.084711  | -0.461899 | 2.644072  |
| H  | 1.766639  | 1.094448  | 2.116844  |
| C  | -0.751401 | 3.019992  | 0.069300  |
| H  | -0.310586 | 4.019509  | 0.016340  |
| H  | -1.304060 | 2.950894  | 1.011311  |
| H  | -1.496612 | 2.940400  | -0.727606 |
| C  | -0.585722 | 0.040269  | -1.333556 |
| H  | -1.238987 | 0.854359  | -1.662526 |
| H  | 0.209250  | -0.015646 | -2.083906 |
| C  | -1.104375 | 0.171787  | 1.140145  |
| H  | -1.204424 | 1.007626  | 1.835404  |
| H  | -0.781634 | -0.674635 | 1.752889  |
| C  | -1.407967 | -1.265336 | -1.409806 |
| H  | -1.873268 | -1.298652 | -2.402021 |
| H  | -0.759420 | -2.138301 | -1.355972 |
| C  | -2.509740 | -0.249753 | 0.677418  |
| H  | -3.095343 | -0.534618 | 1.549529  |
| C  | -2.535411 | -1.399657 | -0.351912 |
| Cl | -2.222480 | -2.930065 | 0.704679  |
| C  | -3.896570 | -1.668723 | -0.994042 |
| H  | -4.686275 | -1.755447 | -0.242620 |
| H  | -3.850101 | -2.601515 | -1.563121 |
| H  | -4.154048 | -0.854056 | -1.675407 |
| Br | -3.612148 | 1.289714  | -0.012576 |

SCF Energy (PCM/mPW1PW91/6-31+G\*\*) =  
-6264.55081144

Number of imaginary frequencies = 0

## 1m\_C001

## B3LYP/6-31G\* Geometry

|    |           |           |           |
|----|-----------|-----------|-----------|
| C  | 1.482903  | 0.689219  | 0.538605  |
| C  | 2.457443  | -1.652430 | -0.082146 |
| C  | -0.002205 | 0.038807  | 0.604446  |
| C  | 2.272472  | -0.177370 | -0.464906 |
| H  | 2.655194  | -2.213353 | -1.011242 |
| H  | 1.802368  | -0.122836 | -1.446325 |
| C  | 1.215213  | -2.174259 | 0.579792  |
| H  | 1.282128  | -3.225216 | 0.853706  |
| C  | 0.142795  | -1.464380 | 0.957245  |
| O  | 3.511245  | -1.895430 | 0.845129  |
| H  | 4.318331  | -1.514074 | 0.455406  |
| Br | 4.100687  | 0.570192  | -0.885986 |
| C  | 2.140325  | 0.682561  | 1.936636  |
| H  | 3.197947  | 0.944645  | 1.838981  |
| H  | 2.087721  | -0.293405 | 2.420996  |
| H  | 1.671784  | 1.429567  | 2.585306  |
| C  | 1.480479  | 2.153175  | 0.032284  |
| H  | 2.452377  | 2.606879  | 0.241136  |
| H  | 0.720634  | 2.763197  | 0.526291  |
| H  | 1.325161  | 2.234033  | -1.048333 |
| C  | -0.896301 | -2.179259 | 1.797891  |
| H  | -1.026672 | -1.697310 | 2.774308  |
| H  | -0.578046 | -3.208737 | 1.985811  |
| H  | -1.872727 | -2.219589 | 1.310646  |
| C  | -0.825783 | 0.801454  | 1.687238  |
| H  | -0.527639 | 0.461241  | 2.683271  |
| H  | -0.571644 | 1.862181  | 1.646107  |
| C  | -0.685510 | 0.226087  | -0.801164 |
| H  | -0.325053 | -0.532172 | -1.500347 |
| H  | -0.376009 | 1.195354  | -1.200033 |
| C  | -2.356777 | 0.707008  | 1.578687  |
| H  | -2.708851 | -0.304382 | 1.805375  |
| H  | -2.808279 | 1.368399  | 2.326487  |
| C  | -2.214271 | 0.261864  | -0.904714 |
| H  | -2.500053 | 0.655813  | -1.879365 |
| C  | -2.923069 | 1.058094  | 0.203401  |
| Cl | -2.489111 | 2.845577  | -0.175837 |
| C  | -4.447591 | 0.993745  | 0.161295  |
| H  | -4.869677 | 1.696949  | 0.884319  |
| H  | -4.784593 | -0.016112 | 0.409358  |
| H  | -4.825376 | 1.248286  | -0.833387 |
| Br | -2.973682 | -1.602095 | -1.015381 |

SCF Energy (PCM/mPW1PW91/6-31+G\*\*) =  
-6264.56334019

Number of imaginary frequencies = 0

## 1m\_C002

## B3LYP/6-31G\* Geometry

|    |           |           |           |
|----|-----------|-----------|-----------|
| C  | -1.355130 | 0.161943  | 0.748433  |
| C  | -3.016100 | 0.810932  | -1.156580 |
| C  | -0.190142 | 1.009414  | 0.033201  |
| C  | -2.315482 | -0.302421 | -0.368903 |
| H  | -3.366425 | 0.368737  | -2.104307 |
| H  | -1.788262 | -0.948026 | -1.071889 |
| C  | -2.035139 | 1.904109  | -1.459818 |
| H  | -2.409206 | 2.661135  | -2.146474 |
| C  | -0.809725 | 2.040707  | -0.935794 |
| O  | -4.116414 | 1.417605  | -0.489298 |
| H  | -4.733309 | 0.698467  | -0.262845 |
| Br | -3.756088 | -1.549792 | 0.294225  |
| C  | -2.099010 | 1.033887  | 1.787153  |
| H  | -2.981407 | 0.495730  | 2.145063  |
| H  | -2.440218 | 1.981603  | 1.367959  |
| H  | -1.461628 | 1.235011  | 2.653144  |
| C  | -0.806594 | -1.082638 | 1.480061  |
| H  | -1.618798 | -1.575836 | 2.018919  |
| H  | -0.045203 | -0.816688 | 2.219069  |
| H  | -0.383642 | -1.823663 | 0.793184  |
| C  | 0.009087  | 3.237636  | -1.374409 |
| H  | -0.572975 | 3.862695  | -2.057269 |
| H  | 0.925545  | 2.946926  | -1.903742 |
| H  | 0.311443  | 3.867064  | -0.529790 |
| C  | 0.680776  | 1.710382  | 1.131710  |
| H  | 0.220685  | 2.658183  | 1.427367  |
| H  | 0.695472  | 1.094633  | 2.036022  |
| C  | 0.771319  | 0.105415  | -0.830301 |
| H  | 1.145050  | 0.677302  | -1.686503 |
| H  | 0.228240  | -0.739101 | -1.258874 |
| C  | 2.137009  | 1.958709  | 0.716849  |
| H  | 2.174901  | 2.582274  | -0.180270 |
| H  | 2.657728  | 2.517804  | 1.499605  |
| C  | 1.970962  | -0.434448 | -0.043275 |
| H  | 1.636578  | -0.982249 | 0.829615  |
| C  | 2.947883  | 0.674546  | 0.406217  |
| Cl | 3.736268  | 0.085279  | 1.985836  |
| C  | 4.083269  | 0.995168  | -0.563417 |
| H  | 4.652087  | 1.854088  | -0.194947 |
| H  | 3.667488  | 1.249650  | -1.546097 |
| H  | 4.756976  | 0.147111  | -0.686745 |
| Br | 2.850538  | -1.871450 | -1.112276 |

SCF Energy (PCM/mPW1PW91/6-31+G\*\*) =  
-6264.56321003

Number of imaginary frequencies = 0

## 1m\_C003

## B3LYP/6-31G\* Geometry

|    |           |           |           |
|----|-----------|-----------|-----------|
| C  | -1.367526 | 0.096090  | 0.759800  |
| C  | -3.056018 | 0.827225  | -1.100374 |
| C  | -0.228001 | 1.042040  | 0.116052  |
| C  | -2.308586 | -0.310613 | -0.401207 |
| H  | -3.411586 | 0.437649  | -2.068719 |
| H  | -1.752326 | -0.874787 | -1.150380 |
| C  | -2.105860 | 1.957831  | -1.348510 |
| H  | -2.492314 | 2.734677  | -2.005410 |
| C  | -0.887091 | 2.098637  | -0.811964 |
| O  | -4.159527 | 1.355462  | -0.374184 |
| H  | -4.758238 | 0.607035  | -0.199702 |
| Br | -3.704808 | -1.665264 | 0.142216  |
| C  | -2.149859 | 0.846307  | 1.862149  |
| H  | -3.053320 | 0.282871  | 2.111092  |
| H  | -2.462061 | 1.844660  | 1.550443  |
| H  | -1.552661 | 0.926259  | 2.776258  |
| C  | -0.809358 | -1.201364 | 1.387120  |
| H  | -1.619023 | -1.736252 | 1.888770  |
| H  | -0.044937 | -0.998713 | 2.137421  |
| H  | -0.396598 | -1.886242 | 0.639216  |
| C  | -0.104492 | 3.344083  | -1.188572 |
| H  | -0.581745 | 3.846906  | -2.034137 |
| H  | 0.930505  | 3.127391  | -1.480036 |
| H  | -0.060358 | 4.066371  | -0.364350 |
| C  | 0.610476  | 1.793713  | 1.202194  |
| H  | 1.062283  | 2.668746  | 0.732210  |
| H  | -0.044097 | 2.193946  | 1.980436  |
| C  | 0.780830  | 0.257976  | -0.803658 |
| H  | 1.218842  | 0.964672  | -1.514769 |
| H  | 0.250245  | -0.473543 | -1.418961 |
| C  | 1.760681  | 1.016190  | 1.867213  |
| H  | 2.310993  | 1.696490  | 2.527197  |
| H  | 1.391534  | 0.208926  | 2.502538  |
| C  | 1.945213  | -0.468372 | -0.107565 |
| H  | 1.607907  | -1.341349 | 0.442520  |
| C  | 2.752647  | 0.429060  | 0.840684  |
| Cl | 3.925901  | -0.640280 | 1.792132  |
| C  | 3.595036  | 1.500983  | 0.150130  |
| H  | 4.134959  | 2.090171  | 0.896293  |
| H  | 2.960163  | 2.180088  | -0.428694 |
| H  | 4.314584  | 1.045252  | -0.531990 |
| Br | 3.076654  | -1.276132 | -1.542244 |

SCF Energy (PCM/mPW1PW91/6-31+G\*\*) =  
-6264.56365564

Number of imaginary frequencies = 0

## 1m\_C004

## B3LYP/6-31G\* Geometry

|    |           |           |           |
|----|-----------|-----------|-----------|
| C  | 1.489919  | 0.676518  | 0.541327  |
| C  | 2.471699  | -1.651804 | -0.084556 |
| C  | 0.004807  | 0.031760  | 0.604656  |
| C  | 2.296237  | -0.183835 | -0.463623 |
| H  | 2.710437  | -2.213680 | -1.001672 |
| H  | 1.806112  | -0.145951 | -1.435903 |
| C  | 1.212840  | -2.181919 | 0.545620  |
| H  | 1.247972  | -3.247040 | 0.782032  |
| C  | 0.143179  | -1.475526 | 0.939921  |
| O  | 3.559541  | -1.790602 | 0.838346  |
| H  | 3.547528  | -2.705999 | 1.159914  |
| Br | 4.091438  | 0.586313  | -0.899948 |
| C  | 2.140577  | 0.674179  | 1.942680  |
| H  | 3.205053  | 0.904407  | 1.845540  |
| H  | 2.060574  | -0.293022 | 2.441593  |
| H  | 1.686077  | 1.440366  | 2.579255  |
| C  | 1.485639  | 2.141354  | 0.036407  |
| H  | 2.451657  | 2.600143  | 0.258494  |
| H  | 0.713566  | 2.745128  | 0.519394  |
| H  | 1.347933  | 2.221459  | -1.046574 |
| C  | -0.898637 | -2.198397 | 1.769464  |
| H  | -1.024078 | -1.730426 | 2.753335  |
| H  | -0.588801 | -3.233762 | 1.940614  |
| H  | -1.875895 | -2.223690 | 1.283314  |
| C  | -0.817392 | 0.784972  | 1.695284  |
| H  | -0.519139 | 0.435307  | 2.688153  |
| H  | -0.559661 | 1.845084  | 1.664093  |
| C  | -0.681069 | 0.231448  | -0.798067 |
| H  | -0.322221 | -0.520018 | -1.505238 |
| H  | -0.369161 | 1.203571  | -1.187683 |
| C  | -2.348964 | 0.696203  | 1.587675  |
| H  | -2.705017 | -0.315460 | 1.807001  |
| H  | -2.797575 | 1.353238  | 2.341062  |
| C  | -2.209604 | 0.272380  | -0.900048 |
| H  | -2.495195 | 0.675982  | -1.870775 |
| C  | -2.916330 | 1.059733  | 0.215978  |
| Cl | -2.481209 | 2.849234  | -0.148354 |
| C  | -4.441071 | 0.997262  | 0.175540  |
| H  | -4.861210 | 1.694647  | 0.905321  |
| H  | -4.779028 | -0.014312 | 0.415259  |
| H  | -4.820118 | 1.260997  | -0.816254 |
| Br | -2.975627 | -1.589030 | -1.030183 |

SCF Energy (PCM/mPW1PW91/6-31+G\*\*) =  
-6264.55886529

Number of imaginary frequencies = 0

## 1m\_C005

## B3LYP/6-31G\* Geometry

|    |           |           |           |
|----|-----------|-----------|-----------|
| C  | 1.164017  | -0.190581 | -1.089919 |
| C  | 3.264966  | -1.472929 | -0.326316 |
| C  | 0.419692  | -0.420520 | 0.317915  |
| C  | 2.710845  | -0.200897 | -0.964925 |
| H  | 3.142577  | -2.270716 | -1.073101 |
| H  | 3.156732  | -0.043002 | -1.947469 |
| C  | 2.477995  | -1.823243 | 0.901129  |
| H  | 2.984080  | -2.516684 | 1.570865  |
| C  | 1.236419  | -1.410592 | 1.193904  |
| O  | 4.662972  | -1.445988 | -0.102566 |
| H  | 4.841204  | -0.670274 | 0.458639  |
| Br | 3.473390  | 1.379351  | 0.041732  |
| C  | 0.787861  | 1.105798  | -1.843265 |
| H  | 1.325703  | 1.125718  | -2.798898 |
| H  | 1.074641  | 2.005692  | -1.296638 |
| H  | -0.276904 | 1.159880  | -2.078819 |
| C  | 0.851249  | -1.364451 | -2.066164 |
| H  | 1.522281  | -1.327686 | -2.931951 |
| H  | -0.168438 | -1.284728 | -2.453872 |
| H  | 0.957824  | -2.346236 | -1.596694 |
| C  | 0.603004  | -1.974257 | 2.456188  |
| H  | 1.375086  | -2.399073 | 3.103750  |
| H  | -0.108068 | -2.779287 | 2.231674  |
| H  | 0.060111  | -1.226565 | 3.044362  |
| C  | 0.212291  | 0.890188  | 1.156507  |
| H  | 0.049540  | 0.595981  | 2.197952  |
| H  | 1.130915  | 1.477073  | 1.162137  |
| C  | -1.004958 | -1.057070 | 0.142074  |
| H  | -1.327272 | -1.445933 | 1.109430  |
| H  | -0.971230 | -1.922611 | -0.520092 |
| C  | -0.958123 | 1.804766  | 0.740934  |
| H  | -1.064632 | 2.600591  | 1.487238  |
| H  | -0.749283 | 2.302181  | -0.205930 |
| C  | -2.110134 | -0.109943 | -0.336508 |
| H  | -1.933460 | 0.260796  | -1.343708 |
| C  | -2.313202 | 1.075911  | 0.618296  |
| Cl | -3.488143 | 2.266683  | -0.175857 |
| C  | -2.909520 | 0.711004  | 1.977843  |
| H  | -3.048480 | 1.616393  | 2.574500  |
| H  | -2.239429 | 0.041495  | 2.527706  |
| H  | -3.872599 | 0.211220  | 1.860242  |
| Br | -3.772266 | -1.193895 | -0.571371 |

SCF Energy (PCM/mPW1PW91/6-31+G\*\*) =  
-6264.56342693

Number of imaginary frequencies = 0



## 1m\_C006

## B3LYP/6-31G\* Geometry

|    |           |           |           |
|----|-----------|-----------|-----------|
| C  | -1.363166 | 0.163483  | 0.749559  |
| C  | -3.027315 | 0.810530  | -1.142945 |
| C  | -0.197168 | 1.010085  | 0.038044  |
| C  | -2.337730 | -0.303266 | -0.362407 |
| H  | -3.414961 | 0.372899  | -2.076415 |
| H  | -1.797261 | -0.920757 | -1.080281 |
| C  | -2.033170 | 1.890800  | -1.467939 |
| H  | -2.384645 | 2.635857  | -2.183684 |
| C  | -0.811820 | 2.038990  | -0.935647 |
| O  | -4.124036 | 1.341713  | -0.391452 |
| H  | -4.498388 | 2.072987  | -0.907470 |
| Br | -3.735723 | -1.576856 | 0.288806  |
| C  | -2.099560 | 1.031067  | 1.797174  |
| H  | -3.000992 | 0.508751  | 2.128605  |
| H  | -2.412675 | 1.995022  | 1.392652  |
| H  | -1.468396 | 1.202008  | 2.674440  |
| C  | -0.811605 | -1.083711 | 1.474624  |
| H  | -1.620970 | -1.576520 | 2.016955  |
| H  | -0.043577 | -0.819793 | 2.207649  |
| H  | -0.396546 | -1.824680 | 0.782821  |
| C  | 0.007093  | 3.234771  | -1.376008 |
| H  | -0.569722 | 3.855981  | -2.067265 |
| H  | 0.928073  | 2.942721  | -1.896125 |
| H  | 0.302269  | 3.868684  | -0.532101 |
| C  | 0.674157  | 1.710779  | 1.136208  |
| H  | 0.214039  | 2.658155  | 1.433777  |
| H  | 0.687823  | 1.093870  | 2.039543  |
| C  | 0.764084  | 0.106875  | -0.827389 |
| H  | 1.136932  | 0.677484  | -1.684968 |
| H  | 0.219312  | -0.737671 | -1.253542 |
| C  | 2.130770  | 1.960047  | 0.723291  |
| H  | 2.170329  | 2.587733  | -0.170970 |
| H  | 2.651187  | 2.515449  | 1.508900  |
| C  | 1.965261  | -0.432231 | -0.042485 |
| H  | 1.632368  | -0.982741 | 0.829257  |
| C  | 2.941790  | 0.676853  | 0.407547  |
| Cl | 3.734994  | 0.085066  | 1.983499  |
| C  | 4.074602  | 1.001334  | -0.563939 |
| H  | 4.643258  | 1.859991  | -0.194584 |
| H  | 3.656303  | 1.257742  | -1.545089 |
| H  | 4.748939  | 0.154358  | -0.691080 |
| Br | 2.845933  | -1.865310 | -1.116378 |

SCF Energy (PCM/mPW1PW91/6-31+G\*\*) =  
-6264.55892973

Number of imaginary frequencies = 0

## 1m\_C007

## B3LYP/6-31G\* Geometry

|    |           |           |           |
|----|-----------|-----------|-----------|
| C  | -1.372691 | 0.090260  | 0.754065  |
| C  | -3.081123 | 0.838370  | -1.069222 |
| C  | -0.236416 | 1.039720  | 0.112554  |
| C  | -2.338067 | -0.307691 | -0.397597 |
| H  | -3.494599 | 0.457976  | -2.016181 |
| H  | -1.776367 | -0.831147 | -1.171750 |
| C  | -2.112859 | 1.950263  | -1.353259 |
| H  | -2.477891 | 2.717469  | -2.037701 |
| C  | -0.891602 | 2.093346  | -0.820829 |
| O  | -4.157842 | 1.290130  | -0.241197 |
| H  | -4.576825 | 2.037571  | -0.695996 |
| Br | -3.684423 | -1.693876 | 0.128117  |
| C  | -2.137504 | 0.823381  | 1.879538  |
| H  | -3.052916 | 0.272634  | 2.110694  |
| H  | -2.431225 | 1.836051  | 1.596545  |
| H  | -1.535292 | 0.868658  | 2.793122  |
| C  | -0.806404 | -1.215853 | 1.356536  |
| H  | -1.608102 | -1.752716 | 1.867533  |
| H  | -0.025147 | -1.023595 | 2.092285  |
| H  | -0.413303 | -1.895072 | 0.592957  |
| C  | -0.102888 | 3.330166  | -1.212347 |
| H  | -0.057002 | 4.062296  | -0.396792 |
| H  | -0.574552 | 3.825117  | -2.066042 |
| H  | 0.931749  | 3.105251  | -1.497508 |
| C  | 0.598873  | 1.796467  | 1.197779  |
| H  | 1.050339  | 2.672108  | 0.728036  |
| H  | -0.058485 | 2.195338  | 1.974403  |
| C  | 0.774574  | 0.255622  | -0.805578 |
| H  | 1.211352  | 0.958464  | -1.521197 |
| H  | 0.243963  | -0.480769 | -1.415129 |
| C  | 1.748559  | 1.021853  | 1.866575  |
| H  | 2.296446  | 1.703772  | 2.526964  |
| H  | 1.378079  | 0.215327  | 2.502038  |
| C  | 1.940705  | -0.465126 | -0.106464 |
| H  | 1.604980  | -1.338896 | 0.442875  |
| C  | 2.743744  | 0.435255  | 0.842805  |
| Cl | 3.917556  | -0.630019 | 1.798043  |
| C  | 3.585594  | 1.508137  | 0.153036  |
| H  | 4.122309  | 2.099586  | 0.899746  |
| H  | 2.950710  | 2.184966  | -0.428502 |
| H  | 4.307789  | 1.052873  | -0.526589 |
| Br | 3.077946  | -1.269524 | -1.538875 |

SCF Energy (PCM/mPW1PW91/6-31+G\*\*) =  
-6264.55958942

Number of imaginary frequencies = 0

## 1m\_C008

## B3LYP/6-31G\* Geometry

|    |          |          |          |
|----|----------|----------|----------|
| C  | -1.42910 | 0.21968  | 1.28309  |
| C  | -3.03825 | -1.58141 | 0.43652  |
| C  | -0.24167 | -0.22943 | 0.28027  |
| C  | -2.84264 | -0.09573 | 0.73969  |
| H  | -3.14318 | -2.08234 | 1.40919  |
| H  | -3.59515 | 0.25481  | 1.44726  |
| C  | -1.83901 | -2.13401 | -0.27672 |
| H  | -2.02669 | -3.08889 | -0.76486 |
| C  | -0.60678 | -1.60284 | -0.33902 |
| O  | -4.25730 | -1.88608 | -0.21871 |
| H  | -4.27633 | -1.35281 | -1.03344 |
| Br | -3.35734 | 0.96213  | -0.90065 |
| C  | -1.38692 | 1.71111  | 1.68083  |
| H  | -2.06972 | 1.87654  | 2.52290  |
| H  | -1.71130 | 2.36593  | 0.86963  |
| H  | -0.39060 | 2.02993  | 1.99717  |
| C  | -1.34926 | -0.60047 | 2.61198  |
| H  | -2.28669 | -0.50457 | 3.17136  |
| H  | -0.55886 | -0.22069 | 3.26381  |
| H  | -1.16261 | -1.66331 | 2.43771  |
| C  | 0.42464  | -2.37501 | -1.13036 |
| H  | -0.02010 | -3.29117 | -1.52991 |
| H  | 1.29084  | -2.65648 | -0.52825 |
| H  | 0.80894  | -1.80223 | -1.98171 |
| C  | -0.05114 | 0.80278  | -0.89140 |
| H  | -0.73539 | 0.55019  | -1.70308 |
| H  | -0.34732 | 1.79462  | -0.54912 |
| C  | 1.06917  | -0.27485 | 1.16806  |
| H  | 1.16929  | -1.25229 | 1.64591  |
| H  | 0.92125  | 0.43769  | 1.98258  |
| C  | 1.36228  | 0.94509  | -1.47627 |
| H  | 1.67808  | 0.03306  | -1.99695 |
| H  | 1.35213  | 1.74486  | -2.22526 |
| C  | 2.45730  | 0.13542  | 0.62792  |
| H  | 3.07292  | 0.45382  | 1.46756  |
| C  | 2.45483  | 1.22873  | -0.45148 |
| Cl | 2.01914  | 2.79559  | 0.48899  |
| C  | 3.80946  | 1.51729  | -1.09439 |
| H  | 3.73598  | 2.41270  | -1.71748 |
| H  | 4.11487  | 0.67494  | -1.72017 |
| H  | 4.58143  | 1.68147  | -0.33699 |
| Br | 3.54516  | -1.44299 | -0.00516 |

SCF Energy (PCM/mPW1PW91/6-31+G\*\*) =  
-6264.55416994

Number of imaginary frequencies = 0

## 1m\_C009

## B3LYP/6-31G\* Geometry

|    |           |           |           |
|----|-----------|-----------|-----------|
| C  | 1.127053  | -0.499007 | -1.049916 |
| C  | 3.210793  | -1.552532 | 0.014132  |
| C  | 0.401032  | -0.314644 | 0.381074  |
| C  | 2.667933  | -0.475935 | -0.922641 |
| H  | 3.063528  | -2.516522 | -0.492060 |
| H  | 3.129578  | -0.551687 | -1.908071 |
| C  | 2.451330  | -1.520516 | 1.308815  |
| H  | 2.982511  | -1.964407 | 2.148787  |
| C  | 1.244271  | -0.969978 | 1.504919  |
| O  | 4.613419  | -1.488896 | 0.205063  |
| H  | 4.808755  | -0.592382 | 0.532347  |
| Br | 3.377792  | 1.304631  | -0.286147 |
| C  | 0.741526  | 0.545753  | -2.125036 |
| H  | 1.154359  | 0.227087  | -3.089678 |
| H  | 1.151024  | 1.535260  | -1.914434 |
| H  | -0.337969 | 0.642694  | -2.255797 |
| C  | 0.805735  | -1.892361 | -1.671406 |
| H  | 1.489408  | -2.099367 | -2.502638 |
| H  | -0.207148 | -1.909382 | -2.084659 |
| H  | 0.892848  | -2.711301 | -0.952045 |
| C  | 0.721136  | -0.936990 | 2.929513  |
| H  | 1.438512  | -1.415495 | 3.601937  |
| H  | -0.236824 | -1.452927 | 3.060658  |
| H  | 0.582656  | 0.091411  | 3.284850  |
| C  | 0.162887  | 1.203479  | 0.741687  |
| H  | 0.981557  | 1.570468  | 1.365349  |
| H  | 0.186632  | 1.814725  | -0.161049 |
| C  | -1.011141 | -1.012491 | 0.393032  |
| H  | -1.305654 | -1.226476 | 1.422457  |
| H  | -0.976852 | -1.980268 | -0.102309 |
| C  | -1.174219 | 1.473521  | 1.440912  |
| H  | -1.241861 | 0.904180  | 2.374794  |
| H  | -1.241380 | 2.529818  | 1.719112  |
| C  | -2.120401 | -0.162542 | -0.230825 |
| H  | -1.877460 | 0.116932  | -1.249363 |
| C  | -2.423775 | 1.110458  | 0.606070  |
| Cl | -2.731445 | 2.495436  | -0.600742 |
| C  | -3.649643 | 1.039928  | 1.514242  |
| H  | -3.708498 | 1.947930  | 2.121635  |
| H  | -3.565165 | 0.175733  | 2.183516  |
| H  | -4.569926 | 0.934781  | 0.939072  |
| Br | 1.127053  | -0.499007 | -1.049916 |

SCF Energy (PCM/mPW1PW91/6-31+G\*\*) =  
-6264.55845564

Number of imaginary frequencies = 0

## 1m\_C010

## B3LYP/6-31G\* Geometry

|    |           |           |           |
|----|-----------|-----------|-----------|
| C  | 1.169353  | -0.183227 | -1.085528 |
| C  | 3.255541  | -1.460832 | -0.332241 |
| C  | 0.422133  | -0.415140 | 0.321039  |
| C  | 2.720444  | -0.180599 | -0.951044 |
| H  | 3.091634  | -2.251468 | -1.086462 |
| H  | 3.161289  | -0.032484 | -1.937632 |
| C  | 2.484840  | -1.805538 | 0.906708  |
| H  | 2.987372  | -2.491006 | 1.590003  |
| C  | 1.241345  | -1.400907 | 1.199207  |
| O  | 4.655975  | -1.338489 | -0.113790 |
| H  | 4.974310  | -2.195778 | 0.209865  |
| Br | 3.462720  | 1.391169  | 0.046434  |
| C  | 0.792427  | 1.114737  | -1.835749 |
| H  | 1.330240  | 1.135513  | -2.791463 |
| H  | 1.082451  | 2.012346  | -1.287952 |
| H  | -0.272449 | 1.168358  | -2.071248 |
| C  | 0.851235  | -1.351418 | -2.065569 |
| H  | 1.525729  | -1.314913 | -2.928730 |
| H  | -0.166764 | -1.264702 | -2.456790 |
| H  | 0.949055  | -2.336981 | -1.601572 |
| C  | 0.612289  | -1.961767 | 2.464636  |
| H  | 1.385897  | -2.381922 | 3.113741  |
| H  | -0.097885 | -2.768808 | 2.244290  |
| H  | 0.069125  | -1.212755 | 3.050392  |
| C  | 0.210309  | 0.895182  | 1.159410  |
| H  | 0.048144  | 0.602368  | 2.201379  |
| H  | 1.127710  | 1.483889  | 1.161770  |
| C  | -0.999755 | -1.057278 | 0.144544  |
| H  | -1.322777 | -1.446423 | 1.111715  |
| H  | -0.962916 | -1.922818 | -0.517508 |
| C  | -0.963081 | 1.804941  | 0.741838  |
| H  | -1.073333 | 2.600582  | 1.487813  |
| H  | -0.754174 | 2.302751  | -0.204708 |
| C  | -2.106776 | -0.113669 | -0.336430 |
| H  | -1.928802 | 0.257177  | -1.343326 |
| C  | -2.315587 | 1.071618  | 0.617511  |
| Cl | -3.494422 | 2.257560  | -0.179001 |
| C  | -2.912998 | 0.705079  | 1.976120  |
| H  | -3.056529 | 1.610283  | 2.571935  |
| H  | -2.240884 | 0.038837  | 2.527474  |
| H  | -3.873847 | 0.201248  | 1.857171  |
| Br | -3.765450 | -1.203483 | -0.574821 |

SCF Energy (PCM/mPW1PW91/6-31+G\*\*) =  
-6264.55869850

Number of imaginary frequencies = 0

## 1m\_C011

## B3LYP/6-31G\* Geometry

|    |           |           |           |
|----|-----------|-----------|-----------|
| C  | -1.435949 | 0.254598  | 1.271461  |
| C  | -3.021212 | -1.567091 | 0.486749  |
| C  | -0.253638 | -0.188912 | 0.257549  |
| C  | -2.853905 | -0.075974 | 0.737260  |
| H  | -3.059549 | -2.041724 | 1.482770  |
| H  | -3.598610 | 0.271543  | 1.454868  |
| C  | -1.846231 | -2.100589 | -0.279586 |
| H  | -2.031180 | -3.042167 | -0.797995 |
| C  | -0.631210 | -1.542108 | -0.394241 |
| O  | -4.263432 | -1.808863 | -0.165839 |
| H  | -4.354740 | -2.769690 | -0.263397 |
| Br | -3.373184 | 0.947008  | -0.900023 |
| C  | -1.399920 | 1.751387  | 1.647382  |
| H  | -2.067613 | 1.923310  | 2.500328  |
| H  | -1.747147 | 2.388292  | 0.831734  |
| H  | -0.399437 | 2.081277  | 1.940627  |
| C  | -1.332991 | -0.541518 | 2.613631  |
| H  | -2.273637 | -0.459314 | 3.169642  |
| H  | -0.554497 | -0.131464 | 3.261499  |
| H  | -1.119130 | -1.602780 | 2.460756  |
| C  | 0.346667  | -2.233860 | -1.318958 |
| H  | -0.020371 | -3.230775 | -1.581579 |
| H  | 1.343431  | -2.342776 | -0.891244 |
| H  | 0.459964  | -1.678988 | -2.259301 |
| C  | -0.037224 | 0.860111  | -0.891454 |
| H  | -0.738284 | 0.651660  | -1.701352 |
| H  | -0.292153 | 1.855233  | -0.527108 |
| C  | 1.053958  | -0.268001 | 1.150408  |
| H  | 1.130471  | -1.249671 | 1.623572  |
| H  | 0.912835  | 0.445330  | 1.965198  |
| C  | 1.378604  | 0.953765  | -1.481270 |
| H  | 1.661958  | 0.031465  | -2.002489 |
| H  | 1.393716  | 1.753300  | -2.230456 |
| C  | 2.455023  | 0.117241  | 0.627129  |
| H  | 3.062763  | 0.435795  | 1.472105  |
| C  | 2.484879  | 1.201873  | -0.461667 |
| Cl | 2.105350  | 2.786522  | 0.474629  |
| C  | 3.845222  | 1.439669  | -1.112174 |
| H  | 3.799436  | 2.331975  | -1.742336 |
| H  | 4.117037  | 0.581746  | -1.732507 |
| H  | 4.626614  | 1.582217  | -0.360153 |
| Br | 3.531818  | -1.491217 | 0.044923  |

SCF Energy (PCM/mPW1PW91/6-31+G\*\*) =  
-6264.56334019

Number of imaginary frequencies = 0

## 1n\_C001

## B3LYP/6-31G\* Geometry

|    |           |           |           |
|----|-----------|-----------|-----------|
| C  | 1.480490  | 0.451870  | -0.849249 |
| C  | 2.825451  | 0.631953  | 1.339504  |
| C  | 0.140217  | 0.938072  | -0.089614 |
| C  | 2.342584  | -0.264835 | 0.209825  |
| H  | 3.616547  | 1.295669  | 0.952206  |
| H  | 1.819140  | -1.123118 | 0.630124  |
| C  | 1.695300  | 1.484940  | 1.832884  |
| H  | 1.908967  | 2.002094  | 2.766564  |
| C  | 0.527100  | 1.690145  | 1.207866  |
| O  | 3.330530  | -0.117948 | 2.437171  |
| H  | 4.081199  | -0.631702 | 2.090813  |
| Br | 3.992403  | -1.137353 | -0.567089 |
| C  | 2.237698  | 1.668287  | -1.433125 |
| H  | 3.243947  | 1.359530  | -1.733616 |
| H  | 2.331161  | 2.488967  | -0.715827 |
| H  | 1.731528  | 2.052770  | -2.323213 |
| C  | 1.192699  | -0.528746 | -2.010639 |
| H  | 2.082926  | -0.617788 | -2.638529 |
| H  | 0.370734  | -0.189982 | -2.646856 |
| H  | 0.952832  | -1.536852 | -1.660272 |
| C  | -0.425234 | 2.691652  | 1.830470  |
| H  | 0.009056  | 3.104989  | 2.745191  |
| H  | -1.392984 | 2.255023  | 2.101658  |
| H  | -0.631003 | 3.533105  | 1.157926  |
| C  | -0.671446 | 1.847498  | -1.067483 |
| H  | -0.224037 | 2.846668  | -1.097218 |
| H  | -0.574481 | 1.444892  | -2.077860 |
| C  | -0.720799 | -0.324130 | 0.284137  |
| H  | -0.291433 | -0.819375 | 1.158329  |
| H  | -0.694704 | -1.040349 | -0.538133 |
| C  | -2.177698 | 2.003102  | -0.794598 |
| H  | -2.358671 | 2.641199  | 0.076668  |
| H  | -2.640782 | 2.512553  | -1.647055 |
| C  | -2.195602 | -0.052505 | 0.575238  |
| H  | -2.326826 | 0.527933  | 1.489807  |
| C  | -2.939757 | 0.690211  | -0.540974 |
| Cl | -2.899237 | -0.310094 | -2.100580 |
| C  | -4.408849 | 0.956395  | -0.220375 |
| H  | -4.957126 | 0.022144  | -0.087480 |
| H  | -4.874744 | 1.532493  | -1.024740 |
| H  | -4.482167 | 1.536104  | 0.708536  |
| Br | -3.062952 | -1.785082 | 1.049440  |

SCF Energy (PCM/mPW1PW91/6-31+G\*\*) =  
-6264.57154775

Number of imaginary frequencies = 0

## 1n\_C002

## B3LYP/6-31G\* Geometry

|    |           |           |           |
|----|-----------|-----------|-----------|
| C  | 1.499323  | 0.532715  | -0.799916 |
| C  | 2.800353  | 0.458274  | 1.430358  |
| C  | 0.146751  | 0.943658  | -0.019381 |
| C  | 2.356873  | -0.301903 | 0.183786  |
| H  | 3.651007  | 1.100251  | 1.173635  |
| H  | 1.816514  | -1.203907 | 0.477271  |
| C  | 1.681069  | 1.313493  | 1.954523  |
| H  | 1.896339  | 1.767761  | 2.921089  |
| C  | 0.518933  | 1.582720  | 1.340318  |
| O  | 3.315637  | -0.400899 | 2.444363  |
| H  | 2.574295  | -0.930431 | 2.781469  |
| Br | 3.998618  | -1.067132 | -0.673713 |
| C  | 2.266230  | 1.800808  | -1.243127 |
| H  | 3.271890  | 1.520691  | -1.571111 |
| H  | 2.360250  | 2.536237  | -0.438711 |
| H  | 1.766868  | 2.284868  | -2.087557 |
| C  | 1.224719  | -0.319633 | -2.061978 |
| H  | 2.127769  | -0.361203 | -2.675150 |
| H  | 0.423388  | 0.096353  | -2.677566 |
| H  | 0.962107  | -1.354221 | -1.822062 |
| C  | -0.422810 | 2.549801  | 2.030162  |
| H  | 0.013043  | 2.890722  | 2.973643  |
| H  | -1.398969 | 2.110353  | 2.265519  |
| H  | -0.612780 | 3.440119  | 1.418765  |
| C  | -0.664808 | 1.931044  | -0.918944 |
| H  | -0.217526 | 2.929249  | -0.866487 |
| H  | -0.568589 | 1.613581  | -1.959130 |
| C  | -0.712101 | -0.347602 | 0.234694  |
| H  | -0.281477 | -0.923205 | 1.057632  |
| H  | -0.687234 | -0.984655 | -0.650566 |
| C  | -2.171026 | 2.062688  | -0.634329 |
| H  | -2.352767 | 2.625927  | 0.286806  |
| H  | -2.634534 | 2.640392  | -1.441775 |
| C  | -2.184955 | -0.101540 | 0.556147  |
| H  | -2.310035 | 0.401915  | 1.516113  |
| C  | -2.932990 | 0.732539  | -0.490849 |
| Cl | -2.896981 | -0.132386 | -2.128478 |
| C  | -4.400649 | 0.971059  | -0.143021 |
| H  | -4.947561 | 0.028605  | -0.081339 |
| H  | -4.871081 | 1.607929  | -0.897349 |
| H  | -4.469407 | 1.476412  | 0.828761  |
| Br | -3.050544 | -1.867289 | 0.890474  |

SCF Energy (PCM/mPW1PW91/6-31+G\*\*) =  
-6264.56928023

Number of imaginary frequencies = 0

## 1n\_C003

## B3LYP/6-31G\* Geometry

|    |           |           |           |
|----|-----------|-----------|-----------|
| C  | 1.480410  | 0.450955  | -0.849447 |
| C  | 2.825653  | 0.633266  | 1.338856  |
| C  | 0.140247  | 0.937910  | -0.090269 |
| C  | 2.342599  | -0.264639 | 0.210146  |
| H  | 3.616727  | 1.296586  | 0.950855  |
| H  | 1.819313  | -1.122536 | 0.631427  |
| C  | 1.695540  | 1.486633  | 1.831652  |
| H  | 1.909296  | 2.004561  | 2.764880  |
| C  | 0.527204  | 1.691068  | 1.206628  |
| O  | 3.330811  | -0.115641 | 2.437237  |
| H  | 4.081534  | -0.629586 | 2.091267  |
| Br | 3.992283  | -1.137929 | -0.566248 |
| C  | 2.237561  | 1.666868  | -1.434607 |
| H  | 3.243672  | 1.357799  | -1.735230 |
| H  | 2.331420  | 2.488234  | -0.718143 |
| H  | 1.731106  | 2.050631  | -2.324853 |
| C  | 1.192774  | -0.530639 | -2.010040 |
| H  | 2.083214  | -0.620508 | -2.637513 |
| H  | 0.371172  | -0.192125 | -2.646820 |
| H  | 0.952489  | -1.538396 | -1.658934 |
| C  | -0.425203 | 2.692950  | 1.828462  |
| H  | 0.009168  | 3.107227  | 2.742728  |
| H  | -1.392787 | 2.256296  | 2.100248  |
| H  | -0.631290 | 3.533711  | 1.155203  |
| C  | -0.671313 | 1.846800  | -1.068749 |
| H  | -0.223884 | 2.845955  | -1.098925 |
| H  | -0.574295 | 1.443773  | -2.078940 |
| C  | -0.720861 | -0.323896 | 0.284754  |
| H  | -0.291590 | -0.818032 | 1.159631  |
| H  | -0.694648 | -1.041241 | -0.536531 |
| C  | -2.177588 | 2.002548  | -0.796067 |
| H  | -2.358620 | 2.641264  | 0.074725  |
| H  | -2.640651 | 2.511383  | -1.648905 |
| C  | -2.195751 | -0.052035 | 0.575313  |
| H  | -2.327119 | 0.529117  | 1.489423  |
| C  | -2.939668 | 0.689895  | -0.541507 |
| Cl | -2.898976 | -0.311724 | -2.100414 |
| C  | -4.408803 | 0.956337  | -0.221380 |
| H  | -4.957089 | 0.022221  | -0.087559 |
| H  | -4.874634 | 1.531579  | -1.026394 |
| H  | -4.482205 | 1.537036  | 0.706916  |
| Br | -3.063169 | -1.784203 | 1.050766  |

SCF Energy (PCM/mPW1PW91/6-31+G\*\*) =  
-6264.57154775

Number of imaginary frequencies = 0

## 1n\_C004

## B3LYP/6-31G\* Geometry

|    |          |          |          |
|----|----------|----------|----------|
| C  | -1.42360 | 0.38518  | -1.07404 |
| C  | -3.28042 | 1.31602  | 0.50996  |
| C  | -0.37172 | 0.36611  | 0.13783  |
| C  | -2.89104 | 0.30457  | -0.58549 |
| H  | -4.05406 | 0.86479  | 1.14485  |
| H  | -3.54997 | 0.44492  | -1.44301 |
| C  | -2.12174 | 1.72993  | 1.35948  |
| H  | -2.38760 | 2.44430  | 2.13620  |
| C  | -0.83819 | 1.37007  | 1.21603  |
| O  | -3.80135 | 2.52077  | -0.07617 |
| H  | -4.70831 | 2.33549  | -0.36890 |
| Br | -3.48466 | -1.52635 | 0.03295  |
| C  | -1.19110 | -0.72310 | -2.12590 |
| H  | -1.86410 | -0.55313 | -2.97480 |
| H  | -1.40406 | -1.72265 | -1.74515 |
| H  | -0.17020 | -0.71315 | -2.51651 |
| C  | -1.32887 | 1.74192  | -1.83760 |
| H  | -2.13799 | 1.81618  | -2.57155 |
| H  | -0.38716 | 1.80288  | -2.39020 |
| H  | -1.40821 | 2.60592  | -1.17610 |
| C  | 0.15992  | 2.00751  | 2.16304  |
| H  | -0.35406 | 2.68116  | 2.85464  |
| H  | 0.90620  | 2.60504  | 1.62516  |
| H  | 0.70581  | 1.27674  | 2.77013  |
| C  | -0.25905 | -1.06637 | 0.76353  |
| H  | -1.12739 | -1.25579 | 1.39664  |
| H  | -0.29736 | -1.80520 | -0.03866 |
| C  | 1.02754  | 0.77320  | -0.44913 |
| H  | 1.06665  | 1.85208  | -0.61856 |
| H  | 1.15176  | 0.30506  | -1.42711 |
| C  | 1.01097  | -1.35868 | 1.57200  |
| H  | 1.03593  | -0.77423 | 2.50067  |
| H  | 1.00474  | -2.41193 | 1.87466  |
| C  | 2.26012  | 0.38905  | 0.37497  |
| H  | 2.34469  | 0.99153  | 1.27796  |
| C  | 2.32541  | -1.07278 | 0.82293  |
| Cl | 2.40759  | -2.18762 | -0.65377 |
| C  | 3.54483  | -1.38699 | 1.68630  |
| H  | 4.47133  | -1.20047 | 1.14016  |
| H  | 3.52375  | -2.43232 | 2.00665  |
| H  | 3.53528  | -0.75095 | 2.58073  |
| Br | 3.88031  | 0.95387  | -0.64775 |

SCF Energy (PCM/mPW1PW91/6-31+G\*\*) =  
-6264.56268033

Number of imaginary frequencies = 0

## 1n\_C005

## B3LYP/6-31G\* Geometry

|    |           |           |           |
|----|-----------|-----------|-----------|
| C  | -1.428027 | 0.383152  | -1.072330 |
| C  | -3.286198 | 1.310653  | 0.502849  |
| C  | -0.374922 | 0.362338  | 0.138863  |
| C  | -2.897957 | 0.303960  | -0.586538 |
| H  | -4.076658 | 0.873015  | 1.126346  |
| H  | -3.561734 | 0.456595  | -1.436741 |
| C  | -2.128619 | 1.713681  | 1.364870  |
| H  | -2.389959 | 2.401350  | 2.171501  |
| C  | -0.842185 | 1.361934  | 1.221223  |
| O  | -3.831656 | 2.449323  | -0.193808 |
| H  | -3.867139 | 3.188500  | 0.434261  |
| Br | -3.487373 | -1.520078 | 0.034201  |
| C  | -1.197555 | -0.726251 | -2.123578 |
| H  | -1.866245 | -0.551062 | -2.974628 |
| H  | -1.419058 | -1.724488 | -1.744314 |
| H  | -0.174907 | -0.722654 | -2.509820 |
| C  | -1.325173 | 1.737822  | -1.837778 |
| H  | -2.141925 | 1.823177  | -2.561063 |
| H  | -0.387579 | 1.788527  | -2.398479 |
| H  | -1.388316 | 2.601878  | -1.174715 |
| C  | 0.154090  | 1.992759  | 2.174160  |
| H  | -0.359282 | 2.660979  | 2.871953  |
| H  | 0.900979  | 2.593713  | 1.640949  |
| H  | 0.699575  | 1.257287  | 2.775445  |
| C  | -0.260281 | -1.071307 | 0.762385  |
| H  | -1.128486 | -1.263626 | 1.394735  |
| H  | -0.299554 | -1.806708 | -0.042808 |
| C  | 1.024260  | 0.772097  | -0.446198 |
| H  | 1.062951  | 1.851306  | -0.613898 |
| H  | 1.148131  | 0.306216  | -1.425244 |
| C  | 1.010840  | -1.366786 | 1.567986  |
| H  | 1.037188  | -0.787379 | 2.499857  |
| H  | 1.005094  | -2.421480 | 1.865499  |
| C  | 2.257397  | 0.386474  | 0.376619  |
| H  | 2.341715  | 0.985298  | 1.282099  |
| C  | 2.324515  | -1.077107 | 0.818814  |
| Cl | 2.406595  | -2.185731 | -0.661726 |
| C  | 3.544827  | -1.393282 | 1.680292  |
| H  | 4.470829  | -1.204304 | 1.134149  |
| H  | 3.524746  | -2.439750 | 1.996956  |
| H  | 3.535613  | -0.760484 | 2.577046  |
| Br | 3.876661  | 0.957680  | -0.643890 |

SCF Energy (PCM/mPW1PW91/6-31+G\*\*) =  
-6264.56155160

Number of imaginary frequencies = 0

## 1n\_C006

## B3LYP/6-31G\* Geometry

|    |           |           |           |
|----|-----------|-----------|-----------|
| C  | -1.426404 | 0.382519  | -1.074015 |
| C  | -3.291289 | 1.324558  | 0.493056  |
| C  | -0.379555 | 0.351908  | 0.142204  |
| C  | -2.898850 | 0.309510  | -0.595072 |
| H  | -4.103653 | 0.898942  | 1.087775  |
| H  | -3.562019 | 0.453854  | -1.447335 |
| C  | -2.141528 | 1.698366  | 1.376568  |
| H  | -2.409480 | 2.388373  | 2.175606  |
| C  | -0.854931 | 1.339692  | 1.233672  |
| O  | -3.875202 | 2.499197  | -0.092530 |
| H  | -3.150212 | 3.075778  | -0.379250 |
| Br | -3.486959 | -1.515768 | 0.033550  |
| C  | -1.197565 | -0.719468 | -2.133203 |
| H  | -1.844854 | -0.521670 | -2.996063 |
| H  | -1.451231 | -1.714522 | -1.766253 |
| H  | -0.166870 | -0.736990 | -2.497247 |
| C  | -1.303240 | 1.741068  | -1.832898 |
| H  | -2.160821 | 1.889840  | -2.497122 |
| H  | -0.406367 | 1.750319  | -2.458415 |
| H  | -1.237690 | 2.599170  | -1.157347 |
| C  | 0.138292  | 1.954025  | 2.201085  |
| H  | -0.377574 | 2.615328  | 2.903238  |
| H  | 0.893607  | 2.557645  | 1.682607  |
| H  | 0.674607  | 1.207434  | 2.796976  |
| C  | -0.262000 | -1.089091 | 0.748015  |
| H  | -1.129197 | -1.290308 | 1.378609  |
| H  | -0.300447 | -1.814668 | -0.066247 |
| C  | 1.020204  | 0.771790  | -0.435399 |
| H  | 1.057957  | 1.853006  | -0.591315 |
| H  | 1.147810  | 0.316151  | -1.418942 |
| C  | 1.010035  | -1.392212 | 1.549578  |
| H  | 1.034286  | -0.825927 | 2.489379  |
| H  | 1.006131  | -2.450940 | 1.832235  |
| C  | 2.253210  | 0.380344  | 0.384713  |
| H  | 2.332721  | 0.966659  | 1.298722  |
| C  | 2.323830  | -1.089138 | 0.806114  |
| Cl | 2.410546  | -2.176153 | -0.690225 |
| C  | 3.543982  | -1.414204 | 1.664451  |
| H  | 4.470122  | -1.214695 | 1.122302  |
| H  | 3.526526  | -2.465199 | 1.965802  |
| H  | 3.531720  | -0.794570 | 2.570259  |
| Br | 3.871020  | 0.971769  | -0.625753 |

SCF Energy (PCM/mPW1PW91/6-31+G\*\*) =  
-6264.56318040

Number of imaginary frequencies = 0

**1o\_C001****B3LYP/6-31G\* Geometry**

|    |           |           |           |
|----|-----------|-----------|-----------|
| C  | -1.365152 | 0.211813  | 0.884448  |
| C  | -2.978432 | 1.021492  | -0.959707 |
| C  | -0.132074 | 0.998174  | 0.203339  |
| C  | -2.338811 | -0.166853 | -0.258132 |
| H  | -3.696720 | 1.500862  | -0.274157 |
| H  | -1.858208 | -0.800768 | -1.002952 |
| C  | -1.906846 | 2.002116  | -1.324485 |
| H  | -2.208359 | 2.733089  | -2.072257 |
| C  | -0.672521 | 2.046155  | -0.806846 |
| O  | -3.644769 | 0.639680  | -2.155914 |
| H  | -4.341512 | 0.013823  | -1.891430 |
| Br | -3.864963 | -1.349168 | 0.350852  |
| C  | -2.091940 | 1.111875  | 1.911711  |
| H  | -3.070116 | 0.680401  | 2.146016  |
| H  | -2.244930 | 2.129350  | 1.539813  |
| H  | -1.531213 | 1.173732  | 2.849123  |
| C  | -0.944105 | -1.082371 | 1.613216  |
| H  | -1.805998 | -1.504086 | 2.135938  |
| H  | -0.173496 | -0.892681 | 2.362286  |
| H  | -0.587624 | -1.852428 | 0.921669  |
| C  | 0.253680  | 3.149428  | -1.285981 |
| H  | -0.139589 | 3.597741  | -2.202833 |
| H  | 1.268035  | 2.792783  | -1.496140 |
| H  | 0.348221  | 3.954331  | -0.546034 |
| C  | 0.759113  | 1.741917  | 1.253533  |
| H  | 1.288411  | 2.541764  | 0.735113  |
| H  | 0.134724  | 2.238370  | 2.000658  |
| C  | 0.795640  | 0.050670  | -0.647859 |
| H  | 1.298587  | 0.649736  | -1.410839 |
| H  | 0.192698  | -0.677145 | -1.196708 |
| C  | 1.845823  | 0.925912  | 1.968040  |
| H  | 2.457947  | 1.604874  | 2.572387  |
| H  | 1.419290  | 0.196814  | 2.666652  |
| C  | 1.886061  | -0.708453 | 0.113829  |
| H  | 1.464616  | -1.486544 | 0.748024  |
| C  | 2.778000  | 0.148498  | 1.017788  |
| Cl | 3.718104  | 1.379784  | -0.000984 |
| C  | 3.811001  | -0.667751 | 1.791424  |
| H  | 3.298295  | -1.414149 | 2.411406  |
| H  | 4.396978  | -0.017621 | 2.446935  |
| H  | 4.486264  | -1.189560 | 1.110923  |
| Br | -1.365152 | 0.211813  | 0.884448  |

SCF Energy (PCM/mPW1PW91/6-31+G\*\*) =  
-6264.56931482

Number of imaginary frequencies = 0

**1o\_C002****B3LYP/6-31G\* Geometry**

|    |           |           |           |
|----|-----------|-----------|-----------|
| C  | -1.417935 | 0.138513  | 0.920305  |
| C  | -2.938273 | 1.152091  | -0.895619 |
| C  | -0.151288 | 0.946228  | 0.346120  |
| C  | -2.359321 | -0.114117 | -0.278787 |
| H  | -3.681654 | 1.579609  | -0.202856 |
| H  | -1.870389 | -0.695922 | -1.059890 |
| C  | -1.838365 | 2.147267  | -1.112377 |
| H  | -2.103511 | 2.963704  | -1.781169 |
| C  | -0.622629 | 2.110458  | -0.550818 |
| O  | -3.551660 | 0.898437  | -2.152787 |
| H  | -4.276270 | 0.271804  | -1.981154 |
| Br | -3.936196 | -1.293281 | 0.179942  |
| C  | -2.150246 | 0.968954  | 2.000996  |
| H  | -3.118314 | 0.508870  | 2.222642  |
| H  | -2.325572 | 2.000839  | 1.683228  |
| H  | -1.578379 | 0.996984  | 2.932767  |
| C  | -1.015046 | -1.213826 | 1.546369  |
| H  | -1.900204 | -1.705670 | 1.956667  |
| H  | -0.309125 | -1.084033 | 2.372916  |
| H  | -0.574496 | -1.901758 | 0.817543  |
| C  | 0.344433  | 3.231045  | -0.869413 |
| H  | 1.283905  | 2.863690  | -1.299205 |
| H  | 0.604994  | 3.815183  | 0.022006  |
| H  | -0.100546 | 3.920991  | -1.592046 |
| C  | 0.702308  | 1.462684  | 1.555468  |
| H  | 0.280172  | 2.399432  | 1.934045  |
| H  | 0.613771  | 0.749898  | 2.381067  |
| C  | 0.762452  | 0.023756  | -0.547197 |
| H  | 1.173963  | 0.595817  | -1.383807 |
| H  | 0.175700  | -0.778846 | -0.996632 |
| C  | 2.204070  | 1.690524  | 1.286210  |
| H  | 2.341486  | 2.542492  | 0.623433  |
| H  | 2.684179  | 1.962496  | 2.233398  |
| C  | 1.928369  | -0.577135 | 0.233425  |
| H  | 1.573120  | -1.080609 | 1.131998  |
| C  | 2.964578  | 0.462461  | 0.688184  |
| Cl | 3.935732  | 1.061200  | -0.775234 |
| C  | 3.970578  | -0.128805 | 1.674296  |
| H  | 3.442170  | -0.447841 | 2.582463  |
| H  | 4.716768  | 0.618953  | 1.955966  |
| H  | 4.477810  | -0.995784 | 1.245128  |
| Br | 2.726886  | -2.081827 | -0.790805 |

SCF Energy (PCM/mPW1PW91/6-31+G\*\*) =  
-6264.56534231

Number of imaginary frequencies = 0

## 1o\_C003

## B3LYP/6-31G\* Geometry

|    |           |           |           |
|----|-----------|-----------|-----------|
| C  | -1.377137 | 0.218450  | 0.884018  |
| C  | -2.976065 | 1.003490  | -0.987841 |
| C  | -0.138564 | 0.999607  | 0.211331  |
| C  | -2.353388 | -0.182155 | -0.257806 |
| H  | -3.747612 | 1.455311  | -0.353770 |
| H  | -1.849405 | -0.826691 | -0.980762 |
| C  | -1.910313 | 2.011579  | -1.306515 |
| H  | -2.217966 | 2.764935  | -2.030926 |
| C  | -0.673385 | 2.054071  | -0.792359 |
| O  | -3.681387 | 0.615870  | -2.163304 |
| H  | -3.024079 | 0.302855  | -2.806696 |
| Br | -3.854013 | -1.357390 | 0.364473  |
| C  | -2.116046 | 1.126138  | 1.896160  |
| H  | -3.092669 | 0.690045  | 2.127639  |
| H  | -2.273160 | 2.138523  | 1.512090  |
| H  | -1.563276 | 1.202189  | 2.837235  |
| C  | -0.954393 | -1.064767 | 1.631353  |
| H  | -1.817765 | -1.486188 | 2.150465  |
| H  | -0.189594 | -0.861345 | 2.382809  |
| H  | -0.588575 | -1.841014 | 0.951389  |
| C  | 0.249342  | 3.165255  | -1.259051 |
| H  | -0.144289 | 3.623289  | -2.171041 |
| H  | 1.265125  | 2.813422  | -1.470994 |
| H  | 0.340356  | 3.961897  | -0.510074 |
| C  | 0.753939  | 1.737600  | 1.266044  |
| H  | 1.281578  | 2.542531  | 0.754005  |
| H  | 0.128877  | 2.226445  | 2.017578  |
| C  | 0.788848  | 0.053634  | -0.642077 |
| H  | 1.292970  | 0.653677  | -1.403852 |
| H  | 0.185506  | -0.674492 | -1.190406 |
| C  | 1.844213  | 0.920348  | 1.974207  |
| H  | 2.457770  | 1.598927  | 2.577506  |
| H  | 1.421454  | 0.189320  | 2.672713  |
| C  | 1.878456  | -0.708946 | 0.116893  |
| H  | 1.455265  | -1.486210 | 0.750951  |
| C  | 2.773694  | 0.145481  | 1.019576  |
| Cl | 3.710629  | 1.378742  | -0.000655 |
| C  | 3.809147  | -0.672387 | 1.788055  |
| H  | 3.298285  | -1.420506 | 2.407400  |
| H  | 4.396513  | -0.023694 | 2.443702  |
| H  | 4.482862  | -1.192138 | 1.104478  |
| Br | 2.919217  | -1.772925 | -1.213210 |

SCF Energy (PCM/mPW1PW91/6-31+G\*\*) =  
-6264.56683223

Number of imaginary frequencies = 0

## 1o\_C004

## B3LYP/6-31G\* Geometry

|    |           |           |           |
|----|-----------|-----------|-----------|
| C  | -1.365212 | 0.212236  | 0.884556  |
| C  | -2.978478 | 1.021358  | -0.959689 |
| C  | -0.132089 | 0.998362  | 0.203235  |
| C  | -2.338740 | -0.166768 | -0.257991 |
| H  | -3.696620 | 1.500912  | -0.274157 |
| H  | -1.858032 | -0.800599 | -1.002806 |
| C  | -1.906922 | 2.001892  | -1.324837 |
| H  | -2.208414 | 2.732739  | -2.072734 |
| C  | -0.672593 | 2.046163  | -0.807151 |
| O  | -3.645179 | 0.639248  | -2.155692 |
| H  | -4.341456 | 0.012957  | -1.890979 |
| Br | -3.864787 | -1.349368 | 0.350984  |
| C  | -2.091989 | 1.112835  | 1.911365  |
| H  | -3.069852 | 0.681110  | 2.146504  |
| H  | -2.245632 | 2.129929  | 1.538673  |
| H  | -1.530857 | 1.175762  | 2.848473  |
| C  | -0.944255 | -1.081665 | 1.613851  |
| H  | -1.806216 | -1.503262 | 2.136558  |
| H  | -0.173845 | -0.891547 | 2.362998  |
| H  | -0.587563 | -1.851945 | 0.922669  |
| C  | 0.253468  | 3.149415  | -1.286547 |
| H  | 0.347935  | 3.954446  | -0.546725 |
| H  | -0.139885 | 3.597533  | -2.203448 |
| H  | 1.267871  | 2.792873  | -1.496700 |
| C  | 0.759189  | 1.742244  | 1.253298  |
| H  | 1.288399  | 2.542075  | 0.734775  |
| H  | 0.134785  | 2.238733  | 2.000399  |
| C  | 0.795514  | 0.050665  | -0.647802 |
| H  | 1.298403  | 0.649600  | -1.410911 |
| H  | 0.192502  | -0.677224 | -1.196483 |
| C  | 1.846030  | 0.926405  | 1.967824  |
| H  | 2.458185  | 1.605554  | 2.571931  |
| H  | 1.419677  | 0.197435  | 2.666649  |
| C  | 1.885997  | -0.708351 | 0.113929  |
| H  | 1.464596  | -1.486299 | 0.748339  |
| C  | 2.778151  | 0.148630  | 1.017700  |
| Cl | 3.718750  | 1.379288  | -0.001230 |
| C  | 3.810852  | -0.667712 | 1.791645  |
| H  | 3.297901  | -1.413767 | 2.411843  |
| H  | 4.396959  | -0.017540 | 2.446985  |
| H  | 4.486000  | -1.189911 | 1.111321  |
| Br | 2.932052  | -1.772224 | -1.211757 |

SCF Energy (PCM/mPW1PW91/6-31+G\*\*) =  
-6264.56931238

Number of imaginary frequencies = 0



## 1o\_C005

## B3LYP/6-31G\* Geometry

|    |           |           |           |
|----|-----------|-----------|-----------|
| C  | -1.431191 | 0.140817  | 0.919209  |
| C  | -2.930116 | 1.138481  | -0.930411 |
| C  | -0.157303 | 0.942238  | 0.355478  |
| C  | -2.375740 | -0.128100 | -0.281785 |
| H  | -3.727982 | 1.546705  | -0.299589 |
| H  | -1.867460 | -0.727998 | -1.039366 |
| C  | -1.835608 | 2.154509  | -1.094953 |
| H  | -2.104527 | 2.991228  | -1.738571 |
| C  | -0.618589 | 2.113646  | -0.534229 |
| O  | -3.576284 | 0.877996  | -2.173041 |
| H  | -2.890555 | 0.610271  | -2.807093 |
| Br | -3.935276 | -1.294326 | 0.190145  |
| C  | -2.172502 | 0.976946  | 1.988935  |
| H  | -3.135396 | 0.508234  | 2.213682  |
| H  | -2.359146 | 2.002827  | 1.658135  |
| H  | -1.602594 | 1.022975  | 2.921255  |
| C  | -1.030601 | -1.207076 | 1.557569  |
| H  | -1.918115 | -1.697976 | 1.962314  |
| H  | -0.330087 | -1.071510 | 2.387777  |
| H  | -0.584183 | -1.898828 | 0.835602  |
| C  | 0.347845  | 3.239264  | -0.834635 |
| H  | 0.603816  | 3.811227  | 0.065686  |
| H  | -0.094563 | 3.938822  | -1.549738 |
| H  | 1.289915  | 2.877654  | -1.263808 |
| C  | 0.694403  | 1.451557  | 1.569410  |
| H  | 0.272988  | 2.387297  | 1.951166  |
| H  | 0.600097  | 0.735454  | 2.391036  |
| C  | 0.755670  | 0.019206  | -0.538158 |
| H  | 1.167357  | 0.590072  | -1.375811 |
| H  | 0.168557  | -0.785570 | -0.983612 |
| C  | 2.198372  | 1.677541  | 1.309507  |
| H  | 2.343208  | 2.540296  | 0.662345  |
| H  | 2.674595  | 1.931614  | 2.263598  |
| C  | 1.923001  | -0.582290 | 0.239529  |
| H  | 1.568781  | -1.089207 | 1.136708  |
| C  | 2.958445  | 0.457371  | 0.694711  |
| Cl | 3.914061  | 1.070927  | -0.774356 |
| C  | 3.976496  | -0.136519 | 1.666522  |
| H  | 3.457332  | -0.468782 | 2.575213  |
| H  | 4.718988  | 0.614153  | 1.950174  |
| H  | 4.487075  | -0.995004 | 1.224669  |
| Br | 2.721494  | -2.081367 | -0.793390 |

SCF Energy (PCM/mPW1PW91/6-31+G\*\*) =  
-6264.56332234

Number of imaginary frequencies = 0

## 1o\_C006

## B3LYP/6-31G\* Geometry

|    |           |           |           |
|----|-----------|-----------|-----------|
| C  | -1.417957 | 0.138406  | 0.920164  |
| C  | -2.938463 | 1.152278  | -0.895305 |
| C  | -0.151254 | 0.946157  | 0.346014  |
| C  | -2.359412 | -0.114024 | -0.278902 |
| H  | -3.681501 | 1.579752  | -0.202162 |
| H  | -1.870521 | -0.695588 | -1.060185 |
| C  | -1.838434 | 2.147299  | -1.112308 |
| H  | -2.103584 | 2.963788  | -1.781033 |
| C  | -0.622613 | 2.110371  | -0.550946 |
| O  | -3.552429 | 0.899043  | -2.152297 |
| H  | -4.276552 | 0.271817  | -1.980607 |
| Br | -3.936202 | -1.293434 | 0.179903  |
| C  | -2.150245 | 0.968721  | 2.000932  |
| H  | -3.118354 | 0.508651  | 2.222471  |
| H  | -2.325484 | 2.000692  | 1.683383  |
| H  | -1.578383 | 0.996507  | 2.932713  |
| C  | -1.015160 | -1.214019 | 1.546071  |
| H  | -1.900331 | -1.705840 | 1.956378  |
| H  | -0.309211 | -1.084315 | 2.372606  |
| H  | -0.574693 | -1.901922 | 0.817171  |
| C  | 0.344445  | 3.230987  | -0.869438 |
| H  | -0.100407 | 3.920868  | -1.592209 |
| H  | 1.284052  | 2.863675  | -1.298976 |
| H  | 0.604750  | 3.815209  | 0.022007  |
| C  | 0.702220  | 1.462749  | 1.555369  |
| H  | 0.280097  | 2.399590  | 1.933735  |
| H  | 0.613505  | 0.750099  | 2.381066  |
| C  | 0.762529  | 0.023711  | -0.547196 |
| H  | 1.174070  | 0.595724  | -1.383825 |
| H  | 0.175856  | -0.778953 | -0.996616 |
| C  | 2.204079  | 1.690477  | 1.286317  |
| H  | 2.341674  | 2.542505  | 0.623653  |
| H  | 2.684038  | 1.962326  | 2.233616  |
| C  | 1.928467  | -0.577164 | 0.233431  |
| H  | 1.573214  | -1.080709 | 1.131966  |
| C  | 2.964603  | 0.462451  | 0.688331  |
| Cl | 3.935872  | 1.061253  | -0.775080 |
| C  | 3.970589  | -0.128820 | 1.674442  |
| H  | 3.442107  | -0.448190 | 2.582449  |
| H  | 4.716546  | 0.619053  | 1.956409  |
| H  | 4.478086  | -0.995566 | 1.245125  |
| Br | 2.727068  | -2.081718 | -0.790939 |

SCF Energy (PCM/mPW1PW91/6-31+G\*\*) =  
-6264.56533994

Number of imaginary frequencies = 0

## 1o\_C007

## B3LYP/6-31G\* Geometry

|    |           |           |           |
|----|-----------|-----------|-----------|
| C  | -1.571561 | -0.872967 | 0.528113  |
| C  | -2.568011 | 1.505175  | 0.360598  |
| C  | -0.084754 | -0.233479 | 0.643210  |
| C  | -2.394757 | 0.140747  | -0.293668 |
| H  | -3.340621 | 1.419428  | 1.143226  |
| H  | -1.972088 | 0.272197  | -1.288492 |
| C  | -1.301759 | 1.943070  | 1.033474  |
| H  | -1.351118 | 2.949272  | 1.445250  |
| C  | -0.216574 | 1.187695  | 1.257118  |
| O  | -2.961996 | 2.494061  | -0.583679 |
| H  | -3.831719 | 2.216407  | -0.920608 |
| Br | -4.256838 | -0.509963 | -0.743038 |
| C  | -2.181341 | -1.077292 | 1.933753  |
| H  | -3.248616 | -1.302097 | 1.839894  |
| H  | -2.071179 | -0.194693 | 2.568791  |
| H  | -1.709542 | -1.923144 | 2.443308  |
| C  | -1.607377 | -2.243671 | -0.187955 |
| H  | -2.604716 | -2.677916 | -0.082661 |
| H  | -0.899712 | -2.955474 | 0.245946  |
| H  | -1.413207 | -2.175372 | -1.262760 |
| C  | 0.852168  | 1.752446  | 2.170961  |
| H  | 0.551300  | 2.743087  | 2.523970  |
| H  | 1.817748  | 1.857870  | 1.672946  |
| H  | 0.999814  | 1.123913  | 3.057922  |
| C  | 0.787584  | -1.162970 | 1.545224  |
| H  | 0.562757  | -0.967601 | 2.598050  |
| H  | 0.496841  | -2.202998 | 1.378851  |
| C  | 0.531511  | -0.146655 | -0.806327 |
| H  | 0.166053  | 0.751678  | -1.308187 |
| H  | 0.161638  | -0.995917 | -1.388221 |
| C  | 2.315430  | -1.071358 | 1.351224  |
| H  | 2.702161  | -0.110095 | 1.695247  |
| H  | 2.796719  | -1.843999 | 1.960773  |
| C  | 2.060450  | -0.187808 | -0.990212 |
| H  | 2.283708  | -0.380960 | -2.039995 |
| C  | 2.724648  | -1.261961 | -0.111467 |
| Cl | 4.562337  | -1.139061 | -0.214930 |
| C  | 2.385529  | -2.659143 | -0.656945 |
| H  | 1.307544  | -2.842000 | -0.656440 |
| H  | 2.861863  | -3.424473 | -0.037571 |
| H  | 2.752473  | -2.772187 | -1.681138 |
| Br | 2.849153  | 1.629267  | -0.749747 |

SCF Energy (PCM/mPW1PW91/6-31+G\*\*) =  
-6264.56134413

Number of imaginary frequencies = 0

## 1o\_C008

## B3LYP/6-31G\* Geometry

|    |           |           |           |
|----|-----------|-----------|-----------|
| C  | -1.585392 | -0.874923 | 0.511827  |
| C  | -2.539640 | 1.529677  | 0.329649  |
| C  | -0.091115 | -0.258159 | 0.635717  |
| C  | -2.410458 | 0.147045  | -0.310937 |
| H  | -3.365842 | 1.504226  | 1.050052  |
| H  | -1.990447 | 0.248300  | -1.312047 |
| C  | -1.288992 | 1.916122  | 1.065446  |
| H  | -1.339255 | 2.905683  | 1.517895  |
| C  | -0.208008 | 1.150097  | 1.278695  |
| O  | -2.936197 | 2.525585  | -0.612170 |
| H  | -2.155624 | 2.742728  | -1.147766 |
| Br | -4.266166 | -0.495584 | -0.726121 |
| C  | -2.200371 | -1.083998 | 1.914782  |
| H  | -3.266544 | -1.309095 | 1.814166  |
| H  | -2.095364 | -0.203970 | 2.554295  |
| H  | -1.729813 | -1.931230 | 2.423478  |
| C  | -1.631619 | -2.242638 | -0.210883 |
| H  | -2.637627 | -2.659208 | -0.124584 |
| H  | -0.942637 | -2.967935 | 0.230670  |
| H  | -1.419884 | -2.173318 | -1.282584 |
| C  | 0.851558  | 1.682524  | 2.221786  |
| H  | 0.548349  | 2.661245  | 2.604890  |
| H  | 1.822336  | 1.802304  | 1.737111  |
| H  | 0.988846  | 1.024135  | 3.088185  |
| C  | 0.777828  | -1.211020 | 1.516351  |
| H  | 0.547089  | -1.046408 | 2.573034  |
| H  | 0.489137  | -2.245744 | 1.318111  |
| C  | 0.524762  | -0.159248 | -0.811510 |
| H  | 0.153102  | 0.736566  | -1.313411 |
| H  | 0.162393  | -1.009759 | -1.396268 |
| C  | 2.306817  | -1.112376 | 1.332823  |
| H  | 2.691279  | -0.159865 | 1.702475  |
| H  | 2.786093  | -1.899111 | 1.925704  |
| C  | 2.053197  | -0.183607 | -0.992758 |
| H  | 2.282309  | -0.354759 | -2.045124 |
| C  | 2.724143  | -1.267963 | -0.131873 |
| Cl | 4.559983  | -1.124041 | -0.227535 |
| C  | 2.398502  | -2.657127 | -0.706044 |
| H  | 1.322599  | -2.852720 | -0.702466 |
| H  | 2.887204  | -3.429254 | -0.105129 |
| H  | 2.761050  | -2.744575 | -1.734295 |
| Br | 2.819990  | 1.638994  | -0.715861 |

SCF Energy (PCM/mPW1PW91/6-31+G\*\*) =  
--6264.55998262

Number of imaginary frequencies = 0

## 1o\_C009

## B3LYP/6-31G\* Geometry

|    |           |           |           |
|----|-----------|-----------|-----------|
| C  | 1.633357  | 0.938449  | 0.440107  |
| C  | 2.193857  | -1.599285 | -0.021351 |
| C  | 0.110298  | 0.405401  | 0.578922  |
| C  | 2.379001  | -0.119258 | -0.417113 |
| H  | 3.145100  | -1.991075 | 0.359774  |
| H  | 2.079866  | -0.025402 | -1.458942 |
| C  | 1.146526  | -1.807112 | 1.036347  |
| H  | 1.218022  | -2.746043 | 1.585593  |
| C  | 0.189485  | -0.927549 | 1.362325  |
| O  | 1.870276  | -2.282813 | -1.251034 |
| H  | 1.508492  | -3.151795 | -1.014427 |
| Br | 4.349000  | 0.266227  | -0.553445 |
| C  | 2.273674  | 1.118673  | 1.835288  |
| H  | 3.310737  | 1.445696  | 1.725384  |
| H  | 2.274648  | 0.196709  | 2.420619  |
| H  | 1.741423  | 1.886400  | 2.405866  |
| C  | 1.744579  | 2.301652  | -0.282741 |
| H  | 2.799699  | 2.519751  | -0.469194 |
| H  | 1.348037  | 3.120030  | 0.324690  |
| H  | 1.240627  | 2.320030  | -1.254690 |
| C  | -0.714742 | -1.236597 | 2.533747  |
| H  | -0.392113 | -2.162502 | 3.019532  |
| H  | -1.753804 | -1.373200 | 2.222394  |
| H  | -0.691132 | -0.443802 | 3.290809  |
| C  | -0.750383 | 1.483787  | 1.301008  |
| H  | -0.510209 | 1.508357  | 2.368062  |
| H  | -0.472145 | 2.468097  | 0.917192  |
| C  | -0.478786 | 0.154849  | -0.857114 |
| H  | -0.059337 | -0.759266 | -1.282298 |
| H  | -0.165722 | 0.974125  | -1.513610 |
| C  | -2.280656 | 1.344845  | 1.155951  |
| H  | -2.651205 | 0.461805  | 1.679831  |
| H  | -2.762221 | 2.212926  | 1.619613  |
| C  | -2.005767 | 0.080665  | -1.001969 |
| H  | -2.268434 | 0.056379  | -2.060155 |
| C  | -2.713879 | 1.257689  | -0.310515 |
| Cl | -4.544594 | 1.027771  | -0.359957 |
| C  | -2.453438 | 2.556207  | -1.092571 |
| H  | -1.389161 | 2.806545  | -1.118367 |
| H  | -2.986257 | 3.385287  | -0.618751 |
| H  | -2.810637 | 2.465509  | -2.122486 |
| Br | -2.666062 | -1.697618 | -0.374008 |

SCF Energy (PCM/mPW1PW91/6-31+G\*\*) =  
-6264.55746117

Number of imaginary frequencies = 0

## 1o\_C010

## B3LYP/6-31G\* Geometry

|    |           |           |           |
|----|-----------|-----------|-----------|
| C  | 1.292496  | -0.437879 | -0.969415 |
| C  | 3.355680  | -1.269860 | 0.416384  |
| C  | 0.388259  | -0.354690 | 0.351747  |
| C  | 2.814330  | -0.328925 | -0.668999 |
| H  | 4.260839  | -0.824706 | 0.838041  |
| H  | 3.368702  | -0.513929 | -1.588348 |
| C  | 2.353303  | -1.521124 | 1.496410  |
| H  | 2.741464  | -2.076019 | 2.349359  |
| C  | 1.053455  | -1.186435 | 1.480661  |
| O  | 3.812399  | -2.502952 | -0.164423 |
| H  | 3.054573  | -3.106105 | -0.204485 |
| Br | 3.458201  | 1.535206  | -0.224137 |
| C  | 0.973636  | 0.601730  | -2.066520 |
| H  | 1.627676  | 0.419640  | -2.928051 |
| H  | 1.158800  | 1.624885  | -1.738653 |
| H  | -0.053842 | 0.520750  | -2.428260 |
| C  | 1.115177  | -1.835058 | -1.640892 |
| H  | 1.921619  | -2.027140 | -2.355406 |
| H  | 0.174703  | -1.879242 | -2.198474 |
| H  | 1.102430  | -2.652490 | -0.913994 |
| C  | 0.210941  | -1.610059 | 2.670915  |
| H  | 0.855152  | -1.915593 | 3.500112  |
| H  | -0.435436 | -2.463177 | 2.428568  |
| H  | -0.445051 | -0.812121 | 3.034747  |
| C  | 0.207319  | 1.089623  | 0.938092  |
| H  | -0.074259 | 0.986821  | 1.990325  |
| H  | 1.164272  | 1.610559  | 0.931870  |
| C  | -1.054196 | -0.937950 | 0.123131  |
| H  | -1.493427 | -1.166704 | 1.093875  |
| H  | -1.019070 | -1.883793 | -0.418633 |
| C  | -0.856162 | 1.980183  | 0.277294  |
| H  | -0.959976 | 2.901573  | 0.861105  |
| H  | -0.547524 | 2.286759  | -0.727444 |
| C  | -2.054023 | -0.010692 | -0.568190 |
| H  | -1.780277 | 0.202850  | -1.601146 |
| C  | -2.249391 | 1.339065  | 0.133404  |
| Cl | -2.937052 | 1.071530  | 1.835613  |
| C  | -3.219679 | 2.265871  | -0.595159 |
| H  | -2.854308 | 2.450750  | -1.613375 |
| H  | -3.291485 | 3.225417  | -0.075616 |
| H  | -4.214427 | 1.820928  | -0.660549 |
| Br | -3.767267 | -1.010209 | -0.796971 |

SCF Energy (PCM/mPW1PW91/6-31+G\*\*) =  
-6264.56534231

Number of imaginary frequencies = 0

## 1o\_C011

## B3LYP/6-31G\* Geometry

|    |           |           |           |
|----|-----------|-----------|-----------|
| C  | 1.281871  | -0.442314 | -0.959233 |
| C  | 3.335892  | -1.290739 | 0.425787  |
| C  | 0.387022  | -0.322203 | 0.367076  |
| C  | 2.805061  | -0.352722 | -0.667560 |
| H  | 4.252972  | -0.855243 | 0.843158  |
| H  | 3.342703  | -0.544170 | -1.597310 |
| C  | 2.342766  | -1.491768 | 1.521249  |
| H  | 2.729161  | -2.037917 | 2.379440  |
| C  | 1.056853  | -1.115916 | 1.517893  |
| O  | 3.641539  | -2.587288 | -0.115700 |
| H  | 4.488633  | -2.516648 | -0.585075 |
| Br | 3.485547  | 1.504084  | -0.236538 |
| C  | 0.975162  | 0.592361  | -2.064728 |
| H  | 1.627214  | 0.396163  | -2.924763 |
| H  | 1.168096  | 1.617568  | -1.747299 |
| H  | -0.052459 | 0.517447  | -2.427370 |
| C  | 1.089119  | -1.843991 | -1.613044 |
| H  | 1.836853  | -2.001188 | -2.397281 |
| H  | 0.107065  | -1.911562 | -2.091299 |
| H  | 1.193869  | -2.660711 | -0.897074 |
| C  | 0.227724  | -1.474189 | 2.739299  |
| H  | 0.882170  | -1.743906 | 3.572878  |
| H  | -0.424253 | -2.335371 | 2.546323  |
| H  | -0.419588 | -0.656886 | 3.074270  |
| C  | 0.196710  | 1.142349  | 0.897902  |
| H  | -0.078860 | 1.078027  | 1.954601  |
| H  | 1.149082  | 1.671725  | 0.867485  |
| C  | -1.051967 | -0.924887 | 0.171816  |
| H  | -1.487163 | -1.105578 | 1.154471  |
| H  | -1.008255 | -1.897165 | -0.319392 |
| C  | -0.878022 | 1.998798  | 0.209341  |
| H  | -0.994045 | 2.936395  | 0.764519  |
| H  | -0.573057 | 2.279138  | -0.803975 |
| C  | -2.054971 | -0.036861 | -0.562801 |
| H  | -1.775872 | 0.135706  | -1.602190 |
| C  | -2.264367 | 1.338639  | 0.083315  |
| Cl | -2.958956 | 1.133741  | 1.792006  |
| C  | -3.238699 | 2.227869  | -0.685606 |
| H  | -2.871318 | 2.372838  | -1.709556 |
| H  | -3.318740 | 3.207568  | -0.206374 |
| H  | -4.230041 | 1.773504  | -0.735465 |
| Br | -3.760837 | -1.056129 | -0.761618 |

SCF Energy (PCM/mPW1PW91/6-31+G\*\*) =  
-6264.56041187

Number of imaginary frequencies = 0

## 1o\_C012

## B3LYP/6-31G\* Geometry

|    |           |           |           |
|----|-----------|-----------|-----------|
| C  | 1.391696  | -0.246090 | 1.128939  |
| C  | 3.167751  | 1.215150  | -0.185371 |
| C  | 0.352592  | 0.619946  | 0.285967  |
| C  | 2.817859  | -0.128366 | 0.517281  |
| H  | 3.174729  | 1.039154  | -1.271070 |
| H  | 3.550380  | -0.281065 | 1.308628  |
| C  | 2.172104  | 2.299409  | 0.109565  |
| H  | 2.581962  | 3.306792  | 0.110645  |
| C  | 0.865027  | 2.079805  | 0.306575  |
| O  | 4.456347  | 1.673097  | 0.215146  |
| H  | 5.105306  | 1.062760  | -0.171629 |
| Br | 3.330252  | -1.607279 | -0.762172 |
| C  | 0.956550  | -1.717246 | 1.294376  |
| H  | 1.732816  | -2.280109 | 1.822910  |
| H  | 0.791072  | -2.229009 | 0.344242  |
| H  | 0.042049  | -1.784156 | 1.892612  |
| C  | 1.542220  | 0.325481  | 2.569787  |
| H  | 2.178692  | -0.340418 | 3.163056  |
| H  | 0.575505  | 0.386487  | 3.079190  |
| H  | 1.992526  | 1.319872  | 2.579345  |
| C  | -0.055750 | 3.247682  | 0.569611  |
| H  | 0.492648  | 4.189534  | 0.473273  |
| H  | -0.478838 | 3.214400  | 1.582312  |
| H  | -0.905774 | 3.283325  | -0.122928 |
| C  | 0.300569  | 0.139772  | -1.207781 |
| H  | 1.168262  | 0.514395  | -1.754267 |
| H  | 0.366878  | -0.950832 | -1.267129 |
| C  | -1.094018 | 0.487873  | 0.883576  |
| H  | -1.607510 | 1.450427  | 0.892735  |
| H  | -1.062798 | 0.156381  | 1.922112  |
| C  | -0.965083 | 0.623316  | -1.931624 |
| H  | -1.010671 | 1.713508  | -1.880195 |
| H  | -0.909561 | 0.366341  | -2.995305 |
| C  | -1.963559 | -0.479749 | 0.083876  |
| H  | -1.473339 | -1.448189 | -0.017549 |
| C  | -2.274314 | 0.019329  | -1.340498 |
| Cl | -3.536263 | 1.373988  | -1.284290 |
| C  | -2.846899 | -1.094833 | -2.214360 |
| H  | -2.090217 | -1.880250 | -2.342047 |
| H  | -3.112834 | -0.711186 | -3.202842 |
| H  | -3.732528 | -1.538053 | -1.752596 |
| Br | -3.590353 | -0.954194 | 1.119279  |

SCF Energy (PCM/mPW1PW91/6-31+G\*\*) =  
-6264.55746357

Number of imaginary frequencies = 0

## 1o\_C013

## B3LYP/6-31G\* Geometry

|    |           |           |           |
|----|-----------|-----------|-----------|
| C  | 1.427735  | -0.096979 | 1.127680  |
| C  | 3.373788  | 1.155841  | -0.086692 |
| C  | 0.408223  | 0.571230  | 0.099868  |
| C  | 2.867045  | -0.153055 | 0.555910  |
| H  | 3.934604  | 0.910121  | -0.998294 |
| H  | 3.558026  | -0.401563 | 1.359622  |
| C  | 2.285589  | 2.143372  | -0.407653 |
| H  | 2.652041  | 3.117876  | -0.735685 |
| C  | 0.963608  | 1.960248  | -0.285900 |
| O  | 4.284403  | 1.716766  | 0.879788  |
| H  | 4.561142  | 2.587596  | 0.552005  |
| Br | 3.221153  | -1.682376 | -0.707851 |
| C  | 0.980544  | -1.495787 | 1.600591  |
| H  | 1.735066  | -1.914409 | 2.276076  |
| H  | 0.860577  | -2.209395 | 0.783201  |
| H  | 0.041996  | -1.439616 | 2.161880  |
| C  | 1.570520  | 0.775234  | 2.412725  |
| H  | 2.243128  | 0.277085  | 3.118926  |
| H  | 0.609157  | 0.898715  | 2.919403  |
| H  | 1.982806  | 1.763428  | 2.207150  |
| C  | 0.041500  | 3.132123  | -0.544708 |
| H  | 0.598668  | 3.963752  | -0.986746 |
| H  | -0.405072 | 3.499494  | 0.388934  |
| H  | -0.792494 | 2.893443  | -1.212858 |
| C  | 0.280366  | -0.264657 | -1.227176 |
| H  | 1.148583  | -0.081762 | -1.862076 |
| H  | 0.302414  | -1.334467 | -1.004158 |
| C  | -1.026564 | 0.663709  | 0.740244  |
| H  | -1.497475 | 1.624034  | 0.524894  |
| H  | -0.977178 | 0.593366  | 1.826427  |
| C  | -0.989505 | 0.051773  | -2.031830 |
| H  | -0.994334 | 1.106019  | -2.312126 |
| H  | -0.973649 | -0.513736 | -2.970395 |
| C  | -1.963113 | -0.427545 | 0.226295  |
| H  | -1.517585 | -1.413395 | 0.362340  |
| C  | -2.305216 | -0.292251 | -1.269061 |
| Cl | -3.490358 | 1.109627  | -1.529014 |
| C  | -2.976183 | -1.552654 | -1.811284 |
| H  | -2.273228 | -2.393435 | -1.744011 |
| H  | -3.252735 | -1.420228 | -2.860582 |
| H  | -3.870458 | -1.800428 | -1.234545 |
| Br | -3.570957 | -0.544307 | 1.387893  |

SCF Energy (PCM/mPW1PW91/6-31+G\*\*) =  
-6264.55301610

Number of imaginary frequencies = 0

## 1o\_C014

## B3LYP/6-31G\* Geometry

|    |           |           |           |
|----|-----------|-----------|-----------|
| C  | 1.424499  | -0.032866 | 1.130822  |
| C  | 3.399832  | 1.172275  | -0.092532 |
| C  | 0.416001  | 0.535820  | 0.031945  |
| C  | 2.878299  | -0.110192 | 0.597586  |
| H  | 4.066588  | 0.881271  | -0.908492 |
| H  | 3.552976  | -0.334560 | 1.422180  |
| C  | 2.308180  | 2.069672  | -0.599296 |
| H  | 2.676136  | 3.003956  | -1.021454 |
| C  | 0.983807  | 1.872519  | -0.499557 |
| O  | 4.253231  | 1.904681  | 0.801484  |
| H  | 3.682988  | 2.430203  | 1.384547  |
| Br | 3.254405  | -1.688997 | -0.602406 |
| C  | 1.001230  | -1.399711 | 1.708841  |
| H  | 1.718275  | -1.707929 | 2.478887  |
| H  | 0.983249  | -2.193844 | 0.960278  |
| H  | 0.019500  | -1.340262 | 2.190259  |
| C  | 1.499158  | 0.940215  | 2.350042  |
| H  | 2.342489  | 0.674777  | 2.996393  |
| H  | 0.598461  | 0.869145  | 2.965931  |
| H  | 1.609078  | 1.985806  | 2.050981  |
| C  | 0.060343  | 2.992472  | -0.933568 |
| H  | 0.622872  | 3.758467  | -1.475348 |
| H  | -0.403691 | 3.482119  | -0.066759 |
| H  | -0.761876 | 2.660737  | -1.574845 |
| C  | 0.273013  | -0.436572 | -1.196844 |
| H  | 1.139551  | -0.333654 | -1.851168 |
| H  | 0.287399  | -1.474648 | -0.854458 |
| C  | -1.016297 | 0.715590  | 0.660197  |
| H  | -1.474430 | 1.653290  | 0.342662  |
| H  | -0.965370 | 0.762788  | 1.747391  |
| C  | -0.997866 | -0.209739 | -2.031257 |
| H  | -0.988942 | 0.795154  | -2.454785 |
| H  | -0.990124 | -0.897291 | -2.884728 |
| C  | -1.970996 | -0.410579 | 0.268290  |
| H  | -1.539027 | -1.383698 | 0.504617  |
| C  | -2.319194 | -0.428326 | -1.230890 |
| Cl | -3.463666 | 0.974105  | -1.632628 |
| C  | -3.033239 | -1.717255 | -1.632413 |
| H  | -2.358149 | -2.568503 | -1.473774 |
| H  | -3.307915 | -1.690472 | -2.690245 |
| H  | -3.933534 | -1.870853 | -1.032720 |
| Br | -3.573281 | -0.376122 | 1.442385  |

SCF Energy (PCM/mPW1PW91/6-31+G\*\*) =  
-6264.55386673

Number of imaginary frequencies = 0

**1p\_C001****B3LYP/6-31G\* Geometry**

|    |           |           |           |
|----|-----------|-----------|-----------|
| C  | 1.475436  | 0.794893  | 0.561979  |
| C  | 2.521815  | -1.554775 | 0.344938  |
| C  | -0.000200 | 0.131079  | 0.669692  |
| C  | 2.313871  | -0.184844 | -0.283595 |
| H  | 3.277766  | -1.462475 | 1.142962  |
| H  | 1.887110  | -0.308136 | -1.278052 |
| C  | 1.254179  | -2.041680 | 0.979741  |
| H  | 1.312823  | -3.064893 | 1.346164  |
| C  | 0.150783  | -1.315787 | 1.212461  |
| O  | 2.959805  | -2.513998 | -0.610630 |
| H  | 3.818937  | -2.195375 | -0.938746 |
| Br | 4.157247  | 0.518973  | -0.730267 |
| C  | 2.086829  | 0.974912  | 1.970386  |
| H  | 3.153609  | 1.202778  | 1.878080  |
| H  | 1.978704  | 0.080891  | 2.590386  |
| H  | 1.615363  | 1.811552  | 2.494759  |
| C  | 1.478916  | 2.180342  | -0.128071 |
| H  | 2.436220  | 2.673944  | 0.058485  |
| H  | 0.689727  | 2.835595  | 0.248358  |
| H  | 1.371698  | 2.114474  | -1.214929 |
| C  | -0.930122 | -1.948822 | 2.065341  |
| H  | -1.119840 | -1.368740 | 2.977004  |
| H  | -0.618389 | -2.949577 | 2.378259  |
| H  | -1.877052 | -2.050960 | 1.531002  |
| C  | -0.863774 | 1.011533  | 1.625178  |
| H  | -0.603115 | 0.789615  | 2.664712  |
| H  | -0.607761 | 2.061489  | 1.471007  |
| C  | -0.639142 | 0.122376  | -0.769595 |
| H  | -0.263441 | -0.729991 | -1.340075 |
| H  | -0.304155 | 1.022645  | -1.290929 |
| C  | -2.388983 | 0.898451  | 1.472351  |
| H  | -2.747676 | -0.082786 | 1.799398  |
| H  | -2.868235 | 1.638562  | 2.122871  |
| C  | -2.164108 | 0.157646  | -0.931408 |
| H  | -2.408392 | 0.435377  | -1.955956 |
| C  | -2.904068 | 1.086205  | 0.045838  |
| Cl | -2.440966 | 2.812801  | -0.528811 |
| C  | -4.426914 | 1.025915  | -0.040292 |
| H  | -4.865109 | 1.819087  | 0.571467  |
| H  | -4.782185 | 0.058665  | 0.324280  |
| H  | -4.768610 | 1.152235  | -1.071799 |
| Br | -2.948022 | -1.696524 | -0.852692 |

**SCF Energy (PCM/mPW1PW91/6-31+G\*\*) =**  
**-6264.56585401**

**Number of imaginary frequencies = 0**

**1p\_C002****B3LYP/6-31G\* Geometry**

|    |           |           |           |
|----|-----------|-----------|-----------|
| C  | -1.323726 | 0.211607  | 0.870709  |
| C  | -3.068284 | 1.006205  | -0.848402 |
| C  | -0.167947 | 1.049592  | 0.132823  |
| C  | -2.354761 | -0.178022 | -0.212682 |
| H  | -3.772557 | 1.434538  | -0.116346 |
| H  | -1.902754 | -0.782883 | -0.998707 |
| C  | -2.061233 | 2.050259  | -1.225760 |
| H  | -2.442249 | 2.808410  | -1.907326 |
| C  | -0.798390 | 2.123080  | -0.783916 |
| O  | -3.774259 | 0.634905  | -2.025339 |
| H  | -4.436849 | -0.022230 | -1.748985 |
| Br | -3.803594 | -1.411539 | 0.467066  |
| C  | -2.001055 | 1.075435  | 1.961617  |
| H  | -2.914220 | 0.579596  | 2.304989  |
| H  | -2.267197 | 2.072006  | 1.597668  |
| H  | -1.346545 | 1.197602  | 2.829020  |
| C  | -0.790434 | -1.070867 | 1.543564  |
| H  | -1.595951 | -1.550772 | 2.104361  |
| H  | 0.011939  | -0.853297 | 2.254389  |
| H  | -0.426557 | -1.804692 | 0.816796  |
| C  | 0.047326  | 3.286079  | -1.260754 |
| H  | -0.539126 | 3.932977  | -1.919080 |
| H  | 0.927178  | 2.958844  | -1.828812 |
| H  | 0.411287  | 3.904262  | -0.431620 |
| C  | 0.765800  | 1.700093  | 1.212087  |
| H  | 0.345869  | 2.654470  | 1.545333  |
| H  | 0.799793  | 1.064073  | 2.101963  |
| C  | 0.729348  | 0.138280  | -0.789104 |
| H  | 1.084576  | 0.715711  | -1.649230 |
| H  | 0.141776  | -0.679380 | -1.210688 |
| C  | 2.210851  | 1.919471  | 0.742956  |
| H  | 2.228273  | 2.569156  | -0.135927 |
| H  | 2.779605  | 2.440099  | 1.518734  |
| C  | 1.942005  | -0.449534 | -0.059396 |
| H  | 1.626578  | -0.995392 | 0.821721  |
| C  | 2.970452  | 0.622866  | 0.360182  |
| Cl | 3.827507  | -0.022676 | 1.880508  |
| C  | 4.058047  | 0.935759  | -0.665055 |
| H  | 4.700964  | 0.073736  | -0.844044 |
| H  | 4.669780  | 1.771753  | -0.312891 |
| H  | 3.594683  | 1.221846  | -1.617318 |
| Br | 2.732170  | -1.900633 | -1.176013 |

**SCF Energy (PCM/mPW1PW91/6-31+G\*\*) =**  
**-6264.56679309**

**Number of imaginary frequencies = 0**

## 1p\_C003

## B3LYP/6-31G\* Geometry

|    |           |           |           |
|----|-----------|-----------|-----------|
| C  | 1.489195  | 0.796400  | 0.553224  |
| C  | 2.495910  | -1.577302 | 0.307205  |
| C  | 0.005660  | 0.154206  | 0.666408  |
| C  | 2.330328  | -0.185725 | -0.299938 |
| H  | 3.307063  | -1.545437 | 1.044233  |
| H  | 1.902779  | -0.273182 | -1.299655 |
| C  | 1.240908  | -2.019581 | 1.003156  |
| H  | 1.300688  | -3.030141 | 1.405553  |
| C  | 0.141555  | -1.284486 | 1.231476  |
| O  | 2.940079  | -2.538922 | -0.648727 |
| H  | 2.186283  | -2.739407 | -1.227506 |
| Br | 4.165400  | 0.513632  | -0.712172 |
| C  | 2.105646  | 0.971565  | 1.960072  |
| H  | 3.171877  | 1.198229  | 1.863073  |
| H  | 2.000215  | 0.076094  | 2.578431  |
| H  | 1.636857  | 1.807171  | 2.488768  |
| C  | 1.503081  | 2.183530  | -0.134940 |
| H  | 2.469777  | 2.662112  | 0.037931  |
| H  | 0.728986  | 2.850055  | 0.253020  |
| H  | 1.380857  | 2.120998  | -1.220571 |
| C  | -0.928317 | -1.891524 | 2.116757  |
| H  | -0.613707 | -2.883882 | 2.452856  |
| H  | -1.883843 | -2.005938 | 1.600312  |
| H  | -1.102354 | -1.285824 | 3.014467  |
| C  | -0.856221 | 1.053464  | 1.605657  |
| H  | -0.591178 | 0.856000  | 2.648911  |
| H  | -0.603389 | 2.100015  | 1.426586  |
| C  | -0.631827 | 0.140588  | -0.771762 |
| H  | -0.246438 | -0.704135 | -1.347244 |
| H  | -0.307269 | 1.046763  | -1.289490 |
| C  | -2.381939 | 0.932462  | 1.460961  |
| H  | -2.736764 | -0.042288 | 1.810204  |
| H  | -2.861236 | 1.684492  | 2.097549  |
| C  | -2.156121 | 0.154889  | -0.932468 |
| H  | -2.406737 | 0.414260  | -1.960303 |
| C  | -2.904213 | 1.089300  | 0.033240  |
| Cl | -2.463592 | 2.810458  | -0.571912 |
| C  | -4.426319 | 1.007107  | -0.046313 |
| H  | -4.873083 | 1.802841  | 0.555809  |
| H  | -4.767005 | 0.040536  | 0.333956  |
| H  | -4.773574 | 1.114078  | -1.078124 |
| Br | -2.911752 | -1.710180 | -0.824767 |

SCF Energy (PCM/mPW1PW91/6-31+G\*\*) =  
-6264.56420330

Number of imaginary frequencies = 0

## 1p\_C004

## B3LYP/6-31G\* Geometry

|    |           |           |           |
|----|-----------|-----------|-----------|
| C  | 1.535995  | 0.847859  | 0.553167  |
| C  | 2.146886  | -1.628768 | -0.108272 |
| C  | 0.019960  | 0.284481  | 0.651749  |
| C  | 2.286039  | -0.121360 | -0.397329 |
| H  | 3.102840  | -2.010696 | 0.272742  |
| H  | 1.961835  | 0.043632  | -1.422503 |
| C  | 1.084225  | -1.947905 | 0.906760  |
| H  | 1.161326  | -2.934759 | 1.364368  |
| C  | 0.114532  | -1.114164 | 1.306721  |
| O  | 1.878929  | -2.235615 | -1.389037 |
| H  | 1.628251  | -3.159271 | -1.227999 |
| Br | 4.244786  | 0.314985  | -0.546811 |
| C  | 2.186518  | 0.905364  | 1.953941  |
| H  | 3.221564  | 1.245738  | 1.864946  |
| H  | 2.195072  | -0.065526 | 2.453803  |
| H  | 1.657282  | 1.617080  | 2.595506  |
| C  | 1.622728  | 2.272048  | -0.043118 |
| H  | 2.673535  | 2.520935  | -0.214608 |
| H  | 1.217364  | 3.023876  | 0.638967  |
| H  | 1.106981  | 2.373223  | -1.002446 |
| C  | -0.797303 | -1.547178 | 2.432164  |
| H  | -0.817992 | -0.815913 | 3.248645  |
| H  | -0.451270 | -2.497255 | 2.850724  |
| H  | -1.824874 | -1.695221 | 2.088625  |
| C  | -0.847135 | 1.287440  | 1.465347  |
| H  | -0.581962 | 1.246469  | 2.526201  |
| H  | -0.609430 | 2.299425  | 1.132482  |
| C  | -0.576416 | 0.161114  | -0.795222 |
| H  | -0.142945 | -0.697924 | -1.311637 |
| H  | -0.296304 | 1.052969  | -1.364219 |
| C  | -2.371444 | 1.126483  | 1.339350  |
| H  | -2.713481 | 0.198141  | 1.808236  |
| H  | -2.863510 | 1.945470  | 1.875684  |
| C  | -2.097168 | 0.080488  | -0.940565 |
| H  | -2.371371 | 0.173145  | -1.991039 |
| C  | -2.887112 | 1.096792  | -0.099697 |
| Cl | -2.503144 | 2.751001  | -0.899664 |
| C  | -4.404716 | 0.951350  | -0.178163 |
| H  | -4.886284 | 1.786862  | 0.337234  |
| H  | -4.713852 | 0.015855  | 0.295245  |
| H  | -4.745627 | 0.941263  | -1.217667 |
| Br | -2.744177 | -1.783954 | -0.523924 |

SCF Energy (PCM/mPW1PW91/6-31+G\*\*) =  
-6264.56167755

Number of imaginary frequencies = 0

## 1p\_C005

## B3LYP/6-31G\* Geometry

|    |           |           |           |
|----|-----------|-----------|-----------|
| C  | -1.334976 | 0.080965  | 0.881781  |
| C  | -3.124056 | 1.040292  | -0.713044 |
| C  | -0.206287 | 1.056100  | 0.263156  |
| C  | -2.359386 | -0.189080 | -0.248773 |
| H  | -3.815201 | 1.357290  | 0.085227  |
| H  | -1.888879 | -0.659315 | -1.112238 |
| C  | -2.145261 | 2.138038  | -0.991458 |
| H  | -2.544695 | 2.945968  | -1.601426 |
| C  | -0.881292 | 2.192987  | -0.552941 |
| O  | -3.852956 | 0.798741  | -1.908907 |
| H  | -4.482619 | 0.085129  | -1.705294 |
| Br | -3.758868 | -1.562040 | 0.249786  |
| C  | -2.042629 | 0.753564  | 2.081206  |
| H  | -1.417464 | 0.716368  | 2.978458  |
| H  | -2.968507 | 0.215575  | 2.307321  |
| H  | -2.293251 | 1.800750  | 1.886235  |
| C  | -0.786121 | -1.279820 | 1.364330  |
| H  | -1.584630 | -1.837303 | 1.859360  |
| H  | 0.022760  | -1.166638 | 2.086855  |
| H  | -0.434259 | -1.903878 | 0.536742  |
| C  | -0.069868 | 3.422429  | -0.921995 |
| H  | 0.043827  | 4.111593  | -0.075967 |
| H  | -0.569281 | 3.973906  | -1.723439 |
| H  | 0.939751  | 3.179903  | -1.274055 |
| C  | 0.690535  | 1.714750  | 1.363925  |
| H  | 1.143974  | 2.610183  | 0.934482  |
| H  | 0.076109  | 2.075723  | 2.192925  |
| C  | 0.743441  | 0.315808  | -0.750112 |
| H  | 1.162959  | 1.055666  | -1.437409 |
| H  | 0.168177  | -0.366769 | -1.381528 |
| C  | 1.844515  | 0.868629  | 1.927477  |
| H  | 2.434730  | 1.485903  | 2.614467  |
| H  | 1.478626  | 0.024769  | 2.515867  |
| C  | 1.922899  | -0.473680 | -0.152698 |
| H  | 1.591174  | -1.377516 | 0.348201  |
| C  | 2.783591  | 0.340076  | 0.823322  |
| Cl | 3.970965  | -0.814190 | 1.649987  |
| C  | 3.620499  | 1.442979  | 0.175980  |
| H  | 4.190066  | 1.978535  | 0.940380  |
| H  | 2.979490  | 2.163751  | -0.342722 |
| H  | 4.313792  | 1.021436  | -0.553762 |
| Br | 2.982781  | -1.197501 | -1.682876 |

SCF Energy (PCM/mPW1PW91/6-31+G\*\*) =  
-6264.56708918

Number of imaginary frequencies = 0

## 1p\_C006

## B3LYP/6-31G\* Geometry

|    |           |           |           |
|----|-----------|-----------|-----------|
| C  | -1.334142 | 0.210457  | 0.867463  |
| C  | -3.070755 | 0.990647  | -0.872998 |
| C  | -0.174742 | 1.049203  | 0.139044  |
| C  | -2.371279 | -0.194260 | -0.213580 |
| H  | -3.826936 | 1.390179  | -0.187638 |
| H  | -1.898669 | -0.809088 | -0.982618 |
| C  | -2.067950 | 2.059880  | -1.203584 |
| H  | -2.455892 | 2.839152  | -1.858632 |
| C  | -0.801674 | 2.130229  | -0.768252 |
| O  | -3.818645 | 0.615915  | -2.026150 |
| H  | -3.184480 | 0.336524  | -2.707030 |
| Br | -3.793691 | -1.421263 | 0.481975  |
| C  | -2.020012 | 1.073290  | 1.953729  |
| H  | -2.925223 | 0.566526  | 2.301301  |
| H  | -2.300998 | 2.063454  | 1.583285  |
| H  | -1.365858 | 1.210998  | 2.819099  |
| C  | -0.796434 | -1.067637 | 1.546247  |
| H  | -1.601211 | -1.549590 | 2.105050  |
| H  | 0.004730  | -0.844969 | 2.256940  |
| H  | -0.429140 | -1.802432 | 0.821846  |
| C  | 0.040022  | 3.301962  | -1.230092 |
| H  | -0.548859 | 3.957859  | -1.877429 |
| H  | 0.920208  | 2.984683  | -1.803477 |
| H  | 0.404355  | 3.908100  | -0.392523 |
| C  | 0.757874  | 1.694204  | 1.222864  |
| H  | 0.338039  | 2.647220  | 1.559878  |
| H  | 0.788249  | 1.054236  | 2.109679  |
| C  | 0.724553  | 0.143607  | -0.786745 |
| H  | 1.081719  | 0.725482  | -1.643505 |
| H  | 0.138099  | -0.673706 | -1.211150 |
| C  | 2.204225  | 1.914430  | 0.758540  |
| H  | 2.225256  | 2.568615  | -0.117109 |
| H  | 2.771563  | 2.430449  | 1.538435  |
| C  | 1.936543  | -0.449411 | -0.060291 |
| H  | 1.619088  | -1.004159 | 0.814471  |
| C  | 2.964056  | 0.619367  | 0.371280  |
| Cl | 3.812968  | -0.037144 | 1.890880  |
| C  | 4.057339  | 0.938176  | -0.646227 |
| H  | 4.667772  | 1.771154  | -0.284822 |
| H  | 3.599485  | 1.231313  | -1.599029 |
| H  | 4.700597  | 0.076919  | -0.827612 |
| Br | 2.728579  | -1.889012 | -1.191048 |

SCF Energy (PCM/mPW1PW91/6-31+G\*\*) =  
-6264.56452212

Number of imaginary frequencies = 0



## 1p\_C007

## B3LYP/6-31G\* Geometry

|    |           |           |           |
|----|-----------|-----------|-----------|
| C  | -1.323750 | 0.211546  | 0.870624  |
| C  | -3.068392 | 1.006231  | -0.848308 |
| C  | -0.167957 | 1.049472  | 0.132657  |
| C  | -2.354834 | -0.178028 | -0.212749 |
| H  | -3.772573 | 1.434556  | -0.116198 |
| H  | -1.902917 | -0.782759 | -0.998912 |
| C  | -2.061328 | 2.050173  | -1.225864 |
| H  | -2.442252 | 2.808373  | -1.907426 |
| C  | -0.798419 | 2.122909  | -0.784151 |
| O  | -3.774597 | 0.634929  | -2.025165 |
| H  | -4.437069 | -0.022245 | -1.748616 |
| Br | -3.803612 | -1.411562 | 0.467097  |
| C  | -2.000935 | 1.075453  | 1.961543  |
| H  | -2.914164 | 0.579721  | 2.304927  |
| H  | -2.266937 | 2.072098  | 1.597690  |
| H  | -1.346404 | 1.197468  | 2.828957  |
| C  | -0.790433 | -1.070862 | 1.543529  |
| H  | -1.595941 | -1.550793 | 2.104325  |
| H  | 0.011877  | -0.853163 | 2.254392  |
| H  | -0.426472 | -1.804706 | 0.816830  |
| C  | 0.047259  | 3.286005  | -1.260778 |
| H  | -0.539094 | 3.932847  | -1.919247 |
| H  | 0.927279  | 2.958887  | -1.828630 |
| H  | 0.410963  | 3.904230  | -0.431549 |
| C  | 0.765698  | 1.700086  | 1.211933  |
| H  | 0.345723  | 2.654473  | 1.545107  |
| H  | 0.799712  | 1.064149  | 2.101873  |
| C  | 0.729318  | 0.138044  | -0.789085 |
| H  | 1.084443  | 0.715261  | -1.649401 |
| H  | 0.141818  | -0.679803 | -1.210408 |
| C  | 2.210780  | 1.919500  | 0.742853  |
| H  | 2.228171  | 2.569077  | -0.136116 |
| H  | 2.779454  | 2.440208  | 1.518624  |
| C  | 1.942103  | -0.449581 | -0.059386 |
| H  | 1.626747  | -0.995428 | 0.821759  |
| C  | 2.970452  | 0.622910  | 0.360187  |
| Cl | 3.827353  | -0.022555 | 1.880733  |
| C  | 4.058205  | 0.935747  | -0.664854 |
| H  | 4.669759  | 1.771875  | -0.312705 |
| H  | 3.594969  | 1.221656  | -1.617235 |
| H  | 4.701246  | 0.073767  | -0.843621 |
| Br | 2.732378  | -1.900535 | -1.176082 |

SCF Energy (PCM/mPW1PW91/6-31+G\*\*) =  
-6264.56679337

Number of imaginary frequencies = 0

## 1p\_C008

## B3LYP/6-31G\* Geometry

|    |           |           |           |
|----|-----------|-----------|-----------|
| C  | -1.348152 | 0.092348  | 0.888095  |
| C  | -3.119939 | 1.019609  | -0.749756 |
| C  | -0.212694 | 1.058747  | 0.273121  |
| C  | -2.369782 | -0.208106 | -0.246086 |
| H  | -3.869040 | 1.316794  | -0.007055 |
| H  | -1.869315 | -0.695438 | -1.085616 |
| C  | -2.146856 | 2.138496  | -0.980497 |
| H  | -2.552344 | 2.961614  | -1.567752 |
| C  | -0.882968 | 2.198757  | -0.539275 |
| O  | -3.884758 | 0.758853  | -1.922526 |
| H  | -3.260746 | 0.564038  | -2.641273 |
| Br | -3.743926 | -1.574134 | 0.266533  |
| C  | -2.073385 | 0.780585  | 2.068126  |
| H  | -2.996096 | 0.237010  | 2.292976  |
| H  | -2.331362 | 1.822061  | 1.852735  |
| H  | -1.458418 | 0.764437  | 2.973043  |
| C  | -0.797395 | -1.256286 | 1.401622  |
| H  | -1.598821 | -1.809812 | 1.894940  |
| H  | 0.002481  | -1.124235 | 2.130858  |
| H  | -0.432180 | -1.893364 | 0.589680  |
| C  | -0.077314 | 3.436239  | -0.892497 |
| H  | 0.031162  | 4.115063  | -0.037689 |
| H  | -0.577620 | 3.995960  | -1.687770 |
| H  | 0.934524  | 3.202100  | -1.244338 |
| C  | 0.688110  | 1.712452  | 1.375004  |
| H  | 1.139059  | 2.611514  | 0.950738  |
| H  | 0.075040  | 2.065960  | 2.208148  |
| C  | 0.734968  | 0.318552  | -0.742350 |
| H  | 1.155100  | 1.058855  | -1.429341 |
| H  | 0.158388  | -0.364075 | -1.372689 |
| C  | 1.846861  | 0.866883  | 1.930917  |
| H  | 2.440052  | 1.485346  | 2.614284  |
| H  | 1.486382  | 0.022387  | 2.521184  |
| C  | 1.913995  | -0.473882 | -0.149058 |
| H  | 1.580988  | -1.376104 | 0.354137  |
| C  | 2.780546  | 0.339260  | 0.821866  |
| Cl | 3.972437  | -0.815124 | 1.640504  |
| C  | 3.613688  | 1.442627  | 0.170360  |
| H  | 4.189628  | 1.975533  | 0.931769  |
| H  | 2.969711  | 2.165858  | -0.341311 |
| H  | 4.301114  | 1.022174  | -0.565604 |
| Br | 2.964807  | -1.201154 | -1.684247 |

SCF Energy (PCM/mPW1PW91/6-31+G\*\*) =  
-6264.56464698

Number of imaginary frequencies = 0

## 1p\_C009

## B3LYP/6-31G\* Geometry

|    |           |           |           |
|----|-----------|-----------|-----------|
| C  | -1.334947 | 0.081313  | 0.881721  |
| C  | -3.123762 | 1.039717  | -0.714080 |
| C  | -0.206287 | 1.056223  | 0.262900  |
| C  | -2.359282 | -0.189378 | -0.248840 |
| H  | -3.815387 | 1.356909  | 0.083780  |
| H  | -1.888733 | -0.660392 | -1.111842 |
| C  | -2.145029 | 2.137574  | -0.992367 |
| H  | -2.544539 | 2.945343  | -1.602504 |
| C  | -0.881203 | 2.192883  | -0.553536 |
| O  | -3.852075 | 0.797442  | -1.910120 |
| H  | -4.481829 | 0.083843  | -1.706389 |
| Br | -3.758976 | -1.561618 | 0.250610  |
| C  | -2.043008 | 0.754181  | 2.080711  |
| H  | -2.969133 | 0.216393  | 2.306305  |
| H  | -2.293236 | 1.801421  | 1.885556  |
| H  | -1.418378 | 0.716818  | 2.978327  |
| C  | -0.786116 | -1.279238 | 1.364934  |
| H  | -1.584615 | -1.836423 | 1.860318  |
| H  | 0.022877  | -1.165835 | 2.087310  |
| H  | -0.434370 | -1.903735 | 0.537630  |
| C  | -0.069899 | 3.422473  | -0.922359 |
| H  | -0.569325 | 3.973920  | -1.723809 |
| H  | 0.939775  | 3.180040  | -1.274329 |
| H  | 0.043671  | 4.111592  | -0.076279 |
| C  | 0.690579  | 1.715047  | 1.363559  |
| H  | 1.143988  | 2.610432  | 0.933976  |
| H  | 0.076215  | 2.076055  | 2.192568  |
| C  | 0.743535  | 0.315723  | -0.750201 |
| H  | 1.163155  | 1.055512  | -1.437511 |
| H  | 0.168291  | -0.366856 | -1.381623 |
| C  | 1.844572  | 0.868994  | 1.927253  |
| H  | 2.434827  | 1.486452  | 2.614053  |
| H  | 1.478781  | 0.025235  | 2.515853  |
| C  | 1.922856  | -0.473715 | -0.152568 |
| H  | 1.590973  | -1.377338 | 0.348595  |
| C  | 2.783621  | 0.340310  | 0.823184  |
| Cl | 3.971311  | -0.813510 | 1.650076  |
| C  | 3.620122  | 1.443432  | 0.175681  |
| H  | 4.189785  | 1.979026  | 0.939977  |
| H  | 2.978745  | 2.164116  | -0.342707 |
| H  | 4.313267  | 1.022108  | -0.554317 |
| Br | 2.982548  | -1.198317 | -1.682587 |

SCF Energy (PCM/mPW1PW91/6-31+G\*\*) =  
-6264.56708913

Number of imaginary frequencies = 0

## 1p\_C010

## B3LYP/6-31G\* Geometry

|    |           |           |           |
|----|-----------|-----------|-----------|
| C  | 1.274870  | -0.279486 | -0.985813 |
| C  | 3.449308  | -1.233712 | 0.122388  |
| C  | 0.449109  | -0.465315 | 0.376990  |
| C  | 2.805679  | -0.146713 | -0.749313 |
| H  | 4.358727  | -0.823778 | 0.569470  |
| H  | 3.311866  | -0.138497 | -1.713937 |
| C  | 2.524418  | -1.717377 | 1.192116  |
| H  | 2.984463  | -2.394987 | 1.909821  |
| C  | 1.215101  | -1.445188 | 1.307120  |
| O  | 3.922848  | -2.323165 | -0.685563 |
| H  | 3.181108  | -2.931662 | -0.824547 |
| Br | 3.390685  | 1.639500  | -0.008712 |
| C  | 0.851380  | 0.909018  | -1.876832 |
| H  | 1.447908  | 0.888512  | -2.797316 |
| H  | 1.034245  | 1.873410  | -1.402900 |
| H  | -0.196329 | 0.852755  | -2.177974 |
| C  | 1.110611  | -1.553335 | -1.872611 |
| H  | 1.878154  | -1.582866 | -2.652245 |
| H  | 0.140667  | -1.547733 | -2.378914 |
| H  | 1.172828  | -2.480955 | -1.295655 |
| C  | 0.470006  | -2.111499 | 2.450644  |
| H  | 1.178927  | -2.550474 | 3.158032  |
| H  | -0.183360 | -2.920385 | 2.100565  |
| H  | -0.161797 | -1.413983 | 3.012537  |
| C  | 0.236182  | 0.847535  | 1.209730  |
| H  | 0.010996  | 0.552285  | 2.240539  |
| H  | 1.168938  | 1.408877  | 1.262700  |
| C  | -0.980283 | -1.068680 | 0.130229  |
| H  | -1.348268 | -1.477890 | 1.071672  |
| H  | -0.941174 | -1.915772 | -0.555503 |
| C  | -0.885541 | 1.790896  | 0.733723  |
| H  | -0.991135 | 2.607840  | 1.456762  |
| H  | -0.628175 | 2.256592  | -0.218359 |
| C  | -2.060144 | -0.096155 | -0.361763 |
| H  | -1.869398 | 0.268199  | -1.367542 |
| C  | -2.255614 | 1.097437  | 0.584459  |
| Cl | -3.382092 | 2.312777  | -0.240938 |
| C  | -2.892138 | 0.753369  | 1.931107  |
| H  | -3.004801 | 1.661427  | 2.529360  |
| H  | -2.262565 | 0.053236  | 2.490764  |
| H  | -3.872625 | 0.294858  | 1.792253  |
| Br | -3.738516 | -1.152520 | -0.613637 |

SCF Energy (PCM/mPW1PW91/6-31+G\*\*) =  
-6264.55883905

Number of imaginary frequencies = 0

## 1p\_C011

## B3LYP/6-31G\* Geometry

|    |           |           |           |
|----|-----------|-----------|-----------|
| C  | 1.260893  | -0.264284 | -0.981230 |
| C  | 3.424408  | -1.269313 | 0.096162  |
| C  | 0.448094  | -0.432590 | 0.392408  |
| C  | 2.794871  | -0.163013 | -0.760931 |
| H  | 4.355717  | -0.885283 | 0.532131  |
| H  | 3.280909  | -0.143367 | -1.737423 |
| C  | 2.513165  | -1.709596 | 1.192532  |
| H  | 2.971291  | -2.388850 | 1.908537  |
| C  | 1.219405  | -1.392748 | 1.336080  |
| O  | 3.724877  | -2.428534 | -0.698549 |
| H  | 4.533565  | -2.238331 | -1.201219 |
| Br | 3.429768  | 1.601391  | -0.002397 |
| C  | 0.853665  | 0.940421  | -1.858385 |
| H  | 1.444841  | 0.918651  | -2.782324 |
| H  | 1.052393  | 1.898351  | -1.377179 |
| H  | -0.195877 | 0.902797  | -2.156100 |
| C  | 1.069677  | -1.529364 | -1.872030 |
| H  | 1.773624  | -1.510795 | -2.710281 |
| H  | 0.063702  | -1.543335 | -2.302468 |
| H  | 1.239221  | -2.459435 | -1.327296 |
| C  | 0.490375  | -2.008637 | 2.518356  |
| H  | 1.210013  | -2.423868 | 3.229192  |
| H  | -0.169932 | -2.828339 | 2.209335  |
| H  | -0.129673 | -1.288786 | 3.064788  |
| C  | 0.225864  | 0.898239  | 1.193782  |
| H  | 0.010710  | 0.627035  | 2.233110  |
| H  | 1.152496  | 1.471729  | 1.227458  |
| C  | -0.976475 | -1.055890 | 0.170778  |
| H  | -1.339754 | -1.429277 | 1.128831  |
| H  | -0.928010 | -1.929298 | -0.479880 |
| C  | -0.909700 | 1.818812  | 0.703276  |
| H  | -1.027467 | 2.644397  | 1.414640  |
| H  | -0.657950 | 2.274737  | -0.254677 |
| C  | -2.060111 | -0.107448 | -0.355416 |
| H  | -1.863736 | 0.232622  | -1.368811 |
| C  | -2.271487 | 1.106709  | 0.561368  |
| Cl | -3.405563 | 2.292636  | -0.297862 |
| C  | -2.912411 | 0.788009  | 1.912199  |
| H  | -3.046381 | 1.709988  | 2.484205  |
| H  | -2.273993 | 0.115630  | 2.495335  |
| H  | -3.883010 | 0.307398  | 1.778760  |
| Br | -3.729726 | -1.181298 | -0.593326 |

SCF Energy (PCM/mPW1PW91/6-31+G\*\*) =  
-6264.55844531

Number of imaginary frequencies = 0

## 1p\_C012

## B3LYP/6-31G\* Geometry

|    |          |          |          |
|----|----------|----------|----------|
| C  | -1.51140 | -0.03416 | 1.16101  |
| C  | -3.06364 | -1.56367 | -0.26687 |
| C  | -0.26252 | -0.30465 | 0.18061  |
| C  | -2.87985 | -0.22272 | 0.45964  |
| H  | -3.78712 | -1.42319 | -1.07442 |
| H  | -3.67736 | -0.11712 | 1.19448  |
| C  | -1.77537 | -2.09126 | -0.81451 |
| H  | -1.88804 | -2.99651 | -1.40954 |
| C  | -0.53709 | -1.60980 | -0.60769 |
| O  | -3.69101 | -2.52946 | 0.59335  |
| H  | -2.99240 | -2.95667 | 1.11228  |
| Br | -3.36667 | 1.24121  | -0.84092 |
| C  | -1.50610 | 1.35449  | 1.83902  |
| H  | -2.29844 | 1.37905  | 2.59692  |
| H  | -1.70908 | 2.16565  | 1.13893  |
| H  | -0.56316 | 1.57047  | 2.34784  |
| C  | -1.49913 | -1.08329 | 2.31922  |
| H  | -2.46962 | -1.11069 | 2.82471  |
| H  | -0.75349 | -0.81866 | 3.07393  |
| H  | -1.26522 | -2.09275 | 1.96920  |
| C  | 0.60289  | -2.37494 | -1.23877 |
| H  | 0.21408  | -3.21852 | -1.81690 |
| H  | 1.29800  | -2.76993 | -0.49306 |
| H  | 1.20261  | -1.75857 | -1.91536 |
| C  | -0.08533 | 0.86324  | -0.85381 |
| H  | -0.74922 | 0.69207  | -1.70274 |
| H  | -0.41752 | 1.79659  | -0.39923 |
| C  | 1.01383  | -0.40226 | 1.11042  |
| H  | 1.14297  | -1.42400 | 1.47525  |
| H  | 0.80381  | 0.19819  | 1.99773  |
| C  | 1.33422  | 1.10752  | -1.38041 |
| H  | 1.69379  | 0.26304  | -1.98156 |
| H  | 1.31789  | 1.97850  | -2.04507 |
| C  | 2.39929  | 0.12601  | 0.66987  |
| H  | 2.96878  | 0.38385  | 1.56100  |
| C  | 2.38165  | 1.32435  | -0.29269 |
| Cl | 1.84793  | 2.76472  | 0.78760  |
| C  | 3.74112  | 1.73422  | -0.85523 |
| H  | 3.64774  | 2.69203  | -1.37416 |
| H  | 4.09709  | 0.98234  | -1.56427 |
| H  | 4.48542  | 1.83843  | -0.06052 |
| Br | 3.58656  | -1.32569 | -0.07823 |

SCF Energy (PCM/mPW1PW91/6-31+G\*\*) =  
-6264.55053192

Number of imaginary frequencies = 0

## 1p\_C013

## B3LYP/6-31G\* Geometry

|    |           |           |           |
|----|-----------|-----------|-----------|
| C  | -1.505960 | -0.052173 | 1.162636  |
| C  | -3.045770 | -1.563603 | -0.298911 |
| C  | -0.253167 | -0.318855 | 0.186246  |
| C  | -2.868198 | -0.231080 | 0.449202  |
| H  | -3.725384 | -1.402388 | -1.145879 |
| H  | -3.662454 | -0.130178 | 1.189904  |
| C  | -1.751404 | -2.112545 | -0.803654 |
| H  | -1.862910 | -3.031117 | -1.376273 |
| C  | -0.517271 | -1.630071 | -0.591994 |
| O  | -3.613052 | -2.562154 | 0.566982  |
| H  | -4.561407 | -2.371321 | 0.650166  |
| Br | -3.367292 | 1.255824  | -0.825762 |
| C  | -1.498328 | 1.333045  | 1.847822  |
| H  | -2.321791 | 1.372309  | 2.571049  |
| H  | -1.647588 | 2.156342  | 1.148274  |
| H  | -0.574918 | 1.520872  | 2.401495  |
| C  | -1.519217 | -1.112063 | 2.308704  |
| H  | -2.446440 | -1.029365 | 2.884839  |
| H  | -0.694275 | -0.936714 | 3.004792  |
| H  | -1.456918 | -2.135432 | 1.937249  |
| C  | 0.628349  | -2.405952 | -1.198815 |
| H  | 0.243555  | -3.253191 | -1.774162 |
| H  | 1.307332  | -2.798997 | -0.437250 |
| H  | 1.243794  | -1.800108 | -1.870780 |
| C  | -0.085827 | 0.842968  | -0.856648 |
| H  | -0.748490 | 0.659047  | -1.704200 |
| H  | -0.423737 | 1.778487  | -0.411268 |
| C  | 1.023385  | -0.403478 | 1.115611  |
| H  | 1.158646  | -1.423406 | 1.482730  |
| H  | 0.810229  | 0.197186  | 2.001876  |
| C  | 1.331463  | 1.092453  | -1.386261 |
| H  | 1.696269  | 0.244751  | -1.979772 |
| H  | 1.309967  | 1.957689  | -2.058337 |
| C  | 2.404069  | 0.133916  | 0.670989  |
| H  | 2.972397  | 0.402193  | 1.559783  |
| C  | 2.376415  | 1.325563  | -0.299510 |
| Cl | 1.828910  | 2.768620  | 0.771430  |
| C  | 3.732198  | 1.744805  | -0.863985 |
| H  | 3.629866  | 2.698206  | -1.389365 |
| H  | 4.095803  | 0.991467  | -1.567550 |
| H  | 4.474925  | 1.861431  | -0.069513 |
| Br | 3.604208  | -1.311671 | -0.069854 |

SCF Energy (PCM/mPW1PW91/6-31+G\*\*) =  
-6264.54990660

Number of imaginary frequencies = 0

## 1p\_C014

## B3LYP/6-31G\* Geometry

|    |           |           |           |
|----|-----------|-----------|-----------|
| C  | -1.511384 | -0.033743 | 1.161020  |
| C  | -3.063890 | -1.563579 | -0.266297 |
| C  | -0.262609 | -0.304558 | 0.180624  |
| C  | -2.879923 | -0.222451 | 0.459772  |
| H  | -3.787707 | -1.423394 | -1.073572 |
| H  | -3.677406 | -0.116390 | 1.194592  |
| C  | -1.775773 | -2.091186 | -0.814231 |
| H  | -1.888459 | -2.996389 | -1.409315 |
| C  | -0.537463 | -1.609686 | -0.607586 |
| O  | -3.690853 | -2.529214 | 0.594458  |
| H  | -2.991973 | -2.956366 | 1.113085  |
| Br | -3.366434 | 1.241024  | -0.841396 |
| C  | -1.505941 | 1.355108  | 1.838614  |
| H  | -2.297954 | 1.379828  | 2.596850  |
| H  | -1.709251 | 2.166068  | 1.138380  |
| H  | -0.562788 | 1.571264  | 2.346974  |
| C  | -1.499071 | -1.082483 | 2.319611  |
| H  | -2.469738 | -1.110162 | 2.824744  |
| H  | -0.753842 | -0.817323 | 3.074543  |
| H  | -1.264563 | -2.091946 | 1.969991  |
| C  | 0.602438  | -2.374742 | -1.238911 |
| H  | 0.213678  | -3.218294 | -1.817084 |
| H  | 1.297678  | -2.769707 | -0.493312 |
| H  | 1.201969  | -1.758203 | -1.915521 |
| C  | -0.085107 | 0.863214  | -0.853921 |
| H  | -0.748793 | 0.691984  | -1.703016 |
| H  | -0.417379 | 1.796614  | -0.399510 |
| C  | 1.013737  | -0.402317 | 1.110469  |
| H  | 1.142730  | -1.424069 | 1.475339  |
| H  | 0.803743  | 0.198231  | 1.997720  |
| C  | 1.334542  | 1.107463  | -1.380295 |
| H  | 1.694159  | 0.263018  | -1.981434 |
| H  | 1.318219  | 1.978474  | -2.044926 |
| C  | 2.399285  | 0.125753  | 0.669953  |
| H  | 2.968836  | 0.383374  | 1.561130  |
| C  | 2.381836  | 1.324250  | -0.292452 |
| Cl | 1.848214  | 2.764587  | 0.787772  |
| C  | 3.741458  | 1.733881  | -0.854860 |
| H  | 3.648286  | 2.691633  | -1.373911 |
| H  | 4.097501  | 0.981875  | -1.563728 |
| H  | 4.485598  | 1.838121  | -0.059993 |
| Br | 3.586201  | -1.325940 | -0.078458 |

SCF Energy (PCM/mPW1PW91/6-31+G\*\*) =  
-6264.55053288

Number of imaginary frequencies = 0

**1p\_C015****B3LYP/6-31G\* Geometry**

|    |           |           |           |
|----|-----------|-----------|-----------|
| C  | 1.335466  | 0.382834  | 1.101070  |
| C  | 3.211959  | 0.871849  | -0.704944 |
| C  | 0.369363  | 0.807307  | -0.093244 |
| C  | 2.765348  | 0.085774  | 0.559662  |
| H  | 3.167583  | 0.185744  | -1.563278 |
| H  | 3.486539  | 0.301336  | 1.346706  |
| C  | 2.323468  | 2.046434  | -0.993917 |
| H  | 2.819986  | 2.894271  | -1.460226 |
| C  | 1.004695  | 2.053998  | -0.756484 |
| O  | 4.547718  | 1.344557  | -0.560972 |
| H  | 5.124675  | 0.563198  | -0.573591 |
| Br | 3.165038  | -1.860465 | 0.198983  |
| C  | 0.783040  | -0.789744 | 1.939189  |
| H  | 1.515841  | -1.084782 | 2.697113  |
| H  | 0.566071  | -1.680984 | 1.347156  |
| H  | -0.127271 | -0.488561 | 2.467936  |
| C  | 1.536929  | 1.564590  | 2.095155  |
| H  | 2.123766  | 1.221564  | 2.954416  |
| H  | 0.581006  | 1.929096  | 2.484171  |
| H  | 2.062165  | 2.408132  | 1.642910  |
| C  | 0.193323  | 3.277060  | -1.113054 |
| H  | 0.827111  | 4.020113  | -1.606289 |
| H  | -0.245361 | 3.753080  | -0.226386 |
| H  | -0.638201 | 3.050583  | -1.793212 |
| C  | 0.262828  | -0.327751 | -1.173256 |
| H  | 1.137537  | -0.312269 | -1.826157 |
| H  | 0.257862  | -1.316755 | -0.704915 |
| C  | -1.080827 | 1.093268  | 0.435644  |
| H  | -1.522230 | 1.951262  | -0.075542 |
| H  | -1.068892 | 1.358967  | 1.493539  |
| C  | -0.996408 | -0.173295 | -2.031715 |
| H  | -1.023759 | 0.837017  | -2.459546 |
| H  | -0.977078 | -0.865303 | -2.877913 |
| C  | -2.022484 | -0.100781 | 0.248941  |
| H  | -1.607795 | -0.992559 | 0.708935  |
| C  | -2.312951 | -0.386749 | -1.238565 |
| Cl | -2.784139 | -2.179577 | -1.361218 |
| C  | -3.452218 | 0.418727  | -1.858482 |
| H  | -3.513606 | 0.206358  | -2.929953 |
| H  | -3.260207 | 1.491260  | -1.730477 |
| H  | -4.409615 | 0.184014  | -1.392362 |
| Br | -3.675229 | 0.195906  | 1.321287  |

SCF Energy (PCM/mPW1PW91/6-31+G\*\*) =  
-6264.55843754

Number of imaginary frequencies = 0

**1p\_C016****B3LYP/6-31G\* Geometry**

|    |           |           |           |
|----|-----------|-----------|-----------|
| C  | 1.366189  | -0.516649 | -1.004009 |
| C  | 3.454467  | -0.850721 | 0.529312  |
| C  | 0.437084  | -0.651508 | 0.287659  |
| C  | 2.803515  | -0.071998 | -0.632129 |
| H  | 4.018131  | -0.148024 | 1.157084  |
| H  | 3.447029  | -0.196709 | -1.501416 |
| C  | 2.475802  | -1.616913 | 1.375540  |
| H  | 2.942961  | -2.266815 | 2.117721  |
| C  | 1.139540  | -1.612798 | 1.273758  |
| O  | 4.382404  | -1.757083 | -0.099817 |
| H  | 4.771455  | -2.309967 | 0.596845  |
| Br | 3.019422  | 1.900356  | -0.295360 |
| C  | 0.782372  | 0.418295  | -2.083232 |
| H  | 1.495788  | 0.512865  | -2.909738 |
| H  | 0.583985  | 1.429051  | -1.721483 |
| H  | -0.140508 | 0.004410  | -2.502698 |
| C  | 1.567571  | -1.901079 | -1.693070 |
| H  | 2.187648  | -1.775619 | -2.586884 |
| H  | 0.614459  | -2.323643 | -2.023632 |
| H  | 2.064656  | -2.626413 | -1.048427 |
| C  | 0.350386  | -2.557539 | 2.154707  |
| H  | 1.012292  | -3.043745 | 2.877580  |
| H  | -0.127871 | -3.350936 | 1.565552  |
| H  | -0.446285 | -2.061753 | 2.720727  |
| C  | 0.239771  | 0.724014  | 1.029095  |
| H  | 1.108058  | 0.934997  | 1.655145  |
| H  | 0.187144  | 1.543532  | 0.308312  |
| C  | -0.992779 | -1.165446 | -0.115791 |
| H  | -1.385115 | -1.860529 | 0.629722  |
| H  | -0.960623 | -1.728287 | -1.048542 |
| C  | -1.029190 | 0.760025  | 1.886535  |
| H  | -1.025775 | -0.068853 | 2.603068  |
| H  | -1.056939 | 1.676506  | 2.482347  |
| C  | -2.006003 | -0.026413 | -0.279166 |
| H  | -1.637543 | 0.717261  | -0.979098 |
| C  | -2.338572 | 0.663308  | 1.059669  |
| Cl | -2.901453 | 2.386874  | 0.650862  |
| C  | -3.449394 | 0.015626  | 1.882766  |
| H  | -3.540551 | 0.527126  | 2.845598  |
| H  | -3.204278 | -1.036683 | 2.072904  |
| H  | -4.408095 | 0.055948  | 1.364884  |
| Br | -3.620539 | -0.722788 | -1.218114 |

SCF Energy (PCM/mPW1PW91/6-31+G\*\*) =  
-6264.55383500

Number of imaginary frequencies = 0

**1p\_C017****B3LYP/6-31G\* Geometry**

|    |           |           |           |
|----|-----------|-----------|-----------|
| C  | 1.357583  | -0.541696 | -0.983573 |
| C  | 3.485423  | -0.884870 | 0.499733  |
| C  | 0.446305  | -0.590045 | 0.327931  |
| C  | 2.812026  | -0.113162 | -0.657720 |
| H  | 4.152150  | -0.201693 | 1.032226  |
| H  | 3.432036  | -0.244801 | -1.543202 |
| C  | 2.507099  | -1.509763 | 1.450819  |
| H  | 2.980291  | -2.104878 | 2.230665  |
| C  | 1.167133  | -1.471070 | 1.377704  |
| O  | 4.370070  | -1.891317 | -0.017961 |
| H  | 3.828414  | -2.656231 | -0.268711 |
| Br | 3.053022  | 1.863006  | -0.341909 |
| C  | 0.794000  | 0.351066  | -2.108897 |
| H  | 1.483723  | 0.336745  | -2.961136 |
| H  | 0.678760  | 1.395457  | -1.813735 |
| H  | -0.167393 | -0.026029 | -2.471743 |
| C  | 1.490469  | -1.968967 | -1.603906 |
| H  | 2.284262  | -1.981998 | -2.358398 |
| H  | 0.569686  | -2.263631 | -2.115267 |
| H  | 1.710197  | -2.736994 | -0.857544 |
| C  | 0.381744  | -2.304465 | 2.369940  |
| H  | 1.051239  | -2.721558 | 3.127838  |
| H  | -0.120293 | -3.148749 | 1.879241  |
| H  | -0.396344 | -1.739036 | 2.893907  |
| C  | 0.231927  | 0.833831  | 0.968038  |
| H  | 1.094909  | 1.097062  | 1.580851  |
| H  | 0.178013  | 1.597089  | 0.187833  |
| C  | -0.979524 | -1.154586 | -0.020514 |
| H  | -1.359054 | -1.783249 | 0.787521  |
| H  | -0.944575 | -1.800344 | -0.897671 |
| C  | -1.041973 | 0.928267  | 1.814508  |
| H  | -1.031522 | 0.165401  | 2.600244  |
| H  | -1.079612 | 1.892763  | 2.328237  |
| C  | -2.009011 | -0.048123 | -0.277652 |
| H  | -1.652685 | 0.641733  | -1.036369 |
| C  | -2.350086 | 0.745993  | 0.999373  |
| Cl | -2.937569 | 2.421028  | 0.449485  |
| C  | -3.451136 | 0.153625  | 1.875952  |
| H  | -3.547952 | 0.742203  | 2.793030  |
| H  | -3.190975 | -0.875597 | 2.152710  |
| H  | -4.411150 | 0.137461  | 1.359095  |
| Br | -3.613476 | -0.843128 | -1.152879 |

**SCF Energy (PCM/mPW1PW91/6-31+G\*\*) =  
-6264.55471525**

**Number of imaginary frequencies = 0**

**2a\_C001****B3LYP/6-31G\* Geometry**

|    |           |           |           |
|----|-----------|-----------|-----------|
| C  | -0.397120 | 1.367775  | -1.155147 |
| C  | 1.533622  | 0.136570  | -0.065899 |
| C  | -0.755700 | -0.166344 | 0.904960  |
| C  | 0.598822  | -0.888361 | 0.615255  |
| C  | -1.335038 | 0.560353  | -0.287482 |
| C  | 0.969746  | 0.705188  | -1.363931 |
| H  | -1.450784 | -0.926774 | 1.258921  |
| H  | 1.665390  | 1.426779  | -1.798131 |
| H  | -0.864434 | 1.556355  | -2.122382 |
| H  | 1.773386  | 0.937779  | 0.634446  |
| H  | 0.846031  | -0.101181 | -2.095902 |
| Cl | -0.155447 | 3.069290  | -0.465765 |
| Br | 3.320722  | -0.654588 | -0.481153 |
| C  | 0.267515  | -2.084459 | -0.309845 |
| H  | -0.344239 | -1.805102 | -1.172741 |
| H  | -0.285003 | -2.846830 | 0.249396  |
| H  | 1.194483  | -2.534213 | -0.676636 |
| C  | 1.215904  | -1.435241 | 1.914239  |
| H  | 2.064671  | -2.081994 | 1.678374  |
| H  | 0.477370  | -2.024872 | 2.469102  |
| H  | 1.567898  | -0.633061 | 2.567451  |
| Cl | -0.646113 | 0.999769  | 2.338655  |
| C  | -2.632970 | 0.490048  | -0.632322 |
| H  | -2.953644 | 1.009370  | -1.534183 |
| C  | -3.725755 | -0.214304 | 0.098106  |
| H  | -3.448108 | -0.554182 | 1.094260  |
| H  | -4.610923 | 0.419653  | 0.176783  |
| Cl | -4.274412 | -1.701914 | -0.825598 |

**SCF Energy (PCM/mPW1PW91/6-31+G\*\*) =  
-4341.95069880**

**Number of imaginary frequencies = 0**

**2a\_C002****B3LYP/6-31G\* Geometry**

|    |           |           |           |
|----|-----------|-----------|-----------|
| C  | -0.434366 | 1.486628  | -0.751790 |
| C  | 1.615371  | 0.230366  | 0.058852  |
| C  | -0.633308 | -0.807080 | 0.436641  |
| C  | 0.863263  | -1.119343 | 0.112664  |
| C  | -1.247408 | 0.244922  | -0.459805 |
| C  | 1.055649  | 1.199882  | -0.977590 |
| H  | -1.179239 | -1.745814 | 0.353341  |
| H  | 1.617116  | 2.136752  | -0.964219 |
| H  | -0.844310 | 1.993541  | -1.626077 |
| H  | 1.621064  | 0.687347  | 1.049082  |
| H  | 1.169625  | 0.772167  | -1.980528 |
| Cl | -0.621036 | 2.745605  | 0.590158  |

|    |           |           |           |
|----|-----------|-----------|-----------|
| Br | 3.557032  | -0.022216 | -0.339283 |
| C  | 0.878268  | -1.849048 | -1.251611 |
| H  | 0.322613  | -1.315377 | -2.028509 |
| H  | 0.433007  | -2.844773 | -1.149164 |
| H  | 1.910037  | -1.971089 | -1.592700 |
| C  | 1.467980  | -2.058769 | 1.170858  |
| H  | 2.454388  | -2.399406 | 0.846056  |
| H  | 0.828532  | -2.937791 | 1.310952  |
| H  | 1.578212  | -1.564097 | 2.138765  |
| Cl | -0.888706 | -0.334565 | 2.204704  |
| C  | -2.444329 | 0.108451  | -1.057433 |
| H  | -2.787223 | 0.914548  | -1.704627 |
| C  | -3.407882 | -1.026729 | -0.939764 |
| H  | -3.600248 | -1.488160 | -1.911795 |
| H  | -3.103865 | -1.796299 | -0.232288 |
| Cl | -5.031155 | -0.418078 | -0.364245 |

**SCF Energy (PCM/mPW1PW91/6-31+G\*\*) =  
-4341.94945428**

**Number of imaginary frequencies = 0**

**2b\_C001**

**B3LYP/6-31G\* Geometry**

|    |           |           |           |
|----|-----------|-----------|-----------|
| C  | 0.924839  | -0.077654 | 1.164690  |
| C  | -1.474658 | -0.036955 | 0.304365  |
| C  | 0.309005  | 0.925934  | -1.146588 |
| C  | -1.028339 | 0.125001  | -1.166146 |
| C  | 1.359693  | 0.370796  | -0.210249 |
| C  | -0.451068 | -0.760204 | 1.173665  |
| H  | 0.706788  | 0.951386  | -2.162683 |
| H  | -0.810886 | -0.837077 | 2.202116  |
| H  | 1.652390  | -0.768740 | 1.587369  |
| H  | -1.718238 | 0.939882  | 0.723928  |
| H  | -0.317265 | -1.784062 | 0.805917  |
| Cl | 0.935304  | 1.332209  | 2.362805  |
| Br | -3.198304 | -1.036913 | 0.450187  |
| C  | -0.721489 | -1.234656 | -1.838325 |
| H  | 0.148682  | -1.740492 | -1.409673 |
| H  | -0.524065 | -1.087269 | -2.905533 |
| H  | -1.586462 | -1.896659 | -1.739277 |
| C  | -2.095870 | 0.851241  | -2.002931 |
| H  | -2.961448 | 0.200061  | -2.148648 |
| H  | -1.693823 | 1.115743  | -2.987512 |
| H  | -2.436007 | 1.769755  | -1.518809 |
| Cl | 0.041319  | 2.718320  | -0.757786 |
| C  | 2.626498  | 0.262778  | -0.648065 |
| H  | 2.844731  | 0.555181  | -1.673896 |
| C  | 3.809167  | -0.201946 | 0.132276  |
| H  | 3.627050  | -0.292708 | 1.201694  |

|    |          |           |           |
|----|----------|-----------|-----------|
| H  | 4.662215 | 0.460999  | -0.023896 |
| Cl | 4.364572 | -1.852884 | -0.445242 |

**SCF Energy (PCM/mPW1PW91/6-31+G\*\*) =  
-4341.95085642**

**Number of imaginary frequencies = 0**

**2b\_C002**

**B3LYP/6-31G\* Geometry**

|    |           |           |           |
|----|-----------|-----------|-----------|
| C  | 0.782156  | -1.214873 | -0.070197 |
| C  | -1.575087 | -0.272813 | 0.157219  |
| C  | 0.330737  | 1.333479  | 0.070309  |
| C  | -1.153891 | 1.121579  | -0.358320 |
| C  | 1.259033  | 0.198763  | -0.309833 |
| C  | -0.709819 | -1.408460 | -0.379858 |
| H  | 0.686578  | 2.259311  | -0.385187 |
| H  | -1.043724 | -2.365533 | 0.027178  |
| H  | 1.351498  | -1.920299 | -0.672944 |
| H  | -1.581605 | -0.274540 | 1.247779  |
| H  | -0.821880 | -1.468627 | -1.468833 |
| Cl | 1.138703  | -1.759565 | 1.658816  |
| Br | -3.471184 | -0.692561 | -0.312108 |
| C  | -1.189279 | 1.210409  | -1.902494 |
| H  | -0.442836 | 0.573370  | -2.386131 |
| H  | -1.000051 | 2.241028  | -2.221631 |
| H  | -2.177994 | 0.916798  | -2.266207 |
| C  | -2.057795 | 2.229574  | 0.210831  |
| H  | -3.052864 | 2.167486  | -0.237391 |
| H  | -1.638992 | 3.216681  | -0.015750 |
| H  | -2.165678 | 2.149889  | 1.295110  |
| Cl | 0.488186  | 1.672232  | 1.882824  |
| C  | 2.434159  | 0.496783  | -0.891417 |
| H  | 2.675020  | 1.546481  | -1.052690 |
| C  | 3.499405  | -0.447868 | -1.343163 |
| H  | 3.700682  | -0.340349 | -2.412144 |
| H  | 3.290660  | -1.493033 | -1.120751 |
| Cl | 5.078694  | -0.056696 | -0.512527 |

**SCF Energy (PCM/mPW1PW91/6-31+G\*\*) =  
-4341.94950874**

**Number of imaginary frequencies = 0**

**2c\_C001**

**B3LYP/6-31G\* Geometry**

|   |          |          |          |
|---|----------|----------|----------|
| C | -0.14450 | 1.44752  | -0.99747 |
| C | 1.35710  | -0.67043 | -1.08666 |
| C | -0.62880 | -0.57200 | 0.56608  |
| C | 0.28320  | -1.47452 | -0.31392 |
| C | -1.11877 | 0.67143  | -0.14138 |
| C | 0.80188  | 0.55748  | -1.81168 |

|    |          |          |          |
|----|----------|----------|----------|
| H  | -1.48009 | -1.18588 | 0.85761  |
| H  | 1.61687  | 1.15619  | -2.22451 |
| H  | -0.70520 | 2.07864  | -1.68818 |
| H  | 1.81705  | -1.33381 | -1.82030 |
| H  | 0.21648  | 0.18997  | -2.66642 |
| Cl | 0.78595  | 2.68038  | 0.01162  |
| Br | 2.93879  | -0.15586 | 0.02438  |
| C  | -0.65952 | -2.11398 | -1.37665 |
| H  | -1.24496 | -1.37852 | -1.93503 |
| H  | -1.36785 | -2.78984 | -0.88618 |
| H  | -0.07756 | -2.70580 | -2.09166 |
| C  | 0.89945  | -2.62596 | 0.49722  |
| H  | 1.42113  | -3.31569 | -0.17650 |
| H  | 0.11469  | -3.18919 | 1.01456  |
| H  | 1.61431  | -2.26697 | 1.23715  |
| Cl | 0.10838  | -0.11211 | 2.19403  |
| C  | -2.39559 | 1.08958  | -0.08224 |
| H  | -2.67796 | 1.96477  | -0.66549 |
| C  | -3.50004 | 0.49668  | 0.72513  |
| H  | -3.16516 | -0.20024 | 1.49142  |
| H  | -4.09983 | 1.27687  | 1.19664  |
| Cl | -4.67115 | -0.43182 | -0.34490 |

**SCF Energy (PCM/mPW1PW91/6-31+G\*\*) =  
-4341.94416274**

**Number of imaginary frequencies = 0**

**2c\_C002**

**B3LYP/6-31G\* Geometry**

|    |           |           |           |
|----|-----------|-----------|-----------|
| C  | -0.246847 | -1.173855 | 1.240947  |
| C  | 1.748660  | 0.468389  | 0.955037  |
| C  | -0.491792 | 0.937617  | -0.248575 |
| C  | 0.789392  | 1.546384  | 0.392417  |
| C  | -1.139921 | -0.134843 | 0.598944  |
| C  | 1.052690  | -0.592745 | 1.811367  |
| H  | -1.186002 | 1.764203  | -0.393873 |
| H  | 1.748637  | -1.398764 | 2.054304  |
| H  | -0.792923 | -1.655736 | 2.052891  |
| H  | 2.504910  | 0.968600  | 1.561530  |
| H  | 0.782977  | -0.113804 | 2.763787  |
| Cl | 0.084316  | -2.575161 | 0.090813  |
| Br | 2.884243  | -0.414315 | -0.435049 |
| C  | 0.293484  | 2.389824  | 1.604219  |
| H  | -0.324782 | 1.817840  | 2.301659  |
| H  | -0.304659 | 3.235755  | 1.247850  |
| H  | 1.145907  | 2.799391  | 2.157154  |
| C  | 1.505395  | 2.508792  | -0.568895 |
| H  | 2.324877  | 3.015521  | -0.046032 |
| H  | 0.809221  | 3.275207  | -0.928157 |

|    |           |           |           |
|----|-----------|-----------|-----------|
| H  | 1.921310  | 1.987451  | -1.430473 |
| Cl | -0.247955 | 0.315658  | -1.964396 |
| C  | -2.458024 | -0.176744 | 0.862507  |
| H  | -2.826058 | -0.976078 | 1.504241  |
| C  | -3.526957 | 0.739719  | 0.364193  |
| H  | -4.044969 | 1.234233  | 1.190105  |
| H  | -3.176304 | 1.492321  | -0.339997 |
| Cl | -4.817956 | -0.212282 | -0.511195 |

**SCF Energy (PCM/mPW1PW91/6-31+G\*\*) =  
-4341.94269525**

**Number of imaginary frequencies = 0**

**2c\_C003**

**B3LYP/6-31G\* Geometry**

|    |           |           |           |
|----|-----------|-----------|-----------|
| C  | -0.282005 | 1.572540  | -1.088772 |
| C  | 1.714349  | 0.198808  | -0.405018 |
| C  | -0.360783 | -0.865610 | -1.167627 |
| C  | 0.871682  | -1.098709 | -0.219765 |
| C  | -1.168232 | 0.367185  | -0.785843 |
| C  | 0.968250  | 1.517963  | -0.191495 |
| H  | 0.035190  | -0.699481 | -2.175595 |
| H  | 0.659384  | 1.621698  | 0.852695  |
| H  | 0.017121  | 1.554119  | -2.142139 |
| H  | 2.159977  | 0.184727  | -1.403376 |
| H  | 1.632040  | 2.354521  | -0.425066 |
| Cl | -1.077590 | 3.193945  | -0.888822 |
| Br | 3.318552  | 0.217592  | 0.783570  |
| C  | 1.700767  | -2.300987 | -0.707027 |
| H  | 1.944146  | -2.213018 | -1.773297 |
| H  | 1.159566  | -3.238079 | -0.560142 |
| H  | 2.639355  | -2.351682 | -0.148869 |
| C  | 0.423671  | -1.319222 | 1.233513  |
| H  | 1.296550  | -1.452128 | 1.877475  |
| H  | -0.191362 | -2.221683 | 1.301412  |
| H  | -0.163104 | -0.482564 | 1.622784  |
| Cl | -1.345894 | -2.388357 | -1.402615 |
| C  | -2.368410 | 0.494654  | -0.205964 |
| H  | -2.720201 | 1.510610  | -0.050952 |
| C  | -3.333259 | -0.537156 | 0.288966  |
| H  | -4.258223 | -0.527365 | -0.293234 |
| H  | -2.942245 | -1.546455 | 0.329948  |
| Cl | -3.836145 | -0.116513 | 2.000708  |

**SCF Energy (PCM/mPW1PW91/6-31+G\*\*) =  
-4341.94182893**

**Number of imaginary frequencies = 0**

**2c\_C004**

**B3LYP/6-31G\* Geometry**

|   |           |          |           |
|---|-----------|----------|-----------|
| C | -0.371751 | 1.086850 | -1.463470 |
|---|-----------|----------|-----------|



|    |           |           |           |
|----|-----------|-----------|-----------|
| C  | 1.283480  | -0.522633 | -0.381434 |
| C  | -0.717543 | 0.053710  | 0.910031  |
| C  | 0.845508  | -0.059141 | 1.029816  |
| C  | -1.268347 | 0.412152  | -0.458205 |
| C  | 1.077877  | 0.537925  | -1.465733 |
| H  | -1.125916 | -0.920021 | 1.183640  |
| H  | 1.791706  | 1.350766  | -1.324424 |
| H  | -0.812409 | 0.982472  | -2.454139 |
| H  | 0.764959  | -1.449113 | -0.641168 |
| H  | 1.293282  | 0.096087  | -2.443112 |
| Cl | -0.381442 | 2.924169  | -1.214414 |
| Br | 3.202635  | -1.067641 | -0.440241 |
| C  | 1.150398  | -1.135237 | 2.089556  |
| H  | 0.781662  | -2.121071 | 1.780276  |
| H  | 0.670723  | -0.870788 | 3.037764  |
| H  | 2.226460  | -1.218773 | 2.259524  |
| C  | 1.547522  | 1.253040  | 1.429685  |
| H  | 2.626365  | 1.135157  | 1.287597  |
| H  | 1.363512  | 1.474295  | 2.483287  |
| H  | 1.210198  | 2.113270  | 0.848175  |
| Cl | -1.422088 | 1.163619  | 2.208496  |
| C  | -2.509708 | 0.065563  | -0.842817 |
| H  | -2.823273 | 0.304566  | -1.857703 |
| C  | -3.549977 | -0.608610 | -0.013812 |
| H  | -3.269337 | -0.743563 | 1.028564  |
| H  | -4.495805 | -0.064345 | -0.055535 |
| Cl | -3.915241 | -2.276212 | -0.683846 |

**SCF Energy (PCM/mPW1PW91/6-31+G\*\*) =  
-4341.94082416**

**Number of imaginary frequencies = 0**

**2c\_C005**

**B3LYP/6-31G\* Geometry**

|    |           |           |           |
|----|-----------|-----------|-----------|
| C  | -0.247585 | 1.612001  | -0.779098 |
| C  | 1.779566  | 0.152391  | -0.460376 |
| C  | -0.445482 | -0.821339 | -0.824313 |
| C  | 0.927920  | -1.104057 | -0.113406 |
| C  | -1.120434 | 0.446655  | -0.318137 |
| C  | 1.143391  | 1.503644  | -0.127702 |
| H  | -0.229457 | -0.670661 | -1.887799 |
| H  | 1.039678  | 1.624731  | 0.954512  |
| H  | -0.148604 | 1.582986  | -1.869440 |
| H  | 2.035601  | 0.117069  | -1.522771 |
| H  | 1.788020  | 2.309387  | -0.488528 |
| Cl | -0.919402 | 3.267865  | -0.446920 |
| Br | 3.571438  | 0.100175  | 0.419397  |
| C  | 1.600245  | -2.345329 | -0.728260 |
| H  | 1.639480  | -2.276716 | -1.822530 |

|    |           |           |           |
|----|-----------|-----------|-----------|
| H  | 1.057481  | -3.256163 | -0.467171 |
| H  | 2.625050  | -2.433324 | -0.357573 |
| C  | 0.742515  | -1.298858 | 1.399865  |
| H  | 1.706959  | -1.495690 | 1.874465  |
| H  | 0.087137  | -2.154839 | 1.588069  |
| H  | 0.300596  | -0.421458 | 1.880695  |
| Cl | -1.511175 | -2.302964 | -0.866989 |
| C  | -2.195927 | 0.633167  | 0.459520  |
| H  | -2.466092 | 1.666490  | 0.657934  |
| C  | -3.098753 | -0.344612 | 1.137223  |
| H  | -2.808882 | -1.383855 | 1.036117  |
| H  | -3.189625 | -0.089061 | 2.195629  |
| Cl | -4.801799 | -0.213547 | 0.471414  |

**SCF Energy (PCM/mPW1PW91/6-31+G\*\*) =  
-4341.95069880**

**Number of imaginary frequencies = 0**

**2d\_C001**

**B3LYP/6-31G\* Geometry**

|    |           |           |           |
|----|-----------|-----------|-----------|
| C  | -0.016877 | 1.561504  | 0.079447  |
| C  | 1.437364  | -0.105142 | -1.143099 |
| C  | -0.418496 | -0.900155 | 0.470015  |
| C  | 0.495243  | -1.264302 | -0.737722 |
| C  | -1.035988 | 0.479490  | 0.380776  |
| C  | 0.748626  | 1.259627  | -1.214551 |
| H  | -1.195726 | -1.660662 | 0.517861  |
| H  | 1.491045  | 2.039858  | -1.396086 |
| H  | 0.695912  | 1.615180  | 0.906971  |
| H  | 1.896910  | -0.342078 | -2.103496 |
| H  | 0.048211  | 1.268416  | -2.057994 |
| Cl | -0.719949 | 3.236346  | -0.030998 |
| Br | 3.043461  | 0.083614  | 0.048198  |
| C  | -0.469028 | -1.497905 | -1.938329 |
| H  | -1.138673 | -0.654588 | -2.124634 |
| H  | -1.094236 | -2.376336 | -1.747744 |
| H  | 0.106118  | -1.691145 | -2.850468 |
| C  | 1.260731  | -2.576374 | -0.500662 |
| H  | 1.790763  | -2.867005 | -1.414977 |
| H  | 0.563100  | -3.381968 | -0.246206 |
| H  | 1.992065  | -2.484586 | 0.302492  |
| Cl | 0.408236  | -1.059551 | 2.119636  |
| C  | -2.348354 | 0.703662  | 0.547085  |
| H  | -2.717011 | 1.716945  | 0.421760  |
| C  | -3.384287 | -0.306848 | 0.910758  |
| H  | -2.984452 | -1.220702 | 1.347514  |
| H  | -4.115511 | 0.119059  | 1.599126  |
| Cl | -4.363183 | -0.831396 | -0.557070 |

**SCF Energy (PCM/mPW1PW91/6-31+G\*\*) =  
-4341.94905315**

Number of imaginary frequencies = 0

2d\_C002

B3LYP/6-31G\* Geometry

|    |           |           |           |
|----|-----------|-----------|-----------|
| C  | 0.266436  | 1.825250  | -0.517055 |
| C  | -1.651753 | 0.251277  | 0.011618  |
| C  | 0.498720  | 0.022709  | 1.187614  |
| C  | -0.709780 | -0.820223 | 0.638484  |
| C  | 1.204869  | 0.812465  | 0.102016  |
| C  | -1.008753 | 1.152257  | -1.039310 |
| H  | 0.096683  | 0.749887  | 1.898161  |
| H  | -0.725394 | 0.558728  | -1.916516 |
| H  | 0.760802  | 2.361600  | -1.326644 |
| H  | -2.079889 | 0.860374  | 0.809637  |
| H  | -1.723782 | 1.907675  | -1.375142 |
| Cl | -0.173480 | 3.163735  | 0.689870  |
| Br | -3.265914 | -0.578519 | -0.823702 |
| C  | -1.446014 | -1.505775 | 1.804755  |
| H  | -1.706973 | -0.783924 | 2.588381  |
| H  | -0.828609 | -2.286180 | 2.254512  |
| H  | -2.371146 | -1.962036 | 1.442884  |
| C  | -0.239062 | -1.870051 | -0.380759 |
| H  | -1.098335 | -2.411401 | -0.784519 |
| H  | 0.424654  | -2.591351 | 0.105156  |
| H  | 0.307329  | -1.425985 | -1.218457 |
| Cl | 1.602749  | -0.980492 | 2.245251  |
| C  | 2.435790  | 0.723679  | -0.428745 |
| H  | 2.681932  | 1.462723  | -1.190200 |
| C  | 3.561368  | -0.230004 | -0.176606 |
| H  | 4.413063  | 0.276509  | 0.285068  |
| H  | 3.293881  | -1.099565 | 0.411239  |
| Cl | 4.182016  | -0.861973 | -1.780183 |

SCF Energy (PCM/mPW1PW91/6-31+G\*\*) =  
-4341.94565429

Number of imaginary frequencies = 0

2d\_C003

B3LYP/6-31G\* Geometry

|   |           |           |           |
|---|-----------|-----------|-----------|
| C | 0.130702  | 1.367775  | -1.155147 |
| C | -1.787441 | 0.136570  | -0.065899 |
| C | 0.350111  | -0.166344 | 0.904960  |
| C | -0.902244 | -0.888361 | 0.615255  |
| C | 1.070040  | 0.560353  | -0.287482 |
| C | -1.001033 | 0.705188  | -1.363931 |
| H | 1.015345  | -0.926774 | 1.258921  |
| H | -1.675511 | 1.426779  | -1.798131 |
| H | -0.302065 | 1.556355  | -2.122382 |
| H | -2.513816 | 0.937779  | 0.634446  |

|    |           |           |           |
|----|-----------|-----------|-----------|
| H  | -0.572059 | -0.101181 | -2.095902 |
| Cl | 0.944841  | 3.069290  | -0.465765 |
| Br | -2.978492 | -0.654588 | -0.481153 |
| C  | -0.348366 | -2.084459 | -0.309845 |
| H  | 0.316527  | -1.805102 | -1.172741 |
| H  | 0.214190  | -2.846830 | 0.249396  |
| H  | -1.173543 | -2.534213 | -0.676636 |
| C  | -1.706730 | -1.435241 | 1.914239  |
| H  | -2.505813 | -2.081994 | 1.678374  |
| H  | -1.057796 | -2.024872 | 2.469102  |
| H  | -2.161926 | -0.633061 | 2.567451  |
| Cl | -0.000045 | 0.999769  | 2.338655  |
| C  | 2.383352  | 0.490048  | -0.632322 |
| H  | 2.802489  | 1.009370  | -1.534183 |
| C  | 3.378219  | -0.214304 | 0.098106  |
| H  | 3.909694  | -0.554182 | 1.094260  |
| H  | 2.963428  | 0.419653  | 0.176783  |
| Cl | 4.678053  | -1.701914 | -0.825598 |

SCF Energy (PCM/mPW1PW91/6-31+G\*\*) =  
-4341.94815150

Number of imaginary frequencies = 0

2d\_C004

B3LYP/6-31G\* Geometry

|    |           |           |           |
|----|-----------|-----------|-----------|
| C  | 0.288661  | 1.785963  | -0.259913 |
| C  | -1.720998 | 0.301008  | 0.155272  |
| C  | 0.537569  | -0.456405 | 0.799361  |
| C  | -0.848809 | -0.984414 | 0.273568  |
| C  | 1.170165  | 0.560381  | -0.132326 |
| C  | -1.129328 | 1.412558  | -0.705957 |
| H  | 0.355343  | 0.056329  | 1.747657  |
| H  | -1.067545 | 1.082458  | -1.749793 |
| H  | 0.723493  | 2.497559  | -0.961390 |
| H  | -1.933684 | 0.680656  | 1.156150  |
| H  | -1.777559 | 2.292285  | -0.681678 |
| Cl | 0.217926  | 2.730634  | 1.333013  |
| Br | -3.543538 | -0.100646 | -0.559451 |
| C  | -1.485254 | -1.919918 | 1.318506  |
| H  | -1.515363 | -1.447515 | 2.307980  |
| H  | -0.924372 | -2.852702 | 1.405988  |
| H  | -2.511223 | -2.158033 | 1.026056  |
| C  | -0.688907 | -1.719298 | -1.067600 |
| H  | -1.665218 | -2.036275 | -1.442888 |
| H  | -0.066123 | -2.608773 | -0.934552 |
| H  | -0.218840 | -1.092345 | -1.831862 |
| Cl | 1.629129  | -1.830533 | 1.304466  |
| C  | 2.276261  | 0.535653  | -0.896469 |
| H  | 2.486735  | 1.446850  | -1.455865 |

|    |          |           |           |
|----|----------|-----------|-----------|
| C  | 3.286936 | -0.533802 | -1.153988 |
| H  | 3.103911 | -1.465337 | -0.632053 |
| H  | 3.366699 | -0.721253 | -2.227795 |
| Cl | 4.949992 | 0.038625  | -0.645002 |

**SCF Energy (PCM/mPW1PW91/6-31+G\*\*) =  
-4341.94549286**

**Number of imaginary frequencies = 0**

**2e\_C001**

**B3LYP/6-31G\* Geometry**

|    |           |           |           |
|----|-----------|-----------|-----------|
| C  | -0.417544 | 1.670760  | 0.537106  |
| C  | 1.588043  | 0.178243  | 0.242987  |
| C  | -0.612094 | -0.811598 | 0.900346  |
| C  | 0.714388  | -1.090946 | 0.126529  |
| C  | -1.319092 | 0.451555  | 0.467118  |
| C  | 0.898504  | 1.458358  | -0.232853 |
| H  | -1.253198 | -1.683244 | 0.784379  |
| H  | 1.556139  | 2.315707  | -0.068767 |
| H  | -0.192239 | 1.869716  | 1.588748  |
| H  | 1.927390  | 0.288260  | 1.274229  |
| H  | 0.690318  | 1.406611  | -1.305207 |
| Cl | -1.195317 | 3.208675  | -0.049495 |
| Br | 3.300922  | -0.006076 | -0.767875 |
| C  | 0.316862  | -1.396246 | -1.336770 |
| H  | -0.292942 | -0.609549 | -1.788256 |
| H  | -0.258946 | -2.326487 | -1.384905 |
| H  | 1.219303  | -1.520271 | -1.941395 |
| C  | 1.434822  | -2.320087 | 0.707564  |
| H  | 2.296448  | -2.576175 | 0.085568  |
| H  | 0.760020  | -3.183387 | 0.730815  |
| H  | 1.789924  | -2.140260 | 1.725580  |
| Cl | -0.346893 | -0.722070 | 2.741177  |
| C  | -2.599151 | 0.482824  | 0.067059  |
| H  | -3.004170 | 1.429830  | -0.276368 |
| C  | -3.561739 | -0.656908 | 0.041436  |
| H  | -3.245027 | -1.527755 | 0.613309  |
| H  | -4.542674 | -0.340498 | 0.399963  |
| Cl | -3.848414 | -1.250463 | -1.673164 |

**SCF Energy (PCM/mPW1PW91/6-31+G\*\*) =  
-4341.95231952**

**Number of imaginary frequencies = 0**

**2e\_C002**

**B3LYP/6-31G\* Geometry**

|   |           |           |           |
|---|-----------|-----------|-----------|
| C | -0.424208 | 1.447535  | 0.630667  |
| C | 1.666939  | 0.069777  | 0.345960  |
| C | -0.573644 | -1.030947 | 0.238401  |
| C | 0.891382  | -1.102932 | -0.296413 |
| C | -1.235435 | 0.311740  | 0.030353  |

|    |           |           |           |
|----|-----------|-----------|-----------|
| C  | 1.029608  | 1.442519  | 0.122332  |
| H  | -1.142175 | -1.832044 | -0.230283 |
| H  | 1.601809  | 2.206427  | 0.654867  |
| H  | -0.428575 | 1.335245  | 1.718448  |
| H  | 1.789809  | -0.123585 | 1.412575  |
| H  | 1.046143  | 1.704818  | -0.939416 |
| Cl | -1.131034 | 3.100979  | 0.350456  |
| Br | 3.552919  | 0.156846  | -0.306868 |
| C  | 0.808595  | -0.976834 | -1.835452 |
| H  | 0.274672  | -0.079793 | -2.160429 |
| H  | 0.290780  | -1.846097 | -2.256144 |
| H  | 1.816929  | -0.944874 | -2.256539 |
| C  | 1.536045  | -2.455582 | 0.051826  |
| H  | 2.517231  | -2.534337 | -0.423353 |
| H  | 0.912021  | -3.281353 | -0.308621 |
| H  | 1.667543  | -2.577049 | 1.129954  |
| Cl | -0.675930 | -1.448910 | 2.046379  |
| C  | -2.399324 | 0.480494  | -0.614696 |
| H  | -2.787225 | 1.490290  | -0.710321 |
| C  | -3.259831 | -0.570031 | -1.234418 |
| H  | -3.482457 | -0.329407 | -2.276481 |
| H  | -2.852780 | -1.578671 | -1.185324 |
| Cl | -4.888132 | -0.639929 | -0.400360 |

**SCF Energy (PCM/mPW1PW91/6-31+G\*\*) =  
-4341.95169674**

**Number of imaginary frequencies = 0**

**2e\_C003**

**B3LYP/6-31G\* Geometry**

|    |           |           |           |
|----|-----------|-----------|-----------|
| C  | -0.005538 | 1.726364  | -0.391773 |
| C  | -1.437910 | -0.308797 | -1.155994 |
| C  | 0.220503  | -0.508696 | 0.698987  |
| C  | -0.421673 | -1.284984 | -0.495906 |
| C  | 0.956276  | 0.730944  | 0.226184  |
| C  | -0.876734 | 1.079126  | -1.479540 |
| H  | -0.594968 | -0.181004 | 1.349175  |
| H  | -0.220376 | 0.965993  | -2.354258 |
| H  | 0.551854  | 2.549209  | -0.838830 |
| H  | -1.821947 | -0.766209 | -2.069083 |
| H  | -1.682819 | 1.755052  | -1.775082 |
| Cl | -1.012097 | 2.563543  | 0.910371  |
| Br | -3.108754 | -0.104642 | -0.061098 |
| C  | -1.124841 | -2.574741 | -0.032135 |
| H  | -1.775941 | -2.401683 | 0.827119  |
| H  | -0.387960 | -3.334525 | 0.238144  |
| H  | -1.741425 | -2.972560 | -0.846317 |
| C  | 0.637364  | -1.672906 | -1.553569 |
| H  | 0.164305  | -2.213683 | -2.380777 |

|    |          |           |           |
|----|----------|-----------|-----------|
| H  | 1.380193 | -2.339076 | -1.103568 |
| H  | 1.173666 | -0.813944 | -1.964349 |
| Cl | 1.185008 | -1.611523 | 1.791335  |
| C  | 2.260668 | 1.052130  | 0.191243  |
| H  | 2.497605 | 2.040047  | -0.202119 |
| C  | 3.486141 | 0.289339  | 0.580496  |
| H  | 4.037400 | 0.804956  | 1.370787  |
| H  | 3.308787 | -0.739200 | 0.868971  |
| Cl | 4.636058 | 0.232828  | -0.849315 |

**SCF Energy (PCM/mPW1PW91/6-31+G\*\*) =  
-4341.94208026**

**Number of imaginary frequencies = 0**

**2f\_C001**

**B3LYP/6-31G\* Geometry**

|    |           |           |           |
|----|-----------|-----------|-----------|
| C  | 0.824359  | -0.946357 | -0.564330 |
| C  | -1.310688 | 0.410626  | -1.192191 |
| C  | 0.092057  | 1.108832  | 0.852566  |
| C  | -0.850113 | 1.580620  | -0.288647 |
| C  | 1.179106  | 0.155152  | 0.406058  |
| C  | -0.170294 | -0.501805 | -1.645416 |
| H  | 0.560572  | 1.996544  | 1.281312  |
| H  | -0.567731 | -1.376797 | -2.164612 |
| H  | 1.723050  | -1.290598 | -1.073581 |
| H  | -1.796168 | 0.829999  | -2.074622 |
| H  | 0.418637  | 0.060217  | -2.384434 |
| Cl | 0.252583  | -2.460189 | 0.321307  |
| Br | -2.791813 | -0.686799 | -0.414928 |
| C  | 0.008037  | 2.531284  | -1.175510 |
| H  | 0.943256  | 2.078110  | -1.515847 |
| H  | 0.266917  | 3.432428  | -0.609017 |
| H  | -0.561817 | 2.847236  | -2.056194 |
| C  | -2.035604 | 2.401765  | 0.243720  |
| H  | -2.602371 | 2.822064  | -0.595287 |
| H  | -1.674252 | 3.234617  | 0.857502  |
| H  | -2.714014 | 1.797245  | 0.845197  |
| Cl | -0.795282 | 0.386152  | 2.301025  |
| C  | 2.434052  | 0.348485  | 0.848537  |
| H  | 2.629793  | 1.204064  | 1.492872  |
| C  | 3.619308  | -0.511789 | 0.566112  |
| H  | 3.365536  | -1.503822 | 0.196202  |
| H  | 4.246749  | -0.616148 | 1.452495  |
| Cl | 4.703522  | 0.254149  | -0.706739 |

**SCF Energy (PCM/mPW1PW91/6-31+G\*\*) =  
-4341.94413393**

**Number of imaginary frequencies = 0**

**2f\_C002**

**B3LYP/6-31G\* Geometry**

|    |           |           |           |
|----|-----------|-----------|-----------|
| C  | 0.676081  | -0.767913 | -1.035379 |
| C  | -1.714635 | 0.273907  | -1.046266 |
| C  | 0.108143  | 1.256390  | 0.489358  |
| C  | -1.180697 | 1.540444  | -0.331540 |
| C  | 1.144671  | 0.432401  | -0.246619 |
| C  | -0.636215 | -0.515002 | -1.791280 |
| H  | 0.549540  | 2.219807  | 0.751022  |
| H  | -1.042609 | -1.461946 | -2.153651 |
| H  | 1.426722  | -1.043533 | -1.774163 |
| H  | -2.479738 | 0.581200  | -1.760794 |
| H  | -0.366526 | 0.070921  | -2.681962 |
| Cl | 0.580774  | -2.271299 | 0.024295  |
| Br | -2.756937 | -0.952478 | 0.141229  |
| C  | -0.763210 | 2.548207  | -1.442326 |
| H  | 0.079242  | 2.199766  | -2.046437 |
| H  | -0.470981 | 3.500999  | -0.987727 |
| H  | -1.606908 | 2.746967  | -2.112177 |
| C  | -2.265256 | 2.224168  | 0.516827  |
| H  | -3.106882 | 2.518842  | -0.120902 |
| H  | -1.864399 | 3.129441  | 0.986591  |
| H  | -2.643976 | 1.566972  | 1.298926  |
| Cl | -0.217636 | 0.504513  | 2.141658  |
| C  | 2.427132  | 0.834635  | -0.210677 |
| H  | 2.667863  | 1.734498  | 0.353383  |
| C  | 3.610898  | 0.177565  | -0.843214 |
| H  | 4.086026  | 0.830287  | -1.580427 |
| H  | 3.390578  | -0.784447 | -1.303092 |
| Cl | 4.897648  | -0.145089 | 0.412582  |

**SCF Energy (PCM/mPW1PW91/6-31+G\*\*) =  
-4341.94272419**

**Number of imaginary frequencies = 0**

**2f\_C003**

**B3LYP/6-31G\* Geometry**

|    |           |           |           |
|----|-----------|-----------|-----------|
| C  | 0.615842  | -1.037331 | -1.278447 |
| C  | -1.640003 | -0.327227 | -0.452200 |
| C  | 0.110035  | 1.328690  | -0.966137 |
| C  | -1.138431 | 1.086380  | -0.038430 |
| C  | 1.200858  | 0.268914  | -0.769570 |
| C  | -0.591330 | -1.440901 | -0.413435 |
| H  | -0.235287 | 1.288550  | -2.005085 |
| H  | -0.258946 | -1.630663 | 0.611020  |
| H  | 0.277383  | -0.877579 | -2.307758 |
| H  | -2.072246 | -0.267420 | -1.454913 |
| H  | -1.027850 | -2.366400 | -0.797619 |
| Cl | 1.731253  | -2.469272 | -1.444072 |
| Br | -3.192885 | -0.923094 | 0.651815  |
| C  | -2.237317 | 2.117613  | -0.354511 |

|    |           |           |           |
|----|-----------|-----------|-----------|
| H  | -2.462578 | 2.144478  | -1.428212 |
| H  | -1.932839 | 3.120575  | -0.048060 |
| H  | -3.156447 | 1.856437  | 0.176786  |
| C  | -0.752410 | 1.162242  | 1.447914  |
| H  | -1.629758 | 0.968968  | 2.070120  |
| H  | -0.374871 | 2.160616  | 1.686040  |
| H  | 0.023166  | 0.440127  | 1.716973  |
| Cl | 0.725801  | 3.039304  | -0.812393 |
| C  | 2.366014  | 0.553331  | -0.172400 |
| H  | 2.511202  | 1.590442  | 0.115452  |
| C  | 3.527032  | -0.312938 | 0.194901  |
| H  | 4.456762  | 0.097764  | -0.205394 |
| H  | 3.434632  | -1.354608 | -0.084919 |
| Cl | 3.745118  | -0.290952 | 2.018579  |

SCF Energy (PCM/mPW1PW91/6-31+G\*\*) =  
-4341.94111977

Number of imaginary frequencies = 0

**2f\_C004**

**B3LYP/6-31G\* Geometry**

|    |           |           |           |
|----|-----------|-----------|-----------|
| C  | 0.615826  | -1.037337 | -1.278435 |
| C  | -1.640035 | -0.327205 | -0.452221 |
| C  | 0.110038  | 1.328678  | -0.966122 |
| C  | -1.138461 | 1.086370  | -0.038420 |
| C  | 1.200830  | 0.268899  | -0.769516 |
| C  | -0.591390 | -1.440898 | -0.413472 |
| H  | -0.235288 | 1.288503  | -2.005071 |
| H  | -0.259036 | -1.630708 | 0.610983  |
| H  | 0.277404  | -0.877562 | -2.307756 |
| H  | -2.072330 | -0.267385 | -1.454911 |
| H  | -1.027908 | -2.366379 | -0.797704 |
| Cl | 1.731216  | -2.469276 | -1.444012 |
| Br | -3.192917 | -0.923070 | 0.651834  |
| C  | -2.237337 | 2.117617  | -0.354506 |
| H  | -2.462496 | 2.144572  | -1.428224 |
| H  | -1.932914 | 3.120558  | -0.047932 |
| H  | -3.156509 | 1.856375  | 0.176689  |
| C  | -0.752446 | 1.162192  | 1.447922  |
| H  | -1.629798 | 0.968929  | 2.070126  |
| H  | -0.374875 | 2.160545  | 1.686083  |
| H  | 0.023104  | 0.440041  | 1.716969  |
| Cl | 0.725800  | 3.039271  | -0.812401 |
| C  | 2.366007  | 0.553305  | -0.172370 |
| H  | 2.511226  | 1.590423  | 0.115445  |
| C  | 3.527065  | -0.312953 | 0.194838  |
| H  | 4.456763  | 0.097735  | -0.205544 |
| H  | 3.434637  | -1.354631 | -0.084946 |
| Cl | 3.745309  | -0.290910 | 2.018495  |

SCF Energy (PCM/mPW1PW91/6-31+G\*\*) =  
-4341.94112031

Number of imaginary frequencies = 0

**2g\_C001**

**B3LYP/6-31G\* Geometry**

|    |           |           |           |
|----|-----------|-----------|-----------|
| C  | -0.861734 | -1.091660 | 0.874181  |
| C  | 1.486487  | -0.319217 | 0.316817  |
| C  | -0.303012 | 1.349764  | 0.613378  |
| C  | 1.003384  | 1.061756  | -0.212361 |
| C  | -1.361823 | 0.269961  | 0.465399  |
| C  | 0.464832  | -1.444609 | 0.194419  |
| H  | -0.026755 | 1.405859  | 1.670745  |
| H  | 0.247807  | -1.641169 | -0.861953 |
| H  | -1.590437 | -1.869929 | 0.658917  |
| H  | 1.807427  | -0.217240 | 1.355252  |
| H  | 0.865855  | -2.368315 | 0.619253  |
| Cl | -0.666419 | -1.168291 | 2.719364  |
| Br | 3.154170  | -0.927509 | -0.600828 |
| C  | 2.067396  | 2.126475  | 0.111526  |
| H  | 2.240940  | 2.197737  | 1.192525  |
| H  | 1.757966  | 3.110312  | -0.248017 |
| H  | 3.015408  | 1.864645  | -0.365404 |
| C  | 0.711801  | 1.042446  | -1.722800 |
| H  | 1.611158  | 0.753894  | -2.272997 |
| H  | 0.405515  | 2.036879  | -2.058233 |
| H  | -0.088788 | 0.343983  | -1.985284 |
| Cl | -0.953117 | 3.019322  | 0.260081  |
| C  | -2.599905 | 0.470875  | -0.010939 |
| H  | -2.865020 | 1.464084  | -0.358537 |
| C  | -3.681717 | -0.553232 | -0.120532 |
| H  | -4.662577 | -0.099239 | 0.024013  |
| H  | -3.576285 | -1.386597 | 0.573119  |
| Cl | -3.738841 | -1.298526 | -1.801148 |

SCF Energy (PCM/mPW1PW91/6-31+G\*\*) =  
-4341.95162914

Number of imaginary frequencies = 0

**2g\_C002**

**B3LYP/6-31G\* Geometry**

|   |           |           |           |
|---|-----------|-----------|-----------|
| C | -0.712572 | -1.368162 | 0.070576  |
| C | 1.625646  | -0.409589 | 0.230322  |
| C | -0.321774 | 1.042192  | 0.665586  |
| C | 1.131299  | 1.056318  | 0.064124  |
| C | -1.245659 | 0.039597  | -0.010346 |
| C | 0.736338  | -1.464708 | -0.418774 |
| H | -0.246147 | 0.768759  | 1.722191  |
| H | 0.727617  | -1.327119 | -1.506541 |
| H | -1.330559 | -2.068773 | -0.486391 |

|    |           |           |           |
|----|-----------|-----------|-----------|
| H  | 1.751254  | -0.630600 | 1.291587  |
| H  | 1.130851  | -2.464659 | -0.221688 |
| Cl | -0.824650 | -1.989384 | 1.814538  |
| Br | 3.472443  | -0.660061 | -0.492580 |
| C  | 2.031168  | 1.986610  | 0.898325  |
| H  | 2.002653  | 1.716075  | 1.961064  |
| H  | 1.712129  | 3.026858  | 0.804922  |
| H  | 3.066975  | 1.908456  | 0.558087  |
| C  | 1.120659  | 1.507290  | -1.406205 |
| H  | 2.126364  | 1.431387  | -1.827438 |
| H  | 0.792373  | 2.547636  | -1.477392 |
| H  | 0.446204  | 0.904160  | -2.022199 |
| Cl | -1.027546 | 2.724843  | 0.716734  |
| C  | -2.385427 | 0.364764  | -0.639182 |
| H  | -2.674667 | 1.410790  | -0.665141 |
| C  | -3.342746 | -0.552424 | -1.325870 |
| H  | -3.056498 | -1.602920 | -1.314628 |
| H  | -3.508915 | -0.242115 | -2.360223 |
| Cl | -4.988789 | -0.469996 | -0.530521 |

**SCF Energy (PCM/mPW1PW91/6-31+G\*\*) =  
-4341.95095901**

**Number of imaginary frequencies = 0**

**2g\_C003**

**B3LYP/6-31G\* Geometry**

|    |           |           |           |
|----|-----------|-----------|-----------|
| C  | -0.420891 | 1.151922  | 0.174059  |
| C  | 1.390009  | 0.011484  | -1.176192 |
| C  | 0.065197  | -1.248846 | 0.645918  |
| C  | 0.950133  | -1.369587 | -0.631344 |
| C  | -1.021564 | -0.188868 | 0.542047  |
| C  | 0.274186  | 1.061540  | -1.192907 |
| H  | -0.396175 | -2.221299 | 0.819752  |
| H  | 0.691454  | 2.035060  | -1.458392 |
| H  | 0.328188  | 1.405583  | 0.928276  |
| H  | 1.797340  | -0.115263 | -2.179951 |
| H  | -0.464987 | 0.798077  | -1.958932 |
| Cl | -1.530826 | 2.597102  | 0.170598  |
| Br | 2.953185  | 0.805047  | -0.195181 |
| C  | 0.037142  | -2.006673 | -1.720540 |
| H  | -0.884214 | -1.445114 | -1.893489 |
| H  | -0.245375 | -3.021828 | -1.421403 |
| H  | 0.579920  | -2.081469 | -2.668981 |
| C  | 2.139387  | -2.320278 | -0.418010 |
| H  | 2.672069  | -2.468638 | -1.364380 |
| H  | 1.784393  | -3.298381 | -0.074640 |
| H  | 2.847494  | -1.932571 | 0.314118  |
| Cl | 1.028108  | -0.972110 | 2.201423  |
| C  | -2.286733 | -0.598184 | 0.735816  |

|    |           |           |           |
|----|-----------|-----------|-----------|
| H  | -2.412325 | -1.651027 | 0.986421  |
| C  | -3.590774 | 0.125465  | 0.657523  |
| H  | -3.514120 | 1.178949  | 0.419280  |
| H  | -4.163149 | -0.007735 | 1.578414  |
| Cl | -4.626608 | -0.628454 | -0.659844 |

**SCF Energy (PCM/mPW1PW91/6-31+G\*\*) =  
-4341.94297146**

**Number of imaginary frequencies = 0**

**2g\_C004**

**B3LYP/6-31G\* Geometry**

|    |           |           |           |
|----|-----------|-----------|-----------|
| C  | -0.420674 | 1.152011  | 0.174119  |
| C  | 1.389165  | 0.010706  | -1.176487 |
| C  | 0.065240  | -1.248511 | 0.647308  |
| C  | 0.949568  | -1.370079 | -0.630547 |
| C  | -1.021499 | -0.188505 | 0.542896  |
| C  | 0.273455  | 1.060891  | -1.193305 |
| H  | -0.396278 | -2.220829 | 0.821565  |
| H  | 0.690758  | 2.034191  | -1.459508 |
| H  | 0.329156  | 1.405445  | 0.927670  |
| H  | 1.796094  | -0.116693 | -2.180318 |
| H  | -0.466170 | 0.797077  | -1.958751 |
| Cl | -1.529928 | 2.597657  | 0.171481  |
| Br | 2.952767  | 0.804929  | -0.196532 |
| C  | 0.036191  | -2.007946 | -1.718857 |
| H  | -0.885160 | -1.446496 | -1.892069 |
| H  | -0.246353 | -3.022831 | -1.418809 |
| H  | 0.578749  | -2.083641 | -2.667352 |
| C  | 2.138984  | -2.320472 | -0.416908 |
| H  | 2.671463  | -2.469304 | -1.363316 |
| H  | 1.784160  | -3.298417 | -0.072912 |
| H  | 2.847163  | -1.932169 | 0.314811  |
| Cl | 1.028829  | -0.971286 | 2.201846  |
| C  | -2.286757 | -0.597614 | 0.736560  |
| H  | -2.412412 | -1.650239 | 0.988036  |
| C  | -3.590686 | 0.126065  | 0.656891  |
| H  | -3.513835 | 1.179279  | 0.417685  |
| H  | -4.163769 | -0.006530 | 1.577410  |
| Cl | -4.625861 | -0.628762 | -0.660711 |

**SCF Energy (PCM/mPW1PW91/6-31+G\*\*) =  
-4341.94296976**

**Number of imaginary frequencies = 0**

**2h\_C001**

**B3LYP/6-31G\* Geometry**

|   |           |           |           |
|---|-----------|-----------|-----------|
| C | 0.670671  | -1.285068 | 0.091235  |
| C | -1.364330 | -0.079446 | 1.173024  |
| C | -0.083305 | 1.006104  | -0.675767 |
| C | -0.848147 | 1.290621  | 0.654475  |

|    |           |           |           |
|----|-----------|-----------|-----------|
| C  | 1.082065  | 0.052518  | -0.478468 |
| C  | -0.287872 | -1.158935 | 1.283707  |
| H  | -0.789999 | 0.550313  | -1.375507 |
| H  | 0.342060  | -0.899649 | 2.146214  |
| H  | 1.542585  | -1.843664 | 0.424657  |
| H  | -1.833485 | 0.066551  | 2.147234  |
| H  | -0.740165 | -2.128410 | 1.505726  |
| Cl | -0.018968 | -2.348552 | -1.255423 |
| Br | -2.895144 | -0.773854 | 0.074021  |
| C  | -2.019187 | 2.268311  | 0.442994  |
| H  | -2.658149 | 1.967557  | -0.390132 |
| H  | -1.646011 | 3.276320  | 0.248485  |
| H  | -2.639842 | 2.303556  | 1.346048  |
| C  | 0.091666  | 1.889046  | 1.727753  |
| H  | -0.455599 | 2.043880  | 2.664348  |
| H  | 0.460189  | 2.862604  | 1.391537  |
| H  | 0.963412  | 1.263404  | 1.936313  |
| Cl | 0.412197  | 2.556994  | -1.501786 |
| C  | 2.364243  | 0.348438  | -0.740765 |
| H  | 2.606291  | 1.347002  | -1.089257 |
| C  | 3.523316  | -0.583391 | -0.600982 |
| H  | 4.316214  | -0.329644 | -1.304760 |
| H  | 3.262846  | -1.633448 | -0.729105 |
| Cl | 4.302358  | -0.458481 | 1.064516  |

**SCF Energy (PCM/mPW1PW91/6-31+G\*\*) =  
-4341.94806661**

**Number of imaginary frequencies = 0**

**2h\_C002**

**B3LYP/6-31G\* Geometry**

|    |           |           |           |
|----|-----------|-----------|-----------|
| C  | 0.597086  | -0.920827 | 1.011797  |
| C  | -1.699032 | -0.162491 | 0.288414  |
| C  | 0.216321  | 1.435945  | 0.259355  |
| C  | -1.135235 | 1.081476  | -0.434354 |
| C  | 1.201575  | 0.285107  | 0.323316  |
| C  | -0.730143 | -1.345393 | 0.353587  |
| H  | 0.663621  | 2.282487  | -0.262646 |
| H  | -1.176602 | -2.155392 | 0.936116  |
| H  | 0.411039  | -0.654967 | 2.055905  |
| H  | -2.020334 | 0.120191  | 1.291917  |
| H  | -0.533570 | -1.735807 | -0.649007 |
| Cl | 1.675761  | -2.387699 | 1.122484  |
| Br | -3.392010 | -0.806678 | -0.552790 |
| C  | -0.812539 | 0.799862  | -1.920365 |
| H  | -0.056593 | 0.021582  | -2.052190 |
| H  | -0.439960 | 1.710186  | -2.402641 |
| H  | -1.721298 | 0.485363  | -2.440275 |
| C  | -2.118887 | 2.262559  | -0.362367 |

|    |           |           |           |
|----|-----------|-----------|-----------|
| H  | -3.012579 | 2.040672  | -0.951572 |
| H  | -1.656781 | 3.169835  | -0.767967 |
| H  | -2.429555 | 2.471581  | 0.664466  |
| Cl | -0.042434 | 2.090195  | 1.984553  |
| C  | 2.415755  | 0.478253  | -0.214397 |
| H  | 2.606196  | 1.465472  | -0.628886 |
| C  | 3.591911  | -0.459648 | -0.329621 |
| H  | 3.348452  | -1.386060 | -0.846864 |
| H  | 4.020633  | -0.709611 | 0.641837  |
| Cl | 4.928838  | 0.319805  | -1.288961 |

**SCF Energy (PCM/mPW1PW91/6-31+G\*\*) =  
-4341.94571486**

**Number of imaginary frequencies = 0**

**2h\_C003**

**B3LYP/6-31G\* Geometry**

|    |           |           |           |
|----|-----------|-----------|-----------|
| C  | 0.695512  | -0.459657 | 1.311068  |
| C  | -1.608073 | -0.145704 | 0.325027  |
| C  | 0.155797  | 1.582946  | -0.018265 |
| C  | -1.112557 | 0.937625  | -0.657306 |
| C  | 1.239850  | 0.585664  | 0.357058  |
| C  | -0.540879 | -1.168008 | 0.720888  |
| H  | 0.555016  | 2.319963  | -0.715431 |
| H  | -0.948847 | -1.853145 | 1.468188  |
| H  | 0.406242  | 0.056057  | 2.230453  |
| H  | -2.019356 | 0.335015  | 1.213919  |
| H  | -0.240184 | -1.768155 | -0.142632 |
| Cl | 1.848354  | -1.745935 | 1.895699  |
| Br | -3.177347 | -1.147590 | -0.397364 |
| C  | -0.673722 | 0.341828  | -2.015536 |
| H  | 0.153770  | -0.366454 | -1.926321 |
| H  | -0.352848 | 1.142574  | -2.690825 |
| H  | -1.518416 | -0.175744 | -2.477518 |
| C  | -2.198745 | 1.996388  | -0.915360 |
| H  | -3.033226 | 1.548243  | -1.461094 |
| H  | -1.796435 | 2.818219  | -1.518499 |
| H  | -2.586025 | 2.418045  | 0.015645  |
| Cl | -0.263277 | 2.603966  | 1.480679  |
| C  | 2.449599  | 0.776214  | -0.196433 |
| H  | 2.542403  | 1.647676  | -0.843618 |
| C  | 3.726280  | 0.005850  | -0.102471 |
| H  | 3.675469  | -0.889231 | 0.504582  |
| H  | 4.535739  | 0.648983  | 0.251637  |
| Cl | 4.240539  | -0.530694 | -1.779483 |

**SCF Energy (PCM/mPW1PW91/6-31+G\*\*) =  
-4341.94611341**

**Number of imaginary frequencies = 0**

**2h\_C004**

**B3LYP/6-31G\* Geometry**

|    |           |           |           |
|----|-----------|-----------|-----------|
| C  | 0.548019  | -1.178127 | 0.724555  |
| C  | -1.770578 | -0.033460 | 1.014674  |
| C  | -0.024491 | 0.977509  | -0.459487 |
| C  | -1.178030 | 1.319856  | 0.534596  |
| C  | 1.066113  | 0.135338  | 0.185923  |
| C  | -0.734878 | -1.021606 | 1.554134  |
| H  | -0.457165 | 0.408379  | -1.287436 |
| H  | -0.414479 | -0.646998 | 2.536902  |
| H  | 1.294093  | -1.661804 | 1.351234  |
| H  | -2.518779 | 0.162589  | 1.784353  |
| H  | -1.193751 | -1.998310 | 1.725489  |
| Cl | 0.337360  | -2.379333 | -0.662508 |
| Br | -2.865747 | -0.925587 | -0.410841 |
| C  | -2.266002 | 2.186063  | -0.127458 |
| H  | -2.589369 | 1.773487  | -1.085414 |
| H  | -1.898276 | 3.201204  | -0.293188 |
| H  | -3.143497 | 2.243239  | 0.527045  |
| C  | -0.648690 | 2.080906  | 1.772614  |
| H  | -1.468943 | 2.289689  | 2.468445  |
| H  | -0.223488 | 3.038900  | 1.459351  |
| H  | 0.130751  | 1.537206  | 2.313210  |
| Cl | 0.626939  | 2.483581  | -1.258035 |
| C  | 2.348385  | 0.516929  | 0.290852  |
| H  | 2.630242  | 1.483645  | -0.114456 |
| C  | 3.479781  | -0.244014 | 0.899757  |
| H  | 3.215325  | -1.231884 | 1.273438  |
| H  | 3.951945  | 0.326497  | 1.703447  |
| Cl | 4.804451  | -0.514051 | -0.333807 |

SCF Energy (PCM/mPW1PW91/6-31+G\*\*) =  
-4341.94701361

Number of imaginary frequencies = 0

**2h\_C005****B3LYP/6-31G\* Geometry**

|    |           |           |           |
|----|-----------|-----------|-----------|
| C  | 0.666797  | -0.942936 | 0.788653  |
| C  | -1.688540 | -0.130821 | 0.346330  |
| C  | 0.247307  | 1.405167  | 0.038985  |
| C  | -1.188915 | 1.078915  | -0.472728 |
| C  | 1.213531  | 0.231495  | -0.001150 |
| C  | -0.748037 | -1.336112 | 0.315859  |
| H  | 0.644452  | 2.231137  | -0.551678 |
| H  | -1.134687 | -2.120429 | 0.971545  |
| H  | 0.622959  | -0.640651 | 1.838326  |
| H  | -1.870427 | 0.182731  | 1.375274  |
| H  | -0.692319 | -1.755326 | -0.692855 |
| Cl | 1.670787  | -2.465477 | 0.826006  |
| Br | -3.490951 | -0.745064 | -0.254879 |

|    |           |           |           |
|----|-----------|-----------|-----------|
| C  | -1.062408 | 0.755260  | -1.979410 |
| H  | -0.349782 | -0.047947 | -2.183683 |
| H  | -0.728985 | 1.643601  | -2.527160 |
| H  | -2.036993 | 0.456351  | -2.373912 |
| C  | -2.123693 | 2.289829  | -0.308821 |
| H  | -3.089662 | 2.080034  | -0.775873 |
| H  | -1.693162 | 3.174391  | -0.791817 |
| H  | -2.297798 | 2.530054  | 0.743043  |
| Cl | 0.226802  | 2.093371  | 1.767151  |
| C  | 2.345872  | 0.409923  | -0.702774 |
| H  | 2.468886  | 1.390032  | -1.162159 |
| C  | 3.501935  | -0.493844 | -0.990086 |
| H  | 3.591798  | -0.674762 | -2.064470 |
| H  | 3.482070  | -1.438948 | -0.461846 |
| Cl | 5.060285  | 0.340678  | -0.512634 |

SCF Energy (PCM/mPW1PW91/6-31+G\*\*) =  
-4341.94596549

Number of imaginary frequencies = 0

**3a\_C001****B3LYP/6-31G\* Geometry**

|    |         |         |         |
|----|---------|---------|---------|
| C  | -2.2781 | -0.2065 | 0.1678  |
| C  | -2.7301 | 0.9247  | 1.1404  |
| H  | -2.9350 | 0.4372  | 2.1051  |
| C  | -1.6241 | 1.9679  | 1.3070  |
| H  | -2.0276 | 2.9628  | 1.4995  |
| C  | -0.3177 | 1.8309  | 0.6346  |
| C  | -0.1041 | 0.5187  | -0.2000 |
| C  | -0.1031 | -0.6991 | 0.7780  |
| H  | 0.1808  | -0.3742 | 1.7795  |
| O  | -1.4809 | -1.1365 | 0.8551  |
| Br | -3.9429 | -1.2038 | -0.3652 |
| C  | -1.4289 | 0.2695  | -1.0438 |
| O  | -3.8414 | 1.6694  | 0.6813  |
| H  | -4.5434 | 1.0307  | 0.4647  |
| O  | -0.4607 | 1.6408  | 2.0654  |
| C  | 1.2256  | 0.5321  | -0.9897 |
| H  | 1.4291  | 1.5143  | -1.4172 |
| H  | 1.1946  | -0.1668 | -1.8287 |
| C  | 2.3646  | 0.1292  | -0.0428 |
| H  | 2.3061  | 0.7093  | 0.8768  |
| C  | 2.3100  | -1.3816 | 0.3093  |
| C  | 0.8242  | -1.8329 | 0.3540  |
| H  | 0.5591  | -2.2005 | -0.6408 |
| H  | 0.7201  | -2.6750 | 1.0432  |
| C  | 3.0994  | -2.2986 | -0.6232 |
| H  | 2.7756  | -2.1426 | -1.6593 |



|    |         |         |         |
|----|---------|---------|---------|
| H  | 2.9149  | -3.3431 | -0.3558 |
| H  | 4.1696  | -2.0994 | -0.5653 |
| Cl | 3.0346  | -1.5713 | 2.0045  |
| Br | 4.1118  | 0.7014  | -0.7992 |
| C  | 0.4459  | 3.0878  | 0.2685  |
| H  | 0.1427  | 3.9009  | 0.9338  |
| H  | 0.2411  | 3.3943  | -0.7632 |
| H  | 1.5283  | 2.9563  | 0.3735  |
| C  | -1.3079 | -0.8523 | -2.0976 |
| H  | -0.5261 | -0.6227 | -2.8274 |
| H  | -2.2488 | -0.9311 | -2.6478 |
| H  | -1.1129 | -1.8321 | -1.6599 |
| C  | -1.9791 | 1.5055  | -1.7775 |
| H  | -1.3150 | 1.7668  | -2.6101 |
| H  | -2.1061 | 2.3837  | -1.1460 |
| H  | -2.9612 | 1.2685  | -2.1988 |

SCF Energy (PCM/mPW1PW91/6-31+G\*\*) =  
-6413.74961064

Number of imaginary frequencies = 0

3a\_C002

B3LYP/6-31G\* Geometry

|    |           |           |           |
|----|-----------|-----------|-----------|
| C  | 1.969065  | -0.160547 | -0.374869 |
| C  | 2.906615  | 1.068811  | -0.250693 |
| H  | 3.202947  | 1.340157  | -1.274812 |
| C  | 2.153453  | 2.226052  | 0.397035  |
| H  | 2.818062  | 2.883044  | 0.96033   |
| C  | 0.737401  | 2.114034  | 0.802764  |
| C  | -0.00421  | 0.749707  | 0.48017   |
| C  | -0.106574 | 0.625922  | -1.06869  |
| H  | -0.113248 | 1.620925  | -1.508291 |
| O  | 1.135449  | 0.003796  | -1.487949 |
| Br | 3.164271  | -1.73325  | -0.801147 |
| C  | 1.030157  | -0.409748 | 0.837895  |
| O  | 4.029498  | 0.863387  | 0.584038  |
| H  | 4.474861  | 0.058823  | 0.264149  |
| O  | 1.138696  | 2.89869   | -0.346209 |
| C  | -1.389212 | 0.703706  | 1.201236  |
| H  | -1.670594 | 1.729902  | 1.440411  |
| H  | -1.300964 | 0.193064  | 2.164496  |
| C  | -2.636722 | 0.157162  | 0.470022  |
| H  | -3.522339 | 0.635272  | 0.885026  |
| C  | -2.631499 | 0.326193  | -1.057446 |
| C  | -1.298234 | -0.145537 | -1.634962 |
| H  | -1.22572  | -1.215083 | -1.415143 |
| H  | -1.300059 | -0.037745 | -2.72451  |
| C  | -3.831334 | -0.281184 | -1.779592 |
| H  | -3.781154 | -1.372256 | -1.73737  |

|    |           |           |           |
|----|-----------|-----------|-----------|
| H  | -3.827249 | 0.032497  | -2.82678  |
| H  | -4.771434 | 0.041043  | -1.322431 |
| Cl | -2.78841  | 2.181277  | -1.29869  |
| Br | -3.016206 | -1.766556 | 0.927987  |
| C  | 0.272117  | 2.980688  | 1.95892   |
| H  | 1.016186  | 3.759441  | 2.148504  |
| H  | 0.141936  | 2.400802  | 2.878878  |
| H  | -0.673265 | 3.483802  | 1.729309  |
| C  | 0.440785  | -1.830422 | 0.781611  |
| H  | -0.39751  | -1.93173  | 1.471334  |
| H  | 1.208201  | -2.548735 | 1.081596  |
| H  | 0.106904  | -2.117237 | -0.216153 |
| C  | 1.692654  | -0.271405 | 2.220665  |
| H  | 0.950887  | -0.476157 | 3.00232   |
| H  | 2.141344  | 0.701765  | 2.414481  |
| H  | 2.486961  | -1.017702 | 2.319543  |

SCF Energy (PCM/mPW1PW91/6-31+G\*\*) =  
-6413.74482357

Number of imaginary frequencies = 0

3b\_C001

B3LYP/6-31G\* Geometry

|    |          |          |          |
|----|----------|----------|----------|
| C  | -2.32248 | -0.09307 | 0.03605  |
| C  | -2.77898 | 1.08677  | 0.93267  |
| H  | -3.59162 | 1.60931  | 0.42076  |
| C  | -1.65174 | 2.09975  | 1.13859  |
| H  | -2.00008 | 3.11703  | 1.32766  |
| C  | -0.31348 | 1.89901  | 0.54293  |
| C  | -0.10870 | 0.56976  | -0.26841 |
| C  | -0.16635 | -0.62801 | 0.73016  |
| H  | 0.11867  | -0.29527 | 1.72863  |
| O  | -1.56153 | -1.01348 | 0.79833  |
| Br | -3.97242 | -1.05417 | -0.52607 |
| C  | -1.41101 | 0.33212  | -1.14750 |
| O  | -3.30814 | 0.63143  | 2.15411  |
| H  | -2.67213 | -0.02368 | 2.49248  |
| O  | -0.54360 | 1.71977  | 1.96110  |
| C  | 1.24419  | 0.53663  | -1.01815 |
| H  | 1.49069  | 1.50905  | -1.44561 |
| H  | 1.21627  | -0.16643 | -1.85364 |
| C  | 2.34383  | 0.10491  | -0.03803 |
| H  | 2.28190  | 0.69535  | 0.87467  |
| C  | 2.22956  | -1.39968 | 0.32635  |
| C  | 0.72848  | -1.80081 | 0.34275  |
| H  | 0.47381  | -2.17514 | -0.65188 |
| H  | 0.58064  | -2.62801 | 1.04187  |
| C  | 3.00829  | -2.35202 | -0.57929 |
| H  | 2.71162  | -2.19729 | -1.62373 |

|    |          |          |          |
|----|----------|----------|----------|
| H  | 2.78416  | -3.38695 | -0.30530 |
| H  | 4.08307  | -2.18693 | -0.50032 |
| Cl | 2.90963  | -1.59532 | 2.03943  |
| Br | 4.12742  | 0.61113  | -0.75429 |
| C  | 0.52458  | 3.11947  | 0.21688  |
| H  | 0.23508  | 3.94146  | 0.87727  |
| H  | 0.37606  | 3.44266  | -0.81975 |
| H  | 1.59465  | 2.93629  | 0.36176  |
| C  | -1.91596 | 1.56633  | -1.91901 |
| H  | -1.26597 | 1.76124  | -2.77948 |
| H  | -1.96438 | 2.48112  | -1.32573 |
| H  | -2.92089 | 1.36360  | -2.30530 |
| C  | -1.29000 | -0.80827 | -2.18110 |
| H  | -0.47111 | -0.62049 | -2.88189 |
| H  | -2.21152 | -0.86150 | -2.76564 |
| H  | -1.15271 | -1.78803 | -1.72231 |

SCF Energy (PCM/mPW1PW91/6-31+G\*\*) =  
-6413.75147490

Number of imaginary frequencies = 0

**3b\_C002**

**B3LYP/6-31G\* Geometry**

|    |           |           |           |
|----|-----------|-----------|-----------|
| C  | 2.010725  | -0.225859 | -0.199170 |
| C  | 2.966212  | 0.950317  | 0.105954  |
| H  | 3.732987  | 0.604270  | 0.804079  |
| C  | 2.209851  | 2.090086  | 0.782089  |
| H  | 2.834070  | 2.720653  | 1.418606  |
| C  | 0.759332  | 2.008768  | 1.063593  |
| C  | 0.007302  | 0.688551  | 0.606871  |
| C  | -0.009633 | 0.681821  | -0.949955 |
| H  | 0.015277  | 1.707312  | -1.311142 |
| O  | 1.246290  | 0.073676  | -1.349650 |
| Br | 3.166428  | -1.782271 | -0.671539 |
| C  | 0.988898  | -0.522832 | 0.931532  |
| O  | 3.644428  | 1.384362  | -1.048291 |
| H  | 2.959150  | 1.482172  | -1.733362 |
| O  | 1.274268  | 2.831337  | -0.007788 |
| C  | -1.418510 | 0.626916  | 1.243033  |
| H  | -1.693419 | 1.640143  | 1.537759  |
| H  | -1.397485 | 0.048896  | 2.171439  |
| C  | -2.633162 | 0.163178  | 0.405416  |
| H  | -3.530152 | 0.636978  | 0.800314  |
| C  | -2.535186 | 0.433617  | -1.104194 |
| C  | -1.178299 | -0.025536 | -1.635835 |
| H  | -1.135961 | -1.108770 | -1.487599 |
| H  | -1.114498 | 0.156495  | -2.713624 |
| C  | -3.701578 | -0.098154 | -1.933055 |
| H  | -3.673725 | -1.190455 | -1.962595 |

|    |           |           |           |
|----|-----------|-----------|-----------|
| H  | -3.631973 | 0.285137  | -2.954396 |
| H  | -4.660460 | 0.212738  | -1.508200 |
| Cl | -2.646834 | 2.304010  | -1.227394 |
| Br | -3.084439 | -1.775017 | 0.710653  |
| C  | 0.223708  | 2.833520  | 2.219772  |
| H  | 0.963464  | 3.589587  | 2.497531  |
| H  | 0.015663  | 2.216614  | 3.100722  |
| H  | -0.693986 | 3.364083  | 1.944344  |
| C  | 1.594993  | -0.504488 | 2.348443  |
| H  | 0.833114  | -0.790924 | 3.082654  |
| H  | 2.008519  | 0.457479  | 2.656330  |
| H  | 2.397291  | -1.248290 | 2.405315  |
| C  | 0.366797  | -1.918958 | 0.754378  |
| H  | -0.510627 | -2.036474 | 1.390543  |
| H  | 1.097805  | -2.676949 | 1.046624  |
| H  | 0.082900  | -2.134468 | -0.276016 |

SCF Energy (PCM/mPW1PW91/6-31+G\*\*) =  
-6413.74677840

Number of imaginary frequencies = 0

**3c\_C001**

**B3LYP/6-31G\* Geometry**

|    |           |           |           |
|----|-----------|-----------|-----------|
| C  | -2.249825 | -0.178188 | 0.038380  |
| C  | -3.026017 | 1.159254  | 0.076057  |
| H  | -3.746312 | 1.171829  | -0.745923 |
| C  | -2.069729 | 2.333743  | -0.122297 |
| H  | -2.542360 | 3.226882  | -0.536095 |
| C  | -0.617613 | 2.133243  | -0.324677 |
| C  | -0.089425 | 0.643905  | -0.306216 |
| C  | -0.211421 | 0.120957  | 1.155092  |
| H  | -0.111710 | 0.959270  | 1.842114  |
| O  | -1.578260 | -0.358736 | 1.269210  |
| Br | -3.612397 | -1.629682 | -0.096256 |
| C  | -1.164576 | -0.237101 | -1.071109 |
| O  | -3.772938 | 1.292929  | 1.260914  |
| H  | -3.152796 | 1.094660  | 1.985262  |
| O  | -1.144481 | 2.615793  | 0.932555  |
| C  | 1.361556  | 0.566149  | -0.853254 |
| H  | 1.894222  | 1.480172  | -0.588634 |
| H  | 1.352812  | 0.523751  | -1.947542 |
| C  | 2.216842  | -0.592227 | -0.330188 |
| H  | 1.906136  | -1.550112 | -0.747069 |
| C  | 2.212418  | -0.757278 | 1.194873  |
| C  | 0.749453  | -0.983661 | 1.610718  |
| H  | 0.439645  | -1.953218 | 1.210036  |
| H  | 0.693589  | -1.067337 | 2.701008  |
| C  | 3.106330  | -1.892838 | 1.687130  |
| H  | 2.791116  | -2.835524 | 1.222392  |

|    |           |           |           |
|----|-----------|-----------|-----------|
| H  | 3.022424  | -1.997027 | 2.772215  |
| H  | 4.150219  | -1.710589 | 1.426292  |
| Cl | 2.812887  | 0.800701  | 1.997034  |
| Br | 4.050215  | -0.368350 | -1.075065 |
| C  | 0.153079  | 3.195252  | -1.084699 |
| H  | -0.433793 | 4.117443  | -1.118518 |
| H  | 0.367965  | 2.884291  | -2.112660 |
| H  | 1.103061  | 3.427895  | -0.592925 |
| C  | -0.714246 | -1.683884 | -1.359773 |
| H  | 0.176196  | -1.685715 | -1.996465 |
| H  | -1.504551 | -2.207452 | -1.903080 |
| H  | -0.516048 | -2.267424 | -0.460455 |
| C  | -1.628514 | 0.330937  | -2.427489 |
| H  | -0.837991 | 0.203280  | -3.175718 |
| H  | -1.898054 | 1.387927  | -2.409328 |
| H  | -2.500887 | -0.233255 | -2.774967 |

**SCF Energy (PCM/mPW1PW91/6-31+G\*\*) =  
-6413.75626575**

**Number of imaginary frequencies = 0**

**3c\_C002**

**B3LYP/6-31G\* Geometry**

|    |           |           |           |
|----|-----------|-----------|-----------|
| C  | 2.101472  | -0.064767 | -0.198695 |
| C  | 2.551064  | 1.358104  | -0.601244 |
| H  | 3.448481  | 1.617267  | -0.032997 |
| C  | 1.470356  | 2.375200  | -0.247748 |
| H  | 1.851979  | 3.383196  | -0.072685 |
| C  | 0.196141  | 1.977288  | 0.392726  |
| C  | -0.015775 | 0.435687  | 0.668108  |
| C  | -0.172761 | -0.283744 | -0.705691 |
| H  | -0.612227 | 0.413447  | -1.414916 |
| O  | 1.181467  | -0.547824 | -1.155701 |
| Br | 3.721532  | -1.227117 | -0.318872 |
| C  | 1.381775  | -0.134335 | 1.178995  |
| O  | 2.909813  | 1.423683  | -1.960169 |
| H  | 2.170588  | 1.016548  | -2.446271 |
| O  | 0.253126  | 2.351952  | -1.000445 |
| C  | -1.234114 | 0.144177  | 1.585723  |
| H  | -1.480980 | 1.006822  | 2.205099  |
| H  | -0.989399 | -0.658346 | 2.287080  |
| C  | -2.505664 | -0.300280 | 0.845792  |
| H  | -3.329127 | -0.422617 | 1.549641  |
| C  | -2.281635 | -1.621495 | 0.080314  |
| C  | -0.972163 | -1.600639 | -0.757113 |
| H  | -0.336088 | -2.426051 | -0.432083 |
| H  | -1.203071 | -1.797697 | -1.805934 |
| C  | -2.275767 | -2.790982 | 1.081413  |
| H  | -1.432058 | -2.712461 | 1.774107  |

|    |           |           |           |
|----|-----------|-----------|-----------|
| H  | -2.176294 | -3.735378 | 0.539771  |
| H  | -3.205216 | -2.822907 | 1.657250  |
| Cl | -3.727415 | -1.959350 | -1.018790 |
| Br | -3.144015 | 1.178431  | -0.332052 |
| C  | -0.492657 | 3.007494  | 1.267158  |
| H  | -0.170411 | 4.007510  | 0.963393  |
| H  | -0.238200 | 2.874551  | 2.325098  |
| H  | -1.578162 | 2.955103  | 1.154271  |
| C  | 1.336023  | -1.583891 | 1.705755  |
| H  | 0.678521  | -1.667221 | 2.576757  |
| H  | 2.336503  | -1.878096 | 2.030697  |
| H  | 1.024851  | -2.309129 | 0.954326  |
| C  | 2.064228  | 0.695959  | 2.284165  |
| H  | 1.540944  | 0.551232  | 3.236361  |
| H  | 2.101024  | 1.768340  | 2.086616  |
| H  | 3.092919  | 0.343700  | 2.418788  |

**SCF Energy (PCM/mPW1PW91/6-31+G\*\*) =  
-6413.74423243**

**Number of imaginary frequencies = 0**

**3d\_C001**

**B3LYP/6-31G\* Geometry**

|    |           |           |           |
|----|-----------|-----------|-----------|
| C  | -2.329314 | -0.08429  | 0.066428  |
| C  | -2.84865  | 1.276906  | 0.596551  |
| H  | -3.642245 | 1.62319   | -0.071099 |
| C  | -1.747064 | 2.339048  | 0.577453  |
| H  | -2.118039 | 3.360806  | 0.476554  |
| C  | -0.379326 | 2.024283  | 0.113599  |
| C  | -0.114074 | 0.534233  | -0.311027 |
| C  | -0.199156 | -0.358142 | 0.967855  |
| H  | 0.028208  | 0.240914  | 1.850642  |
| O  | -1.590125 | -0.745476 | 1.080514  |
| Br | -3.931717 | -1.209652 | -0.285628 |
| C  | -1.369097 | 0.037899  | -1.147722 |
| O  | -3.430863 | 1.146215  | 1.871096  |
| H  | -2.806703 | 0.612674  | 2.394354  |
| O  | -0.675683 | 2.217628  | 1.519428  |
| C  | 1.274822  | 0.349397  | -0.968402 |
| H  | 1.526458  | 1.187224  | -1.618665 |
| H  | 1.308884  | -0.549018 | -1.58841  |
| C  | 2.311086  | 0.205145  | 0.148274  |
| H  | 2.141362  | 0.968101  | 0.91204   |
| C  | 2.221024  | -1.166575 | 0.86304   |
| C  | 0.719639  | -1.582444 | 0.946638  |
| H  | 0.477207  | -2.221949 | 0.100416  |
| H  | 0.555751  | -2.17492  | 1.852737  |
| C  | 2.899781  | -1.12179  | 2.230701  |
| H  | 3.933137  | -0.776955 | 2.138494  |

|    |           |           |           |
|----|-----------|-----------|-----------|
| H  | 2.894645  | -2.110151 | 2.697094  |
| H  | 2.357817  | -0.427773 | 2.88631   |
| Cl | 3.0715    | -2.468931 | -0.133194 |
| Br | 4.1293    | 0.657018  | -0.488524 |
| C  | 0.457989  | 3.138428  | -0.483076 |
| H  | 0.128238  | 4.096481  | -0.071796 |
| H  | 0.353037  | 3.177629  | -1.573131 |
| H  | 1.522857  | 3.023397  | -0.253477 |
| C  | -1.1801   | -1.330359 | -1.837064 |
| H  | -0.326958 | -1.313126 | -2.521277 |
| H  | -2.069158 | -1.558898 | -2.429717 |
| H  | -1.054072 | -2.151302 | -1.130734 |
| C  | -1.854409 | 1.011107  | -2.238937 |
| H  | -1.161596 | 0.994695  | -3.087749 |
| H  | -1.952931 | 2.047318  | -1.910387 |
| H  | -2.83234  | 0.681647  | -2.606751 |

**SCF Energy (PCM/mPW1PW91/6-31+G\*\*) =  
-6413.7500255**

**Number of imaginary frequencies = 0**

**3d\_C002**

**B3LYP/6-31G\* Geometry**

|    |           |           |           |
|----|-----------|-----------|-----------|
| C  | 2.034897  | -0.288163 | -0.221578 |
| C  | 3.058478  | 0.866220  | -0.114770 |
| H  | 3.848374  | 0.566146  | 0.579149  |
| C  | 2.401889  | 2.118012  | 0.460019  |
| H  | 3.092433  | 2.776759  | 0.990337  |
| C  | 0.970124  | 2.149384  | 0.826804  |
| C  | 0.125496  | 0.835515  | 0.551559  |
| C  | 0.038015  | 0.645449  | -0.994664 |
| H  | 0.127249  | 1.616680  | -1.478802 |
| O  | 1.227187  | -0.095568 | -1.366808 |
| Br | 3.091612  | -1.946581 | -0.543994 |
| C  | 1.052957  | -0.388325 | 0.978162  |
| O  | 3.686298  | 1.120913  | -1.348250 |
| H  | 2.971227  | 1.132320  | -2.009396 |
| O  | 1.460199  | 2.828536  | -0.353519 |
| C  | -1.273750 | 0.937397  | 1.246121  |
| H  | -1.467299 | 1.990847  | 1.456267  |
| H  | -1.246777 | 0.452102  | 2.225786  |
| C  | -2.556948 | 0.468213  | 0.508126  |
| H  | -3.403493 | 1.031823  | 0.899909  |
| C  | -2.464419 | 0.668443  | -1.015599 |
| C  | -1.215059 | -0.042313 | -1.544723 |
| H  | -1.262952 | -1.095755 | -1.263961 |
| H  | -1.188021 | 0.007636  | -2.637591 |
| C  | -2.502631 | 2.172495  | -1.341589 |
| H  | -3.454377 | 2.605990  | -1.022060 |

|    |           |           |           |
|----|-----------|-----------|-----------|
| H  | -2.404195 | 2.322014  | -2.420433 |
| H  | -1.692410 | 2.720284  | -0.850319 |
| Cl | -3.939098 | -0.044816 | -1.854763 |
| Br | -3.072088 | -1.392713 | 1.007469  |
| C  | 0.554729  | 3.115536  | 1.921957  |
| H  | 1.353006  | 3.845598  | 2.082543  |
| H  | 0.364208  | 2.600938  | 2.869786  |
| H  | -0.345522 | 3.678220  | 1.651204  |
| C  | 0.348071  | -1.755791 | 0.988454  |
| H  | -0.493884 | -1.755407 | 1.681019  |
| H  | 1.056965  | -2.519461 | 1.317736  |
| H  | -0.011507 | -2.057365 | 0.004627  |
| C  | 1.724368  | -0.240161 | 2.356826  |
| H  | 0.978022  | -0.368975 | 3.149227  |
| H  | 2.223035  | 0.716688  | 2.521291  |
| H  | 2.470458  | -1.032457 | 2.481009  |

**SCF Energy (PCM/mPW1PW91/6-31+G\*\*) =  
-6413.74212982**

**Number of imaginary frequencies = 0**

**3e\_C001**

**B3LYP/6-31G\* Geometry**

|    |           |           |           |
|----|-----------|-----------|-----------|
| C  | -2.218987 | -0.208897 | 0.205082  |
| C  | -2.993016 | 1.092534  | 0.543180  |
| H  | -3.362328 | 0.974428  | 1.572561  |
| C  | -2.044480 | 2.286655  | 0.467737  |
| H  | -2.563424 | 3.208446  | 0.200515  |
| C  | -0.616405 | 2.133945  | 0.119351  |
| C  | -0.085964 | 0.664667  | -0.119604 |
| C  | -0.135964 | -0.088464 | 1.243012  |
| H  | -0.021116 | 0.631007  | 2.051791  |
| O  | -1.489801 | -0.606172 | 1.333475  |
| Br | -3.615574 | -1.636464 | -0.101940 |
| C  | -1.201392 | -0.087405 | -0.963076 |
| O  | -4.038696 | 1.402116  | -0.356222 |
| H  | -4.609567 | 0.615134  | -0.406400 |
| O  | -1.041107 | 2.433889  | 1.470648  |
| C  | 1.336029  | 0.689765  | -0.741712 |
| H  | 1.875179  | 1.559259  | -0.364073 |
| H  | 1.273052  | 0.815776  | -1.827555 |
| C  | 2.222363  | -0.524301 | -0.446098 |
| H  | 1.895476  | -1.409937 | -0.991209 |
| C  | 2.295191  | -0.923200 | 1.032965  |
| C  | 0.856516  | -1.233833 | 1.476064  |
| H  | 0.537123  | -2.134867 | 0.943622  |
| H  | 0.854299  | -1.486959 | 2.541356  |
| C  | 3.219514  | -2.108508 | 1.301059  |
| H  | 2.892014  | -2.970837 | 0.706812  |

|    |           |           |           |
|----|-----------|-----------|-----------|
| H  | 3.183552  | -2.383657 | 2.358710  |
| H  | 4.249636  | -1.872213 | 1.029374  |
| Cl | 2.922437  | 0.499750  | 2.038634  |
| Br | 4.016367  | -0.166254 | -1.234121 |
| C  | 0.082900  | 3.302304  | -0.548536 |
| H  | -0.516323 | 4.207709  | -0.417384 |
| H  | 0.220682  | 3.134326  | -1.621796 |
| H  | 1.064673  | 3.489675  | -0.102041 |
| C  | -0.767326 | -1.471925 | -1.487046 |
| H  | 0.097182  | -1.371300 | -2.150634 |
| H  | -1.577457 | -1.907636 | -2.076961 |
| H  | -0.532797 | -2.185180 | -0.696180 |
| C  | -1.712496 | 0.687008  | -2.192803 |
| H  | -0.925825 | 0.722811  | -2.956053 |
| H  | -2.038095 | 1.704665  | -1.984125 |
| H  | -2.567196 | 0.158017  | -2.625637 |

**SCF Energy (PCM/mPW1PW91/6-31+G\*\*) =  
-6413.75368963**

**Number of imaginary frequencies = 0**

**3e\_C002**

**B3LYP/6-31G\* Geometry**

|    |           |           |           |
|----|-----------|-----------|-----------|
| C  | -2.218869 | -0.208917 | 0.205203  |
| C  | -2.993126 | 1.092447  | 0.542992  |
| H  | -3.362697 | 0.974370  | 1.572270  |
| C  | -2.044866 | 2.286767  | 0.467217  |
| H  | -2.563995 | 3.208291  | 0.199541  |
| C  | -0.616690 | 2.134153  | 0.118900  |
| C  | -0.085930 | 0.664962  | -0.119610 |
| C  | -0.135892 | -0.087795 | 1.243285  |
| H  | -0.021435 | 0.632015  | 2.051828  |
| O  | -1.489735 | -0.605760 | 1.333728  |
| Br | -3.615096 | -1.636963 | -0.101716 |
| C  | -1.201372 | -0.087667 | -0.962916 |
| O  | -4.038821 | 1.401932  | -0.356463 |
| H  | -4.609451 | 0.614713  | -0.406631 |
| O  | -1.041514 | 2.434606  | 1.470057  |
| C  | 1.336076  | 0.689766  | -0.741699 |
| H  | 1.875296  | 1.559242  | -0.364171 |
| H  | 1.273155  | 0.815620  | -1.827571 |
| C  | 2.222242  | -0.524320 | -0.445799 |
| H  | 1.895064  | -1.410086 | -0.990581 |
| C  | 2.295300  | -0.922546 | 1.033360  |
| C  | 0.856667  | -1.232918 | 1.476905  |
| H  | 0.537020  | -2.134248 | 0.945169  |
| H  | 0.854734  | -1.485280 | 2.542383  |
| C  | 3.219442  | -2.107947 | 1.301812  |
| H  | 2.891644  | -2.970491 | 0.708052  |

|    |           |           |           |
|----|-----------|-----------|-----------|
| H  | 3.183622  | -2.382597 | 2.359597  |
| H  | 4.249576  | -1.871975 | 1.029841  |
| Cl | 2.922727  | 0.500705  | 2.038300  |
| Br | 4.016175  | -0.166813 | -1.234328 |
| C  | 0.082113  | 3.302390  | -0.549686 |
| H  | -0.516779 | 4.207892  | -0.417699 |
| H  | 0.218416  | 3.134310  | -1.623126 |
| H  | 1.064483  | 3.489652  | -0.104545 |
| C  | -0.767070 | -1.472250 | -1.486429 |
| H  | 0.097164  | -1.371743 | -2.150406 |
| H  | -1.577280 | -1.908507 | -2.075860 |
| H  | -0.532063 | -2.185047 | -0.695299 |
| C  | -1.712704 | 0.686311  | -2.192736 |
| H  | -0.926077 | 0.722309  | -2.956040 |
| H  | -2.038666 | 1.703894  | -1.984193 |
| H  | -2.567254 | 0.156988  | -2.625499 |

**SCF Energy (PCM/mPW1PW91/6-31+G\*\*) =  
-6413.75368600**

**Number of imaginary frequencies = 0**

**3e\_C003**

**B3LYP/6-31G\* Geometry**

|    |           |           |           |
|----|-----------|-----------|-----------|
| C  | 2.041982  | -0.141484 | -0.335558 |
| C  | 2.492260  | 1.236623  | -0.885131 |
| H  | 2.571976  | 1.123620  | -1.976356 |
| C  | 1.442962  | 2.290903  | -0.545682 |
| H  | 1.882721  | 3.283435  | -0.435337 |
| C  | 0.206420  | 1.963729  | 0.195910  |
| C  | -0.023746 | 0.446050  | 0.572654  |
| C  | -0.238966 | -0.358172 | -0.745131 |
| H  | -0.674180 | 0.302870  | -1.490836 |
| O  | 1.095071  | -0.690677 | -1.208293 |
| Br | 3.665653  | -1.343308 | -0.436650 |
| C  | 1.382848  | -0.112661 | 1.074325  |
| O  | 3.691969  | 1.727133  | -0.319510 |
| H  | 4.363422  | 1.031624  | -0.434772 |
| O  | 0.186002  | 2.265244  | -1.218212 |
| C  | -1.213292 | 0.236604  | 1.546933  |
| H  | -1.412473 | 1.135753  | 2.130384  |
| H  | -0.964322 | -0.537475 | 2.278198  |
| C  | -2.522117 | -0.206377 | 0.874288  |
| H  | -3.326076 | -0.261250 | 1.608543  |
| C  | -2.362645 | -1.576746 | 0.181511  |
| C  | -1.074557 | -1.651205 | -0.685702 |
| H  | -0.452910 | -2.468812 | -0.315860 |
| H  | -1.336337 | -1.915587 | -1.712212 |
| C  | -2.369731 | -2.685227 | 1.249762  |
| H  | -1.507986 | -2.593059 | 1.918560  |

|    |           |           |           |
|----|-----------|-----------|-----------|
| H  | -2.312384 | -3.662739 | 0.763550  |
| H  | -3.285799 | -2.652747 | 1.846605  |
| Cl | -3.846426 | -1.927664 | -0.861343 |
| Br | -3.148559 | 1.223830  | -0.367209 |
| C  | -0.402109 | 3.057743  | 1.051907  |
| H  | -0.061535 | 4.030059  | 0.684695  |
| H  | -0.099531 | 2.966642  | 2.101261  |
| H  | -1.493278 | 3.038970  | 0.993171  |
| C  | 1.330876  | -1.530483 | 1.682012  |
| H  | 0.705366  | -1.552800 | 2.579741  |
| H  | 2.337082  | -1.824690 | 1.989615  |
| H  | 0.977775  | -2.289882 | 0.984529  |
| C  | 2.098331  | 0.772590  | 2.111591  |
| H  | 1.550447  | 0.737993  | 3.061097  |
| H  | 2.209639  | 1.813680  | 1.813895  |
| H  | 3.103912  | 0.381496  | 2.295441  |

**SCF Energy (PCM/mPW1PW91/6-31+G\*\*) =  
-6413.74237063**

**Number of imaginary frequencies = 0**

**3f\_C001**

**B3LYP/6-31G\* Geometry**

|    |           |           |           |
|----|-----------|-----------|-----------|
| C  | -2.288826 | -0.170083 | 0.216349  |
| C  | -2.801436 | 1.129084  | 0.907559  |
| H  | -3.045538 | 0.850460  | 1.943641  |
| C  | -1.717721 | 2.209547  | 0.899832  |
| H  | -2.142768 | 3.213355  | 0.862828  |
| C  | -0.380631 | 1.963758  | 0.326672  |
| C  | -0.110957 | 0.510160  | -0.205699 |
| C  | -0.137021 | -0.472685 | 1.009003  |
| H  | 0.087954  | 0.070990  | 1.927604  |
| O  | -1.510312 | -0.913651 | 1.120865  |
| Br | -3.911222 | -1.297100 | -0.160050 |
| C  | -1.391473 | 0.059635  | -1.031139 |
| O  | -3.899111 | 1.735580  | 0.254462  |
| H  | -4.579101 | 1.048200  | 0.140263  |
| O  | -0.587183 | 2.074262  | 1.760362  |
| C  | 1.254821  | 0.393907  | -0.923739 |
| H  | 1.463269  | 1.271662  | -1.535440 |
| H  | 1.284928  | -0.468764 | -1.593010 |
| C  | 2.332577  | 0.215982  | 0.147715  |
| H  | 2.167842  | 0.929804  | 0.958547  |
| C  | 2.302627  | -1.196115 | 0.784720  |
| C  | 0.817715  | -1.662266 | 0.883482  |
| H  | 0.568704  | -2.254944 | 0.005151  |
| H  | 0.698762  | -2.316268 | 1.753612  |
| C  | 3.018256  | -1.207847 | 2.134136  |
| H  | 4.037995  | -0.826476 | 2.034242  |

|    |           |           |           |
|----|-----------|-----------|-----------|
| H  | 3.055559  | -2.220647 | 2.543242  |
| H  | 2.474973  | -0.569125 | 2.842609  |
| Cl | 3.161826  | -2.414737 | -0.306306 |
| Br | 4.116302  | 0.754552  | -0.518951 |
| C  | 0.386299  | 3.132737  | -0.258409 |
| H  | 0.046563  | 4.059290  | 0.212650  |
| H  | 0.223511  | 3.217084  | -1.338399 |
| H  | 1.464789  | 3.044524  | -0.087070 |
| C  | -1.205839 | -1.254726 | -1.819233 |
| H  | -0.395097 | -1.164857 | -2.547825 |
| H  | -2.120384 | -1.471030 | -2.377099 |
| H  | -1.013048 | -2.116309 | -1.179136 |
| C  | -1.920373 | 1.102686  | -2.031933 |
| H  | -1.213610 | 1.203753  | -2.864084 |
| H  | -2.096730 | 2.088692  | -1.604162 |
| H  | -2.872685 | 0.758150  | -2.447341 |

**SCF Energy (PCM/mPW1PW91/6-31+G\*\*) =  
-6413.74810020**

**Number of imaginary frequencies = 0**

**3f\_C002**

**B3LYP/6-31G\* Geometry**

|    |           |           |           |
|----|-----------|-----------|-----------|
| C  | 1.988512  | -0.255293 | -0.393065 |
| C  | 2.990911  | 0.927728  | -0.480188 |
| H  | 3.242241  | 1.044797  | -1.544788 |
| C  | 2.339829  | 2.201735  | 0.049881  |
| H  | 3.071009  | 2.875148  | 0.498816  |
| C  | 0.946308  | 2.228103  | 0.534327  |
| C  | 0.112703  | 0.886174  | 0.404975  |
| C  | -0.056119 | 0.570871  | -1.115343 |
| H  | 0.009148  | 1.499362  | -1.680465 |
| O  | 1.112727  | -0.199906 | -1.485650 |
| Br | 3.077727  | -1.933179 | -0.642616 |
| C  | 1.090725  | -0.282094 | 0.875129  |
| O  | 4.147238  | 0.771439  | 0.318996  |
| H  | 4.529635  | -0.096128 | 0.096944  |
| O  | 1.326694  | 2.855427  | -0.716642 |
| C  | -1.246332 | 1.021899  | 1.169499  |
| H  | -1.443833 | 2.086275  | 1.311972  |
| H  | -1.156354 | 0.611096  | 2.178870  |
| C  | -2.560359 | 0.485127  | 0.541350  |
| H  | -3.394222 | 1.061178  | 0.942279  |
| C  | -2.556217 | 0.581550  | -0.994898 |
| C  | -1.333054 | -0.157835 | -1.544679 |
| H  | -1.355476 | -1.190312 | -1.191114 |
| H  | -1.367975 | -0.182594 | -2.638159 |
| C  | -2.622472 | 2.059487  | -1.419403 |
| H  | -3.555815 | 2.513036  | -1.074244 |

|    |           |           |           |
|----|-----------|-----------|-----------|
| H  | -2.587874 | 2.135906  | -2.509767 |
| H  | -1.786804 | 2.638386  | -1.014407 |
| Cl | -4.071159 | -0.193326 | -1.697577 |
| Br | -3.010144 | -1.345858 | 1.192494  |
| C  | 0.602606  | 3.241762  | 1.610977  |
| H  | 1.403875  | 3.982776  | 1.680346  |
| H  | 0.487185  | 2.769246  | 2.591949  |
| H  | -0.320392 | 3.785393  | 1.380918  |
| C  | 0.409878  | -1.654007 | 1.024382  |
| H  | -0.387538 | -1.612260 | 1.766815  |
| H  | 1.147566  | -2.385013 | 1.365411  |
| H  | -0.007896 | -2.027139 | 0.089073  |
| C  | 1.825435  | -0.013824 | 2.200978  |
| H  | 1.108226  | -0.048762 | 3.029979  |
| H  | 2.360604  | 0.933965  | 2.243617  |
| H  | 2.561604  | -0.805470 | 2.371892  |

**SCF Energy (PCM/mPW1PW91/6-31+G\*\*) =  
-6413.74048021**

**Number of imaginary frequencies = 0**

**3g\_C001**

**B3LYP/6-31G\* Geometry**

|    |           |           |           |
|----|-----------|-----------|-----------|
| C  | -2.261834 | -0.214697 | -0.005284 |
| C  | -3.114444 | 1.008390  | 0.405647  |
| H  | -3.841015 | 1.211455  | -0.385474 |
| C  | -2.234008 | 2.247737  | 0.553353  |
| H  | -2.763918 | 3.189871  | 0.399705  |
| C  | -0.776209 | 2.201877  | 0.308707  |
| C  | -0.157605 | 0.799944  | -0.077857 |
| C  | -0.240866 | -0.120904 | 1.175326  |
| H  | -0.198004 | 0.494285  | 2.074024  |
| O  | -1.572373 | -0.696638 | 1.132945  |
| Br | -3.534632 | -1.644102 | -0.559444 |
| C  | -1.180053 | 0.105924  | -1.073119 |
| O  | -3.857488 | 0.754206  | 1.573018  |
| H  | -3.225731 | 0.371618  | 2.207937  |
| O  | -1.312482 | 2.288925  | 1.649631  |
| C  | 1.295310  | 0.966971  | -0.600366 |
| H  | 1.762431  | 1.813752  | -0.094175 |
| H  | 1.288029  | 1.228301  | -1.663791 |
| C  | 2.239618  | -0.231688 | -0.408343 |
| H  | 2.015865  | -1.047766 | -1.091546 |
| C  | 2.229081  | -0.773925 | 1.028499  |
| C  | 0.791496  | -1.250946 | 1.304880  |
| H  | 0.552416  | -2.070173 | 0.626179  |
| H  | 0.735410  | -1.660696 | 2.318747  |
| C  | 2.753990  | 0.200756  | 2.082356  |
| H  | 2.729934  | -0.267293 | 3.069882  |

|    |           |           |           |
|----|-----------|-----------|-----------|
| H  | 2.134871  | 1.104498  | 2.120536  |
| H  | 3.780084  | 0.496983  | 1.854855  |
| Cl | 3.297120  | -2.277885 | 1.093858  |
| Br | 4.051073  | 0.357505  | -0.990800 |
| C  | -0.089267 | 3.479389  | -0.135572 |
| H  | -0.736563 | 4.334199  | 0.079184  |
| H  | 0.127579  | 3.471405  | -1.208985 |
| H  | 0.852676  | 3.640622  | 0.398969  |
| C  | -0.642653 | -1.172287 | -1.748690 |
| H  | 0.252409  | -0.945982 | -2.336492 |
| H  | -1.395901 | -1.561021 | -2.438191 |
| H  | -0.417493 | -1.975035 | -1.047282 |
| C  | -1.682078 | 1.004758  | -2.220629 |
| H  | -0.886945 | 1.142432  | -2.962210 |
| H  | -2.019335 | 1.994774  | -1.910117 |
| H  | -2.517411 | 0.508976  | -2.726977 |

**SCF Energy (PCM/mPW1PW91/6-31+G\*\*) =  
-6413.75406435**

**Number of imaginary frequencies = 0**

**3g\_C002**

**B3LYP/6-31G\* Geometry**

|    |           |           |           |
|----|-----------|-----------|-----------|
| C  | -2.058871 | -0.013511 | -0.177901 |
| C  | -2.526527 | -1.479870 | -0.323111 |
| H  | -3.386960 | -1.641385 | 0.331676  |
| C  | -1.421846 | -2.435027 | 0.118649  |
| H  | -1.787636 | -3.403172 | 0.467135  |
| C  | -0.114719 | -1.947962 | 0.613918  |
| C  | 0.105562  | -0.383310 | 0.636376  |
| C  | 0.182134  | 0.110841  | -0.839330 |
| H  | 0.586153  | -0.691116 | -1.453066 |
| O  | -1.194772 | 0.301470  | -1.252118 |
| Br | -3.684543 | 1.124344  | -0.394112 |
| C  | -1.261684 | 0.270657  | 1.126475  |
| O  | -2.965633 | -1.757881 | -1.631314 |
| H  | -2.261560 | -1.428706 | -2.218170 |
| O  | -0.251800 | -2.531843 | -0.700763 |
| C  | 1.370310  | 0.038483  | 1.430234  |
| H  | 1.655010  | -0.718820 | 2.160654  |
| H  | 1.168422  | 0.946644  | 2.003840  |
| C  | 2.591035  | 0.371002  | 0.568249  |
| H  | 3.451077  | 0.605144  | 1.193645  |
| C  | 2.347690  | 1.516053  | -0.432229 |
| C  | 0.970506  | 1.400475  | -1.139932 |
| H  | 0.359815  | 2.269972  | -0.905944 |
| H  | 1.133273  | 1.433775  | -2.222653 |
| C  | 3.491912  | 1.752582  | -1.416042 |
| H  | 3.310974  | 2.673776  | -1.976549 |

|    |           |           |           |
|----|-----------|-----------|-----------|
| H  | 3.551127  | 0.918820  | -2.120652 |
| H  | 4.451247  | 1.841093  | -0.898048 |
| Cl | 2.329578  | 3.043019  | 0.667500  |
| Br | 3.204627  | -1.269000 | -0.420802 |
| C  | 0.631986  | -2.836548 | 1.590460  |
| H  | 0.299250  | -3.870108 | 1.459084  |
| H  | 0.439877  | -2.546733 | 2.630068  |
| H  | 1.709253  | -2.805403 | 1.408828  |
| C  | -1.184390 | 1.784993  | 1.413191  |
| H  | -0.466385 | 2.002500  | 2.208480  |
| H  | -2.161885 | 2.134554  | 1.753604  |
| H  | -0.921790 | 2.381020  | 0.540411  |
| C  | -1.876456 | -0.370474 | 2.385986  |
| H  | -1.301678 | -0.075766 | 3.271341  |
| H  | -1.917556 | -1.460724 | 2.364582  |
| H  | -2.898005 | 0.002015  | 2.519832  |

**SCF Energy (PCM/mPW1PW91/6-31+G\*\*) =  
-6413.74854482**

**Number of imaginary frequencies = 0**

**3h\_C001**

**B3LYP/6-31G\* Geometry**

|    |           |           |           |
|----|-----------|-----------|-----------|
| C  | -2.229661 | -0.278719 | 0.167845  |
| C  | -3.081820 | 0.886777  | 0.736531  |
| H  | -3.445001 | 0.552330  | 1.719501  |
| C  | -2.209844 | 2.129688  | 0.899490  |
| H  | -2.786301 | 3.050765  | 0.802117  |
| C  | -0.776526 | 2.134173  | 0.542852  |
| C  | -0.154171 | 0.767908  | 0.047973  |
| C  | -0.165420 | -0.228940 | 1.245377  |
| H  | -0.109882 | 0.331792  | 2.178351  |
| O  | -1.481510 | -0.837758 | 1.213488  |
| Br | -3.532622 | -1.700407 | -0.423345 |
| C  | -1.215331 | 0.121886  | -0.940212 |
| O  | -4.142110 | 1.300250  | -0.101720 |
| H  | -4.657899 | 0.503399  | -0.318599 |
| O  | -1.215557 | 2.155308  | 1.923825  |
| C  | 1.268615  | 0.991954  | -0.531575 |
| H  | 1.742063  | 1.822292  | -0.004397 |
| H  | 1.206557  | 1.306823  | -1.578552 |
| C  | 2.243934  | -0.193597 | -0.446647 |
| H  | 2.004859  | -0.977099 | -1.162283 |
| C  | 2.310875  | -0.810552 | 0.958244  |
| C  | 0.898309  | -1.337065 | 1.270806  |
| H  | 0.648044  | -2.125375 | 0.559701  |
| H  | 0.896213  | -1.800635 | 2.262799  |
| C  | 2.858268  | 0.122221  | 2.038164  |
| H  | 2.887948  | -0.395589 | 3.000344  |

|    |           |           |           |
|----|-----------|-----------|-----------|
| H  | 2.219271  | 1.005903  | 2.148122  |
| H  | 3.866177  | 0.455943  | 1.782905  |
| Cl | 3.415273  | -2.288339 | 0.898504  |
| Br | 4.014397  | 0.466668  | -1.077559 |
| C  | -0.158216 | 3.447536  | 0.103161  |
| H  | -0.812698 | 4.273132  | 0.396285  |
| H  | -0.019263 | 3.487674  | -0.982075 |
| H  | 0.814235  | 3.616576  | 0.577291  |
| C  | -0.693147 | -1.110882 | -1.706339 |
| H  | 0.163421  | -0.836332 | -2.330032 |
| H  | -1.475051 | -1.479857 | -2.374700 |
| H  | -0.412010 | -1.941555 | -1.059284 |
| C  | -1.766177 | 1.084156  | -2.008999 |
| H  | -0.974116 | 1.323467  | -2.728711 |
| H  | -2.170031 | 2.015257  | -1.615693 |
| H  | -2.573015 | 0.592066  | -2.560776 |

**SCF Energy (PCM/mPW1PW91/6-31+G\*\*) =  
-6413.75184030**

**Number of imaginary frequencies = 0**

**3h\_C002**

**B3LYP/6-31G\* Geometry**

|    |           |           |           |
|----|-----------|-----------|-----------|
| C  | 2.005185  | -0.044994 | -0.337223 |
| C  | 2.477832  | 1.396599  | -0.658746 |
| H  | 2.617959  | 1.440392  | -1.748951 |
| C  | 1.406033  | 2.394447  | -0.230879 |
| H  | 1.832381  | 3.360641  | 0.043370  |
| C  | 0.133382  | 1.967389  | 0.387803  |
| C  | -0.107545 | 0.412424  | 0.534690  |
| C  | -0.249532 | -0.195252 | -0.892947 |
| H  | -0.648600 | 0.567184  | -1.558400 |
| O  | 1.107422  | -0.458963 | -1.330401 |
| Br | 3.637325  | -1.223437 | -0.526236 |
| C  | 1.271865  | -0.218153 | 1.023456  |
| O  | 3.641788  | 1.797783  | 0.036513  |
| H  | 4.318524  | 1.118253  | -0.131685 |
| O  | 0.187730  | 2.466741  | -0.969147 |
| C  | -1.342135 | 0.069988  | 1.408474  |
| H  | -1.574520 | 0.876150  | 2.104676  |
| H  | -1.132880 | -0.807413 | 2.025805  |
| C  | -2.606933 | -0.282091 | 0.622376  |
| H  | -3.446779 | -0.445936 | 1.295625  |
| C  | -2.436794 | -1.500504 | -0.304407 |
| C  | -1.081805 | -1.481488 | -1.062298 |
| H  | -0.486133 | -2.345054 | -0.773682 |
| H  | -1.279610 | -1.599829 | -2.133128 |
| C  | -3.622285 | -1.764847 | -1.230102 |
| H  | -3.491741 | -2.728440 | -1.730066 |



|    |           |           |           |
|----|-----------|-----------|-----------|
| H  | -3.679691 | -0.980047 | -1.988953 |
| H  | -4.564988 | -1.783648 | -0.675609 |
| Cl | -2.426415 | -2.950200 | 0.896807  |
| Br | -3.211370 | 1.304866  | -0.454274 |
| C  | -0.528580 | 2.930374  | 1.354499  |
| H  | -0.179254 | 3.945299  | 1.144145  |
| H  | -0.278897 | 2.694163  | 2.395075  |
| H  | -1.615473 | 2.918758  | 1.239705  |
| C  | 1.188895  | -1.708294 | 1.417006  |
| H  | 0.514539  | -1.857016 | 2.264577  |
| H  | 2.178796  | -2.050526 | 1.728416  |
| H  | 0.867762  | -2.358044 | 0.603977  |
| C  | 1.925360  | 0.506147  | 2.215035  |
| H  | 1.333551  | 0.323830  | 3.120085  |
| H  | 2.036183  | 1.581348  | 2.084147  |
| H  | 2.926292  | 0.098340  | 2.386878  |

**SCF Energy (PCM/mPW1PW91/6-31+G\*\*) =  
-6413.74423243**

**Number of imaginary frequencies = 0**
